# Supplementary material for: Transcriptome Patterns of BRCA1- and BRCA2- Mutated Breast and Ovarian Cancers
Source: Int J Mol Sci. 2021 Jan 28;22(3):1266. doi: 10.3390/ijms22031266 (PMC7865215; doi:10.3390/ijms22031266)
Supplement: Supplementary file 1 [file ijms-22-01266-s001.zip › SupplementaryFigures.pdf]

## GO: Biological Process

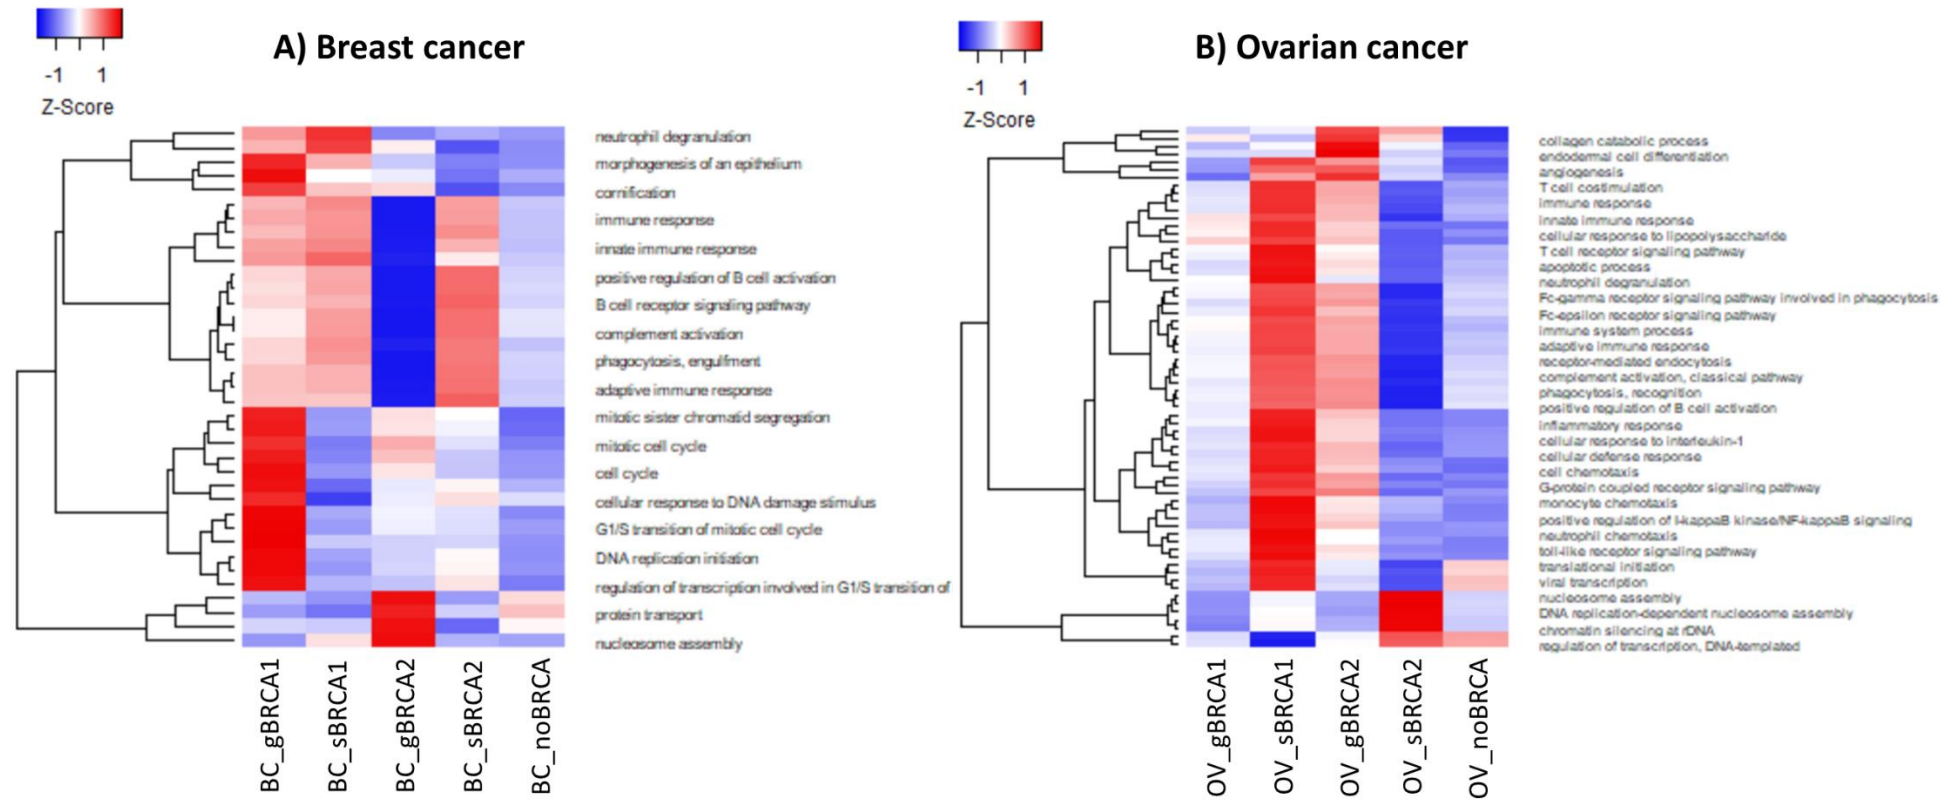

Figure S1. Clustering of deregulated BRCA1- and BRCA2-associated GO Biological Process functional categories in the breast (A) and ovarian (B) cancers.

## GO: Molecular Function

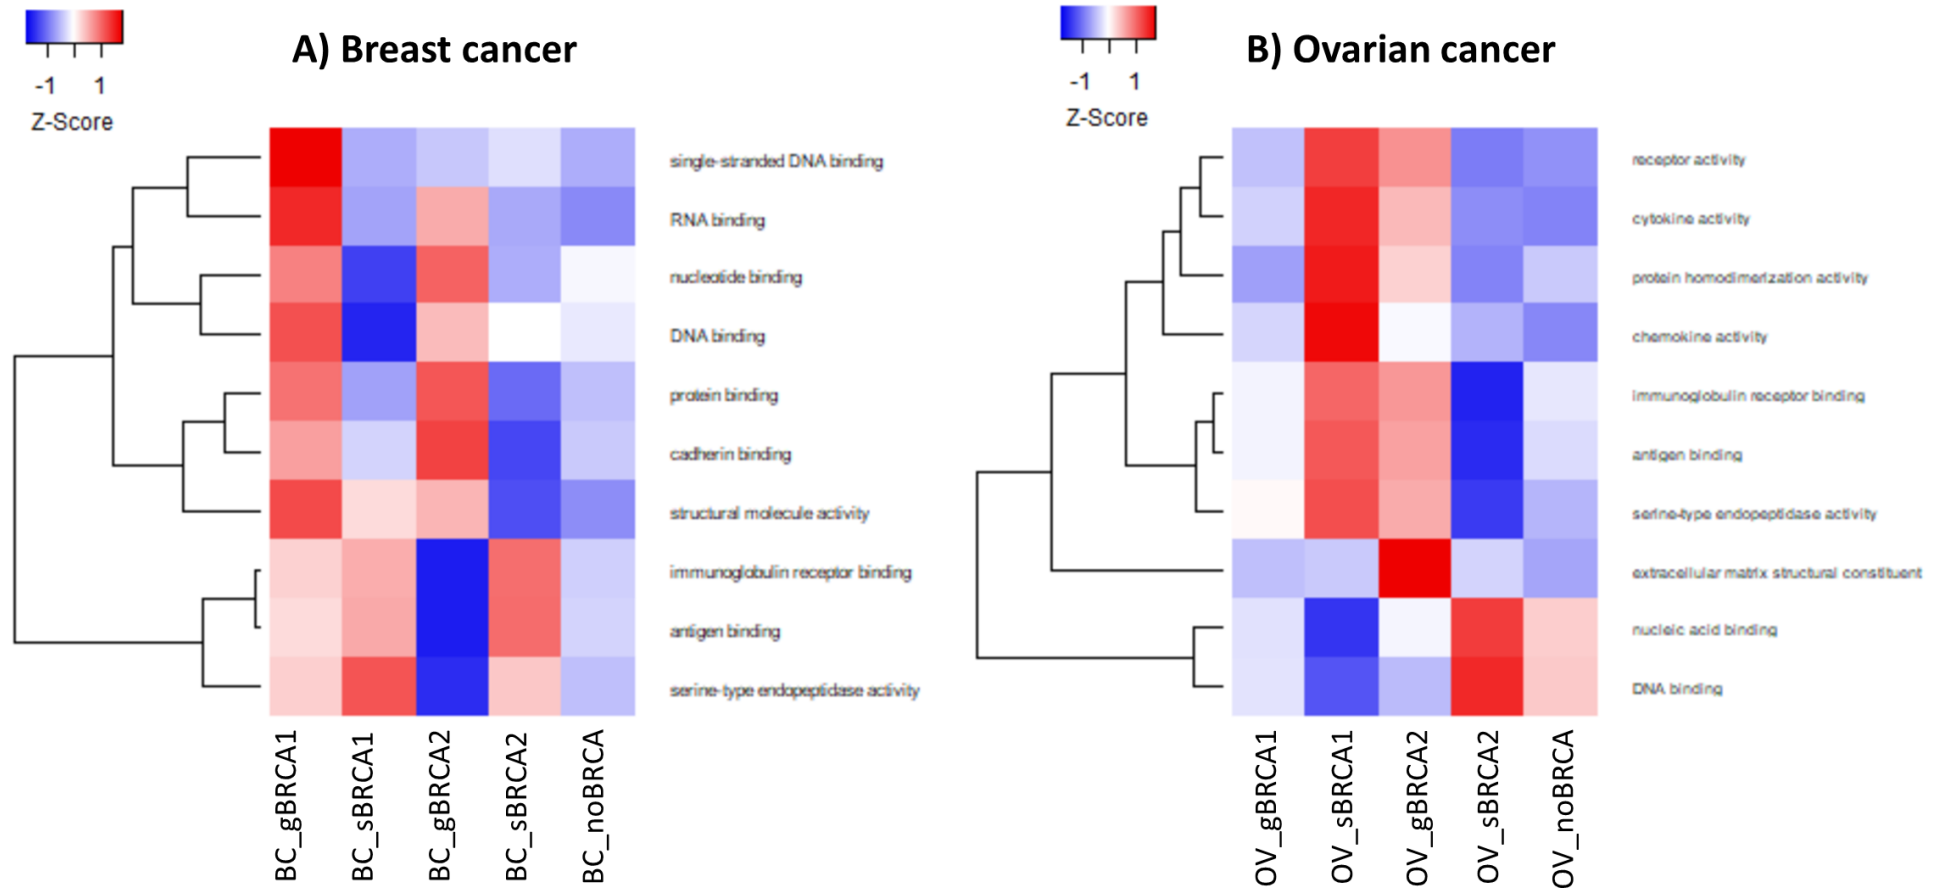

Figure S2. Clustering of deregulated BRCA1- and BRCA2-associated GO Molecular Function functional categories in the breast (A) and ovarian (B) cancers.

## Transcription factor targets

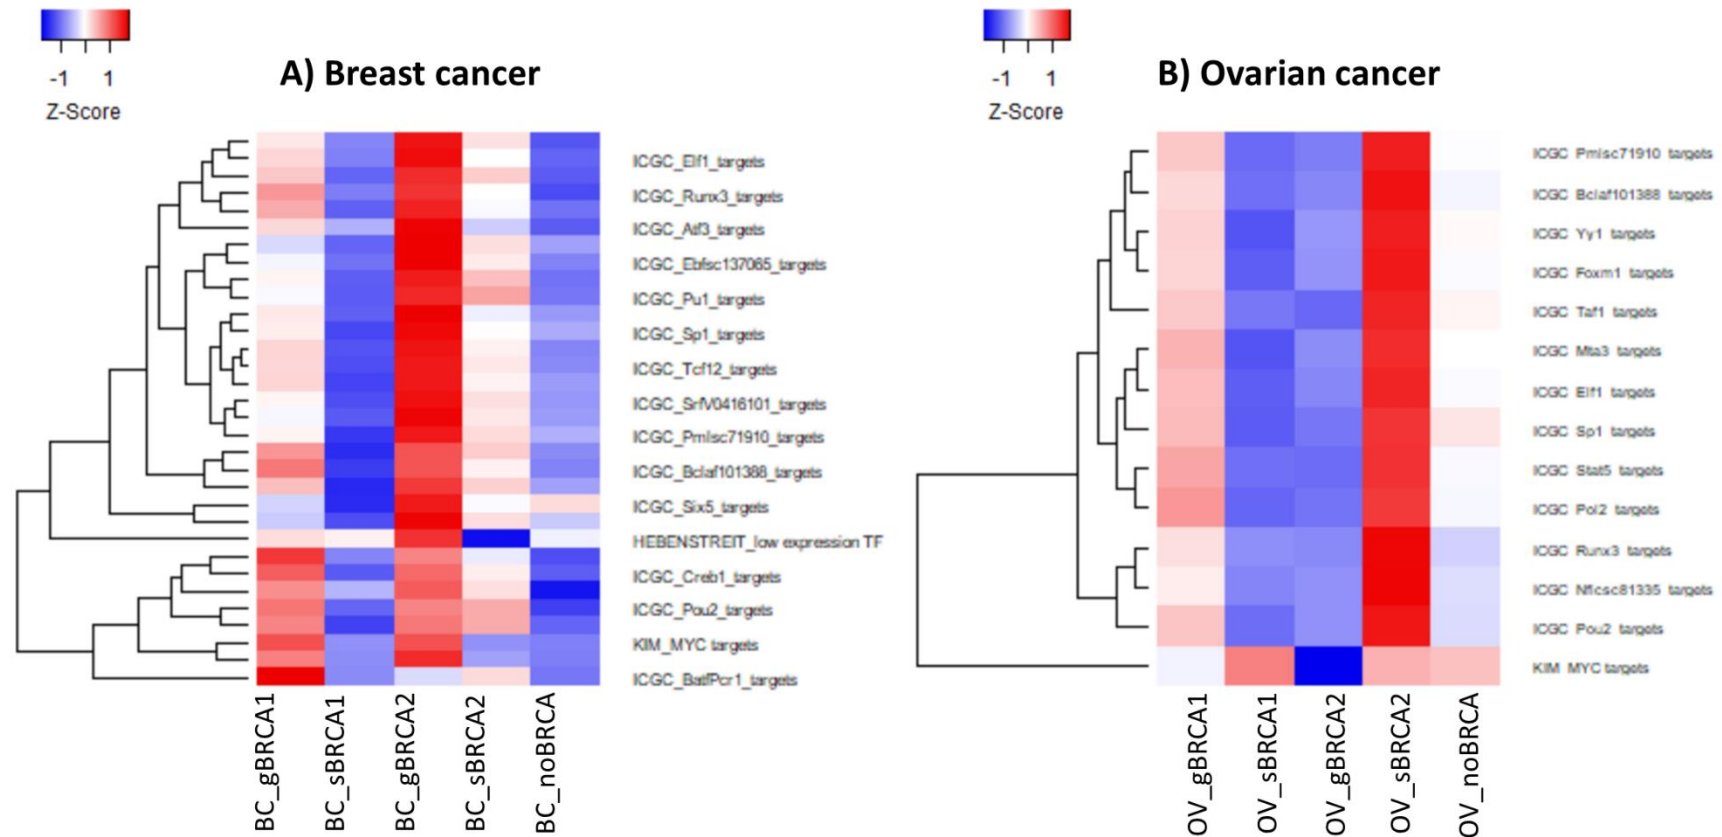

Figure S3. Clustering of deregulated BRCA1- and BRCA2-associated transcription factor targets in the breast (A) and ovarian (B) cancers.

## Cancer hallmarks

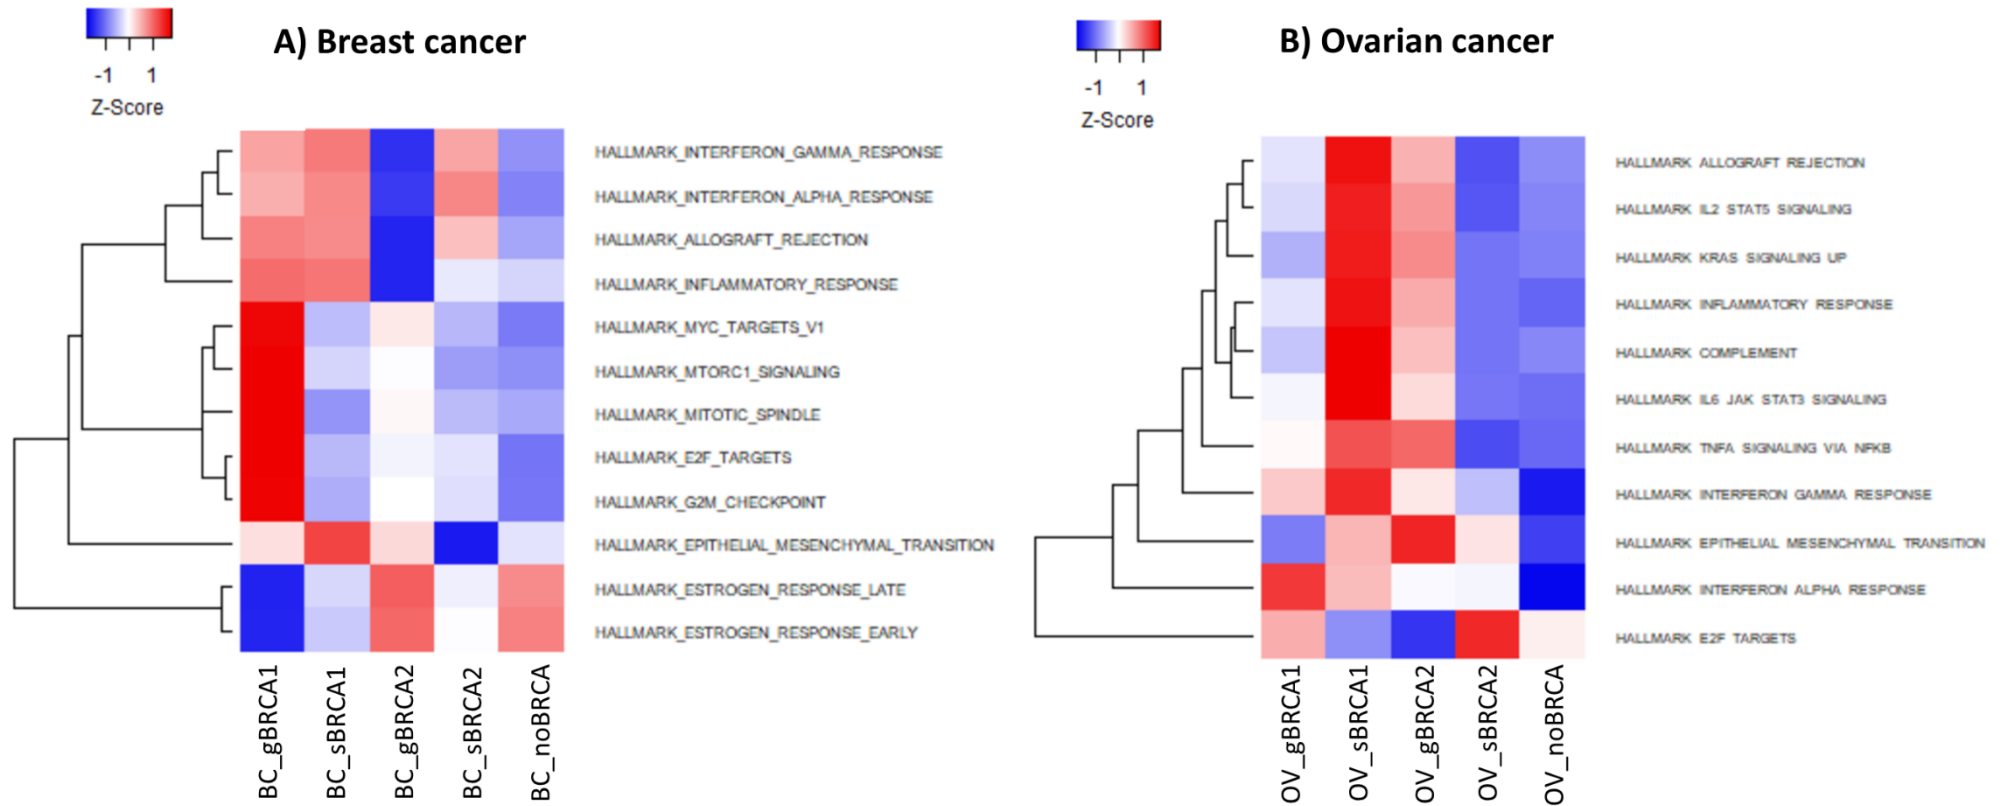

Figure S4. Clustering of deregulated BRCA1- and BRCA2-associated “cancer hallmarks” in the breast (A) and ovarian (B) cancers.

## GSEA C2

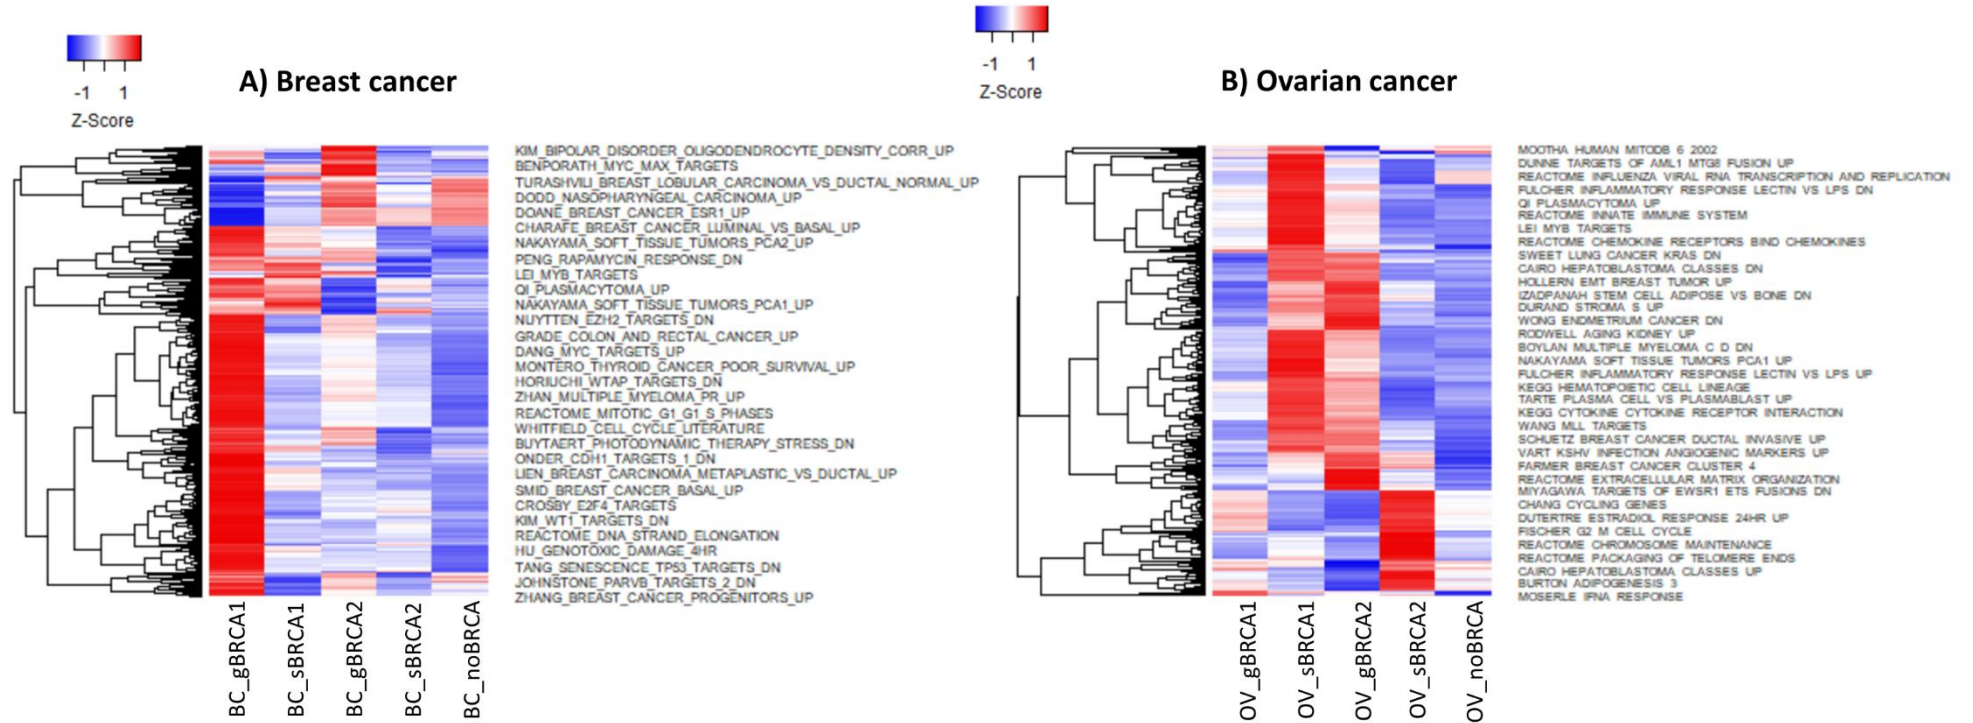

Figure S5. Clustering of deregulated BRCA1- and BRCA2-associated GSEA C2 functional categories in the breast (A) and ovarian (B) cancers.

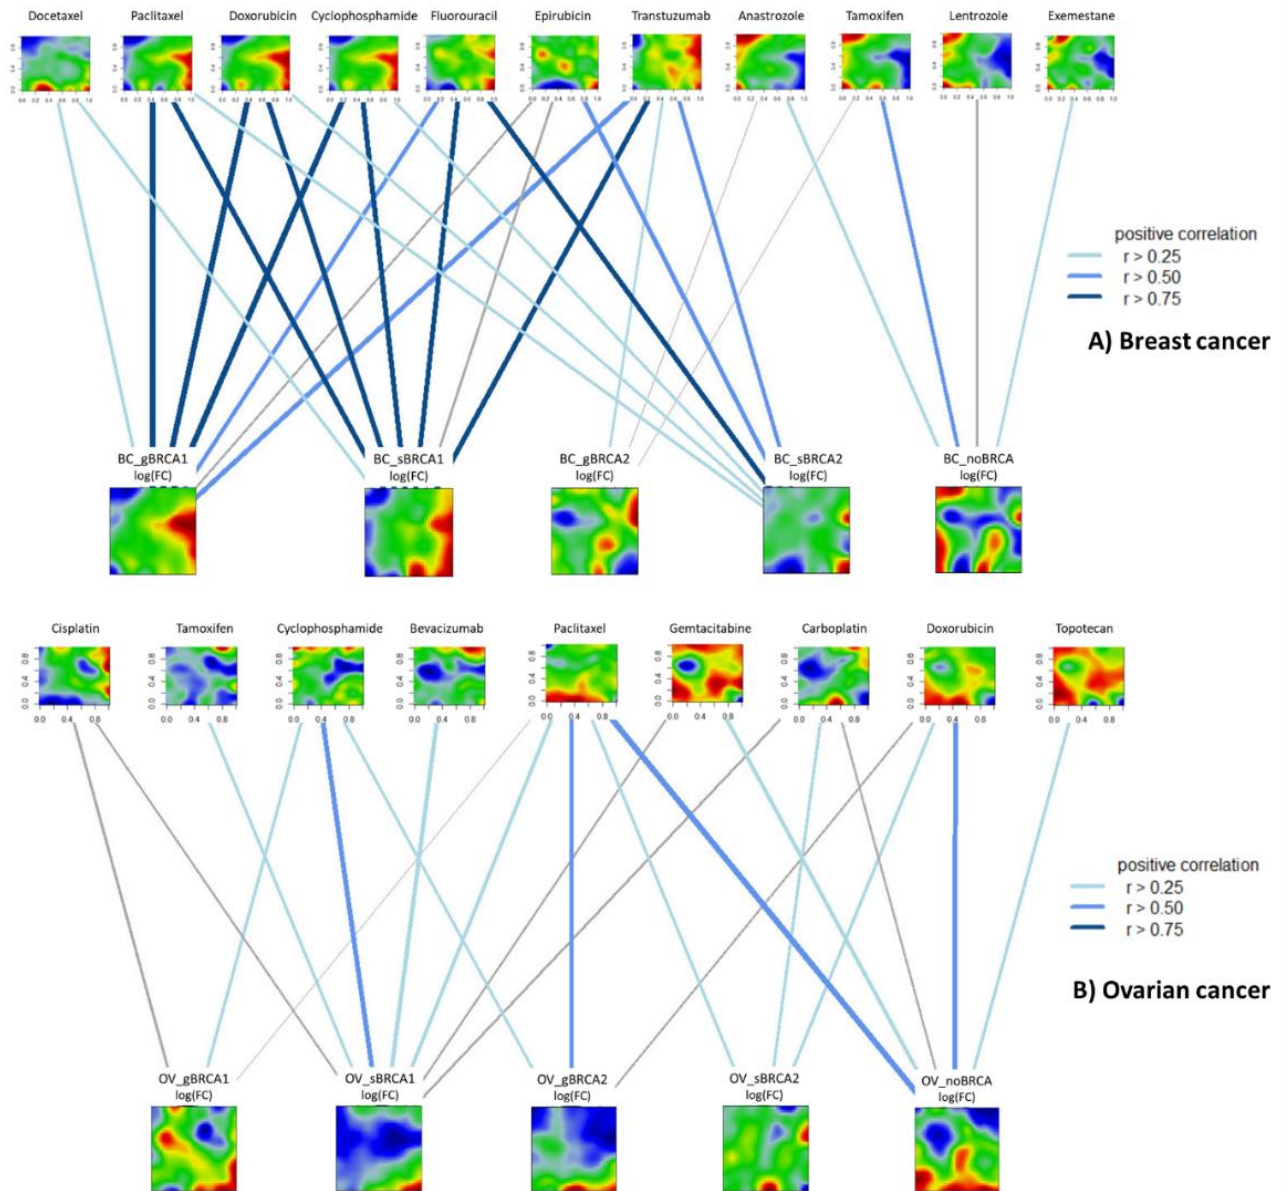

**Figure S6. Drug transcriptome map relations for breast(A) and ovarian(B) cancers.** Phenotype maps were generated based on linear regression coefficients between corresponding characteristics and metagene expression profiles across all samples in a given dataset (See Materials and methods section). The similarity between phenotype and transcriptome was calculated for each studied group separately using Pearson's correlation coefficient.
