# Supplementary material for: Transcriptome Patterns of BRCA1- and BRCA2- Mutated Breast and Ovarian Cancers
Source: Int J Mol Sci. 2021 Jan 28;22(3):1266. doi: 10.3390/ijms22031266 (PMC7865215; doi:10.3390/ijms22031266)
Supplement: Supplementary file 1 [file ijms-22-01266-s001.zip › SupplementatyData1.xlsx]

## Sheet: BC_gBRCA1.vs.BC_gBRCA2
Sample Summary:
%DE:;;0.28
#genes with fdr < 0.2;;1303
#genes with fdr < 0.1;;230
#genes with fdr < 0.05;;43
#genes with fdr < 0.01;;0
<FC> = 0
<t-score> = 0.02
<p-value> = 0.21
<fdr> = 0.72
Gene Statistics
Rank	ID	Symbol	logFC	WAD	T.Score	p.value	fdr	Fdr	Metagene	Spot	Chromosome	Description
1	ENSG00000131773	KHDRBS3	2.30069	1.67012	6.34036	3.63726e-06	0.0389048	0.0389048	40 x 16	C	8 q24	KH RNA binding domain containing, signal transduction associated 3 [Source:HGNC Symbol;Acc:HGNC:18117]
2	ENSG00000178935	ZNF552	-2.26095	-0.637488	-5.75578	5.36908e-06	0.0389048	0.0389048	10 x 37		19 q13	zinc finger protein 552 [Source:HGNC Symbol;Acc:HGNC:26135]
3	ENSG00000162415	ZSWIM5	-2.13678	-0.6283	-5.58285	8.3562e-06	0.0389048	0.0389048	1 x 35		1 p34	zinc finger SWIM-type containing 5 [Source:HGNC Symbol;Acc:HGNC:29299]
4	ENSG00000139618	BRCA2	1.84667	1.25893	5.5609	9.53789e-06	0.0389048	0.0389048	40 x 25	A	13 q13	BRCA2, DNA repair associated [Source:HGNC Symbol;Acc:HGNC:1101]
5	ENSG00000243230		0.979613	0.585167	5.56184	9.65143e-06	0.0389048	0.0389048	25 x 23		7 q32
6	ENSG00000135069	PSAT1	3.86331	3.39199	5.47771	1.09564e-05	0.0389048	0.0389048	34 x 24	B	9 q21	phosphoserine aminotransferase 1 [Source:HGNC Symbol;Acc:HGNC:19129]
7	ENSG00000230873	STMND1	-3.55678	-0.554282	-5.49878	1.18445e-05	0.04787	0.0389048	4 x 39		6 p22	stathmin domain containing 1 [Source:HGNC Symbol;Acc:HGNC:44668]
8	ENSG00000275409		-0.868212	-0.362482	-5.32327	1.84394e-05	0.04787	0.0416978	12 x 31		12 q24
9	ENSG00000232400		-2.1572	-0.630017	-5.51258	2.10274e-05	0.04787	0.0423702	1 x 18		7 p21	RAD17 checkpoint clamp loader component pseudogene 1 [Source:HGNC Symbol;Acc:HGNC:9808]
10	ENSG00000169621	PROKR1	1.26587	0.791428	5.31195	2.1559e-05	0.04787	0.0424906	34 x 20		2 p13	aprataxin and PNKP like factor [Source:HGNC Symbol;Acc:HGNC:28724]
11	ENSG00000186834	HEXIM1	-1.23589	-0.471765	-5.25879	2.24828e-05	0.04787	0.0426877	12 x 37		17 q21	hexamethylene bisacetamide inducible 1 [Source:HGNC Symbol;Acc:HGNC:24953]
12	ENSG00000223979	SMCR2	-0.927611	-0.381919	-5.37825	2.46672e-05	0.04787	0.0431009	9 x 34		17 p11	Smith-Magenis syndrome chromosome region, candidate 2 (non-protein coding) [Source:HGNC Symbol;Acc:HGNC:17914]
13	ENSG00000128602	SMO	1.57214	1.02977	5.16757	2.53738e-05	0.04787	0.0432208	31 x 25	B	7 q32	smoothened, frizzled class receptor [Source:HGNC Symbol;Acc:HGNC:11119]
14	ENSG00000173467	AGR3	-5.15799	0	-5.14464	3.19927e-05	0.04787	0.044107	4 x 40	K	7 p21	anterior gradient 3, protein disulphide isomerase family member [Source:HGNC Symbol;Acc:HGNC:24167]
15	ENSG00000105219	CNTD2	-1.99762	-0.614437	-5.10706	3.39578e-05	0.04787	0.0443086	13 x 40		19 q13	cyclin N-terminal domain containing 2 [Source:HGNC Symbol;Acc:HGNC:25805]
16	ENSG00000228801		0.946961	0.562653	5.07335	3.54694e-05	0.04787	0.0444495	31 x 32		8 q11
17	ENSG00000140403	DNAJA4	-1.63016	-0.559711	-5.0612	3.85015e-05	0.04787	0.0447011	27 x 13		15 q25	DnaJ heat shock protein family (Hsp40) member A4 [Source:HGNC Symbol;Acc:HGNC:14885]
18	ENSG00000213085	CFAP45	-1.48168	-0.530144	-4.99248	3.85694e-05	0.04787	0.0447063	1 x 40		1 q23	cilia and flagella associated protein 45 [Source:HGNC Symbol;Acc:HGNC:17229]
19	ENSG00000136295	TTYH3	0.912989	0.53945	4.99581	4.16564e-05	0.04787	0.0449263	22 x 9		7 p22	tweety family member 3 [Source:HGNC Symbol;Acc:HGNC:22222]
20	ENSG00000007516	BAIAP3	-2.56086	-0.6473	-4.94926	4.31859e-05	0.04787	0.0450244	1 x 39		16 p13	BAI1 associated protein 3 [Source:HGNC Symbol;Acc:HGNC:948]
21	ENSG00000117480	FAAH	-1.50574	-0.535226	-4.93933	4.3633e-05	0.04787	0.0450518	13 x 40		1 p33	fatty acid amide hydrolase [Source:HGNC Symbol;Acc:HGNC:3553]
22	ENSG00000228109	MELTF-AS1	1.75518	1.18094	5.06988	4.72121e-05	0.04787	0.0452538	32 x 34		3 q29	MELTF antisense RNA 1 [Source:HGNC Symbol;Acc:HGNC:40373]
23	ENSG00000234899	SOX9-AS1	2.73951	2.10567	4.89183	4.97138e-05	0.04787	0.0453786	22 x 25		17 q24	SOX9 antisense RNA 1 [Source:HGNC Symbol;Acc:HGNC:49321]
24	ENSG00000228639	LINC02095	2.52538	1.88845	4.90273	5.00427e-05	0.04787	0.0453941	21 x 24		17 q24	long intergenic non-protein coding RNA 2095 [Source:HGNC Symbol;Acc:HGNC:52946]
25	ENSG00000007062	PROM1	3.6325	3.10774	4.86346	5.31264e-05	0.04787	0.0455308	40 x 19	C	4 p15	prominin 1 [Source:HGNC Symbol;Acc:HGNC:9454]
26	ENSG00000263639	MSMB	-4.26387	-0.371044	-5.32847	5.33034e-05	0.04787	0.0455382	9 x 38	K	10 q11	microseminoprotein beta [Source:HGNC Symbol;Acc:HGNC:7372]
27	ENSG00000101098	RIMS4	-4.28065	-0.365514	-4.97038	5.52653e-05	0.04787	0.0456171	1 x 35		20 q13	regulating synaptic membrane exocytosis 4 [Source:HGNC Symbol;Acc:HGNC:16183]
28	ENSG00000172738	TMEM217	1.39628	0.890683	5.04643	5.55661e-05	0.0486283	0.0456287	35 x 19		6 p21	transmembrane protein 217 [Source:HGNC Symbol;Acc:HGNC:21238]
29	ENSG00000109436	TBC1D9	-2.55162	-0.647259	-5.01307	6.19046e-05	0.0486283	0.0459187	1 x 7	H	4 q31	TBC1 domain family member 9 [Source:HGNC Symbol;Acc:HGNC:21710]
30	ENSG00000175356	SCUBE2	-3.44835	-0.573776	-4.7849	6.52711e-05	0.0486283	0.0460511	2 x 1		11 p15	signal peptide, CUB domain and EGF like domain containing 2 [Source:HGNC Symbol;Acc:HGNC:30425]
31	ENSG00000171492	LRRC8D	1.13271	0.693497	5.08535	6.72288e-05	0.0486283	0.0461222	33 x 17		1 p22	leucine rich repeat containing 8 family member D [Source:HGNC Symbol;Acc:HGNC:16992]
32	ENSG00000064787	BCAS1	-3.7871	-0.505284	-4.76583	6.84172e-05	0.0486283	0.0461636	8 x 40	K	20 q13	breast carcinoma amplified sequence 1 [Source:HGNC Symbol;Acc:HGNC:974]
33	ENSG00000196371	FUT4	1.17208	0.722094	4.82231	6.98589e-05	0.0486283	0.0462119	35 x 20		11 q21	fucosyltransferase 4 [Source:HGNC Symbol;Acc:HGNC:4015]
34	ENSG00000157827	FMNL2	1.36658	0.867786	4.74316	7.34037e-05	0.0486283	0.0463231	10 x 7		2 q23	formin like 2 [Source:HGNC Symbol;Acc:HGNC:18267]
35	ENSG00000127585	FBXL16	-2.64502	-0.646908	-4.74743	7.46217e-05	0.0486283	0.0463589	14 x 40		16 p13	F-box and leucine rich repeat protein 16 [Source:HGNC Symbol;Acc:HGNC:14150]
36	ENSG00000173013	CCDC96	-1.37485	-0.506214	-4.71894	7.74945e-05	0.0486283	0.0464393	2 x 40		4 p16	coiled-coil domain containing 96 [Source:HGNC Symbol;Acc:HGNC:26900]
37	ENSG00000166685	COG1	-0.903822	-0.374218	-4.7478	7.92862e-05	0.0486283	0.0464866	24 x 14		17 q25	component of oligomeric golgi complex 1 [Source:HGNC Symbol;Acc:HGNC:6545]
38	ENSG00000108509	CAMTA2	-0.498708	-0.226147	-4.74428	8.12815e-05	0.0486283	0.0465369	19 x 14		17 p13	calmodulin binding transcription activator 2 [Source:HGNC Symbol;Acc:HGNC:18807]
39	ENSG00000144597	EAF1	-0.730446	-0.314758	-4.76884	8.1492e-05	0.0486283	0.046542	1 x 12	I	3 p25	ELL associated factor 1 [Source:HGNC Symbol;Acc:HGNC:20907]
40	ENSG00000064270	ATP2C2	-1.64522	-0.562471	-4.75233	8.46072e-05	0.0486283	0.0466157	12 x 37		16 q24	ATPase secretory pathway Ca2+ transporting 2 [Source:HGNC Symbol;Acc:HGNC:29103]
41	ENSG00000091831	ESR1	-4.40831	-0.321641	-4.69013	8.57715e-05	0.0486283	0.0466419	10 x 40	K	6 q25	estrogen receptor 1 [Source:HGNC Symbol;Acc:HGNC:3467]
42	ENSG00000204434		-2.82232	-0.64157	-4.95923	8.77819e-05	0.0486283	0.0466856	9 x 36		2 q21	POTE ankyrin domain family member K, pseudogene [Source:HGNC Symbol;Acc:HGNC:30182]
43	ENSG00000272269		1.15036	0.706279	4.93454	8.90232e-05	0.0486283	0.0467116	34 x 31		6 p22
44	ENSG00000267288	LOC105371795	-1.16025	-0.451432	-4.7719	8.94055e-05	0.0576023	0.0467195	6 x 31		17 q21
45	ENSG00000075891	PAX2	-2.86363	-0.639447	-4.88991	9.48322e-05	0.0576023	0.0472301	1 x 35		10 q24	paired box 2 [Source:HGNC Symbol;Acc:HGNC:8616]
46	ENSG00000260686		-1.15578	-0.450196	-4.63807	9.53346e-05	0.0576023	0.0472749	3 x 31		5 q23
47	ENSG00000071051	NCK2	0.94038	0.558141	4.63078	9.81152e-05	0.0576023	0.0475164	32 x 23	B	2 q12	NCK adaptor protein 2 [Source:HGNC Symbol;Acc:HGNC:7665]
48	ENSG00000261175		3.57712	3.04108	4.63942	0.000100906	0.0576023	0.0477476	40 x 11	D	16 q24	long intergenic non-protein coding RNA 2188 [Source:HGNC Symbol;Acc:HGNC:53050]
49	ENSG00000088002	SULT2B1	-2.81982	-0.641687	-4.6268	0.000101932	0.0590503	0.04783	13 x 40		19 q13	sulfotransferase family 2B member 1 [Source:HGNC Symbol;Acc:HGNC:11459]
50	ENSG00000101311	FERMT1	2.35667	1.7236	4.6884	0.000107242	0.0590503	0.0482843	11 x 5		20 p12	fermitin family member 1 [Source:HGNC Symbol;Acc:HGNC:15889]
51	ENSG00000118729	CASQ2	-1.35071	-0.500499	-4.62797	0.000109247	0.0590503	0.0484463	13 x 1		1 p13	calsequestrin 2 [Source:HGNC Symbol;Acc:HGNC:1513]
52	ENSG00000260710		-2.37234	-0.643176	-5.10927	0.000111309	0.0590503	0.0486081	8 x 39	K	16 p13
53	ENSG00000264491		-1.23127	-0.470554	-4.72514	0.000113955	0.0590503	0.0488085	8 x 18		17 q24
54	ENSG00000166225	FRS2	-1.00987	-0.407704	-4.57339	0.000117265	0.0590503	0.0490486	1 x 17		12 q15	fibroblast growth factor receptor substrate 2 [Source:HGNC Symbol;Acc:HGNC:16971]
55	ENSG00000268225		-1.14244	-0.446484	-4.89976	0.000118203	0.0590503	0.0491146	1 x 20		19 q13
56	ENSG00000227036	LINC00511	2.52466	1.88773	4.67553	0.000126776	0.0590503	0.0496799	40 x 16	C	17 q24	long intergenic non-protein coding RNA 511 [Source:HGNC Symbol;Acc:HGNC:43564]
57	ENSG00000145916	RMND5B	-1.02011	-0.410818	-4.57731	0.000128469	0.0590503	0.049784	17 x 39		5 q35	required for meiotic nuclear division 5 homolog B [Source:HGNC Symbol;Acc:HGNC:26181]
58	ENSG00000111728	ST8SIA1	1.82163	1.23742	4.54861	0.000133408	0.0590503	0.0500749	29 x 1		12 p12	ST8 alpha-N-acetyl-neuraminide alpha-2,8-sialyltransferase 1 [Source:HGNC Symbol;Acc:HGNC:10869]
59	ENSG00000229124	VIM-AS1	1.83396	1.248	4.53396	0.00013377	0.0590503	0.0500955	21 x 25		10 p13	VIM antisense RNA 1 [Source:HGNC Symbol;Acc:HGNC:44879]
60	ENSG00000132749	TESMIN	-1.32384	-0.494004	-4.55411	0.000134582	0.0590503	0.0501414	7 x 34		11 q13	testis expressed metallothionein like protein [Source:HGNC Symbol;Acc:HGNC:7446]
61	ENSG00000141582	CBX4	-1.09466	-0.432901	-4.56224	0.000136523	0.0590503	0.0502492	19 x 16		17 q25	chromobox 4 [Source:HGNC Symbol;Acc:HGNC:1554]
62	ENSG00000185630	PBX1	-1.4176	-0.516056	-4.52165	0.000140543	0.0590503	0.0504643	1 x 18		1 q23	PBX homeobox 1 [Source:HGNC Symbol;Acc:HGNC:8632]
63	ENSG00000144278	GALNT13	2.97482	2.35466	4.62663	0.000149883	0.0590503	0.0509257	31 x 23	B	2 q23	polypeptide N-acetylgalactosaminyltransferase 13 [Source:HGNC Symbol;Acc:HGNC:23242]
64	ENSG00000179023	KLHDC7A	-3.44971	-0.573544	-4.45664	0.00015239	0.0590503	0.0510413	8 x 40	K	1 p36	kelch domain containing 7A [Source:HGNC Symbol;Acc:HGNC:26791]
65	ENSG00000124249	KCNK15	-3.26883	-0.601017	-4.6969	0.000155522	0.0590503	0.051181	12 x 40	K	20 q13	potassium two pore domain channel subfamily K member 15 [Source:HGNC Symbol;Acc:HGNC:13814]
66	ENSG00000176855		-0.797393	-0.338411	-4.41882	0.000168435	0.0590503	0.0517093	16 x 39		1 q25	keratin 18 pseudogene 28 [Source:HGNC Symbol;Acc:HGNC:33397]
67	ENSG00000124243	BCAS4	-1.99441	-0.614073	-4.48455	0.000170783	0.0590503	0.0517979	3 x 35		20 q13	breast carcinoma amplified sequence 4 [Source:HGNC Symbol;Acc:HGNC:14367]
68	ENSG00000101040	ZMYND8	-0.806222	-0.341466	-4.4654	0.000172127	0.0590503	0.0518476	1 x 20		20 q13	zinc finger MYND-type containing 8 [Source:HGNC Symbol;Acc:HGNC:9397]
69	ENSG00000262919	FAM58A	0.693356	0.394856	4.41987	0.000175379	0.0590503	0.0519651	39 x 35		X q28	family with sequence similarity 58 member A [Source:HGNC Symbol;Acc:HGNC:28434]
70	ENSG00000278918		-1.37903	-0.507192	-4.46289	0.000175805	0.0590503	0.0519803	4 x 23		17 q21
71	ENSG00000159461	AMFR	-0.925446	-0.381223	-4.42116	0.000178869	0.0590503	0.0520871	16 x 38		16 q13	autocrine motility factor receptor [Source:HGNC Symbol;Acc:HGNC:463]
72	ENSG00000139865	TTC6	-2.50534	-0.646804	-4.39458	0.000179788	0.0590503	0.0521185	5 x 36		14 q21	tetratricopeptide repeat domain 6 [Source:HGNC Symbol;Acc:HGNC:19739]
73	ENSG00000265688	MAFG-AS1	-1.37095	-0.505297	-4.4041	0.000180301	0.0590503	0.0521359	31 x 31		17 q25	MAFG antisense RNA 1 (head to head) [Source:HGNC Symbol;Acc:HGNC:43649]
74	ENSG00000280068		-0.997848	-0.404016	-4.76727	0.000182799	0.0590503	0.0522195	21 x 35		5 q35
75	ENSG00000263718	LOC105371907	-0.862707	-0.360647	-4.4683	0.00018304	0.0590503	0.0522274	15 x 35		17 q25
76	ENSG00000253276	CCDC71L	1.24009	0.772203	4.69556	0.000183498	0.0590503	0.0522425	38 x 11		7 q22	coiled-coil domain containing 71 like [Source:HGNC Symbol;Acc:HGNC:26685]
77	ENSG00000100221	JOSD1	0.691291	0.393541	4.72321	0.000186349	0.0590503	0.0523348	34 x 14		22 q13	Josephin domain containing 1 [Source:HGNC Symbol;Acc:HGNC:28953]
78	ENSG00000160180	TFF3	-4.55991	-0.265424	-4.36826	0.000194014	0.0590503	0.052571	7 x 40	K	21 q22	trefoil factor 3 [Source:HGNC Symbol;Acc:HGNC:11757]
79	ENSG00000069764	PLA2G10	-1.28268	-0.483784	-4.60845	0.000198183	0.0590503	0.0526926	10 x 37		16 p13	phospholipase A2 group X [Source:HGNC Symbol;Acc:HGNC:9029]
80	ENSG00000115648	MLPH	-2.78741	-0.643105	-4.35889	0.000198216	0.0590503	0.0526935	10 x 40	K	2 q37	melanophilin [Source:HGNC Symbol;Acc:HGNC:29643]
81	ENSG00000152359	POC5	-0.724472	-0.312605	-4.35446	0.000202987	0.0590503	0.0528272	1 x 17		5 q13	POC5 centriolar protein [Source:HGNC Symbol;Acc:HGNC:26658]
82	ENSG00000228629		0.507325	0.279729	4.5625	0.00020507	0.0590503	0.0528838	11 x 14		19 q13
83	ENSG00000234949	LOC105373958	-1.12756	-0.4423	-4.34663	0.000206138	0.0590503	0.0529125	15 x 40		2 q37
84	ENSG00000078018	MAP2	2.3203	1.68878	4.54047	0.000211448	0.0590503	0.0530509	32 x 23	B	2 q34	microtubule associated protein 2 [Source:HGNC Symbol;Acc:HGNC:6839]
85	ENSG00000108375	RNF43	-1.68219	-0.569058	-4.33628	0.000212085	0.0590503	0.0530671	1 x 21		17 q22	ring finger protein 43 [Source:HGNC Symbol;Acc:HGNC:18505]
86	ENSG00000124151	NCOA3	-0.863018	-0.36075	-4.4172	0.000213845	0.0590503	0.0531114	1 x 9	I	20 q13	nuclear receptor coactivator 3 [Source:HGNC Symbol;Acc:HGNC:7670]
87	ENSG00000141424	SLC39A6	-2.5212	-0.647007	-4.47327	0.000214065	0.0590503	0.0531169	1 x 18		18 q12	solute carrier family 39 member 6 [Source:HGNC Symbol;Acc:HGNC:18607]
88	ENSG00000168517	HEXIM2	-0.886207	-0.368444	-4.34112	0.000214856	0.0590503	0.0531366	6 x 33		17 q21	hexamethylene bisacetamide inducible 2 [Source:HGNC Symbol;Acc:HGNC:28591]
89	ENSG00000226101	LINC02097	0.688516	0.391775	4.45534	0.000215854	0.0590503	0.0531612	19 x 24		17 q24	long intergenic non-protein coding RNA 2097 [Source:HGNC Symbol;Acc:HGNC:52948]
90	ENSG00000110693	SOX6	2.52585	1.88892	4.32419	0.000216162	0.0590503	0.0531687	30 x 24	B	11 p15	SRY-box 6 [Source:HGNC Symbol;Acc:HGNC:16421]
91	ENSG00000164219	PGGT1B	-0.646171	-0.283743	-4.3372	0.000219888	0.0590503	0.0532586	1 x 15	I	5 q22	protein geranylgeranyltransferase type I subunit beta [Source:HGNC Symbol;Acc:HGNC:8895]
92	ENSG00000155545	MIER3	-0.615869	-0.272254	-4.37118	0.000221013	0.0590503	0.0532852	1 x 15	I	5 q11	MIER family member 3 [Source:HGNC Symbol;Acc:HGNC:26678]
93	ENSG00000162989	KCNJ3	-5.03483	-0.0603503	-4.76009	0.000221938	0.0590503	0.0533069	6 x 35		2 q24	potassium voltage-gated channel subfamily J member 3 [Source:HGNC Symbol;Acc:HGNC:6264]
94	ENSG00000172602	RND1	-2.22852	-0.635378	-4.30748	0.000224217	0.0590503	0.0533597	7 x 37		12 q13	Rho family GTPase 1 [Source:HGNC Symbol;Acc:HGNC:18314]
95	ENSG00000135452	TSPAN31	-0.988538	-0.401143	-4.48544	0.000225801	0.0590503	0.0533958	17 x 39		12 q14	tetraspanin 31 [Source:HGNC Symbol;Acc:HGNC:10539]
96	ENSG00000237499	LOC100130476	0.844074	0.493069	4.31369	0.000228503	0.0590503	0.0534563	34 x 8		6 q23
97	ENSG00000115963	RND3	1.20672	0.747502	4.35315	0.000230096	0.0590503	0.0534914	12 x 6		2 q23	Rho family GTPase 3 [Source:HGNC Symbol;Acc:HGNC:671]
98	ENSG00000263325		-0.768441	-0.328289	-4.40911	0.000231555	0.0590503	0.0535231	13 x 36		16 p13
99	ENSG00000173335	CST9	-3.209	-0.608703	-4.686	0.000232089	0.0590503	0.0535347	5 x 37		20 p11	cystatin 9 [Source:HGNC Symbol;Acc:HGNC:13261]
100	ENSG00000144354	CDCA7	2.79592	2.16437	4.3097	0.000232912	0.0615523	0.0535523	40 x 24	C	2 q31	cell division cycle associated 7 [Source:HGNC Symbol;Acc:HGNC:14628]
101	ENSG00000181467	RAP2B	0.727851	0.416944	4.28179	0.000240442	0.0615523	0.0537712	36 x 10		3 q25	RAP2B, member of RAS oncogene family [Source:HGNC Symbol;Acc:HGNC:9862]
102	ENSG00000166780	C16orf45	-1.76178	-0.582335	-4.30481	0.000243958	0.0615523	0.0538694	2 x 1		16 p13	chromosome 16 open reading frame 45 [Source:HGNC Symbol;Acc:HGNC:19213]
103	ENSG00000172817	CYP7B1	1.20032	0.742788	4.30718	0.000253609	0.0615523	0.0541264	28 x 1		8 q12	cytochrome P450 family 7 subfamily B member 1 [Source:HGNC Symbol;Acc:HGNC:2652]
104	ENSG00000140284	SLC27A2	-2.5932	-0.647313	-4.41977	0.000254974	0.0615523	0.0541614	6 x 39	K	15 q21	solute carrier family 27 member 2 [Source:HGNC Symbol;Acc:HGNC:10996]
105	ENSG00000230393		-2.1959	-0.633049	-4.31165	0.000255135	0.0615523	0.0541655	3 x 35		2 q11
106	ENSG00000260284		-2.01156	-0.615995	-4.67749	0.000255322	0.0615523	0.0541703	8 x 36		16 p13	tryptase pseudogene 2 [Source:HGNC Symbol;Acc:HGNC:14136]
107	ENSG00000280053		0.638099	0.359956	4.27003	0.000257863	0.0615523	0.0542344	17 x 24		3 q21
108	ENSG00000204147	ASAH2B	-0.963094	-0.393203	-4.25756	0.0002606	0.0615523	0.0543022	21 x 34		10 q11	N-acylsphingosine amidohydrolase 2B [Source:HGNC Symbol;Acc:HGNC:23456]
109	ENSG00000275710		-0.847297	-0.355475	-4.27083	0.000260716	0.0615523	0.054305	13 x 33		17 q22
110	ENSG00000157703	SVOPL	1.51552	0.984334	4.28041	0.000263295	0.0615523	0.0543677	40 x 14	D	7 q34	SVOP like [Source:HGNC Symbol;Acc:HGNC:27034]
111	ENSG00000174206	C12orf66	-0.796606	-0.338138	-4.35013	0.000268664	0.0615523	0.0544948	1 x 16	I	12 q14	chromosome 12 open reading frame 66 [Source:HGNC Symbol;Acc:HGNC:26517]
112	ENSG00000102362	SYTL4	-1.48091	-0.529978	-4.29751	0.000271001	0.0615523	0.0545488	1 x 2	H	X q22	synaptotagmin like 4 [Source:HGNC Symbol;Acc:HGNC:15588]
113	ENSG00000175866	BAIAP2	-1.46744	-0.527082	-4.24672	0.000275589	0.0615523	0.0546523	22 x 14		17 q25	BAI1 associated protein 2 [Source:HGNC Symbol;Acc:HGNC:947]
114	ENSG00000105388	CEACAM5	-4.05577	-0.435077	-4.30922	0.000276544	0.0615523	0.0546735	9 x 40	K	19 q13	carcinoembryonic antigen related cell adhesion molecule 5 [Source:HGNC Symbol;Acc:HGNC:1817]
115	ENSG00000002834	LASP1	-1.10374	-0.435515	-4.23848	0.000278294	0.0615523	0.0547119	1 x 6	H	17 q12	LIM and SH3 protein 1 [Source:HGNC Symbol;Acc:HGNC:6513]
116	ENSG00000135392	DNAJC14	-0.723022	-0.312082	-4.23509	0.000278403	0.0615523	0.0547143	1 x 8	H	12 q13	DnaJ heat shock protein family (Hsp40) member C14 [Source:HGNC Symbol;Acc:HGNC:24581]
117	ENSG00000174788	PCP2	-1.82091	-0.591401	-4.31092	0.000281519	0.0615523	0.0547817	5 x 29		19 p13	Purkinje cell protein 2 [Source:HGNC Symbol;Acc:HGNC:30209]
118	ENSG00000235545		0.819758	0.476925	4.39557	0.000284819	0.0615523	0.0548516	22 x 24		1 p31
119	ENSG00000129518	EAPP	-0.685693	-0.298461	-4.2362	0.000286354	0.0615523	0.0548836	20 x 40		14 q13	E2F associated phosphoprotein [Source:HGNC Symbol;Acc:HGNC:19312]
120	ENSG00000011143	MKS1	-0.756714	-0.324143	-4.31898	0.000286453	0.0689333	0.0548857	4 x 32		17 q22	Meckel syndrome, type 1 [Source:HGNC Symbol;Acc:HGNC:7121]
121	ENSG00000275759		-0.597156	-0.265069	-4.22046	0.000290091	0.0689333	0.0550263	12 x 31		12 q24
122	ENSG00000182791	CCDC87	-1.36567	-0.504053	-4.21101	0.000297322	0.0689333	0.0552976	4 x 37		11 q13	coiled-coil domain containing 87 [Source:HGNC Symbol;Acc:HGNC:25579]
123	ENSG00000182531		0.666505	0.377823	4.42284	0.00029831	0.0689333	0.0553338	19 x 29		10 p13	olfactory receptor family 7 subfamily E member 115 pseudogene [Source:HGNC Symbol;Acc:HGNC:15127]
124	ENSG00000124171	PARD6B	-1.65493	-0.564227	-4.24224	0.000300405	0.0689333	0.0554101	6 x 34		20 q13	par-6 family cell polarity regulator beta [Source:HGNC Symbol;Acc:HGNC:16245]
125	ENSG00000117153	KLHL12	-0.728522	-0.314066	-4.26487	0.000304557	0.0689333	0.0555587	1 x 16	I	1 q32	kelch like family member 12 [Source:HGNC Symbol;Acc:HGNC:19360]
126	ENSG00000278908		-0.793237	-0.336968	-4.2085	0.000307274	0.0689333	0.0556542	1 x 24		2 p23
127	ENSG00000145022	TCTA	-0.857788	-0.359001	-4.20325	0.00030744	0.0871641	0.0556599	16 x 40		3 p21	T-cell leukemia translocation altered [Source:HGNC Symbol;Acc:HGNC:11692]
128	ENSG00000131759	RARA	-1.59781	-0.553635	-4.17919	0.000313728	0.0871641	0.0560661	11 x 38		17 q21	retinoic acid receptor alpha [Source:HGNC Symbol;Acc:HGNC:9864]
129	ENSG00000170921	TANC2	-1.76996	-0.58363	-4.2791	0.000315283	0.0871641	0.0561649	1 x 6	H	17 q23	tetratricopeptide repeat, ankyrin repeat and coiled-coil containing 2 [Source:HGNC Symbol;Acc:HGNC:30212]
130	ENSG00000156150	ALX3	1.7429	1.17059	4.45671	0.000319601	0.0871641	0.0564361	29 x 25		1 p13	ALX homeobox 3 [Source:HGNC Symbol;Acc:HGNC:449]
131	ENSG00000202522		-0.878947	-0.366046	-4.21417	0.000326388	0.0871641	0.0568529	5 x 19		11 q13	Y RNA [Source:RFAM;Acc:RF00019]
132	ENSG00000144218	AFF3	-3.07473	-0.623414	-4.199	0.00032936	0.0871641	0.0570318	1 x 1		2 q11	AF4/FMR2 family member 3 [Source:HGNC Symbol;Acc:HGNC:6473]
133	ENSG00000107954	NEURL1	-2.55257	-0.647264	-4.15736	0.00033372	0.0871641	0.0572906	1 x 35		10 q24	neuralized E3 ubiquitin protein ligase 1 [Source:HGNC Symbol;Acc:HGNC:7761]
134	ENSG00000121964	GTDC1	0.797074	0.461968	4.18204	0.000335021	0.0871641	0.0573669	34 x 19		2 q22	glycosyltransferase like domain containing 1 [Source:HGNC Symbol;Acc:HGNC:20887]
135	ENSG00000224559	LINC01087	-2.86884	-0.639156	-4.25749	0.000353968	0.0871641	0.0584362	6 x 35		2 q21	long intergenic non-protein coding RNA 1087 [Source:HGNC Symbol;Acc:HGNC:49144]
136	ENSG00000171345	KRT19	-1.70344	-0.572723	-4.11899	0.000364799	0.0871641	0.0590137	14 x 40		17 q21	keratin 19 [Source:HGNC Symbol;Acc:HGNC:6436]
137	ENSG00000197320		0.966253	0.57593	4.22795	0.000366095	0.0871641	0.0590813	26 x 23		7 p21
138	ENSG00000005302	MSL3	0.772512	0.445885	4.12496	0.000368102	0.0871641	0.0591852	35 x 18		X p22	MSL complex subunit 3 [Source:HGNC Symbol;Acc:HGNC:7370]
139	ENSG00000259964		-0.762846	-0.326315	-4.31646	0.000370768	0.0871641	0.0593221	1 x 25		15 q23	THSD4 antisense RNA 1 [Source:HGNC Symbol;Acc:HGNC:51420]
140	ENSG00000260394	LOC105371184	-0.658121	-0.288225	-4.1391	0.00037272	0.0871641	0.0594215	7 x 32		16 p13
141	ENSG00000277972	CISD3	-1.22728	-0.469507	-4.10974	0.000377486	0.0871641	0.0596613	40 x 38		17 q12	CDGSH iron sulfur domain 3 [Source:HGNC Symbol;Acc:HGNC:27578]
142	ENSG00000223813		-1.73897	-0.578655	-4.1177	0.000377505	0.0871641	0.0596622	9 x 40	K	7 p14
143	ENSG00000232724		-0.646971	-0.284044	-4.1156	0.000378849	0.0871641	0.0597291	16 x 36		17 q25	tripartite motif containing 80, pseudogene [Source:HGNC Symbol;Acc:HGNC:51490]
144	ENSG00000187720	THSD4	-2.61464	-0.647209	-4.10379	0.000379699	0.0871641	0.0597712	9 x 40	K	15 q23	thrombospondin type 1 domain containing 4 [Source:HGNC Symbol;Acc:HGNC:25835]
145	ENSG00000267534	S1PR2	0.896141	0.528025	4.16283	0.000387502	0.0871641	0.0601519	36 x 21	C	19 p13	sphingosine-1-phosphate receptor 2 [Source:HGNC Symbol;Acc:HGNC:3169]
146	ENSG00000178951	ZBTB7A	-0.835535	-0.351497	-4.11484	0.000393466	0.0871641	0.0604358	13 x 37		19 p13	zinc finger and BTB domain containing 7A [Source:HGNC Symbol;Acc:HGNC:18078]
147	ENSG00000160182	TFF1	-4.75202	-0.187758	-4.23071	0.000398274	0.0871641	0.0606603	7 x 40	K	21 q22	trefoil factor 1 [Source:HGNC Symbol;Acc:HGNC:11755]
148	ENSG00000237176		0.416772	0.226127	4.1115	0.000400057	0.0871641	0.0607426	27 x 37		12 q14
149	ENSG00000270933		1.55087	1.01263	4.11422	0.000403461	0.0871641	0.0608984	10 x 27		7 p15
150	ENSG00000181045	SLC26A11	-1.0831	-0.429546	-4.09045	0.000404053	0.0871641	0.0609252	23 x 16		17 q25	solute carrier family 26 member 11 [Source:HGNC Symbol;Acc:HGNC:14471]
151	ENSG00000106927	AMBP	-1.81693	-0.590812	-4.42653	0.000406091	0.0871641	0.0610174	7 x 36		9 q32	alpha-1-microglobulin/bikunin precursor [Source:HGNC Symbol;Acc:HGNC:453]
152	ENSG00000068724	TTC7A	0.756526	0.435482	4.07479	0.000415592	0.0871641	0.0614388	40 x 16	C	2 p21	tetratricopeptide repeat domain 7A [Source:HGNC Symbol;Acc:HGNC:19750]
153	ENSG00000233654		0.860727	0.504192	4.44067	0.00041795	0.0871641	0.0615413	19 x 26		2 q32
154	ENSG00000162458	FBLIM1	0.918925	0.543488	4.09822	0.000418047	0.0871641	0.0615455	19 x 7		1 p36	filamin binding LIM protein 1 [Source:HGNC Symbol;Acc:HGNC:24686]
155	ENSG00000265136		-0.571296	-0.255028	-4.07707	0.000423953	0.0871641	0.0617985	12 x 20		17 q25
156	ENSG00000197191	CYSRT1	-1.39789	-0.511564	-4.15595	0.000425425	0.0871641	0.0618608	15 x 40		9 q34	cysteine rich tail 1 [Source:HGNC Symbol;Acc:HGNC:30529]
157	ENSG00000115604	IL18R1	1.33841	0.846231	4.19485	0.00042596	0.0871641	0.0618833	14 x 5		2 q12	interleukin 18 receptor 1 [Source:HGNC Symbol;Acc:HGNC:5988]
158	ENSG00000106829	TLE4	0.952005	0.566118	4.05537	0.00043115	0.0871641	0.0621002	29 x 1		9 q21	transducin like enhancer of split 4 [Source:HGNC Symbol;Acc:HGNC:11840]
159	ENSG00000115271	GCA	0.848059	0.495726	4.16532	0.000432631	0.0871641	0.0621613	33 x 17		2 q24	grancalcin [Source:HGNC Symbol;Acc:HGNC:15990]
160	ENSG00000153060	TEKT5	-1.22319	-0.468428	-4.0527	0.000433895	0.0871641	0.0622133	8 x 35		16 p13	tektin 5 [Source:HGNC Symbol;Acc:HGNC:26554]
161	ENSG00000152558	TMEM123	1.46951	0.947873	4.04292	0.000444736	0.0871641	0.0626505	37 x 17		11 q22	transmembrane protein 123 [Source:HGNC Symbol;Acc:HGNC:30138]
162	ENSG00000181617	FDCSP	5.11681	5.11681	4.3631	0.000452311	0.0871641	0.0629469	38 x 4	E	4 q13	follicular dendritic cell secreted protein [Source:HGNC Symbol;Acc:HGNC:19215]
163	ENSG00000155760	FZD7	1.29439	0.812853	4.07191	0.00046469	0.0871641	0.0634163	11 x 4		2 q33	frizzled class receptor 7 [Source:HGNC Symbol;Acc:HGNC:4045]
164	ENSG00000261324		-1.91975	-0.605034	-4.1092	0.000467285	0.0871641	0.0635124	5 x 25		12 p12
165	ENSG00000108039	XPNPEP1	0.665845	0.377406	4.01751	0.0004738	0.0871641	0.0637503	25 x 20		10 q25	X-prolyl aminopeptidase 1 [Source:HGNC Symbol;Acc:HGNC:12822]
166	ENSG00000257261		-0.995711	-0.403358	-4.03485	0.000481987	0.0871641	0.0640425	18 x 40		12 q13
167	ENSG00000232872		-0.71026	-0.307456	-3.99761	0.000499667	0.0871641	0.0646493	2 x 21		13 q14	CTAGE family member 3, pseudogene [Source:HGNC Symbol;Acc:HGNC:24348]
168	ENSG00000246705		-1.74463	-0.579578	-4.17911	0.000499726	0.0871641	0.0646513	40 x 39		12 p12	H2A histone family member J [Source:HGNC Symbol;Acc:HGNC:14456]
169	ENSG00000150667	FSIP1	-3.07379	-0.623504	-4.12752	0.000503846	0.0871641	0.0647881	4 x 38		15 q14	fibrous sheath interacting protein 1 [Source:HGNC Symbol;Acc:HGNC:21674]
170	ENSG00000102882	MAPK3	-0.906758	-0.375174	-4.0294	0.000517624	0.0871641	0.0652338	16 x 40		16 p11	mitogen-activated protein kinase 3 [Source:HGNC Symbol;Acc:HGNC:6877]
171	ENSG00000157653	C9orf43	-0.882292	-0.367152	-4.03072	0.000522732	0.0871641	0.0653946	18 x 37		9 q32	chromosome 9 open reading frame 43 [Source:HGNC Symbol;Acc:HGNC:23570]
172	ENSG00000274922		1.14311	0.701024	4.00601	0.000522846	0.0871641	0.0653982	37 x 14		13 q34
173	ENSG00000254006		0.726579	0.416125	4.08497	0.000523696	0.0871641	0.0654247	35 x 19		8 q12
174	ENSG00000092621	PHGDH	2.09877	1.48229	3.97914	0.000524973	0.0871641	0.0654644	34 x 26	B	1 p12	phosphoglycerate dehydrogenase [Source:HGNC Symbol;Acc:HGNC:8923]
175	ENSG00000244558		-1.2357	-0.471715	-3.97743	0.000536641	0.0871641	0.0658207	4 x 33		20 q13	KCNK15 antisense RNA 1 (head to head) [Source:HGNC Symbol;Acc:HGNC:49901]
176	ENSG00000152154	TMEM178A	-1.11727	-0.439384	-3.99349	0.000541997	0.0871641	0.0659803	9 x 1		2 p22	transmembrane protein 178A [Source:HGNC Symbol;Acc:HGNC:28517]
177	ENSG00000128218	VPREB3	1.07434	0.65166	4.41797	0.000548102	0.0871641	0.0661594	36 x 10		22 q11	V-set pre-B cell surrogate light chain 3 [Source:HGNC Symbol;Acc:HGNC:12710]
178	ENSG00000235885	LOC101927661	0.434048	0.23623	4.16523	0.000551105	0.0871641	0.0662464	12 x 13		2 p14	long intergenic non-protein coding RNA 1828 [Source:HGNC Symbol;Acc:HGNC:52634]
179	ENSG00000117479	SLC19A2	-1.44432	-0.522027	-4.13581	0.000554278	0.0871641	0.0663376	1 x 17		1 q24	solute carrier family 19 member 2 [Source:HGNC Symbol;Acc:HGNC:10938]
180	ENSG00000163975	MELTF	2.57209	1.93507	4.01097	0.000556153	0.0871641	0.066391	40 x 18	C	3 q29	melanotransferrin [Source:HGNC Symbol;Acc:HGNC:7037]
181	ENSG00000141337	ARSG	-1.49247	-0.532436	-3.95524	0.00055967	0.0871641	0.0664906	1 x 17		17 q24	arylsulfatase G [Source:HGNC Symbol;Acc:HGNC:24102]
182	ENSG00000261664		-1.6173	-0.557321	-3.95424	0.000561202	0.0871641	0.0665337	9 x 40	K	1 p32	TTC39A antisense RNA 1 [Source:HGNC Symbol;Acc:HGNC:40851]
183	ENSG00000173559	NABP1	1.16602	0.717672	4.01495	0.000566968	0.0871641	0.0666942	34 x 8		2 q32	nucleic acid binding protein 1 [Source:HGNC Symbol;Acc:HGNC:26232]
184	ENSG00000267503		-1.1121	-0.437911	-4.19276	0.000567589	0.0871641	0.0667114	12 x 33		18 p11
185	ENSG00000141551	CSNK1D	-0.602528	-0.267138	-3.94681	0.00056805	0.0871641	0.0667241	23 x 15		17 q25	casein kinase 1 delta [Source:HGNC Symbol;Acc:HGNC:2452]
186	ENSG00000143320	CRABP2	-2.52372	-0.647035	-3.94207	0.000577225	0.0871641	0.0669737	16 x 40		1 q23	cellular retinoic acid binding protein 2 [Source:HGNC Symbol;Acc:HGNC:2339]
187	ENSG00000186765	FSCN2	-0.916504	-0.378337	-3.98747	0.00057788	0.0871641	0.0669913	4 x 24		17 q25	fascin actin-bundling protein 2, retinal [Source:HGNC Symbol;Acc:HGNC:3960]
188	ENSG00000267092		-0.510228	-0.230799	-3.97089	0.000578473	0.0871641	0.0670072	13 x 35		19 p13
189	ENSG00000257453		0.526639	0.291368	4.20376	0.000582558	0.0871641	0.067116	16 x 13		12 q21
190	ENSG00000279427		-1.3484	-0.499946	-3.94046	0.000585628	0.0871641	0.0671971	7 x 38	K	16 q12
191	ENSG00000152137	HSPB8	-2.18059	-0.631884	-3.96422	0.000594277	0.0871641	0.0674218	1 x 2	H	12 q24	heat shock protein family B (small) member 8 [Source:HGNC Symbol;Acc:HGNC:30171]
192	ENSG00000130881	LRP3	0.81361	0.472861	3.93305	0.000594472	0.0871641	0.0674268	20 x 12		19 q13	LDL receptor related protein 3 [Source:HGNC Symbol;Acc:HGNC:6695]
193	ENSG00000255367	LOC101927708	-1.13014	-0.443029	-3.97916	0.000595968	0.0871641	0.0674652	8 x 36		11 p15
194	ENSG00000198947	DMD	1.4265	0.914158	3.92764	0.000597126	0.0871641	0.0674948	12 x 4		X p21	dystrophin [Source:HGNC Symbol;Acc:HGNC:2928]
195	ENSG00000109618	SEPSECS	-0.673293	-0.293876	-3.9321	0.000597478	0.0871641	0.0675037	1 x 17		4 p15	Sep (O-phosphoserine) tRNA:Sec (selenocysteine) tRNA synthase [Source:HGNC Symbol;Acc:HGNC:30605]
196	ENSG00000165071	TMEM71	1.97634	1.37227	3.99975	0.000598168	0.0871641	0.0675213	40 x 10	D	8 q24	transmembrane protein 71 [Source:HGNC Symbol;Acc:HGNC:26572]
197	ENSG00000174951	FUT1	-1.34743	-0.499714	-3.97432	0.000599691	0.0871641	0.06756	25 x 15		19 q13	fucosyltransferase 1 (H blood group) [Source:HGNC Symbol;Acc:HGNC:4012]
198	ENSG00000186431	FCAR	0.72653	0.416094	3.9174	0.000612546	0.0871641	0.0678804	30 x 6		19 q13	Fc fragment of IgA receptor [Source:HGNC Symbol;Acc:HGNC:3608]
199	ENSG00000244274	DBNDD2	-1.20076	-0.46246	-3.96179	0.000620906	0.0871641	0.0680832	6 x 33		20 q13	dysbindin domain containing 2 [Source:HGNC Symbol;Acc:HGNC:15881]
200	ENSG00000230946		0.389274	0.210165	3.96295	0.000620994	0.0871641	0.0680853	13 x 20		1 p21	heterogeneous nuclear ribonucleoprotein A1 pseudogene 68 [Source:HGNC Symbol;Acc:HGNC:48798]
201	ENSG00000281406		2.37078	1.73717	4.16255	0.000621976	0.0871641	0.0681088	23 x 24		1 q32	bladder cancer associated transcript 1 (non-protein coding) [Source:HGNC Symbol;Acc:HGNC:48597]
202	ENSG00000152256	PDK1	1.46775	0.94648	3.91427	0.000623754	0.0871641	0.0681513	36 x 24	B	2 q31	pyruvate dehydrogenase kinase 1 [Source:HGNC Symbol;Acc:HGNC:8809]
203	ENSG00000154548	SRSF12	2.13073	1.51149	3.9841	0.000624757	0.0871641	0.0681752	33 x 24	B	6 q15	serine and arginine rich splicing factor 12 [Source:HGNC Symbol;Acc:HGNC:21220]
204	ENSG00000134533	RERG	-2.0947	-0.624505	-4.01015	0.000626968	0.0871641	0.0682276	5 x 38		12 p12	RAS like estrogen regulated growth inhibitor [Source:HGNC Symbol;Acc:HGNC:15980]
205	ENSG00000235437	LINC01278	0.684331	0.389115	4.00857	0.000631607	0.0871641	0.0683366	20 x 31		X q11	long intergenic non-protein coding RNA 1278 [Source:HGNC Symbol;Acc:HGNC:28090]
206	ENSG00000166959	MS4A8	-2.27453	-0.638311	-4.14712	0.000631645	0.0871641	0.0683375	1 x 38		11 q12	membrane spanning 4-domains A8 [Source:HGNC Symbol;Acc:HGNC:13380]
207	ENSG00000182575	NXPH3	-1.93494	-0.606961	-3.96277	0.00063251	0.0871641	0.0683577	1 x 1		17 q21	neurexophilin 3 [Source:HGNC Symbol;Acc:HGNC:8077]
208	ENSG00000273209		1.24198	0.773607	4.11859	0.000636851	0.0871641	0.0684584	22 x 25		2 q33
209	ENSG00000226137	BAIAP2-AS1	-1.03183	-0.414362	-4.03069	0.000640178	0.0871641	0.0685348	1 x 23		17 q25	BAIAP2 antisense RNA 1 (head to head) [Source:HGNC Symbol;Acc:HGNC:44342]
210	ENSG00000164626	KCNK5	2.17884	1.55582	3.97191	0.00064054	0.0871641	0.0685431	21 x 22		6 p21	potassium two pore domain channel subfamily K member 5 [Source:HGNC Symbol;Acc:HGNC:6280]
211	ENSG00000184675	AMER1	1.0003	0.599536	3.89949	0.000641086	0.0871641	0.0685556	25 x 21		X q11	APC membrane recruitment protein 1 [Source:HGNC Symbol;Acc:HGNC:26837]
212	ENSG00000169372	CRADD	-0.663479	-0.290226	-4.00341	0.000645563	0.0871641	0.0686572	19 x 39		12 q22	CASP2 and RIPK1 domain containing adaptor with death domain [Source:HGNC Symbol;Acc:HGNC:2340]
213	ENSG00000239305	RNF103	-0.906704	-0.375156	-3.95403	0.000650727	0.0871641	0.0687731	1 x 14	I	2 p11	ring finger protein 103 [Source:HGNC Symbol;Acc:HGNC:12859]
214	ENSG00000174373	RALGAPA1	-0.831242	-0.350038	-3.92702	0.000657306	0.0871641	0.0689187	1 x 19		14 q13	Ral GTPase activating protein catalytic alpha subunit 1 [Source:HGNC Symbol;Acc:HGNC:17770]
215	ENSG00000279066		-0.612312	-0.270893	-3.90318	0.000659573	0.0871641	0.0689683	8 x 24		17 q25
216	ENSG00000108932	SLC16A6	-2.85013	-0.640178	-4.15935	0.000661662	0.0871641	0.0690137	10 x 38	K	17 q24	solute carrier family 16 member 6 [Source:HGNC Symbol;Acc:HGNC:10927]
217	ENSG00000166578	IQCD	-1.17154	-0.454539	-3.8912	0.000669938	0.0871641	0.0691917	2 x 38		12 q24	IQ motif containing D [Source:HGNC Symbol;Acc:HGNC:25168]
218	ENSG00000142606	MMEL1	-1.54305	-0.542884	-3.88429	0.000671473	0.0871641	0.0692244	12 x 40	K	1 p36	membrane metalloendopeptidase like 1 [Source:HGNC Symbol;Acc:HGNC:14668]
219	ENSG00000085978	ATG16L1	-0.867859	-0.362365	-4.01522	0.000674174	0.0871641	0.0692815	2 x 15	I	2 q37	autophagy related 16 like 1 [Source:HGNC Symbol;Acc:HGNC:21498]
220	ENSG00000272810		0.636318	0.358842	3.87616	0.000680555	0.0871641	0.069415	11 x 29		6 p22
221	ENSG00000146409	SLC18B1	1.32197	0.833717	3.87558	0.000683145	0.0871641	0.0694687	35 x 19		6 q23	solute carrier family 18 member B1 [Source:HGNC Symbol;Acc:HGNC:21573]
222	ENSG00000267272	LINC01140	1.17894	0.727108	4.05444	0.000685587	0.0871641	0.0695189	24 x 26		1 p22	long intergenic non-protein coding RNA 1140 [Source:HGNC Symbol;Acc:HGNC:27922]
223	ENSG00000223783		-1.50423	-0.53491	-4.26581	0.000686752	0.0871641	0.0695428	7 x 34		3 q29	long intergenic non-protein coding RNA 1983 [Source:HGNC Symbol;Acc:HGNC:52813]
224	ENSG00000253522	MIR3142HG	1.71734	1.14915	4.17239	0.000688838	0.0871641	0.0695854	38 x 7	E	5 q33	MIR3142 host gene [Source:HGNC Symbol;Acc:HGNC:51944]
225	ENSG00000157800	SLC37A3	0.723052	0.413857	3.87294	0.000689419	0.0871641	0.0695972	32 x 17		7 q34	solute carrier family 37 member 3 [Source:HGNC Symbol;Acc:HGNC:20651]
226	ENSG00000173838	2020-03-10	-1.59655	-0.553394	-4.08585	0.000692389	0.0871641	0.0696575	1 x 36		17 q23	membrane associated ring-CH-type finger 10 [Source:HGNC Symbol;Acc:HGNC:26655]
227	ENSG00000141568	FOXK2	-0.552525	-0.247658	-3.87828	0.000692634	0.0871641	0.0696624	24 x 17		17 q25	forkhead box K2 [Source:HGNC Symbol;Acc:HGNC:6036]
228	ENSG00000158717	RNF166	0.845198	0.493818	3.95438	0.000695765	0.0871641	0.0697254	33 x 7		16 q24	ring finger protein 166 [Source:HGNC Symbol;Acc:HGNC:28856]
229	ENSG00000197889	MEIG1	1.55376	1.01495	4.13832	0.000697076	0.0871641	0.0697516	33 x 31		10 p13	meiosis/spermiogenesis associated 1 [Source:HGNC Symbol;Acc:HGNC:23429]
230	ENSG00000109062	SLC9A3R1	-2.0919	-0.624241	-3.93535	0.000697916	0.0871641	0.0697684	11 x 40	K	17 q25	SLC9A3 regulator 1 [Source:HGNC Symbol;Acc:HGNC:11075]
231	ENSG00000162738	VANGL2	1.84031	1.25346	3.99906	0.000701702	0.101086	0.0698436	29 x 24		1 q23	VANGL planar cell polarity protein 2 [Source:HGNC Symbol;Acc:HGNC:15511]
232	ENSG00000125457	MIF4GD	-1.07943	-0.428478	-3.8623	0.000706098	0.107686	0.0699783	17 x 40		17 q25	MIF4G domain containing [Source:HGNC Symbol;Acc:HGNC:24030]
233	ENSG00000280594		1.2061	0.747042	3.96986	0.000711683	0.107686	0.0701711	21 x 24		21 q21	BTG3 antisense RNA 1 [Source:HGNC Symbol;Acc:HGNC:53145]
234	ENSG00000171161	ZNF672	0.754909	0.434432	3.86053	0.000717397	0.107686	0.0703664	22 x 17		1 q44	zinc finger protein 672 [Source:HGNC Symbol;Acc:HGNC:26179]
235	ENSG00000164237	CMBL	-2.16353	-0.630533	-3.84799	0.000731428	0.107686	0.0708373	7 x 39	K	5 p15	carboxymethylenebutenolidase homolog [Source:HGNC Symbol;Acc:HGNC:25090]
236	ENSG00000110092	CCND1	-2.04597	-0.619681	-3.87339	0.00073244	0.107686	0.0708708	1 x 3	H	11 q13	cyclin D1 [Source:HGNC Symbol;Acc:HGNC:1582]
237	ENSG00000160131	VMA21	0.514193	0.283859	3.8569	0.000735369	0.107686	0.0709674	31 x 14		X q28	VMA21, vacuolar ATPase assembly factor [Source:HGNC Symbol;Acc:HGNC:22082]
238	ENSG00000165516	KLHDC2	-0.671215	-0.293105	-3.89165	0.000747597	0.107686	0.0713655	1 x 18		14 q21	kelch domain containing 2 [Source:HGNC Symbol;Acc:HGNC:20231]
239	ENSG00000186312	CA5BP1	0.978247	0.584221	3.85302	0.000748951	0.107686	0.071409	35 x 16		X p22	carbonic anhydrase 5B pseudogene 1 [Source:HGNC Symbol;Acc:HGNC:29544]
240	ENSG00000132824	SERINC3	-0.790756	-0.336105	-3.87912	0.000752376	0.107686	0.0715187	1 x 11	I	20 q13	serine incorporator 3 [Source:HGNC Symbol;Acc:HGNC:11699]
241	ENSG00000124839	RAB17	-1.14763	-0.44793	-3.84466	0.000754391	0.107686	0.0715829	11 x 40	K	2 q37	RAB17, member RAS oncogene family [Source:HGNC Symbol;Acc:HGNC:16523]
242	ENSG00000198053	SIRPA	1.11819	0.683023	3.83402	0.000758358	0.107686	0.0717087	31 x 1	F	20 p13	signal regulatory protein alpha [Source:HGNC Symbol;Acc:HGNC:9662]
243	ENSG00000161905	ALOX15	-1.87255	-0.598761	-3.84078	0.000765826	0.107686	0.071943	28 x 29		17 p13	arachidonate 15-lipoxygenase [Source:HGNC Symbol;Acc:HGNC:433]
244	ENSG00000251396		1.00348	0.601753	3.83024	0.000766038	0.107686	0.0719497	20 x 24		8 q12	long intergenic non-protein coding RNA 1301 [Source:HGNC Symbol;Acc:HGNC:50464]
245	ENSG00000176532	PRR15	-2.87944	-0.638547	-3.86495	0.000771184	0.107686	0.0721093	9 x 40	K	7 p14	proline rich 15 [Source:HGNC Symbol;Acc:HGNC:22310]
246	ENSG00000259986		-0.406795	-0.188107	-3.84235	0.000785336	0.107686	0.0725412	13 x 18		15 q25
247	ENSG00000255337	LOC101928424	0.969398	0.578102	3.83567	0.000793656	0.107686	0.0727903	19 x 25		11 q22
248	ENSG00000167608	TMC4	-1.32558	-0.49443	-3.92227	0.000795926	0.107686	0.0728576	12 x 40	K	19 q13	transmembrane channel like 4 [Source:HGNC Symbol;Acc:HGNC:22998]
249	ENSG00000268204		-1.24407	-0.473897	-3.81722	0.000802155	0.107686	0.073041	4 x 27		19 p13
250	ENSG00000135686	KLHL36	0.815102	0.473846	3.81242	0.00080233	0.107686	0.0730462	9 x 8		16 q24	kelch like family member 36 [Source:HGNC Symbol;Acc:HGNC:17844]
251	ENSG00000166908	PIP4K2C	-0.910586	-0.376419	-3.84608	0.000806173	0.107686	0.0731583	26 x 17		12 q13	phosphatidylinositol-5-phosphate 4-kinase type 2 gamma [Source:HGNC Symbol;Acc:HGNC:23786]
252	ENSG00000170919		1.06203	0.642918	3.8233	0.000811315	0.107686	0.0733073	12 x 26		13 q14	TPT1 antisense RNA 1 [Source:HGNC Symbol;Acc:HGNC:43686]
253	ENSG00000163879	DNALI1	-2.47021	-0.64618	-3.82481	0.000813309	0.107686	0.0733647	1 x 38		1 p34	dynein axonemal light intermediate chain 1 [Source:HGNC Symbol;Acc:HGNC:14353]
254	ENSG00000124942	AHNAK	-1.36076	-0.502892	-3.96721	0.000815365	0.107686	0.0734238	3 x 6	H	11 q12	AHNAK nucleoprotein [Source:HGNC Symbol;Acc:HGNC:347]
255	ENSG00000017260	ATP2C1	0.591016	0.330688	3.81036	0.000818063	0.107686	0.0735009	30 x 19		3 q22	ATPase secretory pathway Ca2+ transporting 1 [Source:HGNC Symbol;Acc:HGNC:13211]
256	ENSG00000279271		-0.550452	-0.24684	-4.01809	0.000818503	0.108249	0.0735134	13 x 35		8 p22
257	ENSG00000142515	KLK3	-1.08302	-0.429523	-3.9011	0.000825532	0.108249	0.0737148	13 x 7		19 q13	kallikrein related peptidase 3 [Source:HGNC Symbol;Acc:HGNC:6364]
258	ENSG00000115468	EFHD1	-1.99241	-0.613845	-4.03472	0.000836908	0.108249	0.0740359	1 x 1		2 q37	EF-hand domain family member D1 [Source:HGNC Symbol;Acc:HGNC:29556]
259	ENSG00000268307		-1.78752	-0.586365	-3.86107	0.00083777	0.108249	0.07406	28 x 33		19 q13	long intergenic non-protein coding RNA 2560 [Source:HGNC Symbol;Acc:HGNC:53600]
260	ENSG00000145782	ATG12	-0.519553	-0.234546	-3.81281	0.000839894	0.108249	0.0741191	14 x 34		5 q22	autophagy related 12 [Source:HGNC Symbol;Acc:HGNC:588]
261	ENSG00000114812	VIPR1	-1.27432	-0.481667	-4.00882	0.00085339	0.108249	0.0744906	9 x 38	K	3 p22	vasoactive intestinal peptide receptor 1 [Source:HGNC Symbol;Acc:HGNC:12694]
262	ENSG00000132326	PER2	-0.726997	-0.313516	-3.9046	0.000860664	0.108249	0.0746874	4 x 5	H	2 q37	period circadian clock 2 [Source:HGNC Symbol;Acc:HGNC:8846]
263	ENSG00000248429	LOC285505	-1.84149	-0.594397	-3.78402	0.000867811	0.108249	0.0748786	1 x 2	H	4 q32
264	ENSG00000131475	VPS25	-0.868949	-0.362728	-3.78419	0.000868098	0.108249	0.0748863	21 x 40		17 q21	vacuolar protein sorting 25 homolog [Source:HGNC Symbol;Acc:HGNC:28122]
265	ENSG00000143013	LMO4	1.93571	1.33641	3.783	0.000869131	0.108249	0.0749137	36 x 16		1 p22	LIM domain only 4 [Source:HGNC Symbol;Acc:HGNC:6644]
266	ENSG00000178467	P4HTM	-1.51264	-0.536662	-3.78151	0.000873124	0.108249	0.0750194	13 x 40		3 p21	prolyl 4-hydroxylase, transmembrane [Source:HGNC Symbol;Acc:HGNC:28858]
267	ENSG00000275532		-0.699597	-0.303566	-3.93775	0.000882027	0.108249	0.0752525	7 x 32		17 q12
268	ENSG00000153140	CETN3	-0.598126	-0.265443	-3.77308	0.000885615	0.108249	0.0753456	20 x 40		5 q14	centrin 3 [Source:HGNC Symbol;Acc:HGNC:1868]
269	ENSG00000139637	C12orf10	-0.80859	-0.342282	-3.8049	0.000886488	0.108249	0.0753681	35 x 38		12 q13	chromosome 12 open reading frame 10 [Source:HGNC Symbol;Acc:HGNC:17590]
270	ENSG00000181396	OGFOD3	-1.00924	-0.40751	-3.81873	0.000894293	0.108249	0.0755685	28 x 35		17 q25	2-oxoglutarate and iron dependent oxygenase domain containing 3 [Source:HGNC Symbol;Acc:HGNC:26174]
271	ENSG00000166159	LRTM2	-1.56259	-0.546787	-3.81734	0.000894435	0.108249	0.0755721	1 x 34		12 p13	leucine rich repeats and transmembrane domains 2 [Source:HGNC Symbol;Acc:HGNC:32443]
272	ENSG00000196557	CACNA1H	-3.00349	-0.629795	-3.87251	0.000895607	0.108249	0.075602	1 x 2	H	16 p13	calcium voltage-gated channel subunit alpha1 H [Source:HGNC Symbol;Acc:HGNC:1395]
273	ENSG00000236132		0.440192	0.239837	3.90872	0.000899794	0.108249	0.0757082	11 x 13		22 q12
274	ENSG00000156140	ADAMTS3	1.4615	0.941563	3.78443	0.000904765	0.108249	0.0758335	11 x 3		4 q13	ADAM metallopeptidase with thrombospondin type 1 motif 3 [Source:HGNC Symbol;Acc:HGNC:219]
275	ENSG00000006282	SPATA20	-1.31564	-0.491995	-3.75851	0.000918679	0.108249	0.076179	15 x 38		17 q21	spermatogenesis associated 20 [Source:HGNC Symbol;Acc:HGNC:26125]
276	ENSG00000163932	PRKCD	-1.13476	-0.444331	-3.76093	0.000921491	0.108249	0.0762479	14 x 40		3 p21	protein kinase C delta [Source:HGNC Symbol;Acc:HGNC:9399]
277	ENSG00000266208		-1.12508	-0.4416	-3.8405	0.000923339	0.108249	0.076293	22 x 13		17 q21
278	ENSG00000159348	CYB5R1	-1.23381	-0.471221	-3.77978	0.000927417	0.108249	0.0763922	14 x 40		1 q32	cytochrome b5 reductase 1 [Source:HGNC Symbol;Acc:HGNC:13397]
279	ENSG00000136451	VEZF1	-0.857457	-0.35889	-3.84452	0.000935489	0.108249	0.0765867	1 x 13	I	17 q22	vascular endothelial zinc finger 1 [Source:HGNC Symbol;Acc:HGNC:12949]
280	ENSG00000197837	HIST4H4	-1.67529	-0.567849	-3.92306	0.000935603	0.108249	0.0765894	7 x 34		12 p12	histone cluster 4 H4 [Source:HGNC Symbol;Acc:HGNC:20510]
281	ENSG00000249825	CTD-2201I18.1	-1.06766	-0.425027	-3.83123	0.000978711	0.108249	0.0775889	1 x 25		5 q14	uncharacterized LOC101929215 [Source:NCBI gene;Acc:101929215]
282	ENSG00000167183	PRR15L	-1.80114	-0.588445	-3.74436	0.000987811	0.108249	0.0777919	10 x 40	K	17 q21	proline rich 15 like [Source:HGNC Symbol;Acc:HGNC:28149]
283	ENSG00000134627	PIWIL4	1.31902	0.831482	3.86261	0.000990446	0.108249	0.0778502	36 x 19		11 q21	piwi like RNA-mediated gene silencing 4 [Source:HGNC Symbol;Acc:HGNC:18444]
284	ENSG00000203668	CHML	1.72364	1.15442	3.72972	0.000993891	0.108249	0.077926	29 x 21		1 q43	CHM like, Rab escort protein 2 [Source:HGNC Symbol;Acc:HGNC:1941]
285	ENSG00000225177		0.854944	0.500323	3.73319	0.000994775	0.108249	0.0779454	37 x 21	C	6 q24
286	ENSG00000146233	CYP39A1	1.76637	1.19038	3.76916	0.000998931	0.108249	0.0780363	34 x 21	B	6 p12	cytochrome P450 family 39 subfamily A member 1 [Source:HGNC Symbol;Acc:HGNC:17449]
287	ENSG00000203985	LDLRAD1	-1.59098	-0.552325	-3.80529	0.00100294	0.108249	0.0781234	8 x 40	K	1 p32	low density lipoprotein receptor class A domain containing 1 [Source:HGNC Symbol;Acc:HGNC:32069]
288	ENSG00000117472	TSPAN1	-2.88432	-0.638259	-3.72621	0.00102626	0.108249	0.0786206	8 x 40	K	1 p34	tetraspanin 1 [Source:HGNC Symbol;Acc:HGNC:20657]
289	ENSG00000176155	CCDC57	-0.765566	-0.327276	-3.72492	0.00102686	0.108249	0.0786332	7 x 29		17 q25	coiled-coil domain containing 57 [Source:HGNC Symbol;Acc:HGNC:27564]
290	ENSG00000154734	ADAMTS1	1.03568	0.62431	3.75212	0.00103738	0.108249	0.078852	11 x 6		21 q21	ADAM metallopeptidase with thrombospondin type 1 motif 1 [Source:HGNC Symbol;Acc:HGNC:217]
291	ENSG00000251073		-0.483339	-0.219901	-3.72003	0.0010415	0.108249	0.0789368	8 x 16		4 q32	nudix hydrolase 19 pseudogene 5 [Source:HGNC Symbol;Acc:HGNC:43589]
292	ENSG00000176406	RIMS2	-2.2868	-0.639023	-3.7136	0.00104183	0.108249	0.0789436	40 x 22	C	8 q22	regulating synaptic membrane exocytosis 2 [Source:HGNC Symbol;Acc:HGNC:17283]
293	ENSG00000234869		-1.10451	-0.435737	-3.77297	0.00105749	0.108249	0.0792613	9 x 33		22 q13
294	ENSG00000145911	N4BP3	-1.67399	-0.56762	-3.72944	0.00106471	0.108249	0.0794056	22 x 15		5 q35	NEDD4 binding protein 3 [Source:HGNC Symbol;Acc:HGNC:29852]
295	ENSG00000152284	TCF7L1	1.41434	0.904693	3.71694	0.00106734	0.108249	0.0794577	32 x 24	B	2 p11	transcription factor 7 like 1 [Source:HGNC Symbol;Acc:HGNC:11640]
296	ENSG00000181191	PJA1	0.632611	0.356523	3.72295	0.00106905	0.108249	0.0794915	9 x 11		X q13	praja ring finger ubiquitin ligase 1 [Source:HGNC Symbol;Acc:HGNC:16648]
297	ENSG00000170035	UBE2E3	1.11152	0.678231	3.70653	0.0010849	0.108249	0.0798012	33 x 23	B	2 q31	ubiquitin conjugating enzyme E2 E3 [Source:HGNC Symbol;Acc:HGNC:12479]
298	ENSG00000054598	FOXC1	2.4445	1.80872	3.70752	0.00109272	0.108249	0.0799515	40 x 19	C	6 p25	forkhead box C1 [Source:HGNC Symbol;Acc:HGNC:3800]
299	ENSG00000108878	CACNG1	-2.94009	-0.634642	-3.70269	0.00110218	0.108249	0.0801314	14 x 40		17 q24	calcium voltage-gated channel auxiliary subunit gamma 1 [Source:HGNC Symbol;Acc:HGNC:1405]
300	ENSG00000184378	ACTRT3	0.788092	0.456073	3.72899	0.00111863	0.108249	0.0804387	33 x 20		3 q26	actin related protein T3 [Source:HGNC Symbol;Acc:HGNC:24022]
301	ENSG00000163872	YEATS2	0.791789	0.458497	3.68076	0.00112104	0.108249	0.0804832	27 x 21		3 q27	YEATS domain containing 2 [Source:HGNC Symbol;Acc:HGNC:25489]
302	ENSG00000163517	HDAC11	-1.32703	-0.494783	-3.8119	0.00112485	0.108249	0.0805531	15 x 40		3 p25	histone deacetylase 11 [Source:HGNC Symbol;Acc:HGNC:19086]
303	ENSG00000167861	HID1	-1.93614	-0.607111	-3.70806	0.00112784	0.108249	0.0806078	12 x 40	K	17 q25	HID1 domain containing [Source:HGNC Symbol;Acc:HGNC:15736]
304	ENSG00000162104	ADCY9	-1.12818	-0.442474	-3.68822	0.00112988	0.108249	0.080645	2 x 5	H	16 p13	adenylate cyclase 9 [Source:HGNC Symbol;Acc:HGNC:240]
305	ENSG00000271109	LOC102723540	-1.20565	-0.46377	-3.75654	0.00113559	0.108249	0.0807484	5 x 35		19 q13
306	ENSG00000122417	ODF2L	0.847686	0.495477	3.71157	0.00113886	0.108249	0.0808075	34 x 18		1 p22	outer dense fiber of sperm tails 2 like [Source:HGNC Symbol;Acc:HGNC:29225]
307	ENSG00000146776	ATXN7L1	0.609108	0.341884	3.68493	0.00114139	0.108249	0.0808529	8 x 10		7 q22	ataxin 7 like 1 [Source:HGNC Symbol;Acc:HGNC:22210]
308	ENSG00000136546	SCN7A	-1.6927	-0.570881	-3.76584	0.00114283	0.108249	0.0808787	14 x 1		2 q24	sodium voltage-gated channel alpha subunit 7 [Source:HGNC Symbol;Acc:HGNC:10594]
309	ENSG00000163376	KBTBD8	1.04604	0.631611	3.69876	0.00114415	0.108249	0.0809022	33 x 5		3 p14	kelch repeat and BTB domain containing 8 [Source:HGNC Symbol;Acc:HGNC:30691]
310	ENSG00000267009		-1.11377	-0.438387	-3.77634	0.00114981	0.108249	0.081003	8 x 35		17 q24
311	ENSG00000146648	EGFR	1.14826	0.704758	3.70424	0.00115146	0.108249	0.0810323	11 x 5		7 p11	epidermal growth factor receptor [Source:HGNC Symbol;Acc:HGNC:3236]
312	ENSG00000073849	ST6GAL1	1.46524	0.94451	3.66951	0.00115188	0.108249	0.0810396	36 x 11		3 q27	ST6 beta-galactoside alpha-2,6-sialyltransferase 1 [Source:HGNC Symbol;Acc:HGNC:10860]
313	ENSG00000177728	TMEM94	-0.714191	-0.308884	-3.67351	0.00115493	0.108249	0.0810935	23 x 16		17 q25	transmembrane protein 94 [Source:HGNC Symbol;Acc:HGNC:28983]
314	ENSG00000141232	TOB1	-1.28088	-0.48333	-3.66844	0.00115999	0.108249	0.0811824	1 x 14	I	17 q21	transducer of ERBB2, 1 [Source:HGNC Symbol;Acc:HGNC:11979]
315	ENSG00000076344	RGS11	-1.93622	-0.607122	-3.70115	0.00116047	0.108249	0.0811907	13 x 40		16 p13	regulator of G protein signaling 11 [Source:HGNC Symbol;Acc:HGNC:9993]
316	ENSG00000063854	HAGH	-0.931347	-0.383119	-3.68022	0.00116237	0.108249	0.0812238	17 x 40		16 p13	hydroxyacylglutathione hydrolase [Source:HGNC Symbol;Acc:HGNC:4805]
317	ENSG00000175895	PLEKHF2	-1.34187	-0.498377	-3.74649	0.00116387	0.108249	0.0812501	12 x 40	K	8 q22	pleckstrin homology and FYVE domain containing 2 [Source:HGNC Symbol;Acc:HGNC:20757]
318	ENSG00000260618		-0.764113	-0.326762	-3.69418	0.00116689	0.108249	0.0813024	3 x 23		15 q21
319	ENSG00000268100		-1.04461	-0.418197	-3.93173	0.00117081	0.108249	0.0813704	12 x 38		19 p12
320	ENSG00000258813		0.412458	0.223613	3.73402	0.00117642	0.108249	0.0814669	30 x 34		14 q24
321	ENSG00000165046	LETM2	-1.22391	-0.468617	-3.67915	0.00118435	0.108249	0.081602	5 x 35		8 p11	leucine zipper and EF-hand containing transmembrane protein 2 [Source:HGNC Symbol;Acc:HGNC:14648]
322	ENSG00000244332		0.448806	0.244906	3.71022	0.00118591	0.108249	0.0816284	15 x 28		10 q23
323	ENSG00000214102	WEE2	0.497832	0.274034	3.73253	0.00118665	0.108249	0.081641	8 x 20		7 q34	WEE1 homolog 2 [Source:HGNC Symbol;Acc:HGNC:19684]
324	ENSG00000073464	CLCN4	1.79968	1.21867	3.70345	0.00118758	0.108249	0.0816566	32 x 24	B	X p22	chloride voltage-gated channel 4 [Source:HGNC Symbol;Acc:HGNC:2022]
325	ENSG00000154760	SLFN13	2.05013	1.43824	3.66196	0.00118976	0.108249	0.0816934	36 x 21	C	17 q12	schlafen family member 13 [Source:HGNC Symbol;Acc:HGNC:26481]
326	ENSG00000132026	RTBDN	-1.77659	-0.584669	-3.80104	0.00119089	0.108249	0.0817124	29 x 31		19 p13	retbindin [Source:HGNC Symbol;Acc:HGNC:30310]
327	ENSG00000165030	NFIL3	1.29483	0.813186	3.65473	0.00119887	0.108249	0.0818461	37 x 20	C	9 q22	nuclear factor, interleukin 3 regulated [Source:HGNC Symbol;Acc:HGNC:7787]
328	ENSG00000167778	SPRYD3	-0.921714	-0.38002	-3.74925	0.001202	0.108249	0.081898	14 x 39		12 q13	SPRY domain containing 3 [Source:HGNC Symbol;Acc:HGNC:25920]
329	ENSG00000162735	PEX19	-0.637082	-0.280316	-3.65244	0.00120967	0.108249	0.0820247	1 x 17		1 q23	peroxisomal biogenesis factor 19 [Source:HGNC Symbol;Acc:HGNC:9713]
330	ENSG00000259091	LINC00517	-0.674503	-0.294324	-3.67398	0.00121366	0.108249	0.08209	17 x 9		14 q21	long intergenic non-protein coding RNA 517 [Source:HGNC Symbol;Acc:HGNC:19831]
331	ENSG00000155868	MED7	-0.451205	-0.206692	-3.65215	0.00121832	0.108249	0.0821659	20 x 40		5 q33	mediator complex subunit 7 [Source:HGNC Symbol;Acc:HGNC:2378]
332	ENSG00000272655		-1.0354	-0.415436	-3.64603	0.00122231	0.108249	0.0822306	28 x 34		7 p13	RNA polymerase II subunit J4, pseudogene [Source:HGNC Symbol;Acc:HGNC:28195]
333	ENSG00000137497	NUMA1	-0.662081	-0.289704	-3.64177	0.00123767	0.108249	0.0824766	1 x 23		11 q13	nuclear mitotic apparatus protein 1 [Source:HGNC Symbol;Acc:HGNC:8059]
334	ENSG00000254231	LOC105375624	-2.11888	-0.626728	-3.70411	0.00123957	0.108249	0.0825067	10 x 38	K	8 q21
335	ENSG00000144452	ABCA12	-2.47426	-0.646265	-3.69873	0.00124269	0.108249	0.082556	7 x 39	K	2 q35	ATP binding cassette subfamily A member 12 [Source:HGNC Symbol;Acc:HGNC:14637]
336	ENSG00000229664		0.486874	0.267484	3.77913	0.00124364	0.108249	0.0825711	33 x 11		10 p15
337	ENSG00000111716	LDHB	1.69641	1.13169	3.64654	0.00125582	0.108249	0.0827614	33 x 24	B	12 p12	lactate dehydrogenase B [Source:HGNC Symbol;Acc:HGNC:6541]
338	ENSG00000178187	ZNF454	1.04981	0.634274	3.71784	0.00125586	0.108249	0.082762	30 x 23	B	5 q35	zinc finger protein 454 [Source:HGNC Symbol;Acc:HGNC:21200]
339	ENSG00000272192		0.71597	0.40931	3.65069	0.00125673	0.108249	0.0827755	33 x 30		8 q13
340	ENSG00000259865		0.874751	0.513601	3.63483	0.0012583	0.108249	0.0827998	12 x 28		1 q44
341	ENSG00000183888	C1orf64	-3.3349	-0.591721	-3.64577	0.00126851	0.108249	0.0829569	8 x 39	K	1 p36	chromosome 1 open reading frame 64 [Source:HGNC Symbol;Acc:HGNC:28339]
342	ENSG00000280099		-1.8426	-0.594555	-3.6317	0.00126883	0.108249	0.0829617	10 x 33		1 p22
343	ENSG00000158516	CPA2	0.79367	0.459732	3.78625	0.00126942	0.108249	0.0829708	28 x 26		7 q32	carboxypeptidase A2 [Source:HGNC Symbol;Acc:HGNC:2297]
344	ENSG00000111058	ACSS3	-1.57002	-0.548252	-3.67788	0.00127736	0.108249	0.0830913	1 x 4	H	12 q21	acyl-CoA synthetase short chain family member 3 [Source:HGNC Symbol;Acc:HGNC:24723]
345	ENSG00000048991	R3HDM1	0.672022	0.381311	3.63468	0.00127839	0.108249	0.0831068	28 x 19		2 q21	R3H domain containing 1 [Source:HGNC Symbol;Acc:HGNC:9757]
346	ENSG00000198863	RUNDC1	-1.05684	-0.421835	-3.6465	0.00127905	0.108249	0.0831169	9 x 37		17 q21	RUN domain containing 1 [Source:HGNC Symbol;Acc:HGNC:25418]
347	ENSG00000170871	KIAA0232	-0.915778	-0.378102	-3.63326	0.00129156	0.108249	0.0833041	1 x 8	H	4 p16	KIAA0232 [Source:HGNC Symbol;Acc:HGNC:28992]
348	ENSG00000105855	ITGB8	2.09363	1.47762	3.62588	0.00129254	0.108249	0.0833187	40 x 12	D	7 p21	integrin subunit beta 8 [Source:HGNC Symbol;Acc:HGNC:6163]
349	ENSG00000134480	CCNH	-0.562961	-0.251764	-3.62232	0.00129761	0.108249	0.0833939	20 x 40		5 q14	cyclin H [Source:HGNC Symbol;Acc:HGNC:1594]
350	ENSG00000147852	VLDLR	1.59882	1.0514	3.6222	0.00129983	0.108249	0.0834266	38 x 19	C	9 p24	very low density lipoprotein receptor [Source:HGNC Symbol;Acc:HGNC:12698]
351	ENSG00000215515		0.554159	0.308078	3.98733	0.0013085	0.108249	0.0835534	14 x 16		13 q13	interferon induced protein with tetratricopeptide repeats 1 pseudogene 1 [Source:HGNC Symbol;Acc:HGNC:5408]
352	ENSG00000186951	PPARA	1.15305	0.708233	3.61921	0.00131072	0.108249	0.0835858	10 x 7		22 q13	peroxisome proliferator activated receptor alpha [Source:HGNC Symbol;Acc:HGNC:9232]
353	ENSG00000277363	SRCIN1	-1.51503	-0.537158	-3.65825	0.0013146	0.108249	0.083642	1 x 36		17 q12	SRC kinase signaling inhibitor 1 [Source:HGNC Symbol;Acc:HGNC:29506]
354	ENSG00000186665	C17orf58	-1.31768	-0.492495	-3.61799	0.0013147	0.108249	0.0836434	18 x 40		17 q24	chromosome 17 open reading frame 58 [Source:HGNC Symbol;Acc:HGNC:27568]
355	ENSG00000186073	C15orf41	0.821028	0.477765	3.67878	0.00131904	0.108249	0.083706	31 x 21		15 q14	chromosome 15 open reading frame 41 [Source:HGNC Symbol;Acc:HGNC:26929]
356	ENSG00000243797		0.77621	0.4483	3.66844	0.00132132	0.108249	0.0837388	35 x 17		7 q22
357	ENSG00000167703	SLC43A2	0.862252	0.505213	3.65555	0.00132477	0.108249	0.0837883	31 x 7		17 p13	solute carrier family 43 member 2 [Source:HGNC Symbol;Acc:HGNC:23087]
358	ENSG00000280916		2.05068	1.43873	3.68226	0.00132518	0.108249	0.0837941	40 x 20	C	6 p25	FOXC1 upstream transcript (non-protein coding) [Source:HGNC Symbol;Acc:HGNC:50650]
359	ENSG00000112242	E2F3	1.05956	0.64117	3.62154	0.00132652	0.108249	0.0838132	31 x 21		6 p22	E2F transcription factor 3 [Source:HGNC Symbol;Acc:HGNC:3115]
360	ENSG00000155629	PIK3AP1	1.41264	0.903368	3.64775	0.00133462	0.108249	0.0839282	34 x 1	F	10 q24	phosphoinositide-3-kinase adaptor protein 1 [Source:HGNC Symbol;Acc:HGNC:30034]
361	ENSG00000126562	WNK4	-2.86973	-0.639106	-3.61178	0.00133698	0.108249	0.0839614	3 x 1		17 q21	WNK lysine deficient protein kinase 4 [Source:HGNC Symbol;Acc:HGNC:14544]
362	ENSG00000270885	RASL10B	1.27556	0.798692	3.79369	0.00134404	0.108249	0.0840606	30 x 26		17 q12	RAS like family 10 member B [Source:HGNC Symbol;Acc:HGNC:30295]
363	ENSG00000196834	POTEI	-1.19314	-0.46041	-3.87682	0.00134429	0.108249	0.084064	14 x 36		2 q21	POTE ankyrin domain family member I [Source:HGNC Symbol;Acc:HGNC:37093]
364	ENSG00000145428	RNF175	1.15902	0.712573	3.63428	0.00136053	0.108249	0.0842889	14 x 6		4 q31	ring finger protein 175 [Source:HGNC Symbol;Acc:HGNC:27735]
365	ENSG00000178568	ERBB4	-2.95913	-0.633268	-3.60366	0.00136126	0.108249	0.0842988	1 x 23		2 q34	erb-b2 receptor tyrosine kinase 4 [Source:HGNC Symbol;Acc:HGNC:3432]
366	ENSG00000189362	NEMP2	0.822232	0.478562	3.66426	0.00136265	0.108249	0.0843179	33 x 19		2 q32	nuclear envelope integral membrane protein 2 [Source:HGNC Symbol;Acc:HGNC:33700]
367	ENSG00000023445	BIRC3	1.98496	1.37992	3.70499	0.00136697	0.108249	0.0843769	40 x 5	E	11 q22	baculoviral IAP repeat containing 3 [Source:HGNC Symbol;Acc:HGNC:591]
368	ENSG00000181610	MRPS23	-0.921988	-0.380109	-3.60564	0.00136839	0.108249	0.0843962	38 x 33		17 q22	mitochondrial ribosomal protein S23 [Source:HGNC Symbol;Acc:HGNC:14509]
369	ENSG00000168907	PLA2G4F	-2.03208	-0.618221	-3.60602	0.00137238	0.108249	0.0844503	2 x 35		15 q15	phospholipase A2 group IVF [Source:HGNC Symbol;Acc:HGNC:27396]
370	ENSG00000116191	RALGPS2	-1.78803	-0.586444	-3.62429	0.00137976	0.108249	0.0845497	1 x 5	H	1 q25	Ral GEF with PH domain and SH3 binding motif 2 [Source:HGNC Symbol;Acc:HGNC:30279]
371	ENSG00000236404	VLDLR-AS1	1.60069	1.05292	3.77097	0.00137983	0.108249	0.0845506	38 x 20	C	9 p24	VLDLR antisense RNA 1 [Source:HGNC Symbol;Acc:HGNC:49621]
372	ENSG00000072401	UBE2D1	0.506916	0.279483	3.59622	0.00138628	0.108249	0.0846369	32 x 16		10 q21	ubiquitin conjugating enzyme E2 D1 [Source:HGNC Symbol;Acc:HGNC:12474]
373	ENSG00000165568	AKR1E2	1.68218	1.11986	3.60377	0.00138809	0.108249	0.0846609	34 x 24	B	10 p15	aldo-keto reductase family 1 member E2 [Source:HGNC Symbol;Acc:HGNC:23437]
374	ENSG00000245750		-1.84778	-0.595295	-3.61094	0.00140013	0.108249	0.0848198	6 x 36		15 q23	downregulated RNA in cancer, inhibitor of cell invasion and migration [Source:HGNC Symbol;Acc:HGNC:27082]
375	ENSG00000145555		1.33446	0.84322	3.61489	0.00140259	0.108249	0.0848521	30 x 22		5 p15	myosin X [Source:HGNC Symbol;Acc:HGNC:7593]
376	ENSG00000263680		0.763173	0.439802	3.93653	0.00140437	0.108249	0.0848753	16 x 23		17 q24
377	ENSG00000145491	ROPN1L	-1.00931	-0.407531	-3.59427	0.00141135	0.108249	0.084966	1 x 40		5 p15	rhophilin associated tail protein 1 like [Source:HGNC Symbol;Acc:HGNC:24060]
378	ENSG00000148143	ZNF462	1.58205	1.03779	3.6439	0.00141889	0.108249	0.0850633	10 x 5		9 q31	zinc finger protein 462 [Source:HGNC Symbol;Acc:HGNC:21684]
379	ENSG00000158006	PAFAH2	-0.735361	-0.316525	-3.58683	0.00141963	0.108249	0.0850728	1 x 13	I	1 p36	platelet activating factor acetylhydrolase 2 [Source:HGNC Symbol;Acc:HGNC:8579]
380	ENSG00000273017		0.611339	0.343269	3.58592	0.0014228	0.108249	0.0851134	14 x 27		21 q21
381	ENSG00000170500	LONRF2	-1.82014	-0.591286	-3.60775	0.0014368	0.108249	0.085291	4 x 40	K	2 q11	LON peptidase N-terminal domain and ring finger 2 [Source:HGNC Symbol;Acc:HGNC:24788]
382	ENSG00000261857	MIA	2.6261	1.98951	3.59873	0.00143912	0.108249	0.0853201	39 x 19	C	19 q13	melanoma inhibitory activity [Source:HGNC Symbol;Acc:HGNC:7076]
383	ENSG00000029725	RABEP1	-0.80425	-0.340785	-3.58584	0.00144374	0.108249	0.085378	1 x 17		17 p13	rabaptin, RAB GTPase binding effector protein 1 [Source:HGNC Symbol;Acc:HGNC:17677]
384	ENSG00000197822	OCLN	-1.0816	-0.42911	-3.60141	0.00144627	0.108249	0.0854095	1 x 10	I	5 q13	occludin [Source:HGNC Symbol;Acc:HGNC:8104]
385	ENSG00000176887	SOX11	2.53968	1.90268	3.84271	0.00145521	0.108249	0.0855204	32 x 25	B	2 p25	SRY-box 11 [Source:HGNC Symbol;Acc:HGNC:11191]
386	ENSG00000182544	MFSD5	-0.718917	-0.310597	-3.59928	0.00145641	0.108249	0.0855352	16 x 40		12 q13	major facilitator superfamily domain containing 5 [Source:HGNC Symbol;Acc:HGNC:28156]
387	ENSG00000198062	POTEH	-0.482438	-0.219534	-3.81512	0.00145786	0.108249	0.0855531	7 x 35		22 q11	POTE ankyrin domain family member H [Source:HGNC Symbol;Acc:HGNC:133]
388	ENSG00000245857	GS1-24F4.2	0.535921	0.296987	3.57499	0.00147011	0.108249	0.0857028	20 x 25		8 p23	uncharacterized LOC100652791 [Source:NCBI gene;Acc:100652791]
389	ENSG00000162946	DISC1	0.831147	0.484472	3.66744	0.00148247	0.108249	0.0858519	11 x 6		1 q42	disrupted in schizophrenia 1 [Source:HGNC Symbol;Acc:HGNC:2888]
390	ENSG00000141977	CIB3	-1.52891	-0.540014	-3.62094	0.00148759	0.108249	0.0859131	9 x 37		19 p13	calcium and integrin binding family member 3 [Source:HGNC Symbol;Acc:HGNC:24580]
391	ENSG00000084628	NKAIN1	-3.11857	-0.618997	-3.56936	0.00149067	0.108249	0.0859497	1 x 35		1 p35	sodium/potassium transporting ATPase interacting 1 [Source:HGNC Symbol;Acc:HGNC:25743]
392	ENSG00000143674	MAP3K21	1.92935	1.33082	3.63432	0.00149486	0.108249	0.0859994	23 x 23		1 q42	mitogen-activated protein kinase kinase kinase 21 [Source:HGNC Symbol;Acc:HGNC:29798]
393	ENSG00000170485	NPAS2	1.49397	0.967205	3.70389	0.00149564	0.108249	0.0860086	40 x 15	C	2 q11	neuronal PAS domain protein 2 [Source:HGNC Symbol;Acc:HGNC:7895]
394	ENSG00000136436	CALCOCO2	-0.808105	-0.342115	-3.60787	0.00149597	0.108249	0.0860125	27 x 12		17 q21	calcium binding and coiled-coil domain 2 [Source:HGNC Symbol;Acc:HGNC:29912]
395	ENSG00000160460	SPTBN4	-1.69211	-0.570781	-3.62528	0.00149804	0.108249	0.0860369	1 x 35		19 q13	spectrin beta, non-erythrocytic 4 [Source:HGNC Symbol;Acc:HGNC:14896]
396	ENSG00000091490	SEL1L3	1.41173	0.902664	3.59993	0.00150057	0.108249	0.0860667	32 x 8		4 p15	SEL1L family member 3 [Source:HGNC Symbol;Acc:HGNC:29108]
397	ENSG00000158545	ZC3H18	0.656164	0.371301	3.61326	0.00150405	0.108249	0.0861075	22 x 20		16 q24	zinc finger CCCH-type containing 18 [Source:HGNC Symbol;Acc:HGNC:25091]
398	ENSG00000187534		-0.714481	-0.308989	-3.57876	0.00150694	0.108249	0.0861413	15 x 38		19 q13	proline rich 13 pseudogene 5 [Source:HGNC Symbol;Acc:HGNC:50618]
399	ENSG00000141642	ELAC1	0.926674	0.54877	3.56366	0.0015071	0.108249	0.0861432	35 x 17		18 q21	elaC ribonuclease Z 1 [Source:HGNC Symbol;Acc:HGNC:14197]
400	ENSG00000114796	KLHL24	0.778115	0.449544	3.5659	0.00151292	0.108249	0.0862109	31 x 20		3 q27	kelch like family member 24 [Source:HGNC Symbol;Acc:HGNC:25947]
401	ENSG00000184160	ADRA2C	-1.94567	-0.608296	-3.58954	0.00151308	0.108249	0.0862128	15 x 40		4 p16	adrenoceptor alpha 2C [Source:HGNC Symbol;Acc:HGNC:283]
402	ENSG00000081181	ARG2	1.16215	0.71485	3.63892	0.00151384	0.108249	0.0862215	31 x 22	B	14 q24	arginase 2 [Source:HGNC Symbol;Acc:HGNC:664]
403	ENSG00000131148	EMC8	0.612482	0.343978	3.58325	0.00151485	0.108249	0.0862333	35 x 30		16 q24	ER membrane protein complex subunit 8 [Source:HGNC Symbol;Acc:HGNC:7864]
404	ENSG00000089177	KIF16B	-0.837319	-0.352102	-3.55988	0.00152108	0.108249	0.0863051	1 x 19		20 p12	kinesin family member 16B [Source:HGNC Symbol;Acc:HGNC:15869]
405	ENSG00000148468	FAM171A1	1.4624	0.942272	3.56109	0.00153498	0.108249	0.0864639	23 x 24		10 p13	family with sequence similarity 171 member A1 [Source:HGNC Symbol;Acc:HGNC:23522]
406	ENSG00000181773	GPR3	1.22826	0.763416	3.6359	0.00155154	0.108249	0.0866501	35 x 23	B	1 p36	G protein-coupled receptor 3 [Source:HGNC Symbol;Acc:HGNC:4484]
407	ENSG00000148795	CYP17A1	-0.879288	-0.366159	-3.57141	0.00155257	0.108249	0.0866615	3 x 32		10 q24	cytochrome P450 family 17 subfamily A member 1 [Source:HGNC Symbol;Acc:HGNC:2593]
408	ENSG00000273472		-1.79433	-0.587409	-3.71729	0.00155529	0.108249	0.0866917	8 x 35		4 q31
409	ENSG00000273489		0.423545	0.230081	3.55256	0.0015556	0.108249	0.0866951	13 x 21		7 q32
410	ENSG00000254851		1.96064	1.35838	3.59427	0.00155728	0.108249	0.0867138	20 x 9		11 q23
411	ENSG00000262151		0.383635	0.20691	3.65125	0.00157096	0.108249	0.0868642	15 x 19		16 p13
412	ENSG00000218416	PP14571	-2.88514	-0.63821	-3.62724	0.00158395	0.108249	0.0870053	1 x 2	H	2 q37	uncharacterized LOC100130449 [Source:NCBI gene;Acc:100130449]
413	ENSG00000225362	CT62	-2.20422	-0.633662	-3.55294	0.00158821	0.108249	0.087051	9 x 36		15 q23	cancer/testis antigen 62 [Source:HGNC Symbol;Acc:HGNC:27286]
414	ENSG00000075461	CACNG4	-3.41722	-0.578949	-3.54353	0.0015925	0.108249	0.087097	2 x 1		17 q24	calcium voltage-gated channel auxiliary subunit gamma 4 [Source:HGNC Symbol;Acc:HGNC:1408]
415	ENSG00000167987	VPS37C	-0.841265	-0.353438	-3.5522	0.00159311	0.108249	0.0871035	23 x 13		11 q12	VPS37C, ESCRT-I subunit [Source:HGNC Symbol;Acc:HGNC:26097]
416	ENSG00000108244	KRT23	2.77279	2.14023	3.54698	0.00159473	0.108249	0.0871208	40 x 12	D	17 q21	keratin 23 [Source:HGNC Symbol;Acc:HGNC:6438]
417	ENSG00000214530	STARD10	-1.92292	-0.60544	-3.5857	0.00159941	0.108249	0.0871706	40 x 39		11 q13	StAR related lipid transfer domain containing 10 [Source:HGNC Symbol;Acc:HGNC:10666]
418	ENSG00000109472	CPE	-1.47796	-0.529348	-3.54443	0.00160094	0.108249	0.0871868	18 x 5		4 q32	carboxypeptidase E [Source:HGNC Symbol;Acc:HGNC:2303]
419	ENSG00000133328	HRASLS2	-1.98992	-0.61356	-3.53907	0.00160106	0.108249	0.087188	11 x 40	K	11 q12	HRAS like suppressor 2 [Source:HGNC Symbol;Acc:HGNC:17824]
420	ENSG00000105854	PON2	0.727311	0.416597	3.58798	0.00160178	0.108249	0.0871958	16 x 36		7 q21	paraoxonase 2 [Source:HGNC Symbol;Acc:HGNC:9205]
421	ENSG00000228701	TNKS2-AS1	0.69837	0.398052	3.53875	0.00160283	0.108249	0.0872068	32 x 28		10 q23	TNKS2 antisense RNA 1 (head to head) [Source:HGNC Symbol;Acc:HGNC:45173]
422	ENSG00000013619	MAMLD1	1.56073	1.02057	3.69902	0.00161564	0.108249	0.0873414	22 x 24		X q28	mastermind like domain containing 1 [Source:HGNC Symbol;Acc:HGNC:2568]
423	ENSG00000062194	GPBP1	-0.50011	-0.226715	-3.59331	0.00163439	0.108249	0.0875354	1 x 16	I	5 q11	GC-rich promoter binding protein 1 [Source:HGNC Symbol;Acc:HGNC:29520]
424	ENSG00000132823	OSER1	-0.660361	-0.289062	-3.53542	0.00165239	0.108249	0.0877182	22 x 39		20 q13	oxidative stress responsive serine rich 1 [Source:HGNC Symbol;Acc:HGNC:16105]
425	ENSG00000114473	IQCG	1.1917	0.736454	3.52995	0.00165549	0.108249	0.0877494	20 x 24		3 q29	IQ motif containing G [Source:HGNC Symbol;Acc:HGNC:25251]
426	ENSG00000260468		-0.667303	-0.29165	-3.52598	0.00165563	0.108249	0.0877508	12 x 35		16 p13	long intergenic non-protein coding RNA 1290 [Source:HGNC Symbol;Acc:HGNC:50356]
427	ENSG00000271848		-0.429055	-0.197471	-3.54786	0.00166004	0.108249	0.087795	11 x 19		10 q22
428	ENSG00000003989	SLC7A2	-3.20961	-0.608628	-3.56441	0.00166079	0.108249	0.0878024	5 x 40	K	8 p22	solute carrier family 7 member 2 [Source:HGNC Symbol;Acc:HGNC:11060]
429	ENSG00000163918	RFC4	1.07972	0.655486	3.52619	0.00166291	0.108249	0.0878236	38 x 27	A	3 q27	replication factor C subunit 4 [Source:HGNC Symbol;Acc:HGNC:9972]
430	ENSG00000140443	IGF1R	-1.72147	-0.575764	-3.53876	0.00167742	0.108249	0.0879672	1 x 4	H	15 q26	insulin like growth factor 1 receptor [Source:HGNC Symbol;Acc:HGNC:5465]
431	ENSG00000058729	RIOK2	-0.420352	-0.193821	-3.53278	0.00167906	0.108249	0.0879833	21 x 39		5 q15	RIO kinase 2 [Source:HGNC Symbol;Acc:HGNC:18999]
432	ENSG00000213246	SUPT4H1	-0.817365	-0.345299	-3.53002	0.00169109	0.108249	0.0881007	38 x 34		17 q22	SPT4 homolog, DSIF elongation factor subunit [Source:HGNC Symbol;Acc:HGNC:11467]
433	ENSG00000007952	NOX1	-0.703279	-0.304912	-3.52491	0.00169131	0.108249	0.0881028	20 x 40		X q22	NADPH oxidase 1 [Source:HGNC Symbol;Acc:HGNC:7889]
434	ENSG00000235584		-2.75511	-0.644313	-3.58191	0.00169559	0.108249	0.0881441	7 x 36		2 q11
435	ENSG00000149970	CNKSR2	1.66715	1.10742	3.656	0.0016961	0.108249	0.0881491	33 x 23	B	X p22	connector enhancer of kinase suppressor of Ras 2 [Source:HGNC Symbol;Acc:HGNC:19701]
436	ENSG00000137673	MMP7	2.83148	2.2017	3.75847	0.00169636	0.108249	0.0881516	40 x 11	D	11 q22	matrix metallopeptidase 7 [Source:HGNC Symbol;Acc:HGNC:7174]
437	ENSG00000099256	PRTFDC1	1.58673	1.04158	3.57292	0.00169874	0.108249	0.0881746	33 x 24	B	10 p12	phosphoribosyl transferase domain containing 1 [Source:HGNC Symbol;Acc:HGNC:23333]
438	ENSG00000146278	PNRC1	0.898959	0.529932	3.5209	0.00169964	0.108249	0.0881832	36 x 18		6 q15	proline rich nuclear receptor coactivator 1 [Source:HGNC Symbol;Acc:HGNC:17278]
439	ENSG00000277462	ZNF670	0.936803	0.555691	3.51721	0.00170406	0.108249	0.0882257	29 x 21		1 q44	zinc finger protein 670 [Source:HGNC Symbol;Acc:HGNC:28167]
440	ENSG00000213866		0.917102	0.542247	3.51705	0.00171206	0.108249	0.0883019	35 x 18		9 p13	Y-box binding protein 1 pseudogene 10 [Source:HGNC Symbol;Acc:HGNC:42432]
441	ENSG00000159110	IFNAR2	0.721837	0.413076	3.51261	0.00171537	0.108249	0.0883333	36 x 11		21 q22	interferon alpha and beta receptor subunit 2 [Source:HGNC Symbol;Acc:HGNC:5433]
442	ENSG00000132793	LPIN3	-0.844793	-0.354631	-3.51114	0.00174448	0.108249	0.0886054	6 x 25		20 q12	lipin 3 [Source:HGNC Symbol;Acc:HGNC:14451]
443	ENSG00000275223		-1.0365	-0.415766	-3.62235	0.00174653	0.108249	0.0886242	17 x 17		20 q11
444	ENSG00000092200	RPGRIP1	-0.716581	-0.309751	-3.50532	0.00175319	0.108249	0.0886853	14 x 34		14 q11	retinitis pigmentosa GTPase regulator interacting protein 1 [Source:HGNC Symbol;Acc:HGNC:13436]
445	ENSG00000182580	EPHB3	1.54272	1.00608	3.52558	0.00176141	0.108249	0.0887602	40 x 17	C	3 q27	EPH receptor B3 [Source:HGNC Symbol;Acc:HGNC:3394]
446	ENSG00000112996	MRPS30	-1.41498	-0.515462	-3.67868	0.00176405	0.108249	0.0887841	19 x 40		5 p12	mitochondrial ribosomal protein S30 [Source:HGNC Symbol;Acc:HGNC:8769]
447	ENSG00000112699	GMDS	1.03406	0.62317	3.59614	0.00176536	0.108249	0.0887959	35 x 16		6 p25	GDP-mannose 4,6-dehydratase [Source:HGNC Symbol;Acc:HGNC:4369]
448	ENSG00000111052	LIN7A	-2.63106	-0.647068	-3.58448	0.00176846	0.108249	0.0888239	2 x 1		12 q21	lin-7 homolog A, crumbs cell polarity complex component [Source:HGNC Symbol;Acc:HGNC:17787]
449	ENSG00000135083	CCNJL	1.39932	0.893039	3.63023	0.00177203	0.108249	0.0888561	31 x 23	B	5 q33	cyclin J like [Source:HGNC Symbol;Acc:HGNC:25876]
450	ENSG00000172818	OVOL1	-1.70988	-0.573817	-3.57499	0.0017741	0.108249	0.0888746	23 x 14		11 q13	ovo like transcriptional repressor 1 [Source:HGNC Symbol;Acc:HGNC:8525]
451	ENSG00000107159	CA9	3.0923	2.483	3.50456	0.0017757	0.108249	0.088889	36 x 23	B	9 p13	carbonic anhydrase 9 [Source:HGNC Symbol;Acc:HGNC:1383]
452	ENSG00000123415	SMUG1	-0.752683	-0.322712	-3.60693	0.00177681	0.108249	0.0888989	28 x 33		12 q13	single-strand-selective monofunctional uracil-DNA glycosylase 1 [Source:HGNC Symbol;Acc:HGNC:17148]
453	ENSG00000237461	LOC101928438	0.525523	0.290693	3.51611	0.0017791	0.108249	0.0889194	20 x 27		9 q31
454	ENSG00000213695		0.412176	0.223448	3.49613	0.00178513	0.108249	0.0889731	29 x 38		X q13	ribosomal protein S7 pseudogene 14 [Source:HGNC Symbol;Acc:HGNC:36602]
455	ENSG00000151148	UBE3B	-0.625188	-0.275806	-3.55709	0.00178739	0.108249	0.088993	1 x 7	H	12 q24	ubiquitin protein ligase E3B [Source:HGNC Symbol;Acc:HGNC:13478]
456	ENSG00000141293	SKAP1	-1.67188	-0.567247	-3.53814	0.00179438	0.108249	0.0890548	6 x 40	K	17 q21	src kinase associated phosphoprotein 1 [Source:HGNC Symbol;Acc:HGNC:15605]
457	ENSG00000235374	SSR4P1	0.813901	0.473053	3.50274	0.00179441	0.108249	0.089055	21 x 22		21 q22	signal sequence receptor subunit 4 pseudogene 1 [Source:HGNC Symbol;Acc:HGNC:23131]
458	ENSG00000128283	CDC42EP1	1.11939	0.683888	3.49992	0.00179616	0.108249	0.0890705	40 x 14	D	22 q13	CDC42 effector protein 1 [Source:HGNC Symbol;Acc:HGNC:17014]
459	ENSG00000197506	SLC28A3	1.79903	1.21812	3.49093	0.00181041	0.108249	0.0891948	40 x 10	D	9 q21	solute carrier family 28 member 3 [Source:HGNC Symbol;Acc:HGNC:16484]
460	ENSG00000228613		-1.64343	-0.562146	-3.49239	0.0018137	0.108249	0.0892233	1 x 6	H	2 p25
461	ENSG00000104783	KCNN4	1.93698	1.33753	3.57414	0.00181948	0.108249	0.0892732	40 x 12	D	19 q13	potassium calcium-activated channel subfamily N member 4 [Source:HGNC Symbol;Acc:HGNC:6293]
462	ENSG00000166002	SMCO4	1.16219	0.714878	3.53152	0.00182102	0.108249	0.0892864	37 x 11		11 q21	single-pass membrane protein with coiled-coil domains 4 [Source:HGNC Symbol;Acc:HGNC:24810]
463	ENSG00000085831	TTC39A	-1.75451	-0.581173	-3.63233	0.00182237	0.108249	0.089298	8 x 40	K	1 p32	tetratricopeptide repeat domain 39A [Source:HGNC Symbol;Acc:HGNC:18657]
464	ENSG00000254290		-2.09297	-0.624343	-3.66289	0.00182237	0.108249	0.089298	3 x 37		8 p11
465	ENSG00000237330	RNF223	-1.72219	-0.575885	-3.60233	0.00182412	0.108249	0.089313	22 x 13		1 p36	ring finger protein 223 [Source:HGNC Symbol;Acc:HGNC:40020]
466	ENSG00000108469	RECQL5	-0.718013	-0.31027	-3.48567	0.0018315	0.108249	0.089376	22 x 17		17 q25	RecQ like helicase 5 [Source:HGNC Symbol;Acc:HGNC:9950]
467	ENSG00000104856	RELB	1.276	0.799022	3.61513	0.00183706	0.108249	0.0894231	37 x 10		19 q13	RELB proto-oncogene, NF-kB subunit [Source:HGNC Symbol;Acc:HGNC:9956]
468	ENSG00000188818	ZDHHC11	-1.21948	-0.467447	-3.48595	0.00183799	0.108249	0.089431	5 x 28		5 p15	zinc finger DHHC-type containing 11 [Source:HGNC Symbol;Acc:HGNC:19158]
469	ENSG00000167491	GATAD2A	0.534262	0.295982	3.49945	0.00184019	0.108249	0.0894496	22 x 20		19 p13	GATA zinc finger domain containing 2A [Source:HGNC Symbol;Acc:HGNC:29989]
470	ENSG00000148356	LRSAM1	-0.75397	-0.323169	-3.48335	0.00184148	0.108249	0.0894605	21 x 15		9 q33	leucine rich repeat and sterile alpha motif containing 1 [Source:HGNC Symbol;Acc:HGNC:25135]
471	ENSG00000168675	LDLRAD4	-1.15729	-0.450614	-3.59258	0.00184897	0.108249	0.0895235	3 x 5	H	18 p11	low density lipoprotein receptor class A domain containing 4 [Source:HGNC Symbol;Acc:HGNC:1224]
472	ENSG00000082482	KCNK2	2.09034	1.47463	3.48715	0.00185261	0.108249	0.0895539	19 x 5		1 q41	potassium two pore domain channel subfamily K member 2 [Source:HGNC Symbol;Acc:HGNC:6277]
473	ENSG00000158186	MRAS	1.35592	0.859613	3.48426	0.00186257	0.108249	0.0896367	28 x 1		3 q22	muscle RAS oncogene homolog [Source:HGNC Symbol;Acc:HGNC:7227]
474	ENSG00000186564	FOXD2	-1.42739	-0.518261	-3.48262	0.00186326	0.108249	0.0896424	11 x 38		1 p33	forkhead box D2 [Source:HGNC Symbol;Acc:HGNC:3803]
475	ENSG00000111860	CEP85L	0.833078	0.485754	3.48076	0.0018651	0.108249	0.0896576	12 x 8		6 q22	centrosomal protein 85 like [Source:HGNC Symbol;Acc:HGNC:21638]
476	ENSG00000186481		-1.17104	-0.4544	-3.47798	0.00187068	0.108249	0.0897036	1 x 22		18 p11	ankyrin repeat domain 20 family member A5, pseudogene [Source:HGNC Symbol;Acc:HGNC:33833]
477	ENSG00000000457	SCYL3	-0.607854	-0.269185	-3.47658	0.00187225	0.108249	0.0897164	1 x 17		1 q24	SCY1 like pseudokinase 3 [Source:HGNC Symbol;Acc:HGNC:19285]
478	ENSG00000187838	PLSCR3	0.588683	0.329249	3.48061	0.00187336	0.108249	0.0897255	21 x 22		17 p13	phospholipid scramblase 3 [Source:HGNC Symbol;Acc:HGNC:16495]
479	ENSG00000116014	KISS1R	-1.72896	-0.57701	-3.56119	0.0018748	0.108249	0.0897373	14 x 40		19 p13	KISS1 receptor [Source:HGNC Symbol;Acc:HGNC:4510]
480	ENSG00000260388	LINC00562	-0.390922	-0.181371	-3.53289	0.00187721	0.108249	0.089757	14 x 31		13 q14	long intergenic non-protein coding RNA 562 [Source:HGNC Symbol;Acc:HGNC:43706]
481	ENSG00000276649		1.2855	0.806154	3.49121	0.00188189	0.108249	0.0897952	12 x 6		20 p13
482	ENSG00000102287	GABRE	2.14397	1.52365	3.52372	0.00189294	0.108249	0.0898846	40 x 10	D	X q28	gamma-aminobutyric acid type A receptor epsilon subunit [Source:HGNC Symbol;Acc:HGNC:4085]
483	ENSG00000171604	CXXC5	-1.646	-0.562613	-3.47232	0.00189855	0.108249	0.0899297	14 x 40		5 q31	CXXC finger protein 5 [Source:HGNC Symbol;Acc:HGNC:26943]
484	ENSG00000074410	CA12	-3.00192	-0.629924	-3.48706	0.00190183	0.108249	0.089956	10 x 40	K	15 q22	carbonic anhydrase 12 [Source:HGNC Symbol;Acc:HGNC:1371]
485	ENSG00000234215		0.613547	0.34464	3.48025	0.00190413	0.108249	0.0899743	19 x 26		7 q11
486	ENSG00000141570	CBX8	-0.866525	-0.361921	-3.48068	0.00190637	0.108249	0.0899921	30 x 31		17 q25	chromobox 8 [Source:HGNC Symbol;Acc:HGNC:15962]
487	ENSG00000215089		-0.884107	-0.367751	-3.4943	0.00190947	0.108249	0.0900168	15 x 40		X q21	keratin 18 pseudogene 11 [Source:HGNC Symbol;Acc:HGNC:6431]
488	ENSG00000251136	LOC101929709	0.8698	0.510275	3.48272	0.00191076	0.118287	0.0900271	16 x 24		8 q21
489	ENSG00000153006	SREK1IP1	-0.492305	-0.223551	-3.48704	0.00191773	0.118287	0.0901053	21 x 40		5 q12	SREK1 interacting protein 1 [Source:HGNC Symbol;Acc:HGNC:26716]
490	ENSG00000205133	TRIQK	-0.98408	-0.399761	-3.55526	0.00192195	0.118287	0.0901524	1 x 15	I	8 q22	triple QxxK/R motif containing [Source:HGNC Symbol;Acc:HGNC:27828]
491	ENSG00000054219	LY75	1.32356	0.834929	3.46654	0.00193188	0.118287	0.0902628	39 x 9	D	2 q24	lymphocyte antigen 75 [Source:HGNC Symbol;Acc:HGNC:6729]
492	ENSG00000105695	MAG	-1.83613	-0.593624	-3.52886	0.00194672	0.118287	0.0904261	1 x 35		19 q13	myelin associated glycoprotein [Source:HGNC Symbol;Acc:HGNC:6783]
493	ENSG00000141527	CARD14	-0.945668	-0.387692	-3.4607	0.00194841	0.118287	0.0904446	18 x 19		17 q25	caspase recruitment domain family member 14 [Source:HGNC Symbol;Acc:HGNC:16446]
494	ENSG00000273824		0.431643	0.23482	3.46685	0.00195381	0.118287	0.0905035	33 x 8		12 q15
495	ENSG00000258404		0.377133	0.203165	3.71462	0.00195992	0.118287	0.0905697	35 x 13		14 q32	long intergenic non-protein coding RNA 2320 [Source:HGNC Symbol;Acc:HGNC:53239]
496	ENSG00000123124	WWP1	-1.66244	-0.565572	-3.51063	0.00197076	0.118287	0.0906867	12 x 39		8 q21	WW domain containing E3 ubiquitin protein ligase 1 [Source:HGNC Symbol;Acc:HGNC:17004]
497	ENSG00000153933	DGKE	-1.09773	-0.433788	-3.49059	0.00197326	0.118287	0.0907135	1 x 16	I	17 q22	diacylglycerol kinase epsilon [Source:HGNC Symbol;Acc:HGNC:2852]
498	ENSG00000198569	SLC34A3	-0.805669	-0.341275	-3.47521	0.00197369	0.118287	0.0907181	5 x 27		9 q34	solute carrier family 34 member 3 [Source:HGNC Symbol;Acc:HGNC:20305]
499	ENSG00000007314	SCN4A	-1.12404	-0.441304	-3.45429	0.00198022	0.118287	0.0907878	13 x 1		17 q23	sodium voltage-gated channel alpha subunit 4 [Source:HGNC Symbol;Acc:HGNC:10591]
500	ENSG00000179222	MAGED1	0.795777	0.461116	3.55529	0.00198047	0.118287	0.0907906	23 x 10		X p11	MAGE family member D1 [Source:HGNC Symbol;Acc:HGNC:6813]
501	ENSG00000119866	BCL11A	2.23126	1.60464	3.49033	0.00198112	0.118287	0.0907974	38 x 21	C	2 p16	B-cell CLL/lymphoma 11A [Source:HGNC Symbol;Acc:HGNC:13221]
502	ENSG00000206712		0.433749	0.236055	3.46834	0.00199953	0.118287	0.0909922	9 x 18		3 q12	RNA, U6 small nuclear 26, pseudogene [Source:HGNC Symbol;Acc:HGNC:34252]
503	ENSG00000266145		-0.617653	-0.272935	-3.4688	0.00200005	0.118287	0.0909976	4 x 20		18 p11
504	ENSG00000162482	AKR7A3	-2.61748	-0.647188	-3.45805	0.0020088	0.118287	0.0910892	5 x 30		1 p36	aldo-keto reductase family 7 member A3 [Source:HGNC Symbol;Acc:HGNC:390]
505	ENSG00000139644	TMBIM6	-0.909804	-0.376165	-3.48169	0.00201561	0.118287	0.0911599	16 x 39		12 q13	transmembrane BAX inhibitor motif containing 6 [Source:HGNC Symbol;Acc:HGNC:11723]
506	ENSG00000251259		0.803548	0.466226	3.44907	0.0020184	0.118287	0.0911889	18 x 26		4 q24
507	ENSG00000105419	MEIS3	-1.47228	-0.528125	-3.44859	0.0020202	0.118287	0.0912075	3 x 1		19 q13	Meis homeobox 3 [Source:HGNC Symbol;Acc:HGNC:29537]
508	ENSG00000102854	MSLN	3.72745	3.22342	3.79146	0.00202461	0.118287	0.091253	40 x 13	D	16 p13	mesothelin [Source:HGNC Symbol;Acc:HGNC:7371]
509	ENSG00000253986		0.44877	0.244885	3.47713	0.00203512	0.118287	0.0913608	20 x 31		8 p21
510	ENSG00000183273	CCDC60	-0.760392	-0.325447	-3.57635	0.00203795	0.118287	0.0913897	11 x 36		12 q24	coiled-coil domain containing 60 [Source:HGNC Symbol;Acc:HGNC:28610]
511	ENSG00000213397	HAUS7	0.66413	0.376323	3.51581	0.00204614	0.118287	0.0914729	15 x 26		X q28	HAUS augmin like complex subunit 7 [Source:HGNC Symbol;Acc:HGNC:32979]
512	ENSG00000076108	BAZ2A	-0.642293	-0.282283	-3.5192	0.00205065	0.118287	0.0915186	2 x 8	H	12 q13	bromodomain adjacent to zinc finger domain 2A [Source:HGNC Symbol;Acc:HGNC:962]
513	ENSG00000159200	RCAN1	1.1075	0.675342	3.43978	0.00205406	0.118287	0.091553	29 x 1		21 q22	regulator of calcineurin 1 [Source:HGNC Symbol;Acc:HGNC:3040]
514	ENSG00000272620	AFAP1-AS1	3.49384	2.94196	3.93786	0.00205823	0.118287	0.0915949	21 x 22		4 p16	AFAP1 antisense RNA 1 [Source:HGNC Symbol;Acc:HGNC:28141]
515	ENSG00000081985	IL12RB2	2.44168	1.80597	3.5342	0.00206092	0.118287	0.0916219	37 x 22	C	1 p31	interleukin 12 receptor subunit beta 2 [Source:HGNC Symbol;Acc:HGNC:5972]
516	ENSG00000134352	IL6ST	-1.11701	-0.439309	-3.43806	0.00206522	0.118287	0.0916649	2 x 4	H	5 q11	interleukin 6 signal transducer [Source:HGNC Symbol;Acc:HGNC:6021]
517	ENSG00000139531	SUOX	-0.908255	-0.375661	-3.4624	0.00207273	0.118287	0.0917397	8 x 36		12 q13	sulfite oxidase [Source:HGNC Symbol;Acc:HGNC:11460]
518	ENSG00000141376	BCAS3	-0.907071	-0.375276	-3.43489	0.00208335	0.118287	0.0918448	24 x 15		17 q23	BCAS3, microtubule associated cell migration factor [Source:HGNC Symbol;Acc:HGNC:14347]
519	ENSG00000197757	HOXC6	-0.920061	-0.379487	-3.58979	0.00209045	0.118287	0.0919146	20 x 8		12 q13	homeobox C6 [Source:HGNC Symbol;Acc:HGNC:5128]
520	ENSG00000115109	EPB41L5	-1.10998	-0.437302	-3.44861	0.0021021	0.118287	0.0920283	1 x 17		2 q14	erythrocyte membrane protein band 4.1 like 5 [Source:HGNC Symbol;Acc:HGNC:19819]
521	ENSG00000185650	ZFP36L1	0.753917	0.433788	3.48734	0.00210515	0.118287	0.0920579	9 x 7		14 q24	ZFP36 ring finger protein like 1 [Source:HGNC Symbol;Acc:HGNC:1107]
522	ENSG00000165140	FBP1	-2.31221	-0.640405	-3.42775	0.00211781	0.118287	0.0921801	12 x 40	K	9 q22	fructose-bisphosphatase 1 [Source:HGNC Symbol;Acc:HGNC:3606]
523	ENSG00000108176	DNAJC12	-2.6396	-0.646975	-3.55464	0.00211797	0.118287	0.0921817	6 x 37		10 q21	DnaJ heat shock protein family (Hsp40) member C12 [Source:HGNC Symbol;Acc:HGNC:28908]
524	ENSG00000204446		0.896364	0.528176	3.51753	0.00212548	0.118287	0.0922536	37 x 20	C	9 q21	chromosome 9 open reading frame 170 [Source:HGNC Symbol;Acc:HGNC:33817]
525	ENSG00000148341	SH3GLB2	-0.923548	-0.380612	-3.4268	0.00213295	0.118287	0.0923248	15 x 40		9 q34	SH3 domain containing GRB2 like, endophilin B2 [Source:HGNC Symbol;Acc:HGNC:10834]
526	ENSG00000107816	LZTS2	0.44383	0.241976	3.42608	0.00213502	0.118287	0.0923444	20 x 18		10 q24	leucine zipper tumor suppressor 2 [Source:HGNC Symbol;Acc:HGNC:29381]
527	ENSG00000177839	PCDHB9	1.36863	0.869366	3.45887	0.00214879	0.118287	0.0924744	32 x 23	B	5 q31	protocadherin beta 9 [Source:HGNC Symbol;Acc:HGNC:8694]
528	ENSG00000264513		-0.583	-0.259588	-3.59078	0.00215817	0.118287	0.0925621	14 x 29		17 q23
529	ENSG00000218358	RAET1K	0.974301	0.581491	3.47015	0.00216798	0.118287	0.0926534	36 x 26	B	6 q25	retinoic acid early transcript 1K pseudogene [Source:HGNC Symbol;Acc:HGNC:16797]
530	ENSG00000141367	CLTC	-0.992585	-0.402394	-3.42657	0.00217956	0.118287	0.0927601	1 x 12	I	17 q23	clathrin heavy chain [Source:HGNC Symbol;Acc:HGNC:2092]
531	ENSG00000158258	CLSTN2	-2.65656	-0.646747	-3.41664	0.00217996	0.118287	0.0927638	2 x 2	H	3 q23	calsyntenin 2 [Source:HGNC Symbol;Acc:HGNC:17448]
532	ENSG00000078687	TNRC6C	-0.909347	-0.376016	-3.4187	0.00218445	0.118287	0.092805	5 x 20		17 q25	trinucleotide repeat containing 6C [Source:HGNC Symbol;Acc:HGNC:29318]
533	ENSG00000145604	SKP2	1.19591	0.739545	3.47946	0.00218543	0.118287	0.0928139	37 x 25	C	5 p13	S-phase kinase associated protein 2 [Source:HGNC Symbol;Acc:HGNC:10901]
534	ENSG00000148737	TCF7L2	0.92254	0.545951	3.43989	0.00218979	0.118287	0.0928537	10 x 7		10 q25	transcription factor 7 like 2 [Source:HGNC Symbol;Acc:HGNC:11641]
535	ENSG00000156564	LRFN2	-1.75119	-0.580639	-3.41698	0.00220413	0.118287	0.0929838	4 x 35		6 p21	leucine rich repeat and fibronectin type III domain containing 2 [Source:HGNC Symbol;Acc:HGNC:21226]
536	ENSG00000114654	EFCC1	-1.9407	-0.607681	-3.4224	0.00220559	0.118287	0.092997	5 x 40	K	3 q21	EF-hand and coiled-coil domain containing 1 [Source:HGNC Symbol;Acc:HGNC:25692]
537	ENSG00000183283	DAZAP2	-0.741658	-0.318781	-3.45724	0.00220754	0.118287	0.0930146	15 x 37		12 q13	DAZ associated protein 2 [Source:HGNC Symbol;Acc:HGNC:2684]
538	ENSG00000232640		0.789323	0.45688	3.4449	0.00220935	0.118287	0.0930309	31 x 31		6 q27
539	ENSG00000235872		-0.501393	-0.227234	-3.43226	0.00220939	0.118287	0.0930312	15 x 31		12 q15
540	ENSG00000188013		-1.43801	-0.520629	-3.48005	0.00221367	0.118287	0.0930697	1 x 3	H	17 p11
541	ENSG00000228544	CCDC183-AS1	-1.16782	-0.453518	-3.42191	0.00221491	0.118287	0.0930807	1 x 7	H	9 q34	CCDC183 antisense RNA 1 [Source:HGNC Symbol;Acc:HGNC:44105]
542	ENSG00000181634	TNFSF15	2.04048	1.42955	3.51032	0.00221805	0.118287	0.0931088	37 x 10		9 q32	TNF superfamily member 15 [Source:HGNC Symbol;Acc:HGNC:11931]
543	ENSG00000182010	RTKN2	1.05312	0.63661	3.51225	0.00222167	0.118287	0.0931411	39 x 26	A	10 q21	rhotekin 2 [Source:HGNC Symbol;Acc:HGNC:19364]
544	ENSG00000259793		-1.33392	-0.496458	-3.49751	0.00222262	0.118287	0.0931496	7 x 34		2 q37
545	ENSG00000258551	CRAT37	-0.802462	-0.340167	-3.49053	0.00222307	0.118287	0.0931536	9 x 35		15 q26	cervical cancer-associated transcript 37 [Source:NCBI gene;Acc:101926928]
546	ENSG00000102445	RUBCNL	1.29696	0.814791	3.52094	0.00222381	0.118287	0.0931602	30 x 1	F	13 q14	RUN and cysteine rich domain containing beclin 1 interacting protein like [Source:HGNC Symbol;Acc:HGNC:20420]
547	ENSG00000133193	FAM104A	-0.631539	-0.278217	-3.40767	0.00222726	0.118287	0.0931909	27 x 14		17 q25	family with sequence similarity 104 member A [Source:HGNC Symbol;Acc:HGNC:25918]
548	ENSG00000266969		0.703096	0.401069	3.4071	0.00222777	0.118287	0.0931954	30 x 19		18 p11
549	ENSG00000144045	DQX1	-2.08526	-0.623607	-3.42667	0.0022316	0.118287	0.0932293	28 x 31		2 p13	DEAQ-box RNA dependent ATPase 1 [Source:HGNC Symbol;Acc:HGNC:20410]
550	ENSG00000156968	MPV17L	-1.90203	-0.60273	-3.61441	0.00223662	0.118287	0.0932737	8 x 40	K	16 p13	MPV17 mitochondrial inner membrane protein like [Source:HGNC Symbol;Acc:HGNC:26827]
551	ENSG00000088899	LZTS3	1.52838	0.994598	3.40495	0.00224117	0.118287	0.0933137	21 x 24		20 p13	leucine zipper tumor suppressor family member 3 [Source:HGNC Symbol;Acc:HGNC:30139]
552	ENSG00000184508	HDDC3	-0.692069	-0.300806	-3.41301	0.00224841	0.118287	0.0933772	40 x 38		15 q26	HD domain containing 3 [Source:HGNC Symbol;Acc:HGNC:30522]
553	ENSG00000167723	TRPV3	1.75905	1.1842	3.45833	0.00225083	0.118287	0.0933984	33 x 25	B	17 p13	transient receptor potential cation channel subfamily V member 3 [Source:HGNC Symbol;Acc:HGNC:18084]
554	ENSG00000235078		0.687087	0.390866	3.51057	0.00226161	0.118287	0.0934921	23 x 24		2 p25
555	ENSG00000260896	LINC02170	0.807059	0.468539	3.46285	0.00226334	0.118287	0.0935071	34 x 18		16 q23	long intergenic non-protein coding RNA 2170 [Source:HGNC Symbol;Acc:HGNC:53032]
556	ENSG00000279255		-0.702424	-0.304599	-3.41061	0.00226395	0.118287	0.0935124	3 x 25		16 p13
557	ENSG00000022277	RTFDC1	-0.498606	-0.226106	-3.40195	0.00226592	0.118287	0.0935294	27 x 34		20 q13	replication termination factor 2 domain containing 1 [Source:HGNC Symbol;Acc:HGNC:15890]
558	ENSG00000178665	ZNF713	0.695867	0.396456	3.47753	0.00227088	0.134519	0.0935722	5 x 18		7 p11	zinc finger protein 713 [Source:HGNC Symbol;Acc:HGNC:22043]
559	ENSG00000251491		0.336732	0.180076	3.62563	0.00228796	0.134519	0.0937852	19 x 28		2 q24	olfactory receptor family 7 subfamily E member 28 pseudogene [Source:HGNC Symbol;Acc:HGNC:8400]
560	ENSG00000280027		-1.44276	-0.521683	-3.43487	0.00229611	0.134519	0.0938862	9 x 37		16 q12
561	ENSG00000141294	LRRC46	-1.4105	-0.514447	-3.41516	0.00229757	0.134519	0.0939042	1 x 40		17 q21	leucine rich repeat containing 46 [Source:HGNC Symbol;Acc:HGNC:25047]
562	ENSG00000205363	C15orf59	-1.91613	-0.604568	-3.41787	0.00229802	0.134519	0.0939098	4 x 1		15 q24	chromosome 15 open reading frame 59 [Source:HGNC Symbol;Acc:HGNC:33753]
563	ENSG00000143554	SLC27A3	-1.08189	-0.429195	-3.46767	0.00231327	0.134519	0.0940971	18 x 16		1 q21	solute carrier family 27 member 3 [Source:HGNC Symbol;Acc:HGNC:10997]
564	ENSG00000149231	CCDC82	0.884052	0.519862	3.4161	0.00231942	0.134519	0.0941721	35 x 18		11 q21	coiled-coil domain containing 82 [Source:HGNC Symbol;Acc:HGNC:26282]
565	ENSG00000242540		0.994436	0.595456	3.72385	0.00232381	0.134519	0.0942254	32 x 26	B	2 p25
566	ENSG00000143643	TTC13	0.785548	0.454406	3.40835	0.00233525	0.134519	0.094364	30 x 20		1 q42	tetratricopeptide repeat domain 13 [Source:HGNC Symbol;Acc:HGNC:26204]
567	ENSG00000074219	TEAD2	1.36796	0.868849	3.53362	0.00233942	0.134519	0.0944142	33 x 23	B	19 q13	TEA domain transcription factor 2 [Source:HGNC Symbol;Acc:HGNC:11715]
568	ENSG00000278385		-1.05954	-0.422633	-3.38615	0.00235004	0.134519	0.0945415	5 x 37		12 q13
569	ENSG00000149476	TKFC	-0.806941	-0.341714	-3.41202	0.00235901	0.134519	0.0946485	8 x 34		11 q12	triokinase and FMN cyclase [Source:HGNC Symbol;Acc:HGNC:24552]
570	ENSG00000236915		0.378276	0.203822	3.45848	0.00236126	0.134519	0.0946753	18 x 30		1 p22
571	ENSG00000101911	PRPS2	1.02628	0.617707	3.39528	0.00236292	0.134519	0.0946949	32 x 15		X p22	phosphoribosyl pyrophosphate synthetase 2 [Source:HGNC Symbol;Acc:HGNC:9465]
572	ENSG00000204110		-0.699779	-0.303633	-3.40646	0.00237419	0.134519	0.0948282	31 x 10		6 p21	long intergenic non-protein coding RNA 2520 [Source:HGNC Symbol;Acc:HGNC:53511]
573	ENSG00000176153	GPX2	-2.10269	-0.625253	-3.51704	0.00238625	0.134519	0.0949698	23 x 32		14 q23	glutathione peroxidase 2 [Source:HGNC Symbol;Acc:HGNC:4554]
574	ENSG00000258011		0.418211	0.226966	3.39559	0.00239069	0.134519	0.0950217	25 x 35		12 q24
575	ENSG00000121570	DPPA4	0.560546	0.311977	3.47476	0.00240405	0.134519	0.095177	24 x 29		3 q13	developmental pluripotency associated 4 [Source:HGNC Symbol;Acc:HGNC:19200]
576	ENSG00000269887		-1.74783	-0.580097	-3.4042	0.00240444	0.134519	0.0951815	8 x 36		1 q23
577	ENSG00000111057	KRT18	-1.70214	-0.572501	-3.37509	0.00241886	0.134519	0.0953477	13 x 40		12 q13	keratin 18 [Source:HGNC Symbol;Acc:HGNC:6430]
578	ENSG00000268104	SLC6A14	2.794	2.16237	3.38152	0.00242576	0.134519	0.0954268	40 x 19	C	X q23	solute carrier family 6 member 14 [Source:HGNC Symbol;Acc:HGNC:11047]
579	ENSG00000171365	CLCN5	0.845748	0.494185	3.39993	0.0024282	0.134519	0.0954547	39 x 21	C	X p11	chloride voltage-gated channel 5 [Source:HGNC Symbol;Acc:HGNC:2023]
580	ENSG00000081791	KIAA0141	-0.494137	-0.224295	-3.37207	0.002434	0.134519	0.0955208	16 x 37		5 q31	KIAA0141 [Source:HGNC Symbol;Acc:HGNC:28969]
581	ENSG00000175662	TOM1L2	-0.816337	-0.344946	-3.37251	0.00244689	0.134519	0.0956669	3 x 5	H	17 p11	target of myb1 like 2 membrane trafficking protein [Source:HGNC Symbol;Acc:HGNC:11984]
582	ENSG00000214694	ARHGEF33	0.895839	0.527821	3.44851	0.00244941	0.134519	0.0956953	25 x 26		2 p22	Rho guanine nucleotide exchange factor 33 [Source:HGNC Symbol;Acc:HGNC:37252]
583	ENSG00000065361	ERBB3	-1.2476	-0.474812	-3.40869	0.00245014	0.134519	0.0957035	10 x 39	K	12 q13	erb-b2 receptor tyrosine kinase 3 [Source:HGNC Symbol;Acc:HGNC:3431]
584	ENSG00000103248	MTHFSD	0.600311	0.336432	3.43743	0.0024521	0.134519	0.0957256	21 x 21		16 q24	methenyltetrahydrofolate synthetase domain containing [Source:HGNC Symbol;Acc:HGNC:25778]
585	ENSG00000213420	GPC2	1.6446	1.08883	3.39694	0.00245657	0.134519	0.0957759	32 x 26	B	7 q22	glypican 2 [Source:HGNC Symbol;Acc:HGNC:4450]
586	ENSG00000117643	MAN1C1	-1.11715	-0.43935	-3.36701	0.0024615	0.134519	0.0958311	3 x 2	H	1 p36	mannosidase alpha class 1C member 1 [Source:HGNC Symbol;Acc:HGNC:19080]
587	ENSG00000130643	CALY	-1.17209	-0.454689	-3.57524	0.00247186	0.134519	0.0959468	28 x 30		10 q26	calcyon neuron specific vesicular protein [Source:HGNC Symbol;Acc:HGNC:17938]
588	ENSG00000231817		2.36121	1.72795	3.72856	0.00249063	0.134519	0.0961546	36 x 22	B	13 q14	long intergenic non-protein coding RNA 1198 [Source:HGNC Symbol;Acc:HGNC:49598]
589	ENSG00000107485	GATA3	-2.33174	-0.641382	-3.44482	0.00249241	0.134519	0.0961742	13 x 40		10 p14	GATA binding protein 3 [Source:HGNC Symbol;Acc:HGNC:4172]
590	ENSG00000158220	ESYT3	1.99548	1.38928	3.3798	0.00249478	0.134519	0.0962002	37 x 22	C	3 q22	extended synaptotagmin 3 [Source:HGNC Symbol;Acc:HGNC:24295]
591	ENSG00000101213	PTK6	-2.24698	-0.636604	-3.36474	0.00249486	0.134519	0.0962011	13 x 40		20 q13	protein tyrosine kinase 6 [Source:HGNC Symbol;Acc:HGNC:9617]
592	ENSG00000253483		0.464738	0.254321	3.37159	0.00249519	0.134519	0.0962048	10 x 11		8 p21
593	ENSG00000276984		-0.5376	-0.241749	-3.3666	0.00251119	0.134519	0.0963796	16 x 37		16 p13
594	ENSG00000261204		0.505117	0.278403	3.40802	0.00251724	0.134519	0.0964454	17 x 19		19 p13
595	ENSG00000205352	PRR13	-0.794489	-0.337404	-3.43423	0.00252175	0.134519	0.0964942	16 x 40		12 q13	proline rich 13 [Source:HGNC Symbol;Acc:HGNC:24528]
596	ENSG00000173320	STOX2	1.36637	0.86763	3.39627	0.00253391	0.134519	0.0966252	11 x 4		4 q35	storkhead box 2 [Source:HGNC Symbol;Acc:HGNC:25450]
597	ENSG00000183765	CHEK2	0.990665	0.592835	3.41893	0.00253536	0.134519	0.0966408	38 x 28	A	22 q12	checkpoint kinase 2 [Source:HGNC Symbol;Acc:HGNC:16627]
598	ENSG00000174177	CTU2	0.809267	0.469995	3.38068	0.00253622	0.134519	0.09665	40 x 35		16 q24	cytosolic thiouridylase subunit 2 [Source:HGNC Symbol;Acc:HGNC:28005]
599	ENSG00000157823	AP3S2	-0.747739	-0.320952	-3.41014	0.00254839	0.134519	0.0967801	12 x 36		15 q26	adaptor related protein complex 3 sigma 2 subunit [Source:HGNC Symbol;Acc:HGNC:571]
600	ENSG00000144681	STAC	1.91906	1.3218	3.44578	0.00255055	0.134519	0.0968032	40 x 17	C	3 p22	SH3 and cysteine rich domain [Source:HGNC Symbol;Acc:HGNC:11353]
601	ENSG00000113558	SKP1	-0.549068	-0.246293	-3.35106	0.00256401	0.134519	0.0969459	19 x 40		5 q31	S-phase kinase associated protein 1 [Source:HGNC Symbol;Acc:HGNC:10899]
602	ENSG00000163607	GTPBP8	0.622734	0.350358	3.37423	0.00257248	0.134519	0.0970351	33 x 19		3 q13	GTP binding protein 8 (putative) [Source:HGNC Symbol;Acc:HGNC:25007]
603	ENSG00000181513	ACBD4	-0.875406	-0.364873	-3.35367	0.0025797	0.134519	0.0971108	6 x 32		17 q21	acyl-CoA binding domain containing 4 [Source:HGNC Symbol;Acc:HGNC:23337]
604	ENSG00000141448	GATA6	1.62066	1.0692	3.35097	0.0025807	0.134519	0.0971213	37 x 11		18 q11	GATA binding protein 6 [Source:HGNC Symbol;Acc:HGNC:4174]
605	ENSG00000260586		-0.581987	-0.259195	-3.41538	0.00259894	0.134519	0.0973111	11 x 34		15 q23
606	ENSG00000070669	ASNS	1.47965	0.955871	3.35179	0.00260343	0.134519	0.0973576	37 x 29		7 q21	asparagine synthetase (glutamine-hydrolyzing) [Source:HGNC Symbol;Acc:HGNC:753]
607	ENSG00000100938	GMPR2	-0.56605	-0.252975	-3.35152	0.00261097	0.134519	0.0974353	18 x 39		14 q12	guanosine monophosphate reductase 2 [Source:HGNC Symbol;Acc:HGNC:4377]
608	ENSG00000278973		0.342811	0.18353	3.77934	0.00261859	0.134519	0.0975135	17 x 12		12 q24
609	ENSG00000120727	PAIP2	-0.464038	-0.211992	-3.35382	0.00262421	0.134519	0.097571	20 x 39		5 q31	poly(A) binding protein interacting protein 2 [Source:HGNC Symbol;Acc:HGNC:17970]
610	ENSG00000265178	MIR4728	-0.410489	-0.189667	-3.36758	0.00262459	0.134519	0.0975749	13 x 30		17 q12	microRNA 4728 [Source:HGNC Symbol;Acc:HGNC:41632]
611	ENSG00000103187	COTL1	1.3246	0.835717	3.38518	0.00263262	0.134519	0.0976567	34 x 4		16 q24	coactosin like F-actin binding protein 1 [Source:HGNC Symbol;Acc:HGNC:18304]
612	ENSG00000277459		0.645346	0.3645	3.43666	0.00263432	0.134519	0.097674	31 x 34		11 q22
613	ENSG00000073969	NSF	-0.776697	-0.331192	-3.34173	0.00263643	0.134519	0.0976954	1 x 13	I	17 q21	N-ethylmaleimide sensitive factor, vesicle fusing ATPase [Source:HGNC Symbol;Acc:HGNC:8016]
614	ENSG00000141699	RETREG3	-0.768698	-0.32838	-3.33913	0.00264075	0.134519	0.0977392	24 x 14		17 q21	reticulophagy regulator family member 3 [Source:HGNC Symbol;Acc:HGNC:27258]
615	ENSG00000223776	LGALS8-AS1	-1.03855	-0.416383	-3.46903	0.00264441	0.134519	0.0977762	8 x 35		1 q43	LGALS8 antisense RNA 1 [Source:HGNC Symbol;Acc:HGNC:40340]
616	ENSG00000099812	MISP	-2.9339	-0.635073	-3.33951	0.00264805	0.134519	0.0978129	13 x 40		19 p13	mitotic spindle positioning [Source:HGNC Symbol;Acc:HGNC:27000]
617	ENSG00000164220	F2RL2	-2.04246	-0.619315	-3.34679	0.00265291	0.134519	0.0978619	20 x 3	G	5 q13	coagulation factor II thrombin receptor like 2 [Source:HGNC Symbol;Acc:HGNC:3539]
618	ENSG00000124177	CHD6	-0.811221	-0.343188	-3.38162	0.00265314	0.134519	0.0978642	1 x 6	H	20 q12	chromodomain helicase DNA binding protein 6 [Source:HGNC Symbol;Acc:HGNC:19057]
619	ENSG00000171757	LRRC34	1.36926	0.86985	3.60988	0.00265415	0.134519	0.0978743	24 x 26		3 q26	leucine rich repeat containing 34 [Source:HGNC Symbol;Acc:HGNC:28408]
620	ENSG00000203697	CAPN8	-1.92553	-0.605773	-3.33754	0.00265569	0.134519	0.0978898	9 x 40	K	1 q41	calpain 8 [Source:HGNC Symbol;Acc:HGNC:1485]
621	ENSG00000273492		1.13744	0.696915	3.35452	0.00267652	0.134519	0.0980976	21 x 25		21 q21
622	ENSG00000183831	ANKRD45	1.36351	0.865433	3.5039	0.00268378	0.134519	0.0981696	29 x 25		1 q25	ankyrin repeat domain 45 [Source:HGNC Symbol;Acc:HGNC:24786]
623	ENSG00000102001	CACNA1F	-1.20678	-0.464073	-3.49761	0.00268553	0.134519	0.0981869	4 x 28		X p11	calcium voltage-gated channel subunit alpha1 F [Source:HGNC Symbol;Acc:HGNC:1393]
624	ENSG00000062725	APPBP2	-0.783853	-0.333698	-3.34491	0.00270008	0.134519	0.09833	1 x 15	I	17 q23	amyloid beta precursor protein binding protein 2 [Source:HGNC Symbol;Acc:HGNC:622]
625	ENSG00000184999	SLC22A10	-0.868461	-0.362566	-3.36442	0.00271933	0.134519	0.0985176	9 x 35		11 q12	solute carrier family 22 member 10 [Source:HGNC Symbol;Acc:HGNC:18057]
626	ENSG00000127152	BCL11B	1.37493	0.874206	3.3277	0.00272742	0.134519	0.0985958	38 x 3	E	14 q32	B-cell CLL/lymphoma 11B [Source:HGNC Symbol;Acc:HGNC:13222]
627	ENSG00000184454	NCMAP	2.11787	1.49972	3.35495	0.00273535	0.134519	0.0986723	39 x 19	C	1 p36	non-compact myelin associated protein [Source:HGNC Symbol;Acc:HGNC:29332]
628	ENSG00000182459	TEX19	-1.31725	-0.492391	-3.54649	0.00273917	0.134519	0.0987089	40 x 30	A	17 q25	testis expressed 19 [Source:HGNC Symbol;Acc:HGNC:33802]
629	ENSG00000059758	CDK17	-0.637492	-0.280471	-3.36244	0.00273947	0.134519	0.0987118	1 x 17		12 q23	cyclin dependent kinase 17 [Source:HGNC Symbol;Acc:HGNC:8750]
630	ENSG00000139304	PTPRQ	-1.26171	-0.47845	-3.33168	0.00274029	0.134519	0.0987196	2 x 33		12 q21	protein tyrosine phosphatase, receptor type Q [Source:HGNC Symbol;Acc:HGNC:9679]
631	ENSG00000186767	SPIN4	0.953491	0.567139	3.43521	0.0027437	0.134519	0.0987524	30 x 17		X q11	spindlin family member 4 [Source:HGNC Symbol;Acc:HGNC:27040]
632	ENSG00000196636	SDHAF3	1.40233	0.895365	3.33394	0.00274671	0.134519	0.0987811	35 x 18		7 q21	succinate dehydrogenase complex assembly factor 3 [Source:HGNC Symbol;Acc:HGNC:21752]
633	ENSG00000176563	CNTD1	-1.049	-0.419504	-3.36312	0.00275582	0.134519	0.098868	5 x 33		17 q21	cyclin N-terminal domain containing 1 [Source:HGNC Symbol;Acc:HGNC:26847]
634	ENSG00000266441		0.635729	0.358473	3.37769	0.0027577	0.134519	0.0988858	30 x 36		18 p11
635	ENSG00000096063	SRPK1	0.804205	0.466659	3.32698	0.00276578	0.134519	0.0989624	30 x 19		6 p21	SRSF protein kinase 1 [Source:HGNC Symbol;Acc:HGNC:11305]
636	ENSG00000106541	AGR2	-3.76467	-0.510508	-3.33373	0.00276601	0.134519	0.0989646	8 x 40	K	7 p21	anterior gradient 2, protein disulphide isomerase family member [Source:HGNC Symbol;Acc:HGNC:328]
637	ENSG00000186007	LEMD1	2.02736	1.41777	3.54853	0.00276783	0.134519	0.0989817	40 x 14	D	1 q32	LEM domain containing 1 [Source:HGNC Symbol;Acc:HGNC:18725]
638	ENSG00000254786		0.726788	0.41626	3.32071	0.0027787	0.134519	0.0990841	10 x 10		11 q12
639	ENSG00000113595	TRIM23	-0.573203	-0.255773	-3.38265	0.00277912	0.134519	0.0990881	1 x 16	I	5 q12	tripartite motif containing 23 [Source:HGNC Symbol;Acc:HGNC:660]
640	ENSG00000050438	SLC4A8	-2.23957	-0.636119	-3.43652	0.00278412	0.134519	0.099135	1 x 36		12 q13	solute carrier family 4 member 8 [Source:HGNC Symbol;Acc:HGNC:11034]
641	ENSG00000204277	LINC01993	0.617086	0.34684	3.32592	0.00278929	0.134519	0.0991834	14 x 24		17 q25	long intergenic non-protein coding RNA 1993 [Source:HGNC Symbol;Acc:HGNC:52826]
642	ENSG00000272335		-1.57516	-0.54926	-3.44664	0.00279076	0.134519	0.0991971	1 x 25		5 p12
643	ENSG00000013561	RNF14	-0.509349	-0.230445	-3.31579	0.00279557	0.134519	0.099242	27 x 13		5 q31	ring finger protein 14 [Source:HGNC Symbol;Acc:HGNC:10058]
644	ENSG00000270571		-1.30841	-0.490213	-3.36032	0.002814	0.134519	0.0994127	13 x 35		2 p12
645	ENSG00000204385	SLC44A4	-3.00514	-0.629658	-3.31292	0.00281658	0.134519	0.0994364	9 x 40	K	6 p21	solute carrier family 44 member 4 [Source:HGNC Symbol;Acc:HGNC:13941]
646	ENSG00000176597	B3GNT5	1.89856	1.3039	3.3161	0.00282336	0.134519	0.0994987	35 x 23	B	3 q27	UDP-GlcNAc:betaGal beta-1,3-N-acetylglucosaminyltransferase 5 [Source:HGNC Symbol;Acc:HGNC:15684]
647	ENSG00000196660	SLC30A10	1.0254	0.617086	3.55555	0.00282787	0.134519	0.09954	27 x 24		1 q41	solute carrier family 30 member 10 [Source:HGNC Symbol;Acc:HGNC:25355]
648	ENSG00000280734		0.712932	0.407362	3.30866	0.00285033	0.134519	0.0997445	36 x 12		13 q32	long intergenic non-protein coding RNA 1232 [Source:HGNC Symbol;Acc:HGNC:49755]
649	ENSG00000162460	TMEM82	-0.583916	-0.259944	-3.40033	0.00285441	0.134519	0.0997813	15 x 37		1 p36	transmembrane protein 82 [Source:HGNC Symbol;Acc:HGNC:32350]
650	ENSG00000266412	NCOA4	-0.615123	-0.271968	-3.30675	0.00285803	0.134519	0.099814	1 x 13	I	10 q11	nuclear receptor coactivator 4 [Source:HGNC Symbol;Acc:HGNC:7671]
651	ENSG00000257271		2.13866	1.51877	3.38968	0.00285952	0.134519	0.0998274	29 x 24		11 q24	KIRREL3 antisense RNA 1 [Source:HGNC Symbol;Acc:HGNC:42655]
652	ENSG00000266846		0.750424	0.431524	3.31401	0.00286047	0.134519	0.0998359	35 x 19		18 p11
653	ENSG00000118503	TNFAIP3	1.02665	0.617966	3.38646	0.00286385	0.134519	0.0998663	38 x 7	E	6 q23	TNF alpha induced protein 3 [Source:HGNC Symbol;Acc:HGNC:11896]
654	ENSG00000011422	PLAUR	1.14696	0.703814	3.3386	0.00287465	0.134519	0.0999631	26 x 3	G	19 q13	plasminogen activator, urokinase receptor [Source:HGNC Symbol;Acc:HGNC:9053]
655	ENSG00000153250	RBMS1	0.556039	0.309225	3.32266	0.00288107	0.134519	0.10002	11 x 7		2 q24	RNA binding motif single stranded interacting protein 1 [Source:HGNC Symbol;Acc:HGNC:9907]
656	ENSG00000180806	HOXC9	-0.830431	-0.349762	-3.43084	0.00288394	0.134519	0.100046	20 x 9		12 q13	homeobox C9 [Source:HGNC Symbol;Acc:HGNC:5130]
657	ENSG00000213144		-0.964254	-0.393567	-3.44772	0.00288439	0.134519	0.10005	25 x 13		12 q24
658	ENSG00000134802	SLC43A3	1.53606	1.00074	3.33596	0.00289233	0.134519	0.10012	40 x 10	D	11 q12	solute carrier family 43 member 3 [Source:HGNC Symbol;Acc:HGNC:17466]
659	ENSG00000152804	HHEX	-1.44464	-0.522097	-3.45238	0.00289758	0.134519	0.100167	30 x 6		10 q23	hematopoietically expressed homeobox [Source:HGNC Symbol;Acc:HGNC:4901]
660	ENSG00000161642	ZNF385A	-1.18574	-0.458409	-3.30099	0.00290283	0.134519	0.100213	21 x 11		12 q13	zinc finger protein 385A [Source:HGNC Symbol;Acc:HGNC:17521]
661	ENSG00000067715	SYT1	-2.13739	-0.628352	-3.32049	0.00290434	0.134519	0.100226	1 x 1		12 q21	synaptotagmin 1 [Source:HGNC Symbol;Acc:HGNC:11509]
662	ENSG00000148426	PROSER2	-0.795401	-0.33772	-3.29885	0.00291598	0.134519	0.100328	21 x 14		10 p14	proline and serine rich 2 [Source:HGNC Symbol;Acc:HGNC:23728]
663	ENSG00000272682		0.516597	0.285307	3.34645	0.00291766	0.134519	0.100343	18 x 27		22 q11
664	ENSG00000102910	LONP2	-1.06747	-0.424971	-3.30191	0.00292482	0.134519	0.100405	1 x 12	I	16 q12	lon peptidase 2, peroxisomal [Source:HGNC Symbol;Acc:HGNC:20598]
665	ENSG00000261693		-1.10407	-0.435612	-3.31492	0.00293902	0.134519	0.100529	26 x 14		8 q24
666	ENSG00000010310	GIPR	-1.25248	-0.476075	-3.35802	0.00294111	0.134519	0.100547	4 x 27		19 q13	gastric inhibitory polypeptide receptor [Source:HGNC Symbol;Acc:HGNC:4271]
667	ENSG00000272970		1.37994	0.878067	3.46226	0.00294991	0.134519	0.100623	24 x 25		3 q27
668	ENSG00000235574		0.456199	0.249269	3.29459	0.0029552	0.134519	0.100668	15 x 15		7 p15
669	ENSG00000172530	BANP	0.45394	0.247935	3.2971	0.00295977	0.134519	0.100707	21 x 20		16 q24	BTG3 associated nuclear protein [Source:HGNC Symbol;Acc:HGNC:13450]
670	ENSG00000105518	TMEM205	-1.20641	-0.463972	-3.29522	0.00296266	0.134519	0.100732	17 x 40		19 p13	transmembrane protein 205 [Source:HGNC Symbol;Acc:HGNC:29631]
671	ENSG00000278621		-2.4972	-0.646681	-3.37298	0.00296283	0.134519	0.100733	2 x 3	H	15 q14
672	ENSG00000113141	IK	-0.356662	-0.166665	-3.29285	0.00296445	0.134519	0.100747	14 x 36		5 q31	IK cytokine, down-regulator of HLA II [Source:HGNC Symbol;Acc:HGNC:5958]
673	ENSG00000106113	CRHR2	-0.514247	-0.232416	-3.2918	0.00296467	0.134519	0.100749	24 x 27		7 p14	corticotropin releasing hormone receptor 2 [Source:HGNC Symbol;Acc:HGNC:2358]
674	ENSG00000148734	NPFFR1	1.34648	0.852387	3.39141	0.00296611	0.134519	0.100761	39 x 21	C	10 q22	neuropeptide FF receptor 1 [Source:HGNC Symbol;Acc:HGNC:17425]
675	ENSG00000139160	ETFBKMT	-0.753147	-0.322877	-3.35044	0.00296849	0.134519	0.100781	6 x 34		12 p11	electron transfer flavoprotein beta subunit lysine methyltransferase [Source:HGNC Symbol;Acc:HGNC:28739]
676	ENSG00000224800		0.457201	0.249861	3.30456	0.00297251	0.134519	0.100816	19 x 29		1 q21	ribosomal protein S27a pseudogene 6 [Source:HGNC Symbol;Acc:HGNC:36236]
677	ENSG00000229870		-0.518425	-0.234094	-3.29231	0.00297392	0.134519	0.100828	14 x 32		10 q11	ribosomal protein L21 pseudogene 89 [Source:HGNC Symbol;Acc:HGNC:36474]
678	ENSG00000080293	SCTR	-0.461184	-0.210816	-3.30286	0.00298245	0.134519	0.1009	25 x 28		2 q14	secretin receptor [Source:HGNC Symbol;Acc:HGNC:10608]
679	ENSG00000129514	FOXA1	-3.10593	-0.620309	-3.33639	0.00298766	0.134519	0.100944	9 x 40	K	14 q21	forkhead box A1 [Source:HGNC Symbol;Acc:HGNC:5021]
680	ENSG00000078081	LAMP3	2.27987	1.65039	3.29599	0.00299031	0.134519	0.100966	40 x 5	E	3 q27	lysosomal associated membrane protein 3 [Source:HGNC Symbol;Acc:HGNC:14582]
681	ENSG00000071564	TCF3	0.713482	0.407715	3.29632	0.00299195	0.134519	0.10098	22 x 20		19 p13	transcription factor 3 [Source:HGNC Symbol;Acc:HGNC:11633]
682	ENSG00000279741		-1.10452	-0.435738	-3.3253	0.00300147	0.134519	0.10106	9 x 37		16 q12
683	ENSG00000146072	TNFRSF21	1.09561	0.666825	3.30301	0.0030022	0.141363	0.101066	40 x 18	C	6 p12	TNF receptor superfamily member 21 [Source:HGNC Symbol;Acc:HGNC:13469]
684	ENSG00000103194	USP10	0.526723	0.291419	3.28578	0.0030163	0.141363	0.101201	27 x 18		16 q24	ubiquitin specific peptidase 10 [Source:HGNC Symbol;Acc:HGNC:12608]
685	ENSG00000140522	RLBP1	1.56205	1.02163	3.41418	0.00302125	0.141363	0.101248	35 x 21	B	15 q26	retinaldehyde binding protein 1 [Source:HGNC Symbol;Acc:HGNC:10024]
686	ENSG00000137501	SYTL2	-1.13851	-0.445383	-3.29011	0.00303028	0.141363	0.101334	2 x 2	H	11 q14	synaptotagmin like 2 [Source:HGNC Symbol;Acc:HGNC:15585]
687	ENSG00000211452	DIO1	-2.67937	-0.646352	-3.36465	0.00304332	0.141363	0.101457	9 x 40	K	1 p32	iodothyronine deiodinase 1 [Source:HGNC Symbol;Acc:HGNC:2883]
688	ENSG00000227172		0.321727	0.171582	3.29289	0.0030741	0.141363	0.101744	19 x 31		7 p14
689	ENSG00000101210	EEF1A2	-3.49068	-0.566438	-3.31623	0.00307682	0.141363	0.10177	1 x 2	H	20 q13	eukaryotic translation elongation factor 1 alpha 2 [Source:HGNC Symbol;Acc:HGNC:3192]
690	ENSG00000232354		-0.854725	-0.357974	-3.29019	0.00307821	0.141363	0.101783	10 x 36		3 p22	VIPR1 antisense RNA 1 [Source:HGNC Symbol;Acc:HGNC:40610]
691	ENSG00000273451		-0.558799	-0.250129	-3.27566	0.00309416	0.141363	0.10193	6 x 20		20 q13
692	ENSG00000231066		0.751609	0.432292	3.27493	0.00309551	0.141363	0.101942	33 x 18		X p22	nucleophosmin 1 pseudogene 9 [Source:HGNC Symbol;Acc:HGNC:7929]
693	ENSG00000146592	CREB5	1.36267	0.864787	3.35265	0.00309639	0.141363	0.10195	12 x 4		7 p15	cAMP responsive element binding protein 5 [Source:HGNC Symbol;Acc:HGNC:16844]
694	ENSG00000139083	ETV6	0.847653	0.495455	3.31013	0.00311641	0.141363	0.102133	38 x 17		12 p13	ETS variant 6 [Source:HGNC Symbol;Acc:HGNC:3495]
695	ENSG00000233355	CHRM3-AS2	0.701497	0.400048	3.36179	0.00312018	0.141363	0.102167	35 x 6		1 q43	CHRM3 antisense RNA 2 [Source:HGNC Symbol;Acc:HGNC:43725]
696	ENSG00000237877	LINC01473	0.550566	0.305888	3.30601	0.00312907	0.141363	0.102248	17 x 27		2 q32	long intergenic non-protein coding RNA 1473 [Source:HGNC Symbol;Acc:HGNC:51109]
697	ENSG00000143297	FCRL5	1.25152	0.780707	3.33824	0.00313537	0.141363	0.102305	40 x 1	E	1 q23	Fc receptor like 5 [Source:HGNC Symbol;Acc:HGNC:18508]
698	ENSG00000130561	SAG	-0.823605	-0.347435	-3.2826	0.00313987	0.141363	0.102345	11 x 33		2 q37	S-antigen visual arrestin [Source:HGNC Symbol;Acc:HGNC:10521]
699	ENSG00000276600	RAB7B	1.29223	0.811221	3.38947	0.00314171	0.141363	0.102362	29 x 1		1 q32	RAB7B, member RAS oncogene family [Source:HGNC Symbol;Acc:HGNC:30513]
700	ENSG00000151892	GFRA1	-3.01202	-0.629083	-3.27107	0.00314504	0.141363	0.102392	2 x 1		10 q25	GDNF family receptor alpha 1 [Source:HGNC Symbol;Acc:HGNC:4243]
701	ENSG00000261592		0.387805	0.209317	3.26825	0.00314567	0.141363	0.102397	11 x 12		16 q24
702	ENSG00000251141		-2.72843	-0.645159	-3.46782	0.00314816	0.141363	0.10242	5 x 33		5 p12
703	ENSG00000146013	GFRA3	2.46597	1.82977	3.37485	0.00314918	0.141363	0.102429	33 x 25	B	5 q31	GDNF family receptor alpha 3 [Source:HGNC Symbol;Acc:HGNC:4245]
704	ENSG00000168890	TMEM150A	-0.793791	-0.337161	-3.39179	0.00316015	0.141363	0.102527	18 x 38		2 p11	transmembrane protein 150A [Source:HGNC Symbol;Acc:HGNC:24677]
705	ENSG00000029153	ARNTL2	1.60632	1.0575	3.40055	0.00317336	0.141363	0.102644	38 x 22	C	12 p11	aryl hydrocarbon receptor nuclear translocator like 2 [Source:HGNC Symbol;Acc:HGNC:18984]
706	ENSG00000109576	AADAT	1.52933	0.99536	3.32715	0.00318369	0.141363	0.102736	33 x 25	B	4 q33	aminoadipate aminotransferase [Source:HGNC Symbol;Acc:HGNC:17929]
707	ENSG00000124116	WFDC3	-0.795072	-0.337606	-3.27302	0.00319317	0.141363	0.102819	31 x 32		20 q13	WAP four-disulfide core domain 3 [Source:HGNC Symbol;Acc:HGNC:15957]
708	ENSG00000175664	TEX26	0.460499	0.251811	3.36329	0.0031954	0.141363	0.102839	23 x 29		13 q12	testis expressed 26 [Source:HGNC Symbol;Acc:HGNC:28622]
709	ENSG00000227374		0.450598	0.245963	3.26661	0.00320022	0.141363	0.102881	10 x 10		10 q26
710	ENSG00000232814	COL4A2-AS1	0.431014	0.234451	3.26711	0.00320452	0.141363	0.102918	14 x 22		13 q34	COL4A2 antisense RNA 1 [Source:HGNC Symbol;Acc:HGNC:40156]
711	ENSG00000088826	SMOX	1.12739	0.689654	3.25831	0.00322157	0.141363	0.103067	32 x 26	B	20 p13	spermine oxidase [Source:HGNC Symbol;Acc:HGNC:15862]
712	ENSG00000276075		-0.888262	-0.36912	-3.2752	0.00323451	0.141363	0.103179	17 x 40		16 q22
713	ENSG00000186868	MAPT	-2.51107	-0.646883	-3.25973	0.003237	0.141363	0.1032	2 x 1		17 q21	microtubule associated protein tau [Source:HGNC Symbol;Acc:HGNC:6893]
714	ENSG00000164761	TNFRSF11B	2.29789	1.66746	3.46828	0.00324829	0.141363	0.103297	27 x 5		8 q24	TNF receptor superfamily member 11b [Source:HGNC Symbol;Acc:HGNC:11909]
715	ENSG00000272462		1.03604	0.624561	3.26548	0.00325751	0.141363	0.103376	21 x 28		6 p22
716	ENSG00000138801	PAPSS1	0.945187	0.561436	3.27687	0.00327454	0.141363	0.10352	33 x 19		4 q25	3'-phosphoadenosine 5'-phosphosulfate synthase 1 [Source:HGNC Symbol;Acc:HGNC:8603]
717	ENSG00000229539		0.552442	0.307031	3.25628	0.00328288	0.141363	0.103591	30 x 32		20 p13
718	ENSG00000171475	WIPF2	-0.739525	-0.318017	-3.25947	0.00329286	0.141363	0.103675	1 x 12	I	17 q21	WAS/WASL interacting protein family member 2 [Source:HGNC Symbol;Acc:HGNC:30923]
719	ENSG00000262714		-1.50737	-0.535567	-3.25966	0.00330158	0.141363	0.103748	9 x 37		16 q12
720	ENSG00000257256		-0.451875	-0.20697	-3.36231	0.00332073	0.141363	0.103907	11 x 18		12 q13
721	ENSG00000164124	TMEM144	-0.914176	-0.377583	-3.24416	0.00333544	0.141363	0.104029	1 x 14	I	4 q32	transmembrane protein 144 [Source:HGNC Symbol;Acc:HGNC:25633]
722	ENSG00000044115	CTNNA1	-0.406507	-0.187985	-3.28473	0.00334073	0.141363	0.104072	25 x 11		5 q31	catenin alpha 1 [Source:HGNC Symbol;Acc:HGNC:2509]
723	ENSG00000047578	KIAA0556	-0.7438	-0.319546	-3.26985	0.00335965	0.141363	0.104227	2 x 23		16 p12	KIAA0556 [Source:HGNC Symbol;Acc:HGNC:29068]
724	ENSG00000160117	ANKLE1	1.18978	0.735042	3.36874	0.00336816	0.141363	0.104296	31 x 25	B	19 p13	ankyrin repeat and LEM domain containing 1 [Source:HGNC Symbol;Acc:HGNC:26812]
725	ENSG00000156049	GNA14	-1.49827	-0.533659	-3.34944	0.00336834	0.141363	0.104298	3 x 2	H	9 q21	G protein subunit alpha 14 [Source:HGNC Symbol;Acc:HGNC:4382]
726	ENSG00000111481	COPZ1	-0.530797	-0.239041	-3.30961	0.00337074	0.141363	0.104317	19 x 40		12 q13	coatomer protein complex subunit zeta 1 [Source:HGNC Symbol;Acc:HGNC:2243]
727	ENSG00000198795	ZNF521	1.3661	0.867422	3.33289	0.00337291	0.141363	0.104335	18 x 2	G	18 q11	zinc finger protein 521 [Source:HGNC Symbol;Acc:HGNC:24605]
728	ENSG00000168077	SCARA3	1.30983	0.824519	3.24982	0.00337635	0.141363	0.104363	38 x 12		8 p21	scavenger receptor class A member 3 [Source:HGNC Symbol;Acc:HGNC:19000]
729	ENSG00000134759	ELP2	-1.32472	-0.49422	-3.28645	0.00338714	0.141363	0.10445	1 x 18		18 q12	elongator acetyltransferase complex subunit 2 [Source:HGNC Symbol;Acc:HGNC:18248]
730	ENSG00000228903		-0.979608	-0.39837	-3.26938	0.00339253	0.141363	0.104493	6 x 30		7 p13	RAS p21 protein activator 4C, pseudogene [Source:HGNC Symbol;Acc:HGNC:44185]
731	ENSG00000231982		0.979094	0.584808	3.34547	0.00340128	0.141363	0.104563	32 x 33		3 q27
732	ENSG00000015520	NPC1L1	-1.46003	-0.525473	-3.30534	0.00340135	0.141363	0.104564	4 x 30		7 p13	NPC1 like intracellular cholesterol transporter 1 [Source:HGNC Symbol;Acc:HGNC:7898]
733	ENSG00000280832		1.023	0.615404	3.34026	0.00340464	0.141363	0.10459	34 x 31		11 q24	G-quadruplex forming sequence containing lncRNA [Source:HGNC Symbol;Acc:HGNC:48645]
734	ENSG00000233184		0.613747	0.344765	3.24702	0.00340685	0.141363	0.104608	19 x 26		1 p21
735	ENSG00000160307	S100B	2.2573	1.62908	3.23877	0.00341086	0.141363	0.10464	30 x 1	F	21 q22	S100 calcium binding protein B [Source:HGNC Symbol;Acc:HGNC:10500]
736	ENSG00000213213	CCDC183	-0.899289	-0.372737	-3.26299	0.00341696	0.141363	0.104688	7 x 31		9 q34	coiled-coil domain containing 183 [Source:HGNC Symbol;Acc:HGNC:28236]
737	ENSG00000233198	RNF224	-0.917447	-0.378642	-3.33026	0.00342062	0.141363	0.104718	4 x 32		9 q34	ring finger protein 224 [Source:HGNC Symbol;Acc:HGNC:41912]
738	ENSG00000122735	DNAI1	-1.67349	-0.567531	-3.25206	0.00342074	0.141363	0.104719	1 x 40		9 p13	dynein axonemal intermediate chain 1 [Source:HGNC Symbol;Acc:HGNC:2954]
739	ENSG00000143412	ANXA9	-1.73762	-0.578435	-3.23584	0.00342602	0.141363	0.10476	12 x 40	K	1 q21	annexin A9 [Source:HGNC Symbol;Acc:HGNC:547]
740	ENSG00000124702	KLHDC3	0.569802	0.317642	3.26019	0.00342944	0.141363	0.104787	34 x 29		6 p21	kelch domain containing 3 [Source:HGNC Symbol;Acc:HGNC:20704]
741	ENSG00000132517	SLC52A1	-1.37102	-0.505315	-3.23265	0.00343663	0.141363	0.104844	23 x 30		17 p13	solute carrier family 52 member 1 [Source:HGNC Symbol;Acc:HGNC:30225]
742	ENSG00000129951	PLPPR3	-2.31177	-0.640383	-3.24698	0.00343744	0.141363	0.104851	1 x 38		19 p13	phospholipid phosphatase related 3 [Source:HGNC Symbol;Acc:HGNC:23497]
743	ENSG00000122420	PTGFR	1.69191	1.12795	3.36596	0.00343807	0.141363	0.104855	16 x 1	G	1 p31	prostaglandin F receptor [Source:HGNC Symbol;Acc:HGNC:9600]
744	ENSG00000197771	MCMBP	0.701609	0.40012	3.25279	0.00344736	0.141363	0.104929	30 x 17		10 q26	minichromosome maintenance complex binding protein [Source:HGNC Symbol;Acc:HGNC:25782]
745	ENSG00000133422	MORC2	0.490121	0.269422	3.23071	0.00344819	0.141363	0.104935	23 x 19		22 q12	MORC family CW-type zinc finger 2 [Source:HGNC Symbol;Acc:HGNC:23573]
746	ENSG00000136888	ATP6V1G1	-0.916867	-0.378454	-3.24101	0.003457	0.141363	0.105004	19 x 40		9 q32	ATPase H+ transporting V1 subunit G1 [Source:HGNC Symbol;Acc:HGNC:864]
747	ENSG00000151376	ME3	0.943441	0.560239	3.25413	0.00345749	0.141363	0.105008	8 x 32		11 q14	malic enzyme 3 [Source:HGNC Symbol;Acc:HGNC:6985]
748	ENSG00000213062		-1.23793	-0.472298	-3.26424	0.00346579	0.141363	0.105073	1 x 5	H	1 q24
749	ENSG00000111328	CDK2AP1	0.851994	0.498352	3.30097	0.00346935	0.141363	0.1051	35 x 17		12 q24	cyclin dependent kinase 2 associated protein 1 [Source:HGNC Symbol;Acc:HGNC:14002]
750	ENSG00000113758	DBN1	0.778091	0.449528	3.23551	0.00347673	0.141363	0.105158	32 x 27		5 q35	drebrin 1 [Source:HGNC Symbol;Acc:HGNC:2695]
751	ENSG00000246528	LOC101929759	1.20813	0.748542	3.58157	0.00347987	0.141363	0.105182	32 x 22	B	8 q13
752	ENSG00000141564	RPTOR	-0.810408	-0.342908	-3.24281	0.00349145	0.141363	0.105271	23 x 17		17 q25	regulatory associated protein of MTOR complex 1 [Source:HGNC Symbol;Acc:HGNC:30287]
753	ENSG00000198732	SMOC1	2.92981	2.30619	3.25557	0.00349497	0.141363	0.105298	33 x 24	B	14 q24	SPARC related modular calcium binding 1 [Source:HGNC Symbol;Acc:HGNC:20318]
754	ENSG00000130005	GAMT	-1.66492	-0.566014	-3.26153	0.00350254	0.141363	0.105356	16 x 40		19 p13	guanidinoacetate N-methyltransferase [Source:HGNC Symbol;Acc:HGNC:4136]
755	ENSG00000183837	PNMA3	2.0095	1.40179	3.24279	0.00350973	0.141363	0.105411	32 x 25	B	X q28	paraneoplastic Ma antigen 3 [Source:HGNC Symbol;Acc:HGNC:18742]
756	ENSG00000129993	CBFA2T3	-1.53004	-0.540245	-3.28736	0.00351759	0.141363	0.105471	2 x 3	H	16 q24	CBFA2/RUNX1 translocation partner 3 [Source:HGNC Symbol;Acc:HGNC:1537]
757	ENSG00000260577		0.902488	0.532323	3.22394	0.00351809	0.141363	0.105475	29 x 24		16 q22
758	ENSG00000265246		-1.44897	-0.523053	-3.41709	0.0035192	0.141363	0.105484	17 x 38		17 q11
759	ENSG00000185442	FAM174B	-1.37878	-0.507133	-3.24657	0.00352181	0.141363	0.105503	9 x 40	K	15 q26	family with sequence similarity 174 member B [Source:HGNC Symbol;Acc:HGNC:34339]
760	ENSG00000180901	KCTD2	-0.738557	-0.317671	-3.22261	0.00352322	0.141363	0.105514	24 x 14		17 q25	potassium channel tetramerization domain containing 2 [Source:HGNC Symbol;Acc:HGNC:21294]
761	ENSG00000163293	NIPAL1	1.46865	0.947196	3.22797	0.00352617	0.141363	0.105536	39 x 20	C	4 p12	NIPA like domain containing 1 [Source:HGNC Symbol;Acc:HGNC:27194]
762	ENSG00000272181		0.450774	0.246067	3.22127	0.00352716	0.141363	0.105544	14 x 26		3 p14
763	ENSG00000232133		0.396332	0.214248	3.32119	0.00353193	0.141363	0.10558	15 x 18		2 q33	inosine monophosphate dehydrogenase 1 pseudogene 10 [Source:HGNC Symbol;Acc:HGNC:33965]
764	ENSG00000167447	SMG8	-0.77045	-0.328997	-3.2276	0.00353451	0.141363	0.1056	27 x 16		17 q22	SMG8, nonsense mediated mRNA decay factor [Source:HGNC Symbol;Acc:HGNC:25551]
765	ENSG00000272483		-0.308274	-0.145506	-3.26552	0.00353519	0.141363	0.105605	13 x 17		3 p25
766	ENSG00000117569	PTBP2	0.802305	0.465408	3.28399	0.00353601	0.141363	0.105611	15 x 26		1 p21	polypyrimidine tract binding protein 2 [Source:HGNC Symbol;Acc:HGNC:17662]
767	ENSG00000214207		-0.778604	-0.331861	-3.23021	0.00353773	0.141363	0.105624	23 x 40		Y p11	keratin 18 pseudogene 10 [Source:HGNC Symbol;Acc:HGNC:23962]
768	ENSG00000084444	FAM234B	-1.84682	-0.595158	-3.23565	0.00355054	0.141363	0.10572	2 x 35		12 p13	family with sequence similarity 234 member B [Source:HGNC Symbol;Acc:HGNC:29288]
769	ENSG00000180596	HIST1H2BC	-1.64093	-0.561689	-3.25131	0.00355127	0.141363	0.105726	16 x 40		6 p22	histone cluster 1 H2B family member c [Source:HGNC Symbol;Acc:HGNC:4757]
770	ENSG00000169087	HSPBAP1	0.597242	0.334534	3.2759	0.00355297	0.141363	0.105739	17 x 27		3 q21	HSPB1 associated protein 1 [Source:HGNC Symbol;Acc:HGNC:16389]
771	ENSG00000260009	LINC02130	-1.01405	-0.408978	-3.3829	0.00355493	0.141363	0.105753	10 x 37		16 p13	long intergenic non-protein coding RNA 2130 [Source:HGNC Symbol;Acc:HGNC:52989]
772	ENSG00000137563	GGH	0.993028	0.594477	3.23354	0.00355501	0.141363	0.105754	39 x 26	A	8 q12	gamma-glutamyl hydrolase [Source:HGNC Symbol;Acc:HGNC:4248]
773	ENSG00000277022		-0.988848	-0.401239	-3.40734	0.00355555	0.146759	0.105758	2 x 21		20 q13
774	ENSG00000153914	SREK1	-0.452023	-0.207031	-3.27117	0.00358548	0.146759	0.106005	4 x 19		5 q12	splicing regulatory glutamic acid and lysine rich protein 1 [Source:HGNC Symbol;Acc:HGNC:17882]
775	ENSG00000257337	LOC283335	-1.11996	-0.440147	-3.22065	0.00358696	0.146759	0.106017	8 x 31		12 q13
776	ENSG00000107281	NPDC1	-1.46009	-0.525486	-3.21606	0.00360115	0.146759	0.106133	14 x 40		9 q34	neural proliferation, differentiation and control 1 [Source:HGNC Symbol;Acc:HGNC:7899]
777	ENSG00000110090	CPT1A	-1.06344	-0.423785	-3.21277	0.00360692	0.146759	0.10618	26 x 14		11 q13	carnitine palmitoyltransferase 1A [Source:HGNC Symbol;Acc:HGNC:2328]
778	ENSG00000180185	FAHD1	-0.699764	-0.303627	-3.21485	0.00362735	0.146759	0.106346	19 x 40		16 p13	fumarylacetoacetate hydrolase domain containing 1 [Source:HGNC Symbol;Acc:HGNC:14169]
779	ENSG00000175183	CSRP2	1.32653	0.837186	3.24875	0.00362951	0.146759	0.106364	34 x 24	B	12 q21	cysteine and glycine rich protein 2 [Source:HGNC Symbol;Acc:HGNC:2470]
780	ENSG00000147454	SLC25A37	1.02726	0.618394	3.25213	0.00362993	0.146759	0.106367	17 x 23		8 p21	solute carrier family 25 member 37 [Source:HGNC Symbol;Acc:HGNC:29786]
781	ENSG00000119446	RBM18	-0.582835	-0.259524	-3.21123	0.00363577	0.146759	0.106414	1 x 13	I	9 q33	RNA binding motif protein 18 [Source:HGNC Symbol;Acc:HGNC:28413]
782	ENSG00000274376		0.519242	0.286901	3.23157	0.00363627	0.146759	0.106418	15 x 12		15 q25	ADAMTS7 pseudogene 1 [Source:HGNC Symbol;Acc:HGNC:49407]
783	ENSG00000204677		-0.802998	-0.340352	-3.22696	0.00363806	0.146759	0.106432	12 x 35		5 q35	family with sequence similarity 153 member C [Source:HGNC Symbol;Acc:HGNC:33936]
784	ENSG00000188542	DUSP28	-0.450758	-0.206507	-3.22843	0.00364627	0.146759	0.106498	7 x 33		2 q37	dual specificity phosphatase 28 [Source:HGNC Symbol;Acc:HGNC:33237]
785	ENSG00000244063		0.455887	0.249084	3.20673	0.00366252	0.146759	0.106628	18 x 27		2 q14
786	ENSG00000141560	FN3KRP	-0.770289	-0.328941	-3.20591	0.00366404	0.146759	0.10664	40 x 34	A	17 q25	fructosamine 3 kinase related protein [Source:HGNC Symbol;Acc:HGNC:25700]
787	ENSG00000100084	HIRA	0.731818	0.419499	3.27892	0.00366868	0.146759	0.106677	21 x 20		22 q11	histone cell cycle regulator [Source:HGNC Symbol;Acc:HGNC:4916]
788	ENSG00000184635	ZNF93	0.805271	0.467361	3.25844	0.0036955	0.146759	0.106889	30 x 21		19 p12	zinc finger protein 93 [Source:HGNC Symbol;Acc:HGNC:13169]
789	ENSG00000164296	TIGD6	-0.557288	-0.249534	-3.20566	0.0036994	0.146759	0.106919	15 x 38		5 q32	tigger transposable element derived 6 [Source:HGNC Symbol;Acc:HGNC:18332]
790	ENSG00000113838	TBCCD1	0.512339	0.282743	3.20693	0.00369945	0.146759	0.10692	29 x 18		3 q27	TBCC domain containing 1 [Source:HGNC Symbol;Acc:HGNC:25546]
791	ENSG00000062598	ELMO2	-0.625735	-0.276014	-3.20158	0.00370308	0.146759	0.106948	25 x 16		20 q13	engulfment and cell motility 2 [Source:HGNC Symbol;Acc:HGNC:17233]
792	ENSG00000172789	HOXC5	-0.738426	-0.317624	-3.22602	0.00370853	0.146759	0.106991	2 x 32		12 q13	homeobox C5 [Source:HGNC Symbol;Acc:HGNC:5127]
793	ENSG00000071677	PRLH	-0.600585	-0.266391	-3.29296	0.00371174	0.146759	0.107016	2 x 32		2 q37	prolactin releasing hormone [Source:HGNC Symbol;Acc:HGNC:17945]
794	ENSG00000065882	TBC1D1	0.75011	0.43132	3.21597	0.00371612	0.146759	0.10705	36 x 19		4 p14	TBC1 domain family member 1 [Source:HGNC Symbol;Acc:HGNC:11578]
795	ENSG00000105289	TJP3	-1.16413	-0.452503	-3.23109	0.00371975	0.146759	0.107079	11 x 40	K	19 p13	tight junction protein 3 [Source:HGNC Symbol;Acc:HGNC:11829]
796	ENSG00000254726	MEX3A	1.59478	1.04811	3.2011	0.00372023	0.146759	0.107082	32 x 25	B	1 q22	mex-3 RNA binding family member A [Source:HGNC Symbol;Acc:HGNC:33482]
797	ENSG00000178796	RIIAD1	-1.48236	-0.530289	-3.23213	0.00372558	0.146759	0.107124	6 x 40	K	1 q21	regulatory subunit of type II PKA R-subunit (RIIa) domain containing 1 [Source:HGNC Symbol;Acc:HGNC:26686]
798	ENSG00000232325		1.0043	0.602324	3.56842	0.00372784	0.146759	0.107141	37 x 15		7 p22
799	ENSG00000077235	GTF3C1	-0.597602	-0.265241	-3.20843	0.00373635	0.146759	0.107207	24 x 16		16 p12	general transcription factor IIIC subunit 1 [Source:HGNC Symbol;Acc:HGNC:4664]
800	ENSG00000089050	RBBP9	0.588533	0.329157	3.27969	0.00374229	0.146759	0.107253	28 x 19		20 p11	RB binding protein 9, serine hydrolase [Source:HGNC Symbol;Acc:HGNC:9892]
801	ENSG00000104044	OCA2	2.05508	1.4427	3.44627	0.00374506	0.146759	0.107275	23 x 24		15 q13	OCA2 melanosomal transmembrane protein [Source:HGNC Symbol;Acc:HGNC:8101]
802	ENSG00000169689	CENPX	-1.1084	-0.436852	-3.19659	0.00374794	0.146759	0.107297	38 x 38		17 q25	centromere protein X [Source:HGNC Symbol;Acc:HGNC:11422]
803	ENSG00000165694	FRMD7	-0.838585	-0.352531	-3.19804	0.00375475	0.146759	0.107349	19 x 8		X q26	FERM domain containing 7 [Source:HGNC Symbol;Acc:HGNC:8079]
804	ENSG00000148154	UGCG	-1.42267	-0.5172	-3.22347	0.00375775	0.146759	0.107372	11 x 38		9 q31	UDP-glucose ceramide glucosyltransferase [Source:HGNC Symbol;Acc:HGNC:12524]
805	ENSG00000143199	ADCY10	-0.710895	-0.307687	-3.19363	0.00377583	0.146759	0.10751	12 x 33		1 q24	adenylate cyclase 10, soluble [Source:HGNC Symbol;Acc:HGNC:21285]
806	ENSG00000169696	ASPSCR1	-0.760923	-0.325634	-3.19366	0.00378676	0.146759	0.107593	33 x 33		17 q25	ASPSCR1, UBX domain containing tether for SLC2A4 [Source:HGNC Symbol;Acc:HGNC:13825]
807	ENSG00000074211	PPP2R2C	-3.36776	-0.58678	-3.25996	0.00379046	0.146759	0.107621	1 x 36		4 p16	protein phosphatase 2 regulatory subunit Bgamma [Source:HGNC Symbol;Acc:HGNC:9306]
808	ENSG00000092820	EZR	-1.032	-0.414413	-3.19298	0.0037913	0.146759	0.107628	29 x 13		6 q25	ezrin [Source:HGNC Symbol;Acc:HGNC:12691]
809	ENSG00000270624		-0.743311	-0.319371	-3.20112	0.00379168	0.146759	0.107631	8 x 36		19 q13
810	ENSG00000187634	SAMD11	-2.00764	-0.615561	-3.31829	0.00379194	0.146759	0.107633	28 x 29		1 p36	sterile alpha motif domain containing 11 [Source:HGNC Symbol;Acc:HGNC:28706]
811	ENSG00000198729	PPP1R14C	2.5497	1.91267	3.26631	0.00380494	0.146759	0.107731	40 x 19	C	6 q25	protein phosphatase 1 regulatory inhibitor subunit 14C [Source:HGNC Symbol;Acc:HGNC:14952]
812	ENSG00000222044		0.854264	0.499869	3.1993	0.00380811	0.146759	0.107755	18 x 24		22 q13
813	ENSG00000213917		0.329061	0.175728	3.23248	0.00381086	0.165042	0.107775	25 x 39		2 q34	ribosomal protein L5 pseudogene 8 [Source:HGNC Symbol;Acc:HGNC:36290]
814	ENSG00000161980	POLR3K	-0.786266	-0.33454	-3.27436	0.00382299	0.165042	0.107894	38 x 37		16 p13	RNA polymerase III subunit K [Source:HGNC Symbol;Acc:HGNC:14121]
815	ENSG00000256916		2.23475	1.60791	3.40534	0.00382761	0.165042	0.107939	40 x 12	D	11 q22
816	ENSG00000273062		-0.934296	-0.384064	-3.21379	0.00385149	0.165042	0.108171	8 x 37		1 q25
817	ENSG00000124664	SPDEF	-2.85361	-0.639993	-3.3969	0.00385291	0.165042	0.108185	9 x 40	K	6 p21	SAM pointed domain containing ETS transcription factor [Source:HGNC Symbol;Acc:HGNC:17257]
818	ENSG00000125967	NECAB3	-1.20993	-0.464913	-3.21647	0.00386464	0.165042	0.108298	7 x 33		20 q11	N-terminal EF-hand calcium binding protein 3 [Source:HGNC Symbol;Acc:HGNC:15851]
819	ENSG00000232044		1.45521	0.936625	3.49003	0.00387304	0.165042	0.108379	30 x 24	B	2 p25	long intergenic non-protein coding RNA 1105 [Source:HGNC Symbol;Acc:HGNC:26403]
820	ENSG00000158373	HIST1H2BD	-1.72289	-0.576001	-3.21532	0.00388565	0.165042	0.1085	16 x 40		6 p22	histone cluster 1 H2B family member d [Source:HGNC Symbol;Acc:HGNC:4747]
821	ENSG00000211593		0.562714	0.313303	3.19408	0.00388661	0.165042	0.108509	35 x 6		2 p11	immunoglobulin kappa joining 5 [Source:HGNC Symbol;Acc:HGNC:5723]
822	ENSG00000117519	CNN3	0.838766	0.489535	3.20452	0.00388923	0.165042	0.108534	26 x 6		1 p21	calponin 3 [Source:HGNC Symbol;Acc:HGNC:2157]
823	ENSG00000154655	L3MBTL4	1.70457	1.13849	3.20973	0.0038901	0.165042	0.108542	36 x 21	C	18 p11	L3MBTL4, histone methyl-lysine binding protein [Source:HGNC Symbol;Acc:HGNC:26677]
824	ENSG00000134265	NAPG	-0.456035	-0.208691	-3.2134	0.00390558	0.165042	0.10869	29 x 13		18 p11	NSF attachment protein gamma [Source:HGNC Symbol;Acc:HGNC:7642]
825	ENSG00000214894	LINC00243	-1.70745	-0.573405	-3.27017	0.00390917	0.165042	0.108724	14 x 35		6 p21	long intergenic non-protein coding RNA 243 [Source:HGNC Symbol;Acc:HGNC:30956]
826	ENSG00000108799	EZH1	-0.606386	-0.268621	-3.17965	0.00391434	0.165042	0.108773	3 x 24		17 q21	enhancer of zeste 1 polycomb repressive complex 2 subunit [Source:HGNC Symbol;Acc:HGNC:3526]
827	ENSG00000260793		-1.07509	-0.42721	-3.20172	0.00391806	0.165042	0.108808	8 x 30		17 q21
828	ENSG00000228566		0.626141	0.352482	3.49246	0.00393638	0.165042	0.108981	23 x 33		10 q21
829	ENSG00000091640	SPAG7	-0.441638	-0.202721	-3.2528	0.00393842	0.165042	0.109	33 x 35		17 p13	sperm associated antigen 7 [Source:HGNC Symbol;Acc:HGNC:11216]
830	ENSG00000259447		-0.619862	-0.273778	-3.40939	0.00396149	0.165042	0.109216	9 x 34		15 q14
831	ENSG00000091127	PUS7	0.849261	0.496528	3.19067	0.00396625	0.165042	0.10926	29 x 19		7 q22	pseudouridylate synthase 7 (putative) [Source:HGNC Symbol;Acc:HGNC:26033]
832	ENSG00000166821	PEX11A	-1.23259	-0.470901	-3.18771	0.00397636	0.165042	0.109354	8 x 38	K	15 q26	peroxisomal biogenesis factor 11 alpha [Source:HGNC Symbol;Acc:HGNC:8852]
833	ENSG00000183943	PRKX	1.43137	0.917958	3.17828	0.00397949	0.165042	0.109384	40 x 15	C	X p22	protein kinase, X-linked [Source:HGNC Symbol;Acc:HGNC:9441]
834	ENSG00000279069		-0.729397	-0.314381	-3.1833	0.00398143	0.165042	0.109401	26 x 16		17 q22
835	ENSG00000156510	HKDC1	0.587508	0.328525	3.20929	0.00398207	0.165042	0.109407	21 x 23		10 q22	hexokinase domain containing 1 [Source:HGNC Symbol;Acc:HGNC:23302]
836	ENSG00000170412	GPRC5C	-2.01438	-0.616306	-3.21145	0.00398252	0.165042	0.109412	12 x 40	K	17 q25	G protein-coupled receptor class C group 5 member C [Source:HGNC Symbol;Acc:HGNC:13309]
837	ENSG00000229262		-0.392776	-0.18216	-3.37662	0.00398858	0.165042	0.109468	17 x 36		20 p11
838	ENSG00000187837	HIST1H1C	-2.03452	-0.61848	-3.26385	0.00399575	0.165042	0.109534	40 x 38		6 p22	histone cluster 1 H1 family member c [Source:HGNC Symbol;Acc:HGNC:4716]
839	ENSG00000248840		-0.635155	-0.279587	-3.1815	0.00399749	0.174563	0.10955	8 x 18		4 p16
840	ENSG00000101363	MANBAL	-0.512288	-0.231629	-3.17489	0.0040263	0.174563	0.109843	21 x 40		20 q11	mannosidase beta like [Source:HGNC Symbol;Acc:HGNC:15799]
841	ENSG00000130558	OLFM1	-1.59796	-0.553663	-3.23116	0.00403346	0.174563	0.109915	1 x 2	H	9 q34	olfactomedin 1 [Source:HGNC Symbol;Acc:HGNC:17187]
842	ENSG00000235049	LINC00940	-1.28802	-0.485127	-3.1801	0.00404807	0.174563	0.110062	4 x 37		12 p13	long intergenic non-protein coding RNA 940 [Source:HGNC Symbol;Acc:HGNC:48634]
843	ENSG00000039319	ZFYVE16	-0.462981	-0.211556	-3.16724	0.00404899	0.174563	0.110071	1 x 16	I	5 q14	zinc finger FYVE-type containing 16 [Source:HGNC Symbol;Acc:HGNC:20756]
844	ENSG00000142192	APP	0.728059	0.417078	3.16691	0.00405012	0.174563	0.110083	9 x 6		21 q21	amyloid beta precursor protein [Source:HGNC Symbol;Acc:HGNC:620]
845	ENSG00000228293		-0.73951	-0.318012	-3.29238	0.0040604	0.174563	0.110186	15 x 16		20 p13
846	ENSG00000250742	LINC02381	-1.21258	-0.465617	-3.16441	0.00406394	0.174563	0.110221	4 x 36		12 q13	long intergenic non-protein coding RNA 2381 [Source:HGNC Symbol;Acc:HGNC:53304]
847	ENSG00000139719	VPS33A	-0.473139	-0.21573	-3.17624	0.0040768	0.174563	0.110349	24 x 33		12 q24	VPS33A, CORVET/HOPS core subunit [Source:HGNC Symbol;Acc:HGNC:18179]
848	ENSG00000204054		-0.716755	-0.309814	-3.18962	0.00409637	0.174563	0.110544	13 x 36		9 q34	long intergenic non-protein coding RNA 963 [Source:HGNC Symbol;Acc:HGNC:48716]
849	ENSG00000158457	TSPAN33	1.19541	0.739176	3.1684	0.00409933	0.174563	0.110573	40 x 21	C	7 q32	tetraspanin 33 [Source:HGNC Symbol;Acc:HGNC:28743]
850	ENSG00000108950	FAM20A	1.22569	0.761516	3.1681	0.00411036	0.174563	0.110682	29 x 1		17 q24	FAM20A, golgi associated secretory pathway pseudokinase [Source:HGNC Symbol;Acc:HGNC:23015]
851	ENSG00000276223		-1.59704	-0.553489	-3.22734	0.00413453	0.174563	0.110919	14 x 40		20 q13
852	ENSG00000204666	LOC400710	-0.782236	-0.333133	-3.16273	0.0041403	0.174563	0.110975	13 x 33		19 q13
853	ENSG00000163638	ADAMTS9	0.74312	0.426795	3.22987	0.00416599	0.174563	0.111225	12 x 1		3 p14	ADAM metallopeptidase with thrombospondin type 1 motif 9 [Source:HGNC Symbol;Acc:HGNC:13202]
854	ENSG00000126581	BECN1	-0.720608	-0.311209	-3.15337	0.00416988	0.174563	0.111263	1 x 8	H	17 q21	beclin 1 [Source:HGNC Symbol;Acc:HGNC:1034]
855	ENSG00000131183	SLC34A1	-0.470184	-0.214518	-3.1789	0.00417503	0.174563	0.111313	21 x 33		5 q35	solute carrier family 34 member 1 [Source:HGNC Symbol;Acc:HGNC:11019]
856	ENSG00000244513		0.48444	0.266031	3.16115	0.00417873	0.174563	0.111348	12 x 24		3 p14
857	ENSG00000206014		0.600536	0.336571	3.39606	0.00420098	0.174563	0.111562	20 x 31		8 p23	olfactory receptor family 7 subfamily E member 161 pseudogene [Source:HGNC Symbol;Acc:HGNC:31234]
858	ENSG00000145439	CBR4	-0.68153	-0.296925	-3.17045	0.00420992	0.174563	0.111648	8 x 34		4 q32	carbonyl reductase 4 [Source:HGNC Symbol;Acc:HGNC:25891]
859	ENSG00000179051	RCC2	0.472889	0.259156	3.20341	0.00421365	0.174563	0.111684	25 x 20		1 p36	regulator of chromosome condensation 2 [Source:HGNC Symbol;Acc:HGNC:30297]
860	ENSG00000116885	OSCP1	-0.93056	-0.382866	-3.16137	0.00422092	0.174563	0.111753	3 x 40		1 p34	organic solute carrier partner 1 [Source:HGNC Symbol;Acc:HGNC:29971]
861	ENSG00000277157	HIST1H4D	-0.742284	-0.319004	-3.14761	0.00422375	0.174563	0.11178	40 x 32	A	6 p22	histone cluster 1 H4 family member d [Source:HGNC Symbol;Acc:HGNC:4782]
862	ENSG00000218357	LINC01644	-1.03227	-0.414494	-3.24472	0.00423255	0.174563	0.111864	8 x 37		22 q13	long intergenic non-protein coding RNA 1644 [Source:HGNC Symbol;Acc:HGNC:52431]
863	ENSG00000181444	ZNF467	-1.45756	-0.524934	-3.14673	0.00424222	0.174563	0.111955	15 x 40		7 q36	zinc finger protein 467 [Source:HGNC Symbol;Acc:HGNC:23154]
864	ENSG00000278022		-0.923993	-0.380755	-3.17876	0.0042463	0.174563	0.111994	10 x 32		15 q26
865	ENSG00000132780	NASP	0.795713	0.461074	3.19756	0.00424696	0.174563	0.112	37 x 25	C	1 p34	nuclear autoantigenic sperm protein [Source:HGNC Symbol;Acc:HGNC:7644]
866	ENSG00000097096	SYDE2	-1.39795	-0.511576	-3.15632	0.0042544	0.174563	0.11207	2 x 14	I	1 p22	synapse defective Rho GTPase homolog 2 [Source:HGNC Symbol;Acc:HGNC:25841]
867	ENSG00000152939	MARVELD2	-0.764874	-0.327031	-3.16919	0.00425738	0.174563	0.112098	1 x 16	I	5 q13	MARVEL domain containing 2 [Source:HGNC Symbol;Acc:HGNC:26401]
868	ENSG00000105875	WDR91	0.607283	0.340751	3.1624	0.00429119	0.174563	0.112415	19 x 22		7 q33	WD repeat domain 91 [Source:HGNC Symbol;Acc:HGNC:24997]
869	ENSG00000132912	DCTN4	-0.608313	-0.269361	-3.14475	0.00432311	0.174563	0.112712	1 x 15	I	5 q33	dynactin subunit 4 [Source:HGNC Symbol;Acc:HGNC:15518]
870	ENSG00000234213		0.511839	0.282442	3.26383	0.00433025	0.174563	0.112777	25 x 36		13 q14	fumarate hydratase pseudogene 1 [Source:HGNC Symbol;Acc:HGNC:39442]
871	ENSG00000171302	CANT1	-1.19098	-0.459827	-3.14328	0.00433417	0.174563	0.112814	25 x 14		17 q25	calcium activated nucleotidase 1 [Source:HGNC Symbol;Acc:HGNC:19721]
872	ENSG00000273056		0.635686	0.358446	3.25493	0.00434305	0.174563	0.112895	17 x 25		9 p24
873	ENSG00000105048	TNNT1	-2.60075	-0.647286	-3.16579	0.00435357	0.174563	0.112992	15 x 40		19 q13	troponin T1, slow skeletal type [Source:HGNC Symbol;Acc:HGNC:11948]
874	ENSG00000074696	HACD3	-1.02248	-0.411537	-3.18362	0.00435885	0.174563	0.11304	1 x 14	I	15 q22	3-hydroxyacyl-CoA dehydratase 3 [Source:HGNC Symbol;Acc:HGNC:24175]
875	ENSG00000253217		1.21591	0.754278	3.14498	0.00436488	0.174563	0.113095	40 x 16	C	8 q22
876	ENSG00000187486	KCNJ11	-1.81299	-0.590226	-3.14245	0.00436532	0.174563	0.113099	2 x 35		11 p15	potassium voltage-gated channel subfamily J member 11 [Source:HGNC Symbol;Acc:HGNC:6257]
877	ENSG00000164142	FAM160A1	0.807249	0.468664	3.15088	0.00437564	0.174563	0.113193	3 x 9	I	4 q31	family with sequence similarity 160 member A1 [Source:HGNC Symbol;Acc:HGNC:34237]
878	ENSG00000135127	BICDL1	-0.935389	-0.384414	-3.1398	0.00437673	0.174563	0.113203	12 x 38		12 q24	BICD family like cargo adaptor 1 [Source:HGNC Symbol;Acc:HGNC:28095]
879	ENSG00000186280	KDM4D	0.823268	0.479248	3.14618	0.00437691	0.174563	0.113205	25 x 23		11 q21	lysine demethylase 4D [Source:HGNC Symbol;Acc:HGNC:25498]
880	ENSG00000198353	HOXC4	-1.06224	-0.423432	-3.1386	0.00437709	0.174563	0.113206	1 x 31		12 q13	homeobox C4 [Source:HGNC Symbol;Acc:HGNC:5126]
881	ENSG00000155957	TMBIM4	-0.762471	-0.326182	-3.20087	0.004379	0.174563	0.113224	19 x 40		12 q14	transmembrane BAX inhibitor motif containing 4 [Source:HGNC Symbol;Acc:HGNC:24257]
882	ENSG00000264364	DYNLL2	-0.60297	-0.267309	-3.15167	0.00438103	0.174563	0.113242	26 x 15		17 q22	dynein light chain LC8-type 2 [Source:HGNC Symbol;Acc:HGNC:24596]
883	ENSG00000274346		-0.275553	-0.130939	-3.28753	0.00438561	0.174563	0.113284	12 x 15		2 q37
884	ENSG00000136918	WDR38	-0.475738	-0.216795	-3.15161	0.00438797	0.174563	0.113305	1 x 40		9 q33	WD repeat domain 38 [Source:HGNC Symbol;Acc:HGNC:23745]
885	ENSG00000165186	PTCHD1	2.31043	1.67938	3.13272	0.00438939	0.174563	0.113318	33 x 24	B	X p22	patched domain containing 1 [Source:HGNC Symbol;Acc:HGNC:26392]
886	ENSG00000033627	ATP6V0A1	-0.57764	-0.257503	-3.23462	0.00439013	0.174563	0.113325	24 x 16		17 q21	ATPase H+ transporting V0 subunit a1 [Source:HGNC Symbol;Acc:HGNC:865]
887	ENSG00000100092	SH3BP1	0.852813	0.498899	3.1621	0.0043968	0.174563	0.113385	35 x 8		22 q13	SH3 domain binding protein 1 [Source:HGNC Symbol;Acc:HGNC:10824]
888	ENSG00000131094	C1QL1	-1.51713	-0.537591	-3.1314	0.00440032	0.174563	0.113417	30 x 27		17 q21	complement C1q like 1 [Source:HGNC Symbol;Acc:HGNC:24182]
889	ENSG00000105926	MPP6	1.45247	0.934472	3.15544	0.00441478	0.174563	0.113547	33 x 22	B	7 p15	membrane palmitoylated protein 6 [Source:HGNC Symbol;Acc:HGNC:18167]
890	ENSG00000109861	CTSC	1.19961	0.742267	3.26769	0.00443059	0.174563	0.113689	37 x 7		11 q14	cathepsin C [Source:HGNC Symbol;Acc:HGNC:2528]
891	ENSG00000227230		0.415192	0.225205	3.1645	0.00444756	0.174563	0.11384	10 x 17		1 q43
892	ENSG00000188011	RTP5	0.520317	0.28755	3.15172	0.00444842	0.174563	0.113848	34 x 7		2 q37	receptor transporter protein 5 (putative) [Source:HGNC Symbol;Acc:HGNC:26585]
893	ENSG00000159958	TNFRSF13C	1.29796	0.815546	3.26033	0.00444896	0.174563	0.113853	33 x 25	B	22 q13	TNF receptor superfamily member 13C [Source:HGNC Symbol;Acc:HGNC:17755]
894	ENSG00000244045	TMEM199	-0.721515	-0.311537	-3.14316	0.00445488	0.174563	0.113905	28 x 33		17 q11	transmembrane protein 199 [Source:HGNC Symbol;Acc:HGNC:18085]
895	ENSG00000235314		-1.07314	-0.426638	-3.1503	0.00447631	0.174563	0.114095	15 x 40		7 p13	long intergenic non-protein coding RNA 957 [Source:HGNC Symbol;Acc:HGNC:22332]
896	ENSG00000245748	LOC100129931	-0.77684	-0.331243	-3.17483	0.00448244	0.174563	0.114149	8 x 18		4 p16
897	ENSG00000182175	RGMA	1.60335	1.05509	3.12457	0.00449708	0.174563	0.114278	31 x 25	B	15 q26	repulsive guidance molecule family member a [Source:HGNC Symbol;Acc:HGNC:30308]
898	ENSG00000086548	CEACAM6	-3.27321	-0.600428	-3.12219	0.00451189	0.174563	0.114408	9 x 40	K	19 q13	carcinoembryonic antigen related cell adhesion molecule 6 [Source:HGNC Symbol;Acc:HGNC:1818]
899	ENSG00000257379		-0.445891	-0.204489	-3.15533	0.00452151	0.174563	0.114492	7 x 14		12 q13
900	ENSG00000265692	LINC01970	-0.520147	-0.234784	-3.11946	0.00452351	0.174563	0.114509	30 x 34		17 q25	long intergenic non-protein coding RNA 1970 [Source:HGNC Symbol;Acc:HGNC:52796]
901	ENSG00000217643		0.529691	0.293214	3.20383	0.0045281	0.174563	0.114549	23 x 27		2 p23	prostaglandin E synthase 3 pseudogene 2 [Source:HGNC Symbol;Acc:HGNC:43822]
902	ENSG00000153923	CLCA3P	0.340572	0.182257	3.21284	0.00453027	0.174563	0.114568	23 x 31		1 p22	chloride channel accessory 3, pseudogene [Source:HGNC Symbol;Acc:HGNC:2017]
903	ENSG00000241217		-0.400373	-0.185388	-3.11878	0.00453264	0.174563	0.114589	8 x 19		12 q13	RNA, 7SL, cytoplasmic 809, pseudogene [Source:HGNC Symbol;Acc:HGNC:46825]
904	ENSG00000256124	LINC01152	1.72476	1.15536	3.11713	0.00456038	0.174563	0.114828	23 x 25		17 q24	long intergenic non-protein coding RNA 1152 [Source:HGNC Symbol;Acc:HGNC:16752]
905	ENSG00000010626	LRRC23	-0.862651	-0.360628	-3.1174	0.00457435	0.174563	0.114949	2 x 31		12 p13	leucine rich repeat containing 23 [Source:HGNC Symbol;Acc:HGNC:19138]
906	ENSG00000108406	DHX40	-0.740379	-0.318323	-3.1165	0.00458463	0.174563	0.115037	1 x 16	I	17 q23	DEAH-box helicase 40 [Source:HGNC Symbol;Acc:HGNC:18018]
907	ENSG00000168301	KCTD6	-1.31268	-0.491266	-3.11224	0.00460457	0.174563	0.115207	7 x 37		3 p14	potassium channel tetramerization domain containing 6 [Source:HGNC Symbol;Acc:HGNC:22235]
908	ENSG00000100142	POLR2F	1.74711	1.17413	3.12912	0.00460734	0.174563	0.11523	19 x 24		22 q13	RNA polymerase II subunit F [Source:HGNC Symbol;Acc:HGNC:9193]
909	ENSG00000110148	CCKBR	2.74666	2.11307	3.50028	0.00461129	0.174563	0.115264	32 x 25	B	11 p15	cholecystokinin B receptor [Source:HGNC Symbol;Acc:HGNC:1571]
910	ENSG00000109101	FOXN1	-1.16267	-0.452099	-3.12193	0.00462532	0.174563	0.115383	4 x 33		17 q11	forkhead box N1 [Source:HGNC Symbol;Acc:HGNC:12765]
911	ENSG00000102678	FGF9	2.22843	1.60199	3.43082	0.0046254	0.174563	0.115383	28 x 25		13 q12	fibroblast growth factor 9 [Source:HGNC Symbol;Acc:HGNC:3687]
912	ENSG00000231439	WASIR2	-1.2594	-0.477857	-3.14652	0.00462769	0.174563	0.115403	3 x 35		16 p13	WASH and IL9R antisense RNA 2 [Source:HGNC Symbol;Acc:HGNC:38609]
913	ENSG00000205323	SARNP	-0.531191	-0.239198	-3.13051	0.00463173	0.174563	0.115437	22 x 40		12 q13	SAP domain containing ribonucleoprotein [Source:HGNC Symbol;Acc:HGNC:24432]
914	ENSG00000266010	GATA6-AS1	1.21999	0.7573	3.1473	0.0046472	0.174563	0.115567	20 x 24		18 q11	GATA6 antisense RNA 1 (head to head) [Source:HGNC Symbol;Acc:HGNC:48840]
915	ENSG00000269982		-0.496945	-0.225433	-3.14305	0.00465412	0.174563	0.115625	6 x 20		3 p25
916	ENSG00000152700	SAR1B	-0.642504	-0.282363	-3.11377	0.00466276	0.174563	0.115698	14 x 39		5 q31	secretion associated Ras related GTPase 1B [Source:HGNC Symbol;Acc:HGNC:10535]
917	ENSG00000249684		-1.39986	-0.512015	-3.11059	0.00466437	0.174563	0.115711	10 x 35		5 q35
918	ENSG00000149294	NCAM1	2.03531	1.42491	3.18873	0.00467738	0.174563	0.11582	10 x 3		11 q23	neural cell adhesion molecule 1 [Source:HGNC Symbol;Acc:HGNC:7656]
919	ENSG00000249992	TMEM158	1.77941	1.20143	3.10616	0.00467904	0.174563	0.115834	25 x 1	G	3 p21	transmembrane protein 158 (gene/pseudogene) [Source:HGNC Symbol;Acc:HGNC:30293]
920	ENSG00000036448	MYOM2	-0.90657	-0.375113	-3.10524	0.00468261	0.174563	0.115863	9 x 2		8 p23	myomesin 2 [Source:HGNC Symbol;Acc:HGNC:7614]
921	ENSG00000153551	CMTM7	1.22079	0.757889	3.10523	0.00468815	0.174563	0.115909	39 x 15		3 p22	CKLF like MARVEL transmembrane domain containing 7 [Source:HGNC Symbol;Acc:HGNC:19178]
922	ENSG00000261226		-0.613273	-0.271261	-3.21546	0.00468899	0.174563	0.115916	17 x 15		16 q24
923	ENSG00000135346	CGA	-3.19844	-0.609986	-3.3297	0.00469227	0.174563	0.115944	26 x 16		6 q14	glycoprotein hormones, alpha polypeptide [Source:HGNC Symbol;Acc:HGNC:1885]
924	ENSG00000116815	CD58	0.505097	0.278391	3.13034	0.00469989	0.174563	0.116007	29 x 7		1 p13	CD58 molecule [Source:HGNC Symbol;Acc:HGNC:1688]
925	ENSG00000280088		-0.558635	-0.250064	-3.10609	0.0047056	0.174563	0.116054	13 x 34		12 q23
926	ENSG00000237921		0.30761	0.16363	3.10417	0.00472203	0.174563	0.11619	13 x 13		7 p21
927	ENSG00000113163	COL4A3BP	-0.502099	-0.22752	-3.10105	0.00473105	0.174563	0.116264	1 x 15	I	5 q13	collagen type IV alpha 3 binding protein [Source:HGNC Symbol;Acc:HGNC:2205]
928	ENSG00000141639	MAPK4	2.35674	1.72366	3.17627	0.00473485	0.174563	0.116295	31 x 25	B	18 q21	mitogen-activated protein kinase 4 [Source:HGNC Symbol;Acc:HGNC:6878]
929	ENSG00000262921		0.347063	0.18595	3.09817	0.00476395	0.174563	0.116532	21 x 33		17 p13
930	ENSG00000274737		-0.402502	-0.18629	-3.15317	0.00477032	0.174563	0.116584	10 x 21		12 q13
931	ENSG00000108684	ASIC2	-1.38594	-0.508802	-3.13489	0.00477168	0.174563	0.116595	1 x 3	H	17 q12	acid sensing ion channel subunit 2 [Source:HGNC Symbol;Acc:HGNC:99]
932	ENSG00000228412	LOC100506885	0.979497	0.585087	3.16909	0.00477482	0.174563	0.116621	22 x 27		6 p22
933	ENSG00000143147	GPR161	1.1402	0.698915	3.21434	0.00478928	0.174563	0.116738	30 x 23	B	1 q24	G protein-coupled receptor 161 [Source:HGNC Symbol;Acc:HGNC:23694]
934	ENSG00000183779	ZNF703	-1.93144	-0.606521	-3.11385	0.00479999	0.174563	0.116824	1 x 35		8 p11	zinc finger protein 703 [Source:HGNC Symbol;Acc:HGNC:25883]
935	ENSG00000124159	MATN4	1.88641	1.29333	3.30173	0.00480036	0.174563	0.116827	32 x 25	B	20 q13	matrilin 4 [Source:HGNC Symbol;Acc:HGNC:6910]
936	ENSG00000089818	NECAP1	-0.649242	-0.284898	-3.09728	0.00480485	0.174563	0.116863	1 x 14	I	12 p13	NECAP endocytosis associated 1 [Source:HGNC Symbol;Acc:HGNC:24539]
937	ENSG00000119048	UBE2B	-0.412092	-0.190344	-3.09417	0.00481356	0.174563	0.116933	21 x 40		5 q31	ubiquitin conjugating enzyme E2 B [Source:HGNC Symbol;Acc:HGNC:12473]
938	ENSG00000262652		-0.422032	-0.194527	-3.24871	0.00481644	0.174563	0.116956	11 x 20		17 q25
939	ENSG00000153982	GDPD1	-0.999021	-0.404377	-3.09041	0.00485419	0.174563	0.117257	5 x 35		17 q22	glycerophosphodiester phosphodiesterase domain containing 1 [Source:HGNC Symbol;Acc:HGNC:20883]
940	ENSG00000129625	REEP5	-0.868309	-0.362515	-3.22083	0.00486391	0.174563	0.117334	14 x 40		5 q22	receptor accessory protein 5 [Source:HGNC Symbol;Acc:HGNC:30077]
941	ENSG00000197375	SLC22A5	-1.0258	-0.412544	-3.09338	0.00486425	0.174563	0.117337	9 x 37		5 q31	solute carrier family 22 member 5 [Source:HGNC Symbol;Acc:HGNC:10969]
942	ENSG00000106123	EPHB6	1.2553	0.78353	3.26554	0.00486748	0.174563	0.117362	21 x 24		7 q34	EPH receptor B6 [Source:HGNC Symbol;Acc:HGNC:3396]
943	ENSG00000197921	HES5	-0.493355	-0.223977	-3.11861	0.00486987	0.174563	0.117381	18 x 11		1 p36	hes family bHLH transcription factor 5 [Source:HGNC Symbol;Acc:HGNC:19764]
944	ENSG00000178927	C17orf62	-0.708014	-0.306638	-3.09353	0.00488414	0.174563	0.117494	19 x 14		17 q25	chromosome 17 open reading frame 62 [Source:HGNC Symbol;Acc:HGNC:28672]
945	ENSG00000143418	CERS2	-0.826081	-0.34828	-3.16203	0.00488721	0.174563	0.117518	1 x 14	I	1 q21	ceramide synthase 2 [Source:HGNC Symbol;Acc:HGNC:14076]
946	ENSG00000111981	ULBP1	1.73767	1.16619	3.1546	0.00488893	0.174563	0.117531	40 x 22	C	6 q25	UL16 binding protein 1 [Source:HGNC Symbol;Acc:HGNC:14893]
947	ENSG00000186197	EDARADD	-1.8848	-0.600431	-3.09785	0.00489577	0.174563	0.117585	4 x 1		1 q42	EDAR associated death domain [Source:HGNC Symbol;Acc:HGNC:14341]
948	ENSG00000164841	TMEM74	1.379	0.877343	3.08765	0.00490131	0.174563	0.117628	34 x 23	B	8 q23	transmembrane protein 74 [Source:HGNC Symbol;Acc:HGNC:26409]
949	ENSG00000103460	TOX3	-2.1915	-0.632719	-3.11982	0.00490148	0.174563	0.11763	1 x 36		16 q12	TOX high mobility group box family member 3 [Source:HGNC Symbol;Acc:HGNC:11972]
950	ENSG00000109819	PPARGC1A	2.04709	1.4355	3.27625	0.00490966	0.174563	0.117694	13 x 4		4 p15	PPARG coactivator 1 alpha [Source:HGNC Symbol;Acc:HGNC:9237]
951	ENSG00000134830	C5AR2	-1.71299	-0.574342	-3.13834	0.00491927	0.174563	0.117769	1 x 3	H	19 q13	complement component 5a receptor 2 [Source:HGNC Symbol;Acc:HGNC:4527]
952	ENSG00000169217	CD2BP2	-0.559641	-0.25046	-3.0862	0.00492211	0.174563	0.117791	17 x 39		16 p11	CD2 cytoplasmic tail binding protein 2 [Source:HGNC Symbol;Acc:HGNC:1656]
953	ENSG00000064225	ST3GAL6	1.18363	0.730535	3.10468	0.00492294	0.174563	0.117797	38 x 13		3 q12	ST3 beta-galactoside alpha-2,3-sialyltransferase 6 [Source:HGNC Symbol;Acc:HGNC:18080]
954	ENSG00000277258	PCGF2	-0.836829	-0.351936	-3.09605	0.00493204	0.174563	0.117868	5 x 34		17 q12	polycomb group ring finger 2 [Source:HGNC Symbol;Acc:HGNC:12929]
955	ENSG00000273258		0.46816	0.25635	3.16758	0.00495098	0.174563	0.118014	19 x 26		2 q31
956	ENSG00000138131	LOXL4	1.55337	1.01464	3.27619	0.00495486	0.174563	0.118044	40 x 14	D	10 q24	lysyl oxidase like 4 [Source:HGNC Symbol;Acc:HGNC:17171]
957	ENSG00000261471		0.404576	0.219029	3.16129	0.00496125	0.174563	0.118094	15 x 21		16 q24
958	ENSG00000111912	NCOA7	0.990139	0.592469	3.09497	0.00496194	0.174563	0.118099	40 x 10	D	6 q22	nuclear receptor coactivator 7 [Source:HGNC Symbol;Acc:HGNC:21081]
959	ENSG00000274259		0.49744	0.2738	3.10471	0.00496613	0.174563	0.118131	17 x 26		6 p21
960	ENSG00000124762	CDKN1A	-0.960248	-0.392307	-3.09229	0.00496991	0.174563	0.11816	23 x 8		6 p21	cyclin dependent kinase inhibitor 1A [Source:HGNC Symbol;Acc:HGNC:1784]
961	ENSG00000257743	MGAM2	2.36919	1.73564	3.20555	0.00499143	0.174563	0.118325	10 x 7		7 q34	maltase-glucoamylase 2 (putative) [Source:HGNC Symbol;Acc:HGNC:28101]
962	ENSG00000115556	PLCD4	-1.05201	-0.420399	-3.19815	0.00499496	0.174563	0.118352	2 x 24		2 q35	phospholipase C delta 4 [Source:HGNC Symbol;Acc:HGNC:9062]
963	ENSG00000164659	KIAA1324L	-1.44745	-0.522718	-3.1506	0.0050008	0.174563	0.118397	1 x 1		7 q21	KIAA1324 like [Source:HGNC Symbol;Acc:HGNC:21945]
964	ENSG00000224014		0.493788	0.271614	3.07737	0.00503968	0.174563	0.118691	19 x 28		1 q44
965	ENSG00000165195	PIGA	0.797769	0.462424	3.10622	0.00504388	0.174563	0.118723	32 x 15		X p22	phosphatidylinositol glycan anchor biosynthesis class A [Source:HGNC Symbol;Acc:HGNC:8957]
966	ENSG00000061987	MON2	-0.531674	-0.239391	-3.09265	0.00507369	0.174563	0.118946	4 x 14		12 q14	MON2 homolog, regulator of endosome-to-Golgi trafficking [Source:HGNC Symbol;Acc:HGNC:29177]
967	ENSG00000172243	CLEC7A	1.43466	0.920525	3.09149	0.00508473	0.174563	0.119029	35 x 1	F	12 p13	C-type lectin domain containing 7A [Source:HGNC Symbol;Acc:HGNC:14558]
968	ENSG00000281655		1.82309	1.23867	3.40766	0.00508829	0.174563	0.119055	40 x 12	D	11 q22
969	ENSG00000148396	SEC16A	-0.800599	-0.339522	-3.08461	0.00508898	0.174563	0.11906	1 x 7	H	9 q34	SEC16 homolog A, endoplasmic reticulum export factor [Source:HGNC Symbol;Acc:HGNC:29006]
970	ENSG00000240859		1.22179	0.758625	3.08202	0.00513202	0.174563	0.119379	39 x 11	D	7 p22
971	ENSG00000267649		-0.692077	-0.300809	-3.07941	0.00513588	0.174563	0.119407	17 x 19		19 q13
972	ENSG00000184697	CLDN6	2.63567	1.99921	3.22686	0.00514597	0.174563	0.119481	32 x 25	B	16 p13	claudin 6 [Source:HGNC Symbol;Acc:HGNC:2048]
973	ENSG00000001617	SEMA3F	-0.993754	-0.402755	-3.06661	0.00514724	0.174563	0.11949	9 x 37		3 p21	semaphorin 3F [Source:HGNC Symbol;Acc:HGNC:10728]
974	ENSG00000083857	FAT1	1.1533	0.708417	3.06527	0.00516151	0.174563	0.119595	26 x 3	G	4 q35	FAT atypical cadherin 1 [Source:HGNC Symbol;Acc:HGNC:3595]
975	ENSG00000244327		0.378801	0.204125	3.16832	0.00516562	0.174563	0.119625	11 x 21		3 q23
976	ENSG00000118564	FBXL5	-0.653133	-0.286358	-3.08524	0.00518144	0.174563	0.11974	17 x 38		4 p15	F-box and leucine rich repeat protein 5 [Source:HGNC Symbol;Acc:HGNC:13602]
977	ENSG00000237128	LOC105376468	0.473398	0.259459	3.12289	0.00518671	0.174563	0.119778	22 x 22		10 p12
978	ENSG00000227220		0.517066	0.28559	3.06325	0.00519	0.174563	0.119802	17 x 7		6 q23
979	ENSG00000239614		0.452439	0.247049	3.08131	0.00519789	0.174563	0.119859	10 x 10		3 q11	high mobility group nucleosome binding domain 1 pseudogene 7 [Source:HGNC Symbol;Acc:HGNC:39350]
980	ENSG00000124198	ARFGEF2	-0.822888	-0.34719	-3.06398	0.00520006	0.174563	0.119875	1 x 9	I	20 q13	ADP ribosylation factor guanine nucleotide exchange factor 2 [Source:HGNC Symbol;Acc:HGNC:15853]
981	ENSG00000180957	PITPNB	0.490476	0.269634	3.13107	0.00521396	0.174563	0.119975	31 x 12		22 q12	phosphatidylinositol transfer protein beta [Source:HGNC Symbol;Acc:HGNC:9002]
982	ENSG00000079691	CARMIL1	0.7272	0.416525	3.09003	0.00522647	0.174563	0.120065	6 x 11		6 p22	capping protein regulator and myosin 1 linker 1 [Source:HGNC Symbol;Acc:HGNC:21581]
983	ENSG00000217862		-0.658742	-0.288457	-3.06036	0.00523606	0.174563	0.120133	26 x 14		6 p22
984	ENSG00000187045	TMPRSS6	-1.99861	-0.614549	-3.16416	0.00524761	0.174563	0.120216	1 x 36		22 q12	transmembrane protease, serine 6 [Source:HGNC Symbol;Acc:HGNC:16517]
985	ENSG00000138386	NAB1	0.668316	0.378968	3.07969	0.00525257	0.174563	0.120251	34 x 16		2 q32	NGFI-A binding protein 1 [Source:HGNC Symbol;Acc:HGNC:7626]
986	ENSG00000151778	SERP2	-1.01503	-0.409276	-3.05947	0.00525331	0.174563	0.120256	4 x 34		13 q14	stress associated endoplasmic reticulum protein family member 2 [Source:HGNC Symbol;Acc:HGNC:20607]
987	ENSG00000125845	BMP2	1.08706	0.66072	3.07856	0.00525733	0.174563	0.120285	14 x 4		20 p12	bone morphogenetic protein 2 [Source:HGNC Symbol;Acc:HGNC:1069]
988	ENSG00000049283	EPN3	-1.26251	-0.478654	-3.06139	0.00526542	0.174563	0.120343	13 x 40		17 q21	epsin 3 [Source:HGNC Symbol;Acc:HGNC:18235]
989	ENSG00000232713		-0.489634	-0.222465	-3.05846	0.00527101	0.174563	0.120382	12 x 34		2 p16
990	ENSG00000112149	CD83	1.00752	0.604574	3.07155	0.00527194	0.174563	0.120389	33 x 5		6 p23	CD83 molecule [Source:HGNC Symbol;Acc:HGNC:1703]
991	ENSG00000075618	FSCN1	1.1115	0.678217	3.05591	0.00527956	0.174563	0.120443	31 x 25	B	7 p22	fascin actin-bundling protein 1 [Source:HGNC Symbol;Acc:HGNC:11148]
992	ENSG00000183317	EPHA10	-1.54358	-0.542991	-3.07627	0.0052796	0.174563	0.120443	13 x 40		1 p34	EPH receptor A10 [Source:HGNC Symbol;Acc:HGNC:19987]
993	ENSG00000229419		-0.715066	-0.309201	-3.05602	0.00528549	0.174563	0.120485	5 x 14		9 q31	Ral GTPase activating protein catalytic alpha subunit 1 pseudogene 1 [Source:HGNC Symbol;Acc:HGNC:23203]
994	ENSG00000125458	NT5C	-0.649189	-0.284878	-3.05604	0.00529719	0.174563	0.120567	40 x 40		17 q25	5', 3'-nucleotidase, cytosolic [Source:HGNC Symbol;Acc:HGNC:17144]
995	ENSG00000068097	HEATR6	-0.896137	-0.371706	-3.10954	0.00529729	0.174563	0.120568	1 x 11	I	17 q23	HEAT repeat containing 6 [Source:HGNC Symbol;Acc:HGNC:24076]
996	ENSG00000144868	TMEM108	1.39214	0.887479	3.05734	0.00530194	0.174563	0.120601	30 x 25	B	3 q22	transmembrane protein 108 [Source:HGNC Symbol;Acc:HGNC:28451]
997	ENSG00000197168	NEK5	-1.20211	-0.462821	-3.08003	0.00534503	0.174563	0.120902	3 x 40		13 q14	NIMA related kinase 5 [Source:HGNC Symbol;Acc:HGNC:7748]
998	ENSG00000141349	G6PC3	-0.921698	-0.380015	-3.06728	0.00534789	0.174563	0.120922	18 x 40		17 q21	glucose-6-phosphatase catalytic subunit 3 [Source:HGNC Symbol;Acc:HGNC:24861]
999	ENSG00000185198	PRSS57	-0.382364	-0.177719	-3.12365	0.0053618	0.174563	0.121018	17 x 13		19 p13	protease, serine 57 [Source:HGNC Symbol;Acc:HGNC:31397]
1000	ENSG00000182551	ADI1	0.753487	0.433509	3.08983	0.00536641	0.174563	0.12105	35 x 32		2 p25	acireductone dioxygenase 1 [Source:HGNC Symbol;Acc:HGNC:30576]
1001	ENSG00000253366		-0.513079	-0.231947	-3.16506	0.00537201	0.174563	0.121089	15 x 34		5 q13
1002	ENSG00000181552	EDDM3B	-1.52997	-0.540231	-3.19268	0.00537266	0.174563	0.121093	9 x 35		14 q11	epididymal protein 3B [Source:HGNC Symbol;Acc:HGNC:19223]
1003	ENSG00000104731	KLHDC4	0.861173	0.504491	3.04787	0.00538065	0.174563	0.121148	20 x 20		16 q24	kelch domain containing 4 [Source:HGNC Symbol;Acc:HGNC:25272]
1004	ENSG00000205864	KRTAP5-6	-0.435455	-0.200145	-3.09855	0.00538276	0.174563	0.121163	21 x 34		11 p15	keratin associated protein 5-6 [Source:HGNC Symbol;Acc:HGNC:23600]
1005	ENSG00000197496	SLC2A10	-1.37647	-0.506593	-3.10068	0.00538364	0.174563	0.121169	3 x 2	H	20 q13	solute carrier family 2 member 10 [Source:HGNC Symbol;Acc:HGNC:13444]
1006	ENSG00000171243	SOSTDC1	2.41574	1.78068	3.08492	0.00538493	0.174563	0.121178	11 x 3		7 p21	sclerostin domain containing 1 [Source:HGNC Symbol;Acc:HGNC:21748]
1007	ENSG00000232082	RPS6KA2-IT1	0.573577	0.319957	3.07837	0.00539153	0.174563	0.121223	11 x 11		6 q27	RPS6KA2 intronic transcript 1 [Source:HGNC Symbol;Acc:HGNC:41378]
1008	ENSG00000249947		-0.333761	-0.156708	-3.0517	0.00540349	0.174563	0.121305	7 x 20		5 q22	X-box binding protein 1 pseudogene 1 [Source:HGNC Symbol;Acc:HGNC:12802]
1009	ENSG00000105711	SCN1B	-1.17665	-0.455935	-3.06913	0.00540722	0.174563	0.121331	14 x 38		19 q13	sodium voltage-gated channel beta subunit 1 [Source:HGNC Symbol;Acc:HGNC:10586]
1010	ENSG00000173567	ADGRF3	0.784186	0.453514	3.07469	0.00541083	0.174563	0.121356	19 x 23		2 p23	adhesion G protein-coupled receptor F3 [Source:HGNC Symbol;Acc:HGNC:18989]
1011	ENSG00000099622	CIRBP	-0.685374	-0.298343	-3.11101	0.00542046	0.174563	0.121421	7 x 32		19 p13	cold inducible RNA binding protein [Source:HGNC Symbol;Acc:HGNC:1982]
1012	ENSG00000239779	WBP1	-0.635462	-0.279703	-3.0589	0.00542623	0.174563	0.121461	5 x 31		2 p13	WW domain binding protein 1 [Source:HGNC Symbol;Acc:HGNC:12737]
1013	ENSG00000175482	POLD4	-0.918435	-0.378962	-3.05202	0.0054293	0.174563	0.121481	15 x 40		11 q13	DNA polymerase delta 4, accessory subunit [Source:HGNC Symbol;Acc:HGNC:14106]
1014	ENSG00000272024		0.526899	0.291525	3.05055	0.0054309	0.174563	0.121492	18 x 26		8 q11
1015	ENSG00000108852	MPP2	-1.62667	-0.559065	-3.04793	0.00544295	0.174563	0.121574	1 x 35		17 q21	membrane palmitoylated protein 2 [Source:HGNC Symbol;Acc:HGNC:7220]
1016	ENSG00000233360	LOC101927051	0.408443	0.221276	3.04297	0.00544462	0.174563	0.121585	17 x 19		22 q13
1017	ENSG00000009765	IYD	-2.14073	-0.628638	-3.18315	0.00545082	0.174563	0.121627	10 x 38	K	6 q25	iodotyrosine deiodinase [Source:HGNC Symbol;Acc:HGNC:21071]
1018	ENSG00000134755	DSC2	1.49879	0.971028	3.04167	0.00546222	0.174563	0.121704	31 x 21		18 q12	desmocollin 2 [Source:HGNC Symbol;Acc:HGNC:3036]
1019	ENSG00000265185	SNORD3B-1	0.727706	0.41685	3.24292	0.00546653	0.174563	0.121734	28 x 35		17 p11	small nucleolar RNA, C/D box 3B-1 [Source:HGNC Symbol;Acc:HGNC:10168]
1020	ENSG00000184056	VPS33B	-0.645148	-0.283358	-3.04195	0.00546682	0.174563	0.121735	22 x 35		15 q26	VPS33B, late endosome and lysosome associated [Source:HGNC Symbol;Acc:HGNC:12712]
1021	ENSG00000082556	OPRK1	1.57775	1.03431	3.05	0.00548974	0.174563	0.121889	33 x 24	B	8 q11	opioid receptor kappa 1 [Source:HGNC Symbol;Acc:HGNC:8154]
1022	ENSG00000232977	LINC00327	0.983797	0.588067	3.16784	0.00550266	0.174563	0.121976	19 x 7		13 q12	long intergenic non-protein coding RNA 327 [Source:HGNC Symbol;Acc:HGNC:42009]
1023	ENSG00000254208		0.536585	0.29739	3.05031	0.00550499	0.174563	0.121991	28 x 33		8 q21
1024	ENSG00000230074		0.825463	0.480702	3.03957	0.00550643	0.174563	0.122001	11 x 9		9 p13
1025	ENSG00000110171	TRIM3	-0.993075	-0.402545	-3.0501	0.00552159	0.174563	0.122102	11 x 36		11 p15	tripartite motif containing 3 [Source:HGNC Symbol;Acc:HGNC:10064]
1026	ENSG00000262801		-1.34532	-0.499208	-3.05622	0.00552516	0.174563	0.122126	21 x 37		16 p13
1027	ENSG00000276934		0.495091	0.272394	3.03695	0.00552546	0.174563	0.122128	14 x 24		18 q22
1028	ENSG00000274600	RIMBP3B	-0.404165	-0.186994	-3.07265	0.0055642	0.174563	0.122384	17 x 14		22 q11	RIMS binding protein 3B [Source:HGNC Symbol;Acc:HGNC:33891]
1029	ENSG00000271155		0.535738	0.296876	3.03545	0.00557093	0.174563	0.122428	23 x 26		9 q22
1030	ENSG00000261229		-0.521383	-0.235279	-3.03373	0.00557343	0.174563	0.122444	9 x 35		15 q25
1031	ENSG00000166682	TMPRSS5	1.51706	0.985564	3.23665	0.00557958	0.174563	0.122485	20 x 24		11 q23	transmembrane protease, serine 5 [Source:HGNC Symbol;Acc:HGNC:14908]
1032	ENSG00000232352	SEMA3B-AS1	-1.04236	-0.417523	-3.1173	0.00558075	0.174563	0.122492	14 x 40		3 p21	SEMA3B antisense RNA 1 (head to head) [Source:HGNC Symbol;Acc:HGNC:49096]
1033	ENSG00000234785		0.386862	0.208772	3.04185	0.00560875	0.174563	0.122675	28 x 40		X q23	eukaryotic translation elongation factor 1 gamma pseudogene 5 [Source:HGNC Symbol;Acc:HGNC:44560]
1034	ENSG00000272370		-0.445498	-0.204326	-3.0361	0.00563061	0.174563	0.122817	14 x 33		5 q12
1035	ENSG00000162753	SLC9C2	0.603757	0.338566	3.13447	0.00563973	0.174563	0.122876	20 x 26		1 q25	solute carrier family 9 member C2 (putative) [Source:HGNC Symbol;Acc:HGNC:28664]
1036	ENSG00000196588	MKL1	0.444862	0.242583	3.04131	0.00564403	0.174563	0.122903	20 x 11		22 q13	megakaryoblastic leukemia (translocation) 1 [Source:HGNC Symbol;Acc:HGNC:14334]
1037	ENSG00000163875	MEAF6	-0.515857	-0.233063	-3.04025	0.00564999	0.174563	0.122942	20 x 39		1 p34	MYST/Esa1 associated factor 6 [Source:HGNC Symbol;Acc:HGNC:25674]
1038	ENSG00000272922		0.782628	0.452495	3.11448	0.00565554	0.174563	0.122977	18 x 26		3 q27
1039	ENSG00000229920		0.374451	0.201622	3.05699	0.00565831	0.174563	0.122995	18 x 27		2 p15	ribosomal protein S4X pseudogene 5 [Source:HGNC Symbol;Acc:HGNC:36670]
1040	ENSG00000160050	CCDC28B	0.693086	0.394684	3.04296	0.00566503	0.174563	0.123038	33 x 34		1 p35	coiled-coil domain containing 28B [Source:HGNC Symbol;Acc:HGNC:28163]
1041	ENSG00000130772	MED18	-0.451234	-0.206704	-3.02751	0.00567285	0.174563	0.123088	18 x 37		1 p35	mediator complex subunit 18 [Source:HGNC Symbol;Acc:HGNC:25944]
1042	ENSG00000103978	TMEM87A	-0.623039	-0.274988	-3.07007	0.00568347	0.174563	0.123156	1 x 13	I	15 q15	transmembrane protein 87A [Source:HGNC Symbol;Acc:HGNC:24522]
1043	ENSG00000116138	DNAJC16	-0.553616	-0.248088	-3.03666	0.00568698	0.174563	0.123179	1 x 10	I	1 p36	DnaJ heat shock protein family (Hsp40) member C16 [Source:HGNC Symbol;Acc:HGNC:29157]
1044	ENSG00000161664	ASB16	-1.06686	-0.424792	-3.02471	0.00568979	0.174563	0.123197	4 x 24		17 q21	ankyrin repeat and SOCS box containing 16 [Source:HGNC Symbol;Acc:HGNC:19768]
1045	ENSG00000135482	ZC3H10	-0.546327	-0.245209	-3.02458	0.00569177	0.174563	0.123209	19 x 36		12 q13	zinc finger CCCH-type containing 10 [Source:HGNC Symbol;Acc:HGNC:25893]
1046	ENSG00000057935	MTA3	-0.50906	-0.230329	-3.02533	0.00569397	0.174563	0.123223	23 x 33		2 p21	metastasis associated 1 family member 3 [Source:HGNC Symbol;Acc:HGNC:23784]
1047	ENSG00000156689	GLYATL2	2.30646	1.6756	3.02845	0.0057383	0.174563	0.123504	40 x 11	D	11 q12	glycine-N-acyltransferase like 2 [Source:HGNC Symbol;Acc:HGNC:24178]
1048	ENSG00000259583	LOC101927751	0.812721	0.472274	3.02338	0.0057472	0.174563	0.12356	10 x 6		15 q26
1049	ENSG00000167981	ZNF597	-1.12217	-0.440774	-3.10076	0.00576004	0.174563	0.12364	1 x 19		16 p13	zinc finger protein 597 [Source:HGNC Symbol;Acc:HGNC:26573]
1050	ENSG00000198718	TOGARAM1	-0.729171	-0.314299	-3.02946	0.0057706	0.174563	0.123706	2 x 18		14 q21	TOG array regulator of axonemal microtubules 1 [Source:HGNC Symbol;Acc:HGNC:19959]
1051	ENSG00000101236	RNF24	0.706791	0.403431	3.01845	0.00577989	0.174563	0.123764	25 x 22		20 p13	ring finger protein 24 [Source:HGNC Symbol;Acc:HGNC:13779]
1052	ENSG00000236054		-1.50212	-0.534468	-3.19295	0.00578438	0.174563	0.123792	7 x 35		22 q12
1053	ENSG00000265888	DSCAS	0.462178	0.252804	3.08756	0.00579308	0.174563	0.123846	18 x 27		18 q12	DSC1/DSC2 antisense RNA [Source:HGNC Symbol;Acc:HGNC:51116]
1054	ENSG00000198589	LRBA	-0.94291	-0.386814	-3.03422	0.00579518	0.174563	0.123859	1 x 9	I	4 q31	LPS responsive beige-like anchor protein [Source:HGNC Symbol;Acc:HGNC:1742]
1055	ENSG00000072134	EPN2	-0.452937	-0.20741	-3.01668	0.00582153	0.174563	0.124022	3 x 21		17 p11	epsin 2 [Source:HGNC Symbol;Acc:HGNC:18639]
1056	ENSG00000072954	TMEM38A	1.33572	0.844183	3.15271	0.00582174	0.174563	0.124024	33 x 27	B	19 p13	transmembrane protein 38A [Source:HGNC Symbol;Acc:HGNC:28462]
1057	ENSG00000224861		0.629343	0.35448	3.02338	0.00582552	0.174563	0.124047	28 x 40		14 q23	Y-box binding protein 1 pseudogene 1 [Source:HGNC Symbol;Acc:HGNC:8015]
1058	ENSG00000125965	GDF5	1.86218	1.27232	3.04342	0.00582599	0.174563	0.12405	33 x 24	B	20 q11	growth differentiation factor 5 [Source:HGNC Symbol;Acc:HGNC:4220]
1059	ENSG00000116741	RGS2	1.46464	0.944035	3.04921	0.00582653	0.174563	0.124053	29 x 1		1 q31	regulator of G protein signaling 2 [Source:HGNC Symbol;Acc:HGNC:9998]
1060	ENSG00000260382		0.737106	0.422909	3.08055	0.00582657	0.174563	0.124053	34 x 18		15 q13
1061	ENSG00000276644	DACH1	-2.20013	-0.633362	-3.01503	0.00583109	0.174563	0.124081	3 x 1		13 q21	dachshund family transcription factor 1 [Source:HGNC Symbol;Acc:HGNC:2663]
1062	ENSG00000130584	ZBTB46	-0.826918	-0.348565	-3.02279	0.00583374	0.174563	0.124098	18 x 19		20 q13	zinc finger and BTB domain containing 46 [Source:HGNC Symbol;Acc:HGNC:16094]
1063	ENSG00000074966	TXK	0.733744	0.420741	3.16619	0.00585518	0.174563	0.124229	14 x 23		4 p12	TXK tyrosine kinase [Source:HGNC Symbol;Acc:HGNC:12434]
1064	ENSG00000170549	IRX1	2.00477	1.39756	3.10685	0.0058606	0.174563	0.124262	13 x 4		5 p15	iroquois homeobox 1 [Source:HGNC Symbol;Acc:HGNC:14358]
1065	ENSG00000197308	GATA3-AS1	-2.06245	-0.621364	-3.01977	0.00587292	0.174563	0.124337	1 x 16	I	10 p14	GATA3 antisense RNA 1 [Source:HGNC Symbol;Acc:HGNC:33786]
1066	ENSG00000075420	FNDC3B	0.820601	0.477483	3.01295	0.00587559	0.174563	0.124354	26 x 7		3 q26	fibronectin type III domain containing 3B [Source:HGNC Symbol;Acc:HGNC:24670]
1067	ENSG00000053524	MCF2L2	1.00174	0.600544	3.06114	0.0058859	0.174563	0.124416	35 x 22	B	3 q27	MCF.2 cell line derived transforming sequence-like 2 [Source:HGNC Symbol;Acc:HGNC:30319]
1068	ENSG00000273143		-0.681204	-0.296804	-3.04583	0.00591622	0.174563	0.1246	15 x 38		10 q25
1069	ENSG00000167522	ANKRD11	0.641444	0.362052	3.03812	0.00592337	0.174563	0.124643	22 x 20		16 q24	ankyrin repeat domain 11 [Source:HGNC Symbol;Acc:HGNC:21316]
1070	ENSG00000237711		0.441825	0.240797	3.11158	0.00592349	0.174563	0.124644	13 x 20		9 p24	mitochondrially encoded cytochrome c oxidase III pseudogene 11 [Source:HGNC Symbol;Acc:HGNC:52041]
1071	ENSG00000064933	PMS1	0.569998	0.317762	3.14604	0.0059258	0.174563	0.124657	30 x 19		2 q32	PMS1 homolog 1, mismatch repair system component [Source:HGNC Symbol;Acc:HGNC:9121]
1072	ENSG00000163406	SLC15A2	1.43701	0.922365	3.02566	0.00593121	0.174563	0.12469	38 x 18	C	3 q13	solute carrier family 15 member 2 [Source:HGNC Symbol;Acc:HGNC:10921]
1073	ENSG00000228672	PROB1	-0.77263	-0.329764	-3.00693	0.00593846	0.174563	0.124733	1 x 6	H	5 q31	proline rich basic protein 1 [Source:HGNC Symbol;Acc:HGNC:41906]
1074	ENSG00000138640	FAM13A	0.780811	0.451306	3.00704	0.00594342	0.174563	0.124763	36 x 19		4 q22	family with sequence similarity 13 member A [Source:HGNC Symbol;Acc:HGNC:19367]
1075	ENSG00000218281		-0.979372	-0.398297	-3.03062	0.00594944	0.174563	0.124799	25 x 14		6 p22	histone cluster 1 H2A pseudogene 3 [Source:HGNC Symbol;Acc:HGNC:18805]
1076	ENSG00000259394		0.372536	0.200521	3.04791	0.00595142	0.174563	0.124811	25 x 37		15 q22
1077	ENSG00000161395	PGAP3	-0.896428	-0.371801	-3.0207	0.00595255	0.174563	0.124818	23 x 14		17 q12	post-GPI attachment to proteins 3 [Source:HGNC Symbol;Acc:HGNC:23719]
1078	ENSG00000117115	PADI2	1.88583	1.29282	3.00559	0.00595788	0.174563	0.12485	40 x 11	D	1 p36	peptidyl arginine deiminase 2 [Source:HGNC Symbol;Acc:HGNC:18341]
1079	ENSG00000118849	RARRES1	1.75217	1.1784	3.02887	0.00596339	0.174563	0.124882	40 x 9	D	3 q25	retinoic acid receptor responder 1 [Source:HGNC Symbol;Acc:HGNC:9867]
1080	ENSG00000140463	BBS4	-0.787862	-0.335097	-3.00967	0.00597341	0.174563	0.124942	6 x 36		15 q24	Bardet-Biedl syndrome 4 [Source:HGNC Symbol;Acc:HGNC:969]
1081	ENSG00000042429	MED17	0.538589	0.298606	3.01652	0.00597993	0.174563	0.124981	33 x 17		11 q21	mediator complex subunit 17 [Source:HGNC Symbol;Acc:HGNC:2375]
1082	ENSG00000113013	HSPA9	-0.495307	-0.224769	-3.02065	0.00598902	0.174563	0.125035	27 x 14		5 q31	heat shock protein family A (Hsp70) member 9 [Source:HGNC Symbol;Acc:HGNC:5244]
1083	ENSG00000187535	IFT140	-0.956101	-0.390998	-3.01829	0.00598909	0.174563	0.125035	1 x 24		16 p13	intraflagellar transport 140 [Source:HGNC Symbol;Acc:HGNC:29077]
1084	ENSG00000162545	CAMK2N1	-1.68313	-0.569222	-3.02926	0.00599486	0.174563	0.125069	2 x 1		1 p36	calcium/calmodulin dependent protein kinase II inhibitor 1 [Source:HGNC Symbol;Acc:HGNC:24190]
1085	ENSG00000246334		0.75375	0.43368	3.02577	0.00599716	0.174563	0.125083	15 x 24		5 q35	PRR7 antisense RNA 1 [Source:HGNC Symbol;Acc:HGNC:27961]
1086	ENSG00000114686	MRPL3	0.572656	0.319392	3.04717	0.00601789	0.174563	0.125205	36 x 31		3 q22	mitochondrial ribosomal protein L3 [Source:HGNC Symbol;Acc:HGNC:10379]
1087	ENSG00000253125		-2.07336	-0.622449	-3.01057	0.00602091	0.174563	0.125223	7 x 38	K	8 p21
1088	ENSG00000163082	SGPP2	1.51973	0.987695	3.0104	0.00602493	0.174563	0.125247	38 x 10	E	2 q36	sphingosine-1-phosphate phosphatase 2 [Source:HGNC Symbol;Acc:HGNC:19953]
1089	ENSG00000133475	GGT2	0.553201	0.307494	3.02629	0.00602666	0.174563	0.125257	36 x 18		22 q11	gamma-glutamyltransferase 2 [Source:HGNC Symbol;Acc:HGNC:4251]
1090	ENSG00000205897		0.78399	0.453386	3.23491	0.00602763	0.174563	0.125262	20 x 23		7 p22	olfactory receptor family 7 subfamily E member 136 pseudogene [Source:HGNC Symbol;Acc:HGNC:19557]
1091	ENSG00000171049	FPR2	1.01559	0.610211	3.00338	0.00602824	0.174563	0.125266	34 x 2	F	19 q13	formyl peptide receptor 2 [Source:HGNC Symbol;Acc:HGNC:3827]
1092	ENSG00000136883	KIF12	-1.79213	-0.587072	-3.0097	0.00605507	0.174563	0.125423	5 x 31		9 q32	kinesin family member 12 [Source:HGNC Symbol;Acc:HGNC:21495]
1093	ENSG00000175040	CHST2	1.33256	0.841775	3.10714	0.0060578	0.174563	0.125439	38 x 20	C	3 q24	carbohydrate sulfotransferase 2 [Source:HGNC Symbol;Acc:HGNC:1970]
1094	ENSG00000100629	CEP128	0.658479	0.372759	3.00625	0.0060614	0.174563	0.12546	28 x 20		14 q31	centrosomal protein 128 [Source:HGNC Symbol;Acc:HGNC:20359]
1095	ENSG00000158296	SLC13A3	1.18546	0.731881	3.05842	0.00609382	0.174563	0.125648	25 x 23		20 q13	solute carrier family 13 member 3 [Source:HGNC Symbol;Acc:HGNC:14430]
1096	ENSG00000225880	LINC00115	0.582557	0.325475	3.00136	0.0060945	0.174563	0.125652	10 x 28		1 p36	long intergenic non-protein coding RNA 115 [Source:HGNC Symbol;Acc:HGNC:26211]
1097	ENSG00000132475	H3F3B	-0.65338	-0.286451	-3.00516	0.00610287	0.174563	0.1257	22 x 40		17 q25	H3 histone family member 3B [Source:HGNC Symbol;Acc:HGNC:4765]
1098	ENSG00000231312	LOC728730	-0.560959	-0.250978	-3.01739	0.00610345	0.174563	0.125703	18 x 39		2 p22
1099	ENSG00000262905		-0.356633	-0.166652	-2.99836	0.00610821	0.174563	0.125731	11 x 17		17 p13
1100	ENSG00000250986		-1.41541	-0.515561	-3.0265	0.00610866	0.174563	0.125733	3 x 23		4 p16
1101	ENSG00000166707	ZCCHC18	0.801169	0.46466	3.06059	0.00612699	0.174563	0.125839	29 x 25		X q22	zinc finger CCHC-type containing 18 [Source:HGNC Symbol;Acc:HGNC:32459]
1102	ENSG00000230701	FBXW4P1	0.581738	0.324972	2.99541	0.00612704	0.174563	0.125839	16 x 24		22 q11	F-box and WD repeat domain containing 4 pseudogene 1 [Source:HGNC Symbol;Acc:HGNC:13609]
1103	ENSG00000138190	EXOC6	-0.737704	-0.317365	-2.99496	0.00612876	0.174563	0.125849	1 x 15	I	10 q23	exocyst complex component 6 [Source:HGNC Symbol;Acc:HGNC:23196]
1104	ENSG00000107331	ABCA2	-1.09361	-0.432596	-3.01746	0.00613048	0.174563	0.125859	2 x 24		9 q34	ATP binding cassette subfamily A member 2 [Source:HGNC Symbol;Acc:HGNC:32]
1105	ENSG00000129244	ATP1B2	-0.828255	-0.349021	-2.99366	0.00613191	0.174563	0.125867	10 x 1		17 p13	ATPase Na+/K+ transporting subunit beta 2 [Source:HGNC Symbol;Acc:HGNC:805]
1106	ENSG00000244515		0.541871	0.300599	2.99347	0.00613367	0.174563	0.125877	24 x 20		3 q25	keratin 18 pseudogene 34 [Source:HGNC Symbol;Acc:HGNC:33403]
1107	ENSG00000185761	ADAMTSL5	-1.56805	-0.547865	-2.99359	0.00613387	0.174563	0.125878	2 x 2	H	19 p13	ADAMTS like 5 [Source:HGNC Symbol;Acc:HGNC:27912]
1108	ENSG00000184068		0.887389	0.522113	2.99406	0.0061355	0.174563	0.125888	16 x 26		22 q13
1109	ENSG00000134874	DZIP1	1.17029	0.720784	3.06583	0.00613625	0.174563	0.125892	13 x 5		13 q32	DAZ interacting zinc finger protein 1 [Source:HGNC Symbol;Acc:HGNC:20908]
1110	ENSG00000258555		0.430404	0.234094	3.01909	0.00615095	0.174563	0.125976	12 x 15		22 q11	SPECC1L-ADORA2A readthrough (NMD candidate) [Source:HGNC Symbol;Acc:HGNC:49185]
1111	ENSG00000275805		-0.72938	-0.314375	-3.03906	0.00615124	0.174563	0.125977	2 x 22		18 q11
1112	ENSG00000120149	MSX2	-1.78869	-0.586544	-3.01904	0.00615412	0.174563	0.125994	2 x 2	H	5 q35	msh homeobox 2 [Source:HGNC Symbol;Acc:HGNC:7392]
1113	ENSG00000186666	BCDIN3D	-0.634241	-0.279241	-2.99686	0.0061808	0.174563	0.126145	19 x 39		12 q13	BCDIN3 domain containing RNA methyltransferase [Source:HGNC Symbol;Acc:HGNC:27050]
1114	ENSG00000150991	UBC	-0.453991	-0.207846	-2.98958	0.00619126	0.174563	0.126204	25 x 12		12 q24	ubiquitin C [Source:HGNC Symbol;Acc:HGNC:12468]
1115	ENSG00000198833	UBE2J1	0.42055	0.228331	2.9922	0.00619968	0.174563	0.126252	33 x 16		6 q15	ubiquitin conjugating enzyme E2 J1 [Source:HGNC Symbol;Acc:HGNC:17598]
1116	ENSG00000166770		1.13667	0.69636	3.01084	0.00619982	0.174563	0.126253	23 x 25		19 q13	ZNF667 antisense RNA 1 (head to head) [Source:HGNC Symbol;Acc:HGNC:44321]
1117	ENSG00000143033	MTF2	0.601595	0.337227	3.01245	0.00620473	0.174563	0.12628	30 x 20		1 p22	metal response element binding transcription factor 2 [Source:HGNC Symbol;Acc:HGNC:29535]
1118	ENSG00000232803	SLCO4A1-AS1	1.95312	1.35174	3.05418	0.00620521	0.174563	0.126283	40 x 18	C	20 q13	SLCO4A1 antisense RNA 1 [Source:HGNC Symbol;Acc:HGNC:40537]
1119	ENSG00000275004	ZNF280B	1.62479	1.07258	3.01873	0.00621639	0.174563	0.126346	36 x 23	B	22 q11	zinc finger protein 280B [Source:HGNC Symbol;Acc:HGNC:23022]
1120	ENSG00000092758	COL9A3	2.21116	1.58586	3.07758	0.00621827	0.174563	0.126356	31 x 25	B	20 q13	collagen type IX alpha 3 chain [Source:HGNC Symbol;Acc:HGNC:2219]
1121	ENSG00000204052	LRRC73	-1.27076	-0.480762	-3.02872	0.00622062	0.174563	0.12637	1 x 37		6 p21	leucine rich repeat containing 73 [Source:HGNC Symbol;Acc:HGNC:21375]
1122	ENSG00000230676		0.429167	0.233369	3.08146	0.00622347	0.174563	0.126386	18 x 26		9 q34
1123	ENSG00000260949		0.711789	0.40663	3.02608	0.0062245	0.174563	0.126391	16 x 26		8 p11
1124	ENSG00000176018	LYSMD3	-0.507877	-0.229852	-2.99596	0.00622503	0.174563	0.126394	1 x 14	I	5 q14	LysM domain containing 3 [Source:HGNC Symbol;Acc:HGNC:26969]
1125	ENSG00000186716	BCR	0.499082	0.274783	3.05477	0.00623221	0.174563	0.126435	23 x 16		22 q11	BCR, RhoGEF and GTPase activating protein [Source:HGNC Symbol;Acc:HGNC:1014]
1126	ENSG00000107551	RASSF4	1.24965	0.779315	3.10843	0.00623518	0.174563	0.126451	34 x 3	F	10 q11	Ras association domain family member 4 [Source:HGNC Symbol;Acc:HGNC:20793]
1127	ENSG00000100721	TCL1A	1.9573	1.35543	3.13543	0.00624152	0.174563	0.126487	37 x 4	E	14 q32	T-cell leukemia/lymphoma 1A [Source:HGNC Symbol;Acc:HGNC:11648]
1128	ENSG00000077935	SMC1B	1.93844	1.33881	3.04022	0.00624635	0.174563	0.126514	39 x 24	C	22 q13	structural maintenance of chromosomes 1B [Source:HGNC Symbol;Acc:HGNC:11112]
1129	ENSG00000065491	TBC1D22B	0.593505	0.332225	3.05011	0.00625556	0.174563	0.126565	25 x 21		6 p21	TBC1 domain family member 22B [Source:HGNC Symbol;Acc:HGNC:21602]
1130	ENSG00000149269	PAK1	0.584297	0.326547	2.98513	0.00625806	0.174563	0.126579	20 x 35		11 q14	p21 (RAC1) activated kinase 1 [Source:HGNC Symbol;Acc:HGNC:8590]
1131	ENSG00000169955	ZNF747	-0.638398	-0.280813	-3.0151	0.00628539	0.174563	0.12673	17 x 40		16 p11	zinc finger protein 747 [Source:HGNC Symbol;Acc:HGNC:28350]
1132	ENSG00000217181		0.529135	0.292877	2.98339	0.00628815	0.174563	0.126745	17 x 24		6 p24
1133	ENSG00000255120	OVOL1-AS1	-0.625995	-0.276113	-2.98355	0.00628877	0.174563	0.126749	15 x 34		11 q13	OVOL1 antisense RNA 1 [Source:HGNC Symbol;Acc:HGNC:49319]
1134	ENSG00000118513	MYB	-1.47892	-0.529553	-2.99341	0.00629209	0.174563	0.126767	6 x 40	K	6 q23	MYB proto-oncogene, transcription factor [Source:HGNC Symbol;Acc:HGNC:7545]
1135	ENSG00000217442	SYCE3	-0.853733	-0.357641	-3.0942	0.00629243	0.174563	0.126769	16 x 40		22 q13	synaptonemal complex central element protein 3 [Source:HGNC Symbol;Acc:HGNC:35245]
1136	ENSG00000185591	SP1	-0.422165	-0.194583	-3.04172	0.00629625	0.174563	0.12679	4 x 12		12 q13	Sp1 transcription factor [Source:HGNC Symbol;Acc:HGNC:11205]
1137	ENSG00000073910	FRY	-0.799204	-0.339039	-2.98443	0.00629738	0.174563	0.126796	3 x 4	H	13 q13	FRY microtubule binding protein [Source:HGNC Symbol;Acc:HGNC:20367]
1138	ENSG00000138670	RASGEF1B	1.02112	0.614088	3.035	0.00629975	0.174563	0.126809	36 x 11		4 q21	RasGEF domain family member 1B [Source:HGNC Symbol;Acc:HGNC:24881]
1139	ENSG00000204950	LRRC10B	-1.62181	-0.558164	-3.03842	0.0063097	0.174563	0.126864	29 x 29		11 q12	leucine rich repeat containing 10B [Source:HGNC Symbol;Acc:HGNC:37215]
1140	ENSG00000006453	BAIAP2L1	0.976978	0.583342	3.02828	0.00631068	0.174563	0.12687	35 x 16		7 q22	BAI1 associated protein 2 like 1 [Source:HGNC Symbol;Acc:HGNC:21649]
1141	ENSG00000135898	GPR55	1.16172	0.714535	3.04522	0.00631114	0.174563	0.126872	33 x 9		2 q37	G protein-coupled receptor 55 [Source:HGNC Symbol;Acc:HGNC:4511]
1142	ENSG00000104953	TLE6	-1.30981	-0.490557	-2.99357	0.00631798	0.174563	0.12691	14 x 40		19 p13	transducin like enhancer of split 6 [Source:HGNC Symbol;Acc:HGNC:30788]
1143	ENSG00000166816	LDHD	-1.29513	-0.48691	-2.98605	0.00632536	0.174563	0.12695	13 x 40		16 q23	lactate dehydrogenase D [Source:HGNC Symbol;Acc:HGNC:19708]
1144	ENSG00000197312	DDI2	-0.527657	-0.237788	-2.98195	0.00633089	0.174563	0.12698	3 x 10	I	1 p36	DNA damage inducible 1 homolog 2 [Source:HGNC Symbol;Acc:HGNC:24578]
1145	ENSG00000159708	LRRC36	-0.653844	-0.286625	-2.9922	0.00633151	0.174563	0.126984	3 x 30		16 q22	leucine rich repeat containing 36 [Source:HGNC Symbol;Acc:HGNC:25615]
1146	ENSG00000165325	DEUP1	1.18399	0.730804	3.05465	0.00634439	0.174563	0.127054	34 x 22	B	11 q21	deuterosome assembly protein 1 [Source:HGNC Symbol;Acc:HGNC:26344]
1147	ENSG00000143801	PSEN2	-0.685702	-0.298464	-2.98164	0.00635301	0.174563	0.127101	23 x 17		1 q42	presenilin 2 [Source:HGNC Symbol;Acc:HGNC:9509]
1148	ENSG00000182158	CREB3L2	0.812194	0.471926	2.99029	0.00635591	0.174563	0.127117	9 x 7		7 q33	cAMP responsive element binding protein 3 like 2 [Source:HGNC Symbol;Acc:HGNC:23720]
1149	ENSG00000196396	PTPN1	-0.546276	-0.245189	-3.00571	0.0063577	0.174563	0.127126	25 x 14		20 q13	protein tyrosine phosphatase, non-receptor type 1 [Source:HGNC Symbol;Acc:HGNC:9642]
1150	ENSG00000151835	SACS	0.984277	0.5884	2.98004	0.00635865	0.188344	0.127132	12 x 7		13 q12	sacsin molecular chaperone [Source:HGNC Symbol;Acc:HGNC:10519]
1151	ENSG00000006652	IFRD1	1.11287	0.679202	2.99341	0.0064041	0.188344	0.127425	37 x 21	C	7 q31	interferon related developmental regulator 1 [Source:HGNC Symbol;Acc:HGNC:5456]
1152	ENSG00000162408	NOL9	0.451529	0.246512	3.01545	0.00640675	0.188344	0.127442	25 x 20		1 p36	nucleolar protein 9 [Source:HGNC Symbol;Acc:HGNC:26265]
1153	ENSG00000259278		-0.469035	-0.214046	-3.01349	0.00641584	0.188344	0.127501	24 x 33		15 q14
1154	ENSG00000270084	GAS5-AS1	-0.501213	-0.227161	-3.09455	0.00643008	0.188344	0.127592	11 x 33		1 q25	GAS5 antisense RNA 1 [Source:HGNC Symbol;Acc:HGNC:44119]
1155	ENSG00000143401	ANP32E	1.02919	0.619747	3.00463	0.00643454	0.188344	0.127621	37 x 24	C	1 q21	acidic nuclear phosphoprotein 32 family member E [Source:HGNC Symbol;Acc:HGNC:16673]
1156	ENSG00000078114	NEBL	-1.22916	-0.470001	-3.02341	0.00644221	0.188344	0.12767	1 x 4	H	10 p12	nebulette [Source:HGNC Symbol;Acc:HGNC:16932]
1157	ENSG00000149403	GRIK4	-1.26602	-0.479552	-3.10515	0.00646339	0.188344	0.127805	1 x 36		11 q23	glutamate ionotropic receptor kainate type subunit 4 [Source:HGNC Symbol;Acc:HGNC:4582]
1158	ENSG00000066557	LRRC40	0.64606	0.364948	3.00133	0.00646665	0.188344	0.127825	31 x 18		1 p31	leucine rich repeat containing 40 [Source:HGNC Symbol;Acc:HGNC:26004]
1159	ENSG00000108443	RPS6KB1	-0.539219	-0.242392	-2.97832	0.00647098	0.188344	0.127853	1 x 13	I	17 q23	ribosomal protein S6 kinase B1 [Source:HGNC Symbol;Acc:HGNC:10436]
1160	ENSG00000237248	LINC00987	0.770244	0.444406	2.99173	0.00647652	0.188344	0.127888	15 x 7		12 p13	long intergenic non-protein coding RNA 987 [Source:HGNC Symbol;Acc:HGNC:48911]
1161	ENSG00000271234		0.367264	0.197496	2.97551	0.00649076	0.188344	0.127978	18 x 30		6 q27
1162	ENSG00000243795	LINC02044	0.570738	0.318216	2.9916	0.00650786	0.188344	0.128086	19 x 25		3 q13	long intergenic non-protein coding RNA 2044 [Source:HGNC Symbol;Acc:HGNC:52884]
1163	ENSG00000197322		0.56034	0.311851	3.2226	0.00652309	0.188344	0.128182	16 x 12		17 q12	chromosome 17 open reading frame 102 [Source:HGNC Symbol;Acc:HGNC:34412]
1164	ENSG00000162783	IER5	-0.849948	-0.356368	-2.99745	0.00652518	0.188344	0.128195	36 x 14		1 q25	immediate early response 5 [Source:HGNC Symbol;Acc:HGNC:5393]
1165	ENSG00000162779	AXDND1	-0.662192	-0.289746	-2.96762	0.00652692	0.188344	0.128206	1 x 30		1 q25	axonemal dynein light chain domain containing 1 [Source:HGNC Symbol;Acc:HGNC:26564]
1166	ENSG00000224251		0.643408	0.363284	3.01492	0.00654657	0.188344	0.128329	34 x 20		10 p15
1167	ENSG00000167106	FAM102A	-0.987648	-0.400867	-2.96502	0.00657374	0.188344	0.128498	12 x 39		9 q34	family with sequence similarity 102 member A [Source:HGNC Symbol;Acc:HGNC:31419]
1168	ENSG00000197776	KLHDC1	-0.649143	-0.284861	-2.96462	0.00657395	0.188344	0.128499	1 x 26		14 q21	kelch domain containing 1 [Source:HGNC Symbol;Acc:HGNC:19836]
1169	ENSG00000185168		-1.09873	-0.434074	-3.01059	0.00658325	0.188344	0.128557	17 x 15		17 q25	long intergenic non-protein coding RNA 482 [Source:HGNC Symbol;Acc:HGNC:26816]
1170	ENSG00000238057	ZEB2-AS1	0.373573	0.201118	2.97445	0.00658775	0.188344	0.128585	31 x 5		2 q22	ZEB2 antisense RNA 1 [Source:HGNC Symbol;Acc:HGNC:37149]
1171	ENSG00000166477	LEO1	-0.964856	-0.393756	-3.03529	0.00658899	0.188344	0.128593	1 x 13	I	15 q21	LEO1 homolog, Paf1/RNA polymerase II complex component [Source:HGNC Symbol;Acc:HGNC:30401]
1172	ENSG00000224950		0.709212	0.40498	2.99091	0.00660004	0.188344	0.128661	15 x 23		1 p13
1173	ENSG00000156219	ART3	2.711	2.07623	2.98865	0.00660066	0.188344	0.128665	37 x 20	C	4 q21	ADP-ribosyltransferase 3 [Source:HGNC Symbol;Acc:HGNC:725]
1174	ENSG00000183621	ZNF438	0.537938	0.298211	2.96342	0.00660745	0.188344	0.128707	32 x 10		10 p11	zinc finger protein 438 [Source:HGNC Symbol;Acc:HGNC:21029]
1175	ENSG00000266644		-0.585702	-0.260637	-2.99598	0.00662299	0.188344	0.128802	12 x 33		17 q24
1176	ENSG00000226235	LEMD1-AS1	0.624902	0.351709	3.18446	0.00664674	0.188344	0.128948	21 x 24		1 q32	LEMD1 antisense RNA 1 [Source:HGNC Symbol;Acc:HGNC:44132]
1177	ENSG00000173801	JUP	-0.800555	-0.339507	-2.99246	0.00668053	0.188344	0.129154	23 x 15		17 q21	junction plakoglobin [Source:HGNC Symbol;Acc:HGNC:6207]
1178	ENSG00000183580	FBXL7	-1.19191	-0.460077	-2.96332	0.00668487	0.188344	0.12918	3 x 1		5 p15	F-box and leucine rich repeat protein 7 [Source:HGNC Symbol;Acc:HGNC:13604]
1179	ENSG00000273387		0.916723	0.541989	2.95726	0.00670245	0.188344	0.129287	20 x 25		22 q12
1180	ENSG00000225889		0.883639	0.519584	3.0622	0.00671208	0.188344	0.129345	16 x 25		2 p14
1181	ENSG00000054803	CBLN4	-1.12907	-0.442727	-2.96933	0.00672027	0.188344	0.129394	17 x 2	G	20 q13	cerebellin 4 precursor [Source:HGNC Symbol;Acc:HGNC:16231]
1182	ENSG00000259374		1.70268	1.13691	3.02886	0.00672235	0.188344	0.129407	39 x 11	D	14 q32	NADH:ubiquinone oxidoreductase subunit B4 pseudogene 11 [Source:HGNC Symbol;Acc:HGNC:45259]
1183	ENSG00000068650	ATP11A	1.27995	0.801989	2.95981	0.00673516	0.188344	0.129484	40 x 16	C	13 q34	ATPase phospholipid transporting 11A [Source:HGNC Symbol;Acc:HGNC:13552]
1184	ENSG00000165905	LARGE2	1.61615	1.06552	2.96144	0.00674877	0.188344	0.129566	22 x 23		11 p11	LARGE xylosyl- and glucuronyltransferase 2 [Source:HGNC Symbol;Acc:HGNC:16522]
1185	ENSG00000168209	DDIT4	1.25254	0.781471	2.95362	0.00674886	0.188344	0.129566	40 x 16	C	10 q22	DNA damage inducible transcript 4 [Source:HGNC Symbol;Acc:HGNC:24944]
1186	ENSG00000272940		-0.44177	-0.202776	-3.00384	0.00675338	0.188344	0.129593	17 x 16		22 q13
1187	ENSG00000228401	HSPC324	-0.485167	-0.220647	-2.96013	0.00675408	0.188344	0.129598	16 x 9		9 q34	uncharacterized LOC101928612 [Source:NCBI gene;Acc:101928612]
1188	ENSG00000275186		1.02777	0.618754	3.12113	0.00676094	0.188344	0.129639	22 x 22		18 q23
1189	ENSG00000135925	WNT10A	1.54801	1.01033	3.1519	0.00679092	0.188344	0.129817	24 x 25		2 q35	Wnt family member 10A [Source:HGNC Symbol;Acc:HGNC:13829]
1190	ENSG00000168916	ZNF608	1.10926	0.676609	2.95596	0.00679381	0.188344	0.129834	8 x 5		5 q23	zinc finger protein 608 [Source:HGNC Symbol;Acc:HGNC:29238]
1191	ENSG00000167565	SERTAD3	-0.637871	-0.280614	-2.958	0.00679618	0.188344	0.129848	21 x 39		19 q13	SERTA domain containing 3 [Source:HGNC Symbol;Acc:HGNC:17931]
1192	ENSG00000172216	CEBPB	1.10639	0.674545	2.98305	0.00679821	0.188344	0.12986	38 x 11		20 q13	CCAAT/enhancer binding protein beta [Source:HGNC Symbol;Acc:HGNC:1834]
1193	ENSG00000232818		0.884202	0.519964	2.96981	0.00680954	0.188344	0.129928	33 x 28		7 p15	ribosomal protein S2 pseudogene 32 [Source:HGNC Symbol;Acc:HGNC:30518]
1194	ENSG00000213920	MDP1	-0.770061	-0.32886	-2.95025	0.00681308	0.188344	0.129948	19 x 40		14 q12	magnesium dependent phosphatase 1 [Source:HGNC Symbol;Acc:HGNC:28781]
1195	ENSG00000224259	LINC01133	2.06078	1.44784	3.12009	0.00682698	0.188344	0.130031	40 x 11	D	1 q23	long intergenic non-protein coding RNA 1133 [Source:HGNC Symbol;Acc:HGNC:49447]
1196	ENSG00000144130	NT5DC4	1.01898	0.61259	2.96579	0.0068304	0.188344	0.130051	38 x 23	C	2 q14	5'-nucleotidase domain containing 4 [Source:HGNC Symbol;Acc:HGNC:27678]
1197	ENSG00000198466	ZNF587	-0.912036	-0.376889	-2.99681	0.00683819	0.188344	0.130097	3 x 22		19 q13	zinc finger protein 587 [Source:HGNC Symbol;Acc:HGNC:30955]
1198	ENSG00000140332	TLE3	-0.684454	-0.298004	-2.95867	0.00683826	0.188344	0.130097	1 x 5	H	15 q23	transducin like enhancer of split 3 [Source:HGNC Symbol;Acc:HGNC:11839]
1199	ENSG00000228175		0.783552	0.4531	2.96019	0.00684773	0.188344	0.130153	34 x 31		1 p22	gem nuclear organelle associated protein 8 pseudogene 4 [Source:HGNC Symbol;Acc:HGNC:37979]
1200	ENSG00000102890	ELMO3	-1.08586	-0.43035	-3.05291	0.00684787	0.188344	0.130154	15 x 40		16 q22	engulfment and cell motility 3 [Source:HGNC Symbol;Acc:HGNC:17289]
1201	ENSG00000167925	GHDC	-0.838906	-0.35264	-2.95053	0.00686026	0.188344	0.130226	15 x 39		17 q21	GH3 domain containing [Source:HGNC Symbol;Acc:HGNC:24438]
1202	ENSG00000141741	MIEN1	-0.900484	-0.373128	-2.9474	0.00686493	0.188344	0.130254	38 x 37		17 q12	migration and invasion enhancer 1 [Source:HGNC Symbol;Acc:HGNC:28230]
1203	ENSG00000134873	CLDN10	2.15621	1.53492	3.00784	0.00689241	0.188344	0.130414	40 x 12	D	13 q32	claudin 10 [Source:HGNC Symbol;Acc:HGNC:2033]
1204	ENSG00000174233	ADCY6	-0.726416	-0.313307	-2.94474	0.00689939	0.188344	0.130454	1 x 6	H	12 q13	adenylate cyclase 6 [Source:HGNC Symbol;Acc:HGNC:237]
1205	ENSG00000136457	CHAD	-2.40238	-0.644296	-2.98539	0.00690259	0.188344	0.130473	2 x 24		17 q21	chondroadherin [Source:HGNC Symbol;Acc:HGNC:1909]
1206	ENSG00000076003	MCM6	0.813995	0.473115	2.96484	0.00691829	0.188344	0.130564	39 x 26	A	2 q21	minichromosome maintenance complex component 6 [Source:HGNC Symbol;Acc:HGNC:6949]
1207	ENSG00000152518	ZFP36L2	0.935014	0.554468	2.99623	0.0069231	0.188344	0.130592	10 x 7		2 p21	ZFP36 ring finger protein like 2 [Source:HGNC Symbol;Acc:HGNC:1108]
1208	ENSG00000259258		-0.315783	-0.148819	-3.01999	0.00692858	0.188344	0.130624	11 x 15		15 q22
1209	ENSG00000248663		-1.88255	-0.600126	-2.94199	0.00693814	0.188344	0.130679	40 x 32	A	5 q23	long intergenic non-protein coding RNA 992 [Source:HGNC Symbol;Acc:HGNC:48943]
1210	ENSG00000148219	ASTN2	-1.30315	-0.488907	-2.95019	0.00694135	0.188344	0.130697	7 x 38	K	9 q33	astrotactin 2 [Source:HGNC Symbol;Acc:HGNC:17021]
1211	ENSG00000237515	SHISA9	-2.43062	-0.64519	-2.95077	0.00694216	0.188344	0.130702	3 x 2	H	16 p13	shisa family member 9 [Source:HGNC Symbol;Acc:HGNC:37231]
1212	ENSG00000087191	PSMC5	-0.685454	-0.298372	-2.98053	0.00694834	0.188344	0.130738	40 x 34	A	17 q23	proteasome 26S subunit, ATPase 5 [Source:HGNC Symbol;Acc:HGNC:9552]
1213	ENSG00000065054	SLC9A3R2	-1.1014	-0.434842	-2.94168	0.00695429	0.188344	0.130772	14 x 40		16 p13	SLC9A3 regulator 2 [Source:HGNC Symbol;Acc:HGNC:11076]
1214	ENSG00000183401	CCDC159	-0.786366	-0.334575	-2.94346	0.00695464	0.188344	0.130774	8 x 33		19 p13	coiled-coil domain containing 159 [Source:HGNC Symbol;Acc:HGNC:26996]
1215	ENSG00000226942		-0.739766	-0.318104	-3.00337	0.0069672	0.188344	0.130846	5 x 23		16 p13	interleukin 9 receptor pseudogene 3 [Source:HGNC Symbol;Acc:HGNC:6033]
1216	ENSG00000105649	RAB3A	-0.95782	-0.391541	-2.94198	0.00697367	0.188344	0.130883	16 x 40		19 p13	RAB3A, member RAS oncogene family [Source:HGNC Symbol;Acc:HGNC:9777]
1217	ENSG00000213145	CRIP1	-1.29349	-0.4865	-2.96195	0.00698002	0.188344	0.130919	15 x 40		14 q32	cysteine rich protein 1 [Source:HGNC Symbol;Acc:HGNC:2360]
1218	ENSG00000225526	MKRN2OS	-1.17623	-0.455821	-2.93967	0.00698437	0.188344	0.130944	13 x 40		3 p25	MKRN2 opposite strand [Source:HGNC Symbol;Acc:HGNC:40375]
1219	ENSG00000104221	BRF2	-0.983624	-0.399619	-2.95834	0.00700281	0.188344	0.131049	26 x 15		8 p11	BRF2, RNA polymerase III transcription initiation factor subunit [Source:HGNC Symbol;Acc:HGNC:17298]
1220	ENSG00000118113	MMP8	0.941387	0.558831	2.96707	0.00700751	0.188344	0.131076	26 x 5		11 q22	matrix metallopeptidase 8 [Source:HGNC Symbol;Acc:HGNC:7175]
1221	ENSG00000149930	TAOK2	-0.411949	-0.190284	-2.94542	0.00700988	0.188344	0.13109	20 x 16		16 p11	TAO kinase 2 [Source:HGNC Symbol;Acc:HGNC:16835]
1222	ENSG00000065413	ANKRD44	0.648783	0.366658	2.93782	0.00703582	0.188344	0.131237	33 x 5		2 q33	ankyrin repeat domain 44 [Source:HGNC Symbol;Acc:HGNC:25259]
1223	ENSG00000109205	ODAM	2.37612	1.74232	3.14302	0.00704552	0.188344	0.131291	30 x 23	B	4 q13	odontogenic, ameloblast asssociated [Source:HGNC Symbol;Acc:HGNC:26043]
1224	ENSG00000130768	SMPDL3B	1.08462	0.658976	2.9395	0.00704943	0.188344	0.131314	33 x 31		1 p35	sphingomyelin phosphodiesterase acid like 3B [Source:HGNC Symbol;Acc:HGNC:21416]
1225	ENSG00000236508		0.511693	0.282355	2.96769	0.00705097	0.188344	0.131322	35 x 19		3 q29	ATP13A5 antisense RNA 1 [Source:HGNC Symbol;Acc:HGNC:41281]
1226	ENSG00000270069		0.893362	0.526146	2.94977	0.00706802	0.188344	0.131418	38 x 13		X p11	MIR222 host gene [Source:HGNC Symbol;Acc:HGNC:49555]
1227	ENSG00000183735	TBK1	-0.391953	-0.18181	-2.9836	0.0070726	0.188344	0.131444	1 x 13	I	12 q14	TANK binding kinase 1 [Source:HGNC Symbol;Acc:HGNC:11584]
1228	ENSG00000116176	TPSG1	-1.69588	-0.571429	-3.02964	0.00708099	0.188344	0.131491	1 x 2	H	16 p13	tryptase gamma 1 [Source:HGNC Symbol;Acc:HGNC:14134]
1229	ENSG00000261670		-0.584431	-0.260144	-2.94411	0.0070864	0.188344	0.131521	12 x 31		8 q22
1230	ENSG00000164691	TAGAP	1.13879	0.697892	2.98866	0.0070938	0.188344	0.131563	36 x 1	F	6 q25	T-cell activation RhoGTPase activating protein [Source:HGNC Symbol;Acc:HGNC:15669]
1231	ENSG00000102048	ASB9	1.0175	0.611552	2.93293	0.00713168	0.188344	0.131774	34 x 21	B	X p22	ankyrin repeat and SOCS box containing 9 [Source:HGNC Symbol;Acc:HGNC:17184]
1232	ENSG00000272779		0.488902	0.268694	2.93193	0.00715473	0.188344	0.131901	32 x 15		22 q11
1233	ENSG00000180891	CUEDC1	-0.893755	-0.370925	-2.9485	0.00716326	0.188344	0.131948	22 x 13		17 q22	CUE domain containing 1 [Source:HGNC Symbol;Acc:HGNC:31350]
1234	ENSG00000228634		-0.672087	-0.293428	-3.04619	0.00716895	0.188344	0.13198	8 x 19		1 p35
1235	ENSG00000163001	CFAP36	-0.627893	-0.276834	-2.94202	0.00718002	0.188344	0.132041	20 x 39		2 p16	cilia and flagella associated protein 36 [Source:HGNC Symbol;Acc:HGNC:30540]
1236	ENSG00000149573	MPZL2	1.09643	0.667415	2.931	0.00718146	0.188344	0.132049	40 x 16	C	11 q23	myelin protein zero like 2 [Source:HGNC Symbol;Acc:HGNC:3496]
1237	ENSG00000184154	LRTOMT	-0.80841	-0.34222	-2.9653	0.00718446	0.188344	0.132065	5 x 38		11 q13	leucine rich transmembrane and O-methyltransferase domain containing [Source:HGNC Symbol;Acc:HGNC:25033]
1238	ENSG00000180530	NRIP1	-1.01889	-0.41045	-2.94687	0.00718976	0.188344	0.132094	1 x 8	H	21 q21	nuclear receptor interacting protein 1 [Source:HGNC Symbol;Acc:HGNC:8001]
1239	ENSG00000008869	HEATR5B	-0.512471	-0.231702	-2.93042	0.00720209	0.188344	0.132162	3 x 9	I	2 p22	HEAT repeat containing 5B [Source:HGNC Symbol;Acc:HGNC:29273]
1240	ENSG00000273403		0.974931	0.581926	3.03958	0.00721894	0.188344	0.132254	23 x 25		3 q27
1241	ENSG00000235072		0.960844	0.5722	2.93603	0.00722366	0.188344	0.13228	24 x 24		2 p23
1242	ENSG00000137261	KIAA0319	-1.64793	-0.562963	-2.95645	0.00723209	0.188344	0.132326	39 x 24	C	6 p22	KIAA0319 [Source:HGNC Symbol;Acc:HGNC:21580]
1243	ENSG00000238290		0.79203	0.458656	3.02536	0.00723738	0.188344	0.132354	16 x 26		1 p36
1244	ENSG00000225194	LINC00092	1.87065	1.27965	3.13595	0.00723758	0.188344	0.132355	37 x 21	C	9 q22	long intergenic non-protein coding RNA 92 [Source:HGNC Symbol;Acc:HGNC:31408]
1245	ENSG00000196917	HCAR1	-1.73616	-0.578195	-2.95188	0.00724065	0.188344	0.132372	7 x 40	K	12 q24	hydroxycarboxylic acid receptor 1 [Source:HGNC Symbol;Acc:HGNC:4532]
1246	ENSG00000168806	LCMT2	-0.524366	-0.236473	-2.92732	0.00724358	0.188344	0.132388	17 x 38		15 q15	leucine carboxyl methyltransferase 2 [Source:HGNC Symbol;Acc:HGNC:17558]
1247	ENSG00000278948		0.976006	0.58267	2.95167	0.00724906	0.188344	0.132418	11 x 7		22 q13
1248	ENSG00000248360	LINC00504	-2.09572	-0.624602	-2.95678	0.00726084	0.188344	0.132482	1 x 19		4 p15	long intergenic non-protein coding RNA 504 [Source:HGNC Symbol;Acc:HGNC:43555]
1249	ENSG00000260428	SCX	0.824742	0.480224	2.98388	0.00727177	0.188344	0.132541	32 x 29		8 q24	scleraxis bHLH transcription factor [Source:HGNC Symbol;Acc:HGNC:32322]
1250	ENSG00000149639	SOGA1	-0.537653	-0.24177	-2.92853	0.00727504	0.188344	0.132558	1 x 7	H	20 q11	suppressor of glucose, autophagy associated 1 [Source:HGNC Symbol;Acc:HGNC:16111]
1251	ENSG00000230581		0.429959	0.233833	2.92274	0.00728378	0.188344	0.132605	25 x 37		9 p24	actin gamma 1 pseudogene 14 [Source:HGNC Symbol;Acc:HGNC:49751]
1252	ENSG00000164081	TEX264	-0.678363	-0.295754	-2.9273	0.00728656	0.188344	0.13262	16 x 40		3 p21	testis expressed 264 [Source:HGNC Symbol;Acc:HGNC:30247]
1253	ENSG00000147003	TMEM27	1.10626	0.674452	2.95016	0.00730756	0.188344	0.132733	20 x 26		X p22	transmembrane protein 27 [Source:HGNC Symbol;Acc:HGNC:29437]
1254	ENSG00000257809		-0.411171	-0.189955	-2.92735	0.0073104	0.188344	0.132748	10 x 32		12 q13
1255	ENSG00000186910	SERPINA11	-2.23181	-0.635601	-2.96025	0.0073126	0.188344	0.13276	8 x 39	K	14 q32	serpin family A member 11 [Source:HGNC Symbol;Acc:HGNC:19193]
1256	ENSG00000040608	RTN4R	0.952956	0.566771	2.93479	0.00732123	0.188344	0.132806	32 x 29		22 q11	reticulon 4 receptor [Source:HGNC Symbol;Acc:HGNC:18601]
1257	ENSG00000171433	GLOD5	-0.821734	-0.346795	-2.92264	0.0073287	0.188344	0.132846	14 x 39		X p11	glyoxalase domain containing 5 [Source:HGNC Symbol;Acc:HGNC:33358]
1258	ENSG00000269220	LINC00528	0.507276	0.279699	2.94103	0.00733554	0.188344	0.132883	34 x 6		22 q11	long intergenic non-protein coding RNA 528 [Source:HGNC Symbol;Acc:HGNC:26875]
1259	ENSG00000141837	CACNA1A	1.04009	0.627412	3.10801	0.00733664	0.188344	0.132889	23 x 25		19 p13	calcium voltage-gated channel subunit alpha1 A [Source:HGNC Symbol;Acc:HGNC:1388]
1260	ENSG00000211647		0.476491	0.261297	2.96032	0.00734463	0.188344	0.132931	35 x 7		22 q11	immunoglobulin lambda variable 5-48 (non-functional) [Source:HGNC Symbol;Acc:HGNC:5925]
1261	ENSG00000169762	TAPT1	-0.726076	-0.313184	-2.91943	0.00737512	0.188344	0.133093	11 x 37		4 p15	transmembrane anterior posterior transformation 1 [Source:HGNC Symbol;Acc:HGNC:26887]
1262	ENSG00000228063		0.500532	0.275652	2.91975	0.00738728	0.188344	0.133158	20 x 27		1 q41	LYPLAL1 antisense RNA 1 (head to head) [Source:HGNC Symbol;Acc:HGNC:50560]
1263	ENSG00000128342	LIF	1.78791	1.20865	3.13405	0.00739005	0.188344	0.133172	28 x 1		22 q12	LIF, interleukin 6 family cytokine [Source:HGNC Symbol;Acc:HGNC:6596]
1264	ENSG00000168259	DNAJC7	-0.462559	-0.211383	-2.91632	0.00739203	0.188344	0.133183	25 x 14		17 q21	DnaJ heat shock protein family (Hsp40) member C7 [Source:HGNC Symbol;Acc:HGNC:12392]
1265	ENSG00000176476	SGF29	-0.502098	-0.227519	-2.91537	0.0073926	0.188344	0.133186	34 x 37		16 p11	SAGA complex associated factor 29 [Source:HGNC Symbol;Acc:HGNC:25156]
1266	ENSG00000011590	ZBTB32	0.771125	0.444981	2.92585	0.00739541	0.188344	0.1332	34 x 7		19 q13	zinc finger and BTB domain containing 32 [Source:HGNC Symbol;Acc:HGNC:16763]
1267	ENSG00000280217		-0.791146	-0.336241	-3.01275	0.00740444	0.188344	0.133248	3 x 34		12 q24
1268	ENSG00000179840	PIK3CD-AS1	0.52225	0.288716	2.98038	0.00741159	0.188344	0.133286	32 x 6		1 p36	PIK3CD antisense RNA 1 [Source:HGNC Symbol;Acc:HGNC:32346]
1269	ENSG00000240682	ISY1	0.487665	0.267955	2.91439	0.00741341	0.188344	0.133295	34 x 31		3 q21	ISY1 splicing factor homolog [Source:HGNC Symbol;Acc:HGNC:29201]
1270	ENSG00000066583	ISOC1	-1.08096	-0.428924	-2.95862	0.00742297	0.188344	0.133345	21 x 39		5 q23	isochorismatase domain containing 1 [Source:HGNC Symbol;Acc:HGNC:24254]
1271	ENSG00000099991	CABIN1	0.501637	0.276314	3.00561	0.00743435	0.188344	0.133405	22 x 14		22 q11	calcineurin binding protein 1 [Source:HGNC Symbol;Acc:HGNC:24187]
1272	ENSG00000213983	AP1G2	-0.774759	-0.330512	-2.9142	0.00743448	0.188344	0.133406	4 x 27		14 q11	adaptor related protein complex 1 gamma 2 subunit [Source:HGNC Symbol;Acc:HGNC:556]
1273	ENSG00000262420		0.418351	0.227047	2.92106	0.0074505	0.188344	0.133489	30 x 33		16 p13
1274	ENSG00000112655	PTK7	0.751184	0.432016	2.92972	0.00746019	0.188344	0.13354	20 x 7		6 p21	protein tyrosine kinase 7 (inactive) [Source:HGNC Symbol;Acc:HGNC:9618]
1275	ENSG00000232938	RPL23AP87	-0.75383	-0.323119	-2.94369	0.00746299	0.188344	0.133555	22 x 34		17 q25	ribosomal protein L23a pseudogene 87 [Source:HGNC Symbol;Acc:HGNC:51578]
1276	ENSG00000122068	FYTTD1	0.319299	0.170212	2.91492	0.00746983	0.188344	0.13359	29 x 16		3 q29	forty-two-three domain containing 1 [Source:HGNC Symbol;Acc:HGNC:25407]
1277	ENSG00000170915	PAQR8	0.902078	0.532045	2.98611	0.00747132	0.188344	0.133598	33 x 21		6 p12	progestin and adipoQ receptor family member 8 [Source:HGNC Symbol;Acc:HGNC:15708]
1278	ENSG00000178498	DTX3	-0.759573	-0.325157	-2.93089	0.0074748	0.188344	0.133616	2 x 33		12 q13	deltex E3 ubiquitin ligase 3 [Source:HGNC Symbol;Acc:HGNC:24457]
1279	ENSG00000169031	COL4A3	1.04071	0.627855	3.0196	0.00747762	0.188344	0.133631	22 x 25		2 q36	collagen type IV alpha 3 chain [Source:HGNC Symbol;Acc:HGNC:2204]
1280	ENSG00000214456	PLIN5	-1.62094	-0.558	-2.91046	0.00748011	0.188344	0.133644	11 x 40	K	19 p13	perilipin 5 [Source:HGNC Symbol;Acc:HGNC:33196]
1281	ENSG00000225511		-0.927439	-0.381864	-2.92746	0.00748019	0.188344	0.133644	3 x 1		9 q22	long intergenic non-protein coding RNA 475 [Source:HGNC Symbol;Acc:HGNC:23569]
1282	ENSG00000151413	NUBPL	-0.690082	-0.300076	-2.94057	0.00748332	0.188344	0.13366	2 x 15	I	14 q12	nucleotide binding protein like [Source:HGNC Symbol;Acc:HGNC:20278]
1283	ENSG00000172159	FRMD3	1.78786	1.20861	2.98606	0.00749805	0.188344	0.133736	9 x 8		9 q21	FERM domain containing 3 [Source:HGNC Symbol;Acc:HGNC:24125]
1284	ENSG00000157933	SKI	0.447261	0.243996	2.9113	0.00750488	0.188344	0.133772	9 x 6		1 p36	SKI proto-oncogene [Source:HGNC Symbol;Acc:HGNC:10896]
1285	ENSG00000204682	CASC10	1.06728	0.646638	2.95523	0.00751954	0.188344	0.133847	29 x 25		10 p12	cancer susceptibility 10 [Source:HGNC Symbol;Acc:HGNC:31448]
1286	ENSG00000178750	STX19	1.4898	0.963897	3.10527	0.00752619	0.188344	0.133882	37 x 18		3 q11	syntaxin 19 [Source:HGNC Symbol;Acc:HGNC:19300]
1287	ENSG00000161647	MPP3	-1.10238	-0.435125	-2.93058	0.00752898	0.188344	0.133896	5 x 27		17 q21	membrane palmitoylated protein 3 [Source:HGNC Symbol;Acc:HGNC:7221]
1288	ENSG00000084764	MAPRE3	-0.952966	-0.390007	-2.91222	0.00753079	0.188344	0.133905	1 x 32		2 p23	microtubule associated protein RP/EB family member 3 [Source:HGNC Symbol;Acc:HGNC:6892]
1289	ENSG00000233246	LOC101929464	0.491973	0.270529	2.95854	0.00754548	0.188344	0.133981	19 x 28		1 p35
1290	ENSG00000205177	C11orf91	0.750477	0.431557	2.97332	0.00754576	0.188344	0.133982	37 x 18		11 p13	chromosome 11 open reading frame 91 [Source:HGNC Symbol;Acc:HGNC:34444]
1291	ENSG00000110218	PANX1	0.620773	0.349136	2.91388	0.00754644	0.188344	0.133986	25 x 9		11 q21	pannexin 1 [Source:HGNC Symbol;Acc:HGNC:8599]
1292	ENSG00000167548	KMT2D	-0.64449	-0.283111	-2.91737	0.00754813	0.188344	0.133994	3 x 7	H	12 q13	lysine methyltransferase 2D [Source:HGNC Symbol;Acc:HGNC:7133]
1293	ENSG00000174992	ZG16	-1.04322	-0.41778	-3.06878	0.00755564	0.188344	0.134033	22 x 34		16 p11	zymogen granule protein 16 [Source:HGNC Symbol;Acc:HGNC:30961]
1294	ENSG00000158887	MPZ	1.59003	1.04426	3.17629	0.00755768	0.188344	0.134043	23 x 25		1 q23	myelin protein zero [Source:HGNC Symbol;Acc:HGNC:7225]
1295	ENSG00000204390	HSPA1L	-0.688071	-0.299336	-2.93636	0.00756064	0.188344	0.134058	8 x 33		6 p21	heat shock protein family A (Hsp70) member 1 like [Source:HGNC Symbol;Acc:HGNC:5234]
1296	ENSG00000213853	EMP2	-1.16025	-0.451432	-2.96123	0.00756715	0.188344	0.134091	12 x 40	K	16 p13	epithelial membrane protein 2 [Source:HGNC Symbol;Acc:HGNC:3334]
1297	ENSG00000054392	HHAT	-0.838881	-0.352631	-2.90794	0.00756736	0.188344	0.134092	2 x 36		1 q32	hedgehog acyltransferase [Source:HGNC Symbol;Acc:HGNC:18270]
1298	ENSG00000181544	FANCB	1.00299	0.60141	2.90956	0.0075892	0.188344	0.134204	38 x 26	A	X p22	Fanconi anemia complementation group B [Source:HGNC Symbol;Acc:HGNC:3583]
1299	ENSG00000162366	PDZK1IP1	2.24928	1.62154	2.90459	0.00758989	0.188344	0.134207	40 x 11	D	1 p33	PDZK1 interacting protein 1 [Source:HGNC Symbol;Acc:HGNC:16887]
1300	ENSG00000278311	GGNBP2	-0.40899	-0.189035	-2.91824	0.00759326	0.188344	0.134224	7 x 14		17 q12	gametogenetin binding protein 2 [Source:HGNC Symbol;Acc:HGNC:19357]
1301	ENSG00000233429		1.16828	0.719321	3.02709	0.00759929	0.188344	0.134255	39 x 16		7 p15	HOXA transcript antisense RNA, myeloid-specific 1 [Source:HGNC Symbol;Acc:HGNC:37117]
1302	ENSG00000228649		1.27534	0.798524	2.97702	0.00761253	0.188344	0.134322	23 x 25		7 p15	small nucleolar RNA host gene 26 [Source:HGNC Symbol;Acc:HGNC:53131]
1303	ENSG00000090097	PCBP4	0.703468	0.401307	2.91679	0.00761926	0.188344	0.134356	32 x 29		3 p21	poly(rC) binding protein 4 [Source:HGNC Symbol;Acc:HGNC:8652]
1304	ENSG00000257829		0.863302	0.505917	2.91731	0.00762015	0.204762	0.134361	21 x 23		12 q13
1305	ENSG00000204963	PCDHA7	-1.00469	-0.406117	-3.05123	0.00764227	0.204762	0.134494	20 x 31		5 q31	protocadherin alpha 7 [Source:HGNC Symbol;Acc:HGNC:8673]
1306	ENSG00000171234	UGT2B7	1.57292	1.03041	3.00872	0.00764606	0.204762	0.134517	40 x 13	D	4 q13	UDP glucuronosyltransferase family 2 member B7 [Source:HGNC Symbol;Acc:HGNC:12554]
1307	ENSG00000180346	TIGD2	0.728587	0.417417	2.90262	0.00766365	0.204762	0.134623	36 x 19		4 q22	tigger transposable element derived 2 [Source:HGNC Symbol;Acc:HGNC:18333]
1308	ENSG00000145545	SRD5A1	0.558945	0.310999	2.92001	0.0076709	0.204762	0.134667	35 x 17		5 p15	steroid 5 alpha-reductase 1 [Source:HGNC Symbol;Acc:HGNC:11284]
1309	ENSG00000231305		0.712634	0.407172	2.8993	0.00770855	0.204762	0.134893	7 x 27	J	3 q21
1310	ENSG00000224945		1.03144	0.621329	3.07569	0.00771836	0.204762	0.134951	13 x 26		9 q22
1311	ENSG00000153721	CNKSR3	1.31301	0.826927	2.90042	0.00773216	0.204762	0.135033	34 x 22	B	6 q25	CNKSR family member 3 [Source:HGNC Symbol;Acc:HGNC:23034]
1312	ENSG00000185915	KLHL34	1.81131	1.2286	3.04809	0.00773372	0.204762	0.135042	22 x 21		X p22	kelch like family member 34 [Source:HGNC Symbol;Acc:HGNC:26634]
1313	ENSG00000280003		0.347714	0.186321	2.89571	0.00774637	0.204762	0.135118	15 x 23		3 p21
1314	ENSG00000227583		0.388452	0.20969	2.89695	0.00776185	0.204762	0.135209	25 x 36		10 q21	ribosomal protein S3a pseudogene 37 [Source:HGNC Symbol;Acc:HGNC:36691]
1315	ENSG00000279369		0.960213	0.571766	2.96865	0.00777529	0.204762	0.135289	32 x 24	B	17 q23
1316	ENSG00000128309	MPST	0.666953	0.378106	2.89461	0.00778619	0.204762	0.135353	33 x 37		22 q12	mercaptopyruvate sulfurtransferase [Source:HGNC Symbol;Acc:HGNC:7223]
1317	ENSG00000230115	TPRG1-AS2	-0.565394	-0.252718	-3.05032	0.00778875	0.204762	0.135368	10 x 35		3 q28	TPRG1 antisense RNA 2 [Source:HGNC Symbol;Acc:HGNC:41062]
1318	ENSG00000143702	CEP170	0.793024	0.459308	2.93339	0.0078021	0.204762	0.135447	30 x 21		1 q43	centrosomal protein 170 [Source:HGNC Symbol;Acc:HGNC:28920]
1319	ENSG00000198822	GRM3	-0.576161	-0.256927	-2.90793	0.0078068	0.204762	0.135474	24 x 31		7 q21	glutamate metabotropic receptor 3 [Source:HGNC Symbol;Acc:HGNC:4595]
1320	ENSG00000090565	RAB11FIP3	-0.806328	-0.341502	-2.89265	0.00781117	0.204762	0.1355	20 x 15		16 p13	RAB11 family interacting protein 3 [Source:HGNC Symbol;Acc:HGNC:17224]
1321	ENSG00000091483	FH	0.732612	0.42001	2.91752	0.00782661	0.204762	0.13559	37 x 32		1 q43	fumarate hydratase [Source:HGNC Symbol;Acc:HGNC:3700]
1322	ENSG00000217275		-1.08659	-0.430561	-2.90003	0.00782997	0.204762	0.13561	40 x 32	A	6 p22
1323	ENSG00000203879	GDI1	-0.65993	-0.288901	-2.89528	0.00785203	0.204762	0.135739	21 x 14		X q28	GDP dissociation inhibitor 1 [Source:HGNC Symbol;Acc:HGNC:4226]
1324	ENSG00000134438	RAX	0.488207	0.268279	2.93547	0.0078525	0.204762	0.135742	31 x 21		18 q21	retina and anterior neural fold homeobox [Source:HGNC Symbol;Acc:HGNC:18662]
1325	ENSG00000159784	FAM131B	-1.44878	-0.523011	-2.89868	0.00785899	0.204762	0.135779	5 x 2		7 q34	family with sequence similarity 131 member B [Source:HGNC Symbol;Acc:HGNC:22202]
1326	ENSG00000006555	TTC22	1.45816	0.93894	2.91573	0.00788206	0.204762	0.135913	39 x 11	D	1 p32	tetratricopeptide repeat domain 22 [Source:HGNC Symbol;Acc:HGNC:26067]
1327	ENSG00000212536		0.356353	0.19125	2.91317	0.00789344	0.204762	0.135979	13 x 20		20 p13	RNA, 5S ribosomal pseudogene 474 [Source:HGNC Symbol;Acc:HGNC:43374]
1328	ENSG00000119844	AFTPH	-0.432884	-0.199072	-2.91969	0.00789599	0.204762	0.135994	1 x 14	I	2 p14	aftiphilin [Source:HGNC Symbol;Acc:HGNC:25951]
1329	ENSG00000121058	COIL	-0.610292	-0.270119	-2.89773	0.00789605	0.204762	0.135994	29 x 17		17 q22	coilin [Source:HGNC Symbol;Acc:HGNC:2184]
1330	ENSG00000241770		0.4705	0.257738	2.91481	0.00790039	0.204762	0.13602	15 x 14		3 q25
1331	ENSG00000179218	CALR	0.662512	0.375302	2.91755	0.00790895	0.204762	0.136069	35 x 30		19 p13	calreticulin [Source:HGNC Symbol;Acc:HGNC:1455]
1332	ENSG00000165359	INTS6L	1.02638	0.617776	2.88807	0.0079152	0.204762	0.136105	11 x 6		X q26	integrator complex subunit 6 like [Source:HGNC Symbol;Acc:HGNC:27334]
1333	ENSG00000204175	GPRIN2	1.68056	1.11852	2.90027	0.00796563	0.204762	0.136395	31 x 25	B	10 q11	G protein regulated inducer of neurite outgrowth 2 [Source:HGNC Symbol;Acc:HGNC:23730]
1334	ENSG00000261613		-0.999735	-0.404597	-2.91022	0.00797669	0.204762	0.136458	15 x 31		16 p13
1335	ENSG00000213089		0.658199	0.372583	2.94385	0.00797964	0.204762	0.136475	18 x 24		6 q25	phosducin-like 3 pseudogene 5 [Source:HGNC Symbol;Acc:HGNC:44506]
1336	ENSG00000171940	ZNF217	-0.942641	-0.386729	-2.97907	0.00799107	0.204762	0.13654	1 x 10	I	20 q13	zinc finger protein 217 [Source:HGNC Symbol;Acc:HGNC:13009]
1337	ENSG00000132677	RHBG	-1.48658	-0.531187	-2.91108	0.00799363	0.204762	0.136554	29 x 29		1 q22	Rh family B glycoprotein (gene/pseudogene) [Source:HGNC Symbol;Acc:HGNC:14572]
1338	ENSG00000197893	NRAP	0.776401	0.448424	2.91097	0.00799896	0.204762	0.136585	22 x 30		10 q25	nebulin related anchoring protein [Source:HGNC Symbol;Acc:HGNC:7988]
1339	ENSG00000113262	GRM6	0.933338	0.553321	3.04696	0.00800189	0.204762	0.136601	24 x 24		5 q35	glutamate metabotropic receptor 6 [Source:HGNC Symbol;Acc:HGNC:4598]
1340	ENSG00000136114	THSD1	-0.776416	-0.331094	-2.8818	0.00800665	0.204762	0.136628	17 x 4		13 q14	thrombospondin type 1 domain containing 1 [Source:HGNC Symbol;Acc:HGNC:17754]
1341	ENSG00000112079	STK38	0.474534	0.260134	2.88195	0.00801584	0.204762	0.13668	27 x 19		6 p21	serine/threonine kinase 38 [Source:HGNC Symbol;Acc:HGNC:17847]
1342	ENSG00000270001		-0.503457	-0.228069	-2.89798	0.00802061	0.204762	0.136707	12 x 33		20 p11
1343	ENSG00000182240	BACE2	0.873985	0.513086	2.88462	0.00802101	0.204762	0.13671	39 x 12	D	21 q22	beta-site APP-cleaving enzyme 2 [Source:HGNC Symbol;Acc:HGNC:934]
1344	ENSG00000132763	MMACHC	0.7205	0.412217	2.9025	0.00803558	0.204762	0.136792	33 x 33		1 p34	methylmalonic aciduria (cobalamin deficiency) cblC type, with homocystinuria [Source:HGNC Symbol;Acc:HGNC:24525]
1345	ENSG00000260679		-0.517841	-0.233859	-2.92383	0.00804159	0.204762	0.136826	16 x 9		11 q13
1346	ENSG00000104237	RP1	-1.1262	-0.441917	-2.88126	0.00804288	0.204762	0.136833	3 x 38		8 q11	RP1, axonemal microtubule associated [Source:HGNC Symbol;Acc:HGNC:10263]
1347	ENSG00000174059	CD34	-0.808122	-0.342121	-2.89348	0.00804454	0.204762	0.136843	16 x 5		1 q32	CD34 molecule [Source:HGNC Symbol;Acc:HGNC:1662]
1348	ENSG00000246526	LINC002481	-0.673648	-0.294007	-2.90158	0.00804909	0.204762	0.136868	32 x 9		4 p16	long intergenic non-protein coding RNA 2481 [Source:HGNC Symbol;Acc:HGNC:27958]
1349	ENSG00000163705	FANCD2OS	0.48558	0.266711	2.9011	0.00806982	0.204762	0.136985	16 x 26		3 p25	FANCD2 opposite strand [Source:HGNC Symbol;Acc:HGNC:28623]
1350	ENSG00000137571	SLCO5A1	1.76755	1.19138	3.04399	0.00809193	0.204762	0.137109	33 x 23	B	8 q13	solute carrier organic anion transporter family member 5A1 [Source:HGNC Symbol;Acc:HGNC:19046]
1351	ENSG00000231086		0.41017	0.222281	2.87665	0.0081087	0.204762	0.137203	18 x 30		22 q11	testis specific serine kinase 1A, pseudogene [Source:HGNC Symbol;Acc:HGNC:11400]
1352	ENSG00000267522	LINC01864	-0.345177	-0.161684	-2.89205	0.00811706	0.204762	0.137249	15 x 15		19 q13	long intergenic non-protein coding RNA 1864 [Source:HGNC Symbol;Acc:HGNC:52683]
1353	ENSG00000205334	LINC01460	1.03477	0.62367	3.09624	0.00813021	0.204762	0.137323	20 x 24		2 p23	long intergenic non-protein coding RNA 1460 [Source:HGNC Symbol;Acc:HGNC:50858]
1354	ENSG00000266278	LINC01910	1.14181	0.700081	3.05846	0.00813413	0.204762	0.137344	37 x 18		18 q22	long intergenic non-protein coding RNA 1910 [Source:HGNC Symbol;Acc:HGNC:52729]
1355	ENSG00000256234		1.26597	0.791506	3.02087	0.00813722	0.204762	0.137362	37 x 13		12 p11
1356	ENSG00000152078	TMEM56	1.25058	0.78001	2.93825	0.00814718	0.204762	0.137417	30 x 16		1 p21	transmembrane protein 56 [Source:HGNC Symbol;Acc:HGNC:26477]
1357	ENSG00000122694	GLIPR2	1.1202	0.684471	2.88534	0.00815499	0.204762	0.13746	37 x 9		9 p13	GLI pathogenesis related 2 [Source:HGNC Symbol;Acc:HGNC:18007]
1358	ENSG00000197415	VEPH1	1.28747	0.807637	2.95635	0.00815855	0.204762	0.13748	32 x 22	B	3 q25	ventricular zone expressed PH domain containing 1 [Source:HGNC Symbol;Acc:HGNC:25735]
1359	ENSG00000240024	LINC00888	0.792365	0.458875	2.88016	0.00817489	0.204762	0.13757	32 x 26	B	3 q27	long intergenic non-protein coding RNA 888 [Source:HGNC Symbol;Acc:HGNC:48575]
1360	ENSG00000237292	LINC01732	-0.4163	-0.192117	-3.03278	0.00817728	0.204762	0.137584	19 x 31		1 q25	long intergenic non-protein coding RNA 1732 [Source:HGNC Symbol;Acc:HGNC:52520]
1361	ENSG00000263300		-0.283707	-0.134588	-2.88296	0.00818404	0.204762	0.137621	11 x 16		17 p13
1362	ENSG00000273338		0.561891	0.312799	2.88397	0.00818922	0.204762	0.137649	16 x 28		1 p31
1363	ENSG00000125611	CHCHD5	-0.797954	-0.338606	-2.87466	0.00821049	0.204762	0.137766	38 x 40		2 q14	coiled-coil-helix-coiled-coil-helix domain containing 5 [Source:HGNC Symbol;Acc:HGNC:17840]
1364	ENSG00000197818	SLC9A8	-0.574512	-0.256284	-2.87716	0.00822057	0.204762	0.137822	24 x 14		20 q13	solute carrier family 9 member A8 [Source:HGNC Symbol;Acc:HGNC:20728]
1365	ENSG00000121579	NAA50	0.531253	0.294159	2.87333	0.0082447	0.204762	0.137954	29 x 16		3 q13	N(alpha)-acetyltransferase 50, NatE catalytic subunit [Source:HGNC Symbol;Acc:HGNC:29533]
1366	ENSG00000165480	SKA3	1.22429	0.760482	2.89426	0.00825888	0.204762	0.138031	40 x 26	A	13 q12	spindle and kinetochore associated complex subunit 3 [Source:HGNC Symbol;Acc:HGNC:20262]
1367	ENSG00000107104	KANK1	1.04611	0.631659	2.86945	0.00826445	0.204762	0.138061	8 x 9		9 p24	KN motif and ankyrin repeat domains 1 [Source:HGNC Symbol;Acc:HGNC:19309]
1368	ENSG00000279903		-0.376369	-0.175152	-2.92165	0.00826744	0.204762	0.138078	13 x 35		8 p22
1369	ENSG00000112137	PHACTR1	0.907877	0.535977	2.87732	0.00829438	0.204762	0.138224	9 x 7		6 p24	phosphatase and actin regulator 1 [Source:HGNC Symbol;Acc:HGNC:20990]
1370	ENSG00000065978	YBX1	0.803304	0.466066	2.86885	0.00830086	0.204762	0.138259	36 x 30		1 p34	Y-box binding protein 1 [Source:HGNC Symbol;Acc:HGNC:8014]
1371	ENSG00000170369	CST2	-1.6345	-0.560512	-2.91022	0.0083081	0.204762	0.138298	7 x 40	K	20 p11	cystatin SA [Source:HGNC Symbol;Acc:HGNC:2474]
1372	ENSG00000197093	GAL3ST4	1.02363	0.615848	2.87444	0.00831017	0.204762	0.138309	32 x 1	F	7 q22	galactose-3-O-sulfotransferase 4 [Source:HGNC Symbol;Acc:HGNC:24145]
1373	ENSG00000243156	MICAL3	0.869164	0.509848	2.86612	0.00831261	0.204762	0.138322	8 x 8		22 q11	microtubule associated monooxygenase, calponin and LIM domain containing 3 [Source:HGNC Symbol;Acc:HGNC:24694]
1374	ENSG00000228084		-0.719718	-0.310887	-2.86623	0.00832155	0.204762	0.138371	17 x 39		1 p21
1375	ENSG00000231167		0.569115	0.317221	2.8665	0.00833532	0.204762	0.138445	35 x 30		7 q22	Y-box binding protein 1 pseudogene 2 [Source:HGNC Symbol;Acc:HGNC:22635]
1376	ENSG00000242411		0.450681	0.246012	2.86584	0.00833686	0.204762	0.138453	29 x 38		19 q13
1377	ENSG00000105767	CADM4	0.823193	0.479198	2.89874	0.00833917	0.204762	0.138465	18 x 11		19 q13	cell adhesion molecule 4 [Source:HGNC Symbol;Acc:HGNC:30825]
1378	ENSG00000135269	TES	0.870119	0.510489	2.86788	0.00834557	0.204762	0.1385	34 x 19		7 q31	testin LIM domain protein [Source:HGNC Symbol;Acc:HGNC:14620]
1379	ENSG00000067113	PLPP1	-0.781281	-0.332798	-2.88488	0.00837989	0.204762	0.138684	16 x 4		5 q11	phospholipid phosphatase 1 [Source:HGNC Symbol;Acc:HGNC:9228]
1380	ENSG00000077150	NFKB2	0.657163	0.37193	2.92998	0.00838125	0.204762	0.138691	36 x 10		10 q24	nuclear factor kappa B subunit 2 [Source:HGNC Symbol;Acc:HGNC:7795]
1381	ENSG00000239948		0.395605	0.213827	2.86982	0.00838582	0.204762	0.138715	13 x 21		19 q13	RNA, 7SL, cytoplasmic 368, pseudogene [Source:HGNC Symbol;Acc:HGNC:46384]
1382	ENSG00000073350	LLGL2	-0.95391	-0.390306	-2.86187	0.00839319	0.204762	0.138755	22 x 15		17 q25	LLGL2, scribble cell polarity complex component [Source:HGNC Symbol;Acc:HGNC:6629]
1383	ENSG00000259623		-0.639847	-0.28136	-2.89967	0.00839503	0.204762	0.138764	5 x 35		17 q21
1384	ENSG00000279072		0.384257	0.207269	2.87111	0.00839817	0.204762	0.138781	16 x 20		7 p11
1385	ENSG00000270419	CAHM	0.575639	0.321223	2.86608	0.00840317	0.204762	0.138808	18 x 26		6 q26	colon adenocarcinoma hypermethylated (non-protein coding) [Source:HGNC Symbol;Acc:HGNC:42860]
1386	ENSG00000063127	SLC6A16	1.09135	0.663779	2.90956	0.00840424	0.204762	0.138813	16 x 24		19 q13	solute carrier family 6 member 16 [Source:HGNC Symbol;Acc:HGNC:13622]
1387	ENSG00000133111	RFXAP	0.653829	0.369831	2.87389	0.00842866	0.204762	0.138943	32 x 19		13 q13	regulatory factor X associated protein [Source:HGNC Symbol;Acc:HGNC:9988]
1388	ENSG00000176909	MAMSTR	-0.719174	-0.31069	-2.86754	0.00843463	0.204762	0.138975	31 x 30		19 q13	MEF2 activating motif and SAP domain containing transcriptional regulator [Source:HGNC Symbol;Acc:HGNC:26689]
1389	ENSG00000185433	LINC00158	0.365905	0.196716	2.86064	0.00843565	0.204762	0.13898	33 x 9		21 q21	long intergenic non-protein coding RNA 158 [Source:HGNC Symbol;Acc:HGNC:1283]
1390	ENSG00000211454	AKR7L	-1.00689	-0.406793	-2.86008	0.008451	0.204762	0.139061	5 x 28		1 p36	aldo-keto reductase family 7 like (gene/pseudogene) [Source:HGNC Symbol;Acc:HGNC:24056]
1391	ENSG00000124831	LRRFIP1	-0.489069	-0.222235	-2.9627	0.0084622	0.204762	0.13912	2 x 13	I	2 q37	LRR binding FLII interacting protein 1 [Source:HGNC Symbol;Acc:HGNC:6702]
1392	ENSG00000102316	MAGED2	-1.14372	-0.44684	-2.87408	0.00847028	0.204762	0.139163	4 x 36		X p11	MAGE family member D2 [Source:HGNC Symbol;Acc:HGNC:16353]
1393	ENSG00000100297	MCM5	0.876031	0.514461	2.86086	0.00847381	0.204762	0.139181	38 x 28	A	22 q12	minichromosome maintenance complex component 5 [Source:HGNC Symbol;Acc:HGNC:6948]
1394	ENSG00000198924	DCLRE1A	0.605195	0.339457	2.85636	0.00850666	0.204762	0.139354	28 x 18		10 q25	DNA cross-link repair 1A [Source:HGNC Symbol;Acc:HGNC:17660]
1395	ENSG00000152086	TUBA3E	-1.12552	-0.441723	-2.9698	0.00850868	0.204762	0.139364	6 x 39	K	2 q21	tubulin alpha 3e [Source:HGNC Symbol;Acc:HGNC:20765]
1396	ENSG00000187764	SEMA4D	0.494517	0.27205	2.93204	0.00851689	0.204762	0.139407	32 x 9		9 q22	semaphorin 4D [Source:HGNC Symbol;Acc:HGNC:10732]
1397	ENSG00000058262	SEC61A1	0.457626	0.250112	2.95647	0.00851786	0.204762	0.139412	24 x 12		3 q21	Sec61 translocon alpha 1 subunit [Source:HGNC Symbol;Acc:HGNC:18276]
1398	ENSG00000007402	CACNA2D2	-1.84824	-0.59536	-2.85536	0.00852586	0.204762	0.139454	1 x 36		3 p21	calcium voltage-gated channel auxiliary subunit alpha2delta 2 [Source:HGNC Symbol;Acc:HGNC:1400]
1399	ENSG00000067955	CBFB	0.567052	0.315957	2.85554	0.00852693	0.204762	0.13946	32 x 17		16 q22	core-binding factor beta subunit [Source:HGNC Symbol;Acc:HGNC:1539]
1400	ENSG00000147642	SYBU	-1.79493	-0.5875	-2.85405	0.00856664	0.204762	0.139666	9 x 40	K	8 q23	syntabulin [Source:HGNC Symbol;Acc:HGNC:26011]
1401	ENSG00000023902	PLEKHO1	0.626059	0.352431	2.85503	0.00857357	0.204762	0.139702	34 x 6		1 q21	pleckstrin homology domain containing O1 [Source:HGNC Symbol;Acc:HGNC:24310]
1402	ENSG00000273893		-0.70284	-0.304751	-2.8637	0.00859482	0.204762	0.139812	14 x 31		20 q13
1403	ENSG00000143641	GALNT2	0.635053	0.35805	2.87337	0.00859961	0.204762	0.139837	23 x 20		1 q42	polypeptide N-acetylgalactosaminyltransferase 2 [Source:HGNC Symbol;Acc:HGNC:4124]
1404	ENSG00000267986		0.382863	0.206465	2.85884	0.00860188	0.204762	0.139848	14 x 21		19 p13
1405	ENSG00000275894		-0.601574	-0.266771	-2.85086	0.00861449	0.204762	0.139913	11 x 22		20 q13
1406	ENSG00000198846	TOX	1.24707	0.777393	2.86562	0.00862249	0.204762	0.139954	33 x 23	B	8 q12	thymocyte selection associated high mobility group box [Source:HGNC Symbol;Acc:HGNC:18988]
1407	ENSG00000227560		0.587793	0.3287	2.99268	0.00863061	0.204762	0.139996	15 x 25		10 q25	ribosomal protein S15a pseudogene 30 [Source:HGNC Symbol;Acc:HGNC:35495]
1408	ENSG00000138152	BTBD16	0.459154	0.251015	2.8968	0.00863776	0.204762	0.140033	20 x 26		10 q26	BTB domain containing 16 [Source:HGNC Symbol;Acc:HGNC:26340]
1409	ENSG00000198885	ITPRIPL1	0.90607	0.534752	2.8552	0.00863952	0.204762	0.140042	14 x 6		2 q11	inositol 1,4,5-trisphosphate receptor interacting protein-like 1 [Source:HGNC Symbol;Acc:HGNC:29371]
1410	ENSG00000229989		0.430497	0.234148	2.93528	0.00864661	0.204762	0.140078	13 x 15		1 q32	MIR181A1 host gene [Source:HGNC Symbol;Acc:HGNC:48659]
1411	ENSG00000229107		0.700687	0.399531	3.05779	0.00867946	0.204762	0.140246	27 x 33		22 q11	abhydrolase domain containing 17A pseudogene P4 [Source:HGNC Symbol;Acc:HGNC:34042]
1412	ENSG00000229891	LINC01315	1.7848	1.206	2.87396	0.00869543	0.204762	0.140327	33 x 38		22 q13	long intergenic non-protein coding RNA 1315 [Source:HGNC Symbol;Acc:HGNC:50513]
1413	ENSG00000259345		-1.13565	-0.444581	-2.86084	0.00869688	0.204762	0.140334	1 x 19		15 q14
1414	ENSG00000255857		-0.58219	-0.259274	-2.88484	0.00870554	0.204762	0.140378	29 x 34		12 q24	PXN antisense RNA 1 [Source:HGNC Symbol;Acc:HGNC:44123]
1415	ENSG00000176927	EFCAB5	0.503712	0.27756	2.85655	0.00870826	0.204762	0.140392	17 x 31		17 q11	EF-hand calcium binding domain 5 [Source:HGNC Symbol;Acc:HGNC:24801]
1416	ENSG00000115355	CCDC88A	0.880387	0.517393	2.87513	0.00871954	0.204762	0.140449	32 x 22	B	2 p16	coiled-coil domain containing 88A [Source:HGNC Symbol;Acc:HGNC:25523]
1417	ENSG00000168389	MFSD2A	1.1237	0.686993	2.87274	0.00873668	0.204762	0.140536	40 x 20	C	1 p34	major facilitator superfamily domain containing 2A [Source:HGNC Symbol;Acc:HGNC:25897]
1418	ENSG00000118160	SLC8A2	-1.35294	-0.501031	-2.91161	0.00874313	0.204762	0.140568	23 x 14		19 q13	solute carrier family 8 member A2 [Source:HGNC Symbol;Acc:HGNC:11069]
1419	ENSG00000231970		0.369991	0.19906	2.84507	0.00875209	0.204762	0.140613	14 x 25		10 q24
1420	ENSG00000172716	SLFN11	0.73187	0.419533	2.86313	0.00877565	0.204762	0.140732	30 x 4		17 q12	schlafen family member 11 [Source:HGNC Symbol;Acc:HGNC:26633]
1421	ENSG00000225528		0.37038	0.199283	2.84449	0.00877824	0.204762	0.140745	28 x 36		22 q13
1422	ENSG00000115705	TPO	-0.997101	-0.403787	-2.84592	0.00877963	0.204762	0.140752	3 x 4	H	2 p25	thyroid peroxidase [Source:HGNC Symbol;Acc:HGNC:12015]
1423	ENSG00000213923	CSNK1E	0.536749	0.297489	2.84304	0.00879153	0.204762	0.140811	19 x 18		22 q13	casein kinase 1 epsilon [Source:HGNC Symbol;Acc:HGNC:2453]
1424	ENSG00000134107	BHLHE40	-1.16171	-0.451835	-2.8428	0.00881131	0.204762	0.14091	12 x 40	K	3 p26	basic helix-loop-helix family member e40 [Source:HGNC Symbol;Acc:HGNC:1046]
1425	ENSG00000158528	PPP1R9A	1.00172	0.600526	2.88034	0.00881845	0.204762	0.140946	3 x 20		7 q21	protein phosphatase 1 regulatory subunit 9A [Source:HGNC Symbol;Acc:HGNC:14946]
1426	ENSG00000122203	KIAA1191	-0.506919	-0.229466	-2.84192	0.00882407	0.204762	0.140974	19 x 38		5 q35	KIAA1191 [Source:HGNC Symbol;Acc:HGNC:29209]
1427	ENSG00000265996	MIR3671	-0.417942	-0.192808	-2.8409	0.0088266	0.204762	0.140986	11 x 22		1 p31	microRNA 3671 [Source:HGNC Symbol;Acc:HGNC:38925]
1428	ENSG00000184786	TCTE3	0.630207	0.35502	2.84901	0.00882961	0.204762	0.141001	10 x 28		6 q27	t-complex-associated-testis-expressed 3 [Source:HGNC Symbol;Acc:HGNC:11695]
1429	ENSG00000275812		-0.75643	-0.324043	-2.93967	0.00883236	0.204762	0.141015	18 x 16		20 q13
1430	ENSG00000120162	MOB3B	1.09893	0.669201	2.86169	0.00883395	0.204762	0.141023	10 x 6		9 p21	MOB kinase activator 3B [Source:HGNC Symbol;Acc:HGNC:23825]
1431	ENSG00000134297	PLEKHA8P1	0.532549	0.294944	2.84154	0.00884125	0.204762	0.141059	33 x 20		12 q12	pleckstrin homology domain containing A8 pseudogene 1 [Source:HGNC Symbol;Acc:HGNC:30222]
1432	ENSG00000262903		0.700626	0.399492	2.8415	0.00884244	0.204762	0.141065	8 x 26	J	17 p13
1433	ENSG00000267480		0.942749	0.559765	2.83977	0.00884739	0.204762	0.141089	37 x 22	C	18 p11
1434	ENSG00000155329	ZCCHC10	-0.437507	-0.201001	-2.89514	0.00886896	0.204762	0.141196	20 x 39		5 q31	zinc finger CCHC-type containing 10 [Source:HGNC Symbol;Acc:HGNC:25954]
1435	ENSG00000069188	SDK2	-1.71556	-0.574774	-2.84577	0.00887407	0.204762	0.141221	28 x 26		17 q25	sidekick cell adhesion molecule 2 [Source:HGNC Symbol;Acc:HGNC:19308]
1436	ENSG00000183527	PSMG1	0.797703	0.462381	2.85001	0.0088899	0.204762	0.1413	37 x 31		21 q22	proteasome assembly chaperone 1 [Source:HGNC Symbol;Acc:HGNC:3043]
1437	ENSG00000140379	BCL2A1	2.04144	1.43041	2.95525	0.00889309	0.204762	0.141315	36 x 1	F	15 q25	BCL2 related protein A1 [Source:HGNC Symbol;Acc:HGNC:991]
1438	ENSG00000163558	PRKCI	0.510411	0.281584	2.85632	0.00889475	0.204762	0.141323	29 x 13		3 q26	protein kinase C iota [Source:HGNC Symbol;Acc:HGNC:9404]
1439	ENSG00000241186	TDGF1	0.8651	0.507122	2.94147	0.00890236	0.204762	0.141361	23 x 25		3 p21	teratocarcinoma-derived growth factor 1 [Source:HGNC Symbol;Acc:HGNC:11701]
1440	ENSG00000224020		0.714136	0.408134	2.93352	0.00890683	0.204762	0.141383	20 x 27		9 q33	MIR181A2 host gene [Source:HGNC Symbol;Acc:HGNC:37188]
1441	ENSG00000245146		-0.750423	-0.321908	-2.84122	0.00890879	0.204762	0.141393	9 x 33		5 q31	long intergenic non-protein coding RNA 1024 [Source:HGNC Symbol;Acc:HGNC:49009]
1442	ENSG00000198912	C1orf174	0.505925	0.278888	2.83701	0.00891953	0.204762	0.141445	33 x 17		1 p36	chromosome 1 open reading frame 174 [Source:HGNC Symbol;Acc:HGNC:27915]
1443	ENSG00000109321	AREG	-2.57996	-0.647332	-2.84806	0.00892889	0.204762	0.141491	13 x 39		4 q13	amphiregulin [Source:HGNC Symbol;Acc:HGNC:651]
1444	ENSG00000259031		0.433414	0.235858	2.84707	0.00893664	0.204762	0.141529	17 x 20		14 q32
1445	ENSG00000162714	ZNF496	0.634087	0.357446	2.83732	0.00893896	0.204762	0.14154	25 x 22		1 q44	zinc finger protein 496 [Source:HGNC Symbol;Acc:HGNC:23713]
1446	ENSG00000196466	ZNF799	-0.405777	-0.187676	-2.83756	0.00894618	0.204762	0.141576	10 x 36		19 p13	zinc finger protein 799 [Source:HGNC Symbol;Acc:HGNC:28071]
1447	ENSG00000168280	KIF5C	-1.76681	-0.583132	-2.85614	0.00896756	0.204762	0.14168	1 x 36		2 q23	kinesin family member 5C [Source:HGNC Symbol;Acc:HGNC:6325]
1448	ENSG00000196632	WNK3	1.34581	0.851882	2.83394	0.00898735	0.204762	0.141776	29 x 23		X p11	WNK lysine deficient protein kinase 3 [Source:HGNC Symbol;Acc:HGNC:14543]
1449	ENSG00000259840		-0.522676	-0.235797	-2.83444	0.00903254	0.204762	0.141995	6 x 30		16 p13
1450	ENSG00000232564	LOC101927257	0.382595	0.20631	2.85154	0.00904554	0.204762	0.142057	13 x 22		22 q13
1451	ENSG00000054967	RELT	0.628641	0.354043	2.8319	0.00906968	0.204762	0.142173	32 x 7		11 q13	RELT, TNF receptor [Source:HGNC Symbol;Acc:HGNC:13764]
1452	ENSG00000106392	C1GALT1	0.890597	0.524278	2.88364	0.00908529	0.204762	0.142248	35 x 18		7 p22	core 1 synthase, glycoprotein-N-acetylgalactosamine 3-beta-galactosyltransferase 1 [Source:HGNC Symbol;Acc:HGNC:24337]
1453	ENSG00000265702	LOC105371855	-0.755339	-0.323655	-2.83056	0.0090944	0.204762	0.142291	21 x 34		17 q23
1454	ENSG00000119280	C1orf198	0.766208	0.441777	2.8406	0.00911039	0.204762	0.142367	30 x 22		1 q42	chromosome 1 open reading frame 198 [Source:HGNC Symbol;Acc:HGNC:25900]
1455	ENSG00000216306	KRT19P2	-0.368716	-0.171865	-2.84014	0.00913976	0.204762	0.142507	23 x 35		12 q22	keratin 19 pseudogene 2 [Source:HGNC Symbol;Acc:HGNC:33423]
1456	ENSG00000270533		-0.706913	-0.306237	-2.89022	0.00914367	0.204762	0.142526	21 x 35		21 p11
1457	ENSG00000172057	ORMDL3	-0.920773	-0.379717	-2.82549	0.00915146	0.204762	0.142562	24 x 33		17 q21	ORMDL sphingolipid biosynthesis regulator 3 [Source:HGNC Symbol;Acc:HGNC:16038]
1458	ENSG00000276727		0.302046	0.160507	2.85883	0.00915472	0.204762	0.142578	21 x 31		12 q13
1459	ENSG00000132746	ALDH3B2	-1.64852	-0.56307	-2.88728	0.00916106	0.204762	0.142608	11 x 40	K	11 q13	aldehyde dehydrogenase 3 family member B2 [Source:HGNC Symbol;Acc:HGNC:411]
1460	ENSG00000007392	LUC7L	-0.528495	-0.238123	-2.87635	0.00916625	0.204762	0.142632	8 x 28		16 p13	LUC7 like [Source:HGNC Symbol;Acc:HGNC:6723]
1461	ENSG00000183486	MX2	0.98022	0.585588	2.82853	0.00917558	0.204762	0.142676	40 x 7	E	21 q22	MX dynamin like GTPase 2 [Source:HGNC Symbol;Acc:HGNC:7533]
1462	ENSG00000089234	BRAP	-0.351512	-0.164435	-2.82449	0.00918558	0.204762	0.142723	27 x 17		12 q24	BRCA1 associated protein [Source:HGNC Symbol;Acc:HGNC:1099]
1463	ENSG00000113597	TRAPPC13	-0.412325	-0.190442	-2.82429	0.00918605	0.204762	0.142726	1 x 16	I	5 q12	trafficking protein particle complex 13 [Source:HGNC Symbol;Acc:HGNC:25828]
1464	ENSG00000168792	ABHD15	-0.790881	-0.336149	-2.82629	0.00919827	0.204762	0.142783	23 x 12		17 q11	abhydrolase domain containing 15 [Source:HGNC Symbol;Acc:HGNC:26971]
1465	ENSG00000106683	LIMK1	0.630155	0.354988	2.85122	0.00920319	0.204762	0.142806	21 x 10		7 q11	LIM domain kinase 1 [Source:HGNC Symbol;Acc:HGNC:6613]
1466	ENSG00000108733	PEX12	-0.689251	-0.29977	-2.82497	0.00922886	0.204762	0.142927	1 x 17		17 q12	peroxisomal biogenesis factor 12 [Source:HGNC Symbol;Acc:HGNC:8854]
1467	ENSG00000101280	ANGPT4	-0.594442	-0.264021	-2.91715	0.00923431	0.204762	0.142952	13 x 1		20 p13	angiopoietin 4 [Source:HGNC Symbol;Acc:HGNC:487]
1468	ENSG00000213075	RPL31P11	-0.351199	-0.164299	-2.82121	0.00923869	0.204762	0.142973	27 x 38		1 q23	ribosomal protein L31 pseudogene 11 [Source:HGNC Symbol;Acc:HGNC:35849]
1469	ENSG00000154553	PDLIM3	1.29622	0.814236	2.82173	0.00923889	0.204762	0.142973	26 x 1	G	4 q35	PDZ and LIM domain 3 [Source:HGNC Symbol;Acc:HGNC:20767]
1470	ENSG00000279375		0.647765	0.366018	2.82187	0.00924364	0.204762	0.142996	8 x 6		5 q31
1471	ENSG00000254593		0.526398	0.291222	2.82091	0.00924858	0.204762	0.143019	15 x 25		11 q13	olfactory receptor family 7 subfamily E member 126 pseudogene [Source:HGNC Symbol;Acc:HGNC:15304]
1472	ENSG00000065371	ROPN1	2.70948	2.07466	2.82089	0.00924936	0.204762	0.143022	22 x 24		3 q21	rhophilin associated tail protein 1 [Source:HGNC Symbol;Acc:HGNC:17692]
1473	ENSG00000006128	TAC1	-0.985269	-0.400129	-2.82309	0.00925402	0.204762	0.143044	15 x 6		7 q21	tachykinin precursor 1 [Source:HGNC Symbol;Acc:HGNC:11517]
1474	ENSG00000139211	AMIGO2	-1.67103	-0.567098	-2.82106	0.00927183	0.204762	0.143127	2 x 2	H	12 q13	adhesion molecule with Ig like domain 2 [Source:HGNC Symbol;Acc:HGNC:24073]
1475	ENSG00000255750		1.31323	0.827091	3.0199	0.00927518	0.204762	0.143142	39 x 11	D	12 p11
1476	ENSG00000125166	GOT2	-0.527882	-0.237878	-2.83075	0.00927648	0.204762	0.143148	27 x 15		16 q21	glutamic-oxaloacetic transaminase 2 [Source:HGNC Symbol;Acc:HGNC:4433]
1477	ENSG00000156427	FGF18	-0.850707	-0.356624	-2.82953	0.0092946	0.204762	0.143233	7 x 1		5 q35	fibroblast growth factor 18 [Source:HGNC Symbol;Acc:HGNC:3674]
1478	ENSG00000231903		0.409281	0.221764	2.8439	0.00929815	0.204762	0.143249	35 x 30		2 q33
1479	ENSG00000169083	AR	-2.07694	-0.6228	-2.83417	0.00930023	0.204762	0.143259	6 x 40	K	X q12	androgen receptor [Source:HGNC Symbol;Acc:HGNC:644]
1480	ENSG00000257660	LOC100506125	-0.50311	-0.227928	-2.81967	0.00931018	0.204762	0.143305	31 x 34		12 q13
1481	ENSG00000232117		0.368837	0.198398	2.85553	0.00931484	0.204762	0.143326	15 x 12		13 q12	long intergenic non-protein coding RNA 384 [Source:HGNC Symbol;Acc:HGNC:42711]
1482	ENSG00000248256	OCIAD1-AS1	0.333783	0.178403	2.82152	0.00932825	0.204762	0.143388	11 x 31		4 p11	OCIAD1 antisense RNA 1 [Source:HGNC Symbol;Acc:HGNC:40751]
1483	ENSG00000175766	EIF4E1B	-0.634134	-0.279201	-2.92558	0.00933112	0.204762	0.143401	14 x 40		5 q35	eukaryotic translation initiation factor 4E family member 1B [Source:HGNC Symbol;Acc:HGNC:33179]
1484	ENSG00000246898		0.791292	0.458171	2.81704	0.00933868	0.204762	0.143436	29 x 4		16 q21	long intergenic non-protein coding RNA 920 [Source:HGNC Symbol;Acc:HGNC:48611]
1485	ENSG00000163040	CCDC74A	-1.80553	-0.589108	-2.90709	0.0093394	0.204762	0.143439	1 x 38		2 q21	coiled-coil domain containing 74A [Source:HGNC Symbol;Acc:HGNC:25197]
1486	ENSG00000109501	WFS1	-0.964954	-0.393787	-2.8282	0.00934473	0.204762	0.143464	1 x 4	H	4 p16	wolframin ER transmembrane glycoprotein [Source:HGNC Symbol;Acc:HGNC:12762]
1487	ENSG00000104774	MAN2B1	0.662635	0.37538	2.82377	0.00936042	0.204762	0.143536	22 x 20		19 p13	mannosidase alpha class 2B member 1 [Source:HGNC Symbol;Acc:HGNC:6826]
1488	ENSG00000124217	MOCS3	-0.600968	-0.266538	-2.8178	0.00936087	0.204762	0.143538	27 x 16		20 q13	molybdenum cofactor synthesis 3 [Source:HGNC Symbol;Acc:HGNC:15765]
1489	ENSG00000153944	MSI2	-0.701356	-0.304209	-2.81543	0.00936509	0.204762	0.143557	4 x 36		17 q22	musashi RNA binding protein 2 [Source:HGNC Symbol;Acc:HGNC:18585]
1490	ENSG00000159307	SCUBE1	-2.04868	-0.619961	-2.8474	0.0093711	0.204762	0.143585	1 x 36		22 q13	signal peptide, CUB domain and EGF like domain containing 1 [Source:HGNC Symbol;Acc:HGNC:13441]
1491	ENSG00000164742	ADCY1	-1.7507	-0.580561	-2.82741	0.00938126	0.204762	0.143631	1 x 1		7 p12	adenylate cyclase 1 [Source:HGNC Symbol;Acc:HGNC:232]
1492	ENSG00000105173	CCNE1	1.34772	0.85334	2.8535	0.00938676	0.204762	0.143656	40 x 25	A	19 q12	cyclin E1 [Source:HGNC Symbol;Acc:HGNC:1589]
1493	ENSG00000094755	GABRP	2.85344	2.22487	2.8141	0.00940625	0.204762	0.143745	40 x 11	D	5 q35	gamma-aminobutyric acid type A receptor pi subunit [Source:HGNC Symbol;Acc:HGNC:4089]
1494	ENSG00000181929	PRKAG1	-0.540186	-0.242776	-2.81484	0.00940684	0.204762	0.143748	20 x 39		12 q13	protein kinase AMP-activated non-catalytic subunit gamma 1 [Source:HGNC Symbol;Acc:HGNC:9385]
1495	ENSG00000273680		-0.568376	-0.253886	-2.81371	0.00941872	0.204762	0.143802	14 x 33		12 p11
1496	ENSG00000159712		0.411219	0.222892	2.81775	0.00942891	0.204762	0.143848	19 x 27		9 q22	ankyrin repeat domain 18C, pseudogene [Source:HGNC Symbol;Acc:HGNC:43601]
1497	ENSG00000272369		-0.575343	-0.256608	-2.82563	0.00942906	0.204762	0.143849	18 x 40		12 q13
1498	ENSG00000108219	TSPAN14	0.409614	0.221957	2.81662	0.00942938	0.204762	0.14385	34 x 12		10 q23	tetraspanin 14 [Source:HGNC Symbol;Acc:HGNC:23303]
1499	ENSG00000143924	EML4	0.439057	0.23917	2.82587	0.00943214	0.204762	0.143863	29 x 20		2 p21	echinoderm microtubule associated protein like 4 [Source:HGNC Symbol;Acc:HGNC:1316]
1500	ENSG00000132423	COQ3	0.880011	0.51714	2.82252	0.00943861	0.204762	0.143892	35 x 29		6 q16	coenzyme Q3, methyltransferase [Source:HGNC Symbol;Acc:HGNC:18175]
1501	ENSG00000178988	MRFAP1L1	-0.586292	-0.260866	-2.81672	0.0094404	0.204762	0.1439	19 x 39		4 p16	Morf4 family associated protein 1 like 1 [Source:HGNC Symbol;Acc:HGNC:28796]
1502	ENSG00000269535		-0.364505	-0.170052	-2.81397	0.00944056	0.204762	0.143901	11 x 19		19 q13
1503	ENSG00000006071	ABCC8	-2.19497	-0.632979	-2.83477	0.00944283	0.204762	0.143911	1 x 1		11 p15	ATP binding cassette subfamily C member 8 [Source:HGNC Symbol;Acc:HGNC:59]
1504	ENSG00000180875	GREM2	-1.32793	-0.495002	-2.84411	0.00946209	0.204762	0.143998	19 x 1	G	1 q43	gremlin 2, DAN family BMP antagonist [Source:HGNC Symbol;Acc:HGNC:17655]
1505	ENSG00000096093	EFHC1	-0.846521	-0.355214	-2.85177	0.00946326	0.204762	0.144004	3 x 38		6 p12	EF-hand domain containing 1 [Source:HGNC Symbol;Acc:HGNC:16406]
1506	ENSG00000232027		-0.216686	-0.104207	-2.82806	0.00946724	0.204762	0.144022	13 x 17		1 p32
1507	ENSG00000183617	MRPL54	-0.6226	-0.274821	-2.80976	0.00951756	0.204762	0.144248	37 x 40		19 p13	mitochondrial ribosomal protein L54 [Source:HGNC Symbol;Acc:HGNC:16685]
1508	ENSG00000257906		0.376169	0.20261	2.97319	0.00953781	0.204762	0.144338	15 x 13		12 q13	long intergenic non-protein coding RNA 2156 [Source:HGNC Symbol;Acc:HGNC:53017]
1509	ENSG00000002919	SNX11	-0.443014	-0.203293	-2.8557	0.00954101	0.204762	0.144353	27 x 12		17 q21	sorting nexin 11 [Source:HGNC Symbol;Acc:HGNC:14975]
1510	ENSG00000260310		-0.57119	-0.254986	-2.81308	0.00954263	0.204762	0.14436	12 x 19		16 p13
1511	ENSG00000183196	CHST6	1.53064	0.996408	2.85403	0.00954683	0.204762	0.144379	26 x 6		16 q23	carbohydrate sulfotransferase 6 [Source:HGNC Symbol;Acc:HGNC:6938]
1512	ENSG00000164961	WASHC5	-0.836705	-0.351894	-2.82582	0.00954797	0.204762	0.144384	28 x 13		8 q24	WASH complex subunit 5 [Source:HGNC Symbol;Acc:HGNC:28984]
1513	ENSG00000272476		0.694554	0.395619	2.81331	0.00955531	0.204762	0.144417	33 x 29		6 q21
1514	ENSG00000259423		-0.565517	-0.252766	-2.86597	0.00955805	0.204762	0.144429	14 x 35		15 q14
1515	ENSG00000103067	ESRP2	-0.593806	-0.263775	-2.80663	0.00956369	0.204762	0.144454	24 x 16		16 q22	epithelial splicing regulatory protein 2 [Source:HGNC Symbol;Acc:HGNC:26152]
1516	ENSG00000175711	B3GNTL1	-0.538773	-0.242215	-2.82565	0.00956433	0.204762	0.144457	31 x 35		17 q25	UDP-GlcNAc:betaGal beta-1,3-N-acetylglucosaminyltransferase like 1 [Source:HGNC Symbol;Acc:HGNC:21727]
1517	ENSG00000211668		1.80749	1.22533	2.82333	0.00956517	0.204762	0.14446	40 x 1	E	22 q11	immunoglobulin lambda variable 2-11 [Source:HGNC Symbol;Acc:HGNC:5887]
1518	ENSG00000050130	JKAMP	-0.694352	-0.301644	-2.81669	0.00957625	0.204762	0.14451	1 x 15	I	14 q23	JNK1/MAPK8-associated membrane protein [Source:HGNC Symbol;Acc:HGNC:20184]
1519	ENSG00000185338	SOCS1	1.08934	0.662343	2.81353	0.00958194	0.204762	0.144535	38 x 7	E	16 p13	suppressor of cytokine signaling 1 [Source:HGNC Symbol;Acc:HGNC:19383]
1520	ENSG00000090621	PABPC4	0.540119	0.299534	2.85927	0.00958321	0.204762	0.144541	21 x 21		1 p34	poly(A) binding protein cytoplasmic 4 [Source:HGNC Symbol;Acc:HGNC:8557]
1521	ENSG00000123505	AMD1	1.00728	0.604407	2.80671	0.00958388	0.204762	0.144544	34 x 21	B	6 q21	adenosylmethionine decarboxylase 1 [Source:HGNC Symbol;Acc:HGNC:457]
1522	ENSG00000227218		-1.39422	-0.510717	-2.84482	0.0096025	0.204762	0.144626	17 x 17		9 q34
1523	ENSG00000137038	DMAC1	0.717364	0.410205	2.8319	0.00961071	0.204762	0.144662	34 x 37		9 p24	distal membrane arm assembly complex 1 [Source:HGNC Symbol;Acc:HGNC:30536]
1524	ENSG00000102003	SYP	-1.32625	-0.494592	-2.84824	0.00962438	0.204762	0.144723	3 x 33		X p11	synaptophysin [Source:HGNC Symbol;Acc:HGNC:11506]
1525	ENSG00000117322	CR2	2.07145	1.45749	2.94956	0.00962905	0.204762	0.144743	34 x 23	B	1 q32	complement C3d receptor 2 [Source:HGNC Symbol;Acc:HGNC:2336]
1526	ENSG00000255585	LOC651337	-0.435505	-0.200166	-2.84885	0.00964	0.204762	0.144791	7 x 23		9 q34
1527	ENSG00000267641		-0.403704	-0.186799	-2.80838	0.00964263	0.204762	0.144803	16 x 28		19 p12	BCL2 interacting protein 3 pseudogene 16 [Source:HGNC Symbol;Acc:HGNC:49696]
1528	ENSG00000132842	AP3B1	-0.426254	-0.196298	-2.82882	0.00964432	0.204762	0.14481	1 x 14	I	5 q14	adaptor related protein complex 3 beta 1 subunit [Source:HGNC Symbol;Acc:HGNC:566]
1529	ENSG00000254054		0.342462	0.183332	2.85076	0.00964863	0.204762	0.144829	16 x 12		8 p22
1530	ENSG00000124126	PREX1	-1.46182	-0.525863	-2.80258	0.00965369	0.204762	0.144852	1 x 4	H	20 q13	phosphatidylinositol-3,4,5-trisphosphate dependent Rac exchange factor 1 [Source:HGNC Symbol;Acc:HGNC:32594]
1531	ENSG00000260469		-0.928645	-0.382252	-2.96979	0.0096749	0.204762	0.144945	28 x 29		15 q24	C15orf59 antisense RNA 1 [Source:HGNC Symbol;Acc:HGNC:51422]
1532	ENSG00000125398	SOX9	1.56887	1.02713	2.80148	0.00967616	0.204762	0.14495	10 x 7		17 q24	SRY-box 9 [Source:HGNC Symbol;Acc:HGNC:11204]
1533	ENSG00000186577	SMIM29	-0.675666	-0.294755	-2.81087	0.00968947	0.204762	0.145008	40 x 40		6 p21	small integral membrane protein 29 [Source:HGNC Symbol;Acc:HGNC:1340]
1534	ENSG00000137824	RMDN3	-0.796016	-0.337934	-2.87119	0.00972075	0.204762	0.145145	15 x 38		15 q15	regulator of microtubule dynamics 3 [Source:HGNC Symbol;Acc:HGNC:25550]
1535	ENSG00000226856	LOC100506797	0.927069	0.549039	2.92511	0.0097226	0.204762	0.145153	33 x 27	B	2 q14
1536	ENSG00000213013		-0.712286	-0.308192	-2.80305	0.00973858	0.204762	0.145222	6 x 16		19 q13	ribosomal protein S15a pseudogene 36 [Source:HGNC Symbol;Acc:HGNC:36803]
1537	ENSG00000145860	RNF145	0.794082	0.460002	2.80769	0.00975396	0.204762	0.145289	38 x 18	C	5 q33	ring finger protein 145 [Source:HGNC Symbol;Acc:HGNC:20853]
1538	ENSG00000056558	TRAF1	0.952399	0.566388	2.89313	0.00978464	0.204762	0.145421	36 x 5		9 q33	TNF receptor associated factor 1 [Source:HGNC Symbol;Acc:HGNC:12031]
1539	ENSG00000196415	PRTN3	-0.931292	-0.383101	-2.92282	0.00979427	0.204762	0.145462	15 x 39		19 p13	proteinase 3 [Source:HGNC Symbol;Acc:HGNC:9495]
1540	ENSG00000205444		-0.679855	-0.296306	-2.84714	0.00979974	0.204762	0.145486	32 x 12		6 p25
1541	ENSG00000049541	RFC2	0.572661	0.319395	2.798	0.00980088	0.204762	0.145491	38 x 29		7 q11	replication factor C subunit 2 [Source:HGNC Symbol;Acc:HGNC:9970]
1542	ENSG00000135093	USP30	-0.540003	-0.242703	-2.80665	0.0098042	0.204762	0.145505	1 x 18		12 q24	ubiquitin specific peptidase 30 [Source:HGNC Symbol;Acc:HGNC:20065]
1543	ENSG00000166664	CHRFAM7A	0.74439	0.427616	2.86477	0.00983254	0.204762	0.145627	18 x 9		15 q13	CHRNA7 (exons 5-10) and FAM7A (exons A-E) fusion [Source:HGNC Symbol;Acc:HGNC:15781]
1544	ENSG00000102452	NALCN	1.49901	0.971202	2.86711	0.00984759	0.204762	0.145691	25 x 1	G	13 q33	sodium leak channel, non-selective [Source:HGNC Symbol;Acc:HGNC:19082]
1545	ENSG00000146276	GABRR1	-0.483015	-0.219769	-2.87823	0.00985089	0.204762	0.145705	25 x 29		6 q15	gamma-aminobutyric acid type A receptor rho1 subunit [Source:HGNC Symbol;Acc:HGNC:4090]
1546	ENSG00000256229	ZNF486	-1.57562	-0.549348	-2.79993	0.00986089	0.204762	0.145748	1 x 21		19 p12	zinc finger protein 486 [Source:HGNC Symbol;Acc:HGNC:20807]
1547	ENSG00000111405	ENDOU	-0.738868	-0.317782	-2.79352	0.00987741	0.204762	0.145818	17 x 24		12 q13	endonuclease, poly(U) specific [Source:HGNC Symbol;Acc:HGNC:14369]
1548	ENSG00000099864	PALM	-1.42996	-0.518836	-2.85502	0.00988191	0.204762	0.145837	5 x 1		19 p13	paralemmin [Source:HGNC Symbol;Acc:HGNC:8594]
1549	ENSG00000279413		0.805797	0.467707	2.80311	0.00991031	0.204762	0.145957	36 x 18		X p22
1550	ENSG00000267868		0.880038	0.517158	2.79115	0.0099262	0.204762	0.146025	9 x 31		13 q34
1551	ENSG00000267308	LINC01764	-0.449548	-0.206006	-2.80187	0.00993225	0.204762	0.14605	29 x 35		19 p13	long intergenic non-protein coding RNA 1764 [Source:HGNC Symbol;Acc:HGNC:52553]
1552	ENSG00000153064	BANK1	0.857932	0.502321	2.84284	0.00993777	0.204762	0.146073	36 x 4		4 q24	B-cell scaffold protein with ankyrin repeats 1 [Source:HGNC Symbol;Acc:HGNC:18233]
1553	ENSG00000144395	CCDC150	0.989963	0.592347	2.84521	0.00994117	0.204762	0.146088	38 x 25	C	2 q33	coiled-coil domain containing 150 [Source:HGNC Symbol;Acc:HGNC:26834]
1554	ENSG00000115419	GLS	0.77327	0.44638	2.79637	0.00995437	0.204762	0.146143	33 x 19		2 q32	glutaminase [Source:HGNC Symbol;Acc:HGNC:4331]
1555	ENSG00000080819	CPOX	0.52099	0.287956	2.83885	0.00999213	0.204762	0.146301	31 x 19		3 q11	coproporphyrinogen oxidase [Source:HGNC Symbol;Acc:HGNC:2321]
1556	ENSG00000104129	DNAJC17	-0.558335	-0.249946	-2.78876	0.0099983	0.204762	0.146327	16 x 40		15 q15	DnaJ heat shock protein family (Hsp40) member C17 [Source:HGNC Symbol;Acc:HGNC:25556]
1557	ENSG00000064195	DLX3	-1.77268	-0.584058	-2.78919	0.00999856	0.204762	0.146328	30 x 27		17 q21	distal-less homeobox 3 [Source:HGNC Symbol;Acc:HGNC:2916]
1558	ENSG00000251191	LINC00589	-1.2715	-0.480951	-2.95869	0.0100087	0.204762	0.146371	10 x 36		8 p12	long intergenic non-protein coding RNA 589 [Source:HGNC Symbol;Acc:HGNC:32299]
1559	ENSG00000267405		0.603875	0.338639	2.87398	0.0100164	0.204762	0.146403	16 x 10		17 q21
1560	ENSG00000103056	SMPD3	-1.19083	-0.459785	-2.78806	0.0100213	0.204762	0.146423	1 x 34		16 q22	sphingomyelin phosphodiesterase 3 [Source:HGNC Symbol;Acc:HGNC:14240]
1561	ENSG00000125124	BBS2	-0.514958	-0.232702	-2.82507	0.0100249	0.204762	0.146438	4 x 17		16 q13	Bardet-Biedl syndrome 2 [Source:HGNC Symbol;Acc:HGNC:967]
1562	ENSG00000156531	PHF6	0.561444	0.312526	2.79509	0.0100365	0.204762	0.146486	29 x 18		X q26	PHD finger protein 6 [Source:HGNC Symbol;Acc:HGNC:18145]
1563	ENSG00000112406	HECA	0.566347	0.315525	2.7866	0.0100382	0.204762	0.146493	30 x 8		6 q24	hdc homolog, cell cycle regulator [Source:HGNC Symbol;Acc:HGNC:21041]
1564	ENSG00000197696	NMB	1.0784	0.654545	2.80235	0.0100388	0.204762	0.146496	33 x 38		15 q25	neuromedin B [Source:HGNC Symbol;Acc:HGNC:7842]
1565	ENSG00000186001	LRCH3	0.385527	0.208002	2.80592	0.0100456	0.204762	0.146524	11 x 17		3 q29	leucine rich repeats and calponin homology domain containing 3 [Source:HGNC Symbol;Acc:HGNC:28637]
1566	ENSG00000184860	SDR42E1	0.970466	0.578839	2.82764	0.0100601	0.204762	0.146584	33 x 21		16 q23	short chain dehydrogenase/reductase family 42E, member 1 [Source:HGNC Symbol;Acc:HGNC:29834]
1567	ENSG00000104888	SLC17A7	-0.806693	-0.341628	-2.7919	0.0100634	0.204762	0.146598	16 x 8		19 q13	solute carrier family 17 member 7 [Source:HGNC Symbol;Acc:HGNC:16704]
1568	ENSG00000020426	MNAT1	-0.627279	-0.276601	-2.78889	0.0100691	0.204762	0.146621	21 x 38		14 q23	MNAT1, CDK activating kinase assembly factor [Source:HGNC Symbol;Acc:HGNC:7181]
1569	ENSG00000266283		0.484213	0.265896	2.78664	0.010086	0.204762	0.146691	10 x 9		18 q11
1570	ENSG00000260239		-1.02989	-0.413779	-2.92776	0.0100874	0.204762	0.146697	21 x 34		6 p25	long intergenic non-protein coding RNA 2533 [Source:HGNC Symbol;Acc:HGNC:53566]
1571	ENSG00000255202		0.811535	0.471491	2.89181	0.0101098	0.204762	0.146789	37 x 19	C	11 p13
1572	ENSG00000260135		0.980542	0.585811	2.81536	0.0101239	0.204762	0.146847	34 x 3	F	16 q12	MMP2 antisense RNA 1 [Source:HGNC Symbol;Acc:HGNC:53142]
1573	ENSG00000255240	LOC283194	1.37999	0.878105	2.78246	0.0101259	0.204762	0.146856	10 x 8		11 q12
1574	ENSG00000183833	MAATS1	-1.59747	-0.553569	-2.78241	0.0101422	0.204762	0.146922	1 x 39		3 q13	MYCBP associated and testis expressed 1 [Source:HGNC Symbol;Acc:HGNC:24010]
1575	ENSG00000200591		-0.339278	-0.159116	-2.7906	0.010168	0.204762	0.147027	9 x 17		1 p35	Y RNA [Source:RFAM;Acc:RF00019]
1576	ENSG00000229896		0.664074	0.376287	2.79159	0.0101832	0.204762	0.147089	34 x 29		6 p24
1577	ENSG00000075223	SEMA3C	-1.39696	-0.51135	-2.78453	0.0101934	0.204762	0.147131	2 x 1		7 q21	semaphorin 3C [Source:HGNC Symbol;Acc:HGNC:10725]
1578	ENSG00000121380	BCL2L14	1.6141	1.06385	2.89858	0.010197	0.204762	0.147145	39 x 8	D	12 p13	BCL2 like 14 [Source:HGNC Symbol;Acc:HGNC:16657]
1579	ENSG00000253537	PCDHGA7	-1.23856	-0.47246	-2.85183	0.010199	0.204762	0.147154	7 x 4		5 q31	protocadherin gamma subfamily A, 7 [Source:HGNC Symbol;Acc:HGNC:8705]
1580	ENSG00000259479	SORD2P	-1.42834	-0.518473	-2.79064	0.0102029	0.204762	0.14717	25 x 15		15 q21	sorbitol dehydrogenase 2, pseudogene [Source:HGNC Symbol;Acc:HGNC:49919]
1581	ENSG00000255650	FAM222A-AS1	-0.87229	-0.363839	-2.80656	0.0102053	0.204762	0.147179	10 x 35		12 q24	FAM222A antisense RNA 1 [Source:HGNC Symbol;Acc:HGNC:28223]
1582	ENSG00000150551	LYPD1	1.31733	0.830197	2.90237	0.0102086	0.204762	0.147193	37 x 13		2 q21	LY6/PLAUR domain containing 1 [Source:HGNC Symbol;Acc:HGNC:28431]
1583	ENSG00000256650		-0.965687	-0.394017	-2.85455	0.0102159	0.204762	0.147222	2 x 24		12 p12	RERG intronic transcript 1 [Source:HGNC Symbol;Acc:HGNC:39991]
1584	ENSG00000167302	TEPSIN	-0.477536	-0.217531	-2.81155	0.0102325	0.204762	0.147289	12 x 25		17 q25	TEPSIN, adaptor related protein complex 4 accessory protein [Source:HGNC Symbol;Acc:HGNC:26458]
1585	ENSG00000170854	RIOX2	0.776511	0.448496	2.81239	0.0102471	0.204762	0.147348	33 x 16		3 q11	ribosomal oxygenase 2 [Source:HGNC Symbol;Acc:HGNC:19441]
1586	ENSG00000259036		-0.24245	-0.11599	-2.78436	0.0102504	0.204762	0.147361	13 x 16		14 q32
1587	ENSG00000224478		0.494341	0.271945	2.82838	0.0102604	0.204762	0.147402	20 x 26		6 q25
1588	ENSG00000251664	PCDHA12	-1.42694	-0.518159	-2.78814	0.0102695	0.204762	0.147438	5 x 5	H	5 q31	protocadherin alpha 12 [Source:HGNC Symbol;Acc:HGNC:8666]
1589	ENSG00000224167		0.850783	0.497544	2.84609	0.0103063	0.204762	0.147586	34 x 32		1 p13
1590	ENSG00000196747	HIST1H2AI	-1.49407	-0.532774	-2.82694	0.0103064	0.204762	0.147586	40 x 32	A	6 p22	histone cluster 1 H2A family member i [Source:HGNC Symbol;Acc:HGNC:4725]
1591	ENSG00000136504	KAT7	-0.508848	-0.230244	-2.79262	0.0103079	0.204762	0.147592	1 x 12	I	17 q21	lysine acetyltransferase 7 [Source:HGNC Symbol;Acc:HGNC:17016]
1592	ENSG00000236307		0.605377	0.339569	2.78009	0.0103081	0.204762	0.147593	34 x 31		2 q13	eukaryotic translation elongation factor 1 epsilon 1 pseudogene 1 [Source:HGNC Symbol;Acc:HGNC:51459]
1593	ENSG00000248050		-0.565936	-0.25293	-2.77587	0.0103088	0.204762	0.147596	12 x 36		8 q23
1594	ENSG00000251169	LINC01843	-1.29505	-0.48689	-2.77486	0.0103091	0.204762	0.147597	7 x 37		5 q31	long intergenic non-protein coding RNA 1843 [Source:HGNC Symbol;Acc:HGNC:52659]
1595	ENSG00000241155	ARHGAP31-AS1	0.748066	0.429996	2.78522	0.0103133	0.204762	0.147614	30 x 24	B	3 q13	ARHGAP31 antisense RNA 1 [Source:HGNC Symbol;Acc:HGNC:41235]
1596	ENSG00000101194	SLC17A9	-1.74373	-0.579431	-2.81894	0.0103241	0.204762	0.147657	19 x 18		20 q13	solute carrier family 17 member 9 [Source:HGNC Symbol;Acc:HGNC:16192]
1597	ENSG00000100150	DEPDC5	0.40892	0.221554	2.77348	0.010332	0.204762	0.147688	24 x 17		22 q12	DEP domain containing 5 [Source:HGNC Symbol;Acc:HGNC:18423]
1598	ENSG00000273760		1.43863	0.923632	2.97423	0.0103389	0.204762	0.147716	10 x 7		10 q11
1599	ENSG00000155511	GRIA1	-0.909119	-0.375942	-2.84673	0.0103389	0.204762	0.147716	1 x 1		5 q33	glutamate ionotropic receptor AMPA type subunit 1 [Source:HGNC Symbol;Acc:HGNC:4571]
1600	ENSG00000109111	SUPT6H	-0.473067	-0.215701	-2.7732	0.0103397	0.204762	0.147719	24 x 17		17 q11	SPT6 homolog, histone chaperone [Source:HGNC Symbol;Acc:HGNC:11470]
1601	ENSG00000278903		0.380072	0.204857	2.82483	0.0103542	0.204762	0.147777	18 x 32		21 p12
1602	ENSG00000173064	HECTD4	-0.665327	-0.290915	-2.77414	0.0103673	0.204762	0.147829	1 x 7	H	12 q24	HECT domain E3 ubiquitin protein ligase 4 [Source:HGNC Symbol;Acc:HGNC:26611]
1603	ENSG00000248858	FLJ46284	-0.536339	-0.241248	-2.7723	0.0103682	0.204762	0.147832	11 x 30		8 q22	uncharacterized LOC441369 [Source:NCBI gene;Acc:441369]
1604	ENSG00000140527	WDR93	-1.16611	-0.453046	-2.87744	0.0103684	0.204762	0.147833	1 x 40		15 q26	WD repeat domain 93 [Source:HGNC Symbol;Acc:HGNC:26924]
1605	ENSG00000137692	DCUN1D5	0.827048	0.481753	2.77344	0.010372	0.204762	0.147847	36 x 31		11 q22	defective in cullin neddylation 1 domain containing 5 [Source:HGNC Symbol;Acc:HGNC:28409]
1606	ENSG00000228624	HDAC2-AS2	0.673007	0.381935	2.82872	0.0103795	0.204762	0.147877	34 x 21	B	6 q21	HDAC2 and HS3ST5 antisense RNA 2 [Source:HGNC Symbol;Acc:HGNC:43590]
1607	ENSG00000177679	SRRM3	-1.32694	-0.49476	-2.77157	0.0103814	0.204762	0.147885	2 x 1		7 q11	serine/arginine repetitive matrix 3 [Source:HGNC Symbol;Acc:HGNC:26729]
1608	ENSG00000167880	EVPL	-1.23034	-0.47031	-2.78341	0.0103895	0.204762	0.147917	22 x 15		17 q25	envoplakin [Source:HGNC Symbol;Acc:HGNC:3503]
1609	ENSG00000111344	RASAL1	2.07786	1.4633	2.80934	0.0103925	0.204762	0.147928	21 x 22		12 q24	RAS protein activator like 1 [Source:HGNC Symbol;Acc:HGNC:9873]
1610	ENSG00000261716		-0.85066	-0.356608	-2.77158	0.0103947	0.204762	0.147937	8 x 31		1 q21
1611	ENSG00000167103	PIP5KL1	-0.97078	-0.395614	-2.78537	0.0103986	0.204762	0.147953	5 x 32		9 q34	phosphatidylinositol-4-phosphate 5-kinase like 1 [Source:HGNC Symbol;Acc:HGNC:28711]
1612	ENSG00000242244		0.285207	0.151092	2.79413	0.01042	0.204762	0.148037	17 x 24		3 q22	ATP synthase, H+ transporting, mitochondrial Fo complex subunit C1 (subunit 9) pseudogene 3 [Source:HGNC Symbol;Acc:HGNC:39506]
1613	ENSG00000230665		0.430561	0.234186	2.76973	0.0104276	0.204762	0.148067	20 x 33		X q13	THAP domain containing 12 pseudogene 1 [Source:HGNC Symbol;Acc:HGNC:39563]
1614	ENSG00000275763		-0.724843	-0.312739	-2.78113	0.0104366	0.204762	0.148102	4 x 36		18 q23	chromosome 18 open reading frame 65 [Source:HGNC Symbol;Acc:HGNC:51248]
1615	ENSG00000159111	MRPL10	-0.595685	-0.264501	-2.80874	0.0104437	0.204762	0.14813	20 x 40		17 q21	mitochondrial ribosomal protein L10 [Source:HGNC Symbol;Acc:HGNC:14055]
1616	ENSG00000253669	LOC401472	-0.704969	-0.305528	-2.81413	0.0104579	0.204762	0.148186	24 x 11		8 q22
1617	ENSG00000168993	CPLX1	-1.31379	-0.49154	-2.78541	0.0104614	0.204762	0.1482	3 x 34		4 p16	complexin 1 [Source:HGNC Symbol;Acc:HGNC:2309]
1618	ENSG00000131019	ULBP3	1.20896	0.74915	2.8106	0.0104638	0.204762	0.148209	33 x 23	B	6 q25	UL16 binding protein 3 [Source:HGNC Symbol;Acc:HGNC:14895]
1619	ENSG00000254416		1.14061	0.69921	2.87663	0.0104704	0.204762	0.148235	35 x 23	B	11 q22
1620	ENSG00000105784	RUNDC3B	-0.957044	-0.391296	-2.77069	0.0104717	0.204762	0.14824	13 x 8		7 q21	RUN domain containing 3B [Source:HGNC Symbol;Acc:HGNC:30286]
1621	ENSG00000147889	CDKN2A	1.78554	1.20664	2.7916	0.0104808	0.204762	0.148275	38 x 23	C	9 p21	cyclin dependent kinase inhibitor 2A [Source:HGNC Symbol;Acc:HGNC:1787]
1622	ENSG00000008283	CYB561	-0.868365	-0.362534	-2.77642	0.0104938	0.204762	0.148326	25 x 13		17 q23	cytochrome b561 [Source:HGNC Symbol;Acc:HGNC:2571]
1623	ENSG00000196418	ZNF124	1.08858	0.661802	2.77142	0.0105162	0.204762	0.148413	29 x 21		1 q44	zinc finger protein 124 [Source:HGNC Symbol;Acc:HGNC:12907]
1624	ENSG00000138036	DYNC2LI1	-0.571946	-0.255282	-2.7956	0.0105185	0.204762	0.148422	5 x 34		2 p21	dynein cytoplasmic 2 light intermediate chain 1 [Source:HGNC Symbol;Acc:HGNC:24595]
1625	ENSG00000206168		-0.443736	-0.203594	-2.76864	0.0105191	0.204762	0.148424	18 x 36		16 p13
1626	ENSG00000120949	TNFRSF8	0.75243	0.432823	2.76696	0.0105381	0.204762	0.148498	34 x 4		1 p36	TNF receptor superfamily member 8 [Source:HGNC Symbol;Acc:HGNC:11923]
1627	ENSG00000261159		0.82116	0.477852	2.78211	0.0105595	0.204762	0.148581	8 x 29		3 q21
1628	ENSG00000165194	PCDH19	-1.98522	-0.613018	-2.77041	0.0105698	0.204762	0.14862	6 x 4		X q22	protocadherin 19 [Source:HGNC Symbol;Acc:HGNC:14270]
1629	ENSG00000179935		0.592115	0.331366	2.82466	0.0105714	0.204762	0.148627	26 x 23		20 p11	long intergenic non-protein coding RNA 652 [Source:HGNC Symbol;Acc:HGNC:25003]
1630	ENSG00000132254	ARFIP2	-0.661335	-0.289426	-2.80459	0.0105732	0.204762	0.148634	18 x 39		11 p15	ADP ribosylation factor interacting protein 2 [Source:HGNC Symbol;Acc:HGNC:17160]
1631	ENSG00000175455	CCDC14	0.928497	0.550014	2.77301	0.010588	0.204762	0.148691	11 x 26		3 q21	coiled-coil domain containing 14 [Source:HGNC Symbol;Acc:HGNC:25766]
1632	ENSG00000130714	POMT1	-0.69343	-0.301306	-2.77237	0.010592	0.204762	0.148706	21 x 14		9 q34	protein O-mannosyltransferase 1 [Source:HGNC Symbol;Acc:HGNC:9202]
1633	ENSG00000073584	SMARCE1	-0.562411	-0.251548	-2.79043	0.0105949	0.204762	0.148717	1 x 17		17 q21	SWI/SNF related, matrix associated, actin dependent regulator of chromatin, subfamily e, member 1 [Source:HGNC Symbol;Acc:HGNC:11109]
1634	ENSG00000121486	TRMT1L	-0.554807	-0.248557	-2.76429	0.0106109	0.204762	0.148778	1 x 15	I	1 q25	tRNA methyltransferase 1 like [Source:HGNC Symbol;Acc:HGNC:16782]
1635	ENSG00000143878	RHOB	-1.32295	-0.493786	-2.76217	0.0106185	0.204762	0.148808	2 x 1		2 p24	ras homolog family member B [Source:HGNC Symbol;Acc:HGNC:668]
1636	ENSG00000260213		0.382438	0.20622	2.77137	0.010619	0.204762	0.14881	25 x 22		16 q23
1637	ENSG00000183208		-0.751119	-0.322155	-2.76981	0.010625	0.204762	0.148833	16 x 37		15 q26	GDP-D-glucose phosphorylase 1 [Source:HGNC Symbol;Acc:HGNC:34360]
1638	ENSG00000230148	HOXB-AS1	-0.96909	-0.395085	-2.76115	0.0106354	0.204762	0.148872	12 x 35		17 q21	HOXB cluster antisense RNA 1 [Source:HGNC Symbol;Acc:HGNC:43744]
1639	ENSG00000168228	ZCCHC4	-0.390719	-0.181285	-2.81154	0.0106482	0.204762	0.148921	1 x 16	I	4 p15	zinc finger CCHC-type containing 4 [Source:HGNC Symbol;Acc:HGNC:22917]
1640	ENSG00000177103	DSCAML1	-1.34433	-0.498969	-2.76008	0.0106604	0.204762	0.148968	1 x 35		11 q23	DS cell adhesion molecule like 1 [Source:HGNC Symbol;Acc:HGNC:14656]
1641	ENSG00000083454	P2RX5	1.11697	0.682149	2.85334	0.0106648	0.204762	0.148984	36 x 7		17 p13	purinergic receptor P2X 5 [Source:HGNC Symbol;Acc:HGNC:8536]
1642	ENSG00000235106		-0.681447	-0.296894	-2.76204	0.0106863	0.204762	0.149066	5 x 36		9 q34	long intergenic non-protein coding RNA 94 [Source:HGNC Symbol;Acc:HGNC:24742]
1643	ENSG00000154229	PRKCA	0.992845	0.59435	2.77315	0.010693	0.204762	0.149091	9 x 6		17 q24	protein kinase C alpha [Source:HGNC Symbol;Acc:HGNC:9393]
1644	ENSG00000255302	EID1	-0.603594	-0.267548	-2.79288	0.0106981	0.204762	0.149111	20 x 40		15 q21	EP300 interacting inhibitor of differentiation 1 [Source:HGNC Symbol;Acc:HGNC:1191]
1645	ENSG00000274173		-1.15376	-0.449635	-2.76529	0.0106995	0.204762	0.149116	8 x 40	K	20 p11
1646	ENSG00000131620	ANO1	-1.13578	-0.444617	-2.76288	0.0107049	0.204762	0.149136	1 x 4	H	11 q13	anoctamin 1 [Source:HGNC Symbol;Acc:HGNC:21625]
1647	ENSG00000151116	UEVLD	-0.713679	-0.308698	-2.7629	0.0107182	0.204762	0.149187	1 x 13	I	11 p15	UEV and lactate/malate dehyrogenase domains [Source:HGNC Symbol;Acc:HGNC:30866]
1648	ENSG00000100605	ITPK1	-0.69342	-0.301302	-2.76737	0.0107239	0.204762	0.149208	14 x 38		14 q32	inositol-tetrakisphosphate 1-kinase [Source:HGNC Symbol;Acc:HGNC:6177]
1649	ENSG00000164309	CMYA5	-1.21399	-0.465992	-2.76602	0.0107296	0.204762	0.14923	1 x 24		5 q14	cardiomyopathy associated 5 [Source:HGNC Symbol;Acc:HGNC:14305]
1650	ENSG00000112096	SOD2	1.08009	0.655746	2.83488	0.0107329	0.204762	0.149242	40 x 9	D	6 q25	superoxide dismutase 2 [Source:HGNC Symbol;Acc:HGNC:11180]
1651	ENSG00000206432	TMEM200C	1.43606	0.92162	2.86833	0.0107367	0.204762	0.149256	15 x 4		18 p11	transmembrane protein 200C [Source:HGNC Symbol;Acc:HGNC:37208]
1652	ENSG00000050344	NFE2L3	1.273	0.796773	2.78096	0.0107545	0.204762	0.149324	34 x 21	B	7 p15	nuclear factor, erythroid 2 like 3 [Source:HGNC Symbol;Acc:HGNC:7783]
1653	ENSG00000115507	OTX1	1.69779	1.13284	2.75743	0.0107615	0.204762	0.14935	39 x 23	C	2 p15	orthodenticle homeobox 1 [Source:HGNC Symbol;Acc:HGNC:8521]
1654	ENSG00000118640	VAMP8	-0.669052	-0.292301	-2.79711	0.0107635	0.204762	0.149358	39 x 36		2 p11	vesicle associated membrane protein 8 [Source:HGNC Symbol;Acc:HGNC:12647]
1655	ENSG00000237637		-0.454325	-0.207984	-2.78673	0.0107799	0.204762	0.149419	12 x 33		13 q13	FRY antisense RNA 1 [Source:HGNC Symbol;Acc:HGNC:39725]
1656	ENSG00000150967	ABCB9	-0.863207	-0.360814	-2.75669	0.0107841	0.204762	0.149435	23 x 14		12 q24	ATP binding cassette subfamily B member 9 [Source:HGNC Symbol;Acc:HGNC:50]
1657	ENSG00000119227	PIGZ	0.685543	0.389885	2.75497	0.0107905	0.204762	0.149459	18 x 13		3 q29	phosphatidylinositol glycan anchor biosynthesis class Z [Source:HGNC Symbol;Acc:HGNC:30596]
1658	ENSG00000205022	PABPN1L	-0.392075	-0.181862	-2.89591	0.0107911	0.204762	0.149461	17 x 15		16 q24	poly(A) binding protein nuclear 1 like, cytoplasmic [Source:HGNC Symbol;Acc:HGNC:37237]
1659	ENSG00000007944	MYLIP	-0.838346	-0.35245	-2.76905	0.0107976	0.204762	0.149485	1 x 15	I	6 p22	myosin regulatory light chain interacting protein [Source:HGNC Symbol;Acc:HGNC:21155]
1660	ENSG00000197885	NKIRAS1	-0.52818	-0.237997	-2.78519	0.0107991	0.204762	0.149491	20 x 39		3 p24	NFKB inhibitor interacting Ras like 1 [Source:HGNC Symbol;Acc:HGNC:17899]
1661	ENSG00000142408	CACNG8	-1.23172	-0.470671	-2.82846	0.0108033	0.204762	0.149506	16 x 18		19 q13	calcium voltage-gated channel auxiliary subunit gamma 8 [Source:HGNC Symbol;Acc:HGNC:13628]
1662	ENSG00000003402	CFLAR	0.483357	0.265386	2.79525	0.0108109	0.204762	0.149535	35 x 10		2 q33	CASP8 and FADD like apoptosis regulator [Source:HGNC Symbol;Acc:HGNC:1876]
1663	ENSG00000267530		-0.834971	-0.351305	-2.7561	0.0108208	0.204762	0.149572	3 x 26		19 p13	long intergenic non-protein coding RNA 1836 [Source:HGNC Symbol;Acc:HGNC:52652]
1664	ENSG00000253309	SERPINE3	-0.515005	-0.232721	-2.76707	0.0108262	0.207992	0.149592	9 x 20		13 q14	serpin family E member 3 [Source:HGNC Symbol;Acc:HGNC:24774]
1665	ENSG00000181031	RPH3AL	-1.08711	-0.430714	-2.76648	0.0108477	0.207992	0.149675	6 x 37		17 p13	rabphilin 3A like (without C2 domains) [Source:HGNC Symbol;Acc:HGNC:10296]
1666	ENSG00000054277	OPN3	0.8196	0.47682	2.77976	0.010848	0.207992	0.149676	27 x 21		1 q43	opsin 3 [Source:HGNC Symbol;Acc:HGNC:14007]
1667	ENSG00000143850	PLEKHA6	-1.11706	-0.439322	-2.8541	0.0108663	0.207992	0.149747	12 x 40	K	1 q32	pleckstrin homology domain containing A6 [Source:HGNC Symbol;Acc:HGNC:17053]
1668	ENSG00000166012	TAF1D	0.72797	0.417021	2.75253	0.010879	0.207992	0.149796	16 x 26		11 q21	TATA-box binding protein associated factor, RNA polymerase I subunit D [Source:HGNC Symbol;Acc:HGNC:28759]
1669	ENSG00000214313	AZGP1P1	-1.56377	-0.54702	-2.77659	0.0108849	0.207992	0.149819	7 x 38	K	7 q22	alpha-2-glycoprotein 1, zinc-binding pseudogene 1 [Source:HGNC Symbol;Acc:HGNC:911]
1670	ENSG00000100095	SEZ6L	-1.47048	-0.527739	-2.81408	0.0108903	0.207992	0.149839	1 x 1		22 q12	seizure related 6 homolog like [Source:HGNC Symbol;Acc:HGNC:10763]
1671	ENSG00000135679	MDM2	-0.684428	-0.297994	-2.77405	0.0109162	0.207992	0.149939	1 x 16	I	12 q15	MDM2 proto-oncogene [Source:HGNC Symbol;Acc:HGNC:6973]
1672	ENSG00000278192		0.697103	0.397244	2.81354	0.0109242	0.207992	0.14997	11 x 6		20 p12
1673	ENSG00000184678	HIST2H2BE	-1.37396	-0.506005	-2.7477	0.0109727	0.207992	0.150155	15 x 40		1 q21	histone cluster 2 H2B family member e [Source:HGNC Symbol;Acc:HGNC:4760]
1674	ENSG00000260583		-0.564303	-0.25229	-2.785	0.0109839	0.207992	0.150197	13 x 31		21 q21
1675	ENSG00000230836		-0.939632	-0.385769	-2.81401	0.0109937	0.207992	0.150235	14 x 16		2 p12	long intergenic non-protein coding RNA 1293 [Source:HGNC Symbol;Acc:HGNC:50362]
1676	ENSG00000101134	DOK5	1.22453	0.760656	2.79289	0.0110115	0.207992	0.150302	38 x 13		20 q13	docking protein 5 [Source:HGNC Symbol;Acc:HGNC:16173]
1677	ENSG00000152952	PLOD2	0.835765	0.487539	2.76577	0.0110261	0.207992	0.150357	25 x 6		3 q24	procollagen-lysine,2-oxoglutarate 5-dioxygenase 2 [Source:HGNC Symbol;Acc:HGNC:9082]
1678	ENSG00000126259	KIRREL2	1.59459	1.04796	2.85443	0.011027	0.207992	0.150361	30 x 26		19 q13	kirre like nephrin family adhesion molecule 2 [Source:HGNC Symbol;Acc:HGNC:18816]
1679	ENSG00000103502	CDIPT	-0.491214	-0.223108	-2.74572	0.0110346	0.207992	0.150389	17 x 40		16 p11	CDP-diacylglycerol--inositol 3-phosphatidyltransferase [Source:HGNC Symbol;Acc:HGNC:1769]
1680	ENSG00000175575	PAAF1	-0.569599	-0.254364	-2.7486	0.0110463	0.207992	0.150433	19 x 40		11 q13	proteasomal ATPase associated factor 1 [Source:HGNC Symbol;Acc:HGNC:25687]
1681	ENSG00000268573		-0.932993	-0.383646	-2.75025	0.0110489	0.207992	0.150443	7 x 16		18 q12
1682	ENSG00000152977	ZIC1	2.77949	2.1472	2.74308	0.0110926	0.207992	0.150607	34 x 24	B	3 q24	Zic family member 1 [Source:HGNC Symbol;Acc:HGNC:12872]
1683	ENSG00000229153	EPHA1-AS1	0.596084	0.333818	2.75591	0.0111197	0.207992	0.150709	34 x 11		7 q35	EPHA1 antisense RNA 1 [Source:HGNC Symbol;Acc:HGNC:27799]
1684	ENSG00000244627		0.702796	0.400878	2.74641	0.0111287	0.207992	0.150742	20 x 24		22 q13
1685	ENSG00000263011		-0.690953	-0.300396	-2.75054	0.0111339	0.207992	0.150762	3 x 40		16 p13
1686	ENSG00000206936		0.392659	0.212122	2.8214	0.0111364	0.207992	0.150771	16 x 20		X p11	RNA, U4 small nuclear 52, pseudogene [Source:HGNC Symbol;Acc:HGNC:46988]
1687	ENSG00000105617	LENG1	-0.803058	-0.340373	-2.74702	0.0111406	0.207992	0.150787	40 x 37		19 q13	leukocyte receptor cluster member 1 [Source:HGNC Symbol;Acc:HGNC:15502]
1688	ENSG00000173928	SWSAP1	-0.679291	-0.296097	-2.75393	0.0111603	0.207992	0.15086	35 x 37		19 p13	SWIM-type zinc finger 7 associated protein 1 [Source:HGNC Symbol;Acc:HGNC:26638]
1689	ENSG00000167363	FN3K	-0.886631	-0.368583	-2.84203	0.0111658	0.207992	0.15088	16 x 40		17 q25	fructosamine 3 kinase [Source:HGNC Symbol;Acc:HGNC:24822]
1690	ENSG00000169026	MFSD7	-1.12203	-0.440735	-2.74206	0.0111687	0.207992	0.150891	13 x 40		4 p16	major facilitator superfamily domain containing 7 [Source:HGNC Symbol;Acc:HGNC:26177]
1691	ENSG00000161513	FDXR	-1.13972	-0.445722	-2.77465	0.0111796	0.207992	0.150932	18 x 40		17 q25	ferredoxin reductase [Source:HGNC Symbol;Acc:HGNC:3642]
1692	ENSG00000146411	SLC2A12	1.3308	0.840435	2.73971	0.0111919	0.207992	0.150977	33 x 22	B	6 q23	solute carrier family 2 member 12 [Source:HGNC Symbol;Acc:HGNC:18067]
1693	ENSG00000215005		0.36185	0.194393	2.74348	0.0112077	0.207992	0.151035	23 x 35		21 q21	heat shock protein family D (Hsp60) member 1 pseudogene 7 [Source:HGNC Symbol;Acc:HGNC:5268]
1694	ENSG00000244585		0.301276	0.160076	2.7506	0.0112097	0.207992	0.151043	28 x 40		12 q24	ribosomal protein L12 pseudogene 33 [Source:HGNC Symbol;Acc:HGNC:35696]
1695	ENSG00000239415		0.861278	0.504561	2.81044	0.0112237	0.207992	0.151094	12 x 27		21 q22
1696	ENSG00000236914	LINC01852	0.4713	0.258213	2.74772	0.0112351	0.207992	0.151136	16 x 8		15 q14	long intergenic non-protein coding RNA 1852 [Source:HGNC Symbol;Acc:HGNC:52668]
1697	ENSG00000173083	HPSE	1.02937	0.619874	2.74016	0.0112529	0.207992	0.151202	40 x 7	E	4 q21	heparanase [Source:HGNC Symbol;Acc:HGNC:5164]
1698	ENSG00000135373	EHF	1.96432	1.36163	2.74627	0.0112702	0.207992	0.151265	5 x 9	H	11 p13	ETS homologous factor [Source:HGNC Symbol;Acc:HGNC:3246]
1699	ENSG00000238045		-0.590037	-0.262317	-2.74216	0.0112735	0.207992	0.151277	9 x 32		16 p11
1700	ENSG00000276980		1.36156	0.863933	2.78306	0.0112776	0.207992	0.151292	40 x 8	D	19 p13
1701	ENSG00000161921	CXCL16	0.931282	0.551916	2.75518	0.0112839	0.207992	0.151315	39 x 10	D	17 p13	C-X-C motif chemokine ligand 16 [Source:HGNC Symbol;Acc:HGNC:16642]
1702	ENSG00000179066		1.80741	1.22526	2.74851	0.0112853	0.207992	0.15132	39 x 22	C	19 q13
1703	ENSG00000139625	MAP3K12	-0.836316	-0.351762	-2.75924	0.0112951	0.207992	0.151356	3 x 26		12 q13	mitogen-activated protein kinase kinase kinase 12 [Source:HGNC Symbol;Acc:HGNC:6851]
1704	ENSG00000214012		-0.450585	-0.206436	-2.75743	0.0113012	0.207992	0.151378	24 x 38		6 p22	keratin 18 pseudogene 38 [Source:HGNC Symbol;Acc:HGNC:33407]
1705	ENSG00000279717		-0.747496	-0.320865	-2.86128	0.0113064	0.207992	0.151397	1 x 33		19 p13
1706	ENSG00000270170		0.583794	0.326237	2.76538	0.0113093	0.207992	0.151408	35 x 34		3 q29	NCBP2 antisense RNA 2 (head to head) [Source:HGNC Symbol;Acc:HGNC:25121]
1707	ENSG00000171428	NAT1	-2.38564	-0.643694	-2.75995	0.0113188	0.207992	0.151442	9 x 38	K	8 p22	N-acetyltransferase 1 [Source:HGNC Symbol;Acc:HGNC:7645]
1708	ENSG00000256779		0.612173	0.343787	2.80447	0.0113228	0.207992	0.151457	35 x 17		11 q21
1709	ENSG00000085365	SCAMP1	-0.583526	-0.259793	-2.78335	0.011334	0.207992	0.151498	1 x 15	I	5 q14	secretory carrier membrane protein 1 [Source:HGNC Symbol;Acc:HGNC:10563]
1710	ENSG00000172889	EGFL7	-1.07058	-0.425887	-2.73503	0.0113351	0.207992	0.151502	16 x 7		9 q34	EGF like domain multiple 7 [Source:HGNC Symbol;Acc:HGNC:20594]
1711	ENSG00000101435	CST9L	-1.39476	-0.510842	-2.89312	0.0113421	0.207992	0.151527	7 x 36		20 p11	cystatin 9 like [Source:HGNC Symbol;Acc:HGNC:16233]
1712	ENSG00000255455	LOC103611081	-0.658876	-0.288508	-2.78076	0.0113505	0.207992	0.151558	2 x 25		11 q24
1713	ENSG00000177189	RPS6KA3	0.5761	0.321506	2.82236	0.0113552	0.207992	0.151575	28 x 5		X p22	ribosomal protein S6 kinase A3 [Source:HGNC Symbol;Acc:HGNC:10432]
1714	ENSG00000153230		-0.381916	-0.177527	-2.75069	0.0113556	0.207992	0.151576	8 x 13		1 q44	olfactory receptor family 14 subfamily K member 1 [Source:HGNC Symbol;Acc:HGNC:15025]
1715	ENSG00000168685	IL7R	1.43052	0.91729	2.73117	0.0114032	0.207992	0.151748	38 x 1	E	5 p13	interleukin 7 receptor [Source:HGNC Symbol;Acc:HGNC:6024]
1716	ENSG00000243176		0.43849	0.238837	2.73156	0.0114105	0.207992	0.151774	20 x 25		3 q25
1717	ENSG00000102886	GDPD3	-1.70053	-0.572227	-2.8574	0.0114148	0.207992	0.151789	15 x 40		16 p11	glycerophosphodiester phosphodiesterase domain containing 3 [Source:HGNC Symbol;Acc:HGNC:28638]
1718	ENSG00000101871	MID1	1.36576	0.867158	2.75516	0.0114157	0.207992	0.151793	11 x 6		X p22	midline 1 [Source:HGNC Symbol;Acc:HGNC:7095]
1719	ENSG00000216331		-1.22628	-0.469243	-2.75539	0.011439	0.207992	0.151876	26 x 14		6 p22	histone cluster 1 H1 pseudogene 1 [Source:HGNC Symbol;Acc:HGNC:19163]
1720	ENSG00000214417		-0.514947	-0.232697	-2.7316	0.011458	0.207992	0.151944	24 x 39		9 q22	keratin 18 pseudogene 13 [Source:HGNC Symbol;Acc:HGNC:6432]
1721	ENSG00000244187	TMEM141	-0.997957	-0.40405	-2.7314	0.011463	0.207992	0.151962	40 x 40		9 q34	transmembrane protein 141 [Source:HGNC Symbol;Acc:HGNC:28211]
1722	ENSG00000168350	DEGS2	-2.08557	-0.623637	-2.75391	0.0114704	0.207992	0.151989	9 x 40	K	14 q32	delta 4-desaturase, sphingolipid 2 [Source:HGNC Symbol;Acc:HGNC:20113]
1723	ENSG00000160396	HIPK4	-0.848307	-0.355816	-2.82149	0.0114727	0.207992	0.151997	19 x 12		19 q13	homeodomain interacting protein kinase 4 [Source:HGNC Symbol;Acc:HGNC:19007]
1724	ENSG00000264522	OTUD7B	-0.606137	-0.268525	-2.73081	0.0114746	0.207992	0.152004	2 x 10	I	1 q21	OTU deubiquitinase 7B [Source:HGNC Symbol;Acc:HGNC:16683]
1725	ENSG00000113522	RAD50	-0.497908	-0.225823	-2.74516	0.0114757	0.207992	0.152007	1 x 14	I	5 q31	RAD50 double strand break repair protein [Source:HGNC Symbol;Acc:HGNC:9816]
1726	ENSG00000169660	HEXDC	-0.588212	-0.261611	-2.73514	0.0114771	0.207992	0.152012	8 x 30		17 q25	hexosaminidase D [Source:HGNC Symbol;Acc:HGNC:26307]
1727	ENSG00000213073	LOC729603	0.621302	0.349465	2.72843	0.0114807	0.207992	0.152025	11 x 23		6 q25
1728	ENSG00000278987		-0.440876	-0.202404	-2.72791	0.0114965	0.207992	0.152081	6 x 22		16 p13
1729	ENSG00000163534	FCRL1	1.10745	0.675308	2.90583	0.0115054	0.207992	0.152113	36 x 5		1 q23	Fc receptor like 1 [Source:HGNC Symbol;Acc:HGNC:18509]
1730	ENSG00000226874		-0.461027	-0.210751	-2.73202	0.0115116	0.207992	0.152135	7 x 20		7 p14
1731	ENSG00000242628		0.314806	0.167679	2.78792	0.0115622	0.207992	0.152314	13 x 12		2 p23
1732	ENSG00000213471	TTLL13P	-0.436784	-0.2007	-2.73118	0.0115693	0.207992	0.152339	11 x 32		15 q26	tubulin tyrosine ligase like 13, pseudogene [Source:HGNC Symbol;Acc:HGNC:32484]
1733	ENSG00000165533	TTC8	-0.684986	-0.2982	-2.74986	0.0115789	0.207992	0.152373	7 x 37		14 q31	tetratricopeptide repeat domain 8 [Source:HGNC Symbol;Acc:HGNC:20087]
1734	ENSG00000170442	KRT86	1.46731	0.946135	2.79495	0.0115872	0.207992	0.152402	38 x 13		12 q13	keratin 86 [Source:HGNC Symbol;Acc:HGNC:6463]
1735	ENSG00000260328		0.590985	0.330669	2.91512	0.0116087	0.207992	0.152478	36 x 14		17 p11
1736	ENSG00000175155	YPEL2	-0.828926	-0.34925	-2.74956	0.0116479	0.207992	0.152615	1 x 12	I	17 q22	yippee like 2 [Source:HGNC Symbol;Acc:HGNC:18326]
1737	ENSG00000105497	ZNF175	-0.904536	-0.37445	-2.72902	0.0116584	0.207992	0.152651	5 x 4		19 q13	zinc finger protein 175 [Source:HGNC Symbol;Acc:HGNC:12964]
1738	ENSG00000141497	ZMYND15	0.791273	0.458159	2.75864	0.0116605	0.207992	0.152659	39 x 9	D	17 p13	zinc finger MYND-type containing 15 [Source:HGNC Symbol;Acc:HGNC:20997]
1739	ENSG00000106003	LFNG	-1.33776	-0.497388	-2.77673	0.011693	0.207992	0.152772	21 x 12		7 p22	LFNG O-fucosylpeptide 3-beta-N-acetylglucosaminyltransferase [Source:HGNC Symbol;Acc:HGNC:6560]
1740	ENSG00000146476	ARMT1	-1.37355	-0.50591	-2.72436	0.0117141	0.207992	0.152845	1 x 16	I	6 q25	acidic residue methyltransferase 1 [Source:HGNC Symbol;Acc:HGNC:17872]
1741	ENSG00000223723		1.0447	0.630663	2.7753	0.0117154	0.207992	0.152849	35 x 22	B	X p21
1742	ENSG00000237976		0.664239	0.376392	2.83592	0.0117204	0.207992	0.152867	34 x 33		1 q21
1743	ENSG00000101353	MROH8	-0.681108	-0.296769	-2.777	0.0117215	0.207992	0.15287	4 x 32		20 q11	maestro heat like repeat family member 8 [Source:HGNC Symbol;Acc:HGNC:16125]
1744	ENSG00000130270	ATP8B3	-1.05907	-0.422495	-2.73253	0.0117281	0.207992	0.152893	23 x 10		19 p13	ATPase phospholipid transporting 8B3 [Source:HGNC Symbol;Acc:HGNC:13535]
1745	ENSG00000125746	EML2	-0.811682	-0.343347	-2.73678	0.0117407	0.207992	0.152937	13 x 40		19 q13	echinoderm microtubule associated protein like 2 [Source:HGNC Symbol;Acc:HGNC:18035]
1746	ENSG00000104133	SPG11	-0.508253	-0.230004	-2.73542	0.0117466	0.207992	0.152957	2 x 8	H	15 q21	SPG11, spatacsin vesicle trafficking associated [Source:HGNC Symbol;Acc:HGNC:11226]
1747	ENSG00000255355		0.507073	0.279577	2.7911	0.0117549	0.207992	0.152986	18 x 29		11 q12
1748	ENSG00000234882		0.83049	0.484036	2.75771	0.0117653	0.207992	0.153021	12 x 10		6 q13	eukaryotic translation initiation factor 3 subunit E pseudogene 1 [Source:HGNC Symbol;Acc:HGNC:6102]
1749	ENSG00000231609	LOC100132215	0.902697	0.532464	2.71779	0.0117732	0.207992	0.153049	17 x 24		2 p15
1750	ENSG00000196092	PAX5	1.64995	1.09323	2.87379	0.0117752	0.207992	0.153055	36 x 6		9 p13	paired box 5 [Source:HGNC Symbol;Acc:HGNC:8619]
1751	ENSG00000271384		0.662177	0.375091	2.74509	0.0117764	0.207992	0.15306	13 x 28		9 q22
1752	ENSG00000171246	NPTX1	-0.998666	-0.404268	-2.72251	0.0117786	0.207992	0.153067	14 x 6		17 q25	neuronal pentraxin 1 [Source:HGNC Symbol;Acc:HGNC:7952]
1753	ENSG00000256612	CYP2B7P	-3.46781	-0.570446	-2.71912	0.0117792	0.207992	0.153069	8 x 40	K	19 q13	cytochrome P450 family 2 subfamily B member 7, pseudogene [Source:HGNC Symbol;Acc:HGNC:2616]
1754	ENSG00000131080	EDA2R	-0.835733	-0.351564	-2.73438	0.0118152	0.207992	0.153192	19 x 3	G	X q12	ectodysplasin A2 receptor [Source:HGNC Symbol;Acc:HGNC:17756]
1755	ENSG00000196502	SULT1A1	-1.10178	-0.434952	-2.71674	0.0118212	0.207992	0.153213	8 x 34		16 p11	sulfotransferase family 1A member 1 [Source:HGNC Symbol;Acc:HGNC:11453]
1756	ENSG00000278834		-0.782677	-0.333287	-2.71771	0.0118293	0.207992	0.153241	6 x 34		17 q21
1757	ENSG00000167614	TTYH1	2.6589	2.02285	2.75395	0.0118311	0.207992	0.153247	30 x 25	B	19 q13	tweety family member 1 [Source:HGNC Symbol;Acc:HGNC:13476]
1758	ENSG00000015475	BID	0.668144	0.378859	2.71687	0.011869	0.207992	0.153375	36 x 15		22 q11	BH3 interacting domain death agonist [Source:HGNC Symbol;Acc:HGNC:1050]
1759	ENSG00000270930		-1.41397	-0.515235	-2.76498	0.0118749	0.207992	0.153395	8 x 36		2 q21	GRAM domain containing 4 pseudogene 8 [Source:HGNC Symbol;Acc:HGNC:49143]
1760	ENSG00000164485	IL22RA2	1.41527	0.905412	2.79123	0.0118814	0.207992	0.153418	38 x 9	E	6 q23	interleukin 22 receptor subunit alpha 2 [Source:HGNC Symbol;Acc:HGNC:14901]
1761	ENSG00000104998	IL27RA	1.27809	0.800591	2.85896	0.0118843	0.207992	0.153427	36 x 9		19 p13	interleukin 27 receptor subunit alpha [Source:HGNC Symbol;Acc:HGNC:17290]
1762	ENSG00000185483	ROR1	1.1749	0.724155	2.82123	0.0118927	0.207992	0.153456	10 x 5		1 p31	receptor tyrosine kinase like orphan receptor 1 [Source:HGNC Symbol;Acc:HGNC:10256]
1763	ENSG00000231898		0.318583	0.169808	2.82053	0.0118988	0.207992	0.153476	12 x 18		2 q31
1764	ENSG00000237672		0.442409	0.24114	2.7662	0.011901	0.207992	0.153484	7 x 20		13 q12	KRR1, small subunit processome component homolog pseudogene 1 [Source:HGNC Symbol;Acc:HGNC:39580]
1765	ENSG00000171435	KSR2	-1.3616	-0.503092	-2.7132	0.0119026	0.207992	0.153489	1 x 23		12 q24	kinase suppressor of ras 2 [Source:HGNC Symbol;Acc:HGNC:18610]
1766	ENSG00000254607	LOC101929427	1.41966	0.90883	2.71857	0.0119063	0.207992	0.153502	37 x 20	C	11 q24
1767	ENSG00000167740	CYB5D2	-0.686757	-0.298853	-2.71225	0.0119175	0.207992	0.15354	16 x 40		17 p13	cytochrome b5 domain containing 2 [Source:HGNC Symbol;Acc:HGNC:28471]
1768	ENSG00000243364	EFNA4	0.670888	0.380594	2.73265	0.011924	0.207992	0.153561	34 x 29		1 q21	ephrin A4 [Source:HGNC Symbol;Acc:HGNC:3224]
1769	ENSG00000275342	PRAG1	0.767812	0.442821	2.71218	0.011924	0.207992	0.153562	7 x 5		8 p23	PEAK1 related kinase activating pseudokinase 1 [Source:HGNC Symbol;Acc:HGNC:25438]
1770	ENSG00000159388	BTG2	-0.96777	-0.394671	-2.71146	0.0119384	0.207992	0.15361	1 x 26		1 q32	BTG anti-proliferation factor 2 [Source:HGNC Symbol;Acc:HGNC:1131]
1771	ENSG00000145781	COMMD10	-0.448749	-0.205675	-2.73528	0.011953	0.207992	0.153659	20 x 40		5 q23	COMM domain containing 10 [Source:HGNC Symbol;Acc:HGNC:30201]
1772	ENSG00000215811		-0.846067	-0.35506	-2.72215	0.0119714	0.207992	0.153721	24 x 33		1 q42	butyrophilin like 10 [Source:HGNC Symbol;Acc:HGNC:42540]
1773	ENSG00000151033	LYZL2	-0.85617	-0.358458	-2.71201	0.0119777	0.207992	0.153742	30 x 31		10 p11	lysozyme like 2 [Source:HGNC Symbol;Acc:HGNC:29613]
1774	ENSG00000188001	TPRG1	-2.03795	-0.618843	-2.82423	0.01198	0.207992	0.15375	6 x 40	K	3 q28	tumor protein p63 regulated 1 [Source:HGNC Symbol;Acc:HGNC:24759]
1775	ENSG00000155755	TMEM237	0.664741	0.376709	2.77391	0.0119908	0.207992	0.153786	31 x 22	B	2 q33	transmembrane protein 237 [Source:HGNC Symbol;Acc:HGNC:14432]
1776	ENSG00000166913	YWHAB	-0.449601	-0.206028	-2.71299	0.0119996	0.207992	0.153815	28 x 15		20 q13	tyrosine 3-monooxygenase/tryptophan 5-monooxygenase activation protein beta [Source:HGNC Symbol;Acc:HGNC:12849]
1777	ENSG00000237523	LINC00857	1.02144	0.614309	2.75814	0.0120267	0.207992	0.153905	39 x 15		10 q22	long intergenic non-protein coding RNA 857 [Source:HGNC Symbol;Acc:HGNC:45114]
1778	ENSG00000163395	IGFN1	-0.692208	-0.300857	-2.71469	0.0120315	0.207992	0.153921	11 x 1		1 q32	immunoglobulin-like and fibronectin type III domain containing 1 [Source:HGNC Symbol;Acc:HGNC:24607]
1779	ENSG00000051128	HOMER3	0.784046	0.453423	2.70816	0.0120359	0.207992	0.153936	33 x 28		19 p13	homer scaffolding protein 3 [Source:HGNC Symbol;Acc:HGNC:17514]
1780	ENSG00000113719	ERGIC1	-0.769859	-0.328789	-2.70919	0.0120404	0.207992	0.153951	13 x 39		5 q35	endoplasmic reticulum-golgi intermediate compartment 1 [Source:HGNC Symbol;Acc:HGNC:29205]
1781	ENSG00000151327	FAM177A1	-0.537111	-0.241554	-2.73184	0.0120429	0.207992	0.153959	21 x 40		14 q13	family with sequence similarity 177 member A1 [Source:HGNC Symbol;Acc:HGNC:19829]
1782	ENSG00000129315	CCNT1	-0.556839	-0.249358	-2.70963	0.0120432	0.207992	0.15396	1 x 17		12 q13	cyclin T1 [Source:HGNC Symbol;Acc:HGNC:1599]
1783	ENSG00000169740	ZNF32	0.385861	0.208195	2.76204	0.0120446	0.207992	0.153965	34 x 36		10 q11	zinc finger protein 32 [Source:HGNC Symbol;Acc:HGNC:13095]
1784	ENSG00000232233	LINC02043	0.695992	0.396535	2.79302	0.0120643	0.207992	0.15403	17 x 24		3 q27	long intergenic non-protein coding RNA 2043 [Source:HGNC Symbol;Acc:HGNC:52883]
1785	ENSG00000272931		0.803254	0.466033	2.78405	0.0120696	0.207992	0.154048	32 x 33		1 p22
1786	ENSG00000257696		-0.691251	-0.300506	-2.71452	0.0120739	0.207992	0.154062	9 x 35		12 q23
1787	ENSG00000171446	KRT27	-0.438087	-0.201243	-2.72264	0.0120919	0.207992	0.154121	16 x 10		17 q21	keratin 27 [Source:HGNC Symbol;Acc:HGNC:30841]
1788	ENSG00000170091	HMP19	-1.09513	-0.433037	-2.8072	0.0121017	0.207992	0.154154	4 x 34		5 q35	Neuron-specific protein family member 2 [Source:UniProtKB/Swiss-Prot;Acc:Q9Y328]
1789	ENSG00000247193	LOC439933	0.325035	0.173451	2.74165	0.012119	0.207992	0.154211	33 x 11		4 p14
1790	ENSG00000239900	ADSL	0.567081	0.315975	2.7569	0.0121291	0.207992	0.154244	36 x 31		22 q13	adenylosuccinate lyase [Source:HGNC Symbol;Acc:HGNC:291]
1791	ENSG00000106537	TSPAN13	-1.27525	-0.481903	-2.70523	0.0121361	0.207992	0.154267	7 x 38	K	7 p21	tetraspanin 13 [Source:HGNC Symbol;Acc:HGNC:21643]
1792	ENSG00000047346	FAM214A	-0.916689	-0.378397	-2.72138	0.012146	0.207992	0.1543	9 x 37		15 q21	family with sequence similarity 214 member A [Source:HGNC Symbol;Acc:HGNC:25609]
1793	ENSG00000173715	C11orf80	-0.806996	-0.341733	-2.78174	0.0121498	0.207992	0.154312	26 x 13		11 q13	chromosome 11 open reading frame 80 [Source:HGNC Symbol;Acc:HGNC:26197]
1794	ENSG00000213539		0.429791	0.233735	2.70577	0.0121741	0.207992	0.154391	26 x 37		9 q31	Y-box binding protein 1 pseudogene 6 [Source:HGNC Symbol;Acc:HGNC:42427]
1795	ENSG00000224717		1.02549	0.617152	2.88652	0.0121793	0.207992	0.154408	30 x 25	B	1 q32
1796	ENSG00000141655	TNFRSF11A	1.17404	0.723527	2.70395	0.0122099	0.207992	0.154508	38 x 10	E	18 q21	TNF receptor superfamily member 11a [Source:HGNC Symbol;Acc:HGNC:11908]
1797	ENSG00000141854	MISP3	-1.43113	-0.519096	-2.7197	0.0122288	0.207992	0.15457	12 x 40	K	19 p13	MISP family member 3 [Source:HGNC Symbol;Acc:HGNC:26963]
1798	ENSG00000233354	LINC00028	0.503267	0.277292	2.86211	0.012233	0.207992	0.154583	15 x 12		20 q11	long intergenic non-protein coding RNA 28 [Source:HGNC Symbol;Acc:HGNC:16224]
1799	ENSG00000180532	ZSCAN4	-0.502037	-0.227494	-2.73557	0.01224	0.207992	0.154606	14 x 10		19 q13	zinc finger and SCAN domain containing 4 [Source:HGNC Symbol;Acc:HGNC:23709]
1800	ENSG00000223834		0.446146	0.243339	2.70139	0.0122521	0.207992	0.154645	13 x 12		10 p11
1801	ENSG00000120333	MRPS14	-0.431194	-0.198365	-2.7036	0.0122539	0.207992	0.154651	20 x 40		1 q25	mitochondrial ribosomal protein S14 [Source:HGNC Symbol;Acc:HGNC:14049]
1802	ENSG00000233247		0.551335	0.306357	2.72943	0.0122626	0.207992	0.154679	32 x 21		X p22
1803	ENSG00000102547	CAB39L	-1.01999	-0.410785	-2.70053	0.0122656	0.207992	0.154689	1 x 19		13 q14	calcium binding protein 39 like [Source:HGNC Symbol;Acc:HGNC:20290]
1804	ENSG00000258828		-0.508722	-0.230193	-2.71023	0.0122672	0.207992	0.154694	22 x 38		14 q21	keratin 8 pseudogene 2 [Source:HGNC Symbol;Acc:HGNC:20282]
1805	ENSG00000274281		-0.61958	-0.27367	-2.81001	0.0122764	0.207992	0.154724	24 x 33		15 q14
1806	ENSG00000271420		-0.877973	-0.365724	-2.71193	0.012277	0.207992	0.154726	10 x 32		1 p36
1807	ENSG00000279382		-0.908478	-0.375734	-2.70486	0.0122825	0.207992	0.154743	6 x 25		17 q25
1808	ENSG00000144834	TAGLN3	0.920352	0.544459	2.7313	0.0122962	0.207992	0.154788	31 x 26	B	3 q13	transgelin 3 [Source:HGNC Symbol;Acc:HGNC:29868]
1809	ENSG00000259336		-0.367765	-0.171456	-2.70153	0.0123111	0.207992	0.154835	10 x 15		15 q14
1810	ENSG00000158406	HIST1H4H	-1.40069	-0.512205	-2.71019	0.0123122	0.207992	0.154839	40 x 32	A	6 p22	histone cluster 1 H4 family member h [Source:HGNC Symbol;Acc:HGNC:4788]
1811	ENSG00000196083	IL1RAP	0.665121	0.376949	2.70665	0.0123133	0.207992	0.154843	26 x 6		3 q28	interleukin 1 receptor accessory protein [Source:HGNC Symbol;Acc:HGNC:5995]
1812	ENSG00000205853		0.617158	0.346886	2.69803	0.0123177	0.207992	0.154857	13 x 26		22 q12	RFPL3 antisense [Source:HGNC Symbol;Acc:HGNC:9981]
1813	ENSG00000123353	ORMDL2	-0.67541	-0.294661	-2.70362	0.0123214	0.207992	0.154869	38 x 35		12 q13	ORMDL sphingolipid biosynthesis regulator 2 [Source:HGNC Symbol;Acc:HGNC:16037]
1814	ENSG00000131096	PYY	-1.22709	-0.469457	-2.75059	0.0123229	0.207992	0.154873	4 x 36		17 q21	peptide YY [Source:HGNC Symbol;Acc:HGNC:9748]
1815	ENSG00000121067	SPOP	-0.493424	-0.224005	-2.69784	0.0123248	0.207992	0.15488	20 x 38		17 q21	speckle type BTB/POZ protein [Source:HGNC Symbol;Acc:HGNC:11254]
1816	ENSG00000251768		-0.383987	-0.178413	-2.6998	0.0123278	0.207992	0.154889	9 x 15		6 q22	RNA, 5S ribosomal pseudogene 217 [Source:HGNC Symbol;Acc:HGNC:43117]
1817	ENSG00000232892	LOC101928404	-0.318962	-0.150219	-2.77653	0.0123426	0.207992	0.154937	17 x 33		1 q23
1818	ENSG00000164106	SCRG1	2.08909	1.47349	2.79084	0.0123431	0.207992	0.154938	13 x 5		4 q34	stimulator of chondrogenesis 1 [Source:HGNC Symbol;Acc:HGNC:17036]
1819	ENSG00000048028	USP28	0.644724	0.364109	2.7246	0.0123481	0.207992	0.154954	33 x 15		11 q23	ubiquitin specific peptidase 28 [Source:HGNC Symbol;Acc:HGNC:12625]
1820	ENSG00000144580	CNOT9	0.478444	0.262459	2.69683	0.012349	0.207992	0.154957	31 x 19		2 q35	CCR4-NOT transcription complex subunit 9 [Source:HGNC Symbol;Acc:HGNC:10445]
1821	ENSG00000164125	FAM198B	-1.31419	-0.491638	-2.70462	0.0123518	0.207992	0.154966	2 x 1		4 q32	family with sequence similarity 198 member B [Source:HGNC Symbol;Acc:HGNC:25312]
1822	ENSG00000258818	RNASE4	-0.898156	-0.372367	-2.71601	0.012356	0.207992	0.15498	14 x 33		14 q11	ribonuclease A family member 4 [Source:HGNC Symbol;Acc:HGNC:10047]
1823	ENSG00000162891	IL20	-1.99051	-0.613627	-2.69827	0.0123575	0.207992	0.154984	10 x 37		1 q32	interleukin 20 [Source:HGNC Symbol;Acc:HGNC:6002]
1824	ENSG00000100665	SERPINA4	-0.894037	-0.371017	-2.71997	0.0123728	0.207992	0.155033	7 x 36		14 q32	serpin family A member 4 [Source:HGNC Symbol;Acc:HGNC:8948]
1825	ENSG00000167680	SEMA6B	-1.06111	-0.423098	-2.70651	0.012383	0.207992	0.155066	18 x 6		19 p13	semaphorin 6B [Source:HGNC Symbol;Acc:HGNC:10739]
1826	ENSG00000227634	LINC01714	0.342386	0.183288	2.78286	0.0123896	0.207992	0.155087	35 x 15		1 p36	long intergenic non-protein coding RNA 1714 [Source:HGNC Symbol;Acc:HGNC:52501]
1827	ENSG00000152056	AP1S3	0.739723	0.424599	2.70648	0.0123913	0.207992	0.155092	30 x 17		2 q36	adaptor related protein complex 1 sigma 3 subunit [Source:HGNC Symbol;Acc:HGNC:18971]
1828	ENSG00000225208		-0.807758	-0.341995	-2.79018	0.012419	0.207992	0.15518	7 x 36		10 q24
1829	ENSG00000114999	TTL	0.508398	0.280373	2.73826	0.0124226	0.207992	0.155191	27 x 20		2 q14	tubulin tyrosine ligase [Source:HGNC Symbol;Acc:HGNC:21586]
1830	ENSG00000223695		0.622463	0.350189	2.70608	0.0124236	0.207992	0.155195	18 x 26		22 q12
1831	ENSG00000223760	MED15P9	-0.614579	-0.27176	-2.74843	0.0124271	0.207992	0.155206	27 x 31		2 q21	mediator complex subunit 15 pseudogene 9 [Source:HGNC Symbol;Acc:HGNC:44130]
1832	ENSG00000159212	CLIC6	-2.21788	-0.634641	-2.73383	0.0124424	0.207992	0.155254	8 x 40	K	21 q22	chloride intracellular channel 6 [Source:HGNC Symbol;Acc:HGNC:2065]
1833	ENSG00000218027		0.534786	0.2963	2.69707	0.0124438	0.207992	0.155259	20 x 23		6 p25
1834	ENSG00000218265		0.326891	0.174501	2.69324	0.0124517	0.207992	0.155284	28 x 40		6 p23	ribosomal protein S4X pseudogene 7 [Source:HGNC Symbol;Acc:HGNC:36885]
1835	ENSG00000105514	RAB3D	-0.98002	-0.398498	-2.73331	0.0124527	0.207992	0.155287	1 x 9	I	19 p13	RAB3D, member RAS oncogene family [Source:HGNC Symbol;Acc:HGNC:9779]
1836	ENSG00000167186	COQ7	-0.611414	-0.270549	-2.70394	0.0124635	0.207992	0.155321	6 x 35		16 p12	coenzyme Q7, hydroxylase [Source:HGNC Symbol;Acc:HGNC:2244]
1837	ENSG00000164919	COX6C	-1.44872	-0.522998	-2.70823	0.0124755	0.207992	0.155359	15 x 40		8 q22	cytochrome c oxidase subunit 6C [Source:HGNC Symbol;Acc:HGNC:2285]
1838	ENSG00000224220		0.417703	0.226669	2.70622	0.0124767	0.207992	0.155363	34 x 7		2 p23
1839	ENSG00000268581		0.314572	0.167547	2.77935	0.0124882	0.207992	0.155399	30 x 9		19 q13	sialic acid binding Ig like lectin 18, pseudogene [Source:HGNC Symbol;Acc:HGNC:15491]
1840	ENSG00000155380	SLC16A1	1.41212	0.902963	2.76258	0.0124988	0.207992	0.155432	35 x 24	B	1 p13	solute carrier family 16 member 1 [Source:HGNC Symbol;Acc:HGNC:10922]
1841	ENSG00000165105	RASEF	-0.999371	-0.404485	-2.69429	0.0125052	0.207992	0.155452	9 x 40	K	9 q21	RAS and EF-hand domain containing [Source:HGNC Symbol;Acc:HGNC:26464]
1842	ENSG00000116212	LRRC42	0.539963	0.29944	2.69443	0.0125066	0.207992	0.155457	32 x 16		1 p32	leucine rich repeat containing 42 [Source:HGNC Symbol;Acc:HGNC:28792]
1843	ENSG00000226352		0.403374	0.218331	2.71702	0.012519	0.207992	0.155495	13 x 28		13 q12	PSPC1 antisense RNA 2 [Source:HGNC Symbol;Acc:HGNC:52951]
1844	ENSG00000171551	ECEL1	1.13191	0.692919	2.73636	0.012521	0.207992	0.155502	32 x 25	B	2 q37	endothelin converting enzyme like 1 [Source:HGNC Symbol;Acc:HGNC:3147]
1845	ENSG00000108439	PNPO	-0.73407	-0.316061	-2.69493	0.0125217	0.207992	0.155504	1 x 12	I	17 q21	pyridoxamine 5'-phosphate oxidase [Source:HGNC Symbol;Acc:HGNC:30260]
1846	ENSG00000174307	PHLDA3	-1.12571	-0.441778	-2.72164	0.0125434	0.207992	0.155572	16 x 40		1 q32	pleckstrin homology like domain family A member 3 [Source:HGNC Symbol;Acc:HGNC:8934]
1847	ENSG00000107242	PIP5K1B	1.52244	0.989853	2.77419	0.0125453	0.207992	0.155578	10 x 4		9 q21	phosphatidylinositol-4-phosphate 5-kinase type 1 beta [Source:HGNC Symbol;Acc:HGNC:8995]
1848	ENSG00000196421	C20orf204	-0.815953	-0.344814	-2.71288	0.0125467	0.207992	0.155582	29 x 32		20 q13	chromosome 20 open reading frame 204 [Source:HGNC Symbol;Acc:HGNC:27655]
1849	ENSG00000272746		-0.927204	-0.381788	-2.7381	0.0125529	0.207992	0.155602	13 x 35		18 p11
1850	ENSG00000157303	SUSD3	-1.47944	-0.529663	-2.68974	0.0125547	0.207992	0.155607	11 x 40	K	9 q22	sushi domain containing 3 [Source:HGNC Symbol;Acc:HGNC:28391]
1851	ENSG00000231341		-0.268421	-0.127736	-2.68958	0.0125584	0.207992	0.155619	26 x 12		Y p11	voltage dependent anion channel 1 pseudogene 6 [Source:HGNC Symbol;Acc:HGNC:37481]
1852	ENSG00000179611		0.525661	0.290777	2.69055	0.0125602	0.207992	0.155624	22 x 18		13 q14	diacylglycerol kinase zeta pseudogene 1 [Source:HGNC Symbol;Acc:HGNC:39263]
1853	ENSG00000142687	KIAA0319L	-0.737698	-0.317363	-2.69429	0.0125676	0.207992	0.155647	10 x 36		1 p34	KIAA0319 like [Source:HGNC Symbol;Acc:HGNC:30071]
1854	ENSG00000205837	LINC00487	0.650806	0.367929	2.68844	0.0126202	0.207992	0.155811	16 x 24		2 p25	long intergenic non-protein coding RNA 487 [Source:HGNC Symbol;Acc:HGNC:42947]
1855	ENSG00000144119	C1QL2	1.30573	0.821414	2.70656	0.0126323	0.207992	0.155848	40 x 19	C	2 q14	complement C1q like 2 [Source:HGNC Symbol;Acc:HGNC:24181]
1856	ENSG00000231274	SBK3	-0.415723	-0.191874	-2.68975	0.0126329	0.207992	0.15585	24 x 28		19 q13	SH3 domain binding kinase family member 3 [Source:HGNC Symbol;Acc:HGNC:44121]
1857	ENSG00000136936	XPA	-0.442072	-0.202902	-2.69389	0.0126355	0.207992	0.155858	14 x 36		9 q22	XPA, DNA damage recognition and repair factor [Source:HGNC Symbol;Acc:HGNC:12814]
1858	ENSG00000223764	LOC100130417	-1.77909	-0.585059	-2.73099	0.0126387	0.207992	0.155868	28 x 29		1 p36
1859	ENSG00000106144	CASP2	0.511126	0.282014	2.68712	0.0126476	0.207992	0.155895	27 x 18		7 q34	caspase 2 [Source:HGNC Symbol;Acc:HGNC:1503]
1860	ENSG00000257989		-1.12705	-0.442156	-2.69003	0.012662	0.207992	0.15594	22 x 32		12 q13
1861	ENSG00000101161	PRPF6	-0.713664	-0.308692	-2.72751	0.0126633	0.207992	0.155944	21 x 17		20 q13	pre-mRNA processing factor 6 [Source:HGNC Symbol;Acc:HGNC:15860]
1862	ENSG00000214174	AMZ2P1	-0.666355	-0.291297	-2.69423	0.0126645	0.207992	0.155948	20 x 40		17 q24	archaelysin family metallopeptidase 2 pseudogene 1 [Source:HGNC Symbol;Acc:HGNC:26491]
1863	ENSG00000239445	ST3GAL6-AS1	0.714685	0.408486	2.68555	0.0126748	0.207992	0.155979	36 x 15		3 q12	ST3GAL6 antisense RNA 1 [Source:HGNC Symbol;Acc:HGNC:40828]
1864	ENSG00000143578	CREB3L4	-0.995954	-0.403433	-2.74808	0.0126765	0.207992	0.155985	6 x 35		1 q21	cAMP responsive element binding protein 3 like 4 [Source:HGNC Symbol;Acc:HGNC:18854]
1865	ENSG00000272834		0.297781	0.158117	2.72403	0.0126826	0.207992	0.156003	14 x 21		22 q13
1866	ENSG00000226580		0.510074	0.281381	2.69744	0.0126869	0.207992	0.156017	19 x 25		21 q21	ribosomal protein L39 pseudogene 40 [Source:HGNC Symbol;Acc:HGNC:35823]
1867	ENSG00000233028		-1.16536	-0.45284	-2.68465	0.0127014	0.207992	0.156061	1 x 20		7 p11
1868	ENSG00000228331		0.385728	0.208118	2.75663	0.0127035	0.207992	0.156068	29 x 38		17 p11
1869	ENSG00000227359		-0.487844	-0.221737	-2.74184	0.0127139	0.207992	0.1561	9 x 14		2 q14
1870	ENSG00000144659	SLC25A38	-0.538522	-0.242115	-2.68427	0.0127148	0.207992	0.156102	22 x 40		3 p22	solute carrier family 25 member 38 [Source:HGNC Symbol;Acc:HGNC:26054]
1871	ENSG00000125149	C16orf70	-0.342787	-0.160644	-2.74594	0.012716	0.207992	0.156106	26 x 17		16 q22	chromosome 16 open reading frame 70 [Source:HGNC Symbol;Acc:HGNC:29564]
1872	ENSG00000276855		-0.657562	-0.288016	-2.685	0.0127161	0.207992	0.156106	6 x 35		17 p12
1873	ENSG00000146232	NFKBIE	0.776461	0.448463	2.76186	0.0127168	0.21398	0.156108	37 x 9		6 p21	NFKB inhibitor epsilon [Source:HGNC Symbol;Acc:HGNC:7799]
1874	ENSG00000245904		0.710722	0.405947	2.72679	0.0127337	0.21398	0.156164	20 x 25		12 q21
1875	ENSG00000221571		0.456768	0.249605	2.72265	0.0127444	0.21398	0.1562	16 x 29		1 q41	RNA, U6atac small nuclear 35, pseudogene [Source:HGNC Symbol;Acc:HGNC:46934]
1876	ENSG00000026652	AGPAT4	0.69487	0.395821	2.69648	0.0127901	0.21398	0.156351	16 x 6		6 q26	1-acylglycerol-3-phosphate O-acyltransferase 4 [Source:HGNC Symbol;Acc:HGNC:20885]
1877	ENSG00000130988	RGN	1.42849	0.91571	2.70135	0.0127986	0.21398	0.156379	24 x 25		X p11	regucalcin [Source:HGNC Symbol;Acc:HGNC:9989]
1878	ENSG00000173818	ENDOV	-0.761279	-0.32576	-2.68307	0.0128339	0.21398	0.156495	8 x 32		17 q25	endonuclease V [Source:HGNC Symbol;Acc:HGNC:26640]
1879	ENSG00000196866	HIST1H2AD	-1.25793	-0.477478	-2.68768	0.0128387	0.21398	0.15651	40 x 32	A	6 p22	histone cluster 1 H2A family member d [Source:HGNC Symbol;Acc:HGNC:4729]
1880	ENSG00000228413		0.336666	0.180039	2.67961	0.0128556	0.21398	0.156566	16 x 18		3 q29
1881	ENSG00000185904	LINC00839	1.73287	1.16216	2.75617	0.0128603	0.21398	0.156581	36 x 22	B	10 q11	long intergenic non-protein coding RNA 839 [Source:HGNC Symbol;Acc:HGNC:28269]
1882	ENSG00000159346	ADIPOR1	-0.693707	-0.301408	-2.68139	0.0128626	0.21398	0.156588	29 x 14		1 q32	adiponectin receptor 1 [Source:HGNC Symbol;Acc:HGNC:24040]
1883	ENSG00000101745	ANKRD12	-0.386089	-0.179311	-2.70965	0.0128714	0.21398	0.156617	4 x 18		18 p11	ankyrin repeat domain 12 [Source:HGNC Symbol;Acc:HGNC:29135]
1884	ENSG00000104365	IKBKB	-0.689688	-0.299931	-2.74201	0.0128802	0.21398	0.156646	10 x 35		8 p11	inhibitor of nuclear factor kappa B kinase subunit beta [Source:HGNC Symbol;Acc:HGNC:5960]
1885	ENSG00000274093		-0.349224	-0.163442	-2.79348	0.0128806	0.21398	0.156647	12 x 18		16 q22
1886	ENSG00000220205	VAMP2	-0.391177	-0.18148	-2.6843	0.012884	0.21398	0.156658	7 x 32		17 p13	vesicle associated membrane protein 2 [Source:HGNC Symbol;Acc:HGNC:12643]
1887	ENSG00000179454	KLHL28	-0.571962	-0.255288	-2.68865	0.0129332	0.21398	0.156818	3 x 15		14 q21	kelch like family member 28 [Source:HGNC Symbol;Acc:HGNC:19741]
1888	ENSG00000260266	LOC729739	0.401163	0.217048	2.67667	0.0129527	0.21398	0.156881	22 x 27		15 q24
1889	ENSG00000101019	UQCC1	-0.480374	-0.218691	-2.67668	0.0129815	0.21398	0.156974	27 x 33		20 q11	ubiquinol-cytochrome c reductase complex assembly factor 1 [Source:HGNC Symbol;Acc:HGNC:15891]
1890	ENSG00000176108	CHMP6	-0.64894	-0.284784	-2.67606	0.0129868	0.21398	0.156991	21 x 13		17 q25	charged multivesicular body protein 6 [Source:HGNC Symbol;Acc:HGNC:25675]
1891	ENSG00000184523		-0.6713	-0.293136	-2.69431	0.0130042	0.21398	0.157047	3 x 19		9 q13	prostaglandin E receptor 4 pseudogene 2 [Source:HGNC Symbol;Acc:HGNC:9598]
1892	ENSG00000164172	MOCS2	-0.571616	-0.255153	-2.68836	0.0130049	0.21398	0.157049	20 x 40		5 q11	molybdenum cofactor synthesis 2 [Source:HGNC Symbol;Acc:HGNC:7193]
1893	ENSG00000163393	SLC22A15	-0.96515	-0.393849	-2.69522	0.0130132	0.21398	0.157076	1 x 14	I	1 p13	solute carrier family 22 member 15 [Source:HGNC Symbol;Acc:HGNC:20301]
1894	ENSG00000188501	LCTL	1.04514	0.630974	2.87321	0.0130133	0.21398	0.157076	31 x 20		15 q22	lactase like [Source:HGNC Symbol;Acc:HGNC:15583]
1895	ENSG00000091482	SMPX	1.03419	0.62326	2.82196	0.01303	0.21398	0.15713	37 x 18		X p22	small muscle protein, X-linked [Source:HGNC Symbol;Acc:HGNC:11122]
1896	ENSG00000244676		0.913785	0.539991	2.8425	0.0130363	0.21398	0.15715	18 x 24		21 q21
1897	ENSG00000277010		-1.30695	-0.489851	-2.80195	0.0130383	0.21398	0.157157	9 x 35		16 p13
1898	ENSG00000170390	DCLK2	0.732716	0.420078	2.67402	0.013053	0.21398	0.157204	17 x 23		4 q31	doublecortin like kinase 2 [Source:HGNC Symbol;Acc:HGNC:19002]
1899	ENSG00000271396		-0.500434	-0.226846	-2.67297	0.0130543	0.21398	0.157208	9 x 16		15 q26
1900	ENSG00000229367		0.457872	0.250257	2.80577	0.0130612	0.21398	0.157229	24 x 36		1 q42	high mobility group nucleosomal binding domain 2 pseudogene 19 [Source:HGNC Symbol;Acc:HGNC:39383]
1901	ENSG00000154237	LRRK1	0.75906	0.437127	2.67338	0.0130807	0.21398	0.157292	9 x 7		15 q26	leucine rich repeat kinase 1 [Source:HGNC Symbol;Acc:HGNC:18608]
1902	ENSG00000134287	ARF3	-0.669122	-0.292327	-2.68307	0.0130853	0.21398	0.157306	25 x 13		12 q13	ADP ribosylation factor 3 [Source:HGNC Symbol;Acc:HGNC:654]
1903	ENSG00000260954		-0.476502	-0.217108	-2.67463	0.0130938	0.21398	0.157334	9 x 16		16 p13
1904	ENSG00000048052	HDAC9	1.25792	0.785483	2.77431	0.0130952	0.21398	0.157338	35 x 11		7 p21	histone deacetylase 9 [Source:HGNC Symbol;Acc:HGNC:14065]
1905	ENSG00000204219	TCEA3	-1.11623	-0.439088	-2.69789	0.0131023	0.21398	0.157361	12 x 39		1 p36	transcription elongation factor A3 [Source:HGNC Symbol;Acc:HGNC:11615]
1906	ENSG00000152953	STK32B	-1.92793	-0.606077	-2.67859	0.0131057	0.21398	0.157371	2 x 1		4 p16	serine/threonine kinase 32B [Source:HGNC Symbol;Acc:HGNC:14217]
1907	ENSG00000270499		0.302299	0.16065	2.67078	0.0131143	0.21398	0.157399	14 x 16		X p11	marker of proliferation Ki-67 pseudogene 1 [Source:HGNC Symbol;Acc:HGNC:49230]
1908	ENSG00000020129	NCDN	-0.622947	-0.274953	-2.6875	0.0131196	0.21398	0.157415	21 x 16		1 p34	neurochondrin [Source:HGNC Symbol;Acc:HGNC:17597]
1909	ENSG00000181019	NQO1	-1.26596	-0.479539	-2.67079	0.0131207	0.21398	0.157419	12 x 39		16 q22	NAD(P)H quinone dehydrogenase 1 [Source:HGNC Symbol;Acc:HGNC:2874]
1910	ENSG00000124795	DEK	0.981851	0.586718	2.6757	0.0131295	0.21398	0.157447	37 x 25	C	6 p22	DEK proto-oncogene [Source:HGNC Symbol;Acc:HGNC:2768]
1911	ENSG00000233765		0.568632	0.316925	2.73864	0.0131321	0.21398	0.157455	18 x 28		9 q21
1912	ENSG00000249626		0.798604	0.462973	2.69064	0.0131327	0.21398	0.157457	10 x 26		3 q29
1913	ENSG00000261804	LOC102723373	-1.25065	-0.475601	-2.68893	0.0131348	0.21398	0.157464	9 x 37		16 q12
1914	ENSG00000267934		-0.852745	-0.357309	-2.6967	0.0131354	0.21398	0.157466	5 x 26		19 p12
1915	ENSG00000114770	ABCC5	-1.12402	-0.4413	-2.6774	0.0131703	0.21398	0.157576	4 x 21		3 q27	ATP binding cassette subfamily C member 5 [Source:HGNC Symbol;Acc:HGNC:56]
1916	ENSG00000268234		-0.303436	-0.143365	-2.67868	0.0131815	0.21398	0.157611	23 x 37		9 p11	FK506 binding protein 4 pseudogene 6 [Source:HGNC Symbol;Acc:HGNC:50375]
1917	ENSG00000165219	GAPVD1	-0.39654	-0.183761	-2.68029	0.0131826	0.21398	0.157615	1 x 10	I	9 q33	GTPase activating protein and VPS9 domains 1 [Source:HGNC Symbol;Acc:HGNC:23375]
1918	ENSG00000008735	MAPK8IP2	-1.98914	-0.61347	-2.81713	0.0132062	0.21398	0.157689	14 x 40		22 q13	mitogen-activated protein kinase 8 interacting protein 2 [Source:HGNC Symbol;Acc:HGNC:6883]
1919	ENSG00000258592		-0.638133	-0.280713	-2.70672	0.0132209	0.21398	0.157735	26 x 30		14 q22
1920	ENSG00000259075	POC1B-GALNT4	-0.328287	-0.154312	-2.69086	0.013232	0.21398	0.15777	7 x 13		12 q21	POC1B-GALNT4 readthrough [Source:HGNC Symbol;Acc:HGNC:42957]
1921	ENSG00000123609	NMI	0.787807	0.455887	2.67307	0.0132375	0.21398	0.157787	40 x 8	D	2 q23	N-myc and STAT interactor [Source:HGNC Symbol;Acc:HGNC:7854]
1922	ENSG00000136943	CTSV	1.47499	0.952192	2.68768	0.0132442	0.21398	0.157808	40 x 23	C	9 q22	cathepsin V [Source:HGNC Symbol;Acc:HGNC:2538]
1923	ENSG00000196177	ACADSB	-1.1735	-0.455074	-2.68299	0.0132557	0.21398	0.157844	8 x 38	K	10 q26	acyl-CoA dehydrogenase, short/branched chain [Source:HGNC Symbol;Acc:HGNC:91]
1924	ENSG00000261061		0.903146	0.532769	2.68947	0.0132704	0.21398	0.15789	40 x 28	A	16 q23
1925	ENSG00000174456	C12orf76	-0.459058	-0.209939	-2.68327	0.0132859	0.21398	0.157938	4 x 32		12 q24	chromosome 12 open reading frame 76 [Source:HGNC Symbol;Acc:HGNC:33790]
1926	ENSG00000268949		0.662896	0.375544	2.71906	0.0133125	0.21398	0.158021	32 x 30		1 p34	mitochondrial ribosomal protein S17 pseudogene 1 [Source:HGNC Symbol;Acc:HGNC:29734]
1927	ENSG00000046653	GPM6B	1.23857	0.771068	2.66711	0.0133149	0.21398	0.158028	35 x 21	B	X p22	glycoprotein M6B [Source:HGNC Symbol;Acc:HGNC:4461]
1928	ENSG00000259248		-0.663503	-0.290235	-2.66882	0.0133217	0.21398	0.158049	9 x 33		15 q22	USP3 antisense RNA 1 [Source:HGNC Symbol;Acc:HGNC:44140]
1929	ENSG00000211899		2.0925	1.47659	2.67363	0.0133288	0.21398	0.158071	40 x 1	E	14 q32	immunoglobulin heavy constant mu [Source:HGNC Symbol;Acc:HGNC:5541]
1930	ENSG00000146809	ASB15	-0.66724	-0.291627	-2.75998	0.01333	0.21398	0.158075	14 x 35		7 q31	ankyrin repeat and SOCS box containing 15 [Source:HGNC Symbol;Acc:HGNC:19767]
1931	ENSG00000260971		0.493089	0.271196	2.68647	0.0133351	0.21398	0.158091	34 x 19		1 p32
1932	ENSG00000248905	FMN1	-0.822073	-0.346911	-2.67041	0.0133408	0.21398	0.158108	1 x 6	H	15 q13	formin 1 [Source:HGNC Symbol;Acc:HGNC:3768]
1933	ENSG00000176058	TPRN	-0.920203	-0.379533	-2.67324	0.0133546	0.21398	0.158151	13 x 40		9 q34	taperin [Source:HGNC Symbol;Acc:HGNC:26894]
1934	ENSG00000232482		-0.307768	-0.145282	-2.66502	0.0133573	0.21398	0.158159	9 x 19		1 p36
1935	ENSG00000112531	QKI	0.602221	0.337615	2.68884	0.0133708	0.21398	0.158201	29 x 7		6 q26	QKI, KH domain containing RNA binding [Source:HGNC Symbol;Acc:HGNC:21100]
1936	ENSG00000197147	LRRC8B	0.723805	0.414341	2.66791	0.0133812	0.21398	0.158233	29 x 18		1 p22	leucine rich repeat containing 8 family member B [Source:HGNC Symbol;Acc:HGNC:30692]
1937	ENSG00000170011	MYRIP	-1.18406	-0.457953	-2.66846	0.0133835	0.21398	0.15824	8 x 38	K	3 p22	myosin VIIA and Rab interacting protein [Source:HGNC Symbol;Acc:HGNC:19156]
1938	ENSG00000269516		-1.3404	-0.498025	-2.67341	0.0133898	0.21398	0.15826	2 x 25		19 p13	cytochrome P450 family 4 subfamily F member 23, pseudogene [Source:HGNC Symbol;Acc:HGNC:39944]
1939	ENSG00000163121	NEURL3	1.35544	0.859246	2.76034	0.0133937	0.21398	0.158272	37 x 8		2 q11	neuralized E3 ubiquitin protein ligase 3 [Source:HGNC Symbol;Acc:HGNC:25162]
1940	ENSG00000104332	SFRP1	1.92807	1.32971	2.69587	0.0133942	0.21398	0.158273	13 x 1		8 p11	secreted frizzled related protein 1 [Source:HGNC Symbol;Acc:HGNC:10776]
1941	ENSG00000186973	FAM183A	-1.11099	-0.437593	-2.67258	0.0134099	0.21398	0.158322	1 x 40		1 p34	family with sequence similarity 183 member A [Source:HGNC Symbol;Acc:HGNC:34347]
1942	ENSG00000127252	HRASLS	1.51999	0.987901	2.6612	0.0134116	0.21398	0.158327	39 x 22	C	3 q29	HRAS like suppressor [Source:HGNC Symbol;Acc:HGNC:14922]
1943	ENSG00000275234		-0.825286	-0.348008	-2.66047	0.0134299	0.21398	0.158383	12 x 35		19 p13
1944	ENSG00000161798	AQP5	3.05335	2.44016	2.67914	0.0134573	0.21398	0.158467	40 x 19	C	12 q13	aquaporin 5 [Source:HGNC Symbol;Acc:HGNC:638]
1945	ENSG00000163734	CXCL3	1.18636	0.732538	2.67738	0.0134636	0.21398	0.158486	40 x 11	D	4 q13	C-X-C motif chemokine ligand 3 [Source:HGNC Symbol;Acc:HGNC:4604]
1946	ENSG00000123349	PFDN5	-0.498278	-0.225973	-2.66047	0.0134788	0.21398	0.158532	34 x 40		12 q13	prefoldin subunit 5 [Source:HGNC Symbol;Acc:HGNC:8869]
1947	ENSG00000198010	DLGAP2	-0.433726	-0.199423	-2.66792	0.0135178	0.21398	0.158651	13 x 7		8 p23	DLG associated protein 2 [Source:HGNC Symbol;Acc:HGNC:2906]
1948	ENSG00000141580	WDR45B	-0.583622	-0.25983	-2.66262	0.013526	0.21398	0.158676	27 x 14		17 q25	WD repeat domain 45B [Source:HGNC Symbol;Acc:HGNC:25072]
1949	ENSG00000249738	LOC285626	0.517629	0.285929	2.72011	0.0135345	0.21398	0.158702	19 x 30		5 q33
1950	ENSG00000214988		-0.742042	-0.318918	-2.72625	0.0135496	0.21398	0.158747	13 x 33		4 q21	ribosomal protein L7a pseudogene 26 [Source:HGNC Symbol;Acc:HGNC:36815]
1951	ENSG00000157927	RADIL	-1.02505	-0.412316	-2.67174	0.0135625	0.21398	0.158786	29 x 28		7 p22	Rap associating with DIL domain [Source:HGNC Symbol;Acc:HGNC:22226]
1952	ENSG00000101138	CSTF1	-0.505462	-0.228878	-2.68592	0.0135675	0.21398	0.158801	28 x 16		20 q13	cleavage stimulation factor subunit 1 [Source:HGNC Symbol;Acc:HGNC:2483]
1953	ENSG00000246174	KCTD21-AS1	0.733566	0.420626	2.7078	0.0135747	0.21398	0.158823	30 x 33		11 q14	KCTD21 antisense RNA 1 [Source:HGNC Symbol;Acc:HGNC:48674]
1954	ENSG00000141052	MYOCD	-0.699486	-0.303525	-2.65867	0.0135771	0.21398	0.15883	12 x 1		17 p12	myocardin [Source:HGNC Symbol;Acc:HGNC:16067]
1955	ENSG00000260118		0.825583	0.480782	2.65776	0.0135783	0.21398	0.158834	14 x 27		X q12
1956	ENSG00000170471	RALGAPB	-0.664213	-0.290499	-2.65697	0.0135823	0.21398	0.158846	1 x 9	I	20 q11	Ral GTPase activating protein non-catalytic beta subunit [Source:HGNC Symbol;Acc:HGNC:29221]
1957	ENSG00000169508	GPR183	1.0262	0.617647	2.68743	0.013591	0.21398	0.158872	36 x 1	F	13 q32	G protein-coupled receptor 183 [Source:HGNC Symbol;Acc:HGNC:3128]
1958	ENSG00000135390	ATP5G2	-0.564613	-0.252412	-2.67346	0.0136006	0.21398	0.158901	35 x 40		12 q13	ATP synthase, H+ transporting, mitochondrial Fo complex subunit C2 (subunit 9) [Source:HGNC Symbol;Acc:HGNC:842]
1959	ENSG00000232295		0.816015	0.47445	2.66789	0.0136081	0.21398	0.158923	12 x 24		6 q13
1960	ENSG00000166106	ADAMTS15	-2.22433	-0.63509	-2.65566	0.0136355	0.21398	0.159006	4 x 4	H	11 q24	ADAM metallopeptidase with thrombospondin type 1 motif 15 [Source:HGNC Symbol;Acc:HGNC:16305]
1961	ENSG00000164920	OSR2	-1.45457	-0.524281	-2.65874	0.0136386	0.21398	0.159015	20 x 6		8 q22	odd-skipped related transciption factor 2 [Source:HGNC Symbol;Acc:HGNC:15830]
1962	ENSG00000232300		-0.315117	-0.148526	-2.67161	0.013649	0.21398	0.159046	11 x 20		17 q21	family with sequence similarity 215 member B (non-protein coding) [Source:HGNC Symbol;Acc:HGNC:43639]
1963	ENSG00000263089		-0.766509	-0.327608	-2.65418	0.0136503	0.21398	0.15905	7 x 20		17 q22
1964	ENSG00000176842	IRX5	-0.940946	-0.386189	-2.65867	0.0136547	0.21398	0.159063	13 x 40		16 q12	iroquois homeobox 5 [Source:HGNC Symbol;Acc:HGNC:14361]
1965	ENSG00000158158	CNNM4	-0.721114	-0.311392	-2.69466	0.0136588	0.21398	0.159075	1 x 8	H	2 q11	cyclin and CBS domain divalent metal cation transport mediator 4 [Source:HGNC Symbol;Acc:HGNC:105]
1966	ENSG00000011201	ANOS1	-1.26202	-0.478529	-2.66184	0.0136641	0.21398	0.159091	2 x 3	H	X p22	anosmin 1 [Source:HGNC Symbol;Acc:HGNC:6211]
1967	ENSG00000163739	CXCL1	1.58628	1.04121	2.6784	0.0136698	0.21398	0.159108	40 x 11	D	4 q13	C-X-C motif chemokine ligand 1 [Source:HGNC Symbol;Acc:HGNC:4602]
1968	ENSG00000198855	FICD	-0.536146	-0.241171	-2.65248	0.0136852	0.21398	0.159154	1 x 12	I	12 q23	FIC domain containing [Source:HGNC Symbol;Acc:HGNC:18416]
1969	ENSG00000244687	UBE2V1	-0.364875	-0.170211	-2.6784	0.013692	0.21398	0.159175	26 x 17		20 q13	ubiquitin conjugating enzyme E2 V1 [Source:HGNC Symbol;Acc:HGNC:12494]
1970	ENSG00000103479	RBL2	-0.69762	-0.302842	-2.6543	0.0136952	0.21398	0.159184	1 x 9	I	16 q12	RB transcriptional corepressor like 2 [Source:HGNC Symbol;Acc:HGNC:9894]
1971	ENSG00000280327		-0.621607	-0.274443	-2.6519	0.0136985	0.21398	0.159194	9 x 34		16 p13
1972	ENSG00000139613	SMARCC2	-0.455323	-0.208396	-2.65182	0.0137013	0.21398	0.159202	2 x 8	H	12 q13	SWI/SNF related, matrix associated, actin dependent regulator of chromatin subfamily c member 2 [Source:HGNC Symbol;Acc:HGNC:11105]
1973	ENSG00000130234	ACE2	1.5595	1.01957	2.65183	0.0137051	0.21398	0.159214	40 x 10	D	X p22	angiotensin I converting enzyme 2 [Source:HGNC Symbol;Acc:HGNC:13557]
1974	ENSG00000172824	CES4A	-0.958342	-0.391706	-2.65142	0.0137125	0.21398	0.159236	6 x 29		16 q22	carboxylesterase 4A [Source:HGNC Symbol;Acc:HGNC:26741]
1975	ENSG00000268734		0.625133	0.351853	2.65515	0.0137213	0.21398	0.159262	30 x 6		19 q13
1976	ENSG00000241163	LINC00877	0.542996	0.301282	2.75542	0.0137227	0.21398	0.159266	15 x 10		3 p13	long intergenic non-protein coding RNA 877 [Source:HGNC Symbol;Acc:HGNC:27706]
1977	ENSG00000254872		-0.649937	-0.285159	-2.69079	0.0137298	0.21398	0.159287	17 x 19		11 p15
1978	ENSG00000124097		0.861478	0.504695	2.66603	0.0137365	0.21398	0.159307	34 x 27	B	20 q13	high mobility group box 1 pseudogene 1 [Source:HGNC Symbol;Acc:HGNC:4993]
1979	ENSG00000280334		-0.787743	-0.335056	-2.66358	0.0137481	0.21398	0.159341	5 x 25		16 q22
1980	ENSG00000227071		0.324546	0.173175	2.65023	0.0137505	0.21398	0.159348	18 x 32		9 p21	FOCAD antisense RNA 1 [Source:HGNC Symbol;Acc:HGNC:49789]
1981	ENSG00000243592		0.369565	0.198816	2.67126	0.0137519	0.21398	0.159352	29 x 38		5 q11
1982	ENSG00000185033	SEMA4B	-0.867491	-0.362242	-2.65484	0.0137573	0.21398	0.159368	9 x 37		15 q26	semaphorin 4B [Source:HGNC Symbol;Acc:HGNC:10730]
1983	ENSG00000227766		1.74867	1.17545	2.65111	0.0137758	0.21398	0.159423	40 x 7	E	6 p22
1984	ENSG00000267457		0.290345	0.153959	2.72441	0.0137761	0.21398	0.159424	14 x 18		17 q12
1985	ENSG00000248794		-0.541392	-0.243254	-2.65879	0.0137786	0.21398	0.159431	14 x 33		5 q14
1986	ENSG00000275765		-0.781652	-0.332928	-2.65019	0.013781	0.21398	0.159438	18 x 40		5 q33
1987	ENSG00000229853		-0.321465	-0.151319	-2.652	0.0137929	0.21398	0.159473	12 x 16		20 q13
1988	ENSG00000136944	LMX1B	-1.75615	-0.581436	-2.66938	0.0138013	0.21398	0.159498	1 x 2	H	9 q33	LIM homeobox transcription factor 1 beta [Source:HGNC Symbol;Acc:HGNC:6654]
[truncated: 30,051 more rows]

## Sheet: BC_gBRCA1.vs.BC_noBRCA
Sample Summary:
%DE:;;0.4
#genes with fdr < 0.2;;6288
#genes with fdr < 0.1;;3738
#genes with fdr < 0.05;;1985
#genes with fdr < 0.01;;683
<FC> = 0
<t-score> = -0.17
<p-value> = 0
<fdr> = 0.6
Gene Statistics
Rank	ID	Symbol	logFC	WAD	T.Score	p.value	fdr	Fdr	Metagene	Spot	Chromosome	Description
1	ENSG00000170893	TRH	-1.33729	-0.473696	-11.4961	0	8.47001e-12	0	1 x 35		3 q22	thyrotropin releasing hormone [Source:HGNC Symbol;Acc:HGNC:12298]
2	ENSG00000171798	KNDC1	-1.62033	-0.523916	-14.0989	0	8.47001e-12	0	10 x 40	K	10 q26	kinase non-catalytic C-lobe domain containing 1 [Source:HGNC Symbol;Acc:HGNC:29374]
3	ENSG00000250874		-0.478469	-0.214319	-9.92837	4.44089e-16	4.23501e-11	2.82334e-12	26 x 31		5 q14
4	ENSG00000171811	CFAP46	-1.81093	-0.547883	-16.0198	2.66454e-15	1.05875e-10	1.2705e-11	1 x 40		10 q26	cilia and flagella associated protein 46 [Source:HGNC Symbol;Acc:HGNC:25247]
5	ENSG00000259447		-0.499985	-0.222783	-12.4198	8.21565e-15	6.79718e-10	3.1339e-11	9 x 34		15 q14
6	ENSG00000204195	AWAT1	-0.519122	-0.230226	-11.0568	6.9722e-14	6.79718e-10	1.97713e-10	21 x 34		X q13	acyl-CoA wax alcohol acyltransferase 1 [Source:HGNC Symbol;Acc:HGNC:23252]
7	ENSG00000198062	POTEH	-0.625584	-0.270174	-13.6953	7.9492e-14	7.3435e-09	2.1659e-10	7 x 35		22 q11	POTE ankyrin domain family member H [Source:HGNC Symbol;Acc:HGNC:133]
8	ENSG00000224294	PINCR	-0.370175	-0.170186	-8.35402	9.20153e-13	7.3435e-09	1.91104e-09	23 x 34		X p11	p53-induced noncoding RNA [Source:HGNC Symbol;Acc:HGNC:53590]
9	ENSG00000196834	POTEI	-1.26729	-0.45858	-12.9327	9.28813e-13	7.3435e-09	1.92432e-09	14 x 36		2 q21	POTE ankyrin domain family member I [Source:HGNC Symbol;Acc:HGNC:37093]
10	ENSG00000260710		-2.01028	-0.564469	-15.4815	1.42553e-12	7.3435e-09	2.5904e-09	8 x 39	K	16 p13
11	ENSG00000204658		-0.354239	-0.163475	-9.32675	1.9944e-12	7.3435e-09	3.17692e-09	4 x 33		20 p11	cystatin 9-like pseudogene 2 [Source:HGNC Symbol;Acc:HGNC:44337]
12	ENSG00000230115	TPRG1-AS2	-0.683782	-0.290967	-12.6773	2.4718e-12	7.3435e-09	3.5679e-09	10 x 35		3 q28	TPRG1 antisense RNA 2 [Source:HGNC Symbol;Acc:HGNC:41062]
13	ENSG00000260284		-1.74007	-0.539899	-13.0833	2.71383e-12	7.3435e-09	3.73937e-09	8 x 36		16 p13	tryptase pseudogene 2 [Source:HGNC Symbol;Acc:HGNC:14136]
14	ENSG00000229262		-0.409607	-0.186552	-12.6161	2.77467e-12	3.58855e-07	3.78004e-09	17 x 36		20 p11
15	ENSG00000251191	LINC00589	-0.838307	-0.342587	-11.1344	2.38183e-11	3.58855e-07	3.00481e-08	10 x 36		8 p12	long intergenic non-protein coding RNA 589 [Source:HGNC Symbol;Acc:HGNC:32299]
16	ENSG00000237574	LINC01856	-0.698541	-0.296122	-10.6058	5.31051e-11	3.58855e-07	6.07412e-08	8 x 35		2 q21	long intergenic non-protein coding RNA 1856 [Source:HGNC Symbol;Acc:HGNC:52672]
17	ENSG00000170367	CST5	-1.56406	-0.515325	-9.63385	5.92197e-11	1.10794e-06	6.64403e-08	6 x 40	K	20 p11	cystatin D [Source:HGNC Symbol;Acc:HGNC:2477]
18	ENSG00000224715	LOC339685	-0.885389	-0.357279	-10.4876	1.1731e-10	1.66569e-06	1.24301e-07	9 x 36		22 q13
19	ENSG00000249599		-1.51169	-0.506707	-10.2257	2.58412e-10	1.66569e-06	2.5126e-07	18 x 40		4 q22	BMPR1B antisense RNA 1 (head to head) [Source:HGNC Symbol;Acc:HGNC:50864]
20	ENSG00000260469		-0.599522	-0.260624	-9.01079	3.17522e-10	1.66569e-06	2.98436e-07	28 x 29		15 q24	C15orf59 antisense RNA 1 [Source:HGNC Symbol;Acc:HGNC:51422]
21	ENSG00000225208		-1.27473	-0.460237	-11.6145	3.7931e-10	2.18873e-06	3.445e-07	7 x 36		10 q24
22	ENSG00000162989	KCNJ3	-3.30071	-0.462074	-10.9946	6.35221e-10	2.18873e-06	5.21541e-07	6 x 35		2 q24	potassium voltage-gated channel subfamily J member 3 [Source:HGNC Symbol;Acc:HGNC:6264]
23	ENSG00000205022	PABPN1L	-0.373849	-0.171725	-10.0689	6.36721e-10	2.18873e-06	5.22479e-07	17 x 15		16 q24	poly(A) binding protein nuclear 1 like, cytoplasmic [Source:HGNC Symbol;Acc:HGNC:37237]
24	ENSG00000106927	AMBP	-1.46225	-0.498024	-11.1809	8.70468e-10	2.18873e-06	6.56734e-07	7 x 36		9 q32	alpha-1-microglobulin/bikunin precursor [Source:HGNC Symbol;Acc:HGNC:453]
25	ENSG00000198889	DCAF12L1	-0.316112	-0.147195	-6.79341	9.24054e-10	2.18873e-06	6.84519e-07	23 x 29		X q25	DDB1 and CUL4 associated factor 12 like 1 [Source:HGNC Symbol;Acc:HGNC:29395]
26	ENSG00000218357	LINC01644	-1.63248	-0.525679	-10.9355	9.53095e-10	2.75042e-06	6.9916e-07	8 x 37		22 q13	long intergenic non-protein coding RNA 1644 [Source:HGNC Symbol;Acc:HGNC:52431]
27	ENSG00000279932		-0.299548	-0.140023	-9.53656	1.17712e-09	2.75042e-06	8.14812e-07	13 x 34		8 p22
28	ENSG00000215262	KCNU1	-0.609453	-0.26428	-9.05097	1.49349e-09	2.75042e-06	9.57564e-07	20 x 34		8 p11	potassium calcium-activated channel subfamily U member 1 [Source:HGNC Symbol;Acc:HGNC:18867]
29	ENSG00000204529		-0.283295	-0.132929	-8.29432	1.5401e-09	2.75042e-06	9.76836e-07	16 x 15		11 q13	guanylate cyclase 2E, pseudogene [Source:HGNC Symbol;Acc:HGNC:4690]
30	ENSG00000254080		-0.857116	-0.348515	-8.26363	1.57074e-09	2.75042e-06	9.89277e-07	5 x 35		8 q21
31	ENSG00000124831	LRRFIP1	-0.812208	-0.334234	-13.3011	1.81869e-09	2.75042e-06	1.0839e-06	2 x 13	I	2 q37	LRR binding FLII interacting protein 1 [Source:HGNC Symbol;Acc:HGNC:6702]
32	ENSG00000237487		-0.878595	-0.355189	-10.4059	1.92378e-09	2.75042e-06	1.12101e-06	10 x 35		9 p13	vomeronasal 1 receptor 48 pseudogene [Source:HGNC Symbol;Acc:HGNC:37368]
33	ENSG00000277022		-0.974672	-0.383813	-10.917	2.04007e-09	2.75042e-06	1.16018e-06	2 x 21		20 q13
34	ENSG00000251141		-2.50608	-0.568115	-10.3587	2.19061e-09	2.75042e-06	1.20819e-06	5 x 33		5 p12
35	ENSG00000170099	SERPINA6	-2.43949	-0.570743	-9.47191	2.25096e-09	3.38619e-06	1.22663e-06	1 x 38		14 q32	serpin family A member 6 [Source:HGNC Symbol;Acc:HGNC:1540]
36	ENSG00000204434		-2.97981	-0.521484	-11.9746	2.4285e-09	5.33778e-06	1.28662e-06	9 x 36		2 q21	POTE ankyrin domain family member K, pseudogene [Source:HGNC Symbol;Acc:HGNC:30182]
37	ENSG00000188001	TPRG1	-2.59953	-0.562793	-11.3534	2.78368e-09	5.33778e-06	1.42457e-06	6 x 40	K	3 q28	tumor protein p63 regulated 1 [Source:HGNC Symbol;Acc:HGNC:24759]
38	ENSG00000173335	CST9	-2.21797	-0.572525	-9.59999	2.99821e-09	5.33778e-06	1.50344e-06	5 x 37		20 p11	cystatin 9 [Source:HGNC Symbol;Acc:HGNC:13261]
39	ENSG00000253154		-1.83769	-0.550613	-10.1353	3.28881e-09	5.33778e-06	1.60533e-06	8 x 36		8 q21
40	ENSG00000152086	TUBA3E	-1.45235	-0.49622	-10.2932	3.54795e-09	7.83945e-06	1.69173e-06	6 x 39	K	2 q21	tubulin alpha 3e [Source:HGNC Symbol;Acc:HGNC:20765]
41	ENSG00000124237	C20orf85	-0.861507	-0.349887	-7.88489	4.04823e-09	7.83945e-06	1.87327e-06	1 x 40		20 q13	chromosome 20 open reading frame 85 [Source:HGNC Symbol;Acc:HGNC:16216]
42	ENSG00000261226		-0.865958	-0.351274	-10.666	4.37001e-09	1.10253e-05	1.98448e-06	17 x 15		16 q24
43	ENSG00000183206	POTEC	-0.822613	-0.337582	-7.75508	5.02344e-09	1.10253e-05	2.22143e-06	1 x 20		18 p11	POTE ankyrin domain family member C [Source:HGNC Symbol;Acc:HGNC:33894]
44	ENSG00000265369	PCAT18	-1.81041	-0.547829	-9.81867	5.52614e-09	1.39545e-05	2.39543e-06	7 x 38	K	18 q11	prostate cancer associated transcript 18 (non-protein coding) [Source:HGNC Symbol;Acc:HGNC:49211]
45	ENSG00000188869	TMC3	-1.09006	-0.415526	-8.81661	6.54478e-09	1.39545e-05	2.74996e-06	5 x 39	K	15 q25	transmembrane channel like 3 [Source:HGNC Symbol;Acc:HGNC:22995]
46	ENSG00000135346	CGA	-1.5197	-0.508064	-8.27942	8.05757e-09	1.39545e-05	3.2381e-06	26 x 16		6 q14	glycoprotein hormones, alpha polypeptide [Source:HGNC Symbol;Acc:HGNC:1885]
47	ENSG00000213538		-0.976101	-0.384223	-9.89927	8.29547e-09	1.39545e-05	3.31103e-06	9 x 36		11 p15	keratin 8 pseudogene 41 [Source:HGNC Symbol;Acc:HGNC:39875]
48	ENSG00000268100		-0.779627	-0.323598	-9.28014	8.45272e-09	2.42254e-05	3.35868e-06	12 x 38		19 p12
49	ENSG00000267056		-1.34548	-0.475395	-10.4785	1.16374e-08	2.42254e-05	4.39457e-06	1 x 5	H	19 p13
50	ENSG00000101435	CST9L	-0.756195	-0.315806	-8.20856	1.35827e-08	2.42254e-05	4.97819e-06	7 x 36		20 p11	cystatin 9 like [Source:HGNC Symbol;Acc:HGNC:16233]
51	ENSG00000108932	SLC16A6	-2.62033	-0.561349	-11.4904	1.39849e-08	2.42254e-05	5.09461e-06	10 x 38	K	17 q24	solute carrier family 16 member 6 [Source:HGNC Symbol;Acc:HGNC:10927]
52	ENSG00000183273	CCDC60	-0.858997	-0.349103	-8.51229	1.473e-08	2.42254e-05	5.30657e-06	11 x 36		12 q24	coiled-coil domain containing 60 [Source:HGNC Symbol;Acc:HGNC:28610]
53	ENSG00000175766	EIF4E1B	-0.703573	-0.297869	-7.7855	1.48035e-08	4.03955e-05	5.32724e-06	14 x 40		5 q35	eukaryotic translation initiation factor 4E family member 1B [Source:HGNC Symbol;Acc:HGNC:33179]
54	ENSG00000118298	CA14	-0.79261	-0.327864	-8.92427	1.85135e-08	4.03955e-05	6.44917e-06	3 x 33		1 q21	carbonic anhydrase 14 [Source:HGNC Symbol;Acc:HGNC:1372]
55	ENSG00000223783		-0.636256	-0.274042	-8.65884	2.06602e-08	4.03955e-05	7.06618e-06	7 x 34		3 q29	long intergenic non-protein coding RNA 1983 [Source:HGNC Symbol;Acc:HGNC:52813]
56	ENSG00000149403	GRIK4	-1.39082	-0.484534	-9.87835	2.20094e-08	4.03955e-05	7.44262e-06	1 x 36		11 q23	glutamate ionotropic receptor kainate type subunit 4 [Source:HGNC Symbol;Acc:HGNC:4582]
57	ENSG00000186115	CYP4F2	-0.587072	-0.256009	-8.37743	2.47627e-08	4.03955e-05	8.18501e-06	5 x 35		19 p13	cytochrome P450 family 4 subfamily F member 2 [Source:HGNC Symbol;Acc:HGNC:2645]
58	ENSG00000274346		-0.272737	-0.128288	-9.37	2.74324e-08	4.03955e-05	8.87359e-06	12 x 15		2 q37
59	ENSG00000275965		-0.317287	-0.147702	-9.33855	3.14634e-08	4.03955e-05	9.85927e-06	11 x 15		15 q26
60	ENSG00000233041	PHGR1	-1.33927	-0.474109	-8.62475	3.48861e-08	4.03955e-05	1.06491e-05	8 x 36		15 q15	proline, histidine and glycine rich 1 [Source:HGNC Symbol;Acc:HGNC:37226]
61	ENSG00000132681	ATP1A4	-1.98728	-0.562998	-9.7818	3.58383e-08	4.03955e-05	1.08616e-05	6 x 36		1 q23	ATPase Na+/K+ transporting subunit alpha 4 [Source:HGNC Symbol;Acc:HGNC:14073]
62	ENSG00000250049		-0.246134	-0.11649	-7.64833	3.76115e-08	4.03955e-05	1.12493e-05	25 x 31		5 q14
63	ENSG00000230922	LOC101927551	-0.369439	-0.169877	-7.63767	3.77847e-08	4.03955e-05	1.12867e-05	2 x 34		22 q13
64	ENSG00000280028		-0.264958	-0.124854	-8.96152	3.81011e-08	5.11667e-05	1.13546e-05	13 x 17		17 q22
65	ENSG00000182902	SLC25A18	-0.701141	-0.297025	-7.99663	4.07838e-08	0.00014427	1.19671e-05	30 x 30		22 q11	solute carrier family 25 member 18 [Source:HGNC Symbol;Acc:HGNC:10988]
66	ENSG00000102001	CACNA1F	-1.18606	-0.439699	-9.29016	5.18685e-08	0.00014427	1.48841e-05	4 x 28		X p11	calcium voltage-gated channel subunit alpha1 F [Source:HGNC Symbol;Acc:HGNC:1393]
67	ENSG00000279501		-0.231777	-0.110058	-6.96772	6.04636e-08	0.00014427	1.70589e-05	25 x 33		21 p11
68	ENSG00000260618		-1.2507	-0.454842	-10.0679	6.34764e-08	0.000166209	1.7804e-05	3 x 23		15 q21
69	ENSG00000273472		-1.89557	-0.555985	-10.0028	8.36791e-08	0.000166209	2.26967e-05	8 x 35		4 q31
70	ENSG00000280119		-2.01556	-0.564791	-9.73555	1.09927e-07	0.000166209	2.85914e-05	2 x 26		2 q37
71	ENSG00000270084	GAS5-AS1	-0.554067	-0.243611	-9.39961	1.10219e-07	0.000166209	2.86541e-05	11 x 33		1 q25	GAS5 antisense RNA 1 [Source:HGNC Symbol;Acc:HGNC:44119]
72	ENSG00000235836		-0.222064	-0.105681	-7.08585	1.14109e-07	0.000166209	2.94861e-05	15 x 33		3 q29	kinesin family member 3A pseudogene 1 [Source:HGNC Symbol;Acc:HGNC:52811]
73	ENSG00000226965	LOC105375451	-0.733007	-0.307976	-8.87513	1.14692e-07	0.000166209	2.96099e-05	5 x 36		7 q31
74	ENSG00000109436	TBC1D9	-2.51401	-0.567737	-10.3684	1.15763e-07	0.000274735	2.98368e-05	1 x 7	H	4 q31	TBC1 domain family member 9 [Source:HGNC Symbol;Acc:HGNC:21710]
75	ENSG00000232400		-1.78986	-0.545623	-9.77187	1.33793e-07	0.000274735	3.39102e-05	1 x 18		7 p21	RAD17 checkpoint clamp loader component pseudogene 1 [Source:HGNC Symbol;Acc:HGNC:9808]
76	ENSG00000280068		-0.632291	-0.272608	-9.00036	1.54875e-07	0.000274735	3.85048e-05	21 x 35		5 q35
77	ENSG00000257878		-0.221274	-0.105324	-7.15291	1.70883e-07	0.000274735	4.18779e-05	17 x 34		12 q23
78	ENSG00000260009	LINC02130	-0.916601	-0.366753	-9.15167	2.02644e-07	0.000274735	4.82933e-05	10 x 37		16 p13	long intergenic non-protein coding RNA 2130 [Source:HGNC Symbol;Acc:HGNC:52989]
79	ENSG00000069764	PLA2G10	-1.05367	-0.405839	-8.97061	2.17185e-07	0.000274735	5.11139e-05	10 x 37		16 p13	phospholipase A2 group X [Source:HGNC Symbol;Acc:HGNC:9029]
80	ENSG00000258408		-0.736122	-0.309035	-8.33236	2.35076e-07	0.000274735	5.44893e-05	11 x 35		14 q24	5',3'-nucleotidase, cytosolic pseudogene 2 [Source:HGNC Symbol;Acc:HGNC:20047]
81	ENSG00000112996	MRPS30	-1.23154	-0.450447	-8.32007	2.42469e-07	0.000274735	5.58547e-05	19 x 40		5 p12	mitochondrial ribosomal protein S30 [Source:HGNC Symbol;Acc:HGNC:8769]
82	ENSG00000279717		-0.598139	-0.260112	-7.45313	2.48472e-07	0.000274735	5.69508e-05	1 x 33		19 p13
83	ENSG00000273693		-0.212708	-0.101446	-6.74258	2.64398e-07	0.000274735	5.98066e-05	18 x 33		Y q11	chromosome 2 open reading frame 27A pseudogene 1 [Source:HGNC Symbol;Acc:HGNC:38413]
84	ENSG00000122711	SPINK4	-1.07813	-0.412382	-8.24609	2.77715e-07	0.000274735	6.21376e-05	9 x 37		9 p13	serine peptidase inhibitor, Kazal type 4 [Source:HGNC Symbol;Acc:HGNC:16646]
85	ENSG00000158683	PKD1L1	-0.83133	-0.340369	-8.57208	3.01185e-07	0.000274735	6.61249e-05	13 x 36		7 p12	polycystin 1 like 1, transient receptor potential channel interacting [Source:HGNC Symbol;Acc:HGNC:18053]
86	ENSG00000249306		-1.52877	-0.509583	-8.33769	3.07978e-07	0.000274735	6.72513e-05	8 x 36		5 q35	long intergenic non-protein coding RNA 1411 [Source:HGNC Symbol;Acc:HGNC:50703]
87	ENSG00000164796	CSMD3	-0.650177	-0.279051	-6.10834	3.36756e-07	0.000274735	7.1891e-05	26 x 31		8 q23	CUB and Sushi multiple domains 3 [Source:HGNC Symbol;Acc:HGNC:19291]
88	ENSG00000262521		-0.207541	-0.0990983	-6.79966	3.40932e-07	0.000274735	7.2547e-05	31 x 13		16 p13
89	ENSG00000127325	BEST3	-0.640596	-0.275608	-7.38783	3.80935e-07	0.000274735	7.86232e-05	12 x 35		12 q15	bestrophin 3 [Source:HGNC Symbol;Acc:HGNC:17105]
90	ENSG00000140527	WDR93	-1.23709	-0.451729	-8.84983	3.95518e-07	0.000274735	8.07485e-05	1 x 40		15 q26	WD repeat domain 93 [Source:HGNC Symbol;Acc:HGNC:26924]
91	ENSG00000243064	ABCC13	-1.79152	-0.545805	-7.85561	3.95936e-07	0.000274735	8.08087e-05	9 x 36		21 q11	ATP binding cassette subfamily C member 13 (pseudogene) [Source:HGNC Symbol;Acc:HGNC:16022]
92	ENSG00000279271		-0.430917	-0.195255	-7.95628	4.00116e-07	0.000274735	8.1409e-05	13 x 35		8 p22
93	ENSG00000215023		-0.68079	-0.289916	-8.13826	4.07141e-07	0.000274735	8.24097e-05	9 x 19		2 q37
94	ENSG00000234715	LOC101927870	-0.940794	-0.37395	-8.16713	4.13589e-07	0.000274735	8.3319e-05	8 x 37		7 q22
95	ENSG00000272342	LINC01115	-0.605023	-0.262652	-7.43972	4.18259e-07	0.000355006	8.39722e-05	16 x 35		2 p25	long intergenic non-protein coding RNA 1115 [Source:NCBI gene;Acc:339822]
96	ENSG00000176601	MAP3K19	-0.725721	-0.305492	-7.2945	4.4879e-07	0.000355006	8.85725e-05	1 x 40		2 q21	mitogen-activated protein kinase kinase kinase 19 [Source:HGNC Symbol;Acc:HGNC:26249]
97	ENSG00000259793		-1.59345	-0.519897	-8.70855	4.62979e-07	0.000355006	9.06577e-05	7 x 34		2 q37
98	ENSG00000104332	SFRP1	3.31507	2.85706	9.12475	4.89915e-07	0.000355006	9.45277e-05	13 x 1		8 p11	secreted frizzled related protein 1 [Source:HGNC Symbol;Acc:HGNC:10776]
99	ENSG00000224559	LINC01087	-2.95157	-0.525636	-8.83876	5.09132e-07	0.000355006	9.72202e-05	6 x 35		2 q21	long intergenic non-protein coding RNA 1087 [Source:HGNC Symbol;Acc:HGNC:49144]
100	ENSG00000277010		-0.942334	-0.374403	-7.8267	5.46896e-07	0.000355006	0.000102352	9 x 35		16 p13
101	ENSG00000254290		-1.87538	-0.554194	-9.03216	5.48312e-07	0.000355006	0.000102541	3 x 37		8 p11
102	ENSG00000228109	MELTF-AS1	1.65816	1.1293	9.51021	5.54636e-07	0.000355006	0.000103379	32 x 34		3 q29	MELTF antisense RNA 1 [Source:HGNC Symbol;Acc:HGNC:40373]
103	ENSG00000130643	CALY	-0.788626	-0.326559	-7.87103	5.67165e-07	0.000647174	0.000105023	28 x 30		10 q26	calcyon neuron specific vesicular protein [Source:HGNC Symbol;Acc:HGNC:17938]
104	ENSG00000205549	C9orf92	-0.255306	-0.120575	-7.41054	6.23027e-07	0.000647174	0.000113552	21 x 30		9 p22	chromosome 9 open reading frame 92 [Source:HGNC Symbol;Acc:HGNC:19054]
105	ENSG00000050438	SLC4A8	-2.41341	-0.571509	-8.97149	6.88832e-07	0.000647174	0.000123262	1 x 36		12 q13	solute carrier family 4 member 8 [Source:HGNC Symbol;Acc:HGNC:11034]
106	ENSG00000166959	MS4A8	-1.64243	-0.527101	-8.00279	6.95749e-07	0.000647174	0.000124262	1 x 38		11 q12	membrane spanning 4-domains A8 [Source:HGNC Symbol;Acc:HGNC:13380]
107	ENSG00000153914	SREK1	-0.612096	-0.26525	-8.71987	7.86101e-07	0.000647174	0.000136983	4 x 19		5 q12	splicing regulatory glutamic acid and lysine rich protein 1 [Source:HGNC Symbol;Acc:HGNC:17882]
108	ENSG00000157404	KIT	1.54848	1.03607	8.26548	8.25629e-07	0.000647174	0.000142356	12 x 2		4 q12	KIT proto-oncogene receptor tyrosine kinase [Source:HGNC Symbol;Acc:HGNC:6342]
109	ENSG00000240216		-1.70082	-0.535004	-7.76059	8.56456e-07	0.000647174	0.000146468	9 x 36		3 q25	ceruloplasmin and hephaestin-like 1 pseudogene [Source:HGNC Symbol;Acc:HGNC:31714]
110	ENSG00000124249	KCNK15	-2.56233	-0.56514	-8.76175	8.83773e-07	0.000647174	0.000150057	12 x 40	K	20 q13	potassium two pore domain channel subfamily K member 15 [Source:HGNC Symbol;Acc:HGNC:13814]
111	ENSG00000170419	VSTM2A	-2.02003	-0.565057	-7.18007	8.98953e-07	0.000647174	0.000152029	8 x 36		7 p11	V-set and transmembrane domain containing 2A [Source:HGNC Symbol;Acc:HGNC:28499]
112	ENSG00000029725	RABEP1	-1.25656	-0.456169	-8.69318	9.14588e-07	0.000647174	0.000154044	1 x 17		17 p13	rabaptin, RAB GTPase binding effector protein 1 [Source:HGNC Symbol;Acc:HGNC:17677]
113	ENSG00000235269		-0.442364	-0.199889	-7.56833	9.3976e-07	0.000647174	0.000157253	9 x 12		14 q22	long intergenic non-protein coding RNA 2331 [Source:HGNC Symbol;Acc:HGNC:53251]
114	ENSG00000124171	PARD6B	-1.94219	-0.559779	-8.60756	9.40415e-07	0.000723174	0.000157336	6 x 34		20 q13	par-6 family cell polarity regulator beta [Source:HGNC Symbol;Acc:HGNC:16245]
115	ENSG00000223979	SMCR2	-0.700255	-0.296718	-7.99107	1.0108e-06	0.000723174	0.000166402	9 x 34		17 p11	Smith-Magenis syndrome chromosome region, candidate 2 (non-protein coding) [Source:HGNC Symbol;Acc:HGNC:17914]
116	ENSG00000163681	SLMAP	-0.465478	-0.20916	-7.85879	1.04488e-06	0.000723174	0.000170688	3 x 12	I	3 p14	sarcolemma associated protein [Source:HGNC Symbol;Acc:HGNC:16643]
117	ENSG00000228634		-0.633234	-0.272949	-8.10419	1.09453e-06	0.000723174	0.000176816	8 x 19		1 p35
118	ENSG00000255980		-0.618178	-0.267476	-7.64978	1.09542e-06	0.000723174	0.000176924	10 x 34		11 q13
119	ENSG00000145781	COMMD10	-0.762157	-0.3178	-8.58009	1.17259e-06	0.000723174	0.00018618	20 x 40		5 q23	COMM domain containing 10 [Source:HGNC Symbol;Acc:HGNC:30201]
120	ENSG00000278231		-0.551048	-0.242466	-7.747	1.17747e-06	0.000723174	0.000186755	28 x 34		20 q13
121	ENSG00000227482		-0.591285	-0.257574	-7.05362	1.2224e-06	0.000723174	0.000191988	25 x 12		9 q32
122	ENSG00000280217		-0.783885	-0.325001	-7.15645	1.25631e-06	0.000723174	0.000195872	3 x 34		12 q24
123	ENSG00000235399		-0.35537	-0.163953	-7.45748	1.28166e-06	0.000746794	0.000198739	16 x 35		6 q23
124	ENSG00000259964		-0.597383	-0.259833	-7.81775	1.3511e-06	0.000746794	0.000206529	1 x 25		15 q23	THSD4 antisense RNA 1 [Source:HGNC Symbol;Acc:HGNC:51420]
125	ENSG00000203950	RTL8A	0.711326	0.410966	7.79617	1.4472e-06	0.000746794	0.000216951	37 x 34		X q26	retrotransposon Gag like 8A [Source:HGNC Symbol;Acc:HGNC:24514]
126	ENSG00000183644	C11orf88	-0.571484	-0.250183	-6.91501	1.56269e-06	0.000746794	0.000228955	1 x 40		11 q23	chromosome 11 open reading frame 88 [Source:HGNC Symbol;Acc:HGNC:25061]
127	ENSG00000150667	FSIP1	-2.91072	-0.531335	-8.32663	1.62326e-06	0.000746794	0.000235037	4 x 38		15 q14	fibrous sheath interacting protein 1 [Source:HGNC Symbol;Acc:HGNC:21674]
128	ENSG00000160182	TFF1	-4.34667	-0.112437	-8.29036	1.63683e-06	0.000746794	0.00023638	7 x 40	K	21 q22	trefoil factor 1 [Source:HGNC Symbol;Acc:HGNC:11755]
129	ENSG00000085978	ATG16L1	-0.824228	-0.338099	-8.34184	1.65325e-06	0.000746794	0.000237996	2 x 15	I	2 q37	autophagy related 16 like 1 [Source:HGNC Symbol;Acc:HGNC:21498]
130	ENSG00000117479	SLC19A2	-1.19589	-0.442061	-7.98514	1.70046e-06	0.000746794	0.000242584	1 x 17		1 q24	solute carrier family 19 member 2 [Source:HGNC Symbol;Acc:HGNC:10938]
131	ENSG00000232352	SEMA3B-AS1	-1.17426	-0.436836	-8.06464	1.70872e-06	0.000746794	0.000243379	14 x 40		3 p21	SEMA3B antisense RNA 1 (head to head) [Source:HGNC Symbol;Acc:HGNC:49096]
132	ENSG00000134533	RERG	-2.16243	-0.571293	-8.39556	1.73319e-06	0.000746794	0.000245717	5 x 38		12 p12	RAS like estrogen regulated growth inhibitor [Source:HGNC Symbol;Acc:HGNC:15980]
133	ENSG00000187045	TMPRSS6	-1.9864	-0.562939	-7.76402	1.74202e-06	0.000746794	0.000246555	1 x 36		22 q12	transmembrane protease, serine 6 [Source:HGNC Symbol;Acc:HGNC:16517]
134	ENSG00000140284	SLC27A2	-2.22567	-0.572643	-8.03484	1.74439e-06	0.000746794	0.00024678	6 x 39	K	15 q21	solute carrier family 27 member 2 [Source:HGNC Symbol;Acc:HGNC:10996]
135	ENSG00000196415	PRTN3	-0.704796	-0.298293	-7.04324	1.75418e-06	0.000746794	0.000247706	15 x 39		19 p13	proteinase 3 [Source:HGNC Symbol;Acc:HGNC:9495]
136	ENSG00000234115		-1.03489	-0.400726	-7.43275	1.79068e-06	0.00102694	0.000251127	1 x 22		6 p24
137	ENSG00000100095	SEZ6L	-1.77566	-0.544046	-7.48896	1.96691e-06	0.00102694	0.000269359	1 x 1		22 q12	seizure related 6 homolog like [Source:HGNC Symbol;Acc:HGNC:10763]
138	ENSG00000256650		-1.12075	-0.423472	-8.0628	1.97189e-06	0.00102694	0.000269862	2 x 24		12 p12	RERG intronic transcript 1 [Source:HGNC Symbol;Acc:HGNC:39991]
139	ENSG00000116176	TPSG1	-1.70503	-0.535544	-7.48242	1.99652e-06	0.00102694	0.000272338	1 x 2	H	16 p13	tryptase gamma 1 [Source:HGNC Symbol;Acc:HGNC:14134]
140	ENSG00000278683		-0.798553	-0.329805	-7.1202	2.25007e-06	0.00102694	0.000296924	6 x 33		7 q22
141	ENSG00000150676	CCDC83	-0.80711	-0.332585	-7.52775	2.25801e-06	0.00102694	0.000297668	9 x 35		11 q14	coiled-coil domain containing 83 [Source:HGNC Symbol;Acc:HGNC:28535]
142	ENSG00000256678		-0.751001	-0.314062	-6.46932	2.28312e-06	0.00102694	0.000300012	8 x 35		12 q15
143	ENSG00000261257		-0.639556	-0.275233	-7.18302	2.29875e-06	0.00102694	0.000301463	7 x 35		11 q24
144	ENSG00000137501	SYTL2	-1.75442	-0.541604	-8.02643	2.3037e-06	0.00102694	0.000301921	2 x 2	H	11 q14	synaptotagmin like 2 [Source:HGNC Symbol;Acc:HGNC:15585]
145	ENSG00000279930		-1.45438	-0.496591	-7.48531	2.31795e-06	0.00102694	0.000303237	4 x 26		16 p13
146	ENSG00000143318	CASQ1	-0.937415	-0.372952	-7.16388	2.34925e-06	0.00102694	0.000306111	3 x 34		1 q23	calsequestrin 1 [Source:HGNC Symbol;Acc:HGNC:1512]
147	ENSG00000128602	SMO	1.84647	1.29548	8.36911	2.43607e-06	0.00102694	0.000313965	31 x 25	B	7 q32	smoothened, frizzled class receptor [Source:HGNC Symbol;Acc:HGNC:11119]
148	ENSG00000009765	IYD	-1.68058	-0.532348	-7.39057	2.4368e-06	0.00155241	0.00031403	10 x 38	K	6 q25	iodotyrosine deiodinase [Source:HGNC Symbol;Acc:HGNC:21071]
149	ENSG00000162738	VANGL2	1.6272	1.10271	7.54848	2.53503e-06	0.00155241	0.000324047	29 x 24		1 q23	VANGL planar cell polarity protein 2 [Source:HGNC Symbol;Acc:HGNC:15511]
150	ENSG00000108176	DNAJC12	-2.43299	-0.570948	-7.8446	2.79696e-06	0.00155241	0.000349981	6 x 37		10 q21	DnaJ heat shock protein family (Hsp40) member C12 [Source:HGNC Symbol;Acc:HGNC:28908]
151	ENSG00000074219	TEAD2	1.15285	0.721589	7.64143	2.82924e-06	0.00155241	0.000353101	33 x 23	B	19 q13	TEA domain transcription factor 2 [Source:HGNC Symbol;Acc:HGNC:11715]
152	ENSG00000253632		-0.540192	-0.238329	-6.19516	3.04597e-06	0.00155241	0.00037364	17 x 36		8 p12
153	ENSG00000196466	ZNF799	-0.719464	-0.303349	-7.7494	3.07e-06	0.00155241	0.000375874	10 x 36		19 p13	zinc finger protein 799 [Source:HGNC Symbol;Acc:HGNC:28071]
154	ENSG00000168268	NT5DC2	0.886523	0.529131	7.42391	3.17869e-06	0.00155241	0.000385873	34 x 28		3 p21	5'-nucleotidase domain containing 2 [Source:HGNC Symbol;Acc:HGNC:25717]
155	ENSG00000129993	CBFA2T3	-1.77557	-0.544036	-7.77964	3.21522e-06	0.00155241	0.000389196	2 x 3	H	16 q24	CBFA2/RUNX1 translocation partner 3 [Source:HGNC Symbol;Acc:HGNC:1537]
156	ENSG00000236054		-0.852986	-0.347219	-6.88438	3.23937e-06	0.00155241	0.000391382	7 x 35		22 q12
157	ENSG00000272335		-1.35179	-0.476694	-7.2073	3.29332e-06	0.00155241	0.000396237	1 x 25		5 p12
158	ENSG00000237637		-0.649934	-0.278964	-7.55798	3.71585e-06	0.00155241	0.000432897	12 x 33		13 q13	FRY antisense RNA 1 [Source:HGNC Symbol;Acc:HGNC:39725]
159	ENSG00000203985	LDLRAD1	-1.61696	-0.52342	-7.57096	3.72798e-06	0.00155241	0.000433915	8 x 40	K	1 p32	low density lipoprotein receptor class A domain containing 1 [Source:HGNC Symbol;Acc:HGNC:32069]
160	ENSG00000104365	IKBKB	-0.804299	-0.331674	-7.41052	3.74551e-06	0.00155241	0.000435384	10 x 35		8 p11	inhibitor of nuclear factor kappa B kinase subunit beta [Source:HGNC Symbol;Acc:HGNC:5960]
161	ENSG00000228639	LINC02095	3.00355	2.48649	8.0602	3.83024e-06	0.00155241	0.000442426	21 x 24		17 q24	long intergenic non-protein coding RNA 2095 [Source:HGNC Symbol;Acc:HGNC:52946]
162	ENSG00000237292	LINC01732	-0.226942	-0.107882	-6.67716	3.87161e-06	0.00155241	0.000445833	19 x 31		1 q25	long intergenic non-protein coding RNA 1732 [Source:HGNC Symbol;Acc:HGNC:52520]
163	ENSG00000102362	SYTL4	-1.49315	-0.503513	-7.83317	3.8792e-06	0.00155241	0.000446455	1 x 2	H	X q22	synaptotagmin like 4 [Source:HGNC Symbol;Acc:HGNC:15588]
164	ENSG00000100842	EFS	0.968243	0.58654	6.9693	4.16797e-06	0.00155241	0.000469635	31 x 25	B	14 q11	embryonal Fyn-associated substrate [Source:HGNC Symbol;Acc:HGNC:16898]
165	ENSG00000269516		-2.26586	-0.573047	-7.74616	4.3153e-06	0.00155241	0.000481091	2 x 25		19 p13	cytochrome P450 family 4 subfamily F member 23, pseudogene [Source:HGNC Symbol;Acc:HGNC:39944]
166	ENSG00000136546	SCN7A	-1.63274	-0.525718	-7.33909	4.36392e-06	0.00155241	0.000484819	14 x 1		2 q24	sodium voltage-gated channel alpha subunit 7 [Source:HGNC Symbol;Acc:HGNC:10594]
167	ENSG00000203697	CAPN8	-2.93542	-0.527932	-7.68837	4.38975e-06	0.00155241	0.000486789	9 x 40	K	1 q41	calpain 8 [Source:HGNC Symbol;Acc:HGNC:1485]
168	ENSG00000224272		-1.36496	-0.479378	-7.11215	4.46126e-06	0.00155241	0.000492204	17 x 19		2 q37
169	ENSG00000115556	PLCD4	-0.90813	-0.364203	-7.25532	4.46279e-06	0.00155241	0.00049232	2 x 24		2 q35	phospholipase C delta 4 [Source:HGNC Symbol;Acc:HGNC:9062]
170	ENSG00000237940	LINC01238	-1.80077	-0.546805	-7.09278	4.51005e-06	0.00155241	0.000495868	3 x 26		2 q37	long intergenic non-protein coding RNA 1238 [Source:HGNC Symbol;Acc:HGNC:49795]
171	ENSG00000177839	PCDHB9	1.68657	1.15387	7.7463	4.52934e-06	0.00155241	0.00049731	32 x 23	B	5 q31	protocadherin beta 9 [Source:HGNC Symbol;Acc:HGNC:8694]
172	ENSG00000226835	LOC107985092	-1.26836	-0.45882	-7.32308	4.57145e-06	0.00155241	0.000500442	16 x 39		1 p22
173	ENSG00000100583	SAMD15	-1.3468	-0.475668	-7.53336	4.58137e-06	0.00155241	0.000501178	3 x 40		14 q24	sterile alpha motif domain containing 15 [Source:HGNC Symbol;Acc:HGNC:18631]
174	ENSG00000165533	TTC8	-1.03234	-0.400026	-7.77067	4.60247e-06	0.00155241	0.000502739	7 x 37		14 q31	tetratricopeptide repeat domain 8 [Source:HGNC Symbol;Acc:HGNC:20087]
175	ENSG00000184860	SDR42E1	1.22636	0.777443	6.98471	4.81251e-06	0.00155241	0.000518026	33 x 21		16 q23	short chain dehydrogenase/reductase family 42E, member 1 [Source:HGNC Symbol;Acc:HGNC:29834]
176	ENSG00000047346	FAM214A	-1.44956	-0.495708	-7.65809	4.83171e-06	0.00155241	0.000519401	9 x 37		15 q21	family with sequence similarity 214 member A [Source:HGNC Symbol;Acc:HGNC:25609]
177	ENSG00000010310	GIPR	-1.39904	-0.486144	-7.49463	4.83673e-06	0.00155241	0.00051976	4 x 27		19 q13	gastric inhibitory polypeptide receptor [Source:HGNC Symbol;Acc:HGNC:4271]
178	ENSG00000135069	PSAT1	3.66326	3.29632	7.90768	4.9261e-06	0.00155241	0.000526109	34 x 24	B	9 q21	phosphoserine aminotransferase 1 [Source:HGNC Symbol;Acc:HGNC:19129]
179	ENSG00000151952	TMEM132D	-0.379209	-0.173965	-6.71879	5.12038e-06	0.00155241	0.000539645	11 x 10		12 q24	transmembrane protein 132D [Source:HGNC Symbol;Acc:HGNC:29411]
180	ENSG00000173467	AGR3	-4.32812	-0.120718	-7.69366	5.21974e-06	0.00155241	0.000546431	4 x 40	K	7 p21	anterior gradient 3, protein disulphide isomerase family member [Source:HGNC Symbol;Acc:HGNC:24167]
181	ENSG00000119866	BCL11A	2.71556	2.16274	7.68532	5.22444e-06	0.00155241	0.00054675	38 x 21	C	2 p16	B-cell CLL/lymphoma 11A [Source:HGNC Symbol;Acc:HGNC:13221]
182	ENSG00000105792	CFAP69	-1.19604	-0.442097	-7.35542	5.22636e-06	0.00155241	0.00054688	3 x 40		7 q21	cilia and flagella associated protein 69 [Source:HGNC Symbol;Acc:HGNC:26107]
183	ENSG00000223318		-0.379695	-0.174168	-6.68655	5.28558e-06	0.00187013	0.000550878	12 x 11		2 q24	RNA, 5S ribosomal pseudogene 111 [Source:HGNC Symbol;Acc:HGNC:42909]
184	ENSG00000274281		-0.470654	-0.21122	-6.64885	5.5924e-06	0.00187013	0.000573057	24 x 33		15 q14
185	ENSG00000252027		-0.328563	-0.152546	-6.66957	5.65864e-06	0.00187013	0.000577747	14 x 35		2 q31	RNA, U6atac small nuclear 14, pseudogene [Source:HGNC Symbol;Acc:HGNC:46913]
186	ENSG00000261175		4.42918	4.35566	7.8431	5.81481e-06	0.00187013	0.000588673	40 x 11	D	16 q24	long intergenic non-protein coding RNA 2188 [Source:HGNC Symbol;Acc:HGNC:53050]
187	ENSG00000071051	NCK2	1.10097	0.682888	7.71683	5.84207e-06	0.00187013	0.000590561	32 x 23	B	2 q12	NCK adaptor protein 2 [Source:HGNC Symbol;Acc:HGNC:7665]
188	ENSG00000114805	PLCH1	2.38712	1.81563	7.30893	6.02151e-06	0.00187013	0.000602853	32 x 24	B	3 q25	phospholipase C eta 1 [Source:HGNC Symbol;Acc:HGNC:29185]
189	ENSG00000202522		-0.873911	-0.353742	-7.3802	6.05199e-06	0.00187013	0.000604918	5 x 19		11 q13	Y RNA [Source:RFAM;Acc:RF00019]
190	ENSG00000234949	LOC105373958	-1.25074	-0.454849	-7.47542	6.24754e-06	0.00187013	0.000618004	15 x 40		2 q37
191	ENSG00000122584	NXPH1	-1.4078	-0.487842	-6.22383	6.30456e-06	0.00187013	0.00062177	1 x 18		7 p21	neurexophilin 1 [Source:HGNC Symbol;Acc:HGNC:20693]
192	ENSG00000021645	NRXN3	-1.32421	-0.470952	-6.96105	6.3836e-06	0.00187013	0.000626951	1 x 1		14 q24	neurexin 3 [Source:HGNC Symbol;Acc:HGNC:8010]
193	ENSG00000182348	ZNF804B	-0.399696	-0.18247	-5.59034	6.42481e-06	0.00187013	0.000629636	2 x 19		7 q21	zinc finger protein 804B [Source:HGNC Symbol;Acc:HGNC:21958]
194	ENSG00000166780	C16orf45	-1.81272	-0.548071	-7.37652	6.44435e-06	0.00187013	0.000630905	2 x 1		16 p13	chromosome 16 open reading frame 45 [Source:HGNC Symbol;Acc:HGNC:19213]
195	ENSG00000075891	PAX2	-1.85749	-0.552533	-7.24217	6.48004e-06	0.00187013	0.000633216	1 x 35		10 q24	paired box 2 [Source:HGNC Symbol;Acc:HGNC:8616]
196	ENSG00000257256		-0.395486	-0.18073	-7.19171	6.56026e-06	0.00221301	0.000638379	11 x 18		12 q13
197	ENSG00000141424	SLC39A6	-1.97912	-0.562448	-7.24556	6.74182e-06	0.00221301	0.000650851	1 x 18		18 q12	solute carrier family 39 member 6 [Source:HGNC Symbol;Acc:HGNC:18607]
198	ENSG00000156049	GNA14	-1.3337	-0.472946	-7.0617	6.98472e-06	0.00221301	0.00066723	3 x 2	H	9 q21	G protein subunit alpha 14 [Source:HGNC Symbol;Acc:HGNC:4382]
199	ENSG00000186765	FSCN2	-0.928263	-0.370238	-7.06484	7.20558e-06	0.00221301	0.000681828	4 x 24		17 q25	fascin actin-bundling protein 2, retinal [Source:HGNC Symbol;Acc:HGNC:3960]
200	ENSG00000112183	RBM24	-1.8696	-0.553665	-6.78805	7.32103e-06	0.00221301	0.00068935	2 x 38		6 p22	RNA binding motif protein 24 [Source:HGNC Symbol;Acc:HGNC:21539]
201	ENSG00000255367	LOC101927708	-1.16369	-0.434245	-7.41356	7.40232e-06	0.00221301	0.000694601	8 x 36		11 p15
202	ENSG00000101353	MROH8	-0.789821	-0.326951	-7.2345	7.46853e-06	0.00221301	0.000698852	4 x 32		20 q11	maestro heat like repeat family member 8 [Source:HGNC Symbol;Acc:HGNC:16125]
203	ENSG00000148143	ZNF462	1.68913	1.1561	7.4078	7.5634e-06	0.00221301	0.000704901	10 x 5		9 q31	zinc finger protein 462 [Source:HGNC Symbol;Acc:HGNC:21684]
204	ENSG00000186073	C15orf41	0.849213	0.503406	7.29701	7.61499e-06	0.00221301	0.000708171	31 x 21		15 q14	chromosome 15 open reading frame 41 [Source:HGNC Symbol;Acc:HGNC:26929]
205	ENSG00000204421	LY6G6C	-1.18404	-0.439211	-6.60047	7.78383e-06	0.00221301	0.000718773	14 x 39		6 p21	lymphocyte antigen 6 family member G6C [Source:HGNC Symbol;Acc:HGNC:13936]
206	ENSG00000130558	OLFM1	-1.72068	-0.537522	-7.17723	7.81286e-06	0.00221301	0.000720581	1 x 2	H	9 q34	olfactomedin 1 [Source:HGNC Symbol;Acc:HGNC:17187]
207	ENSG00000155329	ZCCHC10	-0.498713	-0.222286	-7.04577	8.00235e-06	0.00221301	0.000732275	20 x 39		5 q31	zinc finger CCHC-type containing 10 [Source:HGNC Symbol;Acc:HGNC:25954]
208	ENSG00000175336	APOF	-0.995503	-0.389753	-6.5965	8.06538e-06	0.00221301	0.000736124	8 x 36		12 q13	apolipoprotein F [Source:HGNC Symbol;Acc:HGNC:615]
209	ENSG00000223813		-1.95651	-0.56085	-7.46436	8.16296e-06	0.00221301	0.000742044	9 x 40	K	7 p14
210	ENSG00000232756		-0.819871	-0.336702	-6.80744	8.3352e-06	0.00221301	0.000752378	13 x 38		7 q21
211	ENSG00000251073		-0.575065	-0.251526	-6.98046	8.40442e-06	0.00221301	0.00075649	8 x 16		4 q32	nudix hydrolase 19 pseudogene 5 [Source:HGNC Symbol;Acc:HGNC:43589]
212	ENSG00000245750		-2.22013	-0.572559	-7.2489	8.57138e-06	0.00221301	0.000766314	6 x 36		15 q23	downregulated RNA in cancer, inhibitor of cell invasion and migration [Source:HGNC Symbol;Acc:HGNC:27082]
213	ENSG00000174292	TNK1	-0.907752	-0.364089	-7.09625	8.65594e-06	0.00221301	0.000771239	10 x 36		17 p13	tyrosine kinase non receptor 1 [Source:HGNC Symbol;Acc:HGNC:11940]
214	ENSG00000213144		-0.702731	-0.297577	-6.35563	8.71582e-06	0.00221301	0.000774707	25 x 13		12 q24
215	ENSG00000188542	DUSP28	-0.58425	-0.254958	-7.23545	8.80277e-06	0.00221301	0.000779713	7 x 33		2 q37	dual specificity phosphatase 28 [Source:HGNC Symbol;Acc:HGNC:33237]
216	ENSG00000122741	DCAF10	-0.854671	-0.347748	-6.78255	8.88085e-06	0.00230371	0.000784178	3 x 14		9 p13	DDB1 and CUL4 associated factor 10 [Source:HGNC Symbol;Acc:HGNC:23686]
217	ENSG00000225978		-0.650805	-0.279276	-6.04654	9.0676e-06	0.00230371	0.000794977	21 x 10		20 q13	highly accelerated region 1A (non-protein coding) [Source:HGNC Symbol;Acc:HGNC:33117]
218	ENSG00000059758	CDK17	-0.73516	-0.308708	-7.10082	9.32837e-06	0.00230371	0.000809803	1 x 17		12 q23	cyclin dependent kinase 17 [Source:HGNC Symbol;Acc:HGNC:8750]
219	ENSG00000153086	ACMSD	-0.935044	-0.37225	-6.28558	9.60938e-06	0.00230371	0.000825457	2 x 24		2 q21	aminocarboxymuconate semialdehyde decarboxylase [Source:HGNC Symbol;Acc:HGNC:19288]
220	ENSG00000241280		-0.658496	-0.282024	-6.03117	9.81979e-06	0.00230371	0.000836965	16 x 36		3 q12
221	ENSG00000188175	HEPACAM2	-1.74723	-0.540755	-6.72776	1.00212e-05	0.00230371	0.000847815	7 x 37		7 q21	HEPACAM family member 2 [Source:HGNC Symbol;Acc:HGNC:27364]
222	ENSG00000183044	ABAT	-2.22243	-0.572595	-7.15098	1.01635e-05	0.00230371	0.000855383	5 x 37		16 p13	4-aminobutyrate aminotransferase [Source:HGNC Symbol;Acc:HGNC:23]
223	ENSG00000167491	GATAD2A	0.66312	0.379627	7.28683	1.01755e-05	0.00230371	0.000856018	22 x 20		19 p13	GATA zinc finger domain containing 2A [Source:HGNC Symbol;Acc:HGNC:29989]
224	ENSG00000188916	FAM196A	-1.55663	-0.514137	-6.37556	1.01757e-05	0.00230371	0.000856027	1 x 1		10 q26	family with sequence similarity 196 member A [Source:HGNC Symbol;Acc:HGNC:33859]
225	ENSG00000232355		-0.45844	-0.206349	-6.53815	1.02136e-05	0.00230371	0.00085803	14 x 36		9 q34
226	ENSG00000134352	IL6ST	-1.53093	-0.509942	-7.03012	1.03393e-05	0.00230371	0.000864627	2 x 4	H	5 q11	interleukin 6 signal transducer [Source:HGNC Symbol;Acc:HGNC:6021]
227	ENSG00000170035	UBE2E3	1.31528	0.846568	7.15374	1.03764e-05	0.00230371	0.000866562	33 x 23	B	2 q31	ubiquitin conjugating enzyme E2 E3 [Source:HGNC Symbol;Acc:HGNC:12479]
228	ENSG00000146648	EGFR	1.21213	0.766536	6.65174	1.04828e-05	0.00230371	0.000872081	11 x 5		7 p11	epidermal growth factor receptor [Source:HGNC Symbol;Acc:HGNC:3236]
229	ENSG00000116138	DNAJC16	-0.784126	-0.32508	-7.24277	1.06238e-05	0.00230371	0.000879333	1 x 10	I	1 p36	DnaJ heat shock protein family (Hsp40) member C16 [Source:HGNC Symbol;Acc:HGNC:29157]
230	ENSG00000076108	BAZ2A	-0.62238	-0.269008	-7.04603	1.07881e-05	0.00230371	0.000887694	2 x 8	H	12 q13	bromodomain adjacent to zinc finger domain 2A [Source:HGNC Symbol;Acc:HGNC:962]
231	ENSG00000265766		-0.968174	-0.38194	-5.87769	1.08328e-05	0.00230371	0.000889952	1 x 19		18 p11	CXADR pseudogene 3 [Source:HGNC Symbol;Acc:HGNC:33974]
232	ENSG00000039319	ZFYVE16	-0.668883	-0.285714	-7.02004	1.09003e-05	0.00230371	0.000893344	1 x 16	I	5 q14	zinc finger FYVE-type containing 16 [Source:HGNC Symbol;Acc:HGNC:20756]
233	ENSG00000175356	SCUBE2	-3.41286	-0.436014	-7.09433	1.1122e-05	0.00230371	0.000904384	2 x 1		11 p15	signal peptide, CUB domain and EGF like domain containing 2 [Source:HGNC Symbol;Acc:HGNC:30425]
234	ENSG00000165555	NOXRED1	-0.870862	-0.352798	-7.15888	1.11992e-05	0.00230371	0.000908185	1 x 27		14 q24	NADP dependent oxidoreductase domain containing 1 [Source:HGNC Symbol;Acc:HGNC:20487]
235	ENSG00000176532	PRR15	-3.04297	-0.511567	-7.25917	1.14188e-05	0.00230371	0.000918892	9 x 40	K	7 p14	proline rich 15 [Source:HGNC Symbol;Acc:HGNC:22310]
236	ENSG00000174788	PCP2	-1.5499	-0.513053	-6.99504	1.14768e-05	0.00230371	0.000921693	5 x 29		19 p13	Purkinje cell protein 2 [Source:HGNC Symbol;Acc:HGNC:30209]
237	ENSG00000109618	SEPSECS	-0.776282	-0.322493	-7.01514	1.14781e-05	0.00230371	0.000921752	1 x 17		4 p15	Sep (O-phosphoserine) tRNA:Sec (selenocysteine) tRNA synthase [Source:HGNC Symbol;Acc:HGNC:30605]
238	ENSG00000175544	CABP4	-1.21241	-0.445981	-6.5491	1.16047e-05	0.00230371	0.000927826	11 x 40	K	11 q13	calcium binding protein 4 [Source:HGNC Symbol;Acc:HGNC:1386]
239	ENSG00000266145		-0.728376	-0.306398	-6.75127	1.16762e-05	0.00230371	0.000931229	4 x 20		18 p11
240	ENSG00000275805		-0.827665	-0.339199	-6.76815	1.18016e-05	0.00230371	0.000937161	2 x 22		18 q11
241	ENSG00000235205		-0.538641	-0.237736	-5.88764	1.19005e-05	0.00306884	0.000941806	7 x 16		13 q12	TatD DNase domain containing 2 pseudogene 3 [Source:HGNC Symbol;Acc:HGNC:39256]
242	ENSG00000139865	TTC6	-2.84041	-0.540291	-7.17951	1.20725e-05	0.00306884	0.0009512	5 x 36		14 q21	tetratricopeptide repeat domain 6 [Source:HGNC Symbol;Acc:HGNC:19739]
243	ENSG00000171365	CLCN5	0.99656	0.606773	7.07251	1.22701e-05	0.00306884	0.000961886	39 x 21	C	X p11	chloride voltage-gated channel 5 [Source:HGNC Symbol;Acc:HGNC:2023]
244	ENSG00000186910	SERPINA11	-2.64919	-0.559191	-6.82301	1.24589e-05	0.00306884	0.000972003	8 x 39	K	14 q32	serpin family A member 11 [Source:HGNC Symbol;Acc:HGNC:19193]
245	ENSG00000137563	GGH	1.24254	0.789894	6.65028	1.26461e-05	0.00306884	0.000981934	39 x 26	A	8 q12	gamma-glutamyl hydrolase [Source:HGNC Symbol;Acc:HGNC:4248]
246	ENSG00000268355		-0.97946	-0.385186	-6.83546	1.30828e-05	0.00306884	0.00100474	2 x 4	H	19 q13
247	ENSG00000233198	RNF224	-0.813395	-0.334617	-6.73006	1.39386e-05	0.00306884	0.00104802	4 x 32		9 q34	ring finger protein 224 [Source:HGNC Symbol;Acc:HGNC:41912]
248	ENSG00000203666	EFCAB2	-0.449413	-0.202729	-5.88488	1.39588e-05	0.00306884	0.00104902	1 x 30		1 q44	EF-hand calcium binding domain 2 [Source:HGNC Symbol;Acc:HGNC:28166]
249	ENSG00000197191	CYSRT1	-1.17122	-0.436092	-6.80973	1.4056e-05	0.00306884	0.00105381	15 x 40		9 q34	cysteine rich tail 1 [Source:HGNC Symbol;Acc:HGNC:30529]
250	ENSG00000253366		-0.396824	-0.181283	-6.32933	1.44084e-05	0.00306884	0.00107101	15 x 34		5 q13
251	ENSG00000280265		-0.318549	-0.148245	-6.1849	1.44504e-05	0.00306884	0.00107304	11 x 34		16 p12
252	ENSG00000182351		-0.394017	-0.180122	-6.55406	1.45861e-05	0.00306884	0.00107958	23 x 40		22 q11	cysteine rich protein 1 pseudogene 4 [Source:HGNC Symbol;Acc:HGNC:44519]
253	ENSG00000007062	PROM1	3.56575	3.17063	6.94894	1.46089e-05	0.00306884	0.00108067	40 x 19	C	4 p15	prominin 1 [Source:HGNC Symbol;Acc:HGNC:9454]
254	ENSG00000155511	GRIA1	-0.844246	-0.344467	-5.80404	1.46302e-05	0.00306884	0.00108169	1 x 1		5 q33	glutamate ionotropic receptor AMPA type subunit 1 [Source:HGNC Symbol;Acc:HGNC:4571]
255	ENSG00000163072	NOSTRIN	-1.67804	-0.532008	-6.86618	1.47931e-05	0.00306884	0.00108946	9 x 37		2 q24	nitric oxide synthase trafficking [Source:HGNC Symbol;Acc:HGNC:20203]
256	ENSG00000105388	CEACAM5	-3.41801	-0.434749	-6.79551	1.4916e-05	0.00306884	0.00109528	9 x 40	K	19 q13	carcinoembryonic antigen related cell adhesion molecule 5 [Source:HGNC Symbol;Acc:HGNC:1817]
257	ENSG00000244308		-0.257018	-0.121335	-6.28799	1.51238e-05	0.00306884	0.00110505	9 x 13		3 q13	RNA, 7SL, cytoplasmic 762, pseudogene [Source:HGNC Symbol;Acc:HGNC:46778]
258	ENSG00000119661	DNAL1	-0.878015	-0.35501	-6.84436	1.52887e-05	0.00306884	0.00111272	4 x 38		14 q24	dynein axonemal light chain 1 [Source:HGNC Symbol;Acc:HGNC:23247]
259	ENSG00000230542	LINC00102	-0.26183	-0.12347	-6.38067	1.54029e-05	0.00306884	0.00111801	12 x 17		X p22	long intergenic non-protein coding RNA 102 [Source:HGNC Symbol;Acc:HGNC:30470]
260	ENSG00000173838	2020-03-10	-0.969017	-0.382184	-6.46355	1.55292e-05	0.00306884	0.00112382	1 x 36		17 q23	membrane associated ring-CH-type finger 10 [Source:HGNC Symbol;Acc:HGNC:26655]
261	ENSG00000163040	CCDC74A	-1.5696	-0.5162	-6.52805	1.60423e-05	0.00306884	0.00114707	1 x 38		2 q21	coiled-coil domain containing 74A [Source:HGNC Symbol;Acc:HGNC:25197]
262	ENSG00000126262	FFAR2	-1.64819	-0.527913	-6.6846	1.60564e-05	0.00306884	0.0011477	25 x 12		19 q13	free fatty acid receptor 2 [Source:HGNC Symbol;Acc:HGNC:4501]
263	ENSG00000163491	NEK10	-2.05178	-0.566831	-6.57408	1.65679e-05	0.00306884	0.00117032	2 x 40		3 p24	NIMA related kinase 10 [Source:HGNC Symbol;Acc:HGNC:18592]
264	ENSG00000106829	TLE4	1.05989	0.652657	6.79426	1.66863e-05	0.00306884	0.00117548	29 x 1		9 q21	transducin like enhancer of split 4 [Source:HGNC Symbol;Acc:HGNC:11840]
265	ENSG00000154099	DNAAF1	-1.51762	-0.507713	-6.68917	1.67692e-05	0.00306884	0.00117908	1 x 40		16 q24	dynein axonemal assembly factor 1 [Source:HGNC Symbol;Acc:HGNC:30539]
266	ENSG00000213085	CFAP45	-1.29994	-0.465764	-6.63176	1.6999e-05	0.00306884	0.00118897	1 x 40		1 q23	cilia and flagella associated protein 45 [Source:HGNC Symbol;Acc:HGNC:17229]
267	ENSG00000275759		-0.586843	-0.255924	-6.44212	1.71597e-05	0.00306884	0.00119583	12 x 31		12 q24
268	ENSG00000106686	SPATA6L	-1.07494	-0.411536	-6.51105	1.72515e-05	0.00306884	0.00119973	1 x 27		9 p24	spermatogenesis associated 6 like [Source:HGNC Symbol;Acc:HGNC:25472]
269	ENSG00000106003	LFNG	-1.44651	-0.495146	-6.72133	1.74144e-05	0.00306884	0.00120661	21 x 12		7 p22	LFNG O-fucosylpeptide 3-beta-N-acetylglucosaminyltransferase [Source:HGNC Symbol;Acc:HGNC:6560]
270	ENSG00000127588	GNG13	-1.15416	-0.431889	-6.2792	1.74403e-05	0.00306884	0.00120769	29 x 31		16 p13	G protein subunit gamma 13 [Source:HGNC Symbol;Acc:HGNC:14131]
271	ENSG00000279700		-0.633435	-0.273022	-6.65631	1.75545e-05	0.00306884	0.00121248	7 x 23		12 q24
272	ENSG00000236703		-0.664157	-0.284038	-6.7247	1.75995e-05	0.00306884	0.00121436	10 x 35		6 q23	MYB antisense RNA 1 [Source:HGNC Symbol;Acc:HGNC:37457]
273	ENSG00000267339	LINC00906	-0.168369	-0.0811139	-5.76461	1.76627e-05	0.00306884	0.00121699	11 x 12		19 q12	long intergenic non-protein coding RNA 906 [Source:HGNC Symbol;Acc:HGNC:27121]
274	ENSG00000110092	CCND1	-2.12407	-0.570049	-6.86323	1.81023e-05	0.00306884	0.00123509	1 x 3	H	11 q13	cyclin D1 [Source:HGNC Symbol;Acc:HGNC:1582]
275	ENSG00000226942		-0.752963	-0.314721	-6.61227	1.83186e-05	0.00306884	0.00124386	5 x 23		16 p13	interleukin 9 receptor pseudogene 3 [Source:HGNC Symbol;Acc:HGNC:6033]
276	ENSG00000146233	CYP39A1	1.75533	1.21408	6.7468	1.83206e-05	0.00306884	0.00124394	34 x 21	B	6 p12	cytochrome P450 family 39 subfamily A member 1 [Source:HGNC Symbol;Acc:HGNC:17449]
277	ENSG00000267503		-0.622058	-0.268891	-6.42859	1.84315e-05	0.00306884	0.00124841	12 x 33		18 p11
278	ENSG00000152284	TCF7L1	1.54981	1.03719	6.753	1.85124e-05	0.00306884	0.00125165	32 x 24	B	2 p11	transcription factor 7 like 1 [Source:HGNC Symbol;Acc:HGNC:11640]
279	ENSG00000250387		-0.625206	-0.270037	-5.65079	1.85829e-05	0.00306884	0.00125447	14 x 35		5 q13	long intergenic non-protein coding RNA 2197 [Source:HGNC Symbol;Acc:HGNC:53063]
280	ENSG00000212766	EWSAT1	-1.78902	-0.545531	-6.57501	1.89327e-05	0.00306884	0.00126833	5 x 39	K	15 q23	Ewing sarcoma associated transcript 1 [Source:HGNC Symbol;Acc:HGNC:26596]
281	ENSG00000131773	KHDRBS3	2.13009	1.56039	6.96977	1.90486e-05	0.00306884	0.00127287	40 x 16	C	8 q24	KH RNA binding domain containing, signal transduction associated 3 [Source:HGNC Symbol;Acc:HGNC:18117]
282	ENSG00000144891	AGTR1	-1.83456	-0.550302	-6.22433	1.92456e-05	0.00306884	0.00128054	2 x 1		3 q24	angiotensin II receptor type 1 [Source:HGNC Symbol;Acc:HGNC:336]
283	ENSG00000162460	TMEM82	-0.485766	-0.217201	-5.83526	1.97072e-05	0.00306884	0.00129826	15 x 37		1 p36	transmembrane protein 82 [Source:HGNC Symbol;Acc:HGNC:32350]
284	ENSG00000180530	NRIP1	-1.30654	-0.467187	-6.66507	1.97397e-05	0.00306884	0.0012995	1 x 8	H	21 q21	nuclear receptor interacting protein 1 [Source:HGNC Symbol;Acc:HGNC:8001]
285	ENSG00000279281		-0.555004	-0.243966	-6.12919	1.99184e-05	0.00306884	0.00130625	12 x 27		17 q22
286	ENSG00000262919	FAM58A	0.646295	0.368808	6.60286	2.00669e-05	0.00306884	0.00131183	39 x 35		X q28	family with sequence similarity 58 member A [Source:HGNC Symbol;Acc:HGNC:28434]
287	ENSG00000131831	RAI2	-1.31515	-0.469031	-6.38393	2.0092e-05	0.00306884	0.00131277	12 x 40	K	X p22	retinoic acid induced 2 [Source:HGNC Symbol;Acc:HGNC:9835]
288	ENSG00000119636	BBOF1	-1.17007	-0.435811	-6.69976	2.01741e-05	0.00306884	0.00131583	4 x 40	K	14 q24	basal body orientation factor 1 [Source:HGNC Symbol;Acc:HGNC:19855]
289	ENSG00000073910	FRY	-1.15719	-0.432641	-6.64842	2.02226e-05	0.00306884	0.00131764	3 x 4	H	13 q13	FRY microtubule binding protein [Source:HGNC Symbol;Acc:HGNC:20367]
290	ENSG00000179978		-0.885787	-0.357401	-6.52818	2.0273e-05	0.00306884	0.00131951	3 x 23		5 q13
291	ENSG00000266256	LINC00683	-1.21976	-0.447706	-6.42014	2.02863e-05	0.00306884	0.00132	2 x 36		18 q23	long intergenic non-protein coding RNA 683 [Source:HGNC Symbol;Acc:HGNC:44467]
292	ENSG00000136457	CHAD	-2.70374	-0.554612	-6.56026	2.06307e-05	0.00306884	0.00133268	2 x 24		17 q21	chondroadherin [Source:HGNC Symbol;Acc:HGNC:1909]
293	ENSG00000227589		-0.498056	-0.222028	-6.37169	2.08045e-05	0.00306884	0.00133901	18 x 35		1 p36
294	ENSG00000263639	MSMB	-1.71978	-0.53741	-6.1615	2.08678e-05	0.00306884	0.0013413	9 x 38	K	10 q11	microseminoprotein beta [Source:HGNC Symbol;Acc:HGNC:7372]
295	ENSG00000235584		-2.58405	-0.563806	-6.57048	2.0894e-05	0.00306884	0.00134225	7 x 36		2 q11
296	ENSG00000197927		-1.08506	-0.414214	-6.53145	2.10295e-05	0.00306884	0.00134713	12 x 35		2 q21	chromosome 2 open reading frame 27A [Source:HGNC Symbol;Acc:HGNC:25077]
297	ENSG00000153234	NR4A2	-1.25659	-0.456174	-6.42053	2.1112e-05	0.00306884	0.00135009	11 x 37		2 q24	nuclear receptor subfamily 4 group A member 2 [Source:HGNC Symbol;Acc:HGNC:7981]
298	ENSG00000110693	SOX6	2.60066	2.03863	6.87105	2.11736e-05	0.00306884	0.0013523	30 x 24	B	11 p15	SRY-box 6 [Source:HGNC Symbol;Acc:HGNC:16421]
299	ENSG00000170959	DCDC1	-1.62811	-0.525048	-6.44274	2.14421e-05	0.00306884	0.00136183	2 x 40		11 p13	doublecortin domain containing 1 [Source:HGNC Symbol;Acc:HGNC:20625]
300	ENSG00000064547	LPAR2	0.673964	0.386632	6.47978	2.15545e-05	0.00306884	0.00136579	33 x 30		19 p13	lysophosphatidic acid receptor 2 [Source:HGNC Symbol;Acc:HGNC:3168]
301	ENSG00000279255		-0.835644	-0.341741	-6.53381	2.15546e-05	0.00359461	0.0013658	3 x 25		16 p13
302	ENSG00000091831	ESR1	-4.58375	0	-6.8203	2.19533e-05	0.00359461	0.00138136	10 x 40	K	6 q25	estrogen receptor 1 [Source:HGNC Symbol;Acc:HGNC:3467]
303	ENSG00000266127		-0.293436	-0.137362	-6.03917	2.23549e-05	0.00359461	0.0013968	12 x 17		18 p11	zinc finger protein 415 pseudogene 1 [Source:HGNC Symbol;Acc:HGNC:49869]
304	ENSG00000189157	FAM47E	-1.35463	-0.477277	-6.62062	2.31678e-05	0.00359461	0.00142743	4 x 39		4 q21	family with sequence similarity 47 member E [Source:HGNC Symbol;Acc:HGNC:34343]
305	ENSG00000178171	AMER3	-0.428154	-0.194132	-5.21414	2.33797e-05	0.00359461	0.00143527	1 x 34		2 q21	APC membrane recruitment protein 3 [Source:HGNC Symbol;Acc:HGNC:26771]
306	ENSG00000198947	DMD	1.61313	1.0907	6.65494	2.34536e-05	0.00359461	0.00143799	12 x 4		X p21	dystrophin [Source:HGNC Symbol;Acc:HGNC:2928]
307	ENSG00000157703	SVOPL	1.79464	1.24897	6.69342	2.361e-05	0.00359461	0.00144373	40 x 14	D	7 q34	SVOP like [Source:HGNC Symbol;Acc:HGNC:27034]
308	ENSG00000231133	HAR1B	-0.486842	-0.217625	-5.40715	2.38907e-05	0.00359461	0.00145395	20 x 11		20 q13	highly accelerated region 1B (non-protein coding) [Source:HGNC Symbol;Acc:HGNC:33118]
309	ENSG00000259725		-1.65569	-0.528961	-6.54305	2.39104e-05	0.00359461	0.00145467	10 x 37		16 q12
310	ENSG00000234869		-0.977166	-0.384529	-6.38085	2.39179e-05	0.00359461	0.00145494	9 x 33		22 q13
311	ENSG00000278621		-2.24028	-0.57283	-6.46913	2.4033e-05	0.00359461	0.0014591	2 x 3	H	15 q14
312	ENSG00000256618	MTRNR2L1	-1.40665	-0.48762	-5.49794	2.40589e-05	0.00359461	0.00146003	26 x 40		17 p11	MT-RNR2-like 1 [Source:HGNC Symbol;Acc:HGNC:37155]
313	ENSG00000173013	CCDC96	-1.27965	-0.461328	-6.63082	2.40658e-05	0.00359461	0.00146028	2 x 40		4 p16	coiled-coil domain containing 96 [Source:HGNC Symbol;Acc:HGNC:26900]
314	ENSG00000267690	LDLRAD4-AS1	-1.17947	-0.438104	-6.36181	2.45036e-05	0.00359461	0.00147594	3 x 25		18 p11	LDLRAD4 antisense RNA 1 [Source:HGNC Symbol;Acc:HGNC:48592]
315	ENSG00000184384	MAML2	1.30336	0.837205	6.63528	2.46519e-05	0.00359461	0.00148119	10 x 6		11 q21	mastermind like transcriptional coactivator 2 [Source:HGNC Symbol;Acc:HGNC:16259]
316	ENSG00000101210	EEF1A2	-3.72416	-0.349289	-6.62268	2.46692e-05	0.00359461	0.0014818	1 x 2	H	20 q13	eukaryotic translation elongation factor 1 alpha 2 [Source:HGNC Symbol;Acc:HGNC:3192]
317	ENSG00000218416	PP14571	-2.51407	-0.567734	-6.53708	2.51149e-05	0.00359461	0.00149742	1 x 2	H	2 q37	uncharacterized LOC100130449 [Source:NCBI gene;Acc:100130449]
318	ENSG00000148468	FAM171A1	1.96806	1.40691	6.71105	2.5115e-05	0.00359461	0.00149742	23 x 24		10 p13	family with sequence similarity 171 member A1 [Source:HGNC Symbol;Acc:HGNC:23522]
319	ENSG00000196371	FUT4	0.909002	0.544777	6.5952	2.55959e-05	0.00359461	0.00151402	35 x 20		11 q21	fucosyltransferase 4 [Source:HGNC Symbol;Acc:HGNC:4015]
320	ENSG00000069020	MAST4	-1.4588	-0.497397	-6.57369	2.56815e-05	0.00359461	0.00151695	2 x 5	H	5 q12	microtubule associated serine/threonine kinase family member 4 [Source:HGNC Symbol;Acc:HGNC:19037]
321	ENSG00000245156		-0.453566	-0.204397	-6.27195	2.59168e-05	0.00359461	0.00152495	9 x 21		11 q13
322	ENSG00000235049	LINC00940	-1.5544	-0.513779	-6.45837	2.62153e-05	0.00359461	0.00153501	4 x 37		12 p13	long intergenic non-protein coding RNA 940 [Source:HGNC Symbol;Acc:HGNC:48634]
323	ENSG00000115648	MLPH	-2.98406	-0.520844	-6.67001	2.66628e-05	0.00359461	0.00154992	10 x 40	K	2 q37	melanophilin [Source:HGNC Symbol;Acc:HGNC:29643]
324	ENSG00000122068	FYTTD1	0.44656	0.245097	6.39919	2.66916e-05	0.00359461	0.00155087	29 x 16		3 q29	forty-two-three domain containing 1 [Source:HGNC Symbol;Acc:HGNC:25407]
325	ENSG00000169891	REPS2	-1.18158	-0.438616	-6.13	2.67344e-05	0.00359461	0.00155228	8 x 40	K	X p22	RALBP1 associated Eps domain containing 2 [Source:HGNC Symbol;Acc:HGNC:9963]
326	ENSG00000134595	SOX3	-0.397128	-0.181409	-5.462	2.67683e-05	0.00359461	0.0015534	28 x 29		X q27	SRY-box 3 [Source:HGNC Symbol;Acc:HGNC:11199]
327	ENSG00000089177	KIF16B	-1.01269	-0.394583	-6.40985	2.6854e-05	0.00359461	0.00155622	1 x 19		20 p12	kinesin family member 16B [Source:HGNC Symbol;Acc:HGNC:15869]
328	ENSG00000279427		-1.42071	-0.490314	-6.44673	2.68722e-05	0.00359461	0.00155682	7 x 38	K	16 q12
329	ENSG00000117472	TSPAN1	-3.14357	-0.493975	-6.61627	2.71209e-05	0.00359461	0.00156495	8 x 40	K	1 p34	tetraspanin 1 [Source:HGNC Symbol;Acc:HGNC:20657]
330	ENSG00000229320		0.815476	0.480404	6.53788	2.72322e-05	0.00359461	0.00156857	30 x 33		3 q25	keratin 8 pseudogene 12 [Source:HGNC Symbol;Acc:HGNC:28057]
331	ENSG00000173041	ZNF680	-0.69186	-0.293794	-6.24553	2.74924e-05	0.00359461	0.00157698	2 x 17		7 q11	zinc finger protein 680 [Source:HGNC Symbol;Acc:HGNC:26897]
332	ENSG00000070759	TESK2	-0.972854	-0.38329	-6.35192	2.76939e-05	0.00359461	0.00158345	1 x 18		1 p34	testis-specific kinase 2 [Source:HGNC Symbol;Acc:HGNC:11732]
333	ENSG00000250643		-0.919497	-0.367621	-6.08962	2.77943e-05	0.00359461	0.00158666	13 x 40		3 q22
334	ENSG00000259278		-0.509963	-0.226674	-6.19977	2.78778e-05	0.00359461	0.00158932	24 x 33		15 q14
335	ENSG00000182648	C7orf13	1.37432	0.893424	6.46811	2.80585e-05	0.00359461	0.00159505	32 x 28		7 q36	long intergenic non-protein coding RNA 1006 [Source:HGNC Symbol;Acc:HGNC:48971]
336	ENSG00000183474	GTF2H2C	-0.548224	-0.241392	-6.23121	2.8151e-05	0.0038735	0.00159797	1 x 15	I	5 q13	GTF2H2 family member C [Source:HGNC Symbol;Acc:HGNC:31394]
337	ENSG00000187589		-0.277971	-0.130592	-5.95092	2.85726e-05	0.0038735	0.00161194	19 x 35		18 p11	telomeric repeat binding factor 1 pseudogene 2 [Source:HGNC Symbol;Acc:HGNC:38110]
338	ENSG00000170324	FRMPD2	-0.851089	-0.346623	-6.06582	2.87656e-05	0.0038735	0.00161828	1 x 38		10 q11	FERM and PDZ domain containing 2 [Source:HGNC Symbol;Acc:HGNC:28572]
339	ENSG00000249661		-2.65326	-0.558871	-6.37773	2.90556e-05	0.0038735	0.00162774	2 x 23		4 q31	trinucleotide repeat containing 18 pseudogene 1 [Source:HGNC Symbol;Acc:HGNC:43881]
340	ENSG00000265888	DSCAS	0.431497	0.236121	6.31448	2.92654e-05	0.0038735	0.00163453	18 x 27		18 q12	DSC1/DSC2 antisense RNA [Source:HGNC Symbol;Acc:HGNC:51116]
341	ENSG00000111728	ST8SIA1	1.51873	1.01123	6.45967	2.93065e-05	0.0038735	0.00163586	29 x 1		12 p12	ST8 alpha-N-acetyl-neuraminide alpha-2,8-sialyltransferase 1 [Source:HGNC Symbol;Acc:HGNC:10869]
342	ENSG00000257261		-0.949817	-0.376601	-6.4293	2.95145e-05	0.0038735	0.00164254	18 x 40		12 q13
343	ENSG00000171962	DRC3	-1.21919	-0.447574	-6.39018	2.95726e-05	0.00448714	0.00164441	2 x 40		17 p11	dynein regulatory complex subunit 3 [Source:HGNC Symbol;Acc:HGNC:25384]
344	ENSG00000116014	KISS1R	-1.46137	-0.497863	-6.21758	2.99534e-05	0.00448714	0.00165776	14 x 40		19 p13	KISS1 receptor [Source:HGNC Symbol;Acc:HGNC:4510]
345	ENSG00000166002	SMCO4	1.14642	0.716765	6.44492	3.01021e-05	0.00448714	0.00166294	37 x 11		11 q21	single-pass membrane protein with coiled-coil domains 4 [Source:HGNC Symbol;Acc:HGNC:24810]
346	ENSG00000244274	DBNDD2	-1.06729	-0.4095	-6.29762	3.0957e-05	0.00448714	0.00169235	6 x 33		20 q13	dysbindin domain containing 2 [Source:HGNC Symbol;Acc:HGNC:15881]
347	ENSG00000279903		-0.37507	-0.172235	-5.89648	3.09646e-05	0.00448714	0.00169261	13 x 35		8 p22
348	ENSG00000121644	DESI2	0.820007	0.483479	6.47255	3.11556e-05	0.00448714	0.0016991	30 x 20		1 q44	desumoylating isopeptidase 2 [Source:HGNC Symbol;Acc:HGNC:24264]
349	ENSG00000254349	MIR2052HG	-1.02283	-0.397402	-5.90093	3.13385e-05	0.00448714	0.00170528	3 x 35		8 q21	MIR2052 host gene [Source:HGNC Symbol;Acc:HGNC:51555]
350	ENSG00000171903	CYP4F11	-2.17818	-0.571711	-6.35346	3.18596e-05	0.00448714	0.00172275	11 x 40	K	19 p13	cytochrome P450 family 4 subfamily F member 11 [Source:HGNC Symbol;Acc:HGNC:13265]
351	ENSG00000241359	SYNPR-AS1	-0.970381	-0.382577	-6.13128	3.23545e-05	0.00448714	0.00173914	6 x 38	K	3 p14	SYNPR antisense RNA 1 [Source:HGNC Symbol;Acc:HGNC:40774]
352	ENSG00000175895	PLEKHF2	-1.13495	-0.427079	-6.3803	3.2557e-05	0.00448714	0.00174579	12 x 40	K	8 q22	pleckstrin homology and FYVE domain containing 2 [Source:HGNC Symbol;Acc:HGNC:20757]
353	ENSG00000152359	POC5	-0.680648	-0.289866	-6.45701	3.25688e-05	0.00448714	0.00174618	1 x 17		5 q13	POC5 centriolar protein [Source:HGNC Symbol;Acc:HGNC:26658]
354	ENSG00000094755	GABRP	4.57217	4.56761	6.51583	3.26474e-05	0.00448714	0.00174875	40 x 11	D	5 q35	gamma-aminobutyric acid type A receptor pi subunit [Source:HGNC Symbol;Acc:HGNC:4089]
355	ENSG00000101311	FERMT1	2.58684	2.0239	6.49228	3.27234e-05	0.00448714	0.00175123	11 x 5		20 p12	fermitin family member 1 [Source:HGNC Symbol;Acc:HGNC:15889]
356	ENSG00000227186		-0.314033	-0.146298	-6.08692	3.30906e-05	0.00448714	0.00176316	10 x 17		10 q22
357	ENSG00000171428	NAT1	-2.92572	-0.529284	-6.33706	3.36174e-05	0.00448714	0.0017801	9 x 38	K	8 p22	N-acetyltransferase 1 [Source:HGNC Symbol;Acc:HGNC:7645]
358	ENSG00000197415	VEPH1	1.09756	0.680367	6.03671	3.36601e-05	0.00448714	0.00178146	32 x 22	B	3 q25	ventricular zone expressed PH domain containing 1 [Source:HGNC Symbol;Acc:HGNC:25735]
359	ENSG00000257379		-0.47616	-0.213405	-6.25155	3.36745e-05	0.00448714	0.00178192	7 x 14		12 q13
360	ENSG00000240875	LINC00886	-1.12858	-0.425466	-6.17005	3.40522e-05	0.00448714	0.00179391	4 x 31		3 q25	long intergenic non-protein coding RNA 886 [Source:HGNC Symbol;Acc:HGNC:48572]
361	ENSG00000182175	RGMA	2.11607	1.54688	6.46984	3.41258e-05	0.00448714	0.00179624	31 x 25	B	15 q26	repulsive guidance molecule family member a [Source:HGNC Symbol;Acc:HGNC:30308]
362	ENSG00000213145	CRIP1	-1.54592	-0.512406	-6.36384	3.43769e-05	0.00448714	0.00180414	15 x 40		14 q32	cysteine rich protein 1 [Source:HGNC Symbol;Acc:HGNC:2360]
363	ENSG00000248445		-0.598708	-0.260323	-6.1487	3.44969e-05	0.00448714	0.0018079	4 x 25		5 q23	SEMA6A antisense RNA 1 [Source:HGNC Symbol;Acc:HGNC:51110]
364	ENSG00000258551	CRAT37	-0.660458	-0.282722	-5.72729	3.53506e-05	0.00448714	0.00183435	9 x 35		15 q26	cervical cancer-associated transcript 37 [Source:NCBI gene;Acc:101926928]
365	ENSG00000207146		-0.654169	-0.280479	-5.9874	3.61166e-05	0.00448714	0.00185765	1 x 24		X q22	Y RNA [Source:RFAM;Acc:RF00019]
366	ENSG00000157999	ANKRD61	-0.458	-0.206174	-6.02772	3.61282e-05	0.00448714	0.00185799	6 x 21		7 p22	ankyrin repeat domain 61 [Source:HGNC Symbol;Acc:HGNC:22467]
367	ENSG00000230873	STMND1	-2.42985	-0.571044	-6.29051	3.65889e-05	0.00448714	0.0018718	4 x 39		6 p22	stathmin domain containing 1 [Source:HGNC Symbol;Acc:HGNC:44668]
368	ENSG00000214313	AZGP1P1	-1.8997	-0.55634	-6.30928	3.66453e-05	0.00448714	0.00187349	7 x 38	K	7 q22	alpha-2-glycoprotein 1, zinc-binding pseudogene 1 [Source:HGNC Symbol;Acc:HGNC:911]
369	ENSG00000186526	CYP4F8	-2.05723	-0.567113	-5.95479	3.71822e-05	0.00448714	0.00188937	8 x 36		19 p13	cytochrome P450 family 4 subfamily F member 8 [Source:HGNC Symbol;Acc:HGNC:2648]
370	ENSG00000232872		-0.739714	-0.310253	-6.22426	3.73089e-05	0.00448714	0.0018931	2 x 21		13 q14	CTAGE family member 3, pseudogene [Source:HGNC Symbol;Acc:HGNC:24348]
371	ENSG00000131914	LIN28A	-0.517218	-0.229489	-4.89687	3.7343e-05	0.00448714	0.0018941	30 x 30		1 p36	lin-28 homolog A [Source:HGNC Symbol;Acc:HGNC:15986]
372	ENSG00000112077	RHAG	-0.304449	-0.142152	-5.51693	3.7653e-05	0.00448714	0.00190315	20 x 34		6 p12	Rh-associated glycoprotein [Source:HGNC Symbol;Acc:HGNC:10006]
373	ENSG00000175155	YPEL2	-0.996407	-0.390009	-6.28861	3.77818e-05	0.00448714	0.00190689	1 x 12	I	17 q22	yippee like 2 [Source:HGNC Symbol;Acc:HGNC:18326]
374	ENSG00000228420		-0.522747	-0.231627	-5.46789	3.80595e-05	0.00448714	0.00191493	9 x 34		1 p13	long intergenic non-protein coding RNA 1768 [Source:HGNC Symbol;Acc:HGNC:52558]
375	ENSG00000260810		-0.921266	-0.36815	-6.15121	3.85522e-05	0.00448714	0.00192906	9 x 35		14 q32
376	ENSG00000197670		-0.567835	-0.248812	-5.74553	3.8712e-05	0.00448714	0.00193361	6 x 21		20 q13
377	ENSG00000150361	KLHL1	-0.604072	-0.262302	-4.86551	3.88407e-05	0.00448714	0.00193727	5 x 35		13 q21	kelch like family member 1 [Source:HGNC Symbol;Acc:HGNC:6352]
378	ENSG00000234899	SOX9-AS1	2.48783	1.91956	6.40225	3.90658e-05	0.00448714	0.00194363	22 x 25		17 q24	SOX9 antisense RNA 1 [Source:HGNC Symbol;Acc:HGNC:49321]
379	ENSG00000271425	NBPF10	-0.525907	-0.232846	-6.01663	3.95272e-05	0.00448714	0.00195658	7 x 20		1 q21	NBPF member 10 [Source:HGNC Symbol;Acc:HGNC:31992]
380	ENSG00000138613	APH1B	-1.08663	-0.414627	-6.25692	3.96869e-05	0.00448714	0.00196103	6 x 36		15 q22	aph-1 homolog B, gamma-secretase subunit [Source:HGNC Symbol;Acc:HGNC:24080]
381	ENSG00000275981		-0.453032	-0.204183	-5.80496	3.98061e-05	0.00448714	0.00196434	11 x 35		3 p26
382	ENSG00000179222	MAGED1	0.615322	0.349054	5.92931	4.03853e-05	0.00448714	0.00198031	23 x 10		X p11	MAGE family member D1 [Source:HGNC Symbol;Acc:HGNC:6813]
383	ENSG00000138115	CYP2C8	-0.743335	-0.311478	-5.59648	4.04387e-05	0.00448714	0.00198177	3 x 28		10 q23	cytochrome P450 family 2 subfamily C member 8 [Source:HGNC Symbol;Acc:HGNC:2622]
384	ENSG00000181467	RAP2B	0.704125	0.406252	6.24799	4.04465e-05	0.00448714	0.00198198	36 x 10		3 q25	RAP2B, member of RAS oncogene family [Source:HGNC Symbol;Acc:HGNC:9862]
385	ENSG00000102886	GDPD3	-0.948734	-0.376284	-5.62885	4.04795e-05	0.00448714	0.00198288	15 x 40		16 p11	glycerophosphodiester phosphodiesterase domain containing 3 [Source:HGNC Symbol;Acc:HGNC:28638]
386	ENSG00000076344	RGS11	-1.85217	-0.552026	-6.26644	4.06276e-05	0.00448714	0.00198693	13 x 40		16 p13	regulator of G protein signaling 11 [Source:HGNC Symbol;Acc:HGNC:9993]
387	ENSG00000262020		-0.224181	-0.106637	-5.52862	4.07133e-05	0.00448714	0.00198926	13 x 18		16 p13
388	ENSG00000066777	ARFGEF1	-0.524571	-0.232331	-5.77022	4.07281e-05	0.00448714	0.00198966	1 x 10	I	8 q13	ADP ribosylation factor guanine nucleotide exchange factor 1 [Source:HGNC Symbol;Acc:HGNC:15772]
389	ENSG00000055147	FAM114A2	-0.525499	-0.232689	-6.0886	4.07368e-05	0.00448714	0.0019899	1 x 14	I	5 q33	family with sequence similarity 114 member A2 [Source:HGNC Symbol;Acc:HGNC:1333]
390	ENSG00000259394		0.386349	0.209512	6.1304	4.07886e-05	0.00448714	0.00199131	25 x 37		15 q22
391	ENSG00000273062		-1.00558	-0.392592	-6.22472	4.09544e-05	0.00448714	0.0019958	8 x 37		1 q25
392	ENSG00000186868	MAPT	-3.08617	-0.504283	-6.29634	4.12454e-05	0.00448714	0.00200365	2 x 1		17 q21	microtubule associated protein tau [Source:HGNC Symbol;Acc:HGNC:6893]
393	ENSG00000100473	COCH	3.11212	2.61324	6.4091	4.13358e-05	0.00622745	0.00200608	35 x 25	B	14 q12	cochlin [Source:HGNC Symbol;Acc:HGNC:2180]
394	ENSG00000246228	CASC8	1.36019	0.882143	6.13312	4.18199e-05	0.00622745	0.00202194	40 x 13	D	8 q24	cancer susceptibility 8 (non-protein coding) [Source:HGNC Symbol;Acc:HGNC:45129]
395	ENSG00000160180	TFF3	-4.23364	-0.161726	-6.31741	4.29252e-05	0.00622745	0.00205772	7 x 40	K	21 q22	trefoil factor 3 [Source:HGNC Symbol;Acc:HGNC:11757]
396	ENSG00000074211	PPP2R2C	-3.03369	-0.513079	-6.16063	4.30178e-05	0.00622745	0.00206069	1 x 36		4 p16	protein phosphatase 2 regulatory subunit Bgamma [Source:HGNC Symbol;Acc:HGNC:9306]
397	ENSG00000166770		1.29968	0.834315	6.06848	4.45844e-05	0.00622745	0.00211031	23 x 25		19 q13	ZNF667 antisense RNA 1 (head to head) [Source:HGNC Symbol;Acc:HGNC:44321]
398	ENSG00000238358		-0.425449	-0.193031	-5.33228	4.55027e-05	0.00622745	0.00213885	9 x 34		7 q21
399	ENSG00000180777	ANKRD30B	-2.7474	-0.550481	-6.14923	4.55448e-05	0.00622745	0.00214015	7 x 35		18 p11	ankyrin repeat domain 30B [Source:HGNC Symbol;Acc:HGNC:24165]
400	ENSG00000157827	FMNL2	1.16041	0.727283	6.20998	4.61968e-05	0.00622745	0.00216016	10 x 7		2 q23	formin like 2 [Source:HGNC Symbol;Acc:HGNC:18267]
401	ENSG00000254363	LOC101929719	-0.757502	-0.316243	-5.88144	4.64197e-05	0.00622745	0.00216695	7 x 24		5 q31
402	ENSG00000127585	FBXL16	-2.51926	-0.567479	-6.26575	4.66367e-05	0.00622745	0.00217355	14 x 40		16 p13	F-box and leucine rich repeat protein 16 [Source:HGNC Symbol;Acc:HGNC:14150]
403	ENSG00000145491	ROPN1L	-1.08284	-0.413627	-5.93453	4.68329e-05	0.00622745	0.00217949	1 x 40		5 p15	rhophilin associated tail protein 1 like [Source:HGNC Symbol;Acc:HGNC:24060]
404	ENSG00000149926	FAM57B	-1.18035	-0.438317	-5.91023	4.69339e-05	0.00622745	0.00218254	8 x 34		16 p11	family with sequence similarity 57 member B [Source:HGNC Symbol;Acc:HGNC:25295]
405	ENSG00000248585		-0.252553	-0.119351	-5.57857	4.73766e-05	0.00622745	0.00219587	14 x 17		8 p11
406	ENSG00000196166	C8orf86	-0.848588	-0.345836	-5.79316	4.78179e-05	0.00622745	0.00220907	5 x 35		8 p11	chromosome 8 open reading frame 86 [Source:HGNC Symbol;Acc:HGNC:33774]
407	ENSG00000120137	PANK3	-0.656493	-0.281309	-5.91221	4.78329e-05	0.00622745	0.00220952	1 x 13	I	5 q34	pantothenate kinase 3 [Source:HGNC Symbol;Acc:HGNC:19365]
408	ENSG00000170298	LGALS9B	-0.713231	-0.301206	-5.51212	4.80966e-05	0.00622745	0.00221736	11 x 38		17 p11	galectin 9B [Source:HGNC Symbol;Acc:HGNC:24842]
409	ENSG00000092621	PHGDH	2.13695	1.56701	6.17815	4.87127e-05	0.00622745	0.00223557	34 x 26	B	1 p12	phosphoglycerate dehydrogenase [Source:HGNC Symbol;Acc:HGNC:8923]
410	ENSG00000211452	DIO1	-2.19884	-0.572177	-5.90965	4.88546e-05	0.00622745	0.00223974	9 x 40	K	1 p32	iodothyronine deiodinase 1 [Source:HGNC Symbol;Acc:HGNC:2883]
411	ENSG00000268104	SLC6A14	3.76651	3.43166	6.27184	4.91583e-05	0.00622745	0.00224863	40 x 19	C	X q23	solute carrier family 6 member 14 [Source:HGNC Symbol;Acc:HGNC:11047]
412	ENSG00000118492	ADGB	-0.568167	-0.248937	-5.62329	4.92006e-05	0.00622745	0.00224987	1 x 40		6 q24	androglobin [Source:HGNC Symbol;Acc:HGNC:21212]
413	ENSG00000272682		0.491169	0.271972	6.11436	4.95349e-05	0.00622745	0.00225961	18 x 27		22 q11
414	ENSG00000144354	CDCA7	2.46376	1.89452	6.19686	4.98095e-05	0.00622745	0.00226757	40 x 24	C	2 q31	cell division cycle associated 7 [Source:HGNC Symbol;Acc:HGNC:14628]
415	ENSG00000075275	CELSR1	-1.66558	-0.530323	-6.14726	5.02528e-05	0.00622745	0.00228036	1 x 7	H	22 q13	cadherin EGF LAG seven-pass G-type receptor 1 [Source:HGNC Symbol;Acc:HGNC:1850]
416	ENSG00000166225	FRS2	-0.979983	-0.385336	-6.02926	5.05472e-05	0.00622745	0.00228882	1 x 17		12 q15	fibroblast growth factor receptor substrate 2 [Source:HGNC Symbol;Acc:HGNC:16971]
417	ENSG00000254042		-1.02484	-0.397958	-5.92105	5.06176e-05	0.00622745	0.00229083	1 x 24		5 q34
418	ENSG00000154316	TDH	-0.439894	-0.198892	-5.54479	5.07867e-05	0.00622745	0.00229566	16 x 15		8 p23	L-threonine dehydrogenase (pseudogene) [Source:HGNC Symbol;Acc:HGNC:15547]
419	ENSG00000162543	UBXN10	-1.95113	-0.560452	-6.1081	5.10608e-05	0.00622745	0.00230347	3 x 40		1 p36	UBX domain protein 10 [Source:HGNC Symbol;Acc:HGNC:26354]
420	ENSG00000091640	SPAG7	-0.366921	-0.16882	-5.61557	5.16351e-05	0.00622745	0.00231972	33 x 35		17 p13	sperm associated antigen 7 [Source:HGNC Symbol;Acc:HGNC:11216]
421	ENSG00000270930		-1.40253	-0.486822	-5.92068	5.19466e-05	0.00622745	0.00232849	8 x 36		2 q21	GRAM domain containing 4 pseudogene 8 [Source:HGNC Symbol;Acc:HGNC:49143]
422	ENSG00000147535	PLPP5	-0.922662	-0.368568	-5.88565	5.20507e-05	0.00622745	0.00233141	9 x 33		8 p11	phospholipid phosphatase 5 [Source:HGNC Symbol;Acc:HGNC:25026]
423	ENSG00000136295	TTYH3	0.832546	0.492012	6.04046	5.21012e-05	0.00622745	0.00233282	22 x 9		7 p22	tweety family member 3 [Source:HGNC Symbol;Acc:HGNC:22222]
424	ENSG00000196396	PTPN1	-0.585003	-0.255239	-5.64219	5.28951e-05	0.00622745	0.00235493	25 x 14		20 q13	protein tyrosine phosphatase, non-receptor type 1 [Source:HGNC Symbol;Acc:HGNC:9642]
425	ENSG00000253125		-2.53247	-0.566805	-6.08164	5.29348e-05	0.00622745	0.00235602	7 x 38	K	8 p21
426	ENSG00000215912	TTC34	-0.78496	-0.325355	-5.76051	5.3136e-05	0.00622745	0.00236158	5 x 27		1 p36	tetratricopeptide repeat domain 34 [Source:HGNC Symbol;Acc:HGNC:34297]
427	ENSG00000163746	PLSCR2	0.923256	0.554756	6.11567	5.35532e-05	0.00622745	0.00237306	19 x 26		3 q24	phospholipid scramblase 2 [Source:HGNC Symbol;Acc:HGNC:16494]
428	ENSG00000197763	TXNRD3	0.641427	0.36569	5.9151	5.40989e-05	0.00622745	0.00238797	36 x 18		3 q21	thioredoxin reductase 3 [Source:HGNC Symbol;Acc:HGNC:20667]
429	ENSG00000237330	RNF223	-1.24834	-0.454305	-5.95303	5.41633e-05	0.00622745	0.00238972	22 x 13		1 p36	ring finger protein 223 [Source:HGNC Symbol;Acc:HGNC:40020]
430	ENSG00000174992	ZG16	-0.460334	-0.207107	-5.28904	5.44653e-05	0.00622745	0.00239791	22 x 34		16 p11	zymogen granule protein 16 [Source:HGNC Symbol;Acc:HGNC:30961]
431	ENSG00000155545	MIER3	-0.664589	-0.284191	-6.0091	5.44754e-05	0.00622745	0.00239819	1 x 15	I	5 q11	MIER family member 3 [Source:HGNC Symbol;Acc:HGNC:26678]
432	ENSG00000065371	ROPN1	3.94502	3.67113	6.25289	5.46513e-05	0.00622745	0.00240294	22 x 24		3 q21	rhophilin associated tail protein 1 [Source:HGNC Symbol;Acc:HGNC:17692]
433	ENSG00000243635		-0.41638	-0.189329	-5.54065	5.48142e-05	0.00622745	0.00240734	16 x 34		3 q13
434	ENSG00000164219	PGGT1B	-0.671575	-0.286667	-6.0684	5.55195e-05	0.00622745	0.00242624	1 x 15	I	5 q22	protein geranylgeranyltransferase type I subunit beta [Source:HGNC Symbol;Acc:HGNC:8895]
435	ENSG00000242265	PEG10	1.95083	1.39092	5.60607	5.56446e-05	0.00622745	0.00242958	32 x 23	B	7 q21	paternally expressed 10 [Source:HGNC Symbol;Acc:HGNC:14005]
436	ENSG00000145782	ATG12	-0.621549	-0.268705	-6.12629	5.58901e-05	0.00622745	0.0024361	14 x 34		5 q22	autophagy related 12 [Source:HGNC Symbol;Acc:HGNC:588]
437	ENSG00000241358		0.549667	0.307872	5.99952	5.62939e-05	0.00622745	0.00244679	19 x 29		3 q24
438	ENSG00000248429	LOC285505	-1.91187	-0.557365	-6.08316	5.65345e-05	0.00622745	0.00245313	1 x 2	H	4 q32
439	ENSG00000261857	MIA	3.35241	2.90289	6.20548	5.75443e-05	0.00622745	0.0024795	39 x 19	C	19 q13	melanoma inhibitory activity [Source:HGNC Symbol;Acc:HGNC:7076]
440	ENSG00000140025	EFCAB11	-0.763608	-0.318284	-6.01106	5.78605e-05	0.00622745	0.00248768	8 x 37		14 q32	EF-hand calcium binding domain 11 [Source:HGNC Symbol;Acc:HGNC:20357]
441	ENSG00000268204		-1.25066	-0.454832	-6.00306	5.88e-05	0.00622745	0.00251178	4 x 27		19 p13
442	ENSG00000069812	HES2	-0.944349	-0.374996	-5.35457	5.89362e-05	0.00622745	0.00251525	22 x 12		1 p36	hes family bHLH transcription factor 2 [Source:HGNC Symbol;Acc:HGNC:16005]
443	ENSG00000145916	RMND5B	-0.765203	-0.318815	-6.027	5.92203e-05	0.00622745	0.00252246	17 x 39		5 q35	required for meiotic nuclear division 5 homolog B [Source:HGNC Symbol;Acc:HGNC:26181]
444	ENSG00000132746	ALDH3B2	-1.48424	-0.501952	-5.68749	5.96506e-05	0.00622745	0.00253334	11 x 40	K	11 q13	aldehyde dehydrogenase 3 family member B2 [Source:HGNC Symbol;Acc:HGNC:411]
445	ENSG00000112079	STK38	0.690785	0.39755	6.00746	6.00023e-05	0.00622745	0.00254217	27 x 19		6 p21	serine/threonine kinase 38 [Source:HGNC Symbol;Acc:HGNC:17847]
446	ENSG00000266801		0.214007	0.112029	5.45679	6.00187e-05	0.00622745	0.00254258	15 x 14		16 q22
447	ENSG00000143674	MAP3K21	1.61546	1.09269	6.0207	6.00655e-05	0.00622745	0.00254376	23 x 23		1 q42	mitogen-activated protein kinase kinase kinase 21 [Source:HGNC Symbol;Acc:HGNC:29798]
448	ENSG00000250167		-0.679004	-0.289288	-5.34845	6.13264e-05	0.00622745	0.00257508	8 x 35		5 q31
449	ENSG00000102302	FGD1	0.994544	0.605327	6.04864	6.23427e-05	0.00622745	0.00259993	31 x 28		X p11	FYVE, RhoGEF and PH domain containing 1 [Source:HGNC Symbol;Acc:HGNC:3663]
450	ENSG00000264491		-0.751732	-0.314308	-5.87021	6.28448e-05	0.00622745	0.00261209	8 x 18		17 q24
451	ENSG00000246985	SOCS2-AS1	-0.928413	-0.370282	-5.49364	6.28555e-05	0.00622745	0.00261235	15 x 6		12 q22	SOCS2 antisense RNA 1 [Source:HGNC Symbol;Acc:HGNC:27054]
452	ENSG00000110925	CSRNP2	-0.558049	-0.24512	-5.90312	6.29333e-05	0.00622745	0.00261423	2 x 18		12 q13	cysteine and serine rich nuclear protein 2 [Source:HGNC Symbol;Acc:HGNC:16006]
453	ENSG00000230280		-0.430862	-0.195233	-5.65744	6.35569e-05	0.00622745	0.00262919	5 x 21		1 q32	heterogeneous nuclear ribonucleoprotein A1 pseudogene 59 [Source:HGNC Symbol;Acc:HGNC:48789]
454	ENSG00000135549	PKIB	-1.67614	-0.531755	-5.89269	6.36393e-05	0.00622745	0.00263116	12 x 40	K	6 q22	cAMP-dependent protein kinase inhibitor beta [Source:HGNC Symbol;Acc:HGNC:9018]
455	ENSG00000272323		-1.00943	-0.393671	-5.97325	6.37542e-05	0.00622745	0.0026339	5 x 35		5 p13
456	ENSG00000260686		-0.99278	-0.388982	-5.93783	6.43471e-05	0.00622745	0.00264798	3 x 31		5 q23
457	ENSG00000144597	EAF1	-0.504909	-0.224706	-5.77999	6.50272e-05	0.00622745	0.002664	1 x 12	I	3 p25	ELL associated factor 1 [Source:HGNC Symbol;Acc:HGNC:20907]
458	ENSG00000135374	ELF5	3.85461	3.54898	6.05554	6.51361e-05	0.00622745	0.00266655	39 x 20	C	11 p13	E74 like ETS transcription factor 5 [Source:HGNC Symbol;Acc:HGNC:3320]
459	ENSG00000130881	LRP3	0.877728	0.52304	5.9889	6.54219e-05	0.00622745	0.00267323	20 x 12		19 q13	LDL receptor related protein 3 [Source:HGNC Symbol;Acc:HGNC:6695]
460	ENSG00000117280	RAB29	0.697818	0.402133	5.69426	6.55731e-05	0.00622745	0.00267675	32 x 21		1 q32	RAB29, member RAS oncogene family [Source:HGNC Symbol;Acc:HGNC:9789]
461	ENSG00000149231	CCDC82	0.880564	0.525002	5.95234	6.55941e-05	0.00622745	0.00267724	35 x 18		11 q21	coiled-coil domain containing 82 [Source:HGNC Symbol;Acc:HGNC:26282]
462	ENSG00000169740	ZNF32	0.36296	0.195902	5.63794	6.56905e-05	0.00622745	0.00267948	34 x 36		10 q11	zinc finger protein 32 [Source:HGNC Symbol;Acc:HGNC:13095]
463	ENSG00000272485		-0.523241	-0.231818	-5.65195	6.63833e-05	0.00622745	0.0026955	12 x 35		6 p25
464	ENSG00000165568	AKR1E2	1.74178	1.20214	6.01143	6.63998e-05	0.00622745	0.00269588	34 x 24	B	10 p15	aldo-keto reductase family 1 member E2 [Source:HGNC Symbol;Acc:HGNC:23437]
465	ENSG00000275532		-0.425271	-0.192959	-5.63882	6.66521e-05	0.00622745	0.00270168	7 x 32		17 q12
466	ENSG00000138696	BMPR1B	-2.66364	-0.558041	-5.68591	6.6765e-05	0.00622745	0.00270427	4 x 36		4 q22	bone morphogenetic protein receptor type 1B [Source:HGNC Symbol;Acc:HGNC:1077]
467	ENSG00000154252	GAL3ST2	-1.0537	-0.405847	-5.55274	6.69364e-05	0.00622745	0.0027082	23 x 15		2 q37	galactose-3-O-sulfotransferase 2 [Source:HGNC Symbol;Acc:HGNC:24869]
468	ENSG00000106541	AGR2	-4.04571	-0.237505	-6.04194	6.74889e-05	0.00622745	0.00272078	8 x 40	K	7 p21	anterior gradient 2, protein disulphide isomerase family member [Source:HGNC Symbol;Acc:HGNC:328]
469	ENSG00000272779		0.632883	0.360229	5.97882	6.74903e-05	0.00622745	0.00272082	32 x 15		22 q11
470	ENSG00000145723	GIN1	-0.646519	-0.277739	-5.97101	6.77893e-05	0.00622745	0.00272759	1 x 16	I	5 q21	gypsy retrotransposon integrase 1 [Source:HGNC Symbol;Acc:HGNC:25959]
471	ENSG00000197312	DDI2	-0.745844	-0.312325	-5.98421	6.83639e-05	0.00622745	0.00274054	3 x 10	I	1 p36	DNA damage inducible 1 homolog 2 [Source:HGNC Symbol;Acc:HGNC:24578]
472	ENSG00000163016	ALMS1P1	-0.654706	-0.280671	-5.81398	6.85809e-05	0.00622745	0.0027454	3 x 23		2 p13	ALMS1, centrosome and basal body associated protein pseudogene 1 [Source:HGNC Symbol;Acc:HGNC:29586]
473	ENSG00000148513	ANKRD30A	-3.63832	-0.375315	-5.89874	6.87563e-05	0.00622745	0.00274932	8 x 35		10 p11	ankyrin repeat domain 30A [Source:HGNC Symbol;Acc:HGNC:17234]
474	ENSG00000267009		-0.805837	-0.332172	-5.84465	6.90824e-05	0.00622745	0.00275659	8 x 35		17 q24
475	ENSG00000273576		-0.867536	-0.351765	-5.61174	6.92626e-05	0.00622745	0.00276059	11 x 29		17 q12
476	ENSG00000279693		-0.661339	-0.283036	-5.70855	6.93529e-05	0.00622745	0.00276259	6 x 20		16 q22
477	ENSG00000267288	LOC105371795	-0.750183	-0.313787	-5.79114	6.95197e-05	0.00622745	0.00276629	6 x 31		17 q21
478	ENSG00000259120	SMIM6	-0.468695	-0.210441	-5.32042	6.95666e-05	0.00622745	0.00276732	1 x 40		17 q25	small integral membrane protein 6 [Source:HGNC Symbol;Acc:HGNC:40032]
479	ENSG00000234979		-0.540913	-0.238604	-5.22725	6.95736e-05	0.00622745	0.00276748	21 x 35		22 q12
480	ENSG00000132003	ZSWIM4	0.700387	0.403809	5.8519	6.99009e-05	0.00622745	0.0027747	21 x 22		19 p13	zinc finger SWIM-type containing 4 [Source:HGNC Symbol;Acc:HGNC:25704]
481	ENSG00000229715		-0.652587	-0.279914	-5.74863	7.00687e-05	0.00725204	0.00277839	1 x 25		13 q13	eukaryotic translation elongation factor 1 delta pseudogene 3 [Source:HGNC Symbol;Acc:HGNC:30486]
482	ENSG00000133657	ATP13A3	0.500394	0.277584	5.71422	7.0531e-05	0.00725204	0.00278967	29 x 17		3 q29	ATPase 13A3 [Source:HGNC Symbol;Acc:HGNC:24113]
483	ENSG00000148484	RSU1	0.852781	0.505852	5.93707	7.08824e-05	0.00725204	0.0027982	37 x 16		10 p13	Ras suppressor protein 1 [Source:HGNC Symbol;Acc:HGNC:10464]
484	ENSG00000222014	RAB6C	-1.62281	-0.524278	-5.84512	7.23449e-05	0.00725204	0.00283338	8 x 36		2 q21	RAB6C, member RAS oncogene family [Source:HGNC Symbol;Acc:HGNC:16525]
485	ENSG00000176619	LMNB2	0.888112	0.530234	5.88787	7.2864e-05	0.00725204	0.00284573	38 x 25	C	19 p13	lamin B2 [Source:HGNC Symbol;Acc:HGNC:6638]
486	ENSG00000204241	LOC100128239	-0.742256	-0.311113	-5.61043	7.30677e-05	0.00725204	0.00285056	2 x 33		11 q25
487	ENSG00000047578	KIAA0556	-0.744104	-0.311738	-5.88163	7.32109e-05	0.00725204	0.00285395	2 x 23		16 p12	KIAA0556 [Source:HGNC Symbol;Acc:HGNC:29068]
488	ENSG00000144504	ANKMY1	-0.879273	-0.355398	-5.95681	7.34318e-05	0.00725204	0.00285917	3 x 28		2 q37	ankyrin repeat and MYND domain containing 1 [Source:HGNC Symbol;Acc:HGNC:20987]
489	ENSG00000260339	HEXA-AS1	-0.631787	-0.272426	-5.60626	7.36615e-05	0.00725204	0.00286458	11 x 36		15 q23	HEXA antisense RNA 1 [Source:HGNC Symbol;Acc:HGNC:25810]
490	ENSG00000139625	MAP3K12	-0.956685	-0.378607	-5.8807	7.39477e-05	0.00725204	0.0028713	3 x 26		12 q13	mitogen-activated protein kinase kinase kinase 12 [Source:HGNC Symbol;Acc:HGNC:6851]
491	ENSG00000101098	RIMS4	-2.63447	-0.560314	-5.75841	7.4464e-05	0.00725204	0.00288338	1 x 35		20 q13	regulating synaptic membrane exocytosis 4 [Source:HGNC Symbol;Acc:HGNC:16183]
492	ENSG00000124302	CHST8	-2.1104	-0.569527	-5.7338	7.51631e-05	0.00725204	0.00289962	1 x 35		19 q13	carbohydrate sulfotransferase 8 [Source:HGNC Symbol;Acc:HGNC:15993]
493	ENSG00000105219	CNTD2	-1.75974	-0.542225	-5.78701	7.54739e-05	0.00725204	0.00290681	13 x 40		19 q13	cyclin N-terminal domain containing 2 [Source:HGNC Symbol;Acc:HGNC:25805]
494	ENSG00000263325		-0.50898	-0.226291	-5.73288	7.56674e-05	0.00725204	0.00291127	13 x 36		16 p13
495	ENSG00000254872		-0.660798	-0.282844	-5.46668	7.65375e-05	0.00725204	0.00293121	17 x 19		11 p15
496	ENSG00000249825	CTD-2201I18.1	-0.768249	-0.319829	-5.59083	7.78489e-05	0.00725204	0.00296093	1 x 25		5 q14	uncharacterized LOC101929215 [Source:NCBI gene;Acc:101929215]
497	ENSG00000124702	KLHDC3	0.800434	0.470229	5.90554	7.81882e-05	0.00725204	0.00296855	34 x 29		6 p21	kelch domain containing 3 [Source:HGNC Symbol;Acc:HGNC:20704]
498	ENSG00000135750	KCNK1	0.891752	0.532761	5.02874	7.86539e-05	0.00725204	0.00297897	25 x 9		1 q42	potassium two pore domain channel subfamily K member 1 [Source:HGNC Symbol;Acc:HGNC:6272]
499	ENSG00000113163	COL4A3BP	-0.635362	-0.273719	-5.81187	7.90947e-05	0.00725204	0.00298879	1 x 15	I	5 q13	collagen type IV alpha 3 binding protein [Source:HGNC Symbol;Acc:HGNC:2205]
500	ENSG00000003989	SLC7A2	-2.87331	-0.536235	-5.80179	7.92767e-05	0.00725204	0.00299283	5 x 40	K	8 p22	solute carrier family 7 member 2 [Source:HGNC Symbol;Acc:HGNC:11060]
501	ENSG00000253816		-0.468092	-0.210201	-5.65932	7.93023e-05	0.00725204	0.00299339	11 x 18		5 q13
502	ENSG00000277825		-0.256567	-0.121135	-5.62616	7.94226e-05	0.00725204	0.00299606	15 x 31		19 p13
503	ENSG00000278987		-0.620881	-0.268462	-5.69388	7.98029e-05	0.00725204	0.00300446	6 x 22		16 p13
504	ENSG00000162482	AKR7A3	-2.71877	-0.553237	-5.8396	8.05734e-05	0.00725204	0.00302138	5 x 30		1 p36	aldo-keto reductase family 7 member A3 [Source:HGNC Symbol;Acc:HGNC:390]
505	ENSG00000151838	CCDC175	-0.438878	-0.198481	-5.12976	8.08336e-05	0.00725204	0.00302707	6 x 35		14 q23	coiled-coil domain containing 175 [Source:HGNC Symbol;Acc:HGNC:19847]
506	ENSG00000161031	PGLYRP2	-2.09764	-0.569004	-5.67487	8.10972e-05	0.00725204	0.00303281	17 x 36		19 p13	peptidoglycan recognition protein 2 [Source:HGNC Symbol;Acc:HGNC:30013]
507	ENSG00000237930		-0.368395	-0.169439	-5.22712	8.15e-05	0.00725204	0.00304156	22 x 40		2 q35
508	ENSG00000245571		-0.733561	-0.308165	-5.80216	8.22707e-05	0.00725204	0.00305819	10 x 35		11 q12
509	ENSG00000248905	FMN1	-1.07087	-0.410455	-5.72008	8.27218e-05	0.00725204	0.00306786	1 x 6	H	15 q13	formin 1 [Source:HGNC Symbol;Acc:HGNC:3768]
510	ENSG00000158186	MRAS	1.64975	1.12206	5.95438	8.30294e-05	0.00725204	0.00307444	28 x 1		3 q22	muscle RAS oncogene homolog [Source:HGNC Symbol;Acc:HGNC:7227]
511	ENSG00000165512	ZNF22	0.677404	0.38886	5.68151	8.31171e-05	0.00725204	0.00307631	33 x 20		10 q11	zinc finger protein 22 [Source:HGNC Symbol;Acc:HGNC:13012]
512	ENSG00000136100	VPS36	-0.385555	-0.176609	-5.50775	8.34163e-05	0.00725204	0.00308267	4 x 16		13 q14	vacuolar protein sorting 36 homolog [Source:HGNC Symbol;Acc:HGNC:20312]
513	ENSG00000156050	FAM161B	-1.06471	-0.408809	-5.81435	8.35705e-05	0.00725204	0.00308595	1 x 21		14 q24	family with sequence similarity 161 member B [Source:HGNC Symbol;Acc:HGNC:19854]
514	ENSG00000260078		-0.34536	-0.159712	-5.26354	8.373e-05	0.00725204	0.00308933	19 x 36		16 q12
515	ENSG00000139352	ASCL1	-1.19933	-0.442882	-5.08831	8.41021e-05	0.00725204	0.00309719	3 x 35		12 q23	achaete-scute family bHLH transcription factor 1 [Source:HGNC Symbol;Acc:HGNC:738]
516	ENSG00000278918		-0.99644	-0.390018	-5.74366	8.41777e-05	0.00725204	0.00309879	4 x 23		17 q21
517	ENSG00000260919		-0.344727	-0.159443	-5.64391	8.42064e-05	0.00725204	0.00309939	10 x 15		15 q24
518	ENSG00000254231	LOC105375624	-1.7218	-0.537662	-5.85036	8.44086e-05	0.00725204	0.00310365	10 x 38	K	8 q21
519	ENSG00000152137	HSPB8	-1.81267	-0.548066	-5.65178	8.48266e-05	0.00725204	0.00311242	1 x 2	H	12 q24	heat shock protein family B (small) member 8 [Source:HGNC Symbol;Acc:HGNC:30171]
520	ENSG00000130270	ATP8B3	-1.28952	-0.463497	-5.79038	8.48977e-05	0.00882306	0.00311391	23 x 10		19 p13	ATPase phospholipid transporting 8B3 [Source:HGNC Symbol;Acc:HGNC:13535]
521	ENSG00000064787	BCAS1	-3.09659	-0.502464	-5.84311	8.66113e-05	0.00882306	0.00315429	8 x 40	K	20 q13	breast carcinoma amplified sequence 1 [Source:HGNC Symbol;Acc:HGNC:974]
522	ENSG00000274928		-0.634897	-0.273551	-5.52086	8.66906e-05	0.00882306	0.00315615	7 x 14		12 q13	keratin 89 pseudogene [Source:HGNC Symbol;Acc:HGNC:30196]
523	ENSG00000103056	SMPD3	-1.59456	-0.520067	-5.79004	8.81101e-05	0.00882306	0.00318915	1 x 34		16 q22	sphingomyelin phosphodiesterase 3 [Source:HGNC Symbol;Acc:HGNC:14240]
524	ENSG00000259258		-0.252122	-0.119159	-5.50319	8.83264e-05	0.00882306	0.00319414	11 x 15		15 q22
525	ENSG00000278908		-0.651069	-0.27937	-5.68853	8.87949e-05	0.00882306	0.00320493	1 x 24		2 p23
526	ENSG00000185008	ROBO2	-1.89789	-0.556184	-5.5261	8.90451e-05	0.00882306	0.00321068	2 x 1		3 p12	roundabout guidance receptor 2 [Source:HGNC Symbol;Acc:HGNC:10250]
527	ENSG00000249947		-0.387773	-0.177531	-5.59282	8.91751e-05	0.00882306	0.00321366	7 x 20		5 q22	X-box binding protein 1 pseudogene 1 [Source:HGNC Symbol;Acc:HGNC:12802]
528	ENSG00000054598	FOXC1	2.86749	2.33128	5.89272	8.99602e-05	0.00882306	0.00323159	40 x 19	C	6 p25	forkhead box C1 [Source:HGNC Symbol;Acc:HGNC:3800]
529	ENSG00000235545		0.923728	0.555088	5.88871	9.00067e-05	0.00882306	0.00323264	22 x 24		1 p31
530	ENSG00000270170		0.989114	0.601436	5.8482	9.09949e-05	0.00882306	0.00325504	35 x 34		3 q29	NCBP2 antisense RNA 2 (head to head) [Source:HGNC Symbol;Acc:HGNC:25121]
531	ENSG00000260586		-0.46838	-0.210316	-5.56935	9.12913e-05	0.00882306	0.00326173	11 x 34		15 q23
532	ENSG00000223523		-0.40323	-0.183928	-4.91564	9.13e-05	0.00882306	0.00326192	19 x 34		2 q32
533	ENSG00000065882	TBC1D1	0.788137	0.461948	5.75406	9.1345e-05	0.00882306	0.00326293	36 x 19		4 p14	TBC1 domain family member 1 [Source:HGNC Symbol;Acc:HGNC:11578]
534	ENSG00000178935	ZNF552	-1.55826	-0.514399	-5.77237	9.13741e-05	0.00920286	0.00326359	10 x 37		19 q13	zinc finger protein 552 [Source:HGNC Symbol;Acc:HGNC:26135]
535	ENSG00000158006	PAFAH2	-0.809827	-0.333465	-5.80551	9.2415e-05	0.00920286	0.00328749	1 x 13	I	1 p36	platelet activating factor acetylhydrolase 2 [Source:HGNC Symbol;Acc:HGNC:8579]
536	ENSG00000176697	BDNF	-0.644131	-0.276881	-5.07969	9.24463e-05	0.00920286	0.0032882	14 x 34		11 p14	brain derived neurotrophic factor [Source:HGNC Symbol;Acc:HGNC:1033]
537	ENSG00000081791	KIAA0141	-0.55657	-0.24456	-5.74348	9.31219e-05	0.00920286	0.00330361	16 x 37		5 q31	KIAA0141 [Source:HGNC Symbol;Acc:HGNC:28969]
538	ENSG00000187720	THSD4	-2.4563	-0.570171	-5.80502	9.39904e-05	0.00920286	0.00332329	9 x 40	K	15 q23	thrombospondin type 1 domain containing 4 [Source:HGNC Symbol;Acc:HGNC:25835]
539	ENSG00000166477	LEO1	-0.80189	-0.330891	-5.73799	9.45928e-05	0.00920286	0.00333687	1 x 13	I	15 q21	LEO1 homolog, Paf1/RNA polymerase II complex component [Source:HGNC Symbol;Acc:HGNC:30401]
540	ENSG00000211454	AKR7L	-1.31276	-0.468521	-5.72145	9.49617e-05	0.00920286	0.00334515	5 x 28		1 p36	aldo-keto reductase family 7 like (gene/pseudogene) [Source:HGNC Symbol;Acc:HGNC:24056]
541	ENSG00000255727	LINC01489	-0.858736	-0.349021	-5.59939	9.51458e-05	0.00920286	0.00334927	7 x 35		12 p12	long intergenic non-protein coding RNA 1489 [Source:HGNC Symbol;Acc:HGNC:51145]
542	ENSG00000165186	PTCHD1	2.79332	2.24838	5.81859	9.52342e-05	0.00982036	0.00335125	33 x 24	B	X p22	patched domain containing 1 [Source:HGNC Symbol;Acc:HGNC:26392]
543	ENSG00000134755	DSC2	1.90495	1.34867	5.7752	9.61863e-05	0.00982036	0.00337325	31 x 21		18 q12	desmocollin 2 [Source:HGNC Symbol;Acc:HGNC:3036]
544	ENSG00000112242	E2F3	1.04943	0.645019	5.78426	9.79573e-05	0.00982036	0.00341377	31 x 21		6 p22	E2F transcription factor 3 [Source:HGNC Symbol;Acc:HGNC:3115]
545	ENSG00000243230		0.746188	0.433945	5.76897	9.85473e-05	0.00982036	0.00342715	25 x 23		7 q32
546	ENSG00000155760	FZD7	1.41816	0.92871	5.78076	9.87427e-05	0.00982036	0.00343157	11 x 4		2 q33	frizzled class receptor 7 [Source:HGNC Symbol;Acc:HGNC:4045]
547	ENSG00000266242		-0.888445	-0.358216	-5.30251	9.90316e-05	0.00982036	0.0034381	1 x 19		18 p11	GRAM domain containing 4 pseudogene 7 [Source:HGNC Symbol;Acc:HGNC:49142]
548	ENSG00000272476		0.860272	0.510999	5.73379	0.000101274	0.00982036	0.0034883	33 x 29		6 q21
549	ENSG00000255585	LOC651337	-0.41139	-0.187284	-5.48362	0.000101602	0.00982036	0.00349558	7 x 23		9 q34
550	ENSG00000137502	RAB30	-1.39213	-0.484793	-5.61642	0.000101758	0.00982036	0.00349902	2 x 1		11 q14	RAB30, member RAS oncogene family [Source:HGNC Symbol;Acc:HGNC:9770]
551	ENSG00000163975	MELTF	2.90741	2.3764	5.84441	0.000102659	0.00982036	0.0035189	40 x 18	C	3 q29	melanotransferrin [Source:HGNC Symbol;Acc:HGNC:7037]
552	ENSG00000167693	NXN	0.978277	0.593689	5.61776	0.000102815	0.00982036	0.00352234	20 x 8		17 p13	nucleoredoxin [Source:HGNC Symbol;Acc:HGNC:18008]
553	ENSG00000182253	SYNM	2.31877	1.74635	5.74097	0.000104172	0.00982036	0.00355202	40 x 20	C	15 q26	synemin [Source:HGNC Symbol;Acc:HGNC:24466]
554	ENSG00000272483		-0.273752	-0.128736	-5.46006	0.000104475	0.00982036	0.0035586	13 x 17		3 p25
555	ENSG00000088899	LZTS3	1.69987	1.16544	5.72226	0.000104887	0.00982036	0.00356754	21 x 24		20 p13	leucine zipper tumor suppressor family member 3 [Source:HGNC Symbol;Acc:HGNC:30139]
556	ENSG00000204385	SLC44A4	-3.44027	-0.429227	-5.75485	0.000105036	0.00982036	0.00357075	9 x 40	K	6 p21	solute carrier family 44 member 4 [Source:HGNC Symbol;Acc:HGNC:13941]
557	ENSG00000198816	ZNF358	0.712424	0.411685	5.61261	0.000105308	0.00982036	0.00357663	33 x 37		19 p13	zinc finger protein 358 [Source:HGNC Symbol;Acc:HGNC:16838]
558	ENSG00000269967		-0.519834	-0.230502	-5.55534	0.000105963	0.00982036	0.00359076	10 x 20		1 p35
559	ENSG00000108039	XPNPEP1	0.633342	0.360521	5.71961	0.000105979	0.00982036	0.00359109	25 x 20		10 q25	X-prolyl aminopeptidase 1 [Source:HGNC Symbol;Acc:HGNC:12822]
560	ENSG00000113812	ACTR8	-0.32061	-0.149132	-5.41061	0.000106666	0.00982036	0.00360582	5 x 13		3 p21	ARP8 actin related protein 8 homolog [Source:HGNC Symbol;Acc:HGNC:14672]
561	ENSG00000260239		-0.460541	-0.20719	-5.40794	0.000106765	0.00982036	0.00360795	21 x 34		6 p25	long intergenic non-protein coding RNA 2533 [Source:HGNC Symbol;Acc:HGNC:53566]
562	ENSG00000196405	EVL	-1.12772	-0.425249	-5.52058	0.000109203	0.00982036	0.00365963	2 x 1		14 q32	Enah/Vasp-like [Source:HGNC Symbol;Acc:HGNC:20234]
563	ENSG00000071677	PRLH	-0.437611	-0.197969	-5.40639	0.000109556	0.00982036	0.00366704	2 x 32		2 q37	prolactin releasing hormone [Source:HGNC Symbol;Acc:HGNC:17945]
564	ENSG00000169621	PROKR1	0.73787	0.428438	5.51047	0.000109685	0.00982036	0.00366975	34 x 20		2 p13	aprataxin and PNKP like factor [Source:HGNC Symbol;Acc:HGNC:28724]
565	ENSG00000215630		-0.437536	-0.197938	-5.35448	0.000110133	0.00982036	0.00367912	3 x 23		5 q13	glucuronidase, beta pseudogene 9 [Source:HGNC Symbol;Acc:HGNC:42323]
566	ENSG00000164125	FAM198B	-1.64312	-0.527199	-5.6642	0.000110298	0.00982036	0.00368256	2 x 1		4 q32	family with sequence similarity 198 member B [Source:HGNC Symbol;Acc:HGNC:25312]
567	ENSG00000083814	ZNF671	-1.12452	-0.424436	-5.61304	0.000111239	0.00982036	0.00370213	5 x 5	H	19 q13	zinc finger protein 671 [Source:HGNC Symbol;Acc:HGNC:26279]
568	ENSG00000275763		-0.848418	-0.345783	-5.51815	0.00011155	0.00982036	0.00370857	4 x 36		18 q23	chromosome 18 open reading frame 65 [Source:HGNC Symbol;Acc:HGNC:51248]
569	ENSG00000220205	VAMP2	-0.602506	-0.261725	-5.53591	0.000111598	0.00982036	0.00370957	7 x 32		17 p13	vesicle associated membrane protein 2 [Source:HGNC Symbol;Acc:HGNC:12643]
570	ENSG00000152804	HHEX	-0.828349	-0.339417	-5.45263	0.000111789	0.00982036	0.00371351	30 x 6		10 q23	hematopoietically expressed homeobox [Source:HGNC Symbol;Acc:HGNC:4901]
571	ENSG00000228918	LINC01344	-0.850636	-0.346481	-5.31282	0.000112229	0.00982036	0.0037226	10 x 35		1 q25	long intergenic non-protein coding RNA 1344 [Source:HGNC Symbol;Acc:HGNC:50554]
572	ENSG00000124243	BCAS4	-1.36987	-0.480368	-5.63182	0.000112588	0.00982036	0.00372998	3 x 35		20 q13	breast carcinoma amplified sequence 4 [Source:HGNC Symbol;Acc:HGNC:14367]
573	ENSG00000113597	TRAPPC13	-0.572437	-0.250541	-5.61568	0.000113681	0.00982036	0.00375235	1 x 16	I	5 q12	trafficking protein particle complex 13 [Source:HGNC Symbol;Acc:HGNC:25828]
574	ENSG00000186481		-1.22983	-0.450052	-5.46437	0.000115217	0.00982036	0.00378353	1 x 22		18 p11	ankyrin repeat domain 20 family member A5, pseudogene [Source:HGNC Symbol;Acc:HGNC:33833]
575	ENSG00000244219	TMEM225B	-0.873381	-0.353578	-5.48224	0.000116146	0.00982036	0.00380223	7 x 33		7 q22	transmembrane protein 225B [Source:HGNC Symbol;Acc:HGNC:53075]
576	ENSG00000120833	SOCS2	-0.879377	-0.35543	-5.21554	0.000116485	0.00982036	0.00380901	14 x 2		12 q22	suppressor of cytokine signaling 2 [Source:HGNC Symbol;Acc:HGNC:19382]
577	ENSG00000164180	TMEM161B	-0.574215	-0.251208	-5.50966	0.000116742	0.00982036	0.00381414	1 x 16	I	5 q14	transmembrane protein 161B [Source:HGNC Symbol;Acc:HGNC:28483]
578	ENSG00000223776	LGALS8-AS1	-0.648065	-0.278294	-5.40334	0.000116852	0.00982036	0.00381635	8 x 35		1 q43	LGALS8 antisense RNA 1 [Source:HGNC Symbol;Acc:HGNC:40340]
[truncated: 31,461 more rows]

## Sheet: BC_gBRCA1.vs.BC_sBRCA1
Sample Summary:
%DE:;;0.19
#genes with fdr < 0.2;;177
[truncated: 32,048 more rows]

## Sheet: BC_gBRCA1.vs.BC_sBRCA2
Sample Summary:
[truncated: 32,050 more rows]

[truncated: 6 more sheets: BC_gBRCA2.vs.BC_noBRCA, BC_gBRCA2.vs.BC_sBRCA2, BC_sBRCA1.vs.BC_gBRCA2, BC_sBRCA1.vs.BC_noBRCA, BC_sBRCA1.vs.BC_sBRCA2, BC_sBRCA2.vs.BC_noBRCA]
