# Supplementary material for: Transcriptome Patterns of BRCA1- and BRCA2- Mutated Breast and Ovarian Cancers
Source: Int J Mol Sci. 2021 Jan 28;22(3):1266. doi: 10.3390/ijms22031266 (PMC7865215; doi:10.3390/ijms22031266)
Supplement: Supplementary file 1 [file ijms-22-01266-s001.zip › SupplementatyData2.xlsx]

## Sheet: OV_gBRCA1.vs.OV_gBRCA2
Sample Summary:
%DE:;;0.02
#genes with fdr < 0.2;;0
#genes with fdr < 0.1;;0
#genes with fdr < 0.05;;0
#genes with fdr < 0.01;;0
<FC> = 0
<t-score> = 0.04
<p-value> = 0.36
<fdr> = 0.98
Gene Statistics
Rank	ID	Symbol	logFC	WAD	T.Score	p.value	fdr	Fdr	Metagene	Spot	Chromosome	Description
1	ENSG00000204934	ATP6V0E2-AS1	1.10678	0.89709	5.53392	3.82314e-06	0.289377	0.120135	18 x 25		7 q36	ATP6V0E2 antisense RNA 1 [Source:HGNC Symbol;Acc:HGNC:44180]
2	ENSG00000166965	RCCD1	1.01116	0.795083	5.11832	1.30322e-05	0.576361	0.204756	39 x 30	A	15 q26	RCC1 domain containing 1 [Source:HGNC Symbol;Acc:HGNC:30457]
3	ENSG00000126215	XRCC3	0.865635	0.648737	4.85949	3.31546e-05	0.576361	0.336389	19 x 18		14 q32	X-ray repair cross complementing 3 [Source:HGNC Symbol;Acc:HGNC:12830]
4	ENSG00000259976		-0.724094	-0.250963	-4.46689	8.8274e-05	0.576361	0.454567	11 x 6		3 q13
5	ENSG00000258986	TMEM179	1.58185	1.47258	4.57671	9.90018e-05	0.576361	0.465219	30 x 27		14 q32	transmembrane protein 179 [Source:HGNC Symbol;Acc:HGNC:20137]
6	ENSG00000165501	LRR1	0.893758	0.676183	4.44622	0.000100781	0.576361	0.466809	39 x 29	A	14 q21	leucine rich repeat protein 1 [Source:HGNC Symbol;Acc:HGNC:19742]
7	ENSG00000269896	LOC100129534	1.12347	0.91537	4.44687	0.000106459	0.576361	0.471589	4 x 27		1 p36
8	ENSG00000257179		0.635418	0.439135	4.31453	0.000136668	0.576361	0.491332	23 x 36		14 q12	high mobility group nucleosomal binding domain 2 pseudogene 6 [Source:HGNC Symbol;Acc:HGNC:33574]
9	ENSG00000164902	PHAX	-0.554302	-0.215965	-4.32787	0.000141426	0.620446	0.493782	1 x 14	I	5 q23	phosphorylated adaptor for RNA export [Source:HGNC Symbol;Acc:HGNC:10241]
10	ENSG00000106346	USP42	-0.67714	-0.242747	-4.17762	0.00020868	0.620446	0.528558	26 x 20		7 p22	ubiquitin specific peptidase 42 [Source:HGNC Symbol;Acc:HGNC:20068]
11	ENSG00000131711	MAP1B	-1.41819	-0.242088	-4.21035	0.000212074	0.620446	0.529814	9 x 3		5 q13	microtubule associated protein 1B [Source:HGNC Symbol;Acc:HGNC:6836]
12	ENSG00000165688	PMPCA	0.596678	0.406505	4.21278	0.00021704	0.620446	0.531591	23 x 15		9 q34	peptidase, mitochondrial processing alpha subunit [Source:HGNC Symbol;Acc:HGNC:18667]
13	ENSG00000275409		-0.905136	-0.272186	-4.10722	0.000319671	0.620446	0.55721	12 x 31		12 q24
14	ENSG00000162733	DDR2	-1.32127	-0.257995	-4.00063	0.000341989	0.620446	0.560941	19 x 2	G	1 q23	discoidin domain receptor tyrosine kinase 2 [Source:HGNC Symbol;Acc:HGNC:2731]
15	ENSG00000184986	TMEM121	1.30535	1.12373	4.00704	0.000352652	0.620446	0.562573	2 x 34		14 q32	transmembrane protein 121 [Source:HGNC Symbol;Acc:HGNC:20511]
16	ENSG00000079616	KIF22	0.665404	0.464915	3.96316	0.000373981	0.620446	0.565581	40 x 30	A	16 p11	kinesin family member 22 [Source:HGNC Symbol;Acc:HGNC:6391]
17	ENSG00000106443	PHF14	-0.704033	-0.24759	-3.9697	0.000375786	0.620446	0.565822	28 x 20		7 p21	PHD finger protein 14 [Source:HGNC Symbol;Acc:HGNC:22203]
18	ENSG00000149929	HIRIP3	0.600341	0.409558	3.97177	0.000388032	0.620446	0.567398	17 x 40		16 p11	HIRA interacting protein 3 [Source:HGNC Symbol;Acc:HGNC:4917]
19	ENSG00000262959		0.365035	0.227264	3.95021	0.000403384	0.620446	0.569251	22 x 35		16 p13	ribosomal protein L23a pseudogene 86 [Source:HGNC Symbol;Acc:HGNC:51577]
20	ENSG00000258599		0.362585	0.225513	3.92803	0.000427321	0.620446	0.571894	33 x 30		14 q11
21	ENSG00000273428		0.499947	0.328349	3.9493	0.000429767	0.620446	0.572149	16 x 24		22 q12
22	ENSG00000158985	CDC42SE2	-0.682969	-0.243828	-3.90559	0.000448366	0.620446	0.574002	30 x 10		5 q31	CDC42 small effector 2 [Source:HGNC Symbol;Acc:HGNC:18547]
23	ENSG00000140199	SLC12A6	-0.521076	-0.207407	-4.00431	0.000449487	0.620446	0.574109	6 x 7	H	15 q14	solute carrier family 12 member 6 [Source:HGNC Symbol;Acc:HGNC:10914]
24	ENSG00000179958	DCTPP1	0.961687	0.744129	3.9212	0.000468821	0.620446	0.575883	40 x 33	A	16 p11	dCTP pyrophosphatase 1 [Source:HGNC Symbol;Acc:HGNC:28777]
25	ENSG00000267313	KC6	-2.05807	-0.0176046	-4.20242	0.000477432	0.620446	0.57663	26 x 30		18 q12	keratoconus gene 6 [Source:NCBI gene;Acc:641516]
26	ENSG00000176912		1.0463	0.832036	3.86247	0.000500233	0.620446	0.578492	40 x 29	A	18 p11	TYMS opposite strand [Source:HGNC Symbol;Acc:HGNC:29553]
27	ENSG00000169684	CHRNA5	1.0952	0.884497	3.94027	0.00051387	0.620446	0.579532	40 x 24	C	15 q25	cholinergic receptor nicotinic alpha 5 subunit [Source:HGNC Symbol;Acc:HGNC:1959]
28	ENSG00000227237		0.453467	0.292482	3.84995	0.000522133	0.620446	0.580137	16 x 17		1 q44
29	ENSG00000171988	JMJD1C	-0.599152	-0.22663	-3.8285	0.000569019	0.620446	0.58326	8 x 6		10 q21	jumonji domain containing 1C [Source:HGNC Symbol;Acc:HGNC:12313]
30	ENSG00000106392	C1GALT1	-0.873369	-0.269664	-3.87568	0.000583566	0.620446	0.584132	35 x 18		7 p22	core 1 synthase, glycoprotein-N-acetylgalactosamine 3-beta-galactosyltransferase 1 [Source:HGNC Symbol;Acc:HGNC:24337]
31	ENSG00000227329		0.354822	0.219987	3.77232	0.000655645	0.620446	0.587915	8 x 16		X p11
32	ENSG00000130021	PUDP	0.824389	0.609209	3.7741	0.000663446	0.620446	0.588278	31 x 13		X p22	pseudouridine 5'-phosphatase [Source:HGNC Symbol;Acc:HGNC:16818]
33	ENSG00000100075	SLC25A1	0.777449	0.565274	3.7487	0.00068791	0.620446	0.589365	40 x 36		22 q11	solute carrier family 25 member 1 [Source:HGNC Symbol;Acc:HGNC:10979]
34	ENSG00000188070	C11orf95	-0.772731	-0.258297	-3.74183	0.0007427	0.620446	0.591551	11 x 8		11 q13	chromosome 11 open reading frame 95 [Source:HGNC Symbol;Acc:HGNC:28449]
35	ENSG00000152117	LOC150776	0.596674	0.406501	3.75772	0.00075104	0.620446	0.591857	8 x 26	J	2 q21
36	ENSG00000151292	CSNK1G3	-0.590719	-0.224702	-3.71827	0.00075693	0.620446	0.592069	1 x 16	I	5 q23	casein kinase 1 gamma 3 [Source:HGNC Symbol;Acc:HGNC:2456]
37	ENSG00000219545	UMAD1	-0.673154	-0.241998	-3.73183	0.000761366	0.620446	0.592227	1 x 15	I	7 p21	UBAP1-MVB12-associated (UMA) domain containing 1 [Source:HGNC Symbol;Acc:HGNC:48955]
38	ENSG00000133247	KMT5C	0.680361	0.477944	3.74628	0.000777155	0.620446	0.592775	19 x 17		19 q13	lysine methyltransferase 5C [Source:HGNC Symbol;Acc:HGNC:28405]
39	ENSG00000228223	HCG11	-1.11197	-0.276102	-3.70252	0.000787819	0.620446	0.593133	9 x 7		6 p22	HLA complex group 11 (non-protein coding) [Source:HGNC Symbol;Acc:HGNC:17707]
40	ENSG00000232139	LINC00867	0.596235	0.406136	3.69172	0.00080529	0.620446	0.5937	19 x 30		10 q26	long intergenic non-protein coding RNA 867 [Source:HGNC Symbol;Acc:HGNC:45265]
41	ENSG00000275450	PTGER4P2-CDK2AP2P2	0.453856	0.292777	3.7343	0.000819383	0.620446	0.59414	4 x 32		9 p11	PTGER4P2-CDK2AP2P2 readthrough, transcribed pseudogene [Source:NCBI gene;Acc:442421]
42	ENSG00000226548		-0.332064	-0.148078	-3.68093	0.00082404	0.620446	0.594283	14 x 12		2 p21
43	ENSG00000131876	SNRPA1	0.801303	0.587462	3.75839	0.000831233	0.620446	0.5945	40 x 31	A	15 q26	small nuclear ribonucleoprotein polypeptide A' [Source:HGNC Symbol;Acc:HGNC:11152]
44	ENSG00000273419		0.669599	0.468557	3.6964	0.000832499	0.678352	0.594537	16 x 20		7 q36
45	ENSG00000119403	PHF19	0.606384	0.414608	3.70878	0.000909678	0.678352	0.600836	38 x 24	C	9 q33	PHD finger protein 19 [Source:HGNC Symbol;Acc:HGNC:24566]
46	ENSG00000092208	GEMIN2	0.686343	0.483186	3.64598	0.000910851	0.678352	0.600924	36 x 30		14 q21	gem nuclear organelle associated protein 2 [Source:HGNC Symbol;Acc:HGNC:10884]
47	ENSG00000139618	BRCA2	1.11808	0.909453	3.68702	0.000938706	0.678352	0.602967	40 x 25	A	13 q13	BRCA2, DNA repair associated [Source:HGNC Symbol;Acc:HGNC:1101]
48	ENSG00000157999	ANKRD61	-0.459208	-0.18998	-3.65285	0.00094062	0.678352	0.603103	6 x 21		7 p22	ankyrin repeat domain 61 [Source:HGNC Symbol;Acc:HGNC:22467]
49	ENSG00000198830	HMGN2	0.681943	0.479329	3.6296	0.00095378	0.678352	0.604027	37 x 31		1 p36	high mobility group nucleosomal binding domain 2 [Source:HGNC Symbol;Acc:HGNC:4986]
50	ENSG00000106615	RHEB	0.628103	0.432916	3.63602	0.00101107	0.678352	0.607801	37 x 32		7 q36	Ras homolog enriched in brain [Source:HGNC Symbol;Acc:HGNC:10011]
51	ENSG00000169957	ZNF768	0.548668	0.367121	3.75412	0.00101448	0.678352	0.608014	20 x 17		16 p11	zinc finger protein 768 [Source:HGNC Symbol;Acc:HGNC:26273]
52	ENSG00000159147	DONSON	0.641981	0.444739	3.58105	0.00109276	0.678352	0.612563	38 x 25	C	21 q22	downstream neighbor of SON [Source:HGNC Symbol;Acc:HGNC:2993]
53	ENSG00000188807	TMEM201	0.719992	0.513015	3.57531	0.00110386	0.678352	0.613161	21 x 19		1 p36	transmembrane protein 201 [Source:HGNC Symbol;Acc:HGNC:33719]
54	ENSG00000106012	IQCE	-0.819349	-0.264201	-3.60528	0.00111376	0.678352	0.613686	2 x 24		7 p22	IQ motif containing E [Source:HGNC Symbol;Acc:HGNC:29171]
55	ENSG00000240449		0.638872	0.442081	3.58166	0.00116351	0.678352	0.616198	25 x 17		7 q36
56	ENSG00000100601	ALKBH1	0.584953	0.396779	3.57181	0.00117314	0.678352	0.616661	20 x 37		14 q24	alkB homolog 1, histone H2A dioxygenase [Source:HGNC Symbol;Acc:HGNC:17911]
57	ENSG00000106546	AHR	-0.917411	-0.273024	-3.54779	0.00119081	0.678352	0.617494	28 x 6		7 p21	aryl hydrocarbon receptor [Source:HGNC Symbol;Acc:HGNC:348]
58	ENSG00000218890		0.319366	0.195135	3.65448	0.00119277	0.678352	0.617585	23 x 36		6 q12
59	ENSG00000198670	LPA	1.00428	0.787927	3.57827	0.00119432	0.678352	0.617657	23 x 30		6 q26	lipoprotein(a) [Source:HGNC Symbol;Acc:HGNC:6667]
60	ENSG00000260167		0.456325	0.294655	3.5915	0.00122464	0.678352	0.619029	18 x 31		16 p11
61	ENSG00000249014		0.494759	0.324291	3.54883	0.00122471	0.678352	0.619032	24 x 36		5 q13	high mobility group nucleosomal binding domain 2 pseudogene 4 [Source:HGNC Symbol;Acc:HGNC:33567]
62	ENSG00000180776	ZDHHC20	0.523922	0.347278	3.53961	0.00123792	0.678352	0.61961	31 x 16		13 q12	zinc finger DHHC-type containing 20 [Source:HGNC Symbol;Acc:HGNC:20749]
63	ENSG00000272021		-0.371671	-0.16201	-3.5653	0.00124363	0.678352	0.619857	36 x 18		5 q15
64	ENSG00000215788	TNFRSF25	0.879388	0.662108	3.53432	0.00130801	0.678352	0.622499	8 x 26	J	1 p36	TNF receptor superfamily member 25 [Source:HGNC Symbol;Acc:HGNC:11910]
65	ENSG00000272799		0.393503	0.247826	3.57362	0.00133129	0.678352	0.623396	17 x 32		18 p11
66	ENSG00000241547		0.406473	0.257331	3.51678	0.00139017	0.678352	0.625543	24 x 36		1 p36	actin gamma 1 pseudogene 20 [Source:HGNC Symbol;Acc:HGNC:51500]
67	ENSG00000268104	SLC6A14	1.3175	1.13824	3.54942	0.00139453	0.678352	0.625695	40 x 19	C	X q23	solute carrier family 6 member 14 [Source:HGNC Symbol;Acc:HGNC:11047]
68	ENSG00000093009	CDC45	0.942054	0.724251	3.50503	0.00139474	0.678352	0.625702	40 x 26	A	22 q11	cell division cycle 45 [Source:HGNC Symbol;Acc:HGNC:1739]
69	ENSG00000262519		0.544374	0.363656	3.5098	0.00142998	0.678352	0.626901	27 x 36		17 p13	thioredoxin pseudogene 4 [Source:HGNC Symbol;Acc:HGNC:49484]
70	ENSG00000198865	CCDC152	-0.785149	-0.259977	-3.48009	0.00146304	0.678352	0.627977	23 x 29		5 p12	coiled-coil domain containing 152 [Source:HGNC Symbol;Acc:HGNC:34438]
71	ENSG00000230157		0.432365	0.276559	3.47449	0.00146555	0.678352	0.628057	21 x 33		14 q32	ATP synthase, H+ transporting, mitochondrial Fo complex subunit C1 (subunit 9) pseudogene 1 [Source:HGNC Symbol;Acc:HGNC:19815]
72	ENSG00000101445	PPP1R16B	-1.39514	-0.246303	-3.47178	0.00147477	0.678352	0.628348	33 x 5		20 q11	protein phosphatase 1 regulatory subunit 16B [Source:HGNC Symbol;Acc:HGNC:15850]
73	ENSG00000042088	TDP1	0.669726	0.468668	3.47006	0.0014793	0.678352	0.62849	28 x 18		14 q32	tyrosyl-DNA phosphodiesterase 1 [Source:HGNC Symbol;Acc:HGNC:18884]
74	ENSG00000260032	NORAD	-0.517784	-0.206528	-3.47984	0.00148013	0.824321	0.628516	3 x 17		20 q11	non-coding RNA activated by DNA damage [Source:HGNC Symbol;Acc:HGNC:44311]
75	ENSG00000169221	TBC1D10B	0.391256	0.246188	3.46573	0.00150799	0.824321	0.631287	20 x 16		16 p11	TBC1 domain family member 10B [Source:HGNC Symbol;Acc:HGNC:24510]
76	ENSG00000148399	DPH7	0.443116	0.284643	3.46501	0.00158057	0.824321	0.638149	18 x 19		9 q34	diphthamide biosynthesis 7 [Source:HGNC Symbol;Acc:HGNC:25199]
77	ENSG00000196547	MAN2A2	0.819749	0.604816	3.44722	0.0016022	0.824321	0.6401	6 x 21		15 q26	mannosidase alpha class 2A member 2 [Source:HGNC Symbol;Acc:HGNC:6825]
78	ENSG00000181722	ZBTB20	-0.657081	-0.238896	-3.42047	0.00168298	0.824321	0.647041	11 x 7		3 q13	zinc finger and BTB domain containing 20 [Source:HGNC Symbol;Acc:HGNC:13503]
79	ENSG00000130713	EXOSC2	0.556591	0.373541	3.42433	0.00173127	0.824321	0.650946	37 x 30		9 q34	exosome component 2 [Source:HGNC Symbol;Acc:HGNC:17097]
80	ENSG00000228078		-0.649834	-0.237454	-3.4321	0.00173398	0.824321	0.65116	33 x 10		6 p22	major histocompatibility complex, class I, U (pseudogene) [Source:HGNC Symbol;Acc:HGNC:23477]
81	ENSG00000156873	PHKG2	0.523708	0.347108	3.41673	0.00174178	0.824321	0.651773	17 x 40		16 p11	phosphorylase kinase catalytic subunit gamma 2 [Source:HGNC Symbol;Acc:HGNC:8931]
82	ENSG00000247572	CKMT2-AS1	-0.567833	-0.21929	-3.43817	0.00176856	0.824321	0.653846	7 x 32		5 q14	CKMT2 antisense RNA 1 [Source:HGNC Symbol;Acc:HGNC:48997]
83	ENSG00000276538		0.499948	0.32835	3.41959	0.00178183	0.824321	0.654854	11 x 11		7 q36
84	ENSG00000172264	MACROD2	-1.46166	-0.233407	-3.46606	0.00183373	0.824321	0.658687	1 x 20		20 p12	MACRO domain containing 2 [Source:HGNC Symbol;Acc:HGNC:16126]
85	ENSG00000091129	NRCAM	-0.955572	-0.27514	-3.44937	0.00187325	0.824321	0.661491	4 x 2		7 q31	neuronal cell adhesion molecule [Source:HGNC Symbol;Acc:HGNC:7994]
86	ENSG00000249650		0.472388	0.30695	3.37321	0.00191284	0.824321	0.664207	17 x 26		5 p15
87	ENSG00000273117		0.868386	0.651404	3.36883	0.00193398	0.824321	0.66562	31 x 32		7 q36
88	ENSG00000187953		-0.570438	-0.219919	-3.37959	0.00195693	0.824321	0.667126	7 x 18		7 p22	PMS2 C-terminal like pseudogene [Source:HGNC Symbol;Acc:HGNC:30061]
89	ENSG00000170779	CDCA4	0.715322	0.508841	3.41282	0.00205785	0.824321	0.673424	39 x 29	A	14 q32	cell division cycle associated 4 [Source:HGNC Symbol;Acc:HGNC:14625]
90	ENSG00000113163	COL4A3BP	-0.614282	-0.229997	-3.38202	0.00207871	0.824321	0.674663	1 x 15	I	5 q13	collagen type IV alpha 3 binding protein [Source:HGNC Symbol;Acc:HGNC:2205]
91	ENSG00000144158		0.6142	0.421169	3.43079	0.00210019	0.824321	0.675918	25 x 37		2 q14
92	ENSG00000141543	EIF4A3	0.584353	0.396283	3.34204	0.00211028	0.824321	0.6765	40 x 32	A	17 q25	eukaryotic translation initiation factor 4A3 [Source:HGNC Symbol;Acc:HGNC:18683]
93	ENSG00000149926	FAM57B	0.939018	0.721194	3.37501	0.00212016	0.824321	0.677066	8 x 34		16 p11	family with sequence similarity 57 member B [Source:HGNC Symbol;Acc:HGNC:25295]
94	ENSG00000181904	C5orf24	-0.52647	-0.208834	-3.33165	0.0021396	0.824321	0.678167	1 x 15	I	5 q31	chromosome 5 open reading frame 24 [Source:HGNC Symbol;Acc:HGNC:26746]
95	ENSG00000178966	RMI1	0.809709	0.595349	3.32433	0.00218722	0.824321	0.680795	29 x 15		9 q21	RecQ mediated genome instability 1 [Source:HGNC Symbol;Acc:HGNC:25764]
96	ENSG00000110367	DDX6	-0.404978	-0.17311	-3.3658	0.00218744	0.824321	0.680807	5 x 13		11 q23	DEAD-box helicase 6 [Source:HGNC Symbol;Acc:HGNC:2747]
97	ENSG00000135045	C9orf40	0.710254	0.504323	3.34315	0.00221012	0.824321	0.682026	40 x 22	C	9 q21	chromosome 9 open reading frame 40 [Source:HGNC Symbol;Acc:HGNC:23433]
98	ENSG00000111145	ELK3	-0.712727	-0.249077	-3.32621	0.00224634	0.824321	0.683929	28 x 4		12 q23	ELK3, ETS transcription factor [Source:HGNC Symbol;Acc:HGNC:3325]
99	ENSG00000259083		0.568197	0.383	3.31239	0.00225095	0.824321	0.684168	16 x 15		14 q21
100	ENSG00000099901	RANBP1	0.719232	0.512335	3.33211	0.00226438	0.824321	0.684858	38 x 30		22 q11	RAN binding protein 1 [Source:HGNC Symbol;Acc:HGNC:9847]
101	ENSG00000148143	ZNF462	-0.614944	-0.230142	-3.30893	0.00228955	0.824321	0.686135	10 x 5		9 q31	zinc finger protein 462 [Source:HGNC Symbol;Acc:HGNC:21684]
102	ENSG00000160318	CLDND2	0.778961	0.566672	3.29716	0.00235739	0.824321	0.68946	31 x 36		19 q13	claudin domain containing 2 [Source:HGNC Symbol;Acc:HGNC:28511]
103	ENSG00000253865		0.490027	0.320602	3.2932	0.00241203	0.824321	0.692025	17 x 32		5 q32
104	ENSG00000161132		0.612387	0.419645	3.33898	0.00241783	0.824321	0.692292	18 x 20		22 q11
105	ENSG00000272425		0.597427	0.407129	3.29252	0.00243749	0.824321	0.693187	21 x 25		8 q21
106	ENSG00000214960	ISPD	-0.850906	-0.267572	-3.31328	0.00244173	0.824321	0.693379	3 x 16		7 p21	isoprenoid synthase domain containing [Source:HGNC Symbol;Acc:HGNC:37276]
107	ENSG00000131437	KIF3A	-0.594498	-0.22557	-3.28175	0.00244213	0.824321	0.693397	1 x 18		5 q31	kinesin family member 3A [Source:HGNC Symbol;Acc:HGNC:6319]
108	ENSG00000008256	CYTH3	-0.853192	-0.267796	-3.35791	0.00248128	0.824321	0.695139	19 x 5		7 p22	cytohesin 3 [Source:HGNC Symbol;Acc:HGNC:9504]
109	ENSG00000184508	HDDC3	0.876305	0.659103	3.29243	0.00248229	0.824321	0.695183	40 x 38		15 q26	HD domain containing 3 [Source:HGNC Symbol;Acc:HGNC:30522]
110	ENSG00000215838	LOC440700	0.412387	0.261692	3.3335	0.00249622	0.824321	0.695792	19 x 25		1 q24
111	ENSG00000261762		0.772744	0.560932	3.35276	0.00250225	0.824321	0.696053	40 x 23	C	15 q25
112	ENSG00000179094	PER1	-0.757843	-0.256179	-3.32719	0.00252924	0.824321	0.697211	13 x 6		17 p13	period circadian clock 1 [Source:HGNC Symbol;Acc:HGNC:8845]
113	ENSG00000136238	RAC1	-0.595717	-0.225849	-3.28589	0.00255516	0.824321	0.698303	33 x 14		7 p22	ras-related C3 botulinum toxin substrate 1 (rho family, small GTP binding protein Rac1) [Source:HGNC Symbol;Acc:HGNC:9801]
114	ENSG00000197558	SSPO	1.31547	1.13581	3.29143	0.00257745	0.824321	0.699227	6 x 26		7 q36	SCO-spondin [Source:HGNC Symbol;Acc:HGNC:21998]
115	ENSG00000205903	ZNF316	-0.6236	-0.232014	-3.26202	0.00258375	0.824321	0.699486	20 x 19		7 p22	zinc finger protein 316 [Source:HGNC Symbol;Acc:HGNC:13843]
116	ENSG00000228509		0.42912	0.274131	3.25357	0.00263358	0.824321	0.701496	13 x 15		2 q32
117	ENSG00000182463	TSHZ2	-0.625334	-0.232384	-3.25098	0.00265044	0.824321	0.702162	11 x 4		20 q13	teashirt zinc finger homeobox 2 [Source:HGNC Symbol;Acc:HGNC:13010]
118	ENSG00000165244	ZNF367	0.73769	0.528933	3.27169	0.00266827	0.824321	0.702858	40 x 26	A	9 q22	zinc finger protein 367 [Source:HGNC Symbol;Acc:HGNC:18320]
119	ENSG00000233175		0.839235	0.623338	3.2624	0.00273263	0.824321	0.705306	9 x 27		17 q21
120	ENSG00000188229	TUBB4B	0.74104	0.531964	3.27464	0.00273702	0.824321	0.705469	40 x 35		9 q34	tubulin beta 4B class IVb [Source:HGNC Symbol;Acc:HGNC:20771]
121	ENSG00000234664		0.617563	0.424001	3.23474	0.00276933	0.824321	0.706658	23 x 38		15 q13	high mobility group nucleosomal binding domain 2 pseudogene 5 [Source:HGNC Symbol;Acc:HGNC:33568]
122	ENSG00000141391	PRELID3A	0.809429	0.595086	3.2326	0.00279231	0.824321	0.707489	32 x 30		18 p11	PRELI domain containing 3A [Source:HGNC Symbol;Acc:HGNC:24639]
123	ENSG00000272462		-0.714726	-0.249413	-3.23103	0.00287568	0.824321	0.710408	21 x 28		6 p22
124	ENSG00000238840		0.372675	0.232742	3.21176	0.00297484	0.824321	0.713695	25 x 22		10 p15	U8 small nucleolar RNA [Source:RFAM;Acc:RF00096]
125	ENSG00000068137	PLEKHH3	0.591912	0.402543	3.20469	0.00299946	0.824321	0.714482	20 x 16		17 q21	pleckstrin homology, MyTH4 and FERM domain containing H3 [Source:HGNC Symbol;Acc:HGNC:26105]
126	ENSG00000146574	CCZ1B	-0.690977	-0.245284	-3.23974	0.00300015	0.824321	0.714504	31 x 18		7 p22	CCZ1 homolog B, vacuolar protein trafficking and biogenesis associated [Source:HGNC Symbol;Acc:HGNC:21717]
127	ENSG00000187713	TMEM203	0.425761	0.271622	3.21833	0.0030219	0.824321	0.71519	20 x 39		9 q34	transmembrane protein 203 [Source:HGNC Symbol;Acc:HGNC:28217]
128	ENSG00000267577		0.547981	0.366567	3.19893	0.0030463	0.824321	0.715949	17 x 33		19 q13
129	ENSG00000177239	MAN1B1	0.535995	0.356921	3.21425	0.00305185	0.824321	0.71612	22 x 13		9 q34	mannosidase alpha class 1B member 1 [Source:HGNC Symbol;Acc:HGNC:6823]
130	ENSG00000140525	FANCI	0.854993	0.638456	3.20766	0.0030624	0.824321	0.716444	40 x 26	A	15 q26	Fanconi anemia complementation group I [Source:HGNC Symbol;Acc:HGNC:25568]
131	ENSG00000264107		0.83185	0.616296	3.23172	0.00307468	0.824321	0.716819	31 x 35		17 q11
132	ENSG00000100422	CERK	-0.801172	-0.26203	-3.24324	0.00307521	0.824321	0.716835	9 x 9		22 q13	ceramide kinase [Source:HGNC Symbol;Acc:HGNC:19256]
133	ENSG00000233369	GTF2IP4	-0.609397	-0.228923	-3.19234	0.003097	0.824321	0.717493	2 x 20		7 q11	general transcription factor IIi pseudogene 4 [Source:HGNC Symbol;Acc:HGNC:51716]
134	ENSG00000272455		0.811867	0.59738	3.18755	0.00316363	0.824321	0.719457	15 x 25		1 p36
135	ENSG00000241549	GUSBP2	-0.645822	-0.236645	-3.1826	0.00322656	0.824321	0.721247	3 x 23		6 p22	glucuronidase, beta pseudogene 2 [Source:HGNC Symbol;Acc:HGNC:18792]
136	ENSG00000125414	MYH2	-0.399895	-0.171452	-3.18981	0.0032355	0.824321	0.721496	19 x 8		17 p13	myosin heavy chain 2 [Source:HGNC Symbol;Acc:HGNC:7572]
137	ENSG00000267327		-1.28142	-0.263154	-3.1827	0.00330968	0.824321	0.723519	26 x 30		18 q21
138	ENSG00000076003	MCM6	0.804464	0.590424	3.20562	0.00331274	0.824321	0.7236	39 x 26	A	2 q21	minichromosome maintenance complex component 6 [Source:HGNC Symbol;Acc:HGNC:6949]
139	ENSG00000187372	PCDHB13	-1.47643	-0.230241	-3.2097	0.00331413	0.824321	0.723637	6 x 4		5 q31	protocadherin beta 13 [Source:HGNC Symbol;Acc:HGNC:8684]
140	ENSG00000185347	C14orf80	0.685877	0.482778	3.16964	0.00331473	0.824321	0.723653	20 x 16		14 q32	chromosome 14 open reading frame 80 [Source:HGNC Symbol;Acc:HGNC:20127]
141	ENSG00000234840	LINC01239	-1.29361	-0.26166	-3.21806	0.00340336	0.824321	0.725962	26 x 31		9 p21	long intergenic non-protein coding RNA 1239 [Source:HGNC Symbol;Acc:HGNC:49796]
142	ENSG00000251602	LOC100507437	0.7097	0.50383	3.15204	0.00345564	0.824321	0.727275	6 x 34		14 q32
143	ENSG00000271525		0.460715	0.298003	3.14594	0.00349656	0.824321	0.728278	24 x 37		9 q34	ADP ribosylation factor 4 pseudogene 1 [Source:HGNC Symbol;Acc:HGNC:657]
144	ENSG00000198765	SYCP1	0.472131	0.306753	3.14948	0.0034977	0.824321	0.728306	24 x 30		1 p13	synaptonemal complex protein 1 [Source:HGNC Symbol;Acc:HGNC:11487]
145	ENSG00000223776	LGALS8-AS1	0.590122	0.401058	3.16307	0.00351472	0.824321	0.728717	8 x 35		1 q43	LGALS8 antisense RNA 1 [Source:HGNC Symbol;Acc:HGNC:40340]
146	ENSG00000148384	INPP5E	0.569998	0.384474	3.16293	0.00352936	0.824321	0.729068	19 x 18		9 q34	inositol polyphosphate-5-phosphatase E [Source:HGNC Symbol;Acc:HGNC:21474]
147	ENSG00000106571	GLI3	-0.991897	-0.276469	-3.14749	0.00357591	0.824321	0.730166	3 x 1		7 p14	GLI family zinc finger 3 [Source:HGNC Symbol;Acc:HGNC:4319]
148	ENSG00000274099		0.256478	0.152623	3.19502	0.00357604	0.824321	0.730169	22 x 34		15 q11	ATP binding cassette subfamily B member 10 pseudogene 1 [Source:HGNC Symbol;Acc:HGNC:14114]
149	ENSG00000258331	LINC02461	-0.524039	-0.208193	-3.20423	0.00358635	0.824321	0.730409	16 x 9		12 q12	long intergenic non-protein coding RNA 2461 [Source:HGNC Symbol;Acc:HGNC:53398]
150	ENSG00000220614		-0.339689	-0.150822	-3.13084	0.00364656	0.824321	0.731786	11 x 16		6 p21
151	ENSG00000273011		0.377233	0.236024	3.13596	0.00365974	0.824321	0.732082	15 x 19		7 q36
152	ENSG00000167281	RBFOX3	0.932999	0.715148	3.14432	0.00368572	0.824321	0.73266	29 x 27		17 q25	RNA binding protein, fox-1 homolog 3 [Source:HGNC Symbol;Acc:HGNC:27097]
153	ENSG00000164900	GBX1	0.893183	0.675618	3.25101	0.00369698	0.824321	0.732908	21 x 31		7 q36	gastrulation brain homeobox 1 [Source:HGNC Symbol;Acc:HGNC:4185]
154	ENSG00000184056	VPS33B	0.477092	0.310575	3.15179	0.00375297	0.824321	0.734122	22 x 35		15 q26	VPS33B, late endosome and lysosome associated [Source:HGNC Symbol;Acc:HGNC:12712]
155	ENSG00000230330		0.709553	0.5037	3.12524	0.0037625	0.824321	0.734326	23 x 36		16 p12	high mobility group nucleosomal binding domain 2 pseudogene 3 [Source:HGNC Symbol;Acc:HGNC:33566]
156	ENSG00000253971		0.544241	0.363549	3.16796	0.00376421	0.824321	0.734362	15 x 19		8 q24	cell division cycle 42 pseudogene 3 [Source:HGNC Symbol;Acc:HGNC:44427]
157	ENSG00000269814		0.455685	0.294168	3.11909	0.00383454	0.824321	0.735835	31 x 34		19 q13
158	ENSG00000256827		-0.363811	-0.159308	-3.12023	0.00384466	0.824321	0.736043	7 x 18		12 q24
159	ENSG00000200033		-1.34749	-0.254162	-3.18875	0.00384752	0.824321	0.736102	26 x 7		1 q41	RNA, U6 small nuclear 403, pseudogene [Source:HGNC Symbol;Acc:HGNC:47366]
160	ENSG00000244151		0.535023	0.356141	3.11204	0.00386297	0.824321	0.736417	10 x 26		7 q36
161	ENSG00000148229	POLE3	0.609146	0.416924	3.1106	0.00387214	0.824321	0.736603	30 x 15		9 q32	DNA polymerase epsilon 3, accessory subunit [Source:HGNC Symbol;Acc:HGNC:13546]
162	ENSG00000269959	SPACA6P-AS	0.71569	0.509169	3.11871	0.00389519	0.824321	0.737067	9 x 23		19 q13	SPACA6P antisense RNA [Source:HGNC Symbol;Acc:HGNC:49383]
163	ENSG00000225282		0.602881	0.411678	3.12301	0.00389782	0.824321	0.73712	16 x 29		22 q11
164	ENSG00000141068	KSR1	-0.722474	-0.250699	-3.10125	0.00393003	0.824321	0.737759	9 x 5		17 q11	kinase suppressor of ras 1 [Source:HGNC Symbol;Acc:HGNC:6465]
165	ENSG00000270951		0.486222	0.317644	3.10651	0.00398264	0.824321	0.738784	10 x 31		20 q13
166	ENSG00000006062	MAP3K14	0.503675	0.331273	3.11558	0.00399439	0.824321	0.73901	32 x 8		17 q21	mitogen-activated protein kinase kinase kinase 14 [Source:HGNC Symbol;Acc:HGNC:6853]
167	ENSG00000185100	ADSSL1	0.867485	0.650531	3.09715	0.00404336	0.824321	0.739937	10 x 36		14 q32	adenylosuccinate synthase like 1 [Source:HGNC Symbol;Acc:HGNC:20093]
168	ENSG00000266850	LOC101927571	0.585209	0.396991	3.08823	0.00406702	0.824321	0.740378	17 x 38		18 q11
169	ENSG00000169906	S100G	0.413258	0.262336	3.11365	0.00413749	0.824321	0.741664	12 x 33		X p22	S100 calcium binding protein G [Source:HGNC Symbol;Acc:HGNC:1436]
170	ENSG00000140553	UNC45A	0.56434	0.379849	3.11373	0.00416226	0.824321	0.742107	21 x 16		15 q26	unc-45 myosin chaperone A [Source:HGNC Symbol;Acc:HGNC:30594]
171	ENSG00000161558	TMEM143	0.67239	0.470986	3.10381	0.00418703	0.824321	0.742545	18 x 15		19 q13	transmembrane protein 143 [Source:HGNC Symbol;Acc:HGNC:25603]
172	ENSG00000259843		0.336233	0.206878	3.09473	0.00419388	0.824321	0.742666	15 x 13		16 q12
173	ENSG00000008130	NADK	0.609608	0.417311	3.0721	0.00424359	0.824321	0.743528	22 x 16		1 p36	NAD kinase [Source:HGNC Symbol;Acc:HGNC:29831]
174	ENSG00000254027		0.554798	0.372085	3.07176	0.0042482	0.824321	0.743607	32 x 27		8 q21
175	ENSG00000224647		0.355036	0.220139	3.079	0.00425755	0.824321	0.743767	16 x 17		17 p13
176	ENSG00000226287	TMEM191A	0.986113	0.769133	3.12787	0.00430104	0.824321	0.744503	40 x 39		22 q11	transmembrane protein 191A (pseudogene) [Source:HGNC Symbol;Acc:HGNC:25317]
177	ENSG00000173482	PTPRM	-0.933941	-0.274031	-3.09127	0.00433693	0.824321	0.7451	6 x 4		18 p11	protein tyrosine phosphatase, receptor type M [Source:HGNC Symbol;Acc:HGNC:9675]
178	ENSG00000250722	SELENOP	-0.920268	-0.273208	-3.06342	0.00434487	0.824321	0.745231	1 x 17		5 p12	selenoprotein P [Source:HGNC Symbol;Acc:HGNC:10751]
179	ENSG00000196550	FAM72C	0.535797	0.356762	3.07779	0.00434868	0.824321	0.745294	40 x 26	A	1 q32	family with sequence similarity 72 member A [Source:HGNC Symbol;Acc:HGNC:24044]
180	ENSG00000252821		-0.302435	-0.137136	-3.05822	0.00439463	0.824321	0.746041	12 x 14		7 p14	RNA, U6 small nuclear 388, pseudogene [Source:HGNC Symbol;Acc:HGNC:47351]
181	ENSG00000204952	FBXO47	0.497559	0.32648	3.07274	0.00439755	0.824321	0.746089	21 x 33		17 q12	F-box protein 47 [Source:HGNC Symbol;Acc:HGNC:31969]
182	ENSG00000174371	EXO1	0.691626	0.487832	3.05636	0.00441664	0.824321	0.746395	40 x 26	A	1 q43	exonuclease 1 [Source:HGNC Symbol;Acc:HGNC:3511]
183	ENSG00000127311	HELB	-0.473241	-0.194103	-3.05478	0.00445459	0.824321	0.746996	7 x 17		12 q14	DNA helicase B [Source:HGNC Symbol;Acc:HGNC:17196]
184	ENSG00000100473	COCH	1.40405	1.2438	3.05463	0.00446623	0.824321	0.747179	35 x 25	B	14 q12	cochlin [Source:HGNC Symbol;Acc:HGNC:2180]
185	ENSG00000228590		0.320779	0.196114	3.07581	0.00452936	0.824321	0.748155	32 x 11		2 p16
186	ENSG00000277214		-0.368989	-0.161091	-3.04471	0.00455248	0.824321	0.748506	12 x 10		16 q23
187	ENSG00000246174	KCTD21-AS1	1.11379	0.904756	3.10235	0.00455757	0.824321	0.748583	30 x 33		11 q14	KCTD21 antisense RNA 1 [Source:HGNC Symbol;Acc:HGNC:48674]
188	ENSG00000217128	FNIP1	-0.473633	-0.194217	-3.05366	0.00459165	0.824321	0.749094	1 x 13	I	5 q31	folliculin interacting protein 1 [Source:HGNC Symbol;Acc:HGNC:29418]
189	ENSG00000250608	LOC339874	-0.753069	-0.255477	-3.04388	0.00460243	0.824321	0.749254	5 x 31		3 q22
190	ENSG00000261588		0.442622	0.28427	3.04253	0.00461864	0.824321	0.749493	16 x 28		16 p11
191	ENSG00000167702	KIFC2	1.1878	0.987153	3.13243	0.00479158	0.824321	0.751957	8 x 27	J	8 q24	kinesin family member C2 [Source:HGNC Symbol;Acc:HGNC:29530]
192	ENSG00000257880		-0.328941	-0.146946	-3.04273	0.00482233	0.824321	0.752378	21 x 33		12 q14
193	ENSG00000275454		0.369947	0.230782	3.02307	0.00486573	0.824321	0.752964	17 x 14		15 q24
194	ENSG00000198028	ZNF560	-2.09182	0	-3.04311	0.0048718	0.824321	0.753046	35 x 17		19 p13	zinc finger protein 560 [Source:HGNC Symbol;Acc:HGNC:26484]
195	ENSG00000273368		-0.343283	-0.152105	-3.01806	0.0048765	0.824321	0.753108	18 x 34		18 p11
196	ENSG00000137135	ARHGEF39	0.741911	0.532753	3.01841	0.00489024	0.824321	0.753291	40 x 27	A	9 p13	Rho guanine nucleotide exchange factor 39 [Source:HGNC Symbol;Acc:HGNC:25909]
197	ENSG00000233654		0.615098	0.421925	3.04591	0.00490846	0.824321	0.753532	19 x 26		2 q32
198	ENSG00000138750	NUP54	0.539632	0.35984	3.01619	0.00492611	0.824321	0.753764	31 x 17		4 q21	nucleoporin 54 [Source:HGNC Symbol;Acc:HGNC:17359]
199	ENSG00000157881	PANK4	0.501724	0.329742	3.02911	0.00492999	0.824321	0.753815	20 x 15		1 p36	pantothenate kinase 4 [Source:HGNC Symbol;Acc:HGNC:19366]
200	ENSG00000100865	CINP	0.638131	0.441449	3.01339	0.0049342	0.824321	0.75387	36 x 37		14 q32	cyclin dependent kinase 2 interacting protein [Source:HGNC Symbol;Acc:HGNC:23789]
201	ENSG00000159259	CHAF1B	0.631047	0.435415	3.02448	0.00493886	0.824321	0.753931	40 x 28	A	21 q22	chromatin assembly factor 1 subunit B [Source:HGNC Symbol;Acc:HGNC:1911]
202	ENSG00000231344		0.370334	0.23106	3.01496	0.00494492	0.824321	0.75401	18 x 31		1 p35
203	ENSG00000269403		0.313808	0.191297	3.01205	0.00497689	0.824321	0.754423	17 x 12		19 q13
204	ENSG00000276115		-0.624076	-0.232116	-3.04876	0.00498273	0.824321	0.754498	14 x 24		12 p11
205	ENSG00000215014		0.605236	0.413647	3.00951	0.00498365	0.824321	0.75451	30 x 33		1 p36
206	ENSG00000259707		0.381459	0.239077	3.09401	0.00499433	0.824321	0.754647	22 x 36		15 q25
207	ENSG00000196118	CCDC189	0.63382	0.437774	3.0309	0.00500263	0.824321	0.754752	6 x 31		16 p11	coiled-coil domain containing 189 [Source:HGNC Symbol;Acc:HGNC:28078]
208	ENSG00000179912	R3HDM2	-0.452188	-0.187881	-3.01011	0.00514091	0.824321	0.75647	12 x 33		12 q13	R3H domain containing 2 [Source:HGNC Symbol;Acc:HGNC:29167]
209	ENSG00000112964	GHR	-1.0743	-0.277004	-3.01265	0.00514943	0.824321	0.756573	17 x 1	G	5 p13	growth hormone receptor [Source:HGNC Symbol;Acc:HGNC:4263]
210	ENSG00000144642	RBMS3	-0.953216	-0.275031	-2.99613	0.00519969	0.824321	0.757174	16 x 1	G	3 p24	RNA binding motif single stranded interacting protein 3 [Source:HGNC Symbol;Acc:HGNC:13427]
211	ENSG00000180263	FGD6	-0.56479	-0.21855	-2.993	0.00522041	0.824321	0.757419	3 x 4	H	12 q22	FYVE, RhoGEF and PH domain containing 6 [Source:HGNC Symbol;Acc:HGNC:21740]
212	ENSG00000225948		0.437407	0.280343	2.99872	0.00527001	0.824321	0.757998	19 x 26		10 p14
213	ENSG00000135457	TFCP2	-0.386844	-0.167136	-2.99448	0.00534118	0.824321	0.758812	3 x 18		12 q13	transcription factor CP2 [Source:HGNC Symbol;Acc:HGNC:11748]
214	ENSG00000254859		0.6833	0.480517	2.98672	0.00537893	0.824321	0.759235	25 x 12		8 q24
215	ENSG00000066468	FGFR2	-0.714147	-0.249316	-2.99111	0.00552407	0.824321	0.760813	1 x 22		10 q26	fibroblast growth factor receptor 2 [Source:HGNC Symbol;Acc:HGNC:3689]
216	ENSG00000230450		0.241174	0.14258	2.97349	0.00555582	0.824321	0.761148	24 x 34		2 q21	NEK2 pseudogene 4 [Source:HGNC Symbol;Acc:HGNC:37818]
217	ENSG00000128881	TTBK2	-0.38796	-0.167509	-2.96562	0.00557777	0.824321	0.761378	5 x 4		15 q15	tau tubulin kinase 2 [Source:HGNC Symbol;Acc:HGNC:19141]
218	ENSG00000225098		-0.271438	-0.125213	-2.98197	0.00557807	0.824321	0.761381	16 x 13		22 q11	breakpoint cluster region pseudogene 1 [Source:HGNC Symbol;Acc:HGNC:39073]
219	ENSG00000171206	TRIM8	-0.536965	-0.211569	-3.0291	0.00558761	0.824321	0.76148	20 x 13		10 q24	tripartite motif containing 8 [Source:HGNC Symbol;Acc:HGNC:15579]
220	ENSG00000109685	NSD2	0.505821	0.33296	2.96445	0.00560823	0.824321	0.761694	38 x 28	A	4 p16	nuclear receptor binding SET domain protein 2 [Source:HGNC Symbol;Acc:HGNC:12766]
221	ENSG00000145730	PAM	-0.810257	-0.263136	-2.9624	0.00562385	0.824321	0.761855	8 x 4		5 q21	peptidylglycine alpha-amidating monooxygenase [Source:HGNC Symbol;Acc:HGNC:8596]
222	ENSG00000178226	PRSS36	0.548607	0.367072	2.96618	0.00563966	0.824321	0.762017	32 x 35		16 p11	protease, serine 36 [Source:HGNC Symbol;Acc:HGNC:26906]
223	ENSG00000260727		0.599283	0.408675	2.95828	0.00570245	0.824321	0.762651	24 x 19		16 p11	solute carrier family 7 member 5 pseudogene 1 [Source:HGNC Symbol;Acc:HGNC:29458]
224	ENSG00000257803		0.348695	0.215647	2.95685	0.00571087	0.824321	0.762735	26 x 19		12 q23
225	ENSG00000251151	HOXC-AS3	0.779445	0.56712	3.0795	0.00573131	0.824321	0.762939	34 x 28		12 q13	HOXC cluster antisense RNA 3 [Source:HGNC Symbol;Acc:HGNC:43751]
226	ENSG00000274833		0.245067	0.145124	2.96492	0.0057496	0.824321	0.763119	16 x 14		17 q25
227	ENSG00000185565	LSAMP	-1.42851	-0.240115	-2.96361	0.00578526	0.824321	0.763469	18 x 1	G	3 q13	limbic system-associated membrane protein [Source:HGNC Symbol;Acc:HGNC:6705]
228	ENSG00000280182		-0.343921	-0.152332	-2.97324	0.00578684	0.824321	0.763484	18 x 31		16 q23
229	ENSG00000215018	COL28A1	-1.03956	-0.277198	-2.97517	0.0058341	0.824321	0.763941	3 x 28		7 p21	collagen type XXVIII alpha 1 chain [Source:HGNC Symbol;Acc:HGNC:22442]
230	ENSG00000272655		-0.630439	-0.233466	-2.95108	0.00599239	0.824321	0.765422	28 x 34		7 p13	RNA polymerase II subunit J4, pseudogene [Source:HGNC Symbol;Acc:HGNC:28195]
231	ENSG00000200344		0.422846	0.26945	3.05167	0.006011	0.824321	0.765591	10 x 16		1 p36	Y RNA [Source:RFAM;Acc:RF00019]
232	ENSG00000279469		-0.400135	-0.171531	-2.9427	0.00602813	0.824321	0.765746	11 x 14		5 q31
233	ENSG00000234964		0.515435	0.340544	2.93548	0.00603497	0.824321	0.765808	28 x 37		11 q12	fatty acid binding protein 5 pseudogene 7 [Source:HGNC Symbol;Acc:HGNC:31070]
234	ENSG00000100354	TNRC6B	-0.46548	-0.191835	-2.94009	0.0060844	0.824321	0.76625	6 x 9	H	22 q13	trinucleotide repeat containing 6B [Source:HGNC Symbol;Acc:HGNC:29190]
235	ENSG00000196363	WDR5	0.434521	0.278175	2.92791	0.00614174	0.824321	0.766754	24 x 18		9 q34	WD repeat domain 5 [Source:HGNC Symbol;Acc:HGNC:12757]
236	ENSG00000261469		0.428943	0.273998	2.93069	0.00615631	0.824321	0.766881	24 x 15		16 q22
237	ENSG00000089902	RCOR1	0.609358	0.417101	2.92701	0.00621796	0.824321	0.767411	4 x 11		14 q32	REST corepressor 1 [Source:HGNC Symbol;Acc:HGNC:17441]
238	ENSG00000103507	BCKDK	0.409329	0.259434	2.9168	0.00632802	0.824321	0.768334	17 x 40		16 p11	branched chain ketoacid dehydrogenase kinase [Source:HGNC Symbol;Acc:HGNC:16902]
239	ENSG00000260442	ATP2A1-AS1	0.894205	0.676622	2.92663	0.00633158	0.824321	0.768363	33 x 34		16 p11	ATP2A1 antisense RNA 1 [Source:HGNC Symbol;Acc:HGNC:51370]
240	ENSG00000213199	ASIC3	1.00501	0.788681	2.93765	0.00633308	0.824321	0.768375	8 x 27	J	7 q36	acid sensing ion channel subunit 3 [Source:HGNC Symbol;Acc:HGNC:101]
241	ENSG00000260588		0.750986	0.540997	2.92917	0.00636207	0.824321	0.768613	5 x 34		8 p11
242	ENSG00000227627		0.333478	0.20495	2.91705	0.00639164	0.824321	0.768853	14 x 14		6 q25
243	ENSG00000223777		-0.339173	-0.150637	-2.93612	0.00639707	0.824321	0.768897	14 x 35		2 q31
244	ENSG00000255920		-0.549816	-0.214842	-3.02123	0.0064185	0.824321	0.76907	12 x 9		12 p13	CCND2 antisense RNA 2 [Source:HGNC Symbol;Acc:HGNC:49399]
245	ENSG00000273481		0.352236	0.218153	2.94986	0.0064554	0.824321	0.769365	19 x 31		1 q21
246	ENSG00000225914		-0.604914	-0.227926	-2.90827	0.00647008	0.824321	0.769481	23 x 28		6 p21
247	ENSG00000258216		0.312259	0.19023	2.93188	0.00649076	0.824321	0.769644	23 x 33		12 q21
248	ENSG00000203855		-0.375524	-0.163322	-2.94566	0.00650119	0.824321	0.769726	12 x 10		1 p12	hydroxy-delta-5-steroid dehydrogenase, 3 beta, pseudogene 4 [Source:HGNC Symbol;Acc:HGNC:5222]
249	ENSG00000112851	ERBIN	-0.386233	-0.166932	-2.90681	0.00654754	0.824321	0.770087	1 x 15	I	5 q12	erbb2 interacting protein [Source:HGNC Symbol;Acc:HGNC:15842]
250	ENSG00000224251		0.458786	0.296531	2.91255	0.00655188	0.824321	0.770121	34 x 20		10 p15
251	ENSG00000238045		0.576762	0.390025	2.90855	0.00656441	0.824321	0.770218	9 x 32		16 p11
252	ENSG00000138111	MFSD13A	-0.79695	-0.261501	-2.90576	0.00662167	0.824321	0.770655	23 x 20		10 q24	major facilitator superfamily domain containing 13A [Source:HGNC Symbol;Acc:HGNC:26196]
253	ENSG00000234264	DEPDC1-AS1	0.635214	0.438961	2.89697	0.00664291	0.824321	0.770815	37 x 29		1 p31	DEPDC1 antisense RNA 1 [Source:HGNC Symbol;Acc:HGNC:50592]
254	ENSG00000182979	MTA1	0.526752	0.349532	2.8972	0.00666266	0.824321	0.770964	19 x 18		14 q32	metastasis associated 1 [Source:HGNC Symbol;Acc:HGNC:7410]
255	ENSG00000113615	SEC24A	-0.478432	-0.195603	-2.89788	0.00668243	0.824321	0.771111	1 x 12	I	5 q31	SEC24 homolog A, COPII coat complex component [Source:HGNC Symbol;Acc:HGNC:10703]
256	ENSG00000143942	CHAC2	0.681301	0.478767	2.90859	0.00670096	0.824321	0.771249	37 x 28		2 p16	ChaC cation transport regulator homolog 2 [Source:HGNC Symbol;Acc:HGNC:32363]
257	ENSG00000275759		-0.796412	-0.261433	-2.93043	0.0067026	0.824321	0.771261	12 x 31		12 q24
258	ENSG00000225208		-0.29795	-0.135441	-2.93139	0.0067575	0.824321	0.771665	7 x 36		10 q24
259	ENSG00000199466		0.333921	0.20526	2.88882	0.00680175	0.824321	0.771985	14 x 17		10 q26	Y RNA [Source:RFAM;Acc:RF00019]
260	ENSG00000180875	GREM2	-0.894962	-0.271434	-2.88803	0.00682567	0.824321	0.772157	19 x 1	G	1 q43	gremlin 2, DAN family BMP antagonist [Source:HGNC Symbol;Acc:HGNC:17655]
261	ENSG00000106462	EZH2	0.758104	0.547492	2.88902	0.00683475	0.824321	0.772222	40 x 26	A	7 q36	enhancer of zeste 2 polycomb repressive complex 2 subunit [Source:HGNC Symbol;Acc:HGNC:3527]
262	ENSG00000163346	PBXIP1	-0.637133	-0.234864	-2.88776	0.00683608	0.824321	0.772232	18 x 12		1 q21	PBX homeobox interacting protein 1 [Source:HGNC Symbol;Acc:HGNC:21199]
263	ENSG00000270174	LOC101927950	-0.39414	-0.16956	-2.88751	0.006852	0.824321	0.772345	13 x 20		6 p25
264	ENSG00000145362	ANK2	-1.37234	-0.250206	-2.88343	0.00688639	0.824321	0.772588	12 x 1		4 q25	ankyrin 2 [Source:HGNC Symbol;Acc:HGNC:493]
265	ENSG00000148053	NTRK2	-0.99432	-0.276533	-2.92959	0.00690252	0.824321	0.772702	13 x 1		9 q21	neurotrophic receptor tyrosine kinase 2 [Source:HGNC Symbol;Acc:HGNC:8032]
266	ENSG00000266538		-0.440332	-0.184277	-2.89774	0.00692005	0.824321	0.772824	11 x 21		17 p12
267	ENSG00000071189	SNX13	-0.55492	-0.216119	-2.89058	0.00692425	0.824321	0.772854	2 x 14	I	7 p21	sorting nexin 13 [Source:HGNC Symbol;Acc:HGNC:21335]
268	ENSG00000167747	C19orf48	0.814509	0.599869	2.91002	0.00695559	0.824321	0.773071	37 x 30		19 q13	chromosome 19 open reading frame 48 [Source:HGNC Symbol;Acc:HGNC:29667]
269	ENSG00000272954		0.734196	0.525778	2.88902	0.00696444	0.824321	0.773132	9 x 29		22 q11
270	ENSG00000164938	TP53INP1	-0.651452	-0.237778	-2.88219	0.00697822	0.824321	0.773227	1 x 14	I	8 q22	tumor protein p53 inducible nuclear protein 1 [Source:HGNC Symbol;Acc:HGNC:18022]
271	ENSG00000246250		0.537437	0.358077	2.89252	0.00701992	0.824321	0.773512	11 x 20		11 p11
272	ENSG00000139352	ASCL1	-0.689899	-0.24509	-3.05077	0.00704063	0.824321	0.773652	3 x 35		12 q23	achaete-scute family bHLH transcription factor 1 [Source:HGNC Symbol;Acc:HGNC:738]
273	ENSG00000072364	AFF4	-0.593734	-0.225395	-2.88175	0.00704402	0.824321	0.773675	2 x 6	H	5 q31	AF4/FMR2 family member 4 [Source:HGNC Symbol;Acc:HGNC:17869]
274	ENSG00000116213	WRAP73	0.457787	0.295769	2.8709	0.00710814	0.824321	0.774104	20 x 20		1 p36	WD repeat containing, antisense to TP73 [Source:HGNC Symbol;Acc:HGNC:12759]
275	ENSG00000091483	FH	0.492948	0.322878	2.87298	0.00711765	0.824321	0.774167	37 x 32		1 q43	fumarate hydratase [Source:HGNC Symbol;Acc:HGNC:3700]
276	ENSG00000169592	INO80E	0.463104	0.299828	2.88332	0.00718359	0.824321	0.7746	32 x 35		16 p11	INO80 complex subunit E [Source:HGNC Symbol;Acc:HGNC:26905]
277	ENSG00000260677		-0.263589	-0.122116	-2.90169	0.00719069	0.824321	0.774646	19 x 32		9 q22
278	ENSG00000164241	C5orf63	-1.0515	-0.2772	-2.89437	0.00723982	0.824321	0.774963	9 x 34		5 q23	chromosome 5 open reading frame 63 [Source:HGNC Symbol;Acc:HGNC:40051]
279	ENSG00000235689		0.91532	0.697498	2.90712	0.00724589	0.824321	0.775001	34 x 14		22 q11
280	ENSG00000258658		0.350126	0.216659	2.86167	0.00726988	0.824321	0.775155	7 x 17		14 q23
281	ENSG00000105467	SYNGR4	0.623523	0.429035	2.86616	0.00729357	0.824321	0.775305	38 x 30		19 q13	synaptogyrin 4 [Source:HGNC Symbol;Acc:HGNC:11502]
282	ENSG00000228247		0.402637	0.254511	2.8587	0.00734023	0.824321	0.775598	24 x 37		1 q41	ubiquitin B pseudogene 2 [Source:HGNC Symbol;Acc:HGNC:12465]
283	ENSG00000106327	TFR2	0.926092	0.708234	2.86086	0.00735695	0.824321	0.775702	40 x 29	A	7 q22	transferrin receptor 2 [Source:HGNC Symbol;Acc:HGNC:11762]
284	ENSG00000256379		-0.308256	-0.139321	-2.89895	0.00735986	0.824321	0.77572	32 x 9		14 q11	T-cell receptor alpha variable 8-5 (pseudogene) [Source:HGNC Symbol;Acc:HGNC:12150]
285	ENSG00000205309	NT5M	0.892237	0.674689	2.85485	0.00739836	0.824321	0.775958	32 x 35		17 p11	5',3'-nucleotidase, mitochondrial [Source:HGNC Symbol;Acc:HGNC:15769]
286	ENSG00000128050	PAICS	0.544574	0.363817	2.85551	0.00740339	0.824321	0.775989	28 x 15		4 q12	phosphoribosylaminoimidazole carboxylase and phosphoribosylaminoimidazolesuccinocarboxamide synthase [Source:HGNC Symbol;Acc:HGNC:8587]
287	ENSG00000273344	PAXIP1-AS1	0.78667	0.573816	2.87436	0.00743883	0.824321	0.776206	31 x 34		7 q36	PAXIP1 antisense RNA 1 (head to head) [Source:HGNC Symbol;Acc:HGNC:27328]
288	ENSG00000272625		-0.553926	-0.215871	-2.93194	0.0074678	0.824321	0.776382	16 x 22		18 p11
289	ENSG00000167748	KLK1	1.20836	1.01053	2.85023	0.0074798	0.824321	0.776454	11 x 4		19 q13	kallikrein 1 [Source:HGNC Symbol;Acc:HGNC:6357]
290	ENSG00000140057	AK7	0.937688	0.719857	2.86843	0.00752299	0.824321	0.776713	1 x 40		14 q32	adenylate kinase 7 [Source:HGNC Symbol;Acc:HGNC:20091]
291	ENSG00000231445		-0.389884	-0.168149	-2.846	0.00755355	0.824321	0.776895	16 x 8		2 q24	translocase of inner mitochondrial membrane 8A pseudogene 1 [Source:HGNC Symbol;Acc:HGNC:17802]
292	ENSG00000274270		0.414265	0.263082	2.84541	0.00756974	0.824321	0.77699	18 x 30		13 q14
293	ENSG00000226674	TEX41	-1.19865	-0.271297	-2.96995	0.00759162	0.824321	0.777119	25 x 29		2 q22	testis expressed 41 (non-protein coding) [Source:HGNC Symbol;Acc:HGNC:48667]
294	ENSG00000176890	TYMS	0.721882	0.514707	2.8566	0.00760843	0.824321	0.777217	40 x 26	A	18 p11	thymidylate synthetase [Source:HGNC Symbol;Acc:HGNC:12441]
295	ENSG00000248559		-0.339627	-0.1508	-2.9316	0.00761257	0.824321	0.777241	13 x 33		5 q31
296	ENSG00000119048	UBE2B	-0.522163	-0.207696	-2.84306	0.00763527	0.824321	0.777373	21 x 40		5 q31	ubiquitin conjugating enzyme E2 B [Source:HGNC Symbol;Acc:HGNC:12473]
297	ENSG00000170540	ARL6IP1	0.583571	0.395637	2.84752	0.0076652	0.824321	0.777546	40 x 30	A	16 p12	ADP ribosylation factor like GTPase 6 interacting protein 1 [Source:HGNC Symbol;Acc:HGNC:697]
298	ENSG00000250874		-0.976761	-0.275996	-2.87708	0.00767744	0.824321	0.777617	26 x 31		5 q14
299	ENSG00000250584	LINC01511	0.419453	0.266928	2.86967	0.00768399	0.824321	0.777654	23 x 33		5 p15	long intergenic non-protein coding RNA 1511 [Source:HGNC Symbol;Acc:HGNC:51200]
300	ENSG00000274964		-0.685379	-0.244269	-2.85374	0.0076919	0.824321	0.7777	22 x 27		12 p11
301	ENSG00000173614	NMNAT1	0.531225	0.353102	2.84301	0.00769408	0.824321	0.777712	16 x 36		1 p36	nicotinamide nucleotide adenylyltransferase 1 [Source:HGNC Symbol;Acc:HGNC:17877]
302	ENSG00000188986	NELFB	0.376499	0.235495	2.85989	0.00771553	0.824321	0.777834	21 x 15		9 q34	negative elongation factor complex member B [Source:HGNC Symbol;Acc:HGNC:24324]
303	ENSG00000225880	LINC00115	0.475869	0.309632	2.83755	0.00773244	0.824321	0.77793	10 x 28		1 p36	long intergenic non-protein coding RNA 115 [Source:HGNC Symbol;Acc:HGNC:26211]
304	ENSG00000010319	SEMA3G	-0.903171	-0.272045	-2.84366	0.00773718	0.824321	0.777957	15 x 1		3 p21	semaphorin 3G [Source:HGNC Symbol;Acc:HGNC:30400]
305	ENSG00000258068		-0.477351	-0.195292	-2.83841	0.00773776	0.824321	0.77796	16 x 29		12 q12
306	ENSG00000170606	HSPA4	-0.512386	-0.205076	-2.84985	0.00774147	0.824321	0.777981	1 x 14	I	5 q31	heat shock protein family A (Hsp70) member 4 [Source:HGNC Symbol;Acc:HGNC:5237]
307	ENSG00000226535		0.348376	0.215422	2.83779	0.0077477	0.824321	0.778016	25 x 36		9 q31
308	ENSG00000145242	EPHA5	0.567892	0.382751	2.83794	0.00775861	0.824321	0.778078	11 x 9		4 q13	EPH receptor A5 [Source:HGNC Symbol;Acc:HGNC:3389]
309	ENSG00000258701	LINC00638	0.748908	0.539106	2.83315	0.00780181	0.824321	0.77832	5 x 33		14 q32	long intergenic non-protein coding RNA 638 [Source:HGNC Symbol;Acc:HGNC:28325]
310	ENSG00000253502		-0.357585	-0.157146	-2.83346	0.00780197	0.824321	0.778321	18 x 31		8 q11	ATPase H+ transporting V1 subunit G1 pseudogene 2 [Source:HGNC Symbol;Acc:HGNC:29359]
311	ENSG00000279923		-0.425406	-0.17964	-2.83407	0.00785378	0.824321	0.778607	13 x 32		5 p13
312	ENSG00000226161		0.276418	0.165885	2.82927	0.00788409	0.824321	0.778773	25 x 36		13 q13	eukaryotic translation initiation factor 4A1 pseudogene 5 [Source:HGNC Symbol;Acc:HGNC:37924]
313	ENSG00000197321	SVIL	-0.607092	-0.228411	-2.84033	0.007957	0.824321	0.779168	8 x 6		10 p11	supervillin [Source:HGNC Symbol;Acc:HGNC:11480]
314	ENSG00000272430		0.49786	0.326715	2.8251	0.00797165	0.824321	0.779246	29 x 35		10 q11
315	ENSG00000269779		-0.318603	-0.143162	-2.82958	0.00797771	0.824321	0.779278	22 x 31		19 p12
316	ENSG00000228519		0.549038	0.36742	2.85825	0.00798257	0.824321	0.779304	37 x 31		X p21
317	ENSG00000185024	BRF1	0.507714	0.33445	2.8325	0.00803227	0.824321	0.779568	20 x 17		14 q32	BRF1, RNA polymerase III transcription initiation factor subunit [Source:HGNC Symbol;Acc:HGNC:11551]
318	ENSG00000251692	PTX4	0.420713	0.267864	2.82855	0.00804913	0.824321	0.779656	17 x 16		16 p13	pentraxin 4 [Source:HGNC Symbol;Acc:HGNC:14171]
319	ENSG00000161973	CCDC42	-0.664364	-0.240318	-2.87678	0.00805486	0.824321	0.779687	21 x 29		17 p13	coiled-coil domain containing 42 [Source:HGNC Symbol;Acc:HGNC:26528]
320	ENSG00000274963		-0.62553	-0.232426	-2.82566	0.00805798	0.824321	0.779703	12 x 21		1 q21	RNA, 7SL, cytoplasmic 600, pseudogene [Source:HGNC Symbol;Acc:HGNC:46616]
321	ENSG00000169683	LRRC45	0.56193	0.377884	2.82598	0.0080864	0.824321	0.779851	40 x 32	A	17 q25	leucine rich repeat containing 45 [Source:HGNC Symbol;Acc:HGNC:28302]
322	ENSG00000129990	SYT5	1.79258	1.76449	2.84181	0.00814539	0.824321	0.780156	29 x 30		19 q13	synaptotagmin 5 [Source:HGNC Symbol;Acc:HGNC:11513]
323	ENSG00000146001	PCDHB18P	-0.670504	-0.241495	-2.85554	0.008201	0.824321	0.78044	17 x 6		5 q31	protocadherin beta 18 pseudogene [Source:HGNC Symbol;Acc:HGNC:14548]
324	ENSG00000117748	RPA2	0.516325	0.341249	2.81317	0.0082011	0.824321	0.78044	33 x 15		1 p35	replication protein A2 [Source:HGNC Symbol;Acc:HGNC:10290]
325	ENSG00000189410	SH2D5	0.681979	0.47936	2.81321	0.00820583	0.824321	0.780464	27 x 24		1 p36	SH2 domain containing 5 [Source:HGNC Symbol;Acc:HGNC:28819]
326	ENSG00000140521	POLG	0.530982	0.352908	2.83107	0.00823868	0.824321	0.78063	23 x 18		15 q26	DNA polymerase gamma, catalytic subunit [Source:HGNC Symbol;Acc:HGNC:9179]
327	ENSG00000258384		0.460195	0.297606	2.81251	0.00825287	0.824321	0.780701	15 x 26		15 q26
328	ENSG00000258857		0.46315	0.299864	2.82209	0.00826844	0.824321	0.780779	18 x 27		14 q21
329	ENSG00000248693		-0.65038	-0.237564	-2.81764	0.00828542	0.824321	0.780863	33 x 11		5 p14	long intergenic non-protein coding RNA 2100 [Source:HGNC Symbol;Acc:HGNC:52955]
330	ENSG00000228540		0.34325	0.211806	2.80922	0.00829564	0.824321	0.780914	16 x 32		7 q31
331	ENSG00000214248		0.534196	0.355479	2.80788	0.00831342	0.824321	0.781002	30 x 33		19 p13
332	ENSG00000165118	C9orf64	0.430888	0.275453	2.80366	0.00840033	0.824321	0.781427	1 x 13	I	9 q21	chromosome 9 open reading frame 64 [Source:HGNC Symbol;Acc:HGNC:28144]
333	ENSG00000131771	PPP1R1B	1.85443	1.85443	2.81975	0.00847115	0.824321	0.781767	39 x 19	C	17 q12	protein phosphatase 1 regulatory inhibitor subunit 1B [Source:HGNC Symbol;Acc:HGNC:9287]
334	ENSG00000136193	SCRN1	-0.668152	-0.241046	-2.80187	0.00848371	0.824321	0.781827	3 x 9	I	7 p14	secernin 1 [Source:HGNC Symbol;Acc:HGNC:22192]
335	ENSG00000262484	CCER2	0.686796	0.483584	2.8376	0.00850206	0.824321	0.781913	8 x 27	J	19 q13	coiled-coil glutamate rich protein 2 [Source:HGNC Symbol;Acc:HGNC:44662]
336	ENSG00000136897	MRPL50	0.581538	0.393959	2.81364	0.00850981	0.824321	0.78195	21 x 40		9 q31	mitochondrial ribosomal protein L50 [Source:HGNC Symbol;Acc:HGNC:16654]
337	ENSG00000144468	RHBDD1	-0.371845	-0.162069	-2.8183	0.00853617	0.824321	0.782074	4 x 13		2 q36	rhomboid domain containing 1 [Source:HGNC Symbol;Acc:HGNC:23081]
338	ENSG00000100442	FKBP3	0.574784	0.3884	2.81139	0.00854424	0.824321	0.782112	21 x 39		14 q21	FK506 binding protein 3 [Source:HGNC Symbol;Acc:HGNC:3719]
339	ENSG00000164615	CAMLG	-0.564528	-0.218486	-2.80022	0.00855075	0.824321	0.782143	20 x 40		5 q31	calcium modulating ligand [Source:HGNC Symbol;Acc:HGNC:1471]
340	ENSG00000115875	SRSF7	0.253673	0.150773	2.79462	0.00861161	0.824321	0.782426	35 x 31		2 p22	serine and arginine rich splicing factor 7 [Source:HGNC Symbol;Acc:HGNC:10789]
341	ENSG00000175643	RMI2	0.832741	0.617144	2.79849	0.00861379	0.824321	0.782436	40 x 28	A	16 p13	RecQ mediated genome instability 2 [Source:HGNC Symbol;Acc:HGNC:28349]
342	ENSG00000130695	CEP85	0.620582	0.426549	2.79855	0.00863178	0.824321	0.782518	26 x 18		1 p36	centrosomal protein 85 [Source:HGNC Symbol;Acc:HGNC:25309]
343	ENSG00000238042		-1.91297	-0.0867012	-2.84402	0.00864183	0.824321	0.782565	26 x 6		1 q41	long intergenic non-protein coding RNA 2257 [Source:HGNC Symbol;Acc:HGNC:53159]
344	ENSG00000258568		0.394509	0.24856	2.79116	0.00867868	0.824321	0.782733	26 x 19		14 q21	ras homolog family member Q pseudogene 1 [Source:HGNC Symbol;Acc:HGNC:20003]
345	ENSG00000104738	MCM4	0.489386	0.320103	2.7955	0.00868512	0.824321	0.782762	40 x 27	A	8 q11	minichromosome maintenance complex component 4 [Source:HGNC Symbol;Acc:HGNC:6947]
346	ENSG00000135924	DNAJB2	-0.593641	-0.225374	-2.78921	0.0087192	0.824321	0.782917	20 x 14		2 q35	DnaJ heat shock protein family (Hsp40) member B2 [Source:HGNC Symbol;Acc:HGNC:5228]
347	ENSG00000006757	PNPLA4	0.820308	0.605345	2.78715	0.0087522	0.824321	0.783065	14 x 40		X p22	patatin like phospholipase domain containing 4 [Source:HGNC Symbol;Acc:HGNC:24887]
348	ENSG00000224093		0.997338	0.780726	2.8587	0.00877889	0.824321	0.783184	22 x 33		1 p22
349	ENSG00000267677		0.489411	0.320123	2.7967	0.00880672	0.824321	0.783308	19 x 29		18 q21
350	ENSG00000139174	PRICKLE1	-1.02004	-0.277038	-2.78434	0.00881742	0.824321	0.783355	20 x 3	G	12 q12	prickle planar cell polarity protein 1 [Source:HGNC Symbol;Acc:HGNC:17019]
351	ENSG00000234324		-0.374569	-0.162998	-2.79035	0.00883449	0.824321	0.78343	13 x 30		17 p12
352	ENSG00000151746	BICD1	-0.681541	-0.243564	-2.78317	0.00886072	0.824321	0.783545	8 x 7		12 p11	BICD cargo adaptor 1 [Source:HGNC Symbol;Acc:HGNC:1049]
353	ENSG00000135365	PHF21A	-0.382257	-0.165599	-2.78122	0.00888751	0.824321	0.783662	9 x 11		11 p11	PHD finger protein 21A [Source:HGNC Symbol;Acc:HGNC:24156]
354	ENSG00000169085	C8orf46	0.786134	0.573319	2.78109	0.00890431	0.824321	0.783735	19 x 24		8 q13	chromosome 8 open reading frame 46 [Source:HGNC Symbol;Acc:HGNC:28498]
355	ENSG00000257270		0.70439	0.499113	2.78056	0.00892139	0.824321	0.783809	6 x 25		14 q32
356	ENSG00000204685		0.420777	0.267911	2.79415	0.00893422	0.824321	0.783864	19 x 22		2 q11	STARD7 antisense RNA 1 [Source:HGNC Symbol;Acc:HGNC:40827]
357	ENSG00000270863		0.318689	0.194667	2.77916	0.00894727	0.824321	0.78392	14 x 15		12 p13	DEAD-box helicase 55 pseudogene 1 [Source:HGNC Symbol;Acc:HGNC:49852]
358	ENSG00000157107	FCHO2	-0.474034	-0.194333	-2.79652	0.00898289	0.824321	0.784073	1 x 14	I	5 q13	FCH domain only 2 [Source:HGNC Symbol;Acc:HGNC:25180]
359	ENSG00000263970		-0.333493	-0.148595	-2.77512	0.00901999	0.824321	0.78423	16 x 32		18 p11
360	ENSG00000270733		0.387032	0.243116	2.77634	0.009035	0.824321	0.784293	15 x 16		1 p36
361	ENSG00000135824	RGS8	-0.488252	-0.198403	-2.79537	0.00908482	0.824321	0.784502	21 x 8		1 q25	regulator of G protein signaling 8 [Source:HGNC Symbol;Acc:HGNC:16810]
362	ENSG00000160072	ATAD3B	0.615999	0.422684	2.77042	0.00913173	0.824321	0.784697	9 x 26		1 p36	ATPase family, AAA domain containing 3B [Source:HGNC Symbol;Acc:HGNC:24007]
363	ENSG00000248138		-0.391634	-0.16873	-2.77832	0.00913249	0.824321	0.7847	14 x 14		4 p15
364	ENSG00000181418	DDN	0.560065	0.376365	2.79063	0.00914097	0.824321	0.784735	34 x 26	B	12 q13	dendrin [Source:HGNC Symbol;Acc:HGNC:24458]
365	ENSG00000204128	C2orf72	0.848436	0.63215	2.76796	0.00918743	0.824321	0.784926	28 x 23		2 q37	chromosome 2 open reading frame 72 [Source:HGNC Symbol;Acc:HGNC:27418]
366	ENSG00000144354	CDCA7	1.16399	0.96034	2.7674	0.00919085	0.824321	0.78494	40 x 24	C	2 q31	cell division cycle associated 7 [Source:HGNC Symbol;Acc:HGNC:14628]
367	ENSG00000203711		0.470162	0.305239	2.77166	0.00920261	0.824321	0.784988	28 x 32		6 q25	chromosome 6 open reading frame 99 [Source:HGNC Symbol;Acc:HGNC:21179]
368	ENSG00000272721		0.556058	0.373107	2.76842	0.00921783	0.824321	0.78505	30 x 33		3 q27
369	ENSG00000106415	GLCCI1	-0.639779	-0.23541	-2.76686	0.00924531	0.824321	0.785161	1 x 19		7 p21	glucocorticoid induced 1 [Source:HGNC Symbol;Acc:HGNC:18713]
370	ENSG00000231806		0.973045	0.755719	2.76673	0.00924797	0.824321	0.785171	28 x 30		9 q22	prostate cancer associated transcript 7 (non-protein coding) [Source:HGNC Symbol;Acc:HGNC:48824]
371	ENSG00000268496		0.983121	0.766055	2.76447	0.00928986	0.824321	0.78534	23 x 24		19 q13
372	ENSG00000100867	DHRS2	1.11838	0.909784	2.80144	0.00929757	0.868319	0.78537	1 x 36		14 q11	dehydrogenase/reductase 2 [Source:HGNC Symbol;Acc:HGNC:18349]
373	ENSG00000166166	TRMT61A	0.600951	0.410066	2.76858	0.00944606	0.868319	0.786552	20 x 18		14 q32	tRNA methyltransferase 61A [Source:HGNC Symbol;Acc:HGNC:23790]
374	ENSG00000260830		0.290153	0.175138	2.76332	0.00945938	0.868319	0.786656	29 x 33		14 q11
375	ENSG00000017427	IGF1	-1.14099	-0.274917	-2.79982	0.00947946	0.868319	0.786813	16 x 1	G	12 q23	insulin like growth factor 1 [Source:HGNC Symbol;Acc:HGNC:5464]
376	ENSG00000271780		0.662347	0.462266	2.75436	0.00950827	0.868319	0.787037	31 x 34		14 q32
377	ENSG00000233847		0.253041	0.150357	2.7538	0.00953812	0.868319	0.787267	11 x 16		5 q12
378	ENSG00000259515		0.433229	0.277207	2.75678	0.00955259	0.868319	0.787378	11 x 23		14 q32
379	ENSG00000116151	MORN1	0.590961	0.401754	2.75761	0.00960311	0.868319	0.787765	4 x 29		1 p36	MORN repeat containing 1 [Source:HGNC Symbol;Acc:HGNC:25852]
380	ENSG00000164828	SUN1	-0.576623	-0.2214	-2.7583	0.00964123	0.868319	0.788054	23 x 21		7 p22	Sad1 and UNC84 domain containing 1 [Source:HGNC Symbol;Acc:HGNC:18587]
381	ENSG00000086506	HBQ1	0.963579	0.746055	2.7463	0.00968404	0.868319	0.788376	32 x 30		16 p13	hemoglobin subunit theta 1 [Source:HGNC Symbol;Acc:HGNC:4833]
382	ENSG00000161664	ASB16	0.593005	0.403451	2.75181	0.00969912	0.868319	0.788489	4 x 24		17 q21	ankyrin repeat and SOCS box containing 16 [Source:HGNC Symbol;Acc:HGNC:19768]
383	ENSG00000281133		0.330287	0.202722	2.76332	0.00974803	0.868319	0.788853	19 x 32		1 p34
384	ENSG00000031003	FAM13B	-0.389247	-0.167937	-2.7666	0.00977676	0.868319	0.789065	3 x 14		5 q31	family with sequence similarity 13 member B [Source:HGNC Symbol;Acc:HGNC:1335]
385	ENSG00000164631	ZNF12	-0.481557	-0.196499	-2.74168	0.00983962	0.868319	0.789525	4 x 15		7 p22	zinc finger protein 12 [Source:HGNC Symbol;Acc:HGNC:12902]
386	ENSG00000113522	RAD50	-0.424308	-0.179294	-2.76224	0.00985415	0.868319	0.789631	1 x 14	I	5 q31	RAD50 double strand break repair protein [Source:HGNC Symbol;Acc:HGNC:9816]
387	ENSG00000254432		-0.50804	-0.203896	-2.7393	0.00989118	0.868319	0.789899	14 x 27		8 q12
388	ENSG00000182256	GABRG3	1.76383	1.72334	2.73588	0.00996623	0.868319	0.790437	32 x 24	B	15 q12	gamma-aminobutyric acid type A receptor gamma3 subunit [Source:HGNC Symbol;Acc:HGNC:4088]
389	ENSG00000171094	ALK	-1.4989	-0.225209	-2.73563	0.0100537	0.868319	0.791054	24 x 24		2 p23	ALK receptor tyrosine kinase [Source:HGNC Symbol;Acc:HGNC:427]
390	ENSG00000260193		0.476743	0.310306	2.73104	0.0100559	0.868319	0.79107	18 x 20		9 q34
391	ENSG00000160051	IQCC	0.508765	0.335277	2.76057	0.0100659	0.868319	0.791139	5 x 31		1 p35	IQ motif containing C [Source:HGNC Symbol;Acc:HGNC:25545]
392	ENSG00000273565		0.39922	0.252005	2.73983	0.0100702	0.868319	0.791169	18 x 34		14 q24
393	ENSG00000221968	FADS3	-0.623243	-0.231937	-2.74759	0.0100714	0.868319	0.791177	37 x 13		11 q12	fatty acid desaturase 3 [Source:HGNC Symbol;Acc:HGNC:3576]
394	ENSG00000004846	ABCB5	-1.07775	-0.276951	-2.74898	0.0100862	0.868319	0.791281	11 x 2		7 p21	ATP binding cassette subfamily B member 5 [Source:HGNC Symbol;Acc:HGNC:46]
395	ENSG00000281344		-0.833545	-0.265779	-2.75613	0.0101081	0.868319	0.791433	26 x 31		12 q23	HELLP associated long non-coding RNA [Source:HGNC Symbol;Acc:HGNC:43984]
396	ENSG00000226774		0.244804	0.144952	2.7294	0.0101227	0.868319	0.791534	35 x 18		X p22
397	ENSG00000140104	C14orf79	0.596415	0.406286	2.72807	0.0101325	0.868319	0.791602	6 x 33		14 q32	chromosome 14 open reading frame 79 [Source:HGNC Symbol;Acc:HGNC:20126]
398	ENSG00000173826	KCNH6	0.410588	0.260363	2.76682	0.0101338	0.868319	0.79161	1 x 33		17 q23	potassium voltage-gated channel subfamily H member 6 [Source:HGNC Symbol;Acc:HGNC:18862]
399	ENSG00000128059	PPAT	0.525514	0.348545	2.72554	0.0101951	0.868319	0.792031	29 x 16		4 q12	phosphoribosyl pyrophosphate amidotransferase [Source:HGNC Symbol;Acc:HGNC:9238]
400	ENSG00000166170	BAG5	0.474889	0.308877	2.7247	0.0102164	0.868319	0.792176	29 x 14		14 q32	BCL2 associated athanogene 5 [Source:HGNC Symbol;Acc:HGNC:941]
401	ENSG00000237886		0.809031	0.594712	2.75441	0.0102882	0.868319	0.792662	7 x 29		9 q34	NOTCH1 associated lncRNA in T-cell acute lymphoblastic leukemia 1 [Source:HGNC Symbol;Acc:HGNC:51192]
402	ENSG00000136240	KDELR2	-0.593185	-0.22527	-2.72768	0.0103015	0.868319	0.792751	32 x 15		7 p22	KDEL endoplasmic reticulum protein retention receptor 2 [Source:HGNC Symbol;Acc:HGNC:6305]
403	ENSG00000075702	WDR62	0.808441	0.594157	2.72002	0.0103362	0.868319	0.792983	40 x 26	A	19 q13	WD repeat domain 62 [Source:HGNC Symbol;Acc:HGNC:24502]
404	ENSG00000157823	AP3S2	0.506833	0.333756	2.72135	0.0103468	0.868319	0.793053	12 x 36		15 q26	adaptor related protein complex 3 sigma 2 subunit [Source:HGNC Symbol;Acc:HGNC:571]
405	ENSG00000241563	CORT	0.464262	0.300714	2.74699	0.0103498	0.868319	0.793073	14 x 27		1 p36	cortistatin [Source:HGNC Symbol;Acc:HGNC:2257]
406	ENSG00000213234		-0.259944	-0.120668	-2.71904	0.0103603	0.868319	0.793142	12 x 14		11 q23	ST13, Hsp70 interacting protein pseudogene 10 [Source:HGNC Symbol;Acc:HGNC:38745]
407	ENSG00000251768		-0.343818	-0.152296	-2.76611	0.0103953	0.868319	0.793373	9 x 15		6 q22	RNA, 5S ribosomal pseudogene 217 [Source:HGNC Symbol;Acc:HGNC:43117]
408	ENSG00000275329		0.530328	0.352385	2.71705	0.0104468	0.868319	0.793712	17 x 19		9 q34
409	ENSG00000141527	CARD14	0.958442	0.740831	2.737	0.0104671	0.868319	0.793844	18 x 19		17 q25	caspase recruitment domain family member 14 [Source:HGNC Symbol;Acc:HGNC:16446]
410	ENSG00000214264		0.301865	0.183103	2.73485	0.0105511	0.868319	0.794386	10 x 13		11 q23	potassium channel tetramerization domain containing 9 pseudogene 4 [Source:HGNC Symbol;Acc:HGNC:49913]
411	ENSG00000243187		0.337541	0.207795	2.71185	0.0105544	0.868319	0.794407	21 x 32		3 q26	CCDC39 antisense RNA 1 [Source:HGNC Symbol;Acc:HGNC:41089]
412	ENSG00000078304	PPP2R5C	0.378942	0.237257	2.71419	0.0105569	0.868319	0.794423	32 x 15		14 q32	protein phosphatase 2 regulatory subunit B'gamma [Source:HGNC Symbol;Acc:HGNC:9311]
413	ENSG00000196639	HRH1	-0.90352	-0.27207	-2.72065	0.010571	0.868319	0.794513	26 x 5		3 p25	histamine receptor H1 [Source:HGNC Symbol;Acc:HGNC:5182]
414	ENSG00000171385	KCND3	-1.10776	-0.276239	-2.71065	0.0105971	0.868319	0.79468	2 x 2	H	1 p13	potassium voltage-gated channel subfamily D member 3 [Source:HGNC Symbol;Acc:HGNC:6239]
415	ENSG00000229660		0.626713	0.431737	2.76718	0.0106057	0.868319	0.794734	14 x 36		7 q36
416	ENSG00000140534	TICRR	0.741065	0.531987	2.70939	0.010606	0.868319	0.794737	40 x 26	A	15 q26	TOPBP1 interacting checkpoint and replication regulator [Source:HGNC Symbol;Acc:HGNC:28704]
417	ENSG00000253305	PCDHGB6	-1.08553	-0.27681	-2.71516	0.0106833	0.868319	0.795224	7 x 4		5 q31	protocadherin gamma subfamily B, 6 [Source:HGNC Symbol;Acc:HGNC:8713]
418	ENSG00000279118		-0.617214	-0.230637	-2.70783	0.0107126	0.868319	0.795407	18 x 4		5 q23
419	ENSG00000185697	MYBL1	0.69182	0.488002	2.72387	0.0107131	0.868319	0.795411	40 x 26	A	8 q13	MYB proto-oncogene like 1 [Source:HGNC Symbol;Acc:HGNC:7547]
420	ENSG00000249996		-0.432039	-0.181715	-2.70851	0.0107482	0.868319	0.795629	7 x 9		5 q23
421	ENSG00000273777	CEACAM20	0.25753	0.153317	2.70561	0.0107929	0.868319	0.795905	14 x 12		19 q13	carcinoembryonic antigen related cell adhesion molecule 20 [Source:HGNC Symbol;Acc:HGNC:24879]
422	ENSG00000248167	TRIM39-RPP21	-0.295828	-0.134636	-2.73997	0.0108339	0.868319	0.796156	18 x 33		6 p22	TRIM39-RPP21 readthrough [Source:HGNC Symbol;Acc:HGNC:38845]
423	ENSG00000111404	RERGL	-0.906594	-0.27229	-2.82259	0.0108389	0.868319	0.796186	14 x 1		12 p12	RERG like [Source:HGNC Symbol;Acc:HGNC:26213]
424	ENSG00000137675	MMP27	0.303712	0.184366	2.73967	0.0108718	0.868319	0.796386	11 x 8		11 q22	matrix metallopeptidase 27 [Source:HGNC Symbol;Acc:HGNC:14250]
425	ENSG00000232098		0.777223	0.565066	2.77849	0.0109025	0.868319	0.796572	6 x 18		19 q13
426	ENSG00000227925	LINC01655	-1.44689	-0.236465	-2.73713	0.0109163	0.868319	0.796655	26 x 6		1 q41	long intergenic non-protein coding RNA 1655 [Source:HGNC Symbol;Acc:HGNC:52443]
427	ENSG00000179918	SEPHS2	0.456845	0.295052	2.71872	0.0109471	0.868319	0.796841	27 x 14		16 p11	selenophosphate synthetase 2 [Source:HGNC Symbol;Acc:HGNC:19686]
428	ENSG00000110665	C11orf21	-0.792123	-0.260886	-2.73529	0.0110297	0.868319	0.797332	34 x 6		11 p15	chromosome 11 open reading frame 21 [Source:HGNC Symbol;Acc:HGNC:13231]
429	ENSG00000261773		0.531265	0.353134	2.69299	0.011054	0.868319	0.797476	16 x 25		X q28
430	ENSG00000131462	TUBG1	0.535612	0.356614	2.69391	0.0110569	0.868319	0.797493	39 x 30	A	17 q21	tubulin gamma 1 [Source:HGNC Symbol;Acc:HGNC:12417]
431	ENSG00000075336	TIMM21	0.388093	0.243887	2.70369	0.0110889	0.868319	0.79768	32 x 17		18 q22	translocase of inner mitochondrial membrane 21 [Source:HGNC Symbol;Acc:HGNC:25010]
432	ENSG00000250410		-0.407971	-0.17408	-2.7326	0.0111031	0.868319	0.797763	12 x 21		4 q35
433	ENSG00000079691	CARMIL1	-0.483265	-0.196987	-2.69167	0.0111444	0.868319	0.798003	6 x 11		6 p22	capping protein regulator and myosin 1 linker 1 [Source:HGNC Symbol;Acc:HGNC:21581]
434	ENSG00000267080	ASB16-AS1	0.564103	0.379655	2.68699	0.0112404	0.868319	0.798556	9 x 32		17 q21	ASB16 antisense RNA 1 [Source:HGNC Symbol;Acc:HGNC:25442]
435	ENSG00000157870	FAM213B	0.670925	0.469711	2.6988	0.011252	0.868319	0.798622	20 x 15		1 p36	family with sequence similarity 213 member B [Source:HGNC Symbol;Acc:HGNC:28390]
436	ENSG00000236698		0.545118	0.364256	2.69019	0.0112712	0.868319	0.798731	24 x 37		1 p36	eukaryotic translation initiation factor 1A, X-linked pseudogene 1 [Source:HGNC Symbol;Acc:HGNC:19900]
437	ENSG00000111432	FZD10	-1.38701	-0.247725	-2.71225	0.0112746	0.868319	0.79875	8 x 1		12 q24	frizzled class receptor 10 [Source:HGNC Symbol;Acc:HGNC:4039]
438	ENSG00000117305	HMGCL	0.53644	0.357277	2.68411	0.011296	0.868319	0.798872	16 x 40		1 p36	3-hydroxymethyl-3-methylglutaryl-CoA lyase [Source:HGNC Symbol;Acc:HGNC:5005]
439	ENSG00000115850	LCT	0.486599	0.317937	2.71411	0.0112992	0.868319	0.79889	39 x 22	C	2 q21	lactase [Source:HGNC Symbol;Acc:HGNC:6530]
440	ENSG00000064201	TSPAN32	-0.929185	-0.273755	-2.78199	0.0113296	0.868319	0.799061	22 x 25		11 p15	tetraspanin 32 [Source:HGNC Symbol;Acc:HGNC:13410]
441	ENSG00000165704	HPRT1	0.769925	0.558336	2.69187	0.0113389	0.868319	0.799113	39 x 31	A	X q26	hypoxanthine phosphoribosyltransferase 1 [Source:HGNC Symbol;Acc:HGNC:5157]
442	ENSG00000225766		0.436467	0.279636	2.68975	0.0113854	0.868319	0.799373	8 x 33		14 q11	dehydrogenase/reductase 4 like 1 [Source:HGNC Symbol;Acc:HGNC:19732]
443	ENSG00000156381	ANKRD9	0.712421	0.506253	2.68739	0.011417	0.868319	0.79955	20 x 15		14 q32	ankyrin repeat domain 9 [Source:HGNC Symbol;Acc:HGNC:20096]
444	ENSG00000197734	C14orf178	0.362313	0.225319	2.67833	0.0114774	0.868319	0.799883	18 x 31		14 q24	chromosome 14 open reading frame 178 [Source:HGNC Symbol;Acc:HGNC:26385]
445	ENSG00000119703	ZC2HC1C	0.480265	0.313027	2.67586	0.0115164	0.868319	0.800097	3 x 32		14 q24	zinc finger C2HC-type containing 1C [Source:HGNC Symbol;Acc:HGNC:20354]
446	ENSG00000179403	VWA1	0.72994	0.521943	2.73103	0.0115223	0.868319	0.800129	21 x 14		1 p36	von Willebrand factor A domain containing 1 [Source:HGNC Symbol;Acc:HGNC:30910]
447	ENSG00000271833		0.324035	0.198371	2.68575	0.0115379	0.868319	0.800214	15 x 26		9 q33
448	ENSG00000074800	ENO1	0.635638	0.439323	2.69953	0.0115639	0.868319	0.800355	36 x 29		1 p36	enolase 1 [Source:HGNC Symbol;Acc:HGNC:3350]
449	ENSG00000071282	LMCD1	-0.560364	-0.217466	-2.676	0.0115968	0.868319	0.800532	23 x 7		3 p25	LIM and cysteine rich domains 1 [Source:HGNC Symbol;Acc:HGNC:6633]
450	ENSG00000197614	MFAP5	-1.56203	-0.209707	-2.71509	0.0116209	0.868319	0.800662	22 x 1	G	12 p13	microfibril associated protein 5 [Source:HGNC Symbol;Acc:HGNC:29673]
451	ENSG00000151422	FER	-0.549029	-0.214644	-2.67133	0.0116416	0.868319	0.800773	6 x 5		5 q21	FER tyrosine kinase [Source:HGNC Symbol;Acc:HGNC:3655]
452	ENSG00000102878	HSF4	0.907581	0.68982	2.67922	0.0117091	0.868319	0.801132	7 x 27	J	16 q22	heat shock transcription factor 4 [Source:HGNC Symbol;Acc:HGNC:5227]
453	ENSG00000073670	ADAM11	0.725619	0.518059	2.66876	0.0117211	0.868319	0.801195	29 x 26		17 q21	ADAM metallopeptidase domain 11 [Source:HGNC Symbol;Acc:HGNC:189]
454	ENSG00000279205		-0.527676	-0.209151	-2.66818	0.0117356	0.868319	0.801272	12 x 36		2 q31
455	ENSG00000230552		-0.582005	-0.222673	-2.6691	0.0117452	0.868319	0.801323	12 x 35		2 q31
456	ENSG00000137817	PARP6	0.486165	0.317599	2.66965	0.011769	0.868319	0.801448	17 x 21		15 q23	poly(ADP-ribose) polymerase family member 6 [Source:HGNC Symbol;Acc:HGNC:26921]
457	ENSG00000168631	DPCR1	-0.641232	-0.235709	-2.70221	0.01183	0.868319	0.801766	11 x 11		6 p21	diffuse panbronchiolitis critical region 1 [Source:HGNC Symbol;Acc:HGNC:21666]
458	ENSG00000230882		0.949944	0.732216	2.66498	0.011844	0.868319	0.801839	8 x 40	K	7 q11
459	ENSG00000160298	C21orf58	0.605181	0.413601	2.66587	0.011904	0.868319	0.802149	9 x 28		21 q22	chromosome 21 open reading frame 58 [Source:HGNC Symbol;Acc:HGNC:1300]
460	ENSG00000280304		-0.431655	-0.181595	-2.73851	0.0119159	0.868319	0.802209	9 x 4		15 q26
461	ENSG00000168916	ZNF608	-0.802966	-0.262251	-2.66087	0.0119432	0.868319	0.802349	8 x 5		5 q23	zinc finger protein 608 [Source:HGNC Symbol;Acc:HGNC:29238]
462	ENSG00000120942	UBIAD1	0.467338	0.303071	2.66267	0.01198	0.868319	0.802537	24 x 14		1 p36	UbiA prenyltransferase domain containing 1 [Source:HGNC Symbol;Acc:HGNC:30791]
463	ENSG00000258545	RHOXF1-AS1	-1.31549	-0.258792	-2.78169	0.0119841	0.868319	0.802557	22 x 25		X q24	RHOXF1 antisense RNA 1 [Source:HGNC Symbol;Acc:HGNC:51582]
464	ENSG00000086232	EIF2AK1	-0.526942	-0.208958	-2.65929	0.0120095	0.868319	0.802686	21 x 36		7 p22	eukaryotic translation initiation factor 2 alpha kinase 1 [Source:HGNC Symbol;Acc:HGNC:24921]
465	ENSG00000055130	CUL1	0.350665	0.21704	2.65722	0.0120751	0.868319	0.803015	32 x 16		7 q36	cullin 1 [Source:HGNC Symbol;Acc:HGNC:2551]
466	ENSG00000136875	PRPF4	0.54081	0.360787	2.65965	0.0121216	0.868319	0.803247	28 x 16		9 q32	pre-mRNA processing factor 4 [Source:HGNC Symbol;Acc:HGNC:17349]
467	ENSG00000267480		0.532215	0.353894	2.65647	0.0121446	0.868319	0.803361	37 x 22	C	18 p11
468	ENSG00000119723	COQ6	0.356603	0.221252	2.65638	0.0121464	0.868319	0.80337	19 x 39		14 q24	coenzyme Q6, monooxygenase [Source:HGNC Symbol;Acc:HGNC:20233]
469	ENSG00000198901	PRC1	0.69999	0.495215	2.66262	0.0121487	0.868319	0.803382	40 x 26	A	15 q26	protein regulator of cytokinesis 1 [Source:HGNC Symbol;Acc:HGNC:9341]
470	ENSG00000160284	SPATC1L	-0.840584	-0.266524	-2.66388	0.0121909	0.868319	0.803589	32 x 31		21 q22	spermatogenesis and centriole associated 1 like [Source:HGNC Symbol;Acc:HGNC:1298]
471	ENSG00000186265	BTLA	-0.769066	-0.257786	-2.65274	0.0121991	0.868319	0.80363	35 x 7		3 q13	B and T lymphocyte associated [Source:HGNC Symbol;Acc:HGNC:21087]
472	ENSG00000274425		0.481432	0.313931	2.67475	0.0122008	0.868319	0.803638	30 x 33		19 p13
473	ENSG00000234948	LINC01524	-0.342084	-0.151678	-2.68076	0.012252	0.868319	0.803888	24 x 31		20 q13	long intergenic non-protein coding RNA 1524 [Source:HGNC Symbol;Acc:HGNC:51228]
474	ENSG00000179284	DAND5	0.696503	0.492132	2.64948	0.0122938	0.868319	0.804091	32 x 32		19 p13	DAN domain BMP antagonist family member 5 [Source:HGNC Symbol;Acc:HGNC:26780]
475	ENSG00000014138	POLA2	0.47927	0.312258	2.65256	0.0123151	0.868319	0.804194	40 x 29	A	11 q13	DNA polymerase alpha 2, accessory subunit [Source:HGNC Symbol;Acc:HGNC:30073]
476	ENSG00000265413		-0.493074	-0.19976	-2.73593	0.0123255	0.868319	0.804244	9 x 20		18 p11
477	ENSG00000243063		-0.693986	-0.245823	-2.69179	0.0123285	0.868319	0.804259	39 x 2	E	2 p11	immunoglobulin kappa variable 3-7 (non-functional) [Source:HGNC Symbol;Acc:HGNC:5821]
478	ENSG00000184990	SIVA1	0.744301	0.53492	2.65582	0.0123326	0.868319	0.804278	38 x 40		14 q32	SIVA1 apoptosis inducing factor [Source:HGNC Symbol;Acc:HGNC:17712]
479	ENSG00000171130	ATP6V0E2	0.835607	0.619875	2.67444	0.012345	0.868319	0.804338	17 x 40		7 q36	ATPase H+ transporting V0 subunit e2 [Source:HGNC Symbol;Acc:HGNC:21723]
480	ENSG00000276975		-0.7446	-0.254202	-2.66808	0.0123495	0.868319	0.804359	2 x 26		1 q21	HYDIN2, axonemal central pair apparatus protein (pseudogene) [Source:HGNC Symbol;Acc:HGNC:33129]
481	ENSG00000257114	LINC02450	-0.959204	-0.275303	-2.65221	0.0124145	0.868319	0.80467	36 x 14		12 q12	long intergenic non-protein coding RNA 2450 [Source:HGNC Symbol;Acc:HGNC:53382]
482	ENSG00000247735		0.673411	0.471875	2.64334	0.0124616	0.868319	0.804893	1 x 9	I	16 p11
483	ENSG00000214654		0.756703	0.546212	2.65349	0.0124682	0.868319	0.804924	1 x 9	I	9 q33	Putative UDP-GlcNAc:betaGal beta-1,3-N-acetylglucosaminyltransferase LOC100288842 [Source:UniProtKB/Swiss-Prot;Acc:A8MXE2]
484	ENSG00000175279	CENPS	0.569465	0.384038	2.6459	0.0124755	0.868319	0.804958	35 x 33		1 p36	centromere protein S [Source:HGNC Symbol;Acc:HGNC:23163]
485	ENSG00000273693		0.366408	0.228246	2.67718	0.0125426	0.868319	0.805273	18 x 33		Y q11	chromosome 2 open reading frame 27A pseudogene 1 [Source:HGNC Symbol;Acc:HGNC:38413]
486	ENSG00000213061		0.267344	0.159825	2.6517	0.0125796	0.868319	0.805445	10 x 13		10 q24	profilin 1 pseudogene 11 [Source:HGNC Symbol;Acc:HGNC:42994]
487	ENSG00000147224	PRPS1	0.44697	0.287555	2.64076	0.0125842	0.868319	0.805466	31 x 15		X q22	phosphoribosyl pyrophosphate synthetase 1 [Source:HGNC Symbol;Acc:HGNC:9462]
488	ENSG00000177981	ASB8	-0.263772	-0.122189	-2.66063	0.0125856	0.868319	0.805472	1 x 16	I	12 q13	ankyrin repeat and SOCS box containing 8 [Source:HGNC Symbol;Acc:HGNC:17183]
489	ENSG00000071242	RPS6KA2	-0.695396	-0.246074	-2.63848	0.0126513	0.868319	0.805775	7 x 5		6 q27	ribosomal protein S6 kinase A2 [Source:HGNC Symbol;Acc:HGNC:10431]
490	ENSG00000237437		0.379011	0.237307	2.63874	0.0126616	0.868319	0.805823	9 x 14		9 p21	argininosuccinate synthetase 1 pseudogene 12 [Source:HGNC Symbol;Acc:HGNC:762]
491	ENSG00000236039	LOC101927630	-0.75011	-0.255035	-2.65316	0.0126978	0.868319	0.805988	11 x 36		7 p21
492	ENSG00000099899	TRMT2A	0.375983	0.235123	2.63363	0.0127953	0.868319	0.806429	32 x 35		22 q11	tRNA methyltransferase 2 homolog A [Source:HGNC Symbol;Acc:HGNC:24974]
493	ENSG00000277452		-0.563099	-0.218137	-2.63257	0.0128042	0.868319	0.806469	11 x 21		1 q21	RNA, 7SL, cytoplasmic 473, pseudogene [Source:HGNC Symbol;Acc:HGNC:46489]
494	ENSG00000237476	LINC01637	0.631716	0.435984	2.63773	0.0128051	0.868319	0.806473	16 x 40		22 q11	long intergenic non-protein coding RNA 1637 [Source:HGNC Symbol;Acc:HGNC:52424]
495	ENSG00000075886	TUBA3D	0.611859	0.419201	2.63063	0.0128574	0.868319	0.806707	6 x 40	K	2 q21	tubulin alpha 3d [Source:HGNC Symbol;Acc:HGNC:24071]
496	ENSG00000224761		0.300364	0.182078	2.635	0.0128764	0.868319	0.806792	10 x 13		10 p11
497	ENSG00000254244		0.350093	0.216636	2.63439	0.0129062	0.868319	0.806923	24 x 37		8 p23	phosphoribosylaminoimidazole carboxylase, phosphoribosylaminoimidazole succinocarboxamide synthetase pseudogene 4 [Source:HGNC Symbol;Acc:HGNC:38097]
498	ENSG00000271072		0.297625	0.180211	2.63253	0.0129078	0.868319	0.806931	23 x 35		15 q24	prohibitin pseudogene 20 [Source:HGNC Symbol;Acc:HGNC:51553]
499	ENSG00000108773	KAT2A	0.460085	0.297522	2.62817	0.0129483	0.868319	0.807109	8 x 29		17 q21	lysine acetyltransferase 2A [Source:HGNC Symbol;Acc:HGNC:4201]
500	ENSG00000270372		-1.6131	-0.195686	-2.64615	0.012985	0.868319	0.80727	26 x 31		9 p23
501	ENSG00000274653		0.611579	0.418966	2.63496	0.013004	0.868319	0.807353	7 x 32		16 p11
502	ENSG00000135776	ABCB10	0.485942	0.317426	2.62725	0.0130172	0.868319	0.80741	29 x 17		1 q42	ATP binding cassette subfamily B member 10 [Source:HGNC Symbol;Acc:HGNC:41]
503	ENSG00000064652	SNX24	-0.491323	-0.199268	-2.62915	0.0130366	0.868319	0.807495	15 x 36		5 q23	sorting nexin 24 [Source:HGNC Symbol;Acc:HGNC:21533]
504	ENSG00000131153	GINS2	0.693781	0.489731	2.62699	0.0130766	0.868319	0.807667	40 x 28	A	16 q24	GINS complex subunit 2 [Source:HGNC Symbol;Acc:HGNC:24575]
505	ENSG00000273901		0.374586	0.234117	2.62892	0.0130801	0.868319	0.807683	8 x 33		19 q13
506	ENSG00000179593	ALOX15B	-1.30472	-0.260234	-2.66636	0.0132028	0.868319	0.808207	25 x 7		17 p13	arachidonate 15-lipoxygenase, type B [Source:HGNC Symbol;Acc:HGNC:434]
507	ENSG00000272896		0.408089	0.258521	2.62296	0.0132593	0.868319	0.808446	18 x 33		9 q34
508	ENSG00000242375		-0.30911	-0.13964	-2.63213	0.0132808	0.868319	0.808536	21 x 37		9 q22
509	ENSG00000260941	LINC00622	-0.666615	-0.240751	-2.6167	0.0132936	0.868319	0.808589	17 x 8		1 p12	long intergenic non-protein coding RNA 622 [Source:HGNC Symbol;Acc:HGNC:44251]
510	ENSG00000238227	TMEM250	0.425195	0.2712	2.61595	0.0133162	0.868319	0.808684	21 x 15		9 q34	transmembrane protein 250 [Source:HGNC Symbol;Acc:HGNC:31009]
511	ENSG00000144021	CIAO1	0.30549	0.185583	2.61666	0.0133743	0.868319	0.808925	26 x 16		2 q11	cytosolic iron-sulfur assembly component 1 [Source:HGNC Symbol;Acc:HGNC:14280]
512	ENSG00000271989		0.422185	0.268958	2.64223	0.0133914	0.868319	0.808996	28 x 33		1 p36
513	ENSG00000200135		-0.243702	-0.114131	-2.6336	0.0134657	0.868319	0.809301	12 x 17		12 q24	Y RNA [Source:RFAM;Acc:RF00019]
514	ENSG00000138030	KHK	0.734676	0.526212	2.61625	0.0134738	0.868319	0.809334	34 x 30		2 p23	ketohexokinase [Source:HGNC Symbol;Acc:HGNC:6315]
515	ENSG00000165689	SDCCAG3	0.490988	0.32135	2.61055	0.0135088	0.868319	0.809477	24 x 16		9 q34	serologically defined colon cancer antigen 3 [Source:HGNC Symbol;Acc:HGNC:10667]
516	ENSG00000139793	MBNL2	-0.567487	-0.219206	-2.62329	0.0135183	0.868319	0.809515	9 x 7		13 q32	muscleblind like splicing regulator 2 [Source:HGNC Symbol;Acc:HGNC:16746]
517	ENSG00000008952	SEC62	-0.453178	-0.188178	-2.61352	0.0135576	0.868319	0.809674	1 x 15	I	3 q26	SEC62 homolog, preprotein translocation factor [Source:HGNC Symbol;Acc:HGNC:11846]
518	ENSG00000230825		-0.454769	-0.188656	-2.61804	0.0136956	0.868319	0.810225	17 x 29		7 p21
519	ENSG00000184277	TM2D3	0.509177	0.335602	2.60333	0.0137467	0.868319	0.810427	22 x 39		15 q26	TM2 domain containing 3 [Source:HGNC Symbol;Acc:HGNC:24128]
520	ENSG00000100479	POLE2	0.69727	0.49281	2.6391	0.0137896	0.868319	0.810595	39 x 28	A	14 q21	DNA polymerase epsilon 2, accessory subunit [Source:HGNC Symbol;Acc:HGNC:9178]
521	ENSG00000218537		0.601334	0.410387	2.61111	0.0137917	0.868319	0.810603	29 x 36		22 q11	MIF antisense RNA 1 [Source:HGNC Symbol;Acc:HGNC:27669]
522	ENSG00000276715	YWHAEP7	-1.27271	-0.264173	-2.61203	0.0138197	0.868319	0.810713	14 x 36		17 q12	tyrosine 3-monooxygenase/tryptophan 5-monooxygenase activation protein epsilon pseudogene 7 [Source:HGNC Symbol;Acc:HGNC:49437]
523	ENSG00000177483	RBM44	-0.606737	-0.228332	-2.64021	0.0138244	0.868319	0.810731	10 x 19		2 q37	RNA binding motif protein 44 [Source:HGNC Symbol;Acc:HGNC:24756]
524	ENSG00000136699	SMPD4	0.441205	0.283202	2.60166	0.0138257	0.868319	0.810736	24 x 19		2 q21	sphingomyelin phosphodiesterase 4 [Source:HGNC Symbol;Acc:HGNC:32949]
525	ENSG00000118058	KMT2A	-0.356985	-0.156937	-2.60083	0.0138439	0.868319	0.810807	6 x 7	H	11 q23	lysine methyltransferase 2A [Source:HGNC Symbol;Acc:HGNC:7132]
526	ENSG00000049541	RFC2	0.407752	0.258272	2.60833	0.0138787	0.868319	0.810941	38 x 29		7 q11	replication factor C subunit 2 [Source:HGNC Symbol;Acc:HGNC:9970]
527	ENSG00000269720	LOC105372343	0.852922	0.636462	2.61313	0.0138814	0.868319	0.810952	9 x 25		19 p13	coiled-coil domain containing 194 [Source:HGNC Symbol;Acc:HGNC:53438]
528	ENSG00000260285		0.731613	0.52345	2.60071	0.0138961	0.868319	0.811009	7 x 26	J	14 q32
529	ENSG00000258702		1.02031	0.804653	2.60012	0.0139153	0.868319	0.811082	17 x 34		14 q32
530	ENSG00000236318		-1.93188	-0.0783027	-2.61018	0.0139483	0.868319	0.811209	34 x 13		7 p21
531	ENSG00000224870	LOC148413	0.536412	0.357255	2.60838	0.0139932	0.868319	0.81138	20 x 17		1 p36
532	ENSG00000165661	QSOX2	0.476668	0.310248	2.60008	0.0139998	0.868319	0.811405	24 x 20		9 q34	quiescin sulfhydryl oxidase 2 [Source:HGNC Symbol;Acc:HGNC:30249]
533	ENSG00000223723		0.53105	0.352962	2.61759	0.0140179	0.868319	0.811474	35 x 22	B	X p21
534	ENSG00000169955	ZNF747	0.385196	0.241784	2.62051	0.0140208	0.868319	0.811485	17 x 40		16 p11	zinc finger protein 747 [Source:HGNC Symbol;Acc:HGNC:28350]
535	ENSG00000142208	AKT1	0.518227	0.342755	2.59569	0.0140938	0.868319	0.81176	22 x 14		14 q32	AKT serine/threonine kinase 1 [Source:HGNC Symbol;Acc:HGNC:391]
536	ENSG00000213290		0.432585	0.276724	2.60022	0.0141592	0.868319	0.812004	24 x 36		19 p13	phosphoglycerate kinase 1, pseudogene 2 [Source:HGNC Symbol;Acc:HGNC:8899]
537	ENSG00000263412		0.60301	0.411787	2.59184	0.0141787	0.868319	0.812077	9 x 30		17 q21
538	ENSG00000157426	AASDH	0.458951	0.296656	2.59105	0.0141919	0.868319	0.812126	2 x 12	I	4 q12	aminoadipate-semialdehyde dehydrogenase [Source:HGNC Symbol;Acc:HGNC:23993]
539	ENSG00000263080	LOC105371083	0.541944	0.361699	2.60063	0.014192	0.868319	0.812126	29 x 33		16 p13
540	ENSG00000136213	CHST12	-0.432406	-0.181829	-2.58939	0.014205	0.868319	0.812174	19 x 13		7 p22	carbohydrate sulfotransferase 12 [Source:HGNC Symbol;Acc:HGNC:17423]
541	ENSG00000143476	DTL	0.616629	0.423214	2.60556	0.0142169	0.868319	0.812218	40 x 26	A	1 q32	denticleless E3 ubiquitin protein ligase homolog [Source:HGNC Symbol;Acc:HGNC:30288]
542	ENSG00000250337	LINC01021	-0.79974	-0.261851	-2.65194	0.0142221	0.868319	0.812237	25 x 32		5 p14	long intergenic non-protein coding RNA 1021 [Source:HGNC Symbol;Acc:HGNC:48995]
543	ENSG00000132016	C19orf57	0.781788	0.569288	2.60184	0.0142465	0.868319	0.812327	36 x 27	B	19 p13	chromosome 19 open reading frame 57 [Source:HGNC Symbol;Acc:HGNC:28153]
544	ENSG00000280789	PAGR1	0.382426	0.239776	2.60145	0.0142523	0.868319	0.812349	31 x 33		16 p11	PAXIP1 associated glutamate rich protein 1 [Source:HGNC Symbol;Acc:HGNC:28707]
545	ENSG00000197785	ATAD3A	0.564203	0.379737	2.58666	0.014318	0.868319	0.812589	20 x 18		1 p36	ATPase family, AAA domain containing 3A [Source:HGNC Symbol;Acc:HGNC:25567]
546	ENSG00000166851	PLK1	0.68197	0.479352	2.58584	0.0143188	0.868319	0.812592	40 x 26	A	16 p12	polo like kinase 1 [Source:HGNC Symbol;Acc:HGNC:9077]
547	ENSG00000005961	ITGA2B	0.833481	0.617849	2.60099	0.0143225	0.868319	0.812605	30 x 30		17 q21	integrin subunit alpha 2b [Source:HGNC Symbol;Acc:HGNC:6138]
548	ENSG00000254428		-0.436554	-0.183114	-2.58486	0.0143543	0.868319	0.812721	6 x 22		11 q23
549	ENSG00000196873	CBWD3	0.43211	0.276368	2.58517	0.0143699	0.868319	0.812777	10 x 29		9 q21	COBW domain containing 3 [Source:HGNC Symbol;Acc:HGNC:18519]
550	ENSG00000213225		1.37874	1.21254	2.67564	0.0143912	0.868319	0.812854	22 x 12		2 q21	NOC2 like nucleolar associated transcriptional repressor pseudogene 1 [Source:HGNC Symbol;Acc:HGNC:52285]
551	ENSG00000149639	SOGA1	-0.56437	-0.218448	-2.59422	0.0144004	0.868319	0.812887	1 x 7	H	20 q11	suppressor of glucose, autophagy associated 1 [Source:HGNC Symbol;Acc:HGNC:16111]
552	ENSG00000117525	F3	-0.879497	-0.27019	-2.61002	0.0144325	0.868319	0.813003	15 x 3		1 p21	coagulation factor III, tissue factor [Source:HGNC Symbol;Acc:HGNC:3541]
553	ENSG00000151876	FBXO4	0.492605	0.322611	2.58835	0.0144346	0.868319	0.81301	19 x 39		5 p13	F-box protein 4 [Source:HGNC Symbol;Acc:HGNC:13583]
554	ENSG00000237838		0.356199	0.220965	2.59498	0.0145321	0.868319	0.813358	28 x 20		3 p24
555	ENSG00000178700	DHFR2	-0.426444	-0.179966	-2.57841	0.0146059	0.868319	0.813618	2 x 18		3 q11	dihydrofolate reductase 2 [Source:HGNC Symbol;Acc:HGNC:27309]
556	ENSG00000272933		-0.628292	-0.233012	-2.57513	0.0148031	0.868319	0.814301	2 x 5	H	10 q24
557	ENSG00000197165	SULT1A2	0.627207	0.432156	2.57512	0.0148171	0.868319	0.814349	9 x 38	K	16 p11	sulfotransferase family 1A member 2 [Source:HGNC Symbol;Acc:HGNC:11454]
558	ENSG00000148842	CNNM2	-0.553664	-0.215806	-2.58163	0.0148361	0.868319	0.814414	24 x 18		10 q24	cyclin and CBS domain divalent metal cation transport mediator 2 [Source:HGNC Symbol;Acc:HGNC:103]
559	ENSG00000178202	KDELC2	0.492663	0.322656	2.56858	0.0149273	0.868319	0.814723	24 x 8		11 q22	KDEL motif containing 2 [Source:HGNC Symbol;Acc:HGNC:28496]
560	ENSG00000143341	HMCN1	-0.867769	-0.269166	-2.57017	0.0149282	0.868319	0.814726	20 x 2	G	1 q25	hemicentin 1 [Source:HGNC Symbol;Acc:HGNC:19194]
561	ENSG00000180914	OXTR	-1.50831	-0.223028	-2.57095	0.014955	0.868319	0.814816	10 x 6		3 p25	oxytocin receptor [Source:HGNC Symbol;Acc:HGNC:8529]
562	ENSG00000196366		0.59698	0.406756	2.56846	0.0150207	0.868319	0.815036	7 x 30		9 q34	chromosome 9 open reading frame 163 [Source:HGNC Symbol;Acc:HGNC:26718]
563	ENSG00000253661	ZFHX4-AS1	-0.787873	-0.260335	-2.56805	0.0150916	0.868319	0.815271	19 x 2	G	8 q21	ZFHX4 antisense RNA 1 [Source:HGNC Symbol;Acc:HGNC:44165]
564	ENSG00000160584	SIK3	-0.38556	-0.166707	-2.57281	0.0151091	0.868319	0.815329	6 x 8	H	11 q23	SIK family kinase 3 [Source:HGNC Symbol;Acc:HGNC:29165]
565	ENSG00000204956	PCDHGA1	-1.02859	-0.277132	-2.57955	0.0151229	0.868319	0.815374	28 x 22		5 q31	protocadherin gamma subfamily A, 1 [Source:HGNC Symbol;Acc:HGNC:8696]
566	ENSG00000159445	THEM4	-0.430034	-0.18109	-2.58957	0.0151329	0.868319	0.815407	5 x 32		1 q21	thioesterase superfamily member 4 [Source:HGNC Symbol;Acc:HGNC:17947]
567	ENSG00000161179	YDJC	0.647034	0.449068	2.57764	0.0151791	0.868319	0.815558	40 x 38		22 q11	YdjC chitooligosaccharide deacetylase homolog [Source:HGNC Symbol;Acc:HGNC:27158]
568	ENSG00000102743	SLC25A15	0.642209	0.444933	2.56255	0.0152038	0.868319	0.815639	27 x 18		13 q14	solute carrier family 25 member 15 [Source:HGNC Symbol;Acc:HGNC:10985]
569	ENSG00000224892		0.606171	0.41443	2.56071	0.0152067	0.868319	0.815648	10 x 31		13 q14	ribosomal protein S4X pseudogene 16 [Source:HGNC Symbol;Acc:HGNC:36365]
570	ENSG00000159322	ADPGK	0.427809	0.273151	2.56446	0.0152142	0.868319	0.815673	31 x 11		15 q24	ADP dependent glucokinase [Source:HGNC Symbol;Acc:HGNC:25250]
571	ENSG00000213931	HBE1	-0.573301	-0.220607	-2.60395	0.0152146	0.868319	0.815674	24 x 30		11 p15	hemoglobin subunit epsilon 1 [Source:HGNC Symbol;Acc:HGNC:4830]
572	ENSG00000178821	TMEM52	1.0156	0.799725	2.58031	0.0152237	0.868319	0.815703	40 x 35		1 p36	transmembrane protein 52 [Source:HGNC Symbol;Acc:HGNC:27916]
573	ENSG00000011275	RNF216	-0.465874	-0.191951	-2.56023	0.0152242	0.868319	0.815705	23 x 20		7 p22	ring finger protein 216 [Source:HGNC Symbol;Acc:HGNC:21698]
574	ENSG00000196458	ZNF605	-0.487428	-0.19817	-2.57328	0.0152385	0.868319	0.815751	3 x 20		12 q24	zinc finger protein 605 [Source:HGNC Symbol;Acc:HGNC:28068]
575	ENSG00000280425		0.418986	0.266581	2.56048	0.0152724	0.868319	0.815861	18 x 27		1 p32
576	ENSG00000153832	FBXO36	-0.722442	-0.250693	-2.56307	0.0152799	0.868319	0.815885	4 x 39		2 q36	F-box protein 36 [Source:HGNC Symbol;Acc:HGNC:27020]
577	ENSG00000165389	SPTSSA	0.499166	0.327737	2.55947	0.0152858	0.868319	0.815904	31 x 15		14 q13	serine palmitoyltransferase small subunit A [Source:HGNC Symbol;Acc:HGNC:20361]
578	ENSG00000165684	SNAPC4	0.41693	0.265055	2.56187	0.0152926	0.868319	0.815926	20 x 17		9 q34	small nuclear RNA activating complex polypeptide 4 [Source:HGNC Symbol;Acc:HGNC:11137]
579	ENSG00000180611	MB21D2	-0.662128	-0.239884	-2.55608	0.0153756	0.868319	0.816192	11 x 7		3 q29	Mab-21 domain containing 2 [Source:HGNC Symbol;Acc:HGNC:30438]
580	ENSG00000106460	TMEM106B	-0.523749	-0.208116	-2.55673	0.0153936	0.868319	0.816249	1 x 15	I	7 p21	transmembrane protein 106B [Source:HGNC Symbol;Acc:HGNC:22407]
581	ENSG00000262703		0.460846	0.298102	2.55512	0.0154109	0.868319	0.816304	16 x 19		16 p13
582	ENSG00000270210		-0.77051	-0.257988	-2.55683	0.0154359	0.868319	0.816384	13 x 31		2 p23
583	ENSG00000231830		0.450508	0.290235	2.55727	0.0154402	0.868319	0.816397	18 x 28		X q28
584	ENSG00000184208	C22orf46	-0.381998	-0.165512	-2.55396	0.0154728	0.868319	0.8165	17 x 20		22 q13	chromosome 22 open reading frame 46 [Source:HGNC Symbol;Acc:HGNC:26294]
585	ENSG00000116670	MAD2L2	0.642646	0.445308	2.5546	0.0154765	0.868319	0.816511	34 x 28		1 p36	mitotic arrest deficient 2 like 2 [Source:HGNC Symbol;Acc:HGNC:6764]
586	ENSG00000163293	NIPAL1	0.948295	0.730549	2.55367	0.0154793	0.868319	0.81652	39 x 20	C	4 p12	NIPA like domain containing 1 [Source:HGNC Symbol;Acc:HGNC:27194]
587	ENSG00000149923	PPP4C	0.434577	0.278218	2.55665	0.0154833	0.868319	0.816533	38 x 35		16 p11	protein phosphatase 4 catalytic subunit [Source:HGNC Symbol;Acc:HGNC:9319]
588	ENSG00000002822	MAD1L1	-0.511979	-0.204966	-2.55984	0.0154979	0.868319	0.816579	20 x 17		7 p22	MAD1 mitotic arrest deficient like 1 [Source:HGNC Symbol;Acc:HGNC:6762]
589	ENSG00000178397	FAM220A	-0.492526	-0.199606	-2.54915	0.0156331	0.868319	0.817	32 x 16		7 p22	family with sequence similarity 220 member A [Source:HGNC Symbol;Acc:HGNC:22422]
590	ENSG00000273249		0.460407	0.297768	2.54878	0.0156748	0.868319	0.817128	8 x 31		9 q34
591	ENSG00000167112	TRUB2	0.437293	0.280257	2.54704	0.0157113	0.868319	0.81724	19 x 40		9 q34	TruB pseudouridine synthase family member 2 [Source:HGNC Symbol;Acc:HGNC:17170]
592	ENSG00000253408	LOC101929897	0.249704	0.148163	2.56741	0.0157138	0.868319	0.817248	18 x 34		8 p11
593	ENSG00000139725	RHOF	-0.855763	-0.268046	-2.54711	0.0157173	0.868319	0.817259	37 x 11		12 q24	ras homolog family member F, filopodia associated [Source:HGNC Symbol;Acc:HGNC:15703]
594	ENSG00000171540	OTP	0.270607	0.161999	2.54795	0.0157196	0.868319	0.817266	24 x 34		5 q14	orthopedia homeobox [Source:HGNC Symbol;Acc:HGNC:8518]
595	ENSG00000280128		-0.645996	-0.23668	-2.55215	0.0157231	0.868319	0.817276	10 x 22		6 p22
596	ENSG00000272674	PCDHB16	-1.45634	-0.234522	-2.56251	0.0157703	0.868319	0.81742	7 x 3		5 q31	protocadherin beta 16 [Source:HGNC Symbol;Acc:HGNC:14546]
597	ENSG00000110844	PRPF40B	-0.446821	-0.186258	-2.56852	0.0158468	0.868319	0.817651	3 x 23		12 q13	pre-mRNA processing factor 40 homolog B [Source:HGNC Symbol;Acc:HGNC:25031]
598	ENSG00000171848	RRM2	0.732956	0.52466	2.56123	0.0158669	0.868319	0.817712	40 x 26	A	2 p25	ribonucleotide reductase regulatory subunit M2 [Source:HGNC Symbol;Acc:HGNC:10452]
599	ENSG00000204241	LOC100128239	0.605365	0.413755	2.56928	0.0159877	0.868319	0.818072	2 x 33		11 q25
600	ENSG00000171161	ZNF672	0.479646	0.312549	2.54679	0.015994	0.868319	0.818091	22 x 17		1 q44	zinc finger protein 672 [Source:HGNC Symbol;Acc:HGNC:26179]
601	ENSG00000164307	ERAP1	-0.532853	-0.210504	-2.54604	0.0160496	0.868319	0.818255	29 x 8		5 q15	endoplasmic reticulum aminopeptidase 1 [Source:HGNC Symbol;Acc:HGNC:18173]
602	ENSG00000119411	BSPRY	0.870288	0.65325	2.58405	0.0160664	0.868319	0.818304	13 x 38		9 q32	B-box and SPRY domain containing [Source:HGNC Symbol;Acc:HGNC:18232]
603	ENSG00000102794	ACOD1	0.382343	0.239717	2.5694	0.0161007	0.868319	0.818405	34 x 9		13 q22	aconitate decarboxylase 1 [Source:HGNC Symbol;Acc:HGNC:33904]
604	ENSG00000244165	P2RY11	0.511299	0.337276	2.53861	0.0161159	0.868319	0.818449	18 x 21		19 p13	purinergic receptor P2Y11 [Source:HGNC Symbol;Acc:HGNC:8540]
605	ENSG00000123416	TUBA1B	0.433451	0.277373	2.54087	0.0161536	0.868319	0.818559	39 x 28	A	12 q13	tubulin alpha 1b [Source:HGNC Symbol;Acc:HGNC:18809]
606	ENSG00000229390		-0.28962	-0.132266	-2.57109	0.0161789	0.868319	0.818632	11 x 12		6 p22	MHC class I polypeptide-related sequence D (pseudogene) [Source:HGNC Symbol;Acc:HGNC:7093]
607	ENSG00000118971	CCND2	-1.12765	-0.275515	-2.61462	0.016212	0.868319	0.818728	9 x 2		12 p13	cyclin D2 [Source:HGNC Symbol;Acc:HGNC:1583]
608	ENSG00000183682	BMP8A	0.611901	0.419236	2.54814	0.0162335	0.868319	0.81879	2 x 7	H	1 p34	bone morphogenetic protein 8a [Source:HGNC Symbol;Acc:HGNC:21650]
609	ENSG00000164438	TLX3	1.02067	0.805022	2.6071	0.0162669	0.868319	0.818885	38 x 22	C	5 q35	T-cell leukemia homeobox 3 [Source:HGNC Symbol;Acc:HGNC:13532]
610	ENSG00000255050		0.493677	0.323447	2.53269	0.0163208	0.868319	0.819039	10 x 25		8 q24
611	ENSG00000279778		-1.476	-0.230335	-2.64303	0.016335	0.868319	0.81908	22 x 25		1 p22
612	ENSG00000156860	FBRS	0.284196	0.171113	2.54453	0.0163519	0.868319	0.819128	20 x 16		16 p11	fibrosin [Source:HGNC Symbol;Acc:HGNC:20442]
613	ENSG00000238280		0.303067	0.183925	2.53412	0.0163677	0.868319	0.819173	22 x 35		10 q21
614	ENSG00000146576	C7orf26	-0.45442	-0.188551	-2.53228	0.0163975	0.868319	0.819257	20 x 19		7 p22	chromosome 7 open reading frame 26 [Source:HGNC Symbol;Acc:HGNC:21702]
615	ENSG00000135919	SERPINE2	-1.21272	-0.270157	-2.55043	0.0164077	0.868319	0.819286	12 x 4		2 q36	serpin family E member 2 [Source:HGNC Symbol;Acc:HGNC:8951]
616	ENSG00000177917	ARL6IP6	0.631094	0.435455	2.55914	0.0164132	0.868319	0.819301	31 x 19		2 q23	ADP ribosylation factor like GTPase 6 interacting protein 6 [Source:HGNC Symbol;Acc:HGNC:24048]
617	ENSG00000198707	CEP290	-0.463328	-0.191201	-2.5352	0.016422	0.868319	0.819326	2 x 20		12 q21	centrosomal protein 290 [Source:HGNC Symbol;Acc:HGNC:29021]
618	ENSG00000198626	RYR2	-1.20978	-0.270404	-2.54883	0.0164899	0.868319	0.819517	9 x 4		1 q43	ryanodine receptor 2 [Source:HGNC Symbol;Acc:HGNC:10484]
619	ENSG00000235720		0.318174	0.19431	2.55932	0.0165136	0.868319	0.819583	8 x 12		7 q11	GA binding protein transcription factor alpha subunit pseudogene [Source:HGNC Symbol;Acc:HGNC:4072]
620	ENSG00000198088	NUP62CL	0.90718	0.689423	2.54171	0.0165487	0.868319	0.81968	3 x 38		X q22	nucleoporin 62 C-terminal like [Source:HGNC Symbol;Acc:HGNC:25960]
621	ENSG00000255727	LINC01489	-0.700686	-0.247007	-2.5466	0.0165808	0.868319	0.819769	7 x 35		12 p12	long intergenic non-protein coding RNA 1489 [Source:HGNC Symbol;Acc:HGNC:51145]
622	ENSG00000197635	DPP4	-1.01189	-0.276915	-2.52731	0.0166063	0.868319	0.81984	19 x 1	G	2 q24	dipeptidyl peptidase 4 [Source:HGNC Symbol;Acc:HGNC:3009]
623	ENSG00000272551		-0.67297	-0.241963	-2.52372	0.0166169	0.868319	0.819869	12 x 34		2 q31
624	ENSG00000091972	CD200	-1.13504	-0.275195	-2.52529	0.0166243	0.868319	0.819889	10 x 3		3 q13	CD200 molecule [Source:HGNC Symbol;Acc:HGNC:7203]
625	ENSG00000160145	KALRN	-0.790983	-0.260739	-2.52562	0.01663	0.868319	0.819905	29 x 24		3 q21	kalirin RhoGEF kinase [Source:HGNC Symbol;Acc:HGNC:4814]
626	ENSG00000265458		0.485128	0.316794	2.53188	0.0166619	0.868319	0.819992	19 x 36		17 q25
627	ENSG00000198585	NUDT16	-0.321052	-0.144063	-2.523	0.0166871	0.868319	0.820061	11 x 35		3 q22	nudix hydrolase 16 [Source:HGNC Symbol;Acc:HGNC:26442]
628	ENSG00000214190		0.256656	0.15274	2.52161	0.0167004	0.868319	0.820097	14 x 14		9 p24	ring finger protein 152 pseudogene 1 [Source:HGNC Symbol;Acc:HGNC:49743]
629	ENSG00000198805	PNP	0.646658	0.448745	2.53432	0.016719	0.868319	0.820148	40 x 30	A	14 q11	purine nucleoside phosphorylase [Source:HGNC Symbol;Acc:HGNC:7892]
630	ENSG00000109775	UFSP2	-0.428391	-0.180576	-2.52467	0.0167256	0.868319	0.820166	19 x 36		4 q35	UFM1 specific peptidase 2 [Source:HGNC Symbol;Acc:HGNC:25640]
631	ENSG00000100764	PSMC1	0.397956	0.25108	2.5352	0.0167326	0.868319	0.820185	28 x 14		14 q32	proteasome 26S subunit, ATPase 1 [Source:HGNC Symbol;Acc:HGNC:9547]
632	ENSG00000272088		0.431913	0.27622	2.53352	0.0167902	0.868319	0.820341	16 x 26		1 p36
633	ENSG00000101773	RBBP8	0.605821	0.414138	2.51804	0.0168988	0.868319	0.820633	1 x 16	I	18 q11	RB binding protein 8, endonuclease [Source:HGNC Symbol;Acc:HGNC:9891]
634	ENSG00000158987	RAPGEF6	-0.342474	-0.151817	-2.51535	0.0169416	0.868319	0.820747	12 x 34		5 q31	Rap guanine nucleotide exchange factor 6 [Source:HGNC Symbol;Acc:HGNC:20655]
635	ENSG00000275389		-0.377989	-0.164159	-2.52992	0.0169568	0.868319	0.820787	21 x 32		12 q24
636	ENSG00000076067	RBMS2	-0.494014	-0.200023	-2.51476	0.0169769	0.868319	0.82084	8 x 7		12 q13	RNA binding motif single stranded interacting protein 2 [Source:HGNC Symbol;Acc:HGNC:9909]
637	ENSG00000187446	CHP1	-0.53194	-0.210267	-2.51309	0.0170317	0.868319	0.820984	26 x 10		15 q15	calcineurin like EF-hand protein 1 [Source:HGNC Symbol;Acc:HGNC:17433]
638	ENSG00000146909	NOM1	0.445132	0.286166	2.53193	0.0170414	0.868319	0.82101	27 x 18		7 q36	nucleolar protein with MIF4G domain 1 [Source:HGNC Symbol;Acc:HGNC:13244]
639	ENSG00000276566		-1.0053	-0.27679	-2.5731	0.0170461	0.868319	0.821022	40 x 1	E	2 p11	immunoglobulin kappa variable 1D-13 [Source:HGNC Symbol;Acc:HGNC:5747]
640	ENSG00000167646	DNAAF3	0.914079	0.696263	2.53903	0.017047	0.868319	0.821024	1 x 40		19 q13	dynein axonemal assembly factor 3 [Source:HGNC Symbol;Acc:HGNC:30492]
641	ENSG00000088808	PPP1R13B	0.494892	0.324395	2.52193	0.0171065	0.868319	0.82118	18 x 17		14 q32	protein phosphatase 1 regulatory subunit 13B [Source:HGNC Symbol;Acc:HGNC:14950]
642	ENSG00000167393	PPP2R3B	0.68679	0.483579	2.52865	0.0171185	0.868319	0.821211	32 x 32		X p22	protein phosphatase 2 regulatory subunit B''beta [Source:HGNC Symbol;Acc:HGNC:13417]
643	ENSG00000227674	LINC00355	-0.895821	-0.271499	-2.63395	0.0171418	0.868319	0.821272	26 x 31		13 q21	long intergenic non-protein coding RNA 355 [Source:HGNC Symbol;Acc:HGNC:27061]
644	ENSG00000274209	ANTXRL	1.31147	1.13103	2.51031	0.0171457	0.868319	0.821282	40 x 21	C	10 q11	anthrax toxin receptor like [Source:HGNC Symbol;Acc:HGNC:27277]
645	ENSG00000244503		0.283529	0.170664	2.51505	0.0171829	0.868319	0.821378	24 x 37		3 q25
646	ENSG00000198580		-0.614236	-0.229987	-2.52491	0.0171866	0.868319	0.821388	27 x 22		7 p22
647	ENSG00000230733		-0.686054	-0.244392	-2.52028	0.0172017	0.868319	0.821427	21 x 19		7 p22
648	ENSG00000278768		-0.517638	-0.206489	-2.52928	0.017272	0.868319	0.821607	12 x 28		11 q23	BACE1 antisense RNA [Source:HGNC Symbol;Acc:HGNC:37125]
649	ENSG00000145824	CXCL14	-1.7576	-0.148858	-2.50654	0.0173067	0.868319	0.821696	19 x 1	G	5 q31	C-X-C motif chemokine ligand 14 [Source:HGNC Symbol;Acc:HGNC:10640]
650	ENSG00000249238		-0.32551	-0.145696	-2.58324	0.0173102	0.868319	0.821705	21 x 33		5 q13	B-cell CLL/lymphoma 9 pseudogene 1 [Source:HGNC Symbol;Acc:HGNC:51328]
651	ENSG00000143545	RAB13	-0.359272	-0.157734	-2.51395	0.01742	0.868319	0.821983	35 x 35		1 q21	RAB13, member RAS oncogene family [Source:HGNC Symbol;Acc:HGNC:9762]
652	ENSG00000176248	ANAPC2	0.386675	0.242857	2.50366	0.0174259	0.868319	0.821998	20 x 15		9 q34	anaphase promoting complex subunit 2 [Source:HGNC Symbol;Acc:HGNC:19989]
653	ENSG00000132646	PCNA	0.628982	0.433662	2.50841	0.0174398	0.868319	0.822033	39 x 28	A	20 p12	proliferating cell nuclear antigen [Source:HGNC Symbol;Acc:HGNC:8729]
654	ENSG00000259408	LOC101929988	-0.457043	-0.189335	-2.52504	0.017458	0.868319	0.822079	12 x 25		15 q14
655	ENSG00000256913		0.304281	0.184755	2.51841	0.0174615	0.868319	0.822087	9 x 11		12 p13
656	ENSG00000153936	HS2ST1	-0.372372	-0.162249	-2.53614	0.0174627	0.868319	0.822091	30 x 18		1 p22	heparan sulfate 2-O-sulfotransferase 1 [Source:HGNC Symbol;Acc:HGNC:5193]
657	ENSG00000257252		-0.476519	-0.195052	-2.52155	0.0174771	0.868319	0.822127	21 x 32		12 q22
658	ENSG00000140153	WDR20	0.458605	0.296393	2.50269	0.0174966	0.868319	0.822175	16 x 37		14 q32	WD repeat domain 20 [Source:HGNC Symbol;Acc:HGNC:19667]
659	ENSG00000183921		0.550081	0.368264	2.53936	0.0175033	0.868319	0.822192	4 x 30		16 p12	short chain dehydrogenase/reductase family 42E, member 2 [Source:HGNC Symbol;Acc:HGNC:35414]
660	ENSG00000128165	ADM2	-0.9929	-0.276496	-2.501	0.0175525	0.868319	0.822314	40 x 21	C	22 q13	adrenomedullin 2 [Source:HGNC Symbol;Acc:HGNC:28898]
661	ENSG00000227512		0.412096	0.261477	2.50231	0.0176074	0.868319	0.82245	16 x 19		9 q34
662	ENSG00000081377	CDC14B	-0.434568	-0.1825	-2.4976	0.0176804	0.868319	0.82263	9 x 7		9 q22	cell division cycle 14B [Source:HGNC Symbol;Acc:HGNC:1719]
663	ENSG00000160957	RECQL4	0.821611	0.606579	2.50447	0.0176827	0.868319	0.822635	40 x 27	A	8 q24	RecQ like helicase 4 [Source:HGNC Symbol;Acc:HGNC:9949]
664	ENSG00000224078		-1.12372	-0.275674	-2.51512	0.0176843	0.868319	0.822639	4 x 3	H	15 q11	small nucleolar RNA host gene 14 [Source:HGNC Symbol;Acc:HGNC:37462]
665	ENSG00000240707	LINC01168	0.574819	0.388429	2.49716	0.017686	0.868319	0.822643	15 x 35		10 q26	long intergenic non-protein coding RNA 1168 [Source:HGNC Symbol;Acc:HGNC:49537]
666	ENSG00000170892	TSEN34	0.527746	0.350324	2.50463	0.0177426	0.868319	0.822781	40 x 35		19 q13	tRNA splicing endonuclease subunit 34 [Source:HGNC Symbol;Acc:HGNC:15506]
667	ENSG00000261069		-0.76405	-0.257076	-2.49818	0.0177773	0.868319	0.822866	5 x 5	H	15 q11
668	ENSG00000003096	KLHL13	0.902186	0.684486	2.52436	0.0179781	0.868319	0.823347	11 x 1		X q24	kelch like family member 13 [Source:HGNC Symbol;Acc:HGNC:22931]
669	ENSG00000164889	SLC4A2	0.559064	0.375551	2.5057	0.0179922	0.868319	0.82338	22 x 16		7 q36	solute carrier family 4 member 2 [Source:HGNC Symbol;Acc:HGNC:11028]
670	ENSG00000146918	NCAPG2	0.597194	0.406934	2.5053	0.0179967	0.868319	0.823391	39 x 26	A	7 q36	non-SMC condensin II complex subunit G2 [Source:HGNC Symbol;Acc:HGNC:21904]
671	ENSG00000235897	TM4SF19-AS1	0.466737	0.30261	2.50222	0.0180282	0.868319	0.823466	10 x 31		3 q29	TM4SF19 antisense RNA 1 [Source:HGNC Symbol;Acc:HGNC:41085]
672	ENSG00000164244	PRRC1	-0.389823	-0.168129	-2.50565	0.0180367	0.868319	0.823486	1 x 12	I	5 q23	proline rich coiled-coil 1 [Source:HGNC Symbol;Acc:HGNC:28164]
673	ENSG00000174586	ZNF497	0.578352	0.391333	2.51719	0.0180685	0.868319	0.82356	2 x 24		19 q13	zinc finger protein 497 [Source:HGNC Symbol;Acc:HGNC:23714]
674	ENSG00000077152	UBE2T	0.502219	0.33013	2.48884	0.018071	0.868319	0.823566	40 x 27	A	1 q32	ubiquitin conjugating enzyme E2 T [Source:HGNC Symbol;Acc:HGNC:25009]
675	ENSG00000272265		-0.343487	-0.152178	-2.48837	0.0180852	0.868319	0.8236	11 x 30		5 q23
676	ENSG00000151150	ANK3	-0.567185	-0.219133	-2.50049	0.0181108	0.868319	0.82366	6 x 7	H	10 q21	ankyrin 3 [Source:HGNC Symbol;Acc:HGNC:494]
677	ENSG00000132881	RSG1	0.507286	0.334112	2.50221	0.0181751	0.868319	0.82381	22 x 14		1 p36	REM2 and RAB like small GTPase 1 [Source:HGNC Symbol;Acc:HGNC:28127]
678	ENSG00000116062	MSH6	0.416643	0.264843	2.49889	0.0181823	0.868319	0.823826	28 x 20		2 p16	mutS homolog 6 [Source:HGNC Symbol;Acc:HGNC:7329]
679	ENSG00000101350	KIF3B	-0.423857	-0.179152	-2.48503	0.0182042	0.868319	0.823877	3 x 11	I	20 q11	kinesin family member 3B [Source:HGNC Symbol;Acc:HGNC:6320]
680	ENSG00000254180		-0.256556	-0.119316	-2.49056	0.0182142	0.868319	0.8239	15 x 14		8 q21
681	ENSG00000251003		-1.28691	-0.262491	-2.49762	0.0182168	0.868319	0.823906	24 x 32		8 q23	ZFPM2 antisense RNA 1 [Source:HGNC Symbol;Acc:HGNC:50698]
682	ENSG00000166272	WBP1L	-0.488496	-0.198472	-2.48563	0.0182189	0.868319	0.823911	4 x 4	H	10 q24	WW domain binding protein 1 like [Source:HGNC Symbol;Acc:HGNC:23510]
683	ENSG00000261229		0.343459	0.211953	2.48423	0.0182642	0.868319	0.824016	9 x 35		15 q25
684	ENSG00000226054		0.402352	0.254301	2.48712	0.018305	0.868319	0.824109	32 x 17		21 q22	mediator of cell motility 1 pseudogene 1 [Source:HGNC Symbol;Acc:HGNC:23274]
685	ENSG00000169689	CENPX	0.702961	0.497846	2.48132	0.0183835	0.868319	0.824289	38 x 38		17 q25	centromere protein X [Source:HGNC Symbol;Acc:HGNC:11422]
686	ENSG00000254748		0.253313	0.150536	2.48094	0.0183984	0.868319	0.824322	17 x 33		11 q14	heterogeneous nuclear ribonucleoprotein C pseudogene 8 [Source:HGNC Symbol;Acc:HGNC:48819]
687	ENSG00000135722	FBXL8	0.57071	0.385057	2.48069	0.0183993	0.868319	0.824324	7 x 29		16 q22	F-box and leucine rich repeat protein 8 [Source:HGNC Symbol;Acc:HGNC:17875]
688	ENSG00000007933	FMO3	-0.955684	-0.275145	-2.48185	0.0184207	0.868319	0.824373	28 x 3		1 q24	flavin containing monooxygenase 3 [Source:HGNC Symbol;Acc:HGNC:3771]
689	ENSG00000164327	RICTOR	-0.300104	-0.136257	-2.48139	0.0184338	0.868319	0.824403	4 x 15		5 p13	RPTOR independent companion of MTOR complex 2 [Source:HGNC Symbol;Acc:HGNC:28611]
690	ENSG00000227467	LINC01537	-0.397893	-0.170796	-2.50387	0.0184352	0.868319	0.824406	15 x 8		11 q13	long intergenic non-protein coding RNA 1537 [Source:HGNC Symbol;Acc:HGNC:51301]
691	ENSG00000185527	PDE6G	-1.30204	-0.260584	-2.56382	0.0184476	0.868319	0.824434	35 x 5		17 q25	phosphodiesterase 6G [Source:HGNC Symbol;Acc:HGNC:8789]
692	ENSG00000278921	EPB41L4A-AS2	-0.57796	-0.221717	-2.48658	0.0184592	0.868319	0.82446	14 x 37		5 q22	EPB41L4A antisense RNA 2 (head to head) [Source:HGNC Symbol;Acc:HGNC:25643]
693	ENSG00000139637	C12orf10	-0.397898	-0.170797	-2.48358	0.0184695	0.868319	0.824483	35 x 38		12 q13	chromosome 12 open reading frame 10 [Source:HGNC Symbol;Acc:HGNC:17590]
694	ENSG00000254670	LOC105376557	-0.902873	-0.272023	-2.47907	0.0185042	0.868319	0.824561	1 x 21		11 p15
695	ENSG00000236540		0.533962	0.355292	2.482	0.018508	0.868319	0.82457	12 x 23		22 q11
696	ENSG00000227436		-0.234848	-0.110512	-2.4799	0.018514	0.868319	0.824583	11 x 14		7 p15	FCF1 pseudogene 1 [Source:HGNC Symbol;Acc:HGNC:44613]
697	ENSG00000232403		-0.310111	-0.140014	-2.49295	0.0185166	0.868319	0.824589	18 x 29		2 p15
698	ENSG00000156853	ZNF689	0.497492	0.326427	2.52846	0.0185192	0.868319	0.824595	1 x 8	H	16 p11	zinc finger protein 689 [Source:HGNC Symbol;Acc:HGNC:25173]
699	ENSG00000276408		0.546979	0.365757	2.48839	0.0185513	0.868319	0.824667	19 x 27		16 q23
700	ENSG00000261334		0.443695	0.28508	2.48429	0.0185713	0.868319	0.824711	15 x 17		9 q34
701	ENSG00000131370	SH3BP5	-0.665155	-0.24047	-2.47627	0.0186114	0.868319	0.824801	7 x 7	H	3 p25	SH3 domain binding protein 5 [Source:HGNC Symbol;Acc:HGNC:10827]
702	ENSG00000157212	PAXIP1	0.466783	0.302645	2.49571	0.0186292	0.868319	0.82484	6 x 14		7 q36	PAX interacting protein 1 [Source:HGNC Symbol;Acc:HGNC:8624]
703	ENSG00000140577	CRTC3	0.4281	0.273368	2.49037	0.0186749	0.868319	0.824941	7 x 10		15 q26	CREB regulated transcription coactivator 3 [Source:HGNC Symbol;Acc:HGNC:26148]
704	ENSG00000273342		0.328459	0.201448	2.47413	0.0187034	0.868319	0.825004	16 x 14		22 q11
705	ENSG00000236307		0.417115	0.265193	2.49788	0.0187286	0.868319	0.825059	34 x 31		2 q13	eukaryotic translation elongation factor 1 epsilon 1 pseudogene 1 [Source:HGNC Symbol;Acc:HGNC:51459]
706	ENSG00000253024		0.303382	0.18414	2.48032	0.0187533	0.868319	0.825114	16 x 18		11 q13	RNA, U6 small nuclear 1238, pseudogene [Source:HGNC Symbol;Acc:HGNC:48201]
707	ENSG00000228413		0.253108	0.150401	2.47615	0.0187661	0.868319	0.825142	16 x 18		3 q29
708	ENSG00000273297		0.611386	0.418804	2.47095	0.01883	0.868319	0.825281	32 x 28		7 q33
709	ENSG00000261468		-0.397641	-0.170713	-2.49614	0.0188447	0.868319	0.825313	14 x 6		3 p24
710	ENSG00000104755	ADAM2	0.180356	0.103846	2.49853	0.0188485	0.868319	0.825321	25 x 33		8 p11	ADAM metallopeptidase domain 2 [Source:HGNC Symbol;Acc:HGNC:198]
711	ENSG00000189043	NDUFA4	-0.530848	-0.209982	-2.47758	0.0188612	0.868319	0.825348	36 x 37		7 p21	NDUFA4, mitochondrial complex associated [Source:HGNC Symbol;Acc:HGNC:7687]
712	ENSG00000111371	SLC38A1	-0.523298	-0.207997	-2.47224	0.0188716	0.868319	0.825371	1 x 12	I	12 q13	solute carrier family 38 member 1 [Source:HGNC Symbol;Acc:HGNC:13447]
713	ENSG00000235034	C19orf81	0.767654	0.556247	2.47055	0.0188758	0.868319	0.82538	28 x 35		19 q13	chromosome 19 open reading frame 81 [Source:HGNC Symbol;Acc:HGNC:40041]
714	ENSG00000060140	STYK1	0.79263	0.579361	2.46998	0.0188826	0.868319	0.825395	36 x 19		12 p13	serine/threonine/tyrosine kinase 1 [Source:HGNC Symbol;Acc:HGNC:18889]
715	ENSG00000203523		-0.382829	-0.165791	-2.47772	0.0188972	0.868319	0.825426	24 x 33		7 p21	taste 2 receptor member 2 pseudogene [Source:HGNC Symbol;Acc:HGNC:20615]
716	ENSG00000123243	ITIH5	-1.21135	-0.270272	-2.47528	0.0189069	0.868319	0.825447	14 x 1		10 p14	inter-alpha-trypsin inhibitor heavy chain family member 5 [Source:HGNC Symbol;Acc:HGNC:21449]
717	ENSG00000272732		-0.583977	-0.223135	-2.49506	0.0189467	0.868319	0.825533	10 x 34		7 p21
718	ENSG00000044115	CTNNA1	-0.419763	-0.177857	-2.47328	0.0190001	0.868319	0.825647	25 x 11		5 q31	catenin alpha 1 [Source:HGNC Symbol;Acc:HGNC:2509]
719	ENSG00000152910	CNTNAP4	-0.6375	-0.23494	-2.57753	0.0190855	0.868319	0.825829	25 x 30		16 q23	contactin associated protein like 4 [Source:HGNC Symbol;Acc:HGNC:18747]
720	ENSG00000135931	ARMC9	-0.410275	-0.174824	-2.46797	0.0191077	0.868319	0.825876	5 x 3		2 q37	armadillo repeat containing 9 [Source:HGNC Symbol;Acc:HGNC:20730]
721	ENSG00000215126	CBWD2	0.476984	0.310492	2.46689	0.0191688	0.868319	0.826004	11 x 28		9 p11	COBW domain containing 6 [Source:HGNC Symbol;Acc:HGNC:31978]
722	ENSG00000069702	TGFBR3	-0.672238	-0.241824	-2.47037	0.0192554	0.868319	0.826185	1 x 22		1 p22	transforming growth factor beta receptor 3 [Source:HGNC Symbol;Acc:HGNC:11774]
723	ENSG00000153827	TRIP12	-0.359061	-0.157661	-2.46075	0.0192671	0.868319	0.82621	4 x 10		2 q36	thyroid hormone receptor interactor 12 [Source:HGNC Symbol;Acc:HGNC:12306]
724	ENSG00000139921	TMX1	0.433581	0.27747	2.47819	0.0192764	0.868319	0.826229	30 x 14		14 q22	thioredoxin related transmembrane protein 1 [Source:HGNC Symbol;Acc:HGNC:15487]
725	ENSG00000148110	MFSD14B	0.408504	0.258826	2.4627	0.0192828	0.868319	0.826242	31 x 14		9 q22	major facilitator superfamily domain containing 14B [Source:HGNC Symbol;Acc:HGNC:23376]
726	ENSG00000226415		0.617875	0.424264	2.46479	0.0193309	0.868319	0.826342	37 x 30		1 p31	triosephosphate isomerase 1 pseudogene 1 [Source:HGNC Symbol;Acc:HGNC:35449]
727	ENSG00000187762		-0.274175	-0.126286	-2.4634	0.0194185	0.868319	0.826522	14 x 15		6 p21	heat shock protein family E (Hsp10) member 1 pseudogene 11 [Source:HGNC Symbol;Acc:HGNC:49330]
728	ENSG00000258469		0.467959	0.303547	2.46267	0.0194272	0.868319	0.82654	15 x 26		14 q22	charged multivesicular body protein 4B pseudogene 1 [Source:HGNC Symbol;Acc:HGNC:43616]
729	ENSG00000272755		-0.332056	-0.148075	-2.46859	0.0194627	0.868319	0.826613	14 x 32		1 q21
730	ENSG00000183889	NPIPA5	0.507846	0.334554	2.46947	0.0194629	0.868319	0.826613	7 x 24		16 p13	nuclear pore complex-interacting protein family member A5 isoform 2 [Source:RefSeq peptide;Acc:NP_001338129]
731	ENSG00000183826	BTBD9	-0.468872	-0.19283	-2.48115	0.0194678	0.868319	0.826623	3 x 7	H	6 p21	BTB domain containing 9 [Source:HGNC Symbol;Acc:HGNC:21228]
732	ENSG00000176978	DPP7	0.790252	0.577147	2.45628	0.0194726	0.868319	0.826633	40 x 37		9 q34	dipeptidyl peptidase 7 [Source:HGNC Symbol;Acc:HGNC:14892]
733	ENSG00000146963	LUC7L2	0.300209	0.181972	2.46542	0.0194879	0.868319	0.826664	16 x 29		7 q34	LUC7 like 2, pre-mRNA splicing factor [Source:HGNC Symbol;Acc:HGNC:21608]
734	ENSG00000100345	MYH9	-0.414111	-0.176056	-2.45643	0.0194881	0.868319	0.826665	24 x 7		22 q12	myosin heavy chain 9 [Source:HGNC Symbol;Acc:HGNC:7579]
735	ENSG00000266963		0.370848	0.231429	2.48637	0.0194903	0.868319	0.826669	17 x 16		19 q13
736	ENSG00000197479	PCDHB11	-1.57916	-0.205153	-2.4582	0.0194983	0.868319	0.826685	7 x 1		5 q31	protocadherin beta 11 [Source:HGNC Symbol;Acc:HGNC:8682]
737	ENSG00000183853	KIRREL1	-0.752212	-0.255349	-2.47284	0.0195259	0.868319	0.826741	8 x 3		1 q23	kirre like nephrin family adhesion molecule 1 [Source:HGNC Symbol;Acc:HGNC:15734]
738	ENSG00000102387	TAF7L	0.581391	0.393838	2.46016	0.0195275	0.868319	0.826745	16 x 23		X q22	TATA-box binding protein associated factor 7 like [Source:HGNC Symbol;Acc:HGNC:11548]
739	ENSG00000267024		0.325959	0.199708	2.45497	0.0195311	0.868319	0.826752	30 x 34		19 q13
740	ENSG00000259129	LINC00648	-1.82812	-0.122162	-2.49629	0.0196183	0.868319	0.826928	26 x 30		14 q21	long intergenic non-protein coding RNA 648 [Source:HGNC Symbol;Acc:HGNC:44302]
741	ENSG00000188566	NDOR1	0.444716	0.285851	2.49215	0.019628	0.868319	0.826947	20 x 16		9 q34	NADPH dependent diflavin oxidoreductase 1 [Source:HGNC Symbol;Acc:HGNC:29838]
742	ENSG00000063244	U2AF2	0.362915	0.225749	2.47336	0.0196464	0.868319	0.826984	19 x 17		19 q13	U2 small nuclear RNA auxiliary factor 2 [Source:HGNC Symbol;Acc:HGNC:23156]
743	ENSG00000125249	RAP2A	-0.471822	-0.193691	-2.4835	0.0196766	0.868319	0.827045	31 x 21		13 q32	RAP2A, member of RAS oncogene family [Source:HGNC Symbol;Acc:HGNC:9861]
744	ENSG00000107957	SH3PXD2A	-0.870865	-0.269443	-2.47551	0.0196826	0.868319	0.827057	20 x 4		10 q24	SH3 and PX domains 2A [Source:HGNC Symbol;Acc:HGNC:23664]
745	ENSG00000204859	ZBTB48	0.437013	0.280046	2.4583	0.0197073	0.868319	0.827106	19 x 18		1 p36	zinc finger and BTB domain containing 48 [Source:HGNC Symbol;Acc:HGNC:4930]
746	ENSG00000136840	ST6GALNAC4	0.667457	0.466697	2.46827	0.0197221	0.868319	0.827135	40 x 36		9 q34	ST6 N-acetylgalactosaminide alpha-2,6-sialyltransferase 4 [Source:HGNC Symbol;Acc:HGNC:17846]
747	ENSG00000188735	TMEM120B	-0.498262	-0.201206	-2.45349	0.0197698	0.868319	0.82723	19 x 19		12 q24	transmembrane protein 120B [Source:HGNC Symbol;Acc:HGNC:32008]
748	ENSG00000281189	GHET1	0.514137	0.339517	2.45147	0.0197734	0.868319	0.827237	27 x 17		7 q36	gastric carcinoma proliferation enhancing transcript 1 [Source:HGNC Symbol;Acc:HGNC:49425]
749	ENSG00000163950	SLBP	0.491561	0.321797	2.46223	0.0197903	0.868319	0.82727	38 x 30		4 p16	stem-loop binding protein [Source:HGNC Symbol;Acc:HGNC:10904]
750	ENSG00000225871		-0.460153	-0.190261	-2.46098	0.0198065	0.868319	0.827302	5 x 21		1 q21
751	ENSG00000113583	C5orf15	-0.386746	-0.167104	-2.46563	0.0198293	0.868319	0.827347	1 x 15	I	5 q31	chromosome 5 open reading frame 15 [Source:HGNC Symbol;Acc:HGNC:20656]
752	ENSG00000226149		-0.298167	-0.135523	-2.46017	0.0198313	0.868319	0.827351	13 x 14		6 q22
753	ENSG00000255159		-0.282669	-0.129589	-2.46596	0.0198552	0.868319	0.827398	13 x 20		11 p15
754	ENSG00000204599	TRIM39	-0.328142	-0.146655	-2.44817	0.0198912	0.868319	0.827469	18 x 30		6 p22	tripartite motif containing 39 [Source:HGNC Symbol;Acc:HGNC:10065]
755	ENSG00000259804		0.329606	0.202247	2.45388	0.0199136	0.868319	0.827513	18 x 29		16 q22
756	ENSG00000218586		0.257172	0.153081	2.45258	0.0199141	0.868319	0.827514	7 x 12		7 p11
757	ENSG00000120328	PCDHB12	-1.10212	-0.276407	-2.47924	0.0199804	0.868319	0.827643	7 x 2		5 q31	protocadherin beta 12 [Source:HGNC Symbol;Acc:HGNC:8683]
758	ENSG00000127191	TRAF2	0.473333	0.307677	2.44975	0.0199843	0.868319	0.82765	20 x 16		9 q34	TNF receptor associated factor 2 [Source:HGNC Symbol;Acc:HGNC:12032]
759	ENSG00000152932	RAB3C	-0.619001	-0.231024	-2.47206	0.0200272	0.868319	0.827733	14 x 1		5 q11	RAB3C, member RAS oncogene family [Source:HGNC Symbol;Acc:HGNC:30269]
760	ENSG00000225285		0.769851	0.558267	2.44389	0.0200719	0.868319	0.82782	31 x 35		1 p36	long intergenic non-protein coding RNA 1770 [Source:HGNC Symbol;Acc:HGNC:52560]
761	ENSG00000156113	KCNMA1	-1.06669	-0.277099	-2.4566	0.0201003	0.868319	0.827874	4 x 4	H	10 q22	potassium calcium-activated channel subfamily M alpha 1 [Source:HGNC Symbol;Acc:HGNC:6284]
762	ENSG00000239969		0.430156	0.274905	2.44818	0.0201361	0.868319	0.827943	16 x 27		7 q22
763	ENSG00000230870		0.556746	0.373666	2.45785	0.020219	0.868319	0.828101	4 x 21		21 q22	F-box and WD repeat domain containing 11 pseudogene 1 [Source:HGNC Symbol;Acc:HGNC:1145]
764	ENSG00000263884		0.583174	0.395309	2.44822	0.0202327	0.868319	0.828127	10 x 29		18 p11
765	ENSG00000223901		-0.365595	-0.159924	-2.44167	0.0202456	0.868319	0.828151	7 x 21		21 q22
766	ENSG00000170373	CST1	1.46196	1.31656	2.44195	0.0202744	0.868319	0.828205	6 x 40	K	20 p11	cystatin SN [Source:HGNC Symbol;Acc:HGNC:2473]
767	ENSG00000143515	ATP8B2	-0.755241	-0.255798	-2.44988	0.0202986	0.868319	0.828251	6 x 1		1 q21	ATPase phospholipid transporting 8B2 [Source:HGNC Symbol;Acc:HGNC:13534]
768	ENSG00000235376	RPEL1	0.236437	0.139496	2.43874	0.020328	0.868319	0.828306	24 x 36		10 q24	ribulose-5-phosphate-3-epimerase like 1 [Source:HGNC Symbol;Acc:HGNC:45241]
769	ENSG00000253741	LOC100288181	0.986844	0.769886	2.44215	0.020349	0.868319	0.828346	27 x 14		8 q24
770	ENSG00000236846		0.479027	0.31207	2.43924	0.0203592	0.868319	0.828365	33 x 13		1 q41
771	ENSG00000267130		0.40318	0.254909	2.44519	0.0204018	0.868319	0.828444	19 x 31		19 q13
772	ENSG00000230067		0.353865	0.219308	2.43655	0.0204107	0.868319	0.828461	32 x 18		3 p22	heat shock protein family D (Hsp60) member 1 pseudogene 6 [Source:HGNC Symbol;Acc:HGNC:5267]
773	ENSG00000223566		-0.326512	-0.146062	-2.43611	0.0204142	0.868319	0.828468	16 x 13		7 q11	trinucleotide repeat containing 18 pseudogene 2 [Source:HGNC Symbol;Acc:HGNC:34014]
774	ENSG00000175984	DENND2C	-0.538946	-0.212079	-2.44399	0.0204144	0.868319	0.828468	14 x 6		1 p13	DENN domain containing 2C [Source:HGNC Symbol;Acc:HGNC:24748]
775	ENSG00000196517	SLC6A9	-0.686562	-0.244485	-2.43494	0.0205112	0.868319	0.828647	22 x 20		1 p34	solute carrier family 6 member 9 [Source:HGNC Symbol;Acc:HGNC:11056]
776	ENSG00000237987	LOC105378137	0.312798	0.190602	2.43592	0.0205265	0.868319	0.828676	19 x 29		6 q27
777	ENSG00000278985		-0.255	-0.118692	-2.4461	0.0205465	0.868319	0.828712	12 x 21		16 q23
778	ENSG00000003147	ICA1	-0.741546	-0.253733	-2.4335	0.0205606	0.868319	0.828738	11 x 35		7 p21	islet cell autoantigen 1 [Source:HGNC Symbol;Acc:HGNC:5343]
779	ENSG00000124831	LRRFIP1	-0.433829	-0.182271	-2.43308	0.0205844	0.868319	0.828782	2 x 13	I	2 q37	LRR binding FLII interacting protein 1 [Source:HGNC Symbol;Acc:HGNC:6702]
780	ENSG00000214842	RAD51AP2	0.480908	0.313525	2.4326	0.0205918	0.868319	0.828795	18 x 25		2 p24	RAD51 associated protein 2 [Source:HGNC Symbol;Acc:HGNC:34417]
781	ENSG00000167118	URM1	0.408901	0.259119	2.43273	0.0205996	0.908208	0.82881	39 x 36		9 q34	ubiquitin related modifier 1 [Source:HGNC Symbol;Acc:HGNC:28378]
782	ENSG00000277383		0.389976	0.245256	2.4594	0.0206618	0.908208	0.829028	31 x 34		19 q13
783	ENSG00000168944	CEP120	-0.440951	-0.184467	-2.43553	0.0206785	0.908208	0.829086	2 x 15	I	5 q23	centrosomal protein 120 [Source:HGNC Symbol;Acc:HGNC:26690]
784	ENSG00000185483	ROR1	-0.839228	-0.266383	-2.4326	0.0206998	0.908208	0.829161	10 x 5		1 p31	receptor tyrosine kinase like orphan receptor 1 [Source:HGNC Symbol;Acc:HGNC:10256]
785	ENSG00000183604	SMG1P5	0.362341	0.225339	2.42935	0.0207336	0.908208	0.829278	6 x 20		16 p11	SMG1P5, nonsense mediated mRNA decay associated PI3K related kinase pseudogene 5 [Source:HGNC Symbol;Acc:HGNC:49862]
786	ENSG00000221829	FANCG	0.528514	0.350937	2.42885	0.0207698	0.908208	0.829404	38 x 28	A	9 p13	Fanconi anemia complementation group G [Source:HGNC Symbol;Acc:HGNC:3588]
787	ENSG00000225951		0.29188	0.176308	2.42673	0.0208699	0.908208	0.829749	11 x 21		9 q34	ODF2 antisense RNA 1 [Source:HGNC Symbol;Acc:HGNC:49461]
788	ENSG00000172667	ZMAT3	-0.509992	-0.204427	-2.43238	0.0208953	0.908208	0.829837	26 x 5		3 q26	zinc finger matrin-type 3 [Source:HGNC Symbol;Acc:HGNC:29983]
789	ENSG00000150760	DOCK1	-0.478053	-0.195494	-2.42591	0.0209134	0.908208	0.829899	5 x 4		10 q26	dedicator of cytokinesis 1 [Source:HGNC Symbol;Acc:HGNC:2987]
790	ENSG00000267394		0.389356	0.244805	2.42807	0.0209627	0.908208	0.830067	23 x 13		17 q21
791	ENSG00000116128	BCL9	-0.516767	-0.206256	-2.42348	0.0210304	0.908208	0.830297	1 x 20		1 q21	B-cell CLL/lymphoma 9 [Source:HGNC Symbol;Acc:HGNC:1008]
792	ENSG00000124557	BTN1A1	-0.343828	-0.152299	-2.42388	0.0210309	0.908208	0.830298	13 x 9		6 p22	butyrophilin subfamily 1 member A1 [Source:HGNC Symbol;Acc:HGNC:1135]
793	ENSG00000100084	HIRA	0.380872	0.238652	2.42994	0.0211484	0.908208	0.830694	21 x 20		22 q11	histone cell cycle regulator [Source:HGNC Symbol;Acc:HGNC:4916]
794	ENSG00000105655	ISYNA1	0.652408	0.453686	2.42461	0.0211527	0.908208	0.830709	31 x 31		19 p13	inositol-3-phosphate synthase 1 [Source:HGNC Symbol;Acc:HGNC:29821]
795	ENSG00000134352	IL6ST	-0.516424	-0.206164	-2.42167	0.0211758	0.908208	0.830786	2 x 4	H	5 q11	interleukin 6 signal transducer [Source:HGNC Symbol;Acc:HGNC:6021]
796	ENSG00000155962	CLIC2	-0.615205	-0.230199	-2.42527	0.0211814	0.908208	0.830805	35 x 4		X q28	chloride intracellular channel 2 [Source:HGNC Symbol;Acc:HGNC:2063]
797	ENSG00000080603	SRCAP	0.35148	0.217617	2.457	0.0211846	0.908208	0.830816	3 x 8	H	16 p11	Snf2 related CREBBP activator protein [Source:HGNC Symbol;Acc:HGNC:16974]
798	ENSG00000264520		-0.33933	-0.150693	-2.41881	0.0212492	0.908208	0.831031	6 x 20		7 p14
799	ENSG00000274370		-0.758648	-0.256297	-2.47034	0.0212539	0.908208	0.831046	24 x 28		17 q25
800	ENSG00000198517	MAFK	-0.601395	-0.227136	-2.43288	0.0212601	0.908208	0.831067	20 x 17		7 p22	MAF bZIP transcription factor K [Source:HGNC Symbol;Acc:HGNC:6782]
801	ENSG00000261963		0.655228	0.456115	2.422	0.0212607	0.908208	0.831069	17 x 16		17 p13	coiled-coil domain containing 92B [Source:HGNC Symbol;Acc:HGNC:52279]
802	ENSG00000069998	HDHD5	0.411347	0.260924	2.41711	0.0213385	0.908208	0.831326	34 x 30		22 q11	haloacid dehalogenase like hydrolase domain containing 5 [Source:HGNC Symbol;Acc:HGNC:1843]
803	ENSG00000260536		-0.329528	-0.147159	-2.41945	0.0213539	0.908208	0.831377	11 x 17		20 q11
804	ENSG00000143653	SCCPDH	0.54294	0.362501	2.41474	0.0214567	0.908208	0.831715	6 x 36		1 q44	saccharopine dehydrogenase (putative) [Source:HGNC Symbol;Acc:HGNC:24275]
805	ENSG00000184647	PRSS55	-0.443477	-0.18524	-2.44339	0.0215016	0.908208	0.831861	14 x 13		8 p23	protease, serine 55 [Source:HGNC Symbol;Acc:HGNC:30824]
806	ENSG00000105926	MPP6	-0.517971	-0.206578	-2.41512	0.0215374	0.908208	0.831977	33 x 22	B	7 p15	membrane palmitoylated protein 6 [Source:HGNC Symbol;Acc:HGNC:18167]
807	ENSG00000251669	FAM86EP	0.557549	0.374319	2.41384	0.0215559	0.908208	0.832037	17 x 39		4 p16	family with sequence similarity 86 member E, pseudogene [Source:HGNC Symbol;Acc:HGNC:28017]
808	ENSG00000212533		0.262681	0.156727	2.43751	0.021618	0.908208	0.832237	10 x 16		12 p11	Small nucleolar RNA SNORA75 [Source:RFAM;Acc:RF00072]
809	ENSG00000122952	ZWINT	0.489819	0.320441	2.41188	0.0216285	0.908208	0.832271	40 x 27	A	10 q21	ZW10 interacting kinetochore protein [Source:HGNC Symbol;Acc:HGNC:13195]
810	ENSG00000227117		-0.430026	-0.181087	-2.4542	0.0216419	0.908208	0.832314	15 x 15		22 q12	HORMAD2 and MTMR3 antisense RNA 1 [Source:HGNC Symbol;Acc:HGNC:50729]
811	ENSG00000188738	FSIP2	-0.7804	-0.259344	-2.444	0.0216499	0.908208	0.83234	4 x 20		2 q32	fibrous sheath interacting protein 2 [Source:HGNC Symbol;Acc:HGNC:21675]
812	ENSG00000214973		0.338418	0.20841	2.41048	0.0216687	0.908208	0.8324	24 x 36		1 p36	coiled-coil-helix-coiled-coil-helix domain containing 3 pseudogene 3 [Source:HGNC Symbol;Acc:HGNC:44699]
813	ENSG00000140675	SLC5A2	0.783647	0.571011	2.40853	0.021762	0.908208	0.832698	6 x 31		16 p11	solute carrier family 5 member 2 [Source:HGNC Symbol;Acc:HGNC:11037]
814	ENSG00000265055		0.603193	0.411939	2.42437	0.0217877	0.908208	0.83278	32 x 34		17 q24
815	ENSG00000034971	MYOC	-0.952053	-0.274976	-2.46396	0.0218144	0.908208	0.832865	23 x 26		1 q24	myocilin [Source:HGNC Symbol;Acc:HGNC:7610]
816	ENSG00000269646		0.304786	0.185101	2.41562	0.0218729	0.908208	0.833049	13 x 26		19 q13
817	ENSG00000243175		-0.295708	-0.13459	-2.40509	0.0219409	0.908208	0.833263	27 x 36		4 q31	ribosomal protein SA pseudogene 36 [Source:HGNC Symbol;Acc:HGNC:35727]
818	ENSG00000170270	GON7	0.536505	0.357329	2.40438	0.0219726	0.908208	0.833362	20 x 40		14 q32	GON7, KEOPS complex subunit homolog [Source:HGNC Symbol;Acc:HGNC:20356]
819	ENSG00000223734	LOC105373463	0.370483	0.231167	2.45662	0.0219839	0.908208	0.833398	29 x 33		2 p24
820	ENSG00000154263	ABCA10	-0.581873	-0.222642	-2.40404	0.0219906	0.908208	0.833419	13 x 1		17 q24	ATP binding cassette subfamily A member 10 [Source:HGNC Symbol;Acc:HGNC:30]
821	ENSG00000198898	CAPZA2	0.354962	0.220086	2.40398	0.021993	0.908208	0.833426	30 x 14		7 q31	capping actin protein of muscle Z-line alpha subunit 2 [Source:HGNC Symbol;Acc:HGNC:1490]
822	ENSG00000276744		0.447996	0.288332	2.40398	0.0220028	0.908208	0.833457	9 x 30		15 q24
823	ENSG00000243155		-0.439505	-0.184023	-2.41476	0.0220349	0.908208	0.833557	15 x 25		1 q25
824	ENSG00000196427	NBPF4	0.175221	0.100661	2.41182	0.022095	0.908208	0.833743	6 x 36		1 p13	NBPF member 4 [Source:HGNC Symbol;Acc:HGNC:26550]
825	ENSG00000143971	ETAA1	0.285003	0.171658	2.39965	0.0222174	0.908208	0.83412	3 x 15		2 p14	ETAA1, ATR kinase activator [Source:HGNC Symbol;Acc:HGNC:24648]
826	ENSG00000145833	DDX46	-0.301065	-0.136619	-2.40245	0.0222203	0.908208	0.834129	4 x 15		5 q31	DEAD-box helicase 46 [Source:HGNC Symbol;Acc:HGNC:18681]
827	ENSG00000279561	LOC100132249	0.769902	0.558314	2.40142	0.0222387	0.908208	0.834185	3 x 32		9 p11
828	ENSG00000236173		0.330197	0.202659	2.3984	0.0223035	0.908208	0.834383	17 x 11		6 q27
829	ENSG00000255020	LOC100129129	0.369624	0.23055	2.41356	0.0223241	0.908208	0.834445	22 x 33		8 p23
830	ENSG00000249685		-0.305979	-0.138468	-2.41434	0.0223297	0.908208	0.834462	11 x 12		4 p14
831	ENSG00000205534		0.454331	0.293138	2.43694	0.0223884	0.908208	0.83464	18 x 32		16 p11	SMG1P2, nonsense mediated mRNA decay associated PI3K related kinase pseudogene 2 [Source:HGNC Symbol;Acc:HGNC:49859]
832	ENSG00000272361		-0.34404	-0.152374	-2.39768	0.022413	0.908208	0.834714	14 x 29		7 p21
833	ENSG00000224411		0.481112	0.313683	2.39809	0.0224904	0.908208	0.834947	27 x 14		11 p14	heat shock protein 90 alpha family class A member 2, pseudogene [Source:HGNC Symbol;Acc:HGNC:5256]
834	ENSG00000117036	ETV3	-0.41629	-0.176752	-2.40758	0.0225284	0.908208	0.83506	6 x 10		1 q23	ETS variant 3 [Source:HGNC Symbol;Acc:HGNC:3492]
835	ENSG00000162630	B3GALT2	-0.57062	-0.219963	-2.43175	0.0226148	0.908208	0.835317	12 x 6		1 q31	beta-1,3-galactosyltransferase 2 [Source:HGNC Symbol;Acc:HGNC:917]
836	ENSG00000226770	LOC100506682	0.210751	0.12297	2.3955	0.0226162	0.908208	0.835321	20 x 36		7 q31
837	ENSG00000161649	CD300LG	-0.988744	-0.27638	-2.42881	0.0226552	0.908208	0.835437	14 x 1		17 q21	CD300 molecule like family member g [Source:HGNC Symbol;Acc:HGNC:30455]
838	ENSG00000136247	ZDHHC4	-0.53489	-0.211033	-2.39695	0.0226567	0.908208	0.835441	19 x 37		7 p22	zinc finger DHHC-type containing 4 [Source:HGNC Symbol;Acc:HGNC:18471]
839	ENSG00000131386	GALNT15	-0.844415	-0.266919	-2.40092	0.0226568	0.908208	0.835442	19 x 1	G	3 p25	polypeptide N-acetylgalactosaminyltransferase 15 [Source:HGNC Symbol;Acc:HGNC:21531]
840	ENSG00000196296	ATP2A1	0.674439	0.472772	2.39168	0.0226736	0.908208	0.835491	8 x 27	J	16 p11	ATPase sarcoplasmic/endoplasmic reticulum Ca2+ transporting 1 [Source:HGNC Symbol;Acc:HGNC:811]
841	ENSG00000116254	CHD5	0.491075	0.321419	2.38897	0.0227759	0.908208	0.835792	30 x 28		1 p36	chromodomain helicase DNA binding protein 5 [Source:HGNC Symbol;Acc:HGNC:16816]
842	ENSG00000130714	POMT1	0.406347	0.257238	2.39481	0.022794	0.908208	0.835845	21 x 14		9 q34	protein O-mannosyltransferase 1 [Source:HGNC Symbol;Acc:HGNC:9202]
843	ENSG00000135506	OS9	-0.358195	-0.157359	-2.39768	0.0228054	0.908208	0.835878	23 x 15		12 q13	OS9, endoplasmic reticulum lectin [Source:HGNC Symbol;Acc:HGNC:16994]
844	ENSG00000128191	DGCR8	0.289406	0.174632	2.39361	0.0228474	0.908208	0.836	17 x 19		22 q11	DGCR8, microprocessor complex subunit [Source:HGNC Symbol;Acc:HGNC:2847]
845	ENSG00000186480	INSIG1	0.680476	0.478044	2.38876	0.0228628	0.908208	0.836045	40 x 31	A	7 q36	insulin induced gene 1 [Source:HGNC Symbol;Acc:HGNC:6083]
846	ENSG00000170927	PKHD1	-1.52771	-0.218385	-2.39308	0.0229158	0.908208	0.836199	24 x 27		6 p12	PKHD1, fibrocystin/polyductin [Source:HGNC Symbol;Acc:HGNC:9016]
847	ENSG00000235513		-0.419151	-0.177663	-2.38535	0.0229675	0.908208	0.836348	10 x 11		22 q13
848	ENSG00000236779		0.293257	0.177242	2.40659	0.0229934	0.908208	0.836423	12 x 15		1 q32
849	ENSG00000105679	GAPDHS	0.317596	0.193911	2.3947	0.0229971	0.908208	0.836433	17 x 21		19 q13	glyceraldehyde-3-phosphate dehydrogenase, spermatogenic [Source:HGNC Symbol;Acc:HGNC:24864]
850	ENSG00000078668	VDAC3	0.485279	0.316912	2.38864	0.0230088	0.908208	0.836467	38 x 32		8 p11	voltage dependent anion channel 3 [Source:HGNC Symbol;Acc:HGNC:12674]
851	ENSG00000231437	LINC01750	-0.652843	-0.238056	-2.38872	0.0230418	0.908208	0.836562	7 x 33		1 p13	long intergenic non-protein coding RNA 1750 [Source:HGNC Symbol;Acc:HGNC:52538]
852	ENSG00000199568	RNU5A-1	-0.590672	-0.224691	-2.45559	0.0230639	0.908208	0.836625	28 x 35		15 q22	RNA, U5A small nuclear 1 [Source:HGNC Symbol;Acc:HGNC:10211]
853	ENSG00000267248		0.567435	0.382377	2.39891	0.0230956	0.908208	0.836715	29 x 33		17 q23
854	ENSG00000261775		0.228665	0.13446	2.38702	0.0231554	0.908208	0.836886	11 x 16		15 q24
855	ENSG00000277010		-0.314889	-0.14179	-2.43991	0.0232005	0.908208	0.837013	9 x 35		16 p13
856	ENSG00000247092		0.665223	0.464758	2.38583	0.0232084	0.908208	0.837035	31 x 34		14 q32	small nucleolar RNA host gene 10 [Source:HGNC Symbol;Acc:HGNC:27510]
857	ENSG00000225077		0.450678	0.290364	2.38398	0.0232684	0.908208	0.837205	37 x 28		1 p36	long intergenic non-protein coding RNA 337 [Source:HGNC Symbol;Acc:HGNC:28620]
858	ENSG00000258661		0.50355	0.331175	2.39595	0.0233024	0.908208	0.8373	35 x 17		14 q13
859	ENSG00000113621	TXNDC15	-0.332223	-0.148135	-2.37888	0.0233149	0.908208	0.837335	19 x 38		5 q31	thioredoxin domain containing 15 [Source:HGNC Symbol;Acc:HGNC:20652]
860	ENSG00000007923	DNAJC11	0.530597	0.3526	2.39024	0.0233468	0.908208	0.837425	24 x 18		1 p36	DnaJ heat shock protein family (Hsp40) member C11 [Source:HGNC Symbol;Acc:HGNC:25570]
861	ENSG00000149930	TAOK2	0.293763	0.177585	2.39458	0.0234193	0.908208	0.837627	20 x 16		16 p11	TAO kinase 2 [Source:HGNC Symbol;Acc:HGNC:16835]
862	ENSG00000077080	ACTL6B	0.303828	0.184445	2.38406	0.0234604	0.908208	0.837741	1 x 33		7 q22	actin like 6B [Source:HGNC Symbol;Acc:HGNC:160]
863	ENSG00000178026	LRRC75B	1.1059	0.896129	2.38387	0.0234687	0.908208	0.837764	31 x 30		22 q11	leucine rich repeat containing 75B [Source:HGNC Symbol;Acc:HGNC:33155]
864	ENSG00000106069	CHN2	-0.791981	-0.260868	-2.38277	0.0234709	0.908208	0.83777	2 x 2	H	7 p14	chimerin 2 [Source:HGNC Symbol;Acc:HGNC:1944]
865	ENSG00000261840	LOC730183	0.710267	0.504335	2.40111	0.0234968	0.908208	0.837841	31 x 34		16 p11
866	ENSG00000177733	HNRNPA0	-0.388841	-0.167802	-2.39631	0.0235094	0.908208	0.837876	21 x 36		5 q31	heterogeneous nuclear ribonucleoprotein A0 [Source:HGNC Symbol;Acc:HGNC:5030]
867	ENSG00000279392		0.380321	0.238254	2.37619	0.0235161	0.908208	0.837895	24 x 38		14 q22
868	ENSG00000181444	ZNF467	0.488394	0.319332	2.37791	0.0235196	0.908208	0.837904	15 x 40		7 q36	zinc finger protein 467 [Source:HGNC Symbol;Acc:HGNC:23154]
869	ENSG00000142149	HUNK	0.7798	0.567448	2.41516	0.0235596	0.908208	0.838015	6 x 6	H	21 q22	hormonally up-regulated Neu-associated kinase [Source:HGNC Symbol;Acc:HGNC:13326]
870	ENSG00000141027	NCOR1	-0.356062	-0.156614	-2.37411	0.0236429	0.908208	0.838243	3 x 18		17 p11	nuclear receptor corepressor 1 [Source:HGNC Symbol;Acc:HGNC:7672]
871	ENSG00000259494	MRPL46	0.43594	0.27924	2.37261	0.0236452	0.908208	0.838249	22 x 40		15 q25	mitochondrial ribosomal protein L46 [Source:HGNC Symbol;Acc:HGNC:1192]
872	ENSG00000206129		-1.08786	-0.276762	-2.37432	0.0236612	0.908208	0.838293	26 x 30		18 q21
873	ENSG00000183044	ABAT	-0.695962	-0.246175	-2.3778	0.0236621	0.908208	0.838295	5 x 37		16 p13	4-aminobutyrate aminotransferase [Source:HGNC Symbol;Acc:HGNC:23]
874	ENSG00000095002	MSH2	0.482497	0.314755	2.3872	0.0237302	0.908208	0.83848	29 x 20		2 p21	mutS homolog 2 [Source:HGNC Symbol;Acc:HGNC:7325]
875	ENSG00000120162	MOB3B	-0.724537	-0.251036	-2.37067	0.0237877	0.908208	0.838636	10 x 6		9 p21	MOB kinase activator 3B [Source:HGNC Symbol;Acc:HGNC:23825]
876	ENSG00000163884	KLF15	-0.910833	-0.272584	-2.37286	0.0238068	0.908208	0.838688	23 x 25		3 q21	Kruppel like factor 15 [Source:HGNC Symbol;Acc:HGNC:14536]
877	ENSG00000273066		0.457196	0.295319	2.40543	0.023834	0.908208	0.838761	17 x 19		9 q34
878	ENSG00000094804	CDC6	0.689465	0.48593	2.36922	0.0238369	0.908208	0.838769	40 x 26	A	17 q21	cell division cycle 6 [Source:HGNC Symbol;Acc:HGNC:1744]
879	ENSG00000244187	TMEM141	0.642432	0.445124	2.37454	0.0238419	0.908208	0.838782	40 x 40		9 q34	transmembrane protein 141 [Source:HGNC Symbol;Acc:HGNC:28211]
880	ENSG00000153993	SEMA3D	-1.27503	-0.263906	-2.36876	0.023856	0.908208	0.83882	21 x 1	G	7 q21	semaphorin 3D [Source:HGNC Symbol;Acc:HGNC:10726]
881	ENSG00000250900		0.45768	0.295688	2.37769	0.0239084	0.908208	0.83896	10 x 31		5 q35
882	ENSG00000151304	SRFBP1	-0.408093	-0.174119	-2.40076	0.0239147	0.908208	0.838977	1 x 13	I	5 q23	serum response factor binding protein 1 [Source:HGNC Symbol;Acc:HGNC:26333]
883	ENSG00000059758	CDK17	-0.410948	-0.17504	-2.37361	0.0239356	0.908208	0.839033	1 x 17		12 q23	cyclin dependent kinase 17 [Source:HGNC Symbol;Acc:HGNC:8750]
884	ENSG00000235706	DICER1-AS1	0.626444	0.431509	2.37774	0.0239428	0.908208	0.839052	7 x 30		14 q32	DICER1 antisense RNA 1 [Source:HGNC Symbol;Acc:HGNC:43017]
885	ENSG00000273733		-0.539418	-0.2122	-2.38482	0.0240014	0.908208	0.839208	13 x 30		19 p13
886	ENSG00000184347	SLIT3	-1.05778	-0.277172	-2.36521	0.0240565	0.908208	0.839354	18 x 1	G	5 q35	slit guidance ligand 3 [Source:HGNC Symbol;Acc:HGNC:11087]
887	ENSG00000130957	FBP2	0.50867	0.335202	2.3816	0.024139	0.908208	0.839572	27 x 31		9 q22	fructose-bisphosphatase 2 [Source:HGNC Symbol;Acc:HGNC:3607]
888	ENSG00000226468		-0.688978	-0.244924	-2.37153	0.0241651	0.908208	0.839641	26 x 30		7 p14
889	ENSG00000185304	RGPD2	-0.540098	-0.212375	-2.37292	0.0241977	0.908208	0.839726	14 x 12		2 p11	RANBP2-like and GRIP domain containing 2 [Source:HGNC Symbol;Acc:HGNC:32415]
890	ENSG00000273391		0.707304	0.5017	2.37604	0.0241992	0.908208	0.83973	32 x 33		7 q34
891	ENSG00000167701	GPT	1.15272	0.947745	2.36765	0.0242152	0.908208	0.839772	8 x 28		8 q24	glutamic--pyruvic transaminase [Source:HGNC Symbol;Acc:HGNC:4552]
892	ENSG00000116985	BMP8B	0.79805	0.584419	2.37979	0.0242287	0.908208	0.839807	26 x 12		1 p34	bone morphogenetic protein 8b [Source:HGNC Symbol;Acc:HGNC:1075]
893	ENSG00000067842	ATP2B3	0.932166	0.714313	2.3753	0.0242341	0.908208	0.839821	29 x 27		X q28	ATPase plasma membrane Ca2+ transporting 3 [Source:HGNC Symbol;Acc:HGNC:816]
894	ENSG00000106479	ZNF862	0.639712	0.442799	2.36744	0.0242382	0.908208	0.839832	5 x 26		7 q36	zinc finger protein 862 [Source:HGNC Symbol;Acc:HGNC:34519]
895	ENSG00000267055		-0.400236	-0.171564	-2.3862	0.0242499	0.908208	0.839862	12 x 12		7 p21
896	ENSG00000180953	ST20	0.557789	0.374513	2.36718	0.0243181	0.908208	0.84004	35 x 35		15 q25	suppressor of tumorigenicity 20 [Source:HGNC Symbol;Acc:HGNC:33520]
897	ENSG00000215812		-0.423503	-0.179041	-2.39189	0.0243282	0.908208	0.840066	12 x 17		1 q42	zinc finger protein 847, pseudogene [Source:HGNC Symbol;Acc:HGNC:34384]
898	ENSG00000117533	VAMP4	-0.474458	-0.194456	-2.37143	0.0243295	0.908208	0.840069	1 x 16	I	1 q24	vesicle associated membrane protein 4 [Source:HGNC Symbol;Acc:HGNC:12645]
899	ENSG00000203485	INF2	0.771863	0.56012	2.36112	0.02434	0.908208	0.840096	21 x 14		14 q32	inverted formin, FH2 and WH2 domain containing [Source:HGNC Symbol;Acc:HGNC:23791]
900	ENSG00000263961	C1orf186	-0.665709	-0.240577	-2.36028	0.0243582	0.908208	0.840143	39 x 10	D	1 q32	chromosome 1 open reading frame 186 [Source:HGNC Symbol;Acc:HGNC:25341]
901	ENSG00000235651		0.321009	0.196272	2.35977	0.0244089	0.908208	0.840274	26 x 18		2 q21
902	ENSG00000257696		0.303276	0.184067	2.35859	0.0244442	0.908208	0.840365	9 x 35		12 q23
903	ENSG00000145293	ENOPH1	0.461751	0.298794	2.35712	0.0245033	0.908208	0.840516	39 x 32	A	4 q21	enolase-phosphatase 1 [Source:HGNC Symbol;Acc:HGNC:24599]
904	ENSG00000238961	SNORA47	-0.82014	-0.264291	-2.45273	0.0245587	0.908208	0.840658	16 x 30		5 q13	small nucleolar RNA, H/ACA box 47 [Source:HGNC Symbol;Acc:HGNC:32640]
905	ENSG00000153015	CWC27	-0.481275	-0.196418	-2.36793	0.0245935	0.908208	0.840746	21 x 36		5 q12	CWC27 spliceosome associated protein homolog [Source:HGNC Symbol;Acc:HGNC:10664]
906	ENSG00000108352	RAPGEFL1	0.631237	0.435577	2.4068	0.0246657	0.908208	0.840929	1 x 33		17 q21	Rap guanine nucleotide exchange factor like 1 [Source:HGNC Symbol;Acc:HGNC:17428]
907	ENSG00000138593	SECISBP2L	-0.501327	-0.202055	-2.35612	0.0247499	0.908208	0.841141	3 x 9	I	15 q21	SECIS binding protein 2 like [Source:HGNC Symbol;Acc:HGNC:28997]
908	ENSG00000138356	AOX1	-0.97972	-0.276098	-2.37235	0.0248181	0.908208	0.841312	15 x 1		2 q33	aldehyde oxidase 1 [Source:HGNC Symbol;Acc:HGNC:553]
909	ENSG00000239704	CDRT4	-0.405817	-0.173382	-2.35149	0.0248202	0.908208	0.841317	6 x 25		17 p12	CMT1A duplicated region transcript 4 [Source:HGNC Symbol;Acc:HGNC:14383]
910	ENSG00000232903	LINC01166	1.17723	0.975215	2.38746	0.0248931	0.908208	0.841498	16 x 19		10 q26	long intergenic non-protein coding RNA 1166 [Source:HGNC Symbol;Acc:HGNC:49535]
911	ENSG00000260704	LINC00543	0.821549	0.606519	2.36977	0.0249057	0.908208	0.84153	35 x 16		13 q12	long intergenic non-protein coding RNA 543 [Source:HGNC Symbol;Acc:HGNC:43678]
912	ENSG00000140694	PARN	0.342905	0.211563	2.34876	0.0250446	0.908208	0.841872	26 x 13		16 p13	poly(A)-specific ribonuclease [Source:HGNC Symbol;Acc:HGNC:8609]
913	ENSG00000070961	ATP2B1	-0.504452	-0.202915	-2.35157	0.0250448	0.908208	0.841873	3 x 14		12 q21	ATPase plasma membrane Ca2+ transporting 1 [Source:HGNC Symbol;Acc:HGNC:814]
914	ENSG00000214546		0.624601	0.429948	2.37897	0.0250592	0.908208	0.841908	37 x 19	C	17 q12
915	ENSG00000135624	CCT7	0.256236	0.152463	2.35469	0.025117	0.908208	0.84205	37 x 31		2 p13	chaperonin containing TCP1 subunit 7 [Source:HGNC Symbol;Acc:HGNC:1622]
916	ENSG00000185298	CCDC137	0.449793	0.289693	2.34639	0.0251215	0.908208	0.842061	40 x 32	A	17 q25	coiled-coil domain containing 137 [Source:HGNC Symbol;Acc:HGNC:33451]
917	ENSG00000176473	WDR25	0.417811	0.265709	2.35579	0.0251476	0.908208	0.842124	19 x 40		14 q32	WD repeat domain 25 [Source:HGNC Symbol;Acc:HGNC:21064]
918	ENSG00000262089		0.482808	0.314996	2.34874	0.0251498	0.908208	0.84213	8 x 30		17 p13
919	ENSG00000224566		-0.764509	-0.257141	-2.39432	0.0252266	0.908208	0.842316	9 x 18		1 q42	family with sequence similarity 96 member A pseudogene 2 [Source:HGNC Symbol;Acc:HGNC:43862]
920	ENSG00000164815	ORC5	0.39186	0.246628	2.34519	0.0252658	0.908208	0.842411	31 x 16		7 q22	origin recognition complex subunit 5 [Source:HGNC Symbol;Acc:HGNC:8491]
921	ENSG00000249936		-0.510136	-0.204466	-2.35509	0.0253339	0.908208	0.842575	25 x 37		4 p12	ras-related C3 botulinum toxin substrate 1 pseudogene 2 [Source:HGNC Symbol;Acc:HGNC:31414]
922	ENSG00000149090	PAMR1	-0.720484	-0.250371	-2.35417	0.0253553	0.908208	0.842627	16 x 2		11 p13	peptidase domain containing associated with muscle regeneration 1 [Source:HGNC Symbol;Acc:HGNC:24554]
923	ENSG00000170835	CEL	0.910465	0.692677	2.34409	0.0253756	0.908208	0.842675	30 x 28		9 q34	carboxyl ester lipase [Source:HGNC Symbol;Acc:HGNC:1848]
924	ENSG00000167355		-0.592386	-0.225086	-2.38023	0.0254051	0.908208	0.842746	24 x 31		11 p15
925	ENSG00000255649		-0.208333	-0.0994343	-2.35477	0.0254447	0.908208	0.842841	14 x 14		12 p13
926	ENSG00000230033		0.649582	0.451256	2.34031	0.0254673	0.908208	0.842895	35 x 17		7 q36
927	ENSG00000007968	E2F2	0.707331	0.501724	2.33997	0.0254862	0.908208	0.842939	40 x 26	A	1 p36	E2F transcription factor 2 [Source:HGNC Symbol;Acc:HGNC:3114]
928	ENSG00000185305	ARL15	-0.398928	-0.171136	-2.33976	0.0255066	0.908208	0.842988	4 x 3	H	5 q11	ADP ribosylation factor like GTPase 15 [Source:HGNC Symbol;Acc:HGNC:25945]
929	ENSG00000181938	GINS3	0.414025	0.262903	2.34044	0.0255309	0.908208	0.843046	38 x 27	A	16 q21	GINS complex subunit 3 [Source:HGNC Symbol;Acc:HGNC:25851]
930	ENSG00000272040		-0.331684	-0.147941	-2.33938	0.0255627	0.908208	0.843121	12 x 31		5 q13
931	ENSG00000170629	DPY19L2P2	0.808676	0.594378	2.33886	0.025579	0.908208	0.843159	1 x 31		7 q22	DPY19L2 pseudogene 2 [Source:HGNC Symbol;Acc:HGNC:21764]
932	ENSG00000264655		0.284464	0.171294	2.33849	0.0255852	0.908208	0.843174	26 x 35		17 q21
933	ENSG00000249631		-0.331231	-0.147776	-2.35739	0.0255911	0.908208	0.843188	22 x 31		4 p15
934	ENSG00000167525	PROCA1	0.558432	0.375036	2.33784	0.0256123	0.908208	0.843238	7 x 28		17 q11	protein interacting with cyclin A1 [Source:HGNC Symbol;Acc:HGNC:28600]
935	ENSG00000269834		-0.740269	-0.253535	-2.33773	0.0256174	0.908208	0.84325	12 x 28		19 q13	ZNF528 antisense RNA 1 [Source:HGNC Symbol;Acc:HGNC:51305]
936	ENSG00000179673	RPRML	0.45524	0.29383	2.35573	0.0257186	0.908208	0.843487	34 x 20		17 q21	reprimo like [Source:HGNC Symbol;Acc:HGNC:32422]
937	ENSG00000167775	CD320	0.699935	0.495166	2.33736	0.0257272	0.908208	0.843507	36 x 39		19 p13	CD320 molecule [Source:HGNC Symbol;Acc:HGNC:16692]
938	ENSG00000171680	PLEKHG5	0.526324	0.34919	2.33364	0.0258556	0.908208	0.843806	19 x 19		1 p36	pleckstrin homology and RhoGEF domain containing G5 [Source:HGNC Symbol;Acc:HGNC:29105]
939	ENSG00000259774	LOC103171574	0.31422	0.191581	2.33337	0.0258813	0.908208	0.843865	15 x 17		15 q25
940	ENSG00000166090	IL25	0.29589	0.179031	2.34526	0.0258961	0.908208	0.843899	18 x 34		14 q11	interleukin 25 [Source:HGNC Symbol;Acc:HGNC:13765]
941	ENSG00000224265		0.44868	0.28885	2.34277	0.0258998	0.908208	0.843908	19 x 33		10 q11
942	ENSG00000279536		0.577304	0.390472	2.34045	0.0259521	0.908208	0.844028	3 x 27		7 q36
943	ENSG00000265374		0.223933	0.131409	2.33327	0.0259582	0.908208	0.844042	19 x 28		18 q11	long intergenic non-protein coding RNA 1908 [Source:HGNC Symbol;Acc:HGNC:52727]
944	ENSG00000095209	TMEM38B	0.657802	0.458336	2.33929	0.0259854	0.908208	0.844105	31 x 15		9 q31	transmembrane protein 38B [Source:HGNC Symbol;Acc:HGNC:25535]
945	ENSG00000164904	ALDH7A1	-0.412739	-0.175616	-2.33102	0.0260098	0.908208	0.844161	22 x 39		5 q23	aldehyde dehydrogenase 7 family member A1 [Source:HGNC Symbol;Acc:HGNC:877]
946	ENSG00000250451	HOXC-AS1	0.817259	0.602464	2.37169	0.0260217	0.908208	0.844188	18 x 11		12 q13	HOXC cluster antisense RNA 1 [Source:HGNC Symbol;Acc:HGNC:43749]
947	ENSG00000172081	MOB3A	-0.30629	-0.138585	-2.33049	0.0260436	0.908208	0.844238	21 x 11		19 p13	MOB kinase activator 3A [Source:HGNC Symbol;Acc:HGNC:29802]
948	ENSG00000225173		0.472495	0.307032	2.3317	0.0260541	0.908208	0.844262	22 x 31		6 p22
949	ENSG00000123384	LRP1	-0.682352	-0.243714	-2.33261	0.0260602	0.908208	0.844276	19 x 2	G	12 q13	LDL receptor related protein 1 [Source:HGNC Symbol;Acc:HGNC:6692]
950	ENSG00000006837	CDKL3	-0.382016	-0.165518	-2.34082	0.0260645	0.908208	0.844286	7 x 32		5 q31	cyclin dependent kinase like 3 [Source:HGNC Symbol;Acc:HGNC:15483]
951	ENSG00000006282	SPATA20	0.62514	0.430404	2.33093	0.026109	0.908208	0.844387	15 x 38		17 q21	spermatogenesis associated 20 [Source:HGNC Symbol;Acc:HGNC:26125]
952	ENSG00000266446		0.367805	0.229247	2.33322	0.0261528	0.908208	0.844486	15 x 15		9 p21
953	ENSG00000189180	ZNF33A	-0.431062	-0.181411	-2.32854	0.0261709	0.908208	0.844527	3 x 19		10 p11	zinc finger protein 33A [Source:HGNC Symbol;Acc:HGNC:13096]
954	ENSG00000260468		0.466268	0.302251	2.33716	0.0262735	0.908208	0.844758	12 x 35		16 p13	long intergenic non-protein coding RNA 1290 [Source:HGNC Symbol;Acc:HGNC:50356]
955	ENSG00000100591	AHSA1	0.383977	0.2409	2.33897	0.0262994	0.908208	0.844817	39 x 32	A	14 q24	activator of HSP90 ATPase activity 1 [Source:HGNC Symbol;Acc:HGNC:1189]
956	ENSG00000266733	TBC1D29	0.346649	0.214202	2.33221	0.0263312	0.908208	0.844888	16 x 18		17 q11	TBC1 domain family member 29 [Source:HGNC Symbol;Acc:HGNC:24509]
957	ENSG00000186446	ZNF501	-0.507485	-0.203745	-2.32836	0.0263414	0.908208	0.844911	22 x 28		3 p21	zinc finger protein 501 [Source:HGNC Symbol;Acc:HGNC:23717]
958	ENSG00000168778	TCTN2	-0.596252	-0.225971	-2.32478	0.0263851	0.908208	0.845008	3 x 37		12 q24	tectonic family member 2 [Source:HGNC Symbol;Acc:HGNC:25774]
959	ENSG00000130876	SLC7A10	-0.968831	-0.275702	-2.34571	0.0263908	0.908208	0.845021	12 x 1		19 q13	solute carrier family 7 member 10 [Source:HGNC Symbol;Acc:HGNC:11058]
960	ENSG00000171552	BCL2L1	-0.407444	-0.17391	-2.32405	0.0264471	0.908208	0.845146	17 x 38		20 q11	BCL2 like 1 [Source:HGNC Symbol;Acc:HGNC:992]
961	ENSG00000261105	LMO7-AS1	-0.819438	-0.264211	-2.35929	0.0264872	0.908208	0.845235	37 x 14		13 q22	LMO7 antisense RNA 1 [Source:HGNC Symbol;Acc:HGNC:50277]
962	ENSG00000225361	PPP1R26-AS1	0.59105	0.401827	2.32317	0.026557	0.908208	0.845389	2 x 25		9 q34	PPP1R26 antisense RNA 1 [Source:HGNC Symbol;Acc:HGNC:48717]
963	ENSG00000204539	CDSN	-0.415014	-0.176345	-2.32152	0.0266253	0.908208	0.845539	8 x 11		6 p21	corneodesmosin [Source:HGNC Symbol;Acc:HGNC:1802]
964	ENSG00000125845	BMP2	-0.685594	-0.244309	-2.32104	0.0266484	0.908208	0.84559	14 x 4		20 p12	bone morphogenetic protein 2 [Source:HGNC Symbol;Acc:HGNC:1069]
965	ENSG00000175820	CCDC168	0.35641	0.221115	2.32308	0.0266936	0.908208	0.845688	16 x 19		13 q33	coiled-coil domain containing 168 [Source:HGNC Symbol;Acc:HGNC:26851]
966	ENSG00000228789	HCG22	-0.393875	-0.169472	-2.35655	0.0267549	0.908208	0.845822	15 x 9		6 p21	HLA complex group 22 [Source:HGNC Symbol;Acc:HGNC:27780]
967	ENSG00000268650	LOC102725254	0.494653	0.324208	2.3239	0.0267551	0.908208	0.845822	31 x 35		19 p13
968	ENSG00000165506	DNAAF2	0.427927	0.273239	2.31878	0.0267775	0.908208	0.845871	21 x 38		14 q21	dynein axonemal assembly factor 2 [Source:HGNC Symbol;Acc:HGNC:20188]
969	ENSG00000223714	LOC105373185	0.54099	0.360931	2.31965	0.0267799	0.908208	0.845876	31 x 34		X p11
970	ENSG00000232006		-1.45395	-0.235017	-2.32573	0.0267993	0.908208	0.845918	26 x 29		7 p14
971	ENSG00000260060		0.32103	0.196287	2.31959	0.0268342	0.908208	0.845994	11 x 30		16 p11
972	ENSG00000166803	PCLAF	0.81419	0.599568	2.31754	0.0268818	0.908208	0.846096	40 x 27	A	15 q22	PCNA clamp associated factor [Source:HGNC Symbol;Acc:HGNC:28961]
973	ENSG00000250027		-0.328093	-0.146637	-2.3171	0.0268984	0.908208	0.846132	8 x 16		4 q32
974	ENSG00000224799		0.349744	0.216389	2.31616	0.0269071	0.908208	0.846151	10 x 14		X p11
975	ENSG00000202522		-0.236209	-0.111071	-2.34574	0.0269143	0.908208	0.846166	5 x 19		11 q13	Y RNA [Source:RFAM;Acc:RF00019]
976	ENSG00000249779		0.266136	0.159021	2.31779	0.0269606	0.908208	0.846265	14 x 15		5 p12
977	ENSG00000261320		0.385259	0.241829	2.31602	0.026978	0.908208	0.846303	16 x 17		16 q22
978	ENSG00000108381	ASPA	-0.830554	-0.265455	-2.36127	0.026986	0.908208	0.84632	16 x 1	G	17 p13	aspartoacylase [Source:HGNC Symbol;Acc:HGNC:756]
979	ENSG00000239705		0.361614	0.22482	2.31461	0.027004	0.908208	0.846358	18 x 33		9 q33
980	ENSG00000184209	SNRNP35	-0.438413	-0.183687	-2.35141	0.027017	0.908208	0.846386	28 x 33		12 q24	small nuclear ribonucleoprotein U11/U12 subunit 35 [Source:HGNC Symbol;Acc:HGNC:30852]
981	ENSG00000131844	MCCC2	-0.588426	-0.224172	-2.32734	0.0270192	0.908208	0.84639	1 x 16	I	5 q13	methylcrotonoyl-CoA carboxylase 2 [Source:HGNC Symbol;Acc:HGNC:6937]
982	ENSG00000149742	SLC22A9	-0.251183	-0.117159	-2.31451	0.0270625	0.908208	0.846483	21 x 33		11 q12	solute carrier family 22 member 9 [Source:HGNC Symbol;Acc:HGNC:16261]
983	ENSG00000215375	MYL5	0.766921	0.555574	2.31517	0.0270626	0.908208	0.846483	8 x 31		4 p16	myosin light chain 5 [Source:HGNC Symbol;Acc:HGNC:7586]
984	ENSG00000244560		0.568745	0.383449	2.31836	0.0270753	0.908208	0.84651	6 x 25		7 q36
985	ENSG00000186867	QRFPR	-0.360636	-0.158208	-2.37298	0.027166	0.908208	0.846702	36 x 19		4 q27	pyroglutamylated RFamide peptide receptor [Source:HGNC Symbol;Acc:HGNC:15565]
986	ENSG00000206878		0.235991	0.139206	2.31487	0.0272202	0.908208	0.846816	15 x 15		1 q42	Small nucleolar RNA SNORA51 [Source:RFAM;Acc:RF00432]
987	ENSG00000189045	ANKDD1B	-0.460085	-0.190241	-2.31624	0.0272625	0.908208	0.846905	3 x 28		5 q13	ankyrin repeat and death domain containing 1B [Source:HGNC Symbol;Acc:HGNC:32525]
988	ENSG00000225101		0.456108	0.294491	2.3089	0.0273753	0.908208	0.847141	30 x 9		11 p15	olfactory receptor family 52 subfamily K member 3 pseudogene [Source:HGNC Symbol;Acc:HGNC:15224]
989	ENSG00000233384		0.453606	0.292587	2.31006	0.0274035	0.908208	0.847199	17 x 34		1 q42
990	ENSG00000233985		-0.250363	-0.116828	-2.31465	0.0274283	0.908208	0.847251	24 x 33		1 q24	long intergenic non-protein coding RNA 1681 [Source:HGNC Symbol;Acc:HGNC:52468]
991	ENSG00000237773		-0.649801	-0.237448	-2.33462	0.0274624	0.908208	0.847321	31 x 37		7 p21
992	ENSG00000164292	RHOBTB3	-0.792652	-0.260954	-2.30708	0.0274655	0.908208	0.847328	3 x 4	H	5 q15	Rho related BTB domain containing 3 [Source:HGNC Symbol;Acc:HGNC:18757]
993	ENSG00000090932	DLL3	1.05014	0.836115	2.30823	0.0275177	0.908208	0.847436	33 x 27	B	19 q13	delta like canonical Notch ligand 3 [Source:HGNC Symbol;Acc:HGNC:2909]
994	ENSG00000005189	REXO5	0.689343	0.485822	2.30722	0.0275386	0.908208	0.847478	39 x 29	A	16 p12	RNA exonuclease 5 [Source:HGNC Symbol;Acc:HGNC:24661]
995	ENSG00000271709		-0.484814	-0.197428	-2.34797	0.0275648	0.908208	0.847532	17 x 10		2 q14
996	ENSG00000162191	UBXN1	-0.430051	-0.181095	-2.31589	0.0275827	0.908208	0.847569	34 x 37		11 q12	UBX domain protein 1 [Source:HGNC Symbol;Acc:HGNC:18402]
997	ENSG00000100393	EP300	-0.312704	-0.140979	-2.30692	0.027612	0.908208	0.847629	4 x 9	H	22 q13	E1A binding protein p300 [Source:HGNC Symbol;Acc:HGNC:3373]
998	ENSG00000013810	TACC3	0.584171	0.396133	2.30454	0.02763	0.908208	0.847666	40 x 26	A	4 p16	transforming acidic coiled-coil containing protein 3 [Source:HGNC Symbol;Acc:HGNC:11524]
999	ENSG00000181234	TMEM132C	-1.55558	-0.211384	-2.30429	0.0276475	0.908208	0.847702	31 x 3		12 q24	transmembrane protein 132C [Source:HGNC Symbol;Acc:HGNC:25436]
1000	ENSG00000133119	RFC3	0.636722	0.440247	2.30403	0.0276588	0.908208	0.847725	38 x 27	A	13 q13	replication factor C subunit 3 [Source:HGNC Symbol;Acc:HGNC:9971]
1001	ENSG00000116237	ICMT	0.416582	0.264797	2.30392	0.0276648	0.908208	0.847737	25 x 12		1 p36	isoprenylcysteine carboxyl methyltransferase [Source:HGNC Symbol;Acc:HGNC:5350]
1002	ENSG00000165724	ZMYND19	0.4482	0.288486	2.30807	0.0277262	0.908208	0.847862	40 x 34	A	9 q34	zinc finger MYND-type containing 19 [Source:HGNC Symbol;Acc:HGNC:21146]
1003	ENSG00000235241		0.841429	0.625435	2.30606	0.0277331	0.908208	0.847876	32 x 35		1 p36
1004	ENSG00000238249		0.313892	0.191355	2.31009	0.0277958	0.908208	0.848003	22 x 38		1 p36	high mobility group nucleosomal binding domain 2 pseudogene 17 [Source:HGNC Symbol;Acc:HGNC:39381]
1005	ENSG00000200394	SNORA38B	0.237937	0.140472	2.30145	0.0278261	0.908208	0.848064	12 x 16		17 q24	small nucleolar RNA, H/ACA box 38B [Source:HGNC Symbol;Acc:HGNC:33617]
1006	ENSG00000278421		-0.265192	-0.122751	-2.32117	0.0278516	0.908208	0.848116	11 x 18		X q13	FTX transcript, XIST regulator conserved region 1 [Source:RFAM;Acc:RF02119]
1007	ENSG00000255438		-0.38886	-0.167808	-2.32344	0.0279149	0.908208	0.848243	9 x 18		20 q13
1008	ENSG00000238058		0.321687	0.196742	2.32391	0.0279215	0.908208	0.848256	19 x 31		9 q34
1009	ENSG00000239510		0.267793	0.160124	2.30031	0.0279248	0.908208	0.848263	23 x 36		14 q23
1010	ENSG00000072864	NDE1	0.433627	0.277505	2.30065	0.0279269	0.908208	0.848267	26 x 17		16 p13	nudE neurodevelopment protein 1 [Source:HGNC Symbol;Acc:HGNC:17619]
1011	ENSG00000149256	TENM4	-0.805966	-0.262618	-2.29975	0.0279686	0.908208	0.848351	6 x 2		11 q14	teneurin transmembrane protein 4 [Source:HGNC Symbol;Acc:HGNC:29945]
1012	ENSG00000271499		-0.267927	-0.123832	-2.29927	0.0279982	0.908208	0.84841	9 x 10		19 p13
1013	ENSG00000215785		0.330344	0.202762	2.29842	0.0280189	0.908208	0.848451	11 x 32		1 p36	cofilin 1 pseudogene 6 [Source:HGNC Symbol;Acc:HGNC:34545]
1014	ENSG00000278520	MIR7851	-0.278714	-0.128055	-2.31054	0.0280653	0.908208	0.848543	12 x 15		12 q12	microRNA 7851 [Source:HGNC Symbol;Acc:HGNC:50127]
1015	ENSG00000279495		0.469155	0.304465	2.3001	0.0280745	0.908208	0.848562	10 x 19		14 q32
1016	ENSG00000039319	ZFYVE16	-0.275542	-0.126819	-2.29721	0.0280875	0.908208	0.848587	1 x 16	I	5 q14	zinc finger FYVE-type containing 16 [Source:HGNC Symbol;Acc:HGNC:20756]
1017	ENSG00000087269	NOP14	0.405067	0.256296	2.31947	0.0281091	0.908208	0.84863	25 x 15		4 p16	NOP14 nucleolar protein [Source:HGNC Symbol;Acc:HGNC:16821]
1018	ENSG00000018625	ATP1A2	-0.949187	-0.274837	-2.31486	0.0281418	0.908208	0.848695	11 x 1		1 q23	ATPase Na+/K+ transporting subunit alpha 2 [Source:HGNC Symbol;Acc:HGNC:800]
1019	ENSG00000255734		0.288653	0.174122	2.30366	0.0281771	0.908208	0.848764	24 x 37		12 p13	heterogeneous nuclear ribonucleoprotein A/B pseudogene 1 [Source:HGNC Symbol;Acc:HGNC:48744]
1020	ENSG00000236028		-0.775267	-0.258646	-2.31077	0.0282365	0.908208	0.848881	35 x 14		20 q13
1021	ENSG00000154175	ABI3BP	-1.04436	-0.277207	-2.2949	0.028248	0.908208	0.848904	13 x 1		3 q12	ABI family member 3 binding protein [Source:HGNC Symbol;Acc:HGNC:17265]
1022	ENSG00000137766	UNC13C	-0.425218	-0.179581	-2.29656	0.0283737	0.908208	0.84915	13 x 7		15 q21	unc-13 homolog C [Source:HGNC Symbol;Acc:HGNC:23149]
1023	ENSG00000243959		0.298955	0.181118	2.29831	0.0283752	0.908208	0.849153	15 x 19		5 q35	RNA, 7SL, cytoplasmic 684, pseudogene [Source:HGNC Symbol;Acc:HGNC:46700]
1024	ENSG00000152592	DMP1	-0.545086	-0.213647	-2.30261	0.0284015	0.908208	0.849204	25 x 33		4 q22	dentin matrix acidic phosphoprotein 1 [Source:HGNC Symbol;Acc:HGNC:2932]
1025	ENSG00000249721		-0.657012	-0.238882	-2.30243	0.0284236	0.908208	0.849247	25 x 30		5 q13
1026	ENSG00000120327	PCDHB14	-1.0224	-0.277068	-2.3087	0.0284532	0.908208	0.849304	8 x 3		5 q31	protocadherin beta 14 [Source:HGNC Symbol;Acc:HGNC:8685]
1027	ENSG00000158796	DEDD	-0.307985	-0.13922	-2.29878	0.0284764	0.908208	0.849349	35 x 32		1 q23	death effector domain containing [Source:HGNC Symbol;Acc:HGNC:2755]
1028	ENSG00000104848	KCNA7	0.292172	0.176506	2.31128	0.0284822	0.908208	0.84936	15 x 12		19 q13	potassium voltage-gated channel subfamily A member 7 [Source:HGNC Symbol;Acc:HGNC:6226]
1029	ENSG00000269873		0.417881	0.265761	2.30446	0.0285024	0.908208	0.849399	13 x 22		19 q13
1030	ENSG00000182400	TRAPPC6B	0.425349	0.271315	2.29049	0.028526	0.908208	0.849445	4 x 15		14 q21	trafficking protein particle complex 6B [Source:HGNC Symbol;Acc:HGNC:23066]
1031	ENSG00000233514		0.414589	0.263321	2.2954	0.0285623	0.908208	0.849514	27 x 36		1 p34
1032	ENSG00000279311		-0.311161	-0.140405	-2.29176	0.028601	0.908208	0.849589	8 x 9		3 q25
1033	ENSG00000168092	PAFAH1B2	-0.327	-0.146239	-2.33188	0.0286325	0.908208	0.849649	32 x 16		11 q23	platelet activating factor acetylhydrolase 1b catalytic subunit 2 [Source:HGNC Symbol;Acc:HGNC:8575]
1034	ENSG00000248668	OXCT1-AS1	0.49303	0.322942	2.28899	0.0286494	0.908208	0.849681	21 x 25		5 p13	OXCT1 antisense RNA 1 [Source:HGNC Symbol;Acc:HGNC:40423]
1035	ENSG00000164880	INTS1	-0.423424	-0.179016	-2.29298	0.0286972	0.908208	0.849773	21 x 18		7 p22	integrator complex subunit 1 [Source:HGNC Symbol;Acc:HGNC:24555]
1036	ENSG00000134365	CFHR4	-0.488592	-0.198499	-2.37448	0.0287566	0.908208	0.849886	26 x 32		1 q31	complement factor H related 4 [Source:HGNC Symbol;Acc:HGNC:16979]
1037	ENSG00000204711	C9orf135	0.977462	0.760243	2.29198	0.0287687	0.908208	0.849908	20 x 26		9 q21	chromosome 9 open reading frame 135 [Source:HGNC Symbol;Acc:HGNC:31422]
1038	ENSG00000114859	CLCN2	0.492611	0.322615	2.2908	0.0287797	0.908208	0.849929	21 x 19		3 q27	chloride voltage-gated channel 2 [Source:HGNC Symbol;Acc:HGNC:2020]
1039	ENSG00000196152	ZNF79	0.373179	0.233104	2.29066	0.028811	0.908208	0.849989	24 x 12		9 q33	zinc finger protein 79 [Source:HGNC Symbol;Acc:HGNC:13153]
1040	ENSG00000197713	RPE	0.305953	0.1859	2.29299	0.0288222	0.908208	0.85001	30 x 16		2 q34	ribulose-5-phosphate-3-epimerase [Source:HGNC Symbol;Acc:HGNC:10293]
1041	ENSG00000114200	BCHE	-1.23004	-0.268616	-2.28987	0.0288289	0.908208	0.850022	16 x 4		3 q26	butyrylcholinesterase [Source:HGNC Symbol;Acc:HGNC:983]
1042	ENSG00000203804	ADAMTSL4-AS1	-0.52192	-0.207631	-2.28616	0.0288343	0.908208	0.850033	11 x 22		1 q21	ADAMTSL4 antisense RNA 1 [Source:HGNC Symbol;Acc:HGNC:32041]
1043	ENSG00000280278	FLJ30679	0.270034	0.161617	2.28569	0.0288502	0.908208	0.850063	19 x 30		16 q24	uncharacterized protein FLJ30679 [Source:NCBI gene;Acc:146512]
1044	ENSG00000136933	RABEPK	0.442263	0.283999	2.28711	0.0288704	0.908208	0.850101	19 x 40		9 q33	Rab9 effector protein with kelch motifs [Source:HGNC Symbol;Acc:HGNC:16896]
1045	ENSG00000177685	CRACR2B	0.955109	0.737448	2.2854	0.0288814	0.908208	0.850121	40 x 40		11 p15	calcium release activated channel regulator 2B [Source:HGNC Symbol;Acc:HGNC:28703]
1046	ENSG00000237243		0.25286	0.150238	2.28772	0.028907	0.908208	0.85017	13 x 17		7 q33
1047	ENSG00000148343	MIGA2	0.41549	0.263988	2.28436	0.0289292	0.908208	0.850211	19 x 17		9 q34	mitoguardin 2 [Source:HGNC Symbol;Acc:HGNC:23621]
1048	ENSG00000230513	THAP7-AS1	0.742972	0.533715	2.2873	0.0289409	0.908208	0.850233	31 x 34		22 q11	THAP7 antisense RNA 1 [Source:HGNC Symbol;Acc:HGNC:41013]
1049	ENSG00000162430	SELENON	0.417076	0.265164	2.28363	0.0289702	0.908208	0.850288	22 x 12		1 p36	selenoprotein N [Source:HGNC Symbol;Acc:HGNC:15999]
1050	ENSG00000067177	PHKA1	0.554558	0.37189	2.29565	0.0289711	0.908208	0.85029	27 x 16		X q13	phosphorylase kinase regulatory subunit alpha 1 [Source:HGNC Symbol;Acc:HGNC:8925]
1051	ENSG00000228330		-0.334793	-0.149063	-2.31626	0.0289776	0.908208	0.850302	13 x 21		10 p13
1052	ENSG00000182768	NGRN	0.402608	0.254489	2.28464	0.0290184	0.908208	0.850378	21 x 34		15 q26	neugrin, neurite outgrowth associated [Source:HGNC Symbol;Acc:HGNC:18077]
1053	ENSG00000133477	FAM83F	1.61667	1.51926	2.30423	0.0290523	0.908208	0.850441	22 x 15		22 q13	family with sequence similarity 83 member F [Source:HGNC Symbol;Acc:HGNC:25148]
1054	ENSG00000224238		-0.280928	-0.128915	-2.28823	0.0290899	0.908208	0.850511	13 x 8		1 p12	WARS2 intronic transcript 1 [Source:HGNC Symbol;Acc:HGNC:41393]
1055	ENSG00000080845	DLGAP4	-0.283814	-0.130032	-2.28123	0.0291346	0.908208	0.850594	22 x 19		20 q11	DLG associated protein 4 [Source:HGNC Symbol;Acc:HGNC:24476]
1056	ENSG00000165966	PDZRN4	-0.684073	-0.24403	-2.3174	0.0291602	0.908208	0.850642	5 x 1		12 q12	PDZ domain containing ring finger 4 [Source:HGNC Symbol;Acc:HGNC:30552]
1057	ENSG00000134758	RNF138	0.414227	0.263053	2.28527	0.0291617	0.908208	0.850644	31 x 19		18 q12	ring finger protein 138 [Source:HGNC Symbol;Acc:HGNC:17765]
1058	ENSG00000082898	XPO1	0.272539	0.163289	2.28133	0.0291651	0.908208	0.850651	29 x 18		2 p15	exportin 1 [Source:HGNC Symbol;Acc:HGNC:12825]
1059	ENSG00000189431	RASSF10	-1.19513	-0.271565	-2.2797	0.0292501	0.908208	0.850807	1 x 23		11 p15	Ras association domain family member 10 [Source:HGNC Symbol;Acc:HGNC:33984]
1060	ENSG00000100413	POLR3H	-0.334995	-0.149136	-2.28257	0.0293132	0.908208	0.850923	21 x 14		22 q13	RNA polymerase III subunit H [Source:HGNC Symbol;Acc:HGNC:30349]
1061	ENSG00000013573	DDX11	0.429663	0.274537	2.28942	0.0294022	0.908208	0.851086	21 x 20		12 p11	DEAD/H-box helicase 11 [Source:HGNC Symbol;Acc:HGNC:2736]
1062	ENSG00000280916		0.522903	0.346468	2.27772	0.0294475	0.908208	0.851168	40 x 20	C	6 p25	FOXC1 upstream transcript (non-protein coding) [Source:HGNC Symbol;Acc:HGNC:50650]
1063	ENSG00000224682		0.678479	0.476298	2.3077	0.0294843	0.908208	0.851235	11 x 23		9 q34	suppressor of cytokine signaling 5 pseudogene 2 [Source:HGNC Symbol;Acc:HGNC:44598]
1064	ENSG00000259423		-0.41816	-0.177348	-2.28588	0.0294895	0.908208	0.851244	14 x 35		15 q14
1065	ENSG00000143153	ATP1B1	0.703848	0.498632	2.27804	0.0295135	0.908208	0.851288	9 x 36		1 q24	ATPase Na+/K+ transporting subunit beta 1 [Source:HGNC Symbol;Acc:HGNC:804]
1066	ENSG00000223804		-0.612406	-0.229586	-2.30759	0.0295554	0.908208	0.851363	21 x 29		1 p12
1067	ENSG00000164897	TMUB1	0.433238	0.277213	2.28954	0.0297557	0.908208	0.851722	40 x 39		7 q36	transmembrane and ubiquitin like domain containing 1 [Source:HGNC Symbol;Acc:HGNC:21709]
1068	ENSG00000275088		-0.247433	-0.115645	-2.28524	0.0297696	0.908208	0.851747	17 x 9		16 q24
1069	ENSG00000101040	ZMYND8	-0.346356	-0.153197	-2.27728	0.0297771	0.908208	0.85176	1 x 20		20 q13	zinc finger MYND-type containing 8 [Source:HGNC Symbol;Acc:HGNC:9397]
1070	ENSG00000225138		0.874502	0.657347	2.30235	0.0298176	0.908208	0.851832	7 x 27	J	5 p15	SLC9A3 antisense RNA 1 [Source:HGNC Symbol;Acc:HGNC:40550]
1071	ENSG00000225518		0.703591	0.498404	2.27093	0.0298327	0.908208	0.851859	33 x 34		1 q42	long intergenic non-protein coding RNA 1703 [Source:HGNC Symbol;Acc:HGNC:52491]
1072	ENSG00000273212		0.378713	0.237092	2.27043	0.0298486	0.908208	0.851887	16 x 29		22 q11
1073	ENSG00000148335	NTMT1	0.490876	0.321263	2.27147	0.0298573	0.908208	0.851902	40 x 35		9 q34	N-terminal Xaa-Pro-Lys N-methyltransferase 1 [Source:HGNC Symbol;Acc:HGNC:23373]
1074	ENSG00000101439	CST3	-0.439733	-0.184093	-2.27133	0.0299927	0.908208	0.852141	17 x 40		20 p11	cystatin C [Source:HGNC Symbol;Acc:HGNC:2475]
1075	ENSG00000151631		0.316589	0.193216	2.27229	0.0300949	0.908208	0.85232	34 x 20		10 p15	aldo-keto reductase family 1 member C6, pseudogene [Source:HGNC Symbol;Acc:HGNC:44680]
1076	ENSG00000226744		-0.302355	-0.137106	-2.26995	0.0301215	0.908208	0.852366	10 x 17		7 q21
1077	ENSG00000178773	CPNE7	1.19884	0.999672	2.27005	0.0301918	0.908208	0.852488	8 x 27	J	16 q24	copine 7 [Source:HGNC Symbol;Acc:HGNC:2320]
1078	ENSG00000157911	PEX10	0.52247	0.346124	2.2658	0.030196	0.908208	0.852495	22 x 15		1 p36	peroxisomal biogenesis factor 10 [Source:HGNC Symbol;Acc:HGNC:8851]
1079	ENSG00000149823	VPS51	-0.399675	-0.17138	-2.2646	0.0302386	0.908208	0.852569	21 x 16		11 q13	VPS51, GARP complex subunit [Source:HGNC Symbol;Acc:HGNC:1172]
1080	ENSG00000132305	IMMT	0.345818	0.213615	2.26795	0.0302597	0.908208	0.852605	27 x 17		2 p11	inner membrane mitochondrial protein [Source:HGNC Symbol;Acc:HGNC:6047]
1081	ENSG00000144214	LYG1	0.634273	0.43816	2.26778	0.0302676	0.908208	0.852619	11 x 27		2 q11	lysozyme g1 [Source:HGNC Symbol;Acc:HGNC:27014]
1082	ENSG00000177595	PIDD1	0.417927	0.265795	2.26496	0.030281	0.908208	0.852642	7 x 28		11 p15	p53-induced death domain protein 1 [Source:HGNC Symbol;Acc:HGNC:16491]
1083	ENSG00000179743	FLJ37453	0.532455	0.354086	2.29003	0.0303786	0.908208	0.85281	31 x 33		1 p36	uncharacterized LOC729614 [Source:NCBI gene;Acc:729614]
1084	ENSG00000124788	ATXN1	-0.440652	-0.184376	-2.26591	0.0304017	0.908208	0.852849	5 x 5	H	6 p22	ataxin 1 [Source:HGNC Symbol;Acc:HGNC:10548]
1085	ENSG00000224324		0.332731	0.204428	2.29484	0.0304251	0.908208	0.852889	14 x 15		7 q36	THAP domain containing 5 pseudogene 1 [Source:HGNC Symbol;Acc:HGNC:22340]
1086	ENSG00000231271		0.867469	0.650515	2.26129	0.0305193	0.908208	0.85305	17 x 36		22 q11
1087	ENSG00000237588		0.378845	0.237187	2.29148	0.0306379	0.908208	0.85325	9 x 30		1 q23
1088	ENSG00000261187		0.507774	0.334497	2.26392	0.0306719	0.908208	0.853307	9 x 30		15 q24
1089	ENSG00000108506	INTS2	0.416199	0.264514	2.26453	0.030728	0.908208	0.853402	1 x 15	I	17 q23	integrator complex subunit 2 [Source:HGNC Symbol;Acc:HGNC:29241]
1090	ENSG00000266877		-0.336168	-0.149559	-2.26456	0.030754	0.908208	0.853445	10 x 17		17 q11
1091	ENSG00000118322	ATP10B	1.20997	1.01237	2.25882	0.0307768	0.908208	0.853483	40 x 11	D	5 q34	ATPase phospholipid transporting 10B (putative) [Source:HGNC Symbol;Acc:HGNC:13543]
1092	ENSG00000136327	NKX2-8	1.14355	0.937547	2.25794	0.0308527	0.908208	0.85361	30 x 31		14 q13	NK2 homeobox 8 [Source:HGNC Symbol;Acc:HGNC:16364]
1093	ENSG00000270723		0.23395	0.137881	2.25768	0.0308942	0.908208	0.853679	9 x 14		2 p13	ribosomal protein L23a pseudogene 92 [Source:HGNC Symbol;Acc:HGNC:51627]
1094	ENSG00000080824	HSP90AA1	0.490258	0.320782	2.2572	0.0309081	0.908208	0.853702	28 x 15		14 q32	heat shock protein 90 alpha family class A member 1 [Source:HGNC Symbol;Acc:HGNC:5253]
1095	ENSG00000088970	KIZ	-0.429852	-0.181033	-2.25374	0.0309793	0.908208	0.853819	21 x 30		20 p11	kizuna centrosomal protein [Source:HGNC Symbol;Acc:HGNC:15865]
1096	ENSG00000247193	LOC439933	-0.357167	-0.157	-2.29545	0.03098	0.908208	0.853821	33 x 11		4 p14
1097	ENSG00000213397	HAUS7	0.47751	0.310898	2.26169	0.0309987	0.908208	0.853852	15 x 26		X q28	HAUS augmin like complex subunit 7 [Source:HGNC Symbol;Acc:HGNC:32979]
1098	ENSG00000170469	SPATA24	-0.600787	-0.226999	-2.26131	0.0310135	0.908208	0.853876	7 x 33		5 q31	spermatogenesis associated 24 [Source:HGNC Symbol;Acc:HGNC:27322]
1099	ENSG00000091527	CDV3	-0.327937	-0.14658	-2.27147	0.0310401	0.908208	0.85392	27 x 18		3 q22	CDV3 homolog [Source:HGNC Symbol;Acc:HGNC:26928]
1100	ENSG00000102145	GATA1	0.284418	0.171263	2.25343	0.0310515	0.908208	0.853938	13 x 11		X p11	GATA binding protein 1 [Source:HGNC Symbol;Acc:HGNC:4170]
1101	ENSG00000087085	ACHE	-0.788825	-0.26046	-2.25825	0.0310535	0.908208	0.853942	34 x 8		7 q22	acetylcholinesterase (Cartwright blood group) [Source:HGNC Symbol;Acc:HGNC:108]
1102	ENSG00000187726	DNAJB13	-0.932681	-0.273959	-2.26879	0.0310591	0.908208	0.853951	1 x 29		11 q13	DnaJ heat shock protein family (Hsp40) member B13 [Source:HGNC Symbol;Acc:HGNC:30718]
1103	ENSG00000201724		0.224242	0.131608	2.25196	0.0311422	0.908208	0.854087	12 x 13		15 q26	Y RNA [Source:RFAM;Acc:RF00019]
1104	ENSG00000227487		-0.43646	-0.183085	-2.25789	0.0311435	0.908208	0.854089	22 x 29		11 q23	NCAM1 antisense RNA1 [Source:HGNC Symbol;Acc:HGNC:48675]
1105	ENSG00000182481	KPNA2	0.577524	0.390652	2.26158	0.0311652	0.908208	0.854125	40 x 27	A	17 q24	karyopherin subunit alpha 2 [Source:HGNC Symbol;Acc:HGNC:6395]
1106	ENSG00000226087		0.34318	0.211757	2.25104	0.0311747	0.908208	0.85414	17 x 36		2 p21
1107	ENSG00000151503	NCAPD3	0.5123	0.338066	2.25069	0.0311995	0.908208	0.85418	26 x 18		11 q25	non-SMC condensin II complex subunit D3 [Source:HGNC Symbol;Acc:HGNC:28952]
1108	ENSG00000254479		0.275634	0.16536	2.2539	0.0312193	0.908208	0.854213	16 x 14		11 q14	solute carrier family 25 member 1 pseudogene 1 [Source:HGNC Symbol;Acc:HGNC:43845]
1109	ENSG00000169738	DCXR	0.589438	0.40049	2.25046	0.0312218	0.908208	0.854217	39 x 40		17 q25	dicarbonyl and L-xylulose reductase [Source:HGNC Symbol;Acc:HGNC:18985]
1110	ENSG00000107581	EIF3A	-0.382144	-0.165561	-2.25147	0.0312275	0.908208	0.854226	5 x 10		10 q26	eukaryotic translation initiation factor 3 subunit A [Source:HGNC Symbol;Acc:HGNC:3271]
1111	ENSG00000204173	LRRC37A5P	0.500649	0.328899	2.2498	0.0312611	0.908208	0.854281	17 x 40		9 q31	leucine rich repeat containing 37 member A5, pseudogene [Source:HGNC Symbol;Acc:HGNC:23369]
1112	ENSG00000151704	KCNJ1	0.513758	0.339218	2.27093	0.0312642	0.908208	0.854286	14 x 12		11 q24	potassium voltage-gated channel subfamily J member 1 [Source:HGNC Symbol;Acc:HGNC:6255]
1113	ENSG00000106537	TSPAN13	-0.737376	-0.253085	-2.25549	0.0312947	0.908208	0.854335	7 x 38	K	7 p21	tetraspanin 13 [Source:HGNC Symbol;Acc:HGNC:21643]
1114	ENSG00000260790		0.287144	0.173103	2.26415	0.03136	0.908208	0.854441	12 x 18		16 p12
1115	ENSG00000174282	ZBTB4	-0.48701	-0.198051	-2.24978	0.0313697	0.908208	0.854456	4 x 5	H	17 p13	zinc finger and BTB domain containing 4 [Source:HGNC Symbol;Acc:HGNC:23847]
1116	ENSG00000240204	SMKR1	0.805291	0.591199	2.2561	0.0313806	0.908208	0.854474	34 x 36		7 q32	small lysine rich protein 1 [Source:HGNC Symbol;Acc:HGNC:43561]
1117	ENSG00000260300		-0.335574	-0.149345	-2.24761	0.031406	0.908208	0.854515	12 x 33		16 q23
1118	ENSG00000165996	HACD1	0.994836	0.778136	2.24542	0.0316077	0.908208	0.854837	37 x 16		10 p12	3-hydroxyacyl-CoA dehydratase 1 [Source:HGNC Symbol;Acc:HGNC:9639]
1119	ENSG00000176884	GRIN1	1.01497	0.799058	2.24464	0.0316412	0.908208	0.854891	12 x 38		9 q34	glutamate ionotropic receptor NMDA type subunit 1 [Source:HGNC Symbol;Acc:HGNC:4584]
1120	ENSG00000196335	STK31	-0.990491	-0.27643	-2.2747	0.0316601	0.908208	0.85492	26 x 31		7 p15	serine/threonine kinase 31 [Source:HGNC Symbol;Acc:HGNC:11407]
1121	ENSG00000260954		-0.283159	-0.129779	-2.24386	0.0316765	0.908208	0.854946	9 x 16		16 p13
1122	ENSG00000274265		-0.660527	-0.239572	-2.24386	0.0316877	0.908208	0.854964	17 x 37		1 q21
1123	ENSG00000271815		-0.274621	-0.12646	-2.26104	0.0316965	0.908208	0.854978	14 x 33		5 q13
1124	ENSG00000250669		-0.688827	-0.244896	-2.25276	0.031703	0.908208	0.854988	25 x 31		5 q13
1125	ENSG00000161594	KLHL10	0.293356	0.177309	2.25916	0.0317176	0.908208	0.855011	18 x 33		17 q21	kelch like family member 10 [Source:HGNC Symbol;Acc:HGNC:18829]
1126	ENSG00000226562		0.450941	0.290564	2.28444	0.031719	0.908208	0.855014	22 x 34		9 p13	cytochrome P450 family 4 subfamily F member 26, pseudogene [Source:HGNC Symbol;Acc:HGNC:39948]
1127	ENSG00000187531	SIRT7	0.440124	0.282388	2.243	0.0317355	0.908208	0.85504	19 x 17		17 q25	sirtuin 7 [Source:HGNC Symbol;Acc:HGNC:14935]
1128	ENSG00000155324	GRAMD2B	-0.641111	-0.235684	-2.24459	0.0317703	0.908208	0.855094	38 x 13		5 q23	GRAM domain containing 2B [Source:HGNC Symbol;Acc:HGNC:24911]
1129	ENSG00000062822	POLD1	0.627507	0.43241	2.27266	0.0317936	0.908208	0.855131	21 x 18		19 q13	DNA polymerase delta 1, catalytic subunit [Source:HGNC Symbol;Acc:HGNC:9175]
1130	ENSG00000180229	HERC2P3	-0.966028	-0.275591	-2.30982	0.0318547	0.908208	0.855227	6 x 23		15 q11	hect domain and RLD 2 pseudogene 3 [Source:HGNC Symbol;Acc:HGNC:4871]
1131	ENSG00000260394	LOC105371184	0.476023	0.309751	2.25998	0.0319055	0.908208	0.855306	7 x 32		16 p13
1132	ENSG00000217733		0.221735	0.129996	2.26007	0.0319401	0.908208	0.85536	13 x 13		6 q25	chaperonin containing TCP1 subunit 7 pseudogene 1 [Source:HGNC Symbol;Acc:HGNC:35149]
1133	ENSG00000063761	ADCK1	0.576835	0.390086	2.27094	0.0320117	0.908208	0.855472	18 x 15		14 q24	aarF domain containing kinase 1 [Source:HGNC Symbol;Acc:HGNC:19038]
1134	ENSG00000174429	ABRA	-0.326308	-0.145987	-2.26935	0.0320124	0.908208	0.855473	16 x 30		8 q23	actin binding Rho activating protein [Source:HGNC Symbol;Acc:HGNC:30655]
1135	ENSG00000280116		0.305162	0.185358	2.24659	0.0320573	0.908208	0.855542	8 x 18		X p11
1136	ENSG00000162592	CCDC27	0.592731	0.403223	2.24538	0.0320767	0.908208	0.855572	25 x 23		1 p36	coiled-coil domain containing 27 [Source:HGNC Symbol;Acc:HGNC:26546]
1137	ENSG00000169231	THBS3	-0.503064	-0.202533	-2.23983	0.0321238	0.908208	0.855645	21 x 22		1 q22	thrombospondin 3 [Source:HGNC Symbol;Acc:HGNC:11787]
1138	ENSG00000228274		-0.543909	-0.213348	-2.23899	0.0321626	0.908208	0.855705	6 x 31		22 q13
1139	ENSG00000164402	2020-09-08	-0.48647	-0.197898	-2.23821	0.0321826	0.908208	0.855736	22 x 7		5 q31	septin 8 [Source:HGNC Symbol;Acc:HGNC:16511]
1140	ENSG00000276580	MIR8055	-0.26466	-0.122541	-2.24192	0.0322055	0.908208	0.855771	10 x 12		8 p23	microRNA 8055 [Source:HGNC Symbol;Acc:HGNC:50241]
1141	ENSG00000026025	VIM	-0.520724	-0.207313	-2.23607	0.0322267	0.908208	0.855803	18 x 4		10 p13	vimentin [Source:HGNC Symbol;Acc:HGNC:12692]
1142	ENSG00000258520		0.29309	0.177129	2.2562	0.0322688	0.908208	0.855868	8 x 14		14 q24
1143	ENSG00000131351	HAUS8	0.412662	0.261896	2.23544	0.0322759	0.908208	0.855879	37 x 27	A	19 p13	HAUS augmin like complex subunit 8 [Source:HGNC Symbol;Acc:HGNC:30532]
1144	ENSG00000245937	LINC01184	-0.49006	-0.198913	-2.23725	0.0322788	0.908208	0.855883	18 x 39		5 q23	long intergenic non-protein coding RNA 1184 [Source:HGNC Symbol;Acc:HGNC:49565]
1145	ENSG00000234835		0.182968	0.10547	2.23514	0.032297	0.908208	0.855911	19 x 33		13 q13	prohibitin pseudogene 13 [Source:HGNC Symbol;Acc:HGNC:39292]
1146	ENSG00000062524	LTK	0.816869	0.602096	2.25018	0.0323232	0.908208	0.855951	29 x 27		15 q15	leukocyte receptor tyrosine kinase [Source:HGNC Symbol;Acc:HGNC:6721]
1147	ENSG00000249485		0.380381	0.238297	2.24285	0.032377	0.908208	0.856032	27 x 17		5 p15	RB binding protein 4 pseudogene 1 [Source:HGNC Symbol;Acc:HGNC:42368]
1148	ENSG00000277692		-0.436753	-0.183176	-2.27487	0.0325242	0.908208	0.856255	13 x 28		20 q11
1149	ENSG00000251307		0.426484	0.272161	2.24936	0.0325505	0.908208	0.856295	4 x 40	K	5 q11
1150	ENSG00000143376	SNX27	-0.289097	-0.132065	-2.23118	0.032582	0.908208	0.856342	6 x 12		1 q21	sorting nexin family member 27 [Source:HGNC Symbol;Acc:HGNC:20073]
1151	ENSG00000155329	ZCCHC10	-0.328739	-0.146872	-2.23039	0.0326374	0.908208	0.856425	20 x 39		5 q31	zinc finger CCHC-type containing 10 [Source:HGNC Symbol;Acc:HGNC:25954]
1152	ENSG00000265943		0.426403	0.272101	2.2421	0.0326835	0.908208	0.856494	29 x 34		18 q11
1153	ENSG00000149294	NCAM1	-1.10038	-0.276456	-2.23203	0.0326974	0.908208	0.856515	10 x 3		11 q23	neural cell adhesion molecule 1 [Source:HGNC Symbol;Acc:HGNC:7656]
1154	ENSG00000267108		0.46277	0.299573	2.23254	0.0326985	0.908208	0.856516	12 x 25		18 p11
1155	ENSG00000153253	SCN3A	-0.601473	-0.227154	-2.22989	0.0327599	0.908208	0.856608	13 x 1		2 q24	sodium voltage-gated channel alpha subunit 3 [Source:HGNC Symbol;Acc:HGNC:10590]
1156	ENSG00000110060	PUS3	-0.489552	-0.19877	-2.24228	0.0327599	0.908208	0.856608	33 x 17		11 q24	pseudouridylate synthase 3 [Source:HGNC Symbol;Acc:HGNC:25461]
1157	ENSG00000189319	FAM53B	-0.495303	-0.200383	-2.22888	0.0328093	0.908208	0.856681	21 x 18		10 q26	family with sequence similarity 53 member B [Source:HGNC Symbol;Acc:HGNC:28968]
1158	ENSG00000224549		-0.415486	-0.176495	-2.30422	0.032844	0.908208	0.856732	13 x 14		9 p21
1159	ENSG00000204655	MOG	-0.33822	-0.150295	-2.28325	0.0328726	0.908208	0.856775	36 x 19		6 p22	myelin oligodendrocyte glycoprotein [Source:HGNC Symbol;Acc:HGNC:7197]
1160	ENSG00000090612	ZNF268	-0.388805	-0.16779	-2.22748	0.0329437	0.908208	0.856879	3 x 17		12 q24	zinc finger protein 268 [Source:HGNC Symbol;Acc:HGNC:13061]
1161	ENSG00000230650		0.581742	0.394127	2.22836	0.0329448	0.908208	0.856881	11 x 23		2 q13
1162	ENSG00000236528		0.316061	0.192851	2.2266	0.0329481	0.908208	0.856886	19 x 33		1 p36
1163	ENSG00000138768	USO1	0.347216	0.214602	2.22977	0.0329643	0.908208	0.85691	29 x 13		4 q21	USO1 vesicle transport factor [Source:HGNC Symbol;Acc:HGNC:30904]
1164	ENSG00000039600	SOX30	-0.59427	-0.225518	-2.22536	0.0330052	0.908208	0.85697	34 x 20		5 q33	SRY-box 30 [Source:HGNC Symbol;Acc:HGNC:30635]
1165	ENSG00000273293		0.352328	0.218218	2.22556	0.0330078	0.908208	0.856973	13 x 31		7 q36
1166	ENSG00000242020		-0.285441	-0.13066	-2.22767	0.0330137	0.908208	0.856982	13 x 19		5 q31	RNA, 7SL, cytoplasmic 68, pseudogene [Source:HGNC Symbol;Acc:HGNC:46084]
1167	ENSG00000138031	ADCY3	0.594789	0.404933	2.23135	0.0330203	0.908208	0.856992	8 x 9		2 p23	adenylate cyclase 3 [Source:HGNC Symbol;Acc:HGNC:234]
1168	ENSG00000165556	CDX2	0.332488	0.204258	2.22569	0.0330336	0.908208	0.857011	34 x 20		13 q12	caudal type homeobox 2 [Source:HGNC Symbol;Acc:HGNC:1806]
1169	ENSG00000205409	OR52E6	-0.20607	-0.0984724	-2.32979	0.0330532	0.908208	0.85704	24 x 33		11 p15	olfactory receptor family 52 subfamily E member 6 [Source:HGNC Symbol;Acc:HGNC:15215]
1170	ENSG00000259306		-0.640979	-0.235657	-2.24757	0.0331208	0.908208	0.857138	26 x 31		15 q21
1171	ENSG00000221845		0.448399	0.288637	2.22386	0.0331236	0.908208	0.857142	17 x 34		7 p12	chromosome 7 open reading frame 65 [Source:HGNC Symbol;Acc:HGNC:34432]
1172	ENSG00000249167		-0.329133	-0.147016	-2.25504	0.0331261	0.908208	0.857146	20 x 31		5 q23	SEMA6A antisense RNA 2 [Source:HGNC Symbol;Acc:HGNC:52754]
1173	ENSG00000236444		0.241782	0.142977	2.25016	0.0331289	0.908208	0.85715	25 x 35		13 q12	ubiquitin conjugating enzyme E2 L5, pseudogene [Source:HGNC Symbol;Acc:HGNC:13477]
1174	ENSG00000142606	MMEL1	0.813187	0.598623	2.22357	0.0331404	0.908208	0.857167	12 x 40	K	1 p36	membrane metalloendopeptidase like 1 [Source:HGNC Symbol;Acc:HGNC:14668]
1175	ENSG00000130779	CLIP1	-0.399236	-0.171236	-2.22909	0.033161	0.908208	0.857197	3 x 11	I	12 q24	CAP-Gly domain containing linker protein 1 [Source:HGNC Symbol;Acc:HGNC:10461]
1176	ENSG00000276831		0.46665	0.302543	2.2229	0.0332376	0.908208	0.857308	15 x 35		19 q13
1177	ENSG00000250470		0.776023	0.563957	2.22209	0.0332459	0.908208	0.85732	17 x 38		22 q11
1178	ENSG00000182923	CEP63	-0.323789	-0.145067	-2.22922	0.0332875	0.908208	0.85738	7 x 13		3 q22	centrosomal protein 63 [Source:HGNC Symbol;Acc:HGNC:25815]
1179	ENSG00000248740	LINC02428	-0.956416	-0.275178	-2.24739	0.0332905	0.908208	0.857384	26 x 31		4 q24	long intergenic non-protein coding RNA 2428 [Source:HGNC Symbol;Acc:HGNC:53359]
1180	ENSG00000230583	GTF2IRD1P1	0.354717	0.219912	2.22518	0.0333046	0.908208	0.857404	17 x 36		7 q11	GTF2I repeat domain containing 1 pseudogene 1 [Source:HGNC Symbol;Acc:HGNC:44136]
1181	ENSG00000039139	DNAH5	-0.684988	-0.244198	-2.22855	0.033382	0.908208	0.857516	4 x 40	K	5 p15	dynein axonemal heavy chain 5 [Source:HGNC Symbol;Acc:HGNC:2950]
1182	ENSG00000103018	CYB5B	0.322433	0.19726	2.2399	0.033431	0.908208	0.857586	32 x 15		16 q22	cytochrome b5 type B [Source:HGNC Symbol;Acc:HGNC:24374]
1183	ENSG00000276251		0.326002	0.199738	2.22109	0.03345	0.908208	0.857613	20 x 30		19 q12
1184	ENSG00000256862		-0.336697	-0.149749	-2.2441	0.0334577	0.908208	0.857624	13 x 11		12 p13
1185	ENSG00000273132		0.252313	0.149878	2.21922	0.0335092	0.908208	0.857697	36 x 16		6 q25
1186	ENSG00000075407	ZNF37A	-0.384734	-0.16643	-2.21894	0.0335193	0.908208	0.857712	5 x 19		10 p11	zinc finger protein 37A [Source:HGNC Symbol;Acc:HGNC:13102]
1187	ENSG00000226455		-0.229805	-0.108432	-2.23574	0.0335286	0.908208	0.857725	12 x 11		6 q15
1188	ENSG00000273950		0.229996	0.135321	2.22903	0.0335628	0.908208	0.857774	15 x 16		2 q14	Metazoan signal recognition particle RNA [Source:RFAM;Acc:RF00017]
1189	ENSG00000204661	C5orf60	0.411933	0.261357	2.21851	0.0335975	0.908208	0.857823	17 x 34		5 q35	chromosome 5 open reading frame 60 [Source:HGNC Symbol;Acc:HGNC:27753]
1190	ENSG00000271817		-0.294703	-0.134208	-2.22828	0.033774	0.908208	0.858072	8 x 17		4 q32	Small nucleolar RNA U3 [Source:RFAM;Acc:RF00012]
1191	ENSG00000230359	TPI1P2	0.338738	0.208634	2.21542	0.0338065	0.908208	0.858117	26 x 17		7 q32	triosephosphate isomerase 1 pseudogene 2 [Source:HGNC Symbol;Acc:HGNC:38069]
1192	ENSG00000279838		-0.664519	-0.240347	-2.21898	0.0338747	0.908208	0.858212	12 x 21		1 q25
1193	ENSG00000176542	USF3	-0.4192	-0.177679	-2.2198	0.0339107	0.908208	0.858263	4 x 8	H	3 q13	upstream transcription factor family member 3 [Source:HGNC Symbol;Acc:HGNC:30494]
1194	ENSG00000241973	PI4KA	0.436563	0.279708	2.24493	0.033916	0.908208	0.85827	1 x 8	H	22 q11	phosphatidylinositol 4-kinase alpha [Source:HGNC Symbol;Acc:HGNC:8983]
1195	ENSG00000184916	JAG2	0.67735	0.475312	2.2132	0.0339381	0.908208	0.858301	20 x 17		14 q32	jagged 2 [Source:HGNC Symbol;Acc:HGNC:6189]
1196	ENSG00000178028	DMAP1	-0.346358	-0.153198	-2.21806	0.0339414	0.908208	0.858305	19 x 19		1 p34	DNA methyltransferase 1 associated protein 1 [Source:HGNC Symbol;Acc:HGNC:18291]
1197	ENSG00000140374	ETFA	0.501742	0.329756	2.2135	0.0340188	0.908208	0.858413	32 x 14		15 q24	electron transfer flavoprotein alpha subunit [Source:HGNC Symbol;Acc:HGNC:3481]
1198	ENSG00000156136	DCK	0.456789	0.295009	2.21616	0.0340546	0.908208	0.858462	30 x 14		4 q13	deoxycytidine kinase [Source:HGNC Symbol;Acc:HGNC:2704]
1199	ENSG00000165626	BEND7	-0.554262	-0.215955	-2.21162	0.0341208	0.908208	0.858553	24 x 25		10 p13	BEN domain containing 7 [Source:HGNC Symbol;Acc:HGNC:23514]
1200	ENSG00000100307	CBX7	-0.447642	-0.186508	-2.21418	0.0341249	0.908208	0.858559	9 x 8		22 q13	chromobox 7 [Source:HGNC Symbol;Acc:HGNC:1557]
1201	ENSG00000165891	E2F7	0.609379	0.417119	2.22155	0.0341331	0.908208	0.85857	40 x 26	A	12 q21	E2F transcription factor 7 [Source:HGNC Symbol;Acc:HGNC:23820]
1202	ENSG00000277135		-0.264613	-0.122522	-2.21038	0.0342512	0.908208	0.858732	13 x 8		15 q26
1203	ENSG00000144645	OSBPL10	-0.669646	-0.241332	-2.21554	0.0342788	0.908208	0.85877	24 x 10		3 p22	oxysterol binding protein like 10 [Source:HGNC Symbol;Acc:HGNC:16395]
1204	ENSG00000157653	C9orf43	0.600758	0.409905	2.20656	0.0344357	0.908208	0.858983	18 x 37		9 q32	chromosome 9 open reading frame 43 [Source:HGNC Symbol;Acc:HGNC:23570]
1205	ENSG00000217385		0.205569	0.119677	2.20712	0.0344879	0.908208	0.859053	24 x 35		6 p25	proteasome 26S subunit, ATPase 1 pseudogene 11 [Source:HGNC Symbol;Acc:HGNC:39786]
1206	ENSG00000172869	DMXL1	-0.403942	-0.172773	-2.21712	0.0345111	0.908208	0.859084	1 x 15	I	5 q23	Dmx like 1 [Source:HGNC Symbol;Acc:HGNC:2937]
1207	ENSG00000272444		0.440548	0.282706	2.20628	0.0345115	0.908208	0.859085	8 x 31		14 q32
1208	ENSG00000252391		-0.29545	-0.134492	-2.24999	0.0345155	0.908208	0.85909	8 x 16		17 q25	RNA, U6 small nuclear 638, pseudogene [Source:HGNC Symbol;Acc:HGNC:47601]
1209	ENSG00000205250	E2F4	0.317264	0.193682	2.21106	0.0345206	0.908208	0.859097	21 x 20		16 q22	E2F transcription factor 4 [Source:HGNC Symbol;Acc:HGNC:3118]
1210	ENSG00000221926	TRIM16	-0.580298	-0.222271	-2.20506	0.0345325	0.908208	0.859113	38 x 16		17 p12	tripartite motif containing 16 [Source:HGNC Symbol;Acc:HGNC:17241]
1211	ENSG00000229863		0.245295	0.145273	2.20414	0.0346099	0.908208	0.859217	26 x 38		3 p14
1212	ENSG00000238363	SNORA13	-0.26255	-0.121704	-2.20547	0.0346191	0.908208	0.859229	12 x 18		5 q22	small nucleolar RNA, H/ACA box 13 [Source:HGNC Symbol;Acc:HGNC:32601]
1213	ENSG00000100201	DDX17	-0.343423	-0.152155	-2.21054	0.0346386	0.908208	0.859255	5 x 19		22 q13	DEAD-box helicase 17 [Source:HGNC Symbol;Acc:HGNC:2740]
1214	ENSG00000167513	CDT1	0.585057	0.396865	2.221	0.0346499	0.908208	0.859271	40 x 27	A	16 q24	chromatin licensing and DNA replication factor 1 [Source:HGNC Symbol;Acc:HGNC:24576]
1215	ENSG00000147256	ARHGAP36	0.725193	0.517676	2.21697	0.034675	0.908208	0.859304	1 x 34		X q26	Rho GTPase activating protein 36 [Source:HGNC Symbol;Acc:HGNC:26388]
1216	ENSG00000165568	AKR1E2	0.914305	0.696489	2.20597	0.0347006	0.908208	0.859338	34 x 24	B	10 p15	aldo-keto reductase family 1 member E2 [Source:HGNC Symbol;Acc:HGNC:23437]
1217	ENSG00000004777	ARHGAP33	0.695219	0.490999	2.22056	0.0347403	0.908208	0.859391	8 x 26	J	19 q13	Rho GTPase activating protein 33 [Source:HGNC Symbol;Acc:HGNC:23085]
1218	ENSG00000185662	SMIM23	0.337762	0.20795	2.20578	0.0347608	0.908208	0.859418	14 x 32		5 q35	small integral membrane protein 23 [Source:HGNC Symbol;Acc:HGNC:34440]
1219	ENSG00000169885	CALML6	0.569487	0.384056	2.20204	0.0347984	0.908208	0.859468	7 x 27	J	1 p36	calmodulin like 6 [Source:HGNC Symbol;Acc:HGNC:24193]
1220	ENSG00000224031		0.254508	0.151323	2.20129	0.0348417	0.908208	0.859526	9 x 16		X q22	TCEAL3 antisense RNA 1 [Source:HGNC Symbol;Acc:HGNC:41191]
1221	ENSG00000136937	NCBP1	0.464254	0.300708	2.20194	0.0348528	0.908208	0.85954	28 x 17		9 q22	nuclear cap binding protein subunit 1 [Source:HGNC Symbol;Acc:HGNC:7658]
1222	ENSG00000131591	C1orf159	0.47455	0.308615	2.20342	0.0348627	0.908208	0.859553	19 x 18		1 p36	chromosome 1 open reading frame 159 [Source:HGNC Symbol;Acc:HGNC:26062]
1223	ENSG00000166411	IDH3A	0.609773	0.41745	2.21225	0.0349056	0.908208	0.85961	27 x 13		15 q25	isocitrate dehydrogenase 3 (NAD(+)) alpha [Source:HGNC Symbol;Acc:HGNC:5384]
1224	ENSG00000114019	AMOTL2	-0.496203	-0.200634	-2.20353	0.0349657	0.908208	0.859689	8 x 5		3 q22	angiomotin like 2 [Source:HGNC Symbol;Acc:HGNC:17812]
1225	ENSG00000263563	UBBP4	0.536153	0.357047	2.19911	0.0349951	0.908208	0.859728	39 x 35		17 p11	ubiquitin B pseudogene 4 [Source:NCBI gene;Acc:23666]
1226	ENSG00000075420	FNDC3B	-0.357045	-0.156958	-2.23161	0.0350052	0.908208	0.859741	26 x 7		3 q26	fibronectin type III domain containing 3B [Source:HGNC Symbol;Acc:HGNC:24670]
1227	ENSG00000176399	DMRTA1	-1.00003	-0.276675	-2.20159	0.035052	0.908208	0.859802	34 x 22	B	9 p21	DMRT like family A1 [Source:HGNC Symbol;Acc:HGNC:13826]
1228	ENSG00000259125	LRP1-AS	-0.258028	-0.119904	-2.1994	0.035068	0.908208	0.859823	16 x 12		12 q13	LRP1 antisense RNA [Source:HGNC Symbol;Acc:HGNC:51694]
1229	ENSG00000214309	MBLAC1	0.427975	0.273274	2.19843	0.0350823	0.908208	0.859842	33 x 35		7 q22	metallo-beta-lactamase domain containing 1 [Source:HGNC Symbol;Acc:HGNC:22180]
1230	ENSG00000089685	BIRC5	0.617238	0.423727	2.19722	0.0351739	0.908208	0.859961	40 x 26	A	17 q25	baculoviral IAP repeat containing 5 [Source:HGNC Symbol;Acc:HGNC:593]
1231	ENSG00000163380	LMOD3	-0.32046	-0.143846	-2.196	0.0352544	0.908208	0.860065	15 x 32		3 p14	leiomodin 3 [Source:HGNC Symbol;Acc:HGNC:6649]
1232	ENSG00000136381	IREB2	0.384669	0.241401	2.19642	0.035273	0.908208	0.860089	2 x 11	I	15 q25	iron responsive element binding protein 2 [Source:HGNC Symbol;Acc:HGNC:6115]
1233	ENSG00000273295		1.18068	0.979101	2.20635	0.0352732	0.908208	0.86009	9 x 22		22 q11
1234	ENSG00000129595	EPB41L4A	-0.727774	-0.25156	-2.20204	0.0352907	0.908208	0.860112	3 x 6	H	5 q22	erythrocyte membrane protein band 4.1 like 4A [Source:HGNC Symbol;Acc:HGNC:13278]
1235	ENSG00000012963	UBR7	0.469914	0.305048	2.20314	0.0353005	0.908208	0.860125	2 x 13	I	14 q32	ubiquitin protein ligase E3 component n-recognin 7 (putative) [Source:HGNC Symbol;Acc:HGNC:20344]
1236	ENSG00000279827		0.258925	0.154239	2.21684	0.0353394	0.908208	0.860175	18 x 30		19 p13
1237	ENSG00000258870		0.268511	0.160602	2.19381	0.0354141	0.908208	0.860271	10 x 17		14 q11	eukaryotic translation initiation factor 4E binding protein 1 pseudogene 1 [Source:HGNC Symbol;Acc:HGNC:20160]
1238	ENSG00000260257		-0.569579	-0.219712	-2.20959	0.0354474	0.908208	0.860314	13 x 29		20 q11
1239	ENSG00000167117		0.283291	0.170503	2.20308	0.0354509	0.908208	0.860318	16 x 34		17 q21	long intergenic non-protein coding RNA 483 [Source:HGNC Symbol;Acc:HGNC:26080]
1240	ENSG00000239393		-0.314065	-0.141484	-2.19964	0.035462	0.908208	0.860332	27 x 36		5 q35
1241	ENSG00000236896		0.250488	0.148678	2.19666	0.0354715	0.908208	0.860344	9 x 16		9 q22
1242	ENSG00000085449	WDFY1	-0.330254	-0.147422	-2.19232	0.0355196	0.908208	0.860406	4 x 12		2 q36	WD repeat and FYVE domain containing 1 [Source:HGNC Symbol;Acc:HGNC:20451]
1243	ENSG00000165516	KLHDC2	0.391105	0.246078	2.20573	0.0355538	0.908208	0.860449	1 x 18		14 q21	kelch domain containing 2 [Source:HGNC Symbol;Acc:HGNC:20231]
1244	ENSG00000272370		-0.339302	-0.150683	-2.20109	0.0355703	0.908208	0.86047	14 x 33		5 q12
1245	ENSG00000261147		0.312627	0.190483	2.19596	0.035586	0.908208	0.86049	16 x 32		15 q26
1246	ENSG00000164588	HCN1	-0.409711	-0.174642	-2.19716	0.0356119	0.908208	0.860523	3 x 18		5 p12	hyperpolarization activated cyclic nucleotide gated potassium channel 1 [Source:HGNC Symbol;Acc:HGNC:4845]
1247	ENSG00000155034	FBXL18	-0.520463	-0.207244	-2.19128	0.0356123	0.908208	0.860524	23 x 19		7 p22	F-box and leucine rich repeat protein 18 [Source:HGNC Symbol;Acc:HGNC:21874]
1248	ENSG00000138867	GUCD1	0.363211	0.22596	2.19111	0.0356443	0.908208	0.860564	24 x 13		22 q11	guanylyl cyclase domain containing 1 [Source:HGNC Symbol;Acc:HGNC:14237]
1249	ENSG00000115211	EIF2B4	0.269595	0.161324	2.19036	0.0356802	0.908208	0.86061	34 x 32		2 p23	eukaryotic translation initiation factor 2B subunit delta [Source:HGNC Symbol;Acc:HGNC:3260]
1250	ENSG00000095139	ARCN1	-0.286381	-0.131022	-2.19923	0.0356932	0.908208	0.860626	26 x 11		11 q23	archain 1 [Source:HGNC Symbol;Acc:HGNC:649]
1251	ENSG00000152942	RAD17	-0.333404	-0.148562	-2.19097	0.0357052	0.908208	0.860641	1 x 17		5 q13	RAD17 checkpoint clamp loader component [Source:HGNC Symbol;Acc:HGNC:9807]
1252	ENSG00000105011	ASF1B	0.650213	0.451797	2.19055	0.0357251	0.908208	0.860666	40 x 26	A	19 p13	anti-silencing function 1B histone chaperone [Source:HGNC Symbol;Acc:HGNC:20996]
1253	ENSG00000145780	FEM1C	-0.465779	-0.191923	-2.20881	0.0357513	0.908208	0.860699	1 x 13	I	5 q22	fem-1 homolog C [Source:HGNC Symbol;Acc:HGNC:16933]
1254	ENSG00000228655		-0.313575	-0.141302	-2.23751	0.0357638	0.908208	0.860715	33 x 9		2 q22
1255	ENSG00000107882	SUFU	-0.42926	-0.180848	-2.18901	0.035777	0.908208	0.860732	6 x 7	H	10 q24	SUFU negative regulator of hedgehog signaling [Source:HGNC Symbol;Acc:HGNC:16466]
1256	ENSG00000135144	DTX1	-0.586937	-0.223826	-2.19211	0.0357948	0.908208	0.860754	11 x 2		12 q24	deltex E3 ubiquitin ligase 1 [Source:HGNC Symbol;Acc:HGNC:3060]
1257	ENSG00000166482	MFAP4	-1.19273	-0.271746	-2.19073	0.0357951	0.908208	0.860755	18 x 1	G	17 p11	microfibril associated protein 4 [Source:HGNC Symbol;Acc:HGNC:7035]
1258	ENSG00000207652	MIR621	0.399747	0.252391	2.20203	0.0358327	0.908208	0.860802	27 x 18		13 q14	microRNA 621 [Source:HGNC Symbol;Acc:HGNC:32877]
1259	ENSG00000185053	SGCZ	-0.268783	-0.124169	-2.22821	0.0358354	0.908208	0.860805	13 x 10		8 p22	sarcoglycan zeta [Source:HGNC Symbol;Acc:HGNC:14075]
1260	ENSG00000233017		0.615835	0.422546	2.19067	0.0358833	0.908208	0.860865	18 x 21		20 q13
1261	ENSG00000231086		0.281524	0.169314	2.19337	0.0359532	0.908208	0.860952	18 x 30		22 q11	testis specific serine kinase 1A, pseudogene [Source:HGNC Symbol;Acc:HGNC:11400]
1262	ENSG00000188403		-0.562832	-0.218072	-2.25545	0.0359952	0.908208	0.861005	35 x 6		15 q11	immunoglobulin heavy variable 1/OR15-9 (non-functional) [Source:HGNC Symbol;Acc:HGNC:5569]
1263	ENSG00000254101	LINC02055	-0.980259	-0.276116	-2.29355	0.0360151	0.908208	0.861029	26 x 32		8 q24	long intergenic non-protein coding RNA 2055 [Source:HGNC Symbol;Acc:HGNC:52895]
1264	ENSG00000250101		0.313939	0.191387	2.18809	0.0360167	0.908208	0.861031	12 x 34		5 q35
1265	ENSG00000149577	SIDT2	-0.443322	-0.185193	-2.18668	0.0360314	0.908208	0.86105	21 x 12		11 q23	SID1 transmembrane family member 2 [Source:HGNC Symbol;Acc:HGNC:24272]
1266	ENSG00000164123	C4orf45	-0.307582	-0.139069	-2.19438	0.0360703	0.908208	0.861098	21 x 27		4 q32	chromosome 4 open reading frame 45 [Source:HGNC Symbol;Acc:HGNC:26342]
1267	ENSG00000113212	PCDHB7	-1.22883	-0.268729	-2.20224	0.0360981	0.908208	0.861132	7 x 3		5 q31	protocadherin beta 7 [Source:HGNC Symbol;Acc:HGNC:8692]
1268	ENSG00000145990	GFOD1	-0.746625	-0.25451	-2.18348	0.0362196	0.908208	0.861282	38 x 11		6 p23	glucose-fructose oxidoreductase domain containing 1 [Source:HGNC Symbol;Acc:HGNC:21096]
1269	ENSG00000169006	NTSR2	0.809995	0.595618	2.18506	0.0362222	0.908208	0.861285	20 x 21		2 p25	neurotensin receptor 2 [Source:HGNC Symbol;Acc:HGNC:8040]
1270	ENSG00000130764	LRRC47	0.405725	0.25678	2.18751	0.0363062	0.908208	0.861388	22 x 18		1 p36	leucine rich repeat containing 47 [Source:HGNC Symbol;Acc:HGNC:29207]
1271	ENSG00000234771		0.771188	0.559498	2.1834	0.0363199	0.908208	0.861405	8 x 25	J	9 q34	SLC25A25 antisense RNA 1 [Source:HGNC Symbol;Acc:HGNC:27844]
1272	ENSG00000279949		0.309496	0.18833	2.18241	0.0363328	0.908208	0.861421	34 x 20		8 p23
1273	ENSG00000106031	HOXA13	0.442783	0.284392	2.19722	0.0363379	0.908208	0.861427	18 x 9		7 p15	homeobox A13 [Source:HGNC Symbol;Acc:HGNC:5102]
1274	ENSG00000270106		0.342068	0.210974	2.18364	0.0363403	0.908208	0.86143	11 x 12		1 q42	TSNAX-DISC1 readthrough (NMD candidate) [Source:HGNC Symbol;Acc:HGNC:49177]
1275	ENSG00000163364		-1.26598	-0.264936	-2.18216	0.0363837	0.908208	0.861483	14 x 38		2 q31	long intergenic non-protein coding RNA 1116 [Source:HGNC Symbol;Acc:HGNC:49259]
1276	ENSG00000204619	PPP1R11	-0.346295	-0.153175	-2.1871	0.0363932	0.908208	0.861494	21 x 39		6 p22	protein phosphatase 1 regulatory inhibitor subunit 11 [Source:HGNC Symbol;Acc:HGNC:9285]
1277	ENSG00000171246	NPTX1	-0.707198	-0.248135	-2.18459	0.0364493	0.908208	0.861563	14 x 6		17 q25	neuronal pentraxin 1 [Source:HGNC Symbol;Acc:HGNC:7952]
1278	ENSG00000273925		-0.271681	-0.125308	-2.19707	0.0364575	0.908208	0.861572	16 x 33		15 q21
1279	ENSG00000135617	PRADC1	0.464649	0.30101	2.18495	0.036471	0.908208	0.861589	38 x 37		2 p13	protease associated domain containing 1 [Source:HGNC Symbol;Acc:HGNC:16047]
1280	ENSG00000253111		0.328166	0.201243	2.17965	0.0365685	0.908208	0.861707	22 x 34		8 q24
1281	ENSG00000150459	SAP18	0.426321	0.27204	2.18234	0.0365947	0.908208	0.861738	36 x 36		13 q12	Sin3A associated protein 18 [Source:HGNC Symbol;Acc:HGNC:10530]
1282	ENSG00000138814	PPP3CA	-0.486815	-0.197996	-2.17971	0.0366217	0.908208	0.861771	24 x 8		4 q24	protein phosphatase 3 catalytic subunit alpha [Source:HGNC Symbol;Acc:HGNC:9314]
1283	ENSG00000254039		0.457724	0.295721	2.17964	0.0366564	0.908208	0.861813	15 x 34		17 q21
1284	ENSG00000279908		0.579273	0.392092	2.17873	0.0366609	0.908208	0.861818	14 x 37		5 p15
1285	ENSG00000226067		-0.654874	-0.23846	-2.18603	0.0366747	0.908208	0.861835	22 x 28		1 p11	long intergenic non-protein coding RNA 623 [Source:HGNC Symbol;Acc:HGNC:44252]
1286	ENSG00000040608	RTN4R	0.759967	0.549196	2.1782	0.0366761	0.908208	0.861836	32 x 29		22 q11	reticulon 4 receptor [Source:HGNC Symbol;Acc:HGNC:18601]
1287	ENSG00000128274	A4GALT	-0.666385	-0.240707	-2.18094	0.0366855	0.908208	0.861848	21 x 11		22 q13	alpha 1,4-galactosyltransferase (P blood group) [Source:HGNC Symbol;Acc:HGNC:18149]
1288	ENSG00000119640	ACYP1	0.551753	0.369617	2.17765	0.0367154	0.908208	0.861883	32 x 35		14 q24	acylphosphatase 1 [Source:HGNC Symbol;Acc:HGNC:179]
1289	ENSG00000253105	LOC102724804	-0.242625	-0.113693	-2.18896	0.0367472	0.908208	0.861921	16 x 10		8 q22
1290	ENSG00000231776		-0.797251	-0.261539	-2.23986	0.0367926	0.908208	0.861976	26 x 31		6 q14	long intergenic non-protein coding RNA 1611 [Source:HGNC Symbol;Acc:HGNC:51791]
1291	ENSG00000131831	RAI2	-0.727058	-0.251445	-2.18124	0.0368011	0.908208	0.861986	12 x 40	K	X p22	retinoic acid induced 2 [Source:HGNC Symbol;Acc:HGNC:9835]
1292	ENSG00000183935	HTR7P1	0.422189	0.268961	2.17903	0.0368138	0.908208	0.862001	1 x 3	H	12 p13	5-hydroxytryptamine receptor 7 pseudogene 1 [Source:HGNC Symbol;Acc:HGNC:30411]
1293	ENSG00000237223	SULT1C2P1	0.43801	0.280796	2.18299	0.0368224	0.908208	0.862011	23 x 30		2 q12	sulfotransferase family 1C member 2 pseudogene 1 [Source:HGNC Symbol;Acc:HGNC:33545]
1294	ENSG00000172236	TPSAB1	-1.30968	-0.259577	-2.23262	0.0368362	0.908208	0.862028	21 x 1	G	16 p13	tryptase alpha/beta 1 [Source:HGNC Symbol;Acc:HGNC:12019]
1295	ENSG00000129515	SNX6	0.330233	0.202684	2.17552	0.0368583	0.908208	0.862054	30 x 14		14 q13	sorting nexin 6 [Source:HGNC Symbol;Acc:HGNC:14970]
1296	ENSG00000189419		0.315849	0.192705	2.20259	0.0368615	0.908208	0.862058	5 x 34		15 q26	spermatogenesis associated 41 (non-protein coding) [Source:HGNC Symbol;Acc:HGNC:48613]
1297	ENSG00000223558		-0.271765	-0.125341	-2.18778	0.0368697	0.908208	0.862067	21 x 29		7 q11	tripartite motif containing 60 pseudogene 17 [Source:HGNC Symbol;Acc:HGNC:38489]
1298	ENSG00000178795	GDPD4	0.268425	0.160545	2.17608	0.0368848	0.908208	0.862085	13 x 13		11 q13	glycerophosphodiester phosphodiesterase domain containing 4 [Source:HGNC Symbol;Acc:HGNC:24849]
1299	ENSG00000214917		0.285807	0.1722	2.18928	0.0369274	0.908208	0.862136	25 x 40		18 q12
1300	ENSG00000198056	PRIM1	0.590062	0.401008	2.18211	0.0369483	0.908208	0.862161	39 x 28	A	12 q13	primase (DNA) subunit 1 [Source:HGNC Symbol;Acc:HGNC:9369]
1301	ENSG00000239569		0.678048	0.475921	2.17434	0.0369746	0.908208	0.862192	31 x 34		7 q22	KMT2E antisense RNA 1 (head to head) [Source:HGNC Symbol;Acc:HGNC:40845]
1302	ENSG00000268902	CSAG2	-0.908505	-0.272423	-2.25298	0.0370482	0.908208	0.862278	33 x 12		X q28	CSAG family member 2 [Source:HGNC Symbol;Acc:HGNC:16847]
1303	ENSG00000134001	EIF2S1	0.32561	0.199465	2.17685	0.0370576	0.908208	0.862289	29 x 15		14 q23	eukaryotic translation initiation factor 2 subunit alpha [Source:HGNC Symbol;Acc:HGNC:3265]
1304	ENSG00000239959		0.323371	0.197911	2.18955	0.0370718	0.908208	0.862306	16 x 22		3 p12	ectonucleotide pyrophosphatase/phosphodiesterase 7 pseudogene 2 [Source:HGNC Symbol;Acc:HGNC:48685]
1305	ENSG00000260924		0.525958	0.348899	2.17258	0.0370993	0.908208	0.862338	31 x 33		22 q11	long intergenic non-protein coding RNA 1311 [Source:HGNC Symbol;Acc:HGNC:50503]
1306	ENSG00000196781	TLE1	0.411397	0.260961	2.19848	0.0371045	0.908208	0.862345	40 x 21	C	9 q21	transducin like enhancer of split 1 [Source:HGNC Symbol;Acc:HGNC:11837]
1307	ENSG00000237125	HAND2-AS1	-0.702451	-0.247315	-2.20055	0.0371334	0.908208	0.862378	18 x 1	G	4 q34	HAND2 antisense RNA 1 (head to head) [Source:HGNC Symbol;Acc:HGNC:48872]
1308	ENSG00000255559	ZNF252P-AS1	0.727517	0.519764	2.17322	0.0371521	0.908208	0.8624	8 x 29		8 q24	ZNF252P antisense RNA 1 [Source:HGNC Symbol;Acc:HGNC:27821]
1309	ENSG00000234005		0.348548	0.215543	2.18202	0.0371649	0.908208	0.862415	18 x 33		13 q32	glyceraldehyde 3 phosphate dehydrogenase pseudogene 22 [Source:HGNC Symbol;Acc:HGNC:37774]
1310	ENSG00000114626	ABTB1	-0.427613	-0.180333	-2.17148	0.0372408	0.908208	0.862504	19 x 15		3 q21	ankyrin repeat and BTB domain containing 1 [Source:HGNC Symbol;Acc:HGNC:18275]
1311	ENSG00000183741	CBX6	-0.673838	-0.242127	-2.171	0.0372854	0.908208	0.862556	8 x 5		22 q13	chromobox 6 [Source:HGNC Symbol;Acc:HGNC:1556]
1312	ENSG00000073711	PPP2R3A	-0.416321	-0.176762	-2.17279	0.0372863	0.908208	0.862557	34 x 19		3 q22	protein phosphatase 2 regulatory subunit B''alpha [Source:HGNC Symbol;Acc:HGNC:9307]
1313	ENSG00000231064		-0.748165	-0.254743	-2.17339	0.0373263	0.908208	0.862603	2 x 29		1 q22
1314	ENSG00000105982	RNF32	0.470376	0.305403	2.17867	0.0373401	0.908208	0.862619	32 x 31		7 q36	ring finger protein 32 [Source:HGNC Symbol;Acc:HGNC:17118]
1315	ENSG00000279074		-0.237823	-0.111732	-2.18191	0.0373424	0.908208	0.862622	10 x 14		18 q12
1316	ENSG00000260686		-0.555548	-0.216275	-2.18136	0.0373543	0.908208	0.862636	3 x 31		5 q23
1317	ENSG00000198400	NTRK1	0.404452	0.255844	2.17213	0.0373878	0.908208	0.862675	18 x 8		1 q23	neurotrophic receptor tyrosine kinase 1 [Source:HGNC Symbol;Acc:HGNC:8031]
1318	ENSG00000156509	FBXO43	0.557912	0.374613	2.1693	0.0374211	0.908208	0.862713	39 x 28	A	8 q22	F-box protein 43 [Source:HGNC Symbol;Acc:HGNC:28521]
1319	ENSG00000185105	MYADML2	0.387029	0.243114	2.16924	0.0374552	0.908208	0.862753	17 x 15		17 q25	myeloid associated differentiation marker like 2 [Source:HGNC Symbol;Acc:HGNC:34548]
1320	ENSG00000275265		0.259355	0.154524	2.16956	0.0374668	0.908208	0.862766	18 x 32		12 q24
1321	ENSG00000153815	CMIP	-0.370461	-0.161596	-2.17402	0.0374797	0.908208	0.862781	23 x 10		16 q23	c-Maf inducing protein [Source:HGNC Symbol;Acc:HGNC:24319]
1322	ENSG00000214087	ARL16	0.529541	0.351757	2.18332	0.0374947	0.908208	0.862798	33 x 34		17 q25	ADP ribosylation factor like GTPase 16 [Source:HGNC Symbol;Acc:HGNC:27902]
1323	ENSG00000135346	CGA	0.183543	0.105829	2.18313	0.0374964	0.908208	0.8628	26 x 16		6 q14	glycoprotein hormones, alpha polypeptide [Source:HGNC Symbol;Acc:HGNC:1885]
1324	ENSG00000072501	SMC1A	0.466106	0.302126	2.17401	0.0375107	0.908208	0.862816	26 x 17		X p11	structural maintenance of chromosomes 1A [Source:HGNC Symbol;Acc:HGNC:11111]
1325	ENSG00000140479	PCSK6	1.10837	0.898828	2.16988	0.0375196	0.908208	0.862827	1 x 3	H	15 q26	proprotein convertase subtilisin/kexin type 6 [Source:HGNC Symbol;Acc:HGNC:8569]
1326	ENSG00000211952		-1.14897	-0.274516	-2.23273	0.0375611	0.908208	0.862874	40 x 1	E	14 q32	immunoglobulin heavy variable 4-28 [Source:HGNC Symbol;Acc:HGNC:5645]
1327	ENSG00000267712	LINC01539	-0.270363	-0.124791	-2.17544	0.0375703	0.908208	0.862885	14 x 12		18 q21	long intergenic non-protein coding RNA 1539 [Source:HGNC Symbol;Acc:HGNC:51307]
1328	ENSG00000182054	IDH2	0.578619	0.391554	2.16681	0.0375796	0.908208	0.862895	40 x 32	A	15 q26	isocitrate dehydrogenase (NADP(+)) 2, mitochondrial [Source:HGNC Symbol;Acc:HGNC:5383]
1329	ENSG00000022267	FHL1	-1.04767	-0.277207	-2.18256	0.0376157	0.908208	0.862937	12 x 2		X q26	four and a half LIM domains 1 [Source:HGNC Symbol;Acc:HGNC:3702]
1330	ENSG00000172795	DCP2	-0.341088	-0.151322	-2.18034	0.037627	0.908208	0.86295	4 x 16		5 q22	decapping mRNA 2 [Source:HGNC Symbol;Acc:HGNC:24452]
1331	ENSG00000272529		-0.406528	-0.173613	-2.16815	0.0376363	0.908208	0.86296	13 x 25		3 p24
1332	ENSG00000233246	LOC101929464	0.382094	0.239536	2.17274	0.0376423	0.908208	0.862967	19 x 28		1 p35
1333	ENSG00000231870		0.267011	0.159603	2.1742	0.037728	0.908208	0.863065	13 x 8		17 q11	keratin 17 pseudogene 3 [Source:HGNC Symbol;Acc:HGNC:33697]
1334	ENSG00000224316		0.427627	0.273015	2.17417	0.0377503	0.908208	0.86309	5 x 20		7 q11	general transcription factor IIi pseudogene 5 [Source:HGNC Symbol;Acc:HGNC:51717]
1335	ENSG00000091656	ZFHX4	-1.03008	-0.277144	-2.1652	0.0377559	0.908208	0.863097	20 x 1	G	8 q21	zinc finger homeobox 4 [Source:HGNC Symbol;Acc:HGNC:30939]
1336	ENSG00000231995		-0.328026	-0.146613	-2.17693	0.0377647	0.908208	0.863107	11 x 11		9 q13
1337	ENSG00000104901	DKKL1	0.680586	0.478141	2.16358	0.0378367	0.908208	0.863188	33 x 29		19 q13	dickkopf like acrosomal protein 1 [Source:HGNC Symbol;Acc:HGNC:16528]
1338	ENSG00000228236		0.33395	0.20528	2.19072	0.0378407	0.908208	0.863193	24 x 39		2 q23	thioredoxin pseudogene 5 [Source:HGNC Symbol;Acc:HGNC:49485]
1339	ENSG00000162571	TTLL10	0.75999	0.549218	2.16422	0.037851	0.908208	0.863204	18 x 23		1 p36	tubulin tyrosine ligase like 10 [Source:HGNC Symbol;Acc:HGNC:26693]
1340	ENSG00000243811	APOBEC3D	-0.731901	-0.252221	-2.16814	0.0378533	0.908208	0.863207	38 x 6	E	22 q13	apolipoprotein B mRNA editing enzyme catalytic subunit 3D [Source:HGNC Symbol;Acc:HGNC:17354]
1341	ENSG00000178162		0.897777	0.680138	2.16757	0.0378766	0.908208	0.863233	1 x 32		2 q21	fatty acyl-CoA reductase 2 pseudogene 2 [Source:HGNC Symbol;Acc:HGNC:49279]
1342	ENSG00000114786	ABHD14A-ACY1	0.287431	0.173297	2.1645	0.0378932	0.908208	0.863252	8 x 30		3 p21	ABHD14A-ACY1 readthrough [Source:HGNC Symbol;Acc:HGNC:38856]
1343	ENSG00000253603		-0.355537	-0.156431	-2.20164	0.0379219	0.908208	0.863284	20 x 33		8 q12	competing endogenous lncRNA 3 for miR-645 [Source:HGNC Symbol;Acc:HGNC:53469]
1344	ENSG00000198668	CALM1	0.337444	0.207727	2.16476	0.0379588	0.908208	0.863326	22 x 38		14 q32	calmodulin 1 [Source:HGNC Symbol;Acc:HGNC:1442]
1345	ENSG00000130382	MLLT1	-0.358073	-0.157316	-2.16691	0.0379788	0.908208	0.863348	20 x 17		19 p13	MLLT1, super elongation complex subunit [Source:HGNC Symbol;Acc:HGNC:7134]
1346	ENSG00000260806		0.657448	0.458031	2.16145	0.0380352	0.908208	0.863411	31 x 34		14 q32
1347	ENSG00000188501	LCTL	-0.472646	-0.19393	-2.17833	0.0380452	0.908208	0.863423	31 x 20		15 q22	lactase like [Source:HGNC Symbol;Acc:HGNC:15583]
1348	ENSG00000238072		0.48901	0.319811	2.17813	0.038048	0.908208	0.863426	23 x 38		7 q32
1349	ENSG00000242748		-0.276363	-0.12714	-2.16643	0.0380745	0.908208	0.863455	12 x 17		20 q12	ribosomal protein L23a pseudogene 81 [Source:HGNC Symbol;Acc:HGNC:36246]
1350	ENSG00000090263	MRPS33	0.492967	0.322893	2.16328	0.0380807	0.908208	0.863462	36 x 36		7 q34	mitochondrial ribosomal protein S33 [Source:HGNC Symbol;Acc:HGNC:16634]
1351	ENSG00000170145	SIK2	-0.464685	-0.191601	-2.16143	0.038126	0.908208	0.863513	7 x 7	H	11 q23	salt inducible kinase 2 [Source:HGNC Symbol;Acc:HGNC:21680]
1352	ENSG00000155011	DKK2	-0.739891	-0.253477	-2.16139	0.0381334	0.908208	0.863521	18 x 1	G	4 q25	dickkopf WNT signaling pathway inhibitor 2 [Source:HGNC Symbol;Acc:HGNC:2892]
1353	ENSG00000224032		-0.62229	-0.231733	-2.15961	0.0381732	0.908208	0.863565	32 x 40		5 q22	EPB41L4A antisense RNA 1 [Source:HGNC Symbol;Acc:HGNC:30749]
1354	ENSG00000169282	KCNAB1	-0.542186	-0.212909	-2.16865	0.038181	0.908208	0.863574	15 x 6		3 q25	potassium voltage-gated channel subfamily A member regulatory beta subunit 1 [Source:HGNC Symbol;Acc:HGNC:6228]
1355	ENSG00000181991	MRPS11	0.361658	0.224852	2.16032	0.038212	0.908208	0.863609	38 x 34		15 q25	mitochondrial ribosomal protein S11 [Source:HGNC Symbol;Acc:HGNC:14050]
1356	ENSG00000201746		0.279127	0.167703	2.16224	0.038217	0.908208	0.863614	9 x 15		1 p36	RNA, U6 small nuclear 828, pseudogene [Source:HGNC Symbol;Acc:HGNC:47791]
1357	ENSG00000126214	KLC1	0.415191	0.263767	2.17556	0.0382264	0.908208	0.863625	17 x 20		14 q32	kinesin light chain 1 [Source:HGNC Symbol;Acc:HGNC:6387]
1358	ENSG00000085433	WDR47	-0.370875	-0.161737	-2.17641	0.0382515	0.908208	0.863652	3 x 12	I	1 p13	WD repeat domain 47 [Source:HGNC Symbol;Acc:HGNC:29141]
1359	ENSG00000125485	DDX31	0.336484	0.207054	2.15856	0.0383079	0.908208	0.863715	26 x 17		9 q34	DEAD-box helicase 31 [Source:HGNC Symbol;Acc:HGNC:16715]
1360	ENSG00000166734	CASC4	-0.37184	-0.162067	-2.158	0.0383486	0.908208	0.86376	1 x 14	I	15 q15	cancer susceptibility 4 [Source:HGNC Symbol;Acc:HGNC:24892]
1361	ENSG00000164687	FABP5	0.71633	0.509741	2.15736	0.0383661	0.908208	0.863779	36 x 24	B	8 q21	fatty acid binding protein 5 [Source:HGNC Symbol;Acc:HGNC:3560]
1362	ENSG00000269275		0.394064	0.248236	2.15674	0.0384075	0.908208	0.863825	18 x 19		19 q13
1363	ENSG00000172828	CES3	1.09412	0.883322	2.16672	0.0384153	0.908208	0.863833	18 x 21		16 q22	carboxylesterase 3 [Source:HGNC Symbol;Acc:HGNC:1865]
1364	ENSG00000142609	CFAP74	0.705369	0.499982	2.15867	0.0384628	0.908208	0.863885	12 x 32		1 p36	cilia and flagella associated protein 74 [Source:HGNC Symbol;Acc:HGNC:29368]
1365	ENSG00000169951	ZNF764	0.332499	0.204266	2.18944	0.0384643	0.908208	0.863887	20 x 34		16 p11	zinc finger protein 764 [Source:HGNC Symbol;Acc:HGNC:28200]
1366	ENSG00000231551		-0.491107	-0.199208	-2.16428	0.0384713	0.908208	0.863895	1 x 26		1 q21
1367	ENSG00000254245	PCDHGA3	-0.713216	-0.249159	-2.22904	0.0385081	0.908208	0.863935	7 x 3		5 q31	protocadherin gamma subfamily A, 3 [Source:HGNC Symbol;Acc:HGNC:8701]
1368	ENSG00000252244		0.211988	0.123758	2.15591	0.0385157	0.908208	0.863943	11 x 14		6 q25	RNA, U7 small nuclear 3 pseudogene [Source:HGNC Symbol;Acc:HGNC:34099]
1369	ENSG00000225087		-0.779009	-0.259156	-2.22671	0.0385174	0.908208	0.863945	26 x 31		1 p31
1370	ENSG00000133624	ZNF767P	0.461397	0.298523	2.15628	0.038556	0.908208	0.863987	8 x 26	J	7 q36	zinc finger family member 767, pseudogene [Source:HGNC Symbol;Acc:HGNC:21884]
1371	ENSG00000243267		0.286019	0.172343	2.16593	0.0385834	0.908208	0.864017	10 x 18		1 p36	RNA, 7SL, cytoplasmic 614, pseudogene [Source:HGNC Symbol;Acc:HGNC:46630]
1372	ENSG00000160049	DFFA	0.430743	0.275344	2.16188	0.0386177	0.908208	0.864054	19 x 30		1 p36	DNA fragmentation factor subunit alpha [Source:HGNC Symbol;Acc:HGNC:2772]
1373	ENSG00000053702	NRIP2	-0.418739	-0.177532	-2.16759	0.0386431	0.908208	0.864082	10 x 5		12 p13	nuclear receptor interacting protein 2 [Source:HGNC Symbol;Acc:HGNC:23078]
1374	ENSG00000250208	FZD10-AS1	-1.20265	-0.270983	-2.16104	0.0386681	0.908208	0.864109	9 x 1		12 q24	FZD10 antisense RNA 1 (head to head) [Source:HGNC Symbol;Acc:HGNC:48632]
1375	ENSG00000100151	PICK1	-0.413988	-0.176016	-2.15363	0.0387475	0.908208	0.864195	20 x 16		22 q13	protein interacting with PRKCA 1 [Source:HGNC Symbol;Acc:HGNC:9394]
1376	ENSG00000262050	LOC105371592	0.406777	0.257554	2.15498	0.0387589	0.908208	0.864207	19 x 24		17 p13
1377	ENSG00000214429		-0.33624	-0.149584	-2.20599	0.0387612	0.908208	0.86421	26 x 32		2 p12	cytochrome c, somatic pseudogene 6 [Source:HGNC Symbol;Acc:HGNC:24421]
1378	ENSG00000151665	PIGF	0.354652	0.219866	2.15376	0.0387836	0.908208	0.864234	21 x 38		2 p21	phosphatidylinositol glycan anchor biosynthesis class F [Source:HGNC Symbol;Acc:HGNC:8962]
1379	ENSG00000237359		-0.561218	-0.217676	-2.18717	0.0388267	0.908208	0.864281	15 x 30		9 p24
1380	ENSG00000033050	ABCF2	0.372765	0.232806	2.17299	0.038842	0.908208	0.864297	26 x 17		7 q36	ATP binding cassette subfamily F member 2 [Source:HGNC Symbol;Acc:HGNC:71]
1381	ENSG00000251393		0.245148	0.145177	2.15175	0.0389252	0.908208	0.864386	20 x 33		14 q24
1382	ENSG00000007372	PAX6	1.24724	1.05534	2.15759	0.0390438	0.908208	0.864513	35 x 19		11 p13	paired box 6 [Source:HGNC Symbol;Acc:HGNC:8620]
1383	ENSG00000090266	NDUFB2	0.492045	0.322174	2.15782	0.0390474	0.908208	0.864517	37 x 38		7 q34	NADH:ubiquinone oxidoreductase subunit B2 [Source:HGNC Symbol;Acc:HGNC:7697]
1384	ENSG00000180806	HOXC9	0.905697	0.687955	2.17309	0.039177	0.908208	0.864655	20 x 9		12 q13	homeobox C9 [Source:HGNC Symbol;Acc:HGNC:5130]
1385	ENSG00000100478	AP4S1	0.602254	0.411154	2.15091	0.0391782	0.908208	0.864656	19 x 36		14 q12	adaptor related protein complex 4 sigma 1 subunit [Source:HGNC Symbol;Acc:HGNC:575]
1386	ENSG00000069020	MAST4	-0.710125	-0.248636	-2.18734	0.0392068	0.908208	0.864686	2 x 5	H	5 q12	microtubule associated serine/threonine kinase family member 4 [Source:HGNC Symbol;Acc:HGNC:19037]
1387	ENSG00000143437	ARNT	-0.33652	-0.149685	-2.15778	0.0392385	0.908208	0.86472	6 x 11		1 q21	aryl hydrocarbon receptor nuclear translocator [Source:HGNC Symbol;Acc:HGNC:700]
1388	ENSG00000175318	GRAMD2A	0.814476	0.599838	2.14686	0.0392478	0.908208	0.864729	39 x 14	E	15 q23	GRAM domain containing 2A [Source:HGNC Symbol;Acc:HGNC:27287]
1389	ENSG00000196993	NPIPB9	0.333004	0.204619	2.15801	0.0392522	0.908208	0.864734	19 x 30		16 p11	nuclear pore complex interacting protein family member B9 [Source:HGNC Symbol;Acc:HGNC:41987]
1390	ENSG00000261167		-0.408914	-0.174385	-2.14766	0.0392575	0.908208	0.864739	1 x 19		3 q22
1391	ENSG00000143921	ABCG8	0.918018	0.700181	2.14722	0.0392596	0.908208	0.864742	21 x 29		2 p21	ATP binding cassette subfamily G member 8 [Source:HGNC Symbol;Acc:HGNC:13887]
1392	ENSG00000119705	SLIRP	0.467185	0.302954	2.15008	0.0392654	0.908208	0.864748	36 x 38		14 q24	SRA stem-loop interacting RNA binding protein [Source:HGNC Symbol;Acc:HGNC:20495]
1393	ENSG00000169718	DUS1L	0.452162	0.29149	2.15087	0.0392685	0.908208	0.864751	40 x 36		17 q25	dihydrouridine synthase 1 like [Source:HGNC Symbol;Acc:HGNC:30086]
1394	ENSG00000146530	VWDE	-1.14047	-0.274942	-2.1531	0.0392711	0.908208	0.864754	22 x 25		7 p21	von Willebrand factor D and EGF domains [Source:HGNC Symbol;Acc:HGNC:21897]
1395	ENSG00000280206		0.668219	0.467358	2.1459	0.0393321	0.908208	0.864818	36 x 28		16 p13
1396	ENSG00000185640	KRT79	0.432933	0.276984	2.19444	0.0393381	0.908208	0.864824	38 x 18	C	12 q13	keratin 79 [Source:HGNC Symbol;Acc:HGNC:28930]
1397	ENSG00000280195		0.310603	0.189091	2.15158	0.039346	0.908208	0.864833	17 x 20		X q28
1398	ENSG00000211611		-1.06846	-0.277079	-2.18787	0.0393871	0.908208	0.864876	40 x 1	E	2 p11	immunoglobulin kappa variable 6-21 (non-functional) [Source:HGNC Symbol;Acc:HGNC:5836]
1399	ENSG00000258571		0.233248	0.137426	2.14864	0.0394781	0.908208	0.864971	9 x 16		14 q24	pituitary tumor-transforming 4 pseudogene [Source:HGNC Symbol;Acc:HGNC:20055]
1400	ENSG00000169314	C22orf15	0.671358	0.470088	2.17089	0.0395336	0.908208	0.865029	17 x 22		22 q11	chromosome 22 open reading frame 15 [Source:HGNC Symbol;Acc:HGNC:15558]
1401	ENSG00000064666	CNN2	-0.671847	-0.24175	-2.16069	0.0395776	0.908208	0.865074	26 x 1	G	19 p13	calponin 2 [Source:HGNC Symbol;Acc:HGNC:2156]
1402	ENSG00000174306	ZHX3	-0.533731	-0.210732	-2.16872	0.0395958	0.908208	0.865093	4 x 5	H	20 q12	zinc fingers and homeoboxes 3 [Source:HGNC Symbol;Acc:HGNC:15935]
1403	ENSG00000234819		0.27785	0.166845	2.14396	0.039597	0.908208	0.865095	23 x 36		9 q21
1404	ENSG00000169972	PUSL1	0.613163	0.420297	2.14831	0.0396124	0.908208	0.86511	40 x 36		1 p36	pseudouridylate synthase-like 1 [Source:HGNC Symbol;Acc:HGNC:26914]
1405	ENSG00000196628	TCF4	-0.530298	-0.209838	-2.15466	0.0397094	0.908208	0.865211	19 x 4		18 q21	transcription factor 4 [Source:HGNC Symbol;Acc:HGNC:11634]
1406	ENSG00000132300	PTCD3	0.319908	0.19551	2.14867	0.0397122	0.908208	0.865214	29 x 19		2 p11	pentatricopeptide repeat domain 3 [Source:HGNC Symbol;Acc:HGNC:24717]
1407	ENSG00000277241		0.369826	0.230695	2.14381	0.0397332	0.908208	0.865235	25 x 11		3 q26
1408	ENSG00000143994	ABHD1	0.739354	0.530439	2.1418	0.0397421	0.908208	0.865244	4 x 32		2 p23	abhydrolase domain containing 1 [Source:HGNC Symbol;Acc:HGNC:17553]
1409	ENSG00000009950	MLXIPL	1.14448	0.938586	2.141	0.0397563	0.908208	0.865259	5 x 28		7 q11	MLX interacting protein like [Source:HGNC Symbol;Acc:HGNC:12744]
1410	ENSG00000138757	G3BP2	0.367396	0.228953	2.1418	0.0397575	0.908208	0.86526	1 x 11	I	4 q21	G3BP stress granule assembly factor 2 [Source:HGNC Symbol;Acc:HGNC:30291]
1411	ENSG00000251141		-0.626475	-0.232627	-2.15492	0.0397777	0.908208	0.865281	5 x 33		5 p12
1412	ENSG00000225472		0.759504	0.548773	2.18931	0.0398232	0.908208	0.865328	37 x 21	C	9 p22
1413	ENSG00000176381	PRR18	0.944225	0.726439	2.14687	0.0398301	0.908208	0.865335	33 x 25	B	6 q27	proline rich 18 [Source:HGNC Symbol;Acc:HGNC:28574]
1414	ENSG00000261286	ATP2C2-AS1	0.61286	0.420043	2.1538	0.0398348	0.908208	0.86534	17 x 22		16 q24	ATP2C2 antisense RNA 1 [Source:HGNC Symbol;Acc:HGNC:53167]
1415	ENSG00000103510	KAT8	0.349974	0.216551	2.15268	0.0398401	0.908208	0.865345	7 x 32		16 p11	lysine acetyltransferase 8 [Source:HGNC Symbol;Acc:HGNC:17933]
1416	ENSG00000124212	PTGIS	-1.06661	-0.277099	-2.14484	0.0398524	0.908208	0.865358	16 x 1	G	20 q13	prostaglandin I2 synthase [Source:HGNC Symbol;Acc:HGNC:9603]
1417	ENSG00000164338	UTP15	-0.27437	-0.126362	-2.14463	0.0398579	0.908208	0.865363	1 x 15	I	5 q13	UTP15, small subunit processome component [Source:HGNC Symbol;Acc:HGNC:25758]
1418	ENSG00000185015	CA13	-0.499492	-0.201547	-2.14964	0.0398876	0.908208	0.865394	38 x 16		8 q21	carbonic anhydrase 13 [Source:HGNC Symbol;Acc:HGNC:14914]
1419	ENSG00000230667	SETSIP	0.263604	0.157339	2.14359	0.039903	0.908208	0.86541	26 x 12		1 p22	SET-like protein [Source:HGNC Symbol;Acc:HGNC:42937]
1420	ENSG00000151892	GFRA1	-1.18825	-0.272074	-2.13859	0.0399633	0.908208	0.865471	2 x 1		10 q25	GDNF family receptor alpha 1 [Source:HGNC Symbol;Acc:HGNC:4243]
1421	ENSG00000172458	IL17D	0.491895	0.322057	2.13906	0.040006	0.908208	0.865515	15 x 7		13 q12	interleukin 17D [Source:HGNC Symbol;Acc:HGNC:5984]
1422	ENSG00000022976	ZNF839	0.475266	0.309167	2.13816	0.0400314	0.908208	0.86554	4 x 22		14 q32	zinc finger protein 839 [Source:HGNC Symbol;Acc:HGNC:20345]
1423	ENSG00000168237	GLYCTK	-0.638963	-0.235242	-2.13777	0.0400419	0.908208	0.865551	18 x 15		3 p21	glycerate kinase [Source:HGNC Symbol;Acc:HGNC:24247]
1424	ENSG00000169609	C15orf40	0.437862	0.280685	2.13812	0.0400509	0.908208	0.86556	9 x 32		15 q25	chromosome 15 open reading frame 40 [Source:HGNC Symbol;Acc:HGNC:28443]
1425	ENSG00000157916	RER1	0.430481	0.275148	2.14169	0.040065	0.908208	0.865574	18 x 38		1 p36	retention in endoplasmic reticulum sorting receptor 1 [Source:HGNC Symbol;Acc:HGNC:30309]
1426	ENSG00000138769	CDKL2	0.669486	0.46846	2.14789	0.0401112	0.908208	0.865621	25 x 29		4 q21	cyclin dependent kinase like 2 [Source:HGNC Symbol;Acc:HGNC:1782]
1427	ENSG00000268401		0.347176	0.214574	2.1376	0.0401379	0.908208	0.865648	15 x 20		19 q13
1428	ENSG00000174015	SPERT	-0.747966	-0.254713	-2.14917	0.0401384	0.908208	0.865649	25 x 30		13 q14	spermatid associated [Source:HGNC Symbol;Acc:HGNC:30720]
1429	ENSG00000107249	GLIS3	-0.923235	-0.273394	-2.13744	0.040156	0.908208	0.865667	6 x 4		9 p24	GLIS family zinc finger 3 [Source:HGNC Symbol;Acc:HGNC:28510]
1430	ENSG00000182022	CHST15	-0.695448	-0.246083	-2.13879	0.0401863	0.908208	0.865697	3 x 3	H	10 q26	carbohydrate sulfotransferase 15 [Source:HGNC Symbol;Acc:HGNC:18137]
1431	ENSG00000166275	BORCS7	-0.433399	-0.182138	-2.13786	0.0402077	0.908208	0.865719	6 x 36		10 q24	BLOC-1 related complex subunit 7 [Source:HGNC Symbol;Acc:HGNC:23516]
1432	ENSG00000184925	LCN12	1.08606	0.874594	2.14639	0.0402312	0.908208	0.865742	5 x 28		9 q34	lipocalin 12 [Source:HGNC Symbol;Acc:HGNC:28733]
1433	ENSG00000115525	ST3GAL5	-0.570187	-0.219859	-2.13796	0.0402332	0.908208	0.865744	18 x 8		2 p11	ST3 beta-galactoside alpha-2,3-sialyltransferase 5 [Source:HGNC Symbol;Acc:HGNC:10872]
1434	ENSG00000196337	CGB7	0.504964	0.332286	2.13596	0.0402475	0.908208	0.865759	13 x 9		19 q13	chorionic gonadotropin beta subunit 7 [Source:HGNC Symbol;Acc:HGNC:16451]
1435	ENSG00000133059	DSTYK	-0.356032	-0.156604	-2.13925	0.0402532	0.908208	0.865765	6 x 12		1 q32	dual serine/threonine and tyrosine protein kinase [Source:HGNC Symbol;Acc:HGNC:29043]
1436	ENSG00000249364	LOC101928858	-0.443204	-0.185157	-2.15883	0.0402536	0.908208	0.865765	5 x 35		5 q12
1437	ENSG00000260992		0.652982	0.45418	2.14173	0.0402974	0.908208	0.865809	19 x 26		13 q32	DOCK9 antisense RNA 2 (head to head) [Source:HGNC Symbol;Acc:HGNC:43696]
1438	ENSG00000126653	NSRP1	-0.365203	-0.159789	-2.13477	0.0403473	0.908208	0.865859	13 x 34		17 q11	nuclear speckle splicing regulatory protein 1 [Source:HGNC Symbol;Acc:HGNC:25305]
1439	ENSG00000123838	C4BPA	1.04411	0.829711	2.14474	0.0403921	0.908208	0.865904	38 x 19	C	1 q32	complement component 4 binding protein alpha [Source:HGNC Symbol;Acc:HGNC:1325]
1440	ENSG00000188976	NOC2L	0.48485	0.316579	2.14387	0.0404273	0.908208	0.865939	21 x 18		1 p36	NOC2 like nucleolar associated transcriptional repressor [Source:HGNC Symbol;Acc:HGNC:24517]
1441	ENSG00000099866	MADCAM1	0.543525	0.362972	2.14657	0.0404498	0.908208	0.865961	8 x 30		19 p13	mucosal vascular addressin cell adhesion molecule 1 [Source:HGNC Symbol;Acc:HGNC:6765]
1442	ENSG00000255120	OVOL1-AS1	0.377683	0.236349	2.133	0.0404746	0.908208	0.865986	15 x 34		11 q13	OVOL1 antisense RNA 1 [Source:HGNC Symbol;Acc:HGNC:49319]
1443	ENSG00000185043	CIB1	0.55403	0.371462	2.13897	0.0404972	0.908208	0.866008	39 x 39		15 q26	calcium and integrin binding 1 [Source:HGNC Symbol;Acc:HGNC:16920]
1444	ENSG00000259469		-0.207023	-0.0988781	-2.14503	0.0404992	0.908208	0.86601	16 x 31		15 q21
1445	ENSG00000163785	RYK	-0.308588	-0.139445	-2.14091	0.0405556	0.908208	0.866066	31 x 19		3 q22	receptor-like tyrosine kinase [Source:HGNC Symbol;Acc:HGNC:10481]
1446	ENSG00000260430		0.309283	0.188184	2.13245	0.040604	0.908208	0.866114	21 x 35		16 p12
1447	ENSG00000267547		-0.440835	-0.184432	-2.13232	0.0406485	0.908208	0.866158	15 x 29		17 q12
1448	ENSG00000126005		-0.603861	-0.22769	-2.14428	0.040683	0.908208	0.866192	38 x 40		20 q11	MMP24 antisense RNA 1 [Source:HGNC Symbol;Acc:HGNC:44421]
1449	ENSG00000115841	RMDN2	-0.363947	-0.159355	-2.14977	0.0407598	0.908208	0.866268	13 x 10		2 p22	regulator of microtubule dynamics 2 [Source:HGNC Symbol;Acc:HGNC:26567]
1450	ENSG00000171102	OBP2B	1.2183	1.02192	2.13442	0.0407755	0.908208	0.866283	39 x 14	E	9 q34	odorant binding protein 2B [Source:HGNC Symbol;Acc:HGNC:23381]
1451	ENSG00000229393		0.276528	0.165959	2.13428	0.0408042	0.908208	0.866311	16 x 16		1 p36
1452	ENSG00000242611		-0.387958	-0.167508	-2.13742	0.0408355	0.908208	0.866342	11 x 8		7 p22
1453	ENSG00000108883	EFTUD2	0.397417	0.250685	2.13859	0.0409266	0.908208	0.866431	26 x 16		17 q21	elongation factor Tu GTP binding domain containing 2 [Source:HGNC Symbol;Acc:HGNC:30858]
1454	ENSG00000168067	MAP4K2	-0.385137	-0.166565	-2.13182	0.0409317	0.908208	0.866436	22 x 20		11 q13	mitogen-activated protein kinase kinase kinase kinase 2 [Source:HGNC Symbol;Acc:HGNC:6864]
1455	ENSG00000185129	PURA	-0.332595	-0.14827	-2.15293	0.0409945	0.908208	0.866497	2 x 14	I	5 q31	purine rich element binding protein A [Source:HGNC Symbol;Acc:HGNC:9701]
1456	ENSG00000134438	RAX	0.352179	0.218113	2.14942	0.0409958	0.908208	0.866498	31 x 21		18 q21	retina and anterior neural fold homeobox [Source:HGNC Symbol;Acc:HGNC:18662]
1457	ENSG00000198870	STKLD1	0.462566	0.299417	2.14075	0.0411891	0.908208	0.866685	6 x 30		9 q34	serine/threonine kinase like domain containing 1 [Source:HGNC Symbol;Acc:HGNC:28669]
1458	ENSG00000121552	CSTA	-0.827545	-0.265125	-2.14123	0.0412164	0.908208	0.866711	39 x 8	D	3 q21	cystatin A [Source:HGNC Symbol;Acc:HGNC:2481]
1459	ENSG00000279348		-0.597857	-0.226336	-2.12724	0.0412672	0.908208	0.86676	5 x 4		2 q35
1460	ENSG00000109794	FAM149A	-0.703998	-0.247584	-2.1349	0.0412919	0.908208	0.866783	12 x 8		4 q35	family with sequence similarity 149 member A [Source:HGNC Symbol;Acc:HGNC:24527]
1461	ENSG00000228340	MIR646HG	-0.820515	-0.264334	-2.14456	0.0412926	0.908208	0.866784	10 x 8		20 q13	MIR646 host gene [Source:HGNC Symbol;Acc:HGNC:27659]
1462	ENSG00000128604	IRF5	0.549519	0.36781	2.1282	0.0412986	0.908208	0.86679	31 x 8		7 q32	interferon regulatory factor 5 [Source:HGNC Symbol;Acc:HGNC:6120]
1463	ENSG00000164659	KIAA1324L	-0.967047	-0.275632	-2.12585	0.0413442	0.908208	0.866834	1 x 1		7 q21	KIAA1324 like [Source:HGNC Symbol;Acc:HGNC:21945]
1464	ENSG00000179362		0.296329	0.17933	2.12399	0.0413518	0.908208	0.866841	15 x 36		15 q21	high mobility group nucleosomal binding domain 2 pseudogene 46 [Source:HGNC Symbol;Acc:HGNC:26817]
1465	ENSG00000272079	LOC107984895	0.972032	0.754682	2.13294	0.0413672	0.908208	0.866856	31 x 33		16 p13
1466	ENSG00000163125	RPRD2	-0.411796	-0.175313	-2.12619	0.0413834	0.908208	0.866871	5 x 12		1 q21	regulation of nuclear pre-mRNA domain containing 2 [Source:HGNC Symbol;Acc:HGNC:29039]
1467	ENSG00000069482	GAL	1.14255	0.936445	2.1451	0.0414029	0.908208	0.86689	40 x 21	C	11 q13	galanin and GMAP prepropeptide [Source:HGNC Symbol;Acc:HGNC:4114]
1468	ENSG00000254985		0.320705	0.196062	2.12501	0.0414557	0.908208	0.86694	14 x 15		11 q14	RSF1 intronic transcript 2 [Source:HGNC Symbol;Acc:HGNC:41438]
1469	ENSG00000148795	CYP17A1	-1.02291	-0.277074	-2.121	0.0415247	0.908208	0.867005	3 x 32		10 q24	cytochrome P450 family 17 subfamily A member 1 [Source:HGNC Symbol;Acc:HGNC:2593]
1470	ENSG00000236008	LINC01814	0.86533	0.648442	2.12094	0.0415528	0.908208	0.867032	9 x 35		2 p25	long intergenic non-protein coding RNA 1814 [Source:HGNC Symbol;Acc:HGNC:52618]
1471	ENSG00000175106	TVP23C	-0.289887	-0.132368	-2.12207	0.0415813	0.908208	0.867059	12 x 22		17 p12	trans-golgi network vesicle protein 23 homolog C [Source:HGNC Symbol;Acc:HGNC:30453]
1472	ENSG00000215482		0.256153	0.152408	2.1246	0.0415859	0.908208	0.867063	23 x 36		13 q14	calmodulin 2 pseudogene 3 [Source:HGNC Symbol;Acc:HGNC:1448]
1473	ENSG00000225523		-0.929298	-0.273762	-2.155	0.0416017	0.908208	0.867078	40 x 2	E	2 p11	immunoglobulin kappa variable 6D-21 (non-functional) [Source:HGNC Symbol;Acc:HGNC:5837]
1474	ENSG00000260948		-0.468641	-0.192763	-2.17518	0.0416114	0.908208	0.867087	3 x 28		1 p13
1475	ENSG00000167614	TTYH1	1.73943	1.68874	2.11973	0.0416442	0.908208	0.867118	30 x 25	B	19 q13	tweety family member 1 [Source:HGNC Symbol;Acc:HGNC:13476]
1476	ENSG00000128510	CPA4	-0.9167	-0.272977	-2.12103	0.0416854	0.908208	0.867157	40 x 16	C	7 q32	carboxypeptidase A4 [Source:HGNC Symbol;Acc:HGNC:15740]
1477	ENSG00000128408	RIBC2	0.531973	0.3537	2.11947	0.0417142	0.908208	0.867184	40 x 29	A	22 q13	RIB43A domain with coiled-coils 2 [Source:HGNC Symbol;Acc:HGNC:13241]
1478	ENSG00000250508	LOC105369364	-0.480081	-0.196077	-2.13571	0.0417292	0.908208	0.867198	24 x 31		11 q13
1479	ENSG00000246022	ALDH1L1-AS2	-0.45957	-0.190088	-2.16185	0.0417468	0.908208	0.867214	11 x 2		3 q21	ALDH1L1 antisense RNA 2 [Source:HGNC Symbol;Acc:HGNC:42446]
1480	ENSG00000219438	FAM19A5	-0.815871	-0.263798	-2.1211	0.0417799	0.908208	0.867246	21 x 5		22 q13	family with sequence similarity 19 member A5, C-C motif chemokine like [Source:HGNC Symbol;Acc:HGNC:21592]
1481	ENSG00000170265	ZNF282	0.489231	0.319983	2.11892	0.0418932	0.908208	0.867351	21 x 18		7 q36	zinc finger protein 282 [Source:HGNC Symbol;Acc:HGNC:13076]
1482	ENSG00000177469	CAVIN1	-0.679281	-0.243146	-2.11688	0.0418965	0.908208	0.867354	18 x 2	G	17 q21	caveolae associated protein 1 [Source:HGNC Symbol;Acc:HGNC:9688]
1483	ENSG00000185404	SP140L	-0.592262	-0.225058	-2.11998	0.0419055	0.908208	0.867363	34 x 10		2 q37	SP140 nuclear body protein like [Source:HGNC Symbol;Acc:HGNC:25105]
1484	ENSG00000137601	NEK1	-0.36227	-0.158775	-2.14066	0.0419182	0.908208	0.867375	2 x 14	I	4 q33	NIMA related kinase 1 [Source:HGNC Symbol;Acc:HGNC:7744]
1485	ENSG00000169302	STK32A	-0.782881	-0.259676	-2.13017	0.0419328	0.908208	0.867388	23 x 26		5 q32	serine/threonine kinase 32A [Source:HGNC Symbol;Acc:HGNC:28317]
1486	ENSG00000180385		0.531197	0.35308	2.11986	0.0419611	0.908208	0.867415	16 x 24		3 p25	EMC3 antisense RNA 1 [Source:HGNC Symbol;Acc:HGNC:49223]
1487	ENSG00000171943	SRGAP2C	-0.522591	-0.207809	-2.13314	0.0419859	0.908208	0.867437	14 x 13		1 p11	SLIT-ROBO Rho GTPase activating protein 2C [Source:HGNC Symbol;Acc:HGNC:30584]
1488	ENSG00000164362	TERT	0.887114	0.669663	2.11682	0.0419879	0.908208	0.867439	37 x 26	A	5 p15	telomerase reverse transcriptase [Source:HGNC Symbol;Acc:HGNC:11730]
1489	ENSG00000263513	FAM72C	0.558758	0.375302	2.13276	0.0419965	0.908208	0.867447	38 x 28	A	1 q21	family with sequence similarity 72 member C [Source:HGNC Symbol;Acc:HGNC:30602]
1490	ENSG00000272070		-0.8549	-0.267962	-2.15456	0.0419974	0.908208	0.867448	28 x 23		5 q31
1491	ENSG00000186940		0.538643	0.359045	2.11543	0.0420311	0.908208	0.867479	38 x 37		9 q21	coiled-coil-helix-coiled-coil-helix domain containing 2 pseudogene 9 [Source:HGNC Symbol;Acc:HGNC:23676]
1492	ENSG00000240024	LINC00888	0.557478	0.374261	2.13071	0.0420321	0.908208	0.86748	32 x 26	B	3 q27	long intergenic non-protein coding RNA 888 [Source:HGNC Symbol;Acc:HGNC:48575]
1493	ENSG00000178187	ZNF454	-0.547107	-0.214159	-2.11532	0.0420836	0.908208	0.867528	30 x 23	B	5 q35	zinc finger protein 454 [Source:HGNC Symbol;Acc:HGNC:21200]
1494	ENSG00000166192	SENP8	0.356843	0.221423	2.11688	0.0420935	0.908208	0.867537	19 x 37		15 q23	SUMO/sentrin peptidase family member, NEDD8 specific [Source:HGNC Symbol;Acc:HGNC:22992]
1495	ENSG00000167011	NAT16	0.341714	0.210725	2.12656	0.0421073	0.908208	0.86755	31 x 30		7 q22	N-acetyltransferase 16 (putative) [Source:HGNC Symbol;Acc:HGNC:22030]
1496	ENSG00000109670	FBXW7	-0.335388	-0.149278	-2.11467	0.0421911	0.908208	0.867627	14 x 11		4 q31	F-box and WD repeat domain containing 7 [Source:HGNC Symbol;Acc:HGNC:16712]
1497	ENSG00000101945	SUV39H1	0.329836	0.202408	2.11406	0.042194	0.908208	0.86763	39 x 30	A	X p11	suppressor of variegation 3-9 homolog 1 [Source:HGNC Symbol;Acc:HGNC:11479]
1498	ENSG00000213221	DNLZ	0.42602	0.271815	2.11393	0.0422269	0.908208	0.86766	18 x 20		9 q34	DNL-type zinc finger [Source:HGNC Symbol;Acc:HGNC:33879]
1499	ENSG00000230615		-0.597907	-0.226347	-2.14036	0.0422278	0.908208	0.867661	33 x 34		1 p34
1500	ENSG00000161513	FDXR	0.53401	0.35533	2.12047	0.0422549	0.908208	0.867685	18 x 40		17 q25	ferredoxin reductase [Source:HGNC Symbol;Acc:HGNC:3642]
1501	ENSG00000274026	FAM27E3	0.500937	0.329125	2.1121	0.0423663	0.908208	0.867787	31 x 31		9 q21	family with sequence similarity 27 member E3 [Source:HGNC Symbol;Acc:HGNC:28655]
1502	ENSG00000233108		-0.244437	-0.11443	-2.11168	0.0423724	0.908208	0.867793	13 x 13		7 p21
1503	ENSG00000100023	PPIL2	0.411302	0.260891	2.11406	0.0423776	0.908208	0.867798	23 x 13		22 q11	peptidylprolyl isomerase like 2 [Source:HGNC Symbol;Acc:HGNC:9261]
1504	ENSG00000149927	DOC2A	1.14611	0.940388	2.11141	0.0424024	0.908208	0.86782	1 x 39		16 p11	double C2 domain alpha [Source:HGNC Symbol;Acc:HGNC:2985]
1505	ENSG00000224051	CPTP	0.506753	0.333693	2.11379	0.0424333	0.908208	0.867848	40 x 36		1 p36	ceramide-1-phosphate transfer protein [Source:HGNC Symbol;Acc:HGNC:28116]
1506	ENSG00000199036	MIR219A1	0.290764	0.175551	2.11122	0.0424379	0.908208	0.867852	19 x 31		6 p21	microRNA 219a-1 [Source:HGNC Symbol;Acc:HGNC:31597]
1507	ENSG00000260249	LOC101927272	0.352985	0.218684	2.11451	0.0425517	0.908208	0.867956	17 x 24		16 q12
1508	ENSG00000111254	AKAP3	0.908916	0.691142	2.1193	0.042601	0.908208	0.868	22 x 25		12 p13	A-kinase anchoring protein 3 [Source:HGNC Symbol;Acc:HGNC:373]
1509	ENSG00000231074		-0.324021	-0.145152	-2.11764	0.0426491	0.908208	0.868043	28 x 21		6 p22	HLA complex group 18 (non-protein coding) [Source:HGNC Symbol;Acc:HGNC:31337]
1510	ENSG00000185924	RTN4RL1	1.12019	0.911764	2.11256	0.042652	0.908208	0.868046	9 x 40	K	17 p13	reticulon 4 receptor like 1 [Source:HGNC Symbol;Acc:HGNC:21329]
1511	ENSG00000100722	ZC3H14	0.337993	0.208112	2.12509	0.0426607	0.908208	0.868054	5 x 14		14 q31	zinc finger CCCH-type containing 14 [Source:HGNC Symbol;Acc:HGNC:20509]
1512	ENSG00000135821	GLUL	-0.357326	-0.157056	-2.12931	0.0426672	0.908208	0.86806	12 x 37		1 q25	glutamate-ammonia ligase [Source:HGNC Symbol;Acc:HGNC:4341]
1513	ENSG00000011590	ZBTB32	0.424817	0.270918	2.11672	0.0427288	0.908208	0.868115	34 x 7		19 q13	zinc finger and BTB domain containing 32 [Source:HGNC Symbol;Acc:HGNC:16763]
1514	ENSG00000271969		0.339876	0.209433	2.10904	0.0427535	0.908208	0.868137	10 x 29		12 p13
1515	ENSG00000100632	ERH	0.398427	0.251424	2.10702	0.0428188	0.908208	0.868196	36 x 35		14 q24	ERH, mRNA splicing and mitosis factor [Source:HGNC Symbol;Acc:HGNC:3447]
1516	ENSG00000151718	WWC2	-0.507562	-0.203766	-2.1222	0.0428317	0.908208	0.868207	5 x 5	H	4 q35	WW and C2 domain containing 2 [Source:HGNC Symbol;Acc:HGNC:24148]
1517	ENSG00000112118	MCM3	0.452794	0.29197	2.11076	0.0428664	0.908208	0.868238	37 x 27	A	6 p12	minichromosome maintenance complex component 3 [Source:HGNC Symbol;Acc:HGNC:6945]
1518	ENSG00000175305	CCNE2	0.602599	0.411443	2.13054	0.0428936	0.908208	0.868262	40 x 26	A	8 q22	cyclin E2 [Source:HGNC Symbol;Acc:HGNC:1590]
1519	ENSG00000262810		-0.266362	-0.123214	-2.10944	0.0429048	0.908208	0.868272	12 x 19		17 p13
1520	ENSG00000250966		0.399135	0.251942	2.1071	0.042909	0.908208	0.868276	23 x 38		4 q25
1521	ENSG00000245067	IGFBP7-AS1	-0.382357	-0.165632	-2.10656	0.0431071	0.908208	0.868452	17 x 8		4 q12	IGFBP7 antisense RNA 1 [Source:HGNC Symbol;Acc:HGNC:40296]
1522	ENSG00000198315	ZKSCAN8	-0.419719	-0.177843	-2.10376	0.0431137	0.908208	0.868457	3 x 19		6 p22	zinc finger with KRAB and SCAN domains 8 [Source:HGNC Symbol;Acc:HGNC:12983]
1523	ENSG00000225096		-0.698108	-0.246554	-2.13444	0.0431396	0.908208	0.86848	25 x 26		6 p11
1524	ENSG00000128254		0.367729	0.229192	2.11578	0.0431488	0.908208	0.868488	16 x 14		22 q12	chromosome 22 open reading frame 24 [Source:HGNC Symbol;Acc:HGNC:23051]
1525	ENSG00000215533	LINC00189	-0.290349	-0.132545	-2.1066	0.0431741	0.908208	0.86851	31 x 8		21 q21	long intergenic non-protein coding RNA 189 [Source:HGNC Symbol;Acc:HGNC:18461]
1526	ENSG00000036448	MYOM2	0.706003	0.500544	2.10306	0.0432306	0.908208	0.86856	9 x 2		8 p23	myomesin 2 [Source:HGNC Symbol;Acc:HGNC:7614]
1527	ENSG00000274253	LOC283683	0.534376	0.355623	2.11128	0.0432747	0.908208	0.868599	16 x 13		15 q11
1528	ENSG00000237190	CDKN2AIPNL	-0.407378	-0.173888	-2.10507	0.0432754	0.908208	0.868599	21 x 40		5 q31	CDKN2A interacting protein N-terminal like [Source:HGNC Symbol;Acc:HGNC:30545]
1529	ENSG00000213279		-0.29464	-0.134184	-2.10345	0.0432795	0.908208	0.868603	14 x 11		22 q13
1530	ENSG00000110274	CEP164	-0.304578	-0.137943	-2.10446	0.0432972	0.908208	0.868618	18 x 20		11 q23	centrosomal protein 164 [Source:HGNC Symbol;Acc:HGNC:29182]
1531	ENSG00000063046	EIF4B	-0.394533	-0.169689	-2.12115	0.0433072	0.908208	0.868627	1 x 19		12 q13	eukaryotic translation initiation factor 4B [Source:HGNC Symbol;Acc:HGNC:3285]
1532	ENSG00000198874	TYW1	-0.246711	-0.115352	-2.131	0.0433297	0.908208	0.868647	6 x 13		7 q11	tRNA-yW synthesizing protein 1 homolog [Source:HGNC Symbol;Acc:HGNC:25598]
1533	ENSG00000175606	TMEM70	0.407424	0.25803	2.10392	0.0433363	0.908208	0.868653	39 x 33	A	8 q21	transmembrane protein 70 [Source:HGNC Symbol;Acc:HGNC:26050]
1534	ENSG00000132600	PRMT7	0.260879	0.155533	2.10126	0.0433409	0.908208	0.868657	20 x 20		16 q22	protein arginine methyltransferase 7 [Source:HGNC Symbol;Acc:HGNC:25557]
1535	ENSG00000130147	SH3BP4	-0.600811	-0.227005	-2.10633	0.0434057	0.908208	0.868713	5 x 3		2 q37	SH3 domain binding protein 4 [Source:HGNC Symbol;Acc:HGNC:10826]
1536	ENSG00000269608		0.199307	0.115715	2.13389	0.0434394	0.908208	0.868742	22 x 36		19 q13
1537	ENSG00000262814	MRPL12	0.655411	0.456273	2.10524	0.0434636	0.908208	0.868763	39 x 40		17 q25	mitochondrial ribosomal protein L12 [Source:HGNC Symbol;Acc:HGNC:10378]
1538	ENSG00000223564		0.283317	0.170521	2.10936	0.0434873	0.908208	0.868784	16 x 14		2 q11	cytochrome P450 family 4 subfamily F member 32, pseudogene [Source:HGNC Symbol;Acc:HGNC:39951]
1539	ENSG00000226427		0.25695	0.152934	2.11615	0.0435281	0.908208	0.868819	24 x 36		3 p25	high mobility group nucleosomal binding domain 2 pseudogene 7 [Source:HGNC Symbol;Acc:HGNC:33575]
1540	ENSG00000199349		-0.309164	-0.13966	-2.10633	0.0435457	0.908208	0.868835	15 x 16		1 q32	Y RNA [Source:RFAM;Acc:RF00019]
1541	ENSG00000125945	ZNF436	0.364089	0.226587	2.10353	0.0435477	0.908208	0.868836	6 x 10		1 p36	zinc finger protein 436 [Source:HGNC Symbol;Acc:HGNC:20814]
1542	ENSG00000100796	PPP4R3A	0.390908	0.245934	2.1161	0.043559	0.908208	0.868846	6 x 14		14 q32	protein phosphatase 4 regulatory subunit 3A [Source:HGNC Symbol;Acc:HGNC:20219]
1543	ENSG00000277200		0.823514	0.608381	2.10512	0.04356	0.908208	0.868847	31 x 30		17 p13
1544	ENSG00000199476		-0.270028	-0.124659	-2.10085	0.0435611	0.908208	0.868848	11 x 14		3 p21	Y RNA [Source:RFAM;Acc:RF00019]
1545	ENSG00000184702	2020-09-05	0.801578	0.587719	2.09992	0.0435723	0.908208	0.868858	30 x 28		22 q11	septin 5 [Source:HGNC Symbol;Acc:HGNC:9164]
1546	ENSG00000148362	PAXX	0.50577	0.33292	2.09874	0.0435739	0.908208	0.868859	40 x 40		9 q34	PAXX, non-homologous end joining factor [Source:HGNC Symbol;Acc:HGNC:27849]
1547	ENSG00000103740	ACSBG1	0.345315	0.213261	2.09894	0.0436199	0.908208	0.868899	15 x 23		15 q25	acyl-CoA synthetase bubblegum family member 1 [Source:HGNC Symbol;Acc:HGNC:29567]
1548	ENSG00000249249		-0.406723	-0.173676	-2.09988	0.0436226	0.908208	0.868901	15 x 34		5 q22
1549	ENSG00000237233		-0.313762	-0.141372	-2.10998	0.0436265	0.908208	0.868904	17 x 35		10 q21	TMEM26 antisense RNA 1 [Source:HGNC Symbol;Acc:HGNC:51209]
1550	ENSG00000130449	ZSWIM6	-0.346232	-0.153153	-2.09825	0.0436456	0.908208	0.868921	6 x 13		5 q12	zinc finger SWIM-type containing 6 [Source:HGNC Symbol;Acc:HGNC:29316]
1551	ENSG00000270332	SMC2-AS1	0.354701	0.219901	2.10802	0.0437189	0.908208	0.868984	18 x 26		9 q31	SMC2 antisense RNA 1 (head to head) [Source:HGNC Symbol;Acc:HGNC:50827]
1552	ENSG00000267858	MZF1-AS1	0.517127	0.341883	2.11968	0.0437432	0.908208	0.869005	6 x 28		19 q13	MZF1 antisense RNA 1 [Source:HGNC Symbol;Acc:HGNC:51271]
1553	ENSG00000254536		-0.320757	-0.143955	-2.10742	0.0437561	0.908208	0.869016	16 x 16		10 q26
1554	ENSG00000163848	ZNF148	-0.310582	-0.140189	-2.10226	0.0437891	0.908208	0.869044	3 x 13	I	3 q21	zinc finger protein 148 [Source:HGNC Symbol;Acc:HGNC:12933]
1555	ENSG00000132031	MATN3	-0.679186	-0.243128	-2.09758	0.0437901	0.908208	0.869045	21 x 1	G	2 p24	matrilin 3 [Source:HGNC Symbol;Acc:HGNC:6909]
1556	ENSG00000184436	THAP7	0.361049	0.224417	2.09607	0.0438275	0.908208	0.869077	40 x 39		22 q11	THAP domain containing 7 [Source:HGNC Symbol;Acc:HGNC:23190]
1557	ENSG00000129757	CDKN1C	-0.824996	-0.264841	-2.10862	0.0438333	0.908208	0.869082	25 x 26		11 p15	cyclin dependent kinase inhibitor 1C [Source:HGNC Symbol;Acc:HGNC:1786]
1558	ENSG00000177614	PGBD5	1.00406	0.787699	2.09935	0.0438346	0.908208	0.869083	40 x 20	C	1 q42	piggyBac transposable element derived 5 [Source:HGNC Symbol;Acc:HGNC:19405]
1559	ENSG00000273139		0.382555	0.23987	2.11462	0.0438553	0.908208	0.869101	31 x 33		22 q11
1560	ENSG00000183145	RIPPLY3	0.815745	0.601035	2.09878	0.0439573	0.908208	0.869187	40 x 28	A	21 q22	ripply transcriptional repressor 3 [Source:HGNC Symbol;Acc:HGNC:3047]
1561	ENSG00000226969		0.389695	0.245052	2.09587	0.0440326	0.908208	0.869251	30 x 34		1 p36
1562	ENSG00000253986		-0.244776	-0.114568	-2.09562	0.0440499	0.908208	0.869266	20 x 31		8 p21
1563	ENSG00000137177	KIF13A	-0.374268	-0.162895	-2.09376	0.0440611	0.908208	0.869275	4 x 7	H	6 p22	kinesin family member 13A [Source:HGNC Symbol;Acc:HGNC:14566]
1564	ENSG00000267871	LOC105372476	0.362487	0.225443	2.09422	0.0440747	0.908208	0.869287	9 x 29		19 q13
1565	ENSG00000029639	TFB1M	0.356924	0.22148	2.09424	0.0440818	0.908208	0.869293	21 x 38		6 q25	transcription factor B1, mitochondrial [Source:HGNC Symbol;Acc:HGNC:17037]
1566	ENSG00000267734		-0.363592	-0.159233	-2.09846	0.0441426	0.908208	0.869344	15 x 28		1 p22
1567	ENSG00000170464	DNAJC18	-0.412405	-0.175509	-2.10286	0.0441613	0.908208	0.86936	6 x 2		5 q31	DnaJ heat shock protein family (Hsp40) member C18 [Source:HGNC Symbol;Acc:HGNC:28429]
1568	ENSG00000248587		-0.854678	-0.267941	-2.14218	0.0441664	0.908208	0.869364	22 x 30		5 p13	GDNF antisense RNA 1 (head to head) [Source:HGNC Symbol;Acc:HGNC:43592]
1569	ENSG00000145431	PDGFC	-0.549936	-0.214872	-2.11042	0.0442626	0.908208	0.869445	22 x 6		4 q32	platelet derived growth factor C [Source:HGNC Symbol;Acc:HGNC:8801]
1570	ENSG00000224905		-0.506687	-0.203527	-2.11108	0.0442872	0.908208	0.869466	21 x 28		21 q11
1571	ENSG00000099622	CIRBP	-0.358481	-0.157458	-2.09139	0.0442881	0.908208	0.869466	7 x 32		19 p13	cold inducible RNA binding protein [Source:HGNC Symbol;Acc:HGNC:1982]
1572	ENSG00000107147	KCNT1	1.3115	1.13107	2.09522	0.0443036	0.908208	0.869479	18 x 21		9 q34	potassium sodium-activated channel subfamily T member 1 [Source:HGNC Symbol;Acc:HGNC:18865]
1573	ENSG00000157954	WIPI2	-0.384879	-0.166479	-2.09544	0.0443177	0.908208	0.869491	22 x 21		7 p22	WD repeat domain, phosphoinositide interacting 2 [Source:HGNC Symbol;Acc:HGNC:32225]
1574	ENSG00000228285		0.396581	0.250074	2.09188	0.0443365	0.908208	0.869507	24 x 37		6 p21	lysophospholipase II pseudogene 1 [Source:HGNC Symbol;Acc:HGNC:21069]
1575	ENSG00000174796	THAP6	0.358952	0.222923	2.10937	0.0443638	0.908208	0.86953	1 x 14	I	4 q21	THAP domain containing 6 [Source:HGNC Symbol;Acc:HGNC:23189]
1576	ENSG00000262075	DKFZP434A062	0.369355	0.230357	2.10555	0.0444349	0.908208	0.869589	17 x 13		9 q34	uncharacterized LOC26102 [Source:NCBI gene;Acc:26102]
1577	ENSG00000124508	BTN2A2	-0.371428	-0.161927	-2.09452	0.0444942	0.908208	0.869638	33 x 8		6 p22	butyrophilin subfamily 2 member A2 [Source:HGNC Symbol;Acc:HGNC:1137]
1578	ENSG00000270490		0.233579	0.137641	2.08897	0.0445055	0.908208	0.869648	12 x 12		15 q22
1579	ENSG00000149925	ALDOA	0.4577	0.295702	2.13179	0.0445173	0.908208	0.869657	40 x 36		16 p11	aldolase, fructose-bisphosphate A [Source:HGNC Symbol;Acc:HGNC:414]
1580	ENSG00000128739	SNRPN	-0.78559	-0.260035	-2.11921	0.0445251	0.908208	0.869664	18 x 40		15 q11	small nuclear ribonucleoprotein polypeptide N [Source:HGNC Symbol;Acc:HGNC:11164]
1581	ENSG00000198825	INPP5F	-0.469036	-0.192878	-2.11317	0.0445367	0.908208	0.869674	23 x 8		10 q26	inositol polyphosphate-5-phosphatase F [Source:HGNC Symbol;Acc:HGNC:17054]
1582	ENSG00000138376	BARD1	0.414788	0.263469	2.08846	0.0445504	0.908208	0.869685	38 x 27	A	2 q35	BRCA1 associated RING domain 1 [Source:HGNC Symbol;Acc:HGNC:952]
1583	ENSG00000100979	PLTP	-0.651941	-0.237876	-2.08851	0.0445717	0.908208	0.869702	17 x 9		20 q13	phospholipid transfer protein [Source:HGNC Symbol;Acc:HGNC:9093]
1584	ENSG00000236671		0.334458	0.205635	2.08826	0.0446211	0.908208	0.869743	36 x 17		10 q21	PRKG1 antisense RNA 1 [Source:HGNC Symbol;Acc:HGNC:45029]
1585	ENSG00000225489		0.888572	0.671092	2.10966	0.0446457	0.908208	0.869764	30 x 32		9 p24
1586	ENSG00000234003		-0.488107	-0.198362	-2.10062	0.0446486	0.908208	0.869766	13 x 21		19 p13	mitochondrially encoded ATP synthase 6 pseudogene 27 [Source:HGNC Symbol;Acc:HGNC:52183]
1587	ENSG00000115252	PDE1A	-1.06967	-0.277065	-2.10216	0.0446773	0.908208	0.86979	29 x 1		2 q32	phosphodiesterase 1A [Source:HGNC Symbol;Acc:HGNC:8774]
1588	ENSG00000152475	ZNF837	0.468901	0.30427	2.08795	0.0446843	0.908208	0.869795	20 x 17		19 q13	zinc finger protein 837 [Source:HGNC Symbol;Acc:HGNC:25164]
1589	ENSG00000138162	TACC2	-0.554267	-0.215956	-2.08677	0.0447138	0.908208	0.86982	23 x 20		10 q26	transforming acidic coiled-coil containing protein 2 [Source:HGNC Symbol;Acc:HGNC:11523]
1590	ENSG00000136535	TBR1	0.344174	0.212456	2.10457	0.0447328	0.908208	0.869835	32 x 21		2 q24	T-box, brain 1 [Source:HGNC Symbol;Acc:HGNC:11590]
1591	ENSG00000186185	KIF18B	0.548897	0.367306	2.08766	0.0447401	0.908208	0.869841	40 x 26	A	17 q21	kinesin family member 18B [Source:HGNC Symbol;Acc:HGNC:27102]
1592	ENSG00000230561	CCDC192	-0.485974	-0.197758	-2.10868	0.0448861	0.908208	0.869961	24 x 30		5 q23	coiled-coil domain containing 192 [Source:HGNC Symbol;Acc:HGNC:49566]
1593	ENSG00000160404	TOR2A	0.577097	0.390301	2.086	0.0448945	0.908208	0.869968	17 x 40		9 q34	torsin family 2 member A [Source:HGNC Symbol;Acc:HGNC:11996]
1594	ENSG00000168936	TMEM129	0.466396	0.302348	2.089	0.0449337	0.908208	0.87	16 x 40		4 p16	transmembrane protein 129 [Source:HGNC Symbol;Acc:HGNC:25137]
1595	ENSG00000164535	DAGLB	-0.403065	-0.172488	-2.10779	0.0449455	0.908208	0.870009	19 x 15		7 p22	diacylglycerol lipase beta [Source:HGNC Symbol;Acc:HGNC:28923]
1596	ENSG00000164619	BMPER	-0.541439	-0.212718	-2.08821	0.0449523	0.908208	0.870015	14 x 1		7 p14	BMP binding endothelial regulator [Source:HGNC Symbol;Acc:HGNC:24154]
1597	ENSG00000269226	TMSB15B	0.386413	0.242666	2.08868	0.0449526	0.908208	0.870015	30 x 23	B	X q22	thymosin beta 15B [Source:NCBI gene;Acc:286527]
1598	ENSG00000179364	PACS2	0.362639	0.225552	2.08432	0.0449632	0.908208	0.870024	20 x 18		14 q32	phosphofurin acidic cluster sorting protein 2 [Source:HGNC Symbol;Acc:HGNC:23794]
1599	ENSG00000146676	PURB	-0.33128	-0.147794	-2.08402	0.0449878	0.908208	0.870044	5 x 14		7 p13	purine rich element binding protein B [Source:HGNC Symbol;Acc:HGNC:9702]
1600	ENSG00000105849	TWISTNB	-0.435417	-0.182763	-2.08344	0.0450388	0.908208	0.870085	31 x 17		7 p21	TWIST neighbor [Source:HGNC Symbol;Acc:HGNC:18027]
1601	ENSG00000252690		0.432502	0.276661	2.08329	0.0450499	0.908208	0.870094	7 x 23		15 q25	small Cajal body-specific RNA 15 [Source:HGNC Symbol;Acc:HGNC:32572]
1602	ENSG00000247317		0.888796	0.671311	2.08575	0.0451219	0.908208	0.870152	37 x 12		8 q24
1603	ENSG00000063978	RNF4	0.314485	0.191764	2.08471	0.0451372	0.908208	0.870165	26 x 14		4 p16	ring finger protein 4 [Source:HGNC Symbol;Acc:HGNC:10067]
1604	ENSG00000230524	COL6A4P1	-0.575328	-0.221091	-2.08405	0.0451478	0.908208	0.870173	26 x 31		3 p25	collagen type VI alpha 4 pseudogene 1 [Source:HGNC Symbol;Acc:HGNC:33484]
1605	ENSG00000173376	NDNF	-0.769289	-0.257817	-2.08879	0.045185	0.908208	0.870203	5 x 1		4 q27	neuron derived neurotrophic factor [Source:HGNC Symbol;Acc:HGNC:26256]
1606	ENSG00000182185	RAD51B	0.400589	0.253008	2.08257	0.045229	0.908208	0.870239	21 x 28		14 q24	RAD51 paralog B [Source:HGNC Symbol;Acc:HGNC:9822]
1607	ENSG00000077616	NAALAD2	-0.597406	-0.226233	-2.10293	0.045238	0.908208	0.870246	12 x 3		11 q14	N-acetylated alpha-linked acidic dipeptidase 2 [Source:HGNC Symbol;Acc:HGNC:14526]
1608	ENSG00000168476	REEP4	0.365973	0.227934	2.08529	0.0452599	0.908208	0.870264	40 x 31	A	8 p21	receptor accessory protein 4 [Source:HGNC Symbol;Acc:HGNC:26176]
1609	ENSG00000213440		0.23932	0.141372	2.08339	0.0452704	0.908208	0.870272	14 x 17		21 q22	H2A histone family member Z pseudogene 1 [Source:HGNC Symbol;Acc:HGNC:4742]
1610	ENSG00000274515		0.241588	0.14285	2.09979	0.0452983	0.908208	0.870294	11 x 32		15 q24
1611	ENSG00000228039		0.382142	0.239571	2.07963	0.0454117	0.908208	0.870385	17 x 36		22 q11
1612	ENSG00000230453	ANKRD18B	0.805627	0.591514	2.11837	0.0454498	0.908208	0.870415	28 x 15		9 p13	ankyrin repeat domain 18B [Source:HGNC Symbol;Acc:HGNC:23644]
1613	ENSG00000175756	AURKAIP1	0.527936	0.350476	2.07995	0.0454531	0.908208	0.870418	39 x 38		1 p36	aurora kinase A interacting protein 1 [Source:HGNC Symbol;Acc:HGNC:24114]
1614	ENSG00000233040		-0.216562	-0.10291	-2.08148	0.0454581	0.908208	0.870422	21 x 35		1 q31	family with sequence similarity 204 member B, pseudogene [Source:HGNC Symbol;Acc:HGNC:42011]
1615	ENSG00000021852	C8B	-0.195293	-0.0938559	-2.09562	0.0454637	0.908208	0.870427	19 x 33		1 p32	complement C8 beta chain [Source:HGNC Symbol;Acc:HGNC:1353]
1616	ENSG00000131400	NAPSA	0.474706	0.308736	2.08988	0.0454652	0.908208	0.870428	7 x 25	J	19 q13	napsin A aspartic peptidase [Source:HGNC Symbol;Acc:HGNC:13395]
1617	ENSG00000169679	BUB1	0.539174	0.359472	2.08345	0.0454894	0.908208	0.870447	40 x 26	A	2 q13	BUB1 mitotic checkpoint serine/threonine kinase [Source:HGNC Symbol;Acc:HGNC:1148]
1618	ENSG00000203321		0.282286	0.169826	2.07915	0.045507	0.908208	0.870461	12 x 17		9 q21	C9orf41 antisense RNA 1 [Source:HGNC Symbol;Acc:HGNC:51188]
1619	ENSG00000172137	CALB2	-1.32817	-0.257019	-2.07854	0.0455116	0.908208	0.870465	28 x 1		16 q22	calbindin 2 [Source:HGNC Symbol;Acc:HGNC:1435]
1620	ENSG00000169692	AGPAT2	0.572416	0.386456	2.08373	0.0456035	0.908208	0.870538	40 x 37		9 q34	1-acylglycerol-3-phosphate O-acyltransferase 2 [Source:HGNC Symbol;Acc:HGNC:325]
1621	ENSG00000172971		0.29755	0.18016	2.09568	0.0456304	0.908208	0.870559	32 x 12		3 p12	unc-93 homolog B3 pseudogene (C. elegans) [Source:HGNC Symbol;Acc:HGNC:13483]
1622	ENSG00000122140	MRPS2	0.476311	0.309973	2.07876	0.0456512	0.908208	0.870575	39 x 35		9 q34	mitochondrial ribosomal protein S2 [Source:HGNC Symbol;Acc:HGNC:14495]
1623	ENSG00000184599	FAM19A3	0.593951	0.404236	2.08008	0.04567	0.908208	0.87059	38 x 20	C	1 p13	family with sequence similarity 19 member A3, C-C motif chemokine like [Source:HGNC Symbol;Acc:HGNC:21590]
1624	ENSG00000103549	RNF40	0.374329	0.233932	2.10957	0.0456792	0.908208	0.870597	23 x 16		16 p11	ring finger protein 40 [Source:HGNC Symbol;Acc:HGNC:16867]
1625	ENSG00000227060		0.576274	0.389624	2.07913	0.0457046	0.908208	0.870617	22 x 30		X q26	long intergenic non-protein coding RNA 629 [Source:HGNC Symbol;Acc:HGNC:44262]
1626	ENSG00000196154	S100A4	-1.03009	-0.277145	-2.09407	0.0457534	0.908208	0.870656	38 x 13		1 q21	S100 calcium binding protein A4 [Source:HGNC Symbol;Acc:HGNC:10494]
1627	ENSG00000162542	TMCO4	0.488309	0.319265	2.07808	0.0457706	0.908208	0.870669	20 x 16		1 p36	transmembrane and coiled-coil domains 4 [Source:HGNC Symbol;Acc:HGNC:27393]
1628	ENSG00000126010	GRPR	0.358768	0.222792	2.07957	0.0457946	0.908208	0.870688	1 x 18		X p22	gastrin releasing peptide receptor [Source:HGNC Symbol;Acc:HGNC:4609]
1629	ENSG00000166225	FRS2	-0.246833	-0.115402	-2.0775	0.0457965	0.908208	0.87069	1 x 17		12 q15	fibroblast growth factor receptor substrate 2 [Source:HGNC Symbol;Acc:HGNC:16971]
1630	ENSG00000253953	PCDHGB4	-1.12351	-0.275682	-2.08746	0.0458179	0.908208	0.870707	7 x 5		5 q31	protocadherin gamma subfamily B, 4 [Source:HGNC Symbol;Acc:HGNC:8711]
1631	ENSG00000149212	SESN3	-0.514408	-0.205622	-2.08416	0.0458182	0.908208	0.870707	8 x 3		11 q21	sestrin 3 [Source:HGNC Symbol;Acc:HGNC:23060]
1632	ENSG00000237276		0.523877	0.347243	2.08635	0.0458449	0.908208	0.870728	32 x 33		1 p36	anoctamin 7 like 1 [Source:HGNC Symbol;Acc:HGNC:32248]
1633	ENSG00000119414	PPP6C	0.314907	0.192055	2.09076	0.0458632	0.908208	0.870742	18 x 38		9 q33	protein phosphatase 6 catalytic subunit [Source:HGNC Symbol;Acc:HGNC:9323]
1634	ENSG00000188242	PP7080	0.3907	0.245783	2.0777	0.0458858	0.908208	0.87076	31 x 33		5 p15	uncharacterized LOC25845 [Source:NCBI gene;Acc:25845]
1635	ENSG00000237126		-0.28158	-0.129168	-2.07487	0.0458898	0.908208	0.870763	6 x 13		2 q37
1636	ENSG00000261537		-0.266633	-0.123321	-2.07712	0.0459084	0.908208	0.870777	15 x 16		16 q23
1637	ENSG00000236972		0.257705	0.153433	2.0836	0.0459325	0.908208	0.870796	26 x 36		13 q22	fatty acid binding protein 5 pseudogene 1 [Source:HGNC Symbol;Acc:HGNC:31059]
1638	ENSG00000205955		0.485986	0.317461	2.08837	0.0459517	0.908208	0.870811	19 x 28		3 q27	heat shock protein 90 alpha family class A member 5, pseudogene [Source:HGNC Symbol;Acc:HGNC:32535]
1639	ENSG00000112695	COX7A2	0.505532	0.332733	2.07455	0.0459521	0.908208	0.870812	37 x 36		6 q14	cytochrome c oxidase subunit 7A2 [Source:HGNC Symbol;Acc:HGNC:2288]
1640	ENSG00000259113		0.245269	0.145256	2.08096	0.0459541	0.908208	0.870813	12 x 12		14 q22
1641	ENSG00000248174	LINC02268	-0.775046	-0.258616	-2.11701	0.0459714	0.908208	0.870827	21 x 29		4 q34	long intergenic non-protein coding RNA 2268 [Source:HGNC Symbol;Acc:HGNC:53183]
1642	ENSG00000248222		-0.496715	-0.200776	-2.07752	0.045994	0.908208	0.870844	12 x 20		5 q35
1643	ENSG00000135248	FAM71F1	-0.514518	-0.205652	-2.09293	0.0459952	0.908208	0.870845	14 x 19		7 q32	family with sequence similarity 71 member F1 [Source:HGNC Symbol;Acc:HGNC:30704]
1644	ENSG00000249020		-0.24414	-0.114309	-2.07435	0.0460408	0.908208	0.870881	12 x 17		3 q22	small nucleolar RNA, H/ACA box 58 [Source:HGNC Symbol;Acc:HGNC:32652]
1645	ENSG00000119965	C10orf88	-0.246592	-0.115304	-2.07285	0.0460734	0.908208	0.870906	29 x 16		10 q26	chromosome 10 open reading frame 88 [Source:HGNC Symbol;Acc:HGNC:25822]
1646	ENSG00000278456		0.399899	0.252502	2.07535	0.0461599	0.908208	0.870973	19 x 24		15 q26
1647	ENSG00000167633	KIR3DL1	-0.380867	-0.165131	-2.08031	0.0461636	0.908208	0.870976	35 x 9		19 q13	killer cell immunoglobulin like receptor, three Ig domains and long cytoplasmic tail 1 [Source:HGNC Symbol;Acc:HGNC:6338]
1648	ENSG00000177034	MTX3	-0.338834	-0.150516	-2.07289	0.0462168	0.908208	0.871017	2 x 20		5 q14	metaxin 3 [Source:HGNC Symbol;Acc:HGNC:24812]
1649	ENSG00000111339	ART4	-0.506539	-0.203487	-2.09292	0.046261	0.908208	0.871051	14 x 6		12 p12	ADP-ribosyltransferase 4 (Dombrock blood group) [Source:HGNC Symbol;Acc:HGNC:726]
1650	ENSG00000196504	PRPF40A	0.272662	0.163372	2.07084	0.0462858	0.908208	0.87107	29 x 18		2 q23	pre-mRNA processing factor 40 homolog A [Source:HGNC Symbol;Acc:HGNC:16463]
1651	ENSG00000261804	LOC102723373	0.536486	0.357314	2.07064	0.0462911	0.908208	0.871074	9 x 37		16 q12
1652	ENSG00000140691	ARMC5	0.331877	0.203832	2.08238	0.0462965	0.908208	0.871078	20 x 17		16 p11	armadillo repeat containing 5 [Source:HGNC Symbol;Acc:HGNC:25781]
1653	ENSG00000155393	HEATR3	0.379452	0.237626	2.07835	0.0463381	0.908208	0.87111	30 x 14		16 q12	HEAT repeat containing 3 [Source:HGNC Symbol;Acc:HGNC:26087]
1654	ENSG00000269615		-0.443414	-0.185221	-2.08754	0.0463621	0.908208	0.871129	21 x 30		19 p12	metadherin pseudogene 2 [Source:HGNC Symbol;Acc:HGNC:52358]
1655	ENSG00000120322	PCDHB8	-1.3901	-0.247189	-2.07627	0.0464072	0.908208	0.871163	7 x 4		5 q31	protocadherin beta 8 [Source:HGNC Symbol;Acc:HGNC:8693]
1656	ENSG00000146197	SCUBE3	-1.22854	-0.268756	-2.07944	0.0464732	0.908208	0.871214	30 x 24	B	6 p21	signal peptide, CUB domain and EGF like domain containing 3 [Source:HGNC Symbol;Acc:HGNC:13655]
1657	ENSG00000081818	PCDHB4	-0.574916	-0.220993	-2.07192	0.0464792	0.908208	0.871218	7 x 2		5 q31	protocadherin beta 4 [Source:HGNC Symbol;Acc:HGNC:8689]
1658	ENSG00000183742	MACC1	-1.14843	-0.274545	-2.06941	0.0465466	0.908208	0.87127	6 x 7	H	7 p21	MACC1, MET transcriptional regulator [Source:HGNC Symbol;Acc:HGNC:30215]
1659	ENSG00000143409	MINDY1	-0.449526	-0.187078	-2.08046	0.0466226	0.908208	0.871328	1 x 21		1 q21	MINDY lysine 48 deubiquitinase 1 [Source:HGNC Symbol;Acc:HGNC:25648]
1660	ENSG00000214318		0.204354	0.118906	2.06739	0.0466288	0.908208	0.871332	18 x 30		18 q21	ATP synthase, H+ transporting, mitochondrial Fo complex subunit C1 (subunit 9) pseudogene 6 [Source:HGNC Symbol;Acc:HGNC:39509]
1661	ENSG00000110693	SOX6	-0.855732	-0.268043	-2.06717	0.0466694	0.908208	0.871363	30 x 24	B	11 p15	SRY-box 6 [Source:HGNC Symbol;Acc:HGNC:16421]
1662	ENSG00000129173	E2F8	0.526364	0.349222	2.06741	0.0466768	0.908208	0.871369	40 x 26	A	11 p15	E2F transcription factor 8 [Source:HGNC Symbol;Acc:HGNC:24727]
1663	ENSG00000251350	LINC02475	-0.649608	-0.237409	-2.08047	0.046686	0.908208	0.871376	26 x 31		4 p13	long intergenic non-protein coding RNA 2475 [Source:HGNC Symbol;Acc:HGNC:53418]
1664	ENSG00000116198	CEP104	0.367097	0.228739	2.06876	0.0466924	0.908208	0.871381	25 x 17		1 p36	centrosomal protein 104 [Source:HGNC Symbol;Acc:HGNC:24866]
1665	ENSG00000170275	CRTAP	-0.360506	-0.158163	-2.0665	0.0467173	0.908208	0.871399	24 x 9		3 p22	cartilage associated protein [Source:HGNC Symbol;Acc:HGNC:2379]
1666	ENSG00000227719		-0.624519	-0.23221	-2.08518	0.0467192	0.908208	0.871401	4 x 26		7 p21
1667	ENSG00000167085	PHB	0.468813	0.304203	2.08091	0.0467684	0.908208	0.871438	39 x 32	A	17 q21	prohibitin [Source:HGNC Symbol;Acc:HGNC:8912]
1668	ENSG00000159063	ALG8	0.442117	0.28389	2.06821	0.0468347	0.908208	0.871488	19 x 40		11 q14	ALG8, alpha-1,3-glucosyltransferase [Source:HGNC Symbol;Acc:HGNC:23161]
1669	ENSG00000258525	LOC100506071	0.319995	0.195571	2.0784	0.0468528	0.908208	0.871501	17 x 29		14 q12
1670	ENSG00000188365		-0.351997	-0.155189	-2.07313	0.0468588	0.908208	0.871506	12 x 19		7 p22
1671	ENSG00000189058	APOD	-0.751636	-0.255263	-2.06856	0.0468723	0.908208	0.871516	14 x 1		3 q29	apolipoprotein D [Source:HGNC Symbol;Acc:HGNC:612]
1672	ENSG00000138767	CNOT6L	0.354406	0.219691	2.06674	0.0468956	0.908208	0.871534	2 x 12	I	4 q21	CCR4-NOT transcription complex subunit 6 like [Source:HGNC Symbol;Acc:HGNC:18042]
1673	ENSG00000261270		-0.332414	-0.148205	-2.07506	0.0468958	0.908208	0.871534	9 x 17		16 q13
1674	ENSG00000231613		-0.276935	-0.127363	-2.06963	0.0469108	0.908208	0.871545	14 x 12		1 p22
1675	ENSG00000197070	ARRDC1	0.432452	0.276624	2.06723	0.0469509	0.908208	0.871575	16 x 40		9 q34	arrestin domain containing 1 [Source:HGNC Symbol;Acc:HGNC:28633]
1676	ENSG00000164953	TMEM67	-0.439236	-0.183941	-2.06808	0.0470534	0.908208	0.871652	1 x 31		8 q22	transmembrane protein 67 [Source:HGNC Symbol;Acc:HGNC:28396]
1677	ENSG00000125505	MBOAT7	0.461417	0.298539	2.08924	0.0470741	0.908208	0.871667	21 x 14		19 q13	membrane bound O-acyltransferase domain containing 7 [Source:HGNC Symbol;Acc:HGNC:15505]
1678	ENSG00000137474	MYO7A	0.508097	0.334751	2.06305	0.0471133	0.908208	0.871696	34 x 5		11 q13	myosin VIIA [Source:HGNC Symbol;Acc:HGNC:7606]
1679	ENSG00000077942	FBLN1	-0.745395	-0.254323	-2.06304	0.0471153	0.908208	0.871698	20 x 4		22 q13	fibulin 1 [Source:HGNC Symbol;Acc:HGNC:3600]
1680	ENSG00000196914	ARHGEF12	-0.350847	-0.154784	-2.07725	0.0471434	0.908208	0.871719	4 x 7	H	11 q23	Rho guanine nucleotide exchange factor 12 [Source:HGNC Symbol;Acc:HGNC:14193]
1681	ENSG00000109756	RAPGEF2	-0.371313	-0.161887	-2.08013	0.0471469	0.908208	0.871721	6 x 7	H	4 q32	Rap guanine nucleotide exchange factor 2 [Source:HGNC Symbol;Acc:HGNC:16854]
1682	ENSG00000215717	TMEM167B	-0.318942	-0.143287	-2.08183	0.0472023	0.908208	0.871762	28 x 11		1 p13	transmembrane protein 167B [Source:HGNC Symbol;Acc:HGNC:30187]
1683	ENSG00000161981	SNRNP25	0.409383	0.259475	2.06217	0.0472556	0.908208	0.871802	40 x 40		16 p13	small nuclear ribonucleoprotein U11/U12 subunit 25 [Source:HGNC Symbol;Acc:HGNC:14161]
1684	ENSG00000164463	CREBRF	-0.419922	-0.177908	-2.0721	0.0472661	0.908208	0.87181	1 x 16	I	5 q35	CREB3 regulatory factor [Source:HGNC Symbol;Acc:HGNC:24050]
1685	ENSG00000257283	LOC105369911	-0.191113	-0.0920496	-2.06143	0.0472803	0.908208	0.87182	8 x 13		12 q22
1686	ENSG00000197150	ABCB8	0.316096	0.192875	2.0623	0.0473005	0.908208	0.871835	19 x 16		7 q36	ATP binding cassette subfamily B member 8 [Source:HGNC Symbol;Acc:HGNC:49]
1687	ENSG00000172380	GNG12	-0.387316	-0.167294	-2.0615	0.0473095	0.908208	0.871842	2 x 13	I	1 p31	G protein subunit gamma 12 [Source:HGNC Symbol;Acc:HGNC:19663]
1688	ENSG00000259917		0.326425	0.200032	2.06507	0.0473283	0.908208	0.871855	25 x 37		15 q14	heterogeneous nuclear ribonucleoprotein L pseudogene 2 [Source:HGNC Symbol;Acc:HGNC:48747]
1689	ENSG00000158286	RNF207	0.532967	0.354495	2.06041	0.0473898	0.908208	0.871901	8 x 26	J	1 p36	ring finger protein 207 [Source:HGNC Symbol;Acc:HGNC:32947]
1690	ENSG00000199172	MIR331	-0.344864	-0.152667	-2.06114	0.0474397	0.908208	0.871937	4 x 19		12 q22	microRNA 331 [Source:HGNC Symbol;Acc:HGNC:31772]
1691	ENSG00000279141	LINC01451	0.4809	0.313519	2.05912	0.0474473	0.908208	0.871943	16 x 10		9 q34	long intergenic non-protein coding RNA 1451 [Source:NCBI gene;Acc:401561]
1692	ENSG00000189362	NEMP2	0.441574	0.28348	2.05922	0.0474803	0.908208	0.871967	33 x 19		2 q32	nuclear envelope integral membrane protein 2 [Source:HGNC Symbol;Acc:HGNC:33700]
1693	ENSG00000106554	CHCHD3	0.36842	0.229687	2.07354	0.0474922	0.908208	0.871976	37 x 31		7 q33	coiled-coil-helix-coiled-coil-helix domain containing 3 [Source:HGNC Symbol;Acc:HGNC:21906]
1694	ENSG00000104164	BLOC1S6	-0.297614	-0.135314	-2.05938	0.0474992	0.908208	0.871981	3 x 14		15 q21	biogenesis of lysosomal organelles complex 1 subunit 6 [Source:HGNC Symbol;Acc:HGNC:8549]
1695	ENSG00000141401	IMPA2	0.533975	0.355302	2.05913	0.0475077	0.908208	0.871987	40 x 23	C	18 p11	inositol monophosphatase 2 [Source:HGNC Symbol;Acc:HGNC:6051]
1696	ENSG00000233024	NPIPA5	0.248432	0.147328	2.06829	0.0475118	0.908208	0.87199	16 x 18		16 p12	nuclear pore complex-interacting protein family member A5 isoform 2 [Source:RefSeq peptide;Acc:NP_001338129]
1697	ENSG00000158711	ELK4	-0.301868	-0.136922	-2.05831	0.0475283	0.908208	0.872002	6 x 11		1 q32	ELK4, ETS transcription factor [Source:HGNC Symbol;Acc:HGNC:3326]
1698	ENSG00000142530	FAM71E1	0.489541	0.320224	2.08448	0.0475288	0.908208	0.872003	36 x 38		19 q13	family with sequence similarity 71 member E1 [Source:HGNC Symbol;Acc:HGNC:25107]
1699	ENSG00000132846	ZBED3	-0.495304	-0.200383	-2.06228	0.0475692	0.908208	0.872032	4 x 18		5 q13	zinc finger BED-type containing 3 [Source:HGNC Symbol;Acc:HGNC:20711]
1700	ENSG00000259644		-0.311904	-0.140682	-2.06248	0.0476425	0.908208	0.872086	9 x 20		15 q13
1701	ENSG00000267645	POLR2J2	0.78766	0.574736	2.06981	0.0476739	0.908208	0.872109	17 x 15		7 q22	RNA polymerase II subunit J2 [Source:NCBI gene;Acc:246721]
1702	ENSG00000213213	CCDC183	0.473047	0.307458	2.05752	0.0476741	0.908208	0.872109	7 x 31		9 q34	coiled-coil domain containing 183 [Source:HGNC Symbol;Acc:HGNC:28236]
1703	ENSG00000136010	ALDH1L2	-0.845924	-0.267073	-2.0672	0.0476851	0.908208	0.872117	24 x 4	G	12 q23	aldehyde dehydrogenase 1 family member L2 [Source:HGNC Symbol;Acc:HGNC:26777]
1704	ENSG00000162738	VANGL2	-0.634361	-0.234288	-2.05666	0.0476958	0.908208	0.872124	29 x 24		1 q23	VANGL planar cell polarity protein 2 [Source:HGNC Symbol;Acc:HGNC:15511]
1705	ENSG00000154065	ANKRD29	-0.629098	-0.233183	-2.06351	0.0477639	0.908208	0.872174	13 x 1		18 q11	ankyrin repeat domain 29 [Source:HGNC Symbol;Acc:HGNC:27110]
1706	ENSG00000255624		0.582208	0.394512	2.05599	0.047825	0.908208	0.872218	37 x 26	A	10 q26
1707	ENSG00000260352		0.434299	0.278009	2.05871	0.0478948	0.908208	0.872268	34 x 13		16 p12
1708	ENSG00000140939	NOL3	0.527699	0.350287	2.05454	0.0479687	0.908208	0.872322	16 x 39		16 q22	nucleolar protein 3 [Source:HGNC Symbol;Acc:HGNC:7869]
1709	ENSG00000164512	ANKRD55	-0.294141	-0.133994	-2.06286	0.0479731	0.908208	0.872325	33 x 8		5 q11	ankyrin repeat domain 55 [Source:HGNC Symbol;Acc:HGNC:25681]
1710	ENSG00000130711	PRDM12	0.35414	0.219503	2.05493	0.0479875	0.908208	0.872335	25 x 14		9 q34	PR/SET domain 12 [Source:HGNC Symbol;Acc:HGNC:13997]
1711	ENSG00000162441	LZIC	0.420244	0.267515	2.05369	0.0480038	0.908208	0.872347	2 x 15	I	1 p36	leucine zipper and CTNNBIP1 domain containing [Source:HGNC Symbol;Acc:HGNC:17497]
1712	ENSG00000237840		0.453595	0.292579	2.05329	0.0480405	0.908208	0.872373	7 x 32		10 q11	family with sequence similarity 21 member F, pseudogene [Source:HGNC Symbol;Acc:HGNC:45011]
1713	ENSG00000166823	MESP1	1.1592	0.954974	2.06556	0.0480524	0.908208	0.872382	40 x 38		15 q26	mesoderm posterior bHLH transcription factor 1 [Source:HGNC Symbol;Acc:HGNC:29658]
1714	ENSG00000279526		-0.251703	-0.117368	-2.05315	0.048058	0.908208	0.872386	14 x 9		2 p24
1715	ENSG00000279140		0.676545	0.474609	2.05368	0.0480828	0.908208	0.872403	32 x 34		14 q32
1716	ENSG00000253559		0.359963	0.223643	2.05656	0.0482072	0.908208	0.872492	17 x 27		2 q32	OSGEPL1 antisense RNA 1 [Source:HGNC Symbol;Acc:HGNC:41009]
1717	ENSG00000164037	SLC9B1	-0.309559	-0.139808	-2.05154	0.0482231	0.908208	0.872504	20 x 35		4 q24	solute carrier family 9 member B1 [Source:HGNC Symbol;Acc:HGNC:24244]
1718	ENSG00000196345	ZKSCAN7	-0.614428	-0.230029	-2.05483	0.0482289	0.908208	0.872508	8 x 2		3 p21	zinc finger with KRAB and SCAN domains 7 [Source:HGNC Symbol;Acc:HGNC:12955]
1719	ENSG00000226944	LOC102724450	0.556698	0.373627	2.05805	0.0482405	0.908208	0.872516	31 x 36		1 p36
1720	ENSG00000226086		-0.228642	-0.107951	-2.07941	0.0482709	0.908208	0.872537	17 x 33		10 p11	eukaryotic translation initiation factor 3 subunit L pseudogene 3 [Source:HGNC Symbol;Acc:HGNC:44976]
1721	ENSG00000266931		-0.548699	-0.214561	-2.05186	0.0482739	0.908208	0.87254	25 x 21		2 p11
1722	ENSG00000224204	PHEX-AS1	0.271721	0.162743	2.064	0.0483198	0.908208	0.872572	14 x 11		X p22	PHEX antisense RNA 1 [Source:HGNC Symbol;Acc:HGNC:40445]
1723	ENSG00000135452	TSPAN31	-0.362309	-0.158788	-2.05066	0.0483294	0.908208	0.872579	17 x 39		12 q14	tetraspanin 31 [Source:HGNC Symbol;Acc:HGNC:10539]
1724	ENSG00000232216		-1.21557	-0.269914	-2.06955	0.048418	0.908208	0.872642	40 x 1	E	14 q32	immunoglobulin heavy variable 3-43 [Source:HGNC Symbol;Acc:HGNC:5604]
1725	ENSG00000240710		-0.490212	-0.198956	-2.05266	0.0484495	0.908208	0.872664	6 x 21		1 q32
1726	ENSG00000241135	LINC00881	0.300869	0.182423	2.05469	0.0484735	0.908208	0.872681	35 x 15		3 q25	long intergenic non-protein coding RNA 881 [Source:HGNC Symbol;Acc:HGNC:48567]
1727	ENSG00000275833		-0.278741	-0.128066	-2.0504	0.0485032	0.908208	0.872702	8 x 19		7 q11
1728	ENSG00000153487	ING1	-0.425488	-0.179666	-2.04853	0.0485346	0.908208	0.872724	17 x 29		13 q34	inhibitor of growth family member 1 [Source:HGNC Symbol;Acc:HGNC:6062]
1729	ENSG00000245213	LOC101930370	-0.496001	-0.200578	-2.08199	0.0485359	0.908208	0.872725	7 x 33		4 q34
1730	ENSG00000182095	TNRC18	-0.418075	-0.177321	-2.04847	0.0485693	0.908208	0.872748	21 x 18		7 p22	trinucleotide repeat containing 18 [Source:HGNC Symbol;Acc:HGNC:11962]
1731	ENSG00000279361		-0.446922	-0.186289	-2.04969	0.0485728	0.908208	0.872751	13 x 20		17 q24
1732	ENSG00000226933		0.209423	0.122124	2.05392	0.0485963	0.908208	0.872767	19 x 32		3 p21	nuclear receptor binding factor 2 pseudogene 2 [Source:HGNC Symbol;Acc:HGNC:44605]
1733	ENSG00000119684	MLH3	0.379258	0.237485	2.04872	0.0486036	0.908208	0.872772	4 x 18		14 q24	mutL homolog 3 [Source:HGNC Symbol;Acc:HGNC:7128]
1734	ENSG00000236166		-0.305067	-0.138126	-2.04773	0.048614	0.908208	0.872779	14 x 8		6 q23
1735	ENSG00000274678		0.304197	0.184697	2.05295	0.0486213	0.908208	0.872785	11 x 32		16 p11
1736	ENSG00000184470	TXNRD2	0.378213	0.236731	2.0479	0.0486492	0.908208	0.872804	20 x 15		22 q11	thioredoxin reductase 2 [Source:HGNC Symbol;Acc:HGNC:18155]
1737	ENSG00000144847	IGSF11	-0.86534	-0.268945	-2.06137	0.0486533	0.908208	0.872807	25 x 29		3 q13	immunoglobulin superfamily member 11 [Source:HGNC Symbol;Acc:HGNC:16669]
1738	ENSG00000172350	ABCG4	-0.657926	-0.239062	-2.06665	0.0486555	0.908208	0.872808	19 x 10		11 q23	ATP binding cassette subfamily G member 4 [Source:HGNC Symbol;Acc:HGNC:13884]
1739	ENSG00000140403	DNAJA4	0.633652	0.437631	2.05025	0.0486917	0.908208	0.872834	27 x 13		15 q25	DnaJ heat shock protein family (Hsp40) member A4 [Source:HGNC Symbol;Acc:HGNC:14885]
1740	ENSG00000227962		0.333055	0.204654	2.05583	0.048711	0.908208	0.872847	7 x 19		1 q42
1741	ENSG00000148459	PDSS1	0.419024	0.266609	2.05195	0.048736	0.908208	0.872865	37 x 28		10 p12	decaprenyl diphosphate synthase subunit 1 [Source:HGNC Symbol;Acc:HGNC:17759]
1742	ENSG00000179133	C10orf67	0.709429	0.503589	2.05126	0.0487692	0.908208	0.872888	1 x 31		10 p12	chromosome 10 open reading frame 67 [Source:HGNC Symbol;Acc:HGNC:28716]
1743	ENSG00000242173	ARHGDIG	0.99859	0.782023	2.05452	0.0487752	0.908208	0.872892	31 x 30		16 p13	Rho GDP dissociation inhibitor gamma [Source:HGNC Symbol;Acc:HGNC:680]
1744	ENSG00000196683	TOMM7	-0.605211	-0.227992	-2.05644	0.0487802	0.908208	0.872895	33 x 40		7 p15	translocase of outer mitochondrial membrane 7 [Source:HGNC Symbol;Acc:HGNC:21648]
1745	ENSG00000106066	CPVL	-0.806259	-0.262654	-2.0517	0.048794	0.908208	0.872905	31 x 4		7 p14	carboxypeptidase, vitellogenic like [Source:HGNC Symbol;Acc:HGNC:14399]
1746	ENSG00000272195		0.462088	0.299052	2.04685	0.0487997	0.908208	0.872909	8 x 30		1 q44
1747	ENSG00000177675	CD163L1	-0.752018	-0.25532	-2.05549	0.0488202	0.908208	0.872923	36 x 8		12 p13	CD163 molecule like 1 [Source:HGNC Symbol;Acc:HGNC:30375]
1748	ENSG00000224126		0.451515	0.290999	2.06072	0.0488211	0.908208	0.872924	37 x 30		17 p11
1749	ENSG00000057704	TMCC3	-1.14047	-0.274942	-2.05252	0.0488675	0.908208	0.872956	9 x 6		12 q22	transmembrane and coiled-coil domain family 3 [Source:HGNC Symbol;Acc:HGNC:29199]
1750	ENSG00000267368	UPK3BL1	1.37376	1.20643	2.04573	0.0488848	0.908208	0.872968	31 x 31		7 q22	uroplakin 3B like 1 [Source:HGNC Symbol;Acc:HGNC:37278]
1751	ENSG00000227066		-0.831147	-0.26552	-2.06884	0.0489206	0.908208	0.872993	36 x 11		1 p36
1752	ENSG00000182378	PLCXD1	0.562174	0.378082	2.04666	0.0489275	0.908208	0.872998	36 x 27	B	X p22	phosphatidylinositol specific phospholipase C X domain containing 1 [Source:HGNC Symbol;Acc:HGNC:23148]
1753	ENSG00000164109	MAD2L1	0.636237	0.439834	2.05221	0.0489625	0.908208	0.873022	40 x 27	A	4 q27	mitotic arrest deficient 2 like 1 [Source:HGNC Symbol;Acc:HGNC:6763]
1754	ENSG00000279135		0.237725	0.140334	2.04399	0.0490108	0.908208	0.873055	17 x 28		13 q12
1755	ENSG00000152409	JMY	-0.413739	-0.175937	-2.05104	0.0490773	0.908208	0.873101	5 x 11		5 q14	junction mediating and regulatory protein, p53 cofactor [Source:HGNC Symbol;Acc:HGNC:28916]
1756	ENSG00000132205	EMILIN2	-0.799887	-0.26187	-2.05243	0.0491004	0.908208	0.873117	33 x 4		18 p11	elastin microfibril interfacer 2 [Source:HGNC Symbol;Acc:HGNC:19881]
1757	ENSG00000026950	BTN3A1	-0.489881	-0.198863	-2.04712	0.0491008	0.908208	0.873117	38 x 7	E	6 p22	butyrophilin subfamily 3 member A1 [Source:HGNC Symbol;Acc:HGNC:1138]
1758	ENSG00000133256	PDE6B	0.635681	0.43936	2.04313	0.0491334	0.908208	0.873139	5 x 35		4 p16	phosphodiesterase 6B [Source:HGNC Symbol;Acc:HGNC:8786]
1759	ENSG00000005022	SLC25A5	0.415696	0.264141	2.04277	0.0491916	0.908208	0.873179	39 x 31	A	X q24	solute carrier family 25 member 5 [Source:HGNC Symbol;Acc:HGNC:10991]
1760	ENSG00000149262	INTS4	0.343602	0.212054	2.04808	0.0492015	0.908208	0.873186	26 x 17		11 q14	integrator complex subunit 4 [Source:HGNC Symbol;Acc:HGNC:25048]
1761	ENSG00000196074	SYCP2	1.1617	0.957773	2.04592	0.0492822	0.908208	0.873241	1 x 18		20 q13	synaptonemal complex protein 2 [Source:HGNC Symbol;Acc:HGNC:11490]
1762	ENSG00000258815		-0.999176	-0.276654	-2.05027	0.049387	0.908208	0.873313	26 x 30		12 q21
1763	ENSG00000249215		0.153712	0.087467	2.06296	0.0493884	0.908208	0.873314	9 x 12		5 q31	nuclear receptor coactivator 4 pseudogene 4 [Source:HGNC Symbol;Acc:HGNC:52405]
1764	ENSG00000165283	STOML2	0.45186	0.291261	2.04164	0.0494007	0.908208	0.873322	37 x 33		9 p13	stomatin like 2 [Source:HGNC Symbol;Acc:HGNC:14559]
1765	ENSG00000243422		0.695687	0.491412	2.04034	0.0494102	0.908208	0.873328	23 x 25		3 p12	ribosomal protein L23a pseudogene 49 [Source:HGNC Symbol;Acc:HGNC:35689]
1766	ENSG00000261207		-0.39215	-0.168901	-2.03926	0.0495408	0.908208	0.873417	7 x 23		16 p13
1767	ENSG00000084090	STARD7	0.352542	0.218369	2.05434	0.0495639	0.908208	0.873432	29 x 17		2 q11	StAR related lipid transfer domain containing 7 [Source:HGNC Symbol;Acc:HGNC:18063]
1768	ENSG00000143190	POU2F1	-0.274322	-0.126343	-2.03998	0.049564	0.908208	0.873432	4 x 19		1 q24	POU class 2 homeobox 1 [Source:HGNC Symbol;Acc:HGNC:9212]
1769	ENSG00000168243	GNG4	1.11417	0.905174	2.04567	0.0495822	0.908208	0.873445	30 x 26		1 q42	G protein subunit gamma 4 [Source:HGNC Symbol;Acc:HGNC:4407]
1770	ENSG00000258630	LINC02292	0.263183	0.15706	2.04835	0.0495916	0.908208	0.873451	9 x 34		14 q32	long intergenic non-protein coding RNA 2292 [Source:HGNC Symbol;Acc:HGNC:53208]
1771	ENSG00000213471	TTLL13P	0.281122	0.169043	2.04066	0.0496341	0.908208	0.87348	11 x 32		15 q26	tubulin tyrosine ligase like 13, pseudogene [Source:HGNC Symbol;Acc:HGNC:32484]
1772	ENSG00000047644	WWC3	-0.351886	-0.15515	-2.04193	0.0496421	0.908208	0.873485	24 x 8		X p22	WWC family member 3 [Source:HGNC Symbol;Acc:HGNC:29237]
1773	ENSG00000256817		-0.224623	-0.106282	-2.0377	0.0496701	0.908208	0.873504	24 x 36		12 p13	tumor protein, translationally-controlled 1 pseudogene 12 [Source:HGNC Symbol;Acc:HGNC:49303]
1774	ENSG00000144231	POLR2D	0.372001	0.232257	2.03795	0.0496819	0.908208	0.873512	30 x 18		2 q14	RNA polymerase II subunit D [Source:HGNC Symbol;Acc:HGNC:9191]
1775	ENSG00000143067	ZNF697	-0.488827	-0.198565	-2.03655	0.0497854	0.908208	0.873581	20 x 7		1 p12	zinc finger protein 697 [Source:HGNC Symbol;Acc:HGNC:32034]
1776	ENSG00000237339	LINC01502	-0.755809	-0.255881	-2.03875	0.0498073	0.908208	0.873596	34 x 12		9 q34	long intergenic non-protein coding RNA 1502 [Source:HGNC Symbol;Acc:HGNC:51183]
1777	ENSG00000073737	DHRS9	-1.05634	-0.27718	-2.08939	0.0498075	0.908208	0.873596	31 x 1	F	2 q31	dehydrogenase/reductase 9 [Source:HGNC Symbol;Acc:HGNC:16888]
1778	ENSG00000229204		0.316192	0.192942	2.04076	0.0498186	0.908208	0.873603	28 x 15		4 q33	prostaglandin E synthase 3 pseudogene 3 [Source:HGNC Symbol;Acc:HGNC:43823]
1779	ENSG00000197343	ZNF655	-0.666296	-0.24069	-2.0511	0.0498712	0.908208	0.873639	1 x 25		7 q22	zinc finger protein 655 [Source:HGNC Symbol;Acc:HGNC:30899]
1780	ENSG00000099977	DDT	0.524907	0.348062	2.03607	0.0499015	0.908208	0.873659	39 x 37		22 q11	D-dopachrome tautomerase [Source:HGNC Symbol;Acc:HGNC:2732]
1781	ENSG00000272345		-0.402218	-0.172211	-2.03538	0.0499088	0.908208	0.873664	14 x 30		6 p22
1782	ENSG00000204387	C6orf48	-0.677331	-0.242782	-2.064	0.0499412	0.908208	0.873685	33 x 40		6 p21	chromosome 6 open reading frame 48 [Source:HGNC Symbol;Acc:HGNC:19078]
1783	ENSG00000236514		0.444729	0.285861	2.0351	0.0499453	0.908208	0.873688	9 x 13		10 p11
1784	ENSG00000248597		0.245366	0.14532	2.06848	0.0499607	0.908208	0.873698	11 x 10		5 p15
1785	ENSG00000227300		-0.290283	-0.13252	-2.05128	0.0499777	0.908208	0.873709	36 x 17		17 p11	keratin 16 pseudogene 2 [Source:HGNC Symbol;Acc:HGNC:37807]
1786	ENSG00000070010	UFD1	0.288907	0.174295	2.04216	0.0499905	0.908208	0.873718	39 x 33	A	22 q11	ubiquitin recognition factor in ER associated degradation 1 [Source:HGNC Symbol;Acc:HGNC:12520]
1787	ENSG00000169372	CRADD	-0.354505	-0.156069	-2.03841	0.0500461	0.908208	0.873755	19 x 39		12 q22	CASP2 and RIPK1 domain containing adaptor with death domain [Source:HGNC Symbol;Acc:HGNC:2340]
1788	ENSG00000188811	NHLRC3	0.313803	0.191294	2.03738	0.0500773	0.908208	0.873775	5 x 16		13 q13	NHL repeat containing 3 [Source:HGNC Symbol;Acc:HGNC:33751]
1789	ENSG00000103876	FAH	0.675404	0.473614	2.03513	0.0501016	0.908208	0.873792	17 x 40		15 q25	fumarylacetoacetate hydrolase [Source:HGNC Symbol;Acc:HGNC:3579]
1790	ENSG00000188993	LRRC66	0.505672	0.332843	2.03386	0.0501058	0.908208	0.873794	13 x 28		4 q12	leucine rich repeat containing 66 [Source:HGNC Symbol;Acc:HGNC:34299]
1791	ENSG00000157326	DHRS4	0.363875	0.226434	2.0333	0.0501803	0.908208	0.873843	17 x 40		14 q11	dehydrogenase/reductase 4 [Source:HGNC Symbol;Acc:HGNC:16985]
1792	ENSG00000113296	THBS4	-0.812886	-0.263448	-2.04254	0.0501953	0.908208	0.873853	11 x 1		5 q14	thrombospondin 4 [Source:HGNC Symbol;Acc:HGNC:11788]
1793	ENSG00000107611	CUBN	-0.525486	-0.208575	-2.03586	0.0502347	0.908208	0.873879	11 x 4		10 p13	cubilin [Source:HGNC Symbol;Acc:HGNC:2548]
1794	ENSG00000119471	HSDL2	0.517582	0.342244	2.03487	0.0502416	0.908208	0.873884	10 x 37		9 q32	hydroxysteroid dehydrogenase like 2 [Source:HGNC Symbol;Acc:HGNC:18572]
1795	ENSG00000271550		-0.495059	-0.200315	-2.07184	0.0503143	0.908208	0.873932	15 x 18		7 q11	BCL2 interacting protein 3 pseudogene 11 [Source:HGNC Symbol;Acc:HGNC:49724]
1796	ENSG00000172346	CSDC2	-1.00919	-0.276866	-2.0394	0.0503395	0.908208	0.873948	7 x 1		22 q13	cold shock domain containing C2 [Source:HGNC Symbol;Acc:HGNC:30359]
1797	ENSG00000240731		0.451697	0.291137	2.03103	0.0503726	0.908208	0.87397	9 x 26		1 p36
1798	ENSG00000273473		0.489129	0.319904	2.03771	0.050382	0.908208	0.873976	8 x 32		9 q34
1799	ENSG00000185065		0.447178	0.287713	2.04152	0.0503914	0.908208	0.873982	30 x 33		22 q11
1800	ENSG00000258100		-0.402253	-0.172223	-2.03844	0.0504683	0.908208	0.874032	12 x 10		12 q21
1801	ENSG00000173406	DAB1	-1.00062	-0.276688	-2.08351	0.0504777	0.908208	0.874038	5 x 1		1 p32	DAB1, reelin adaptor protein [Source:HGNC Symbol;Acc:HGNC:2661]
1802	ENSG00000133835	HSD17B4	-0.422751	-0.178803	-2.03133	0.0504943	0.908208	0.874049	11 x 37		5 q23	hydroxysteroid 17-beta dehydrogenase 4 [Source:HGNC Symbol;Acc:HGNC:5213]
1803	ENSG00000162928	PEX13	0.228955	0.134648	2.03186	0.0505225	0.908208	0.874067	31 x 16		2 p15	peroxisomal biogenesis factor 13 [Source:HGNC Symbol;Acc:HGNC:8855]
1804	ENSG00000096696	DSP	-0.528459	-0.209357	-2.03247	0.0505951	0.908208	0.874115	5 x 10		6 p24	desmoplakin [Source:HGNC Symbol;Acc:HGNC:3052]
1805	ENSG00000254023		0.304595	0.18497	2.03379	0.0506049	0.908208	0.874121	25 x 37		8 q21	pyruvate kinase, muscle pseudogene 4 [Source:HGNC Symbol;Acc:HGNC:44246]
1806	ENSG00000259630		0.296071	0.179154	2.0287	0.0506237	0.908208	0.874133	16 x 28		15 q25
1807	ENSG00000232608		-0.273725	-0.12611	-2.03911	0.0506598	0.908208	0.874156	11 x 20		21 q22	TIMM9 pseudogene 2 [Source:HGNC Symbol;Acc:HGNC:39929]
1808	ENSG00000237719		-0.263192	-0.121959	-2.05001	0.0506701	0.908208	0.874163	10 x 19		6 p21
1809	ENSG00000268790		0.294925	0.178375	2.03732	0.0507235	0.908208	0.874198	26 x 35		19 p13
1810	ENSG00000166508	MCM7	0.490018	0.320595	2.02861	0.0507449	0.908208	0.874211	38 x 27	A	7 q22	minichromosome maintenance complex component 7 [Source:HGNC Symbol;Acc:HGNC:6950]
1811	ENSG00000100528	CNIH1	0.352924	0.218641	2.03498	0.0507784	0.908208	0.874233	21 x 39		14 q22	cornichon family AMPA receptor auxiliary protein 1 [Source:HGNC Symbol;Acc:HGNC:19431]
1812	ENSG00000164778	EN2	0.728584	0.520723	2.02758	0.0507845	0.908208	0.874237	37 x 18		7 q36	engrailed homeobox 2 [Source:HGNC Symbol;Acc:HGNC:3343]
1813	ENSG00000250421		-0.605539	-0.228065	-2.03219	0.0507926	0.908208	0.874242	25 x 30		5 q13
1814	ENSG00000008311	AASS	-0.714143	-0.249315	-2.02708	0.0508058	0.908208	0.874251	6 x 3		7 q31	aminoadipate-semialdehyde synthase [Source:HGNC Symbol;Acc:HGNC:17366]
1815	ENSG00000255065		-0.225313	-0.106569	-2.05469	0.0508183	0.908208	0.874259	26 x 11		11 q22
1816	ENSG00000117676	RPS6KA1	0.473521	0.307822	2.03403	0.0508233	0.908208	0.874262	21 x 13		1 p36	ribosomal protein S6 kinase A1 [Source:HGNC Symbol;Acc:HGNC:10430]
1817	ENSG00000136868	SLC31A1	0.423603	0.270014	2.02713	0.050919	0.908208	0.874323	27 x 11		9 q32	solute carrier family 31 member 1 [Source:HGNC Symbol;Acc:HGNC:11016]
1818	ENSG00000251468		0.421102	0.268153	2.02694	0.0509222	0.908208	0.874325	14 x 34		8 p22
1819	ENSG00000239468		0.273822	0.164147	2.02665	0.0509751	0.908208	0.874359	13 x 16		7 q36	RNA, 7SL, cytoplasmic 569, pseudogene [Source:HGNC Symbol;Acc:HGNC:46585]
1820	ENSG00000264196		-0.240821	-0.112958	-2.02966	0.0510344	0.908208	0.874397	12 x 18		17 q24
1821	ENSG00000248965		-0.468559	-0.192739	-2.03449	0.0510363	0.908208	0.874398	15 x 29		5 q34
1822	ENSG00000233337		-0.532221	-0.21034	-2.04775	0.0511004	0.908208	0.874439	13 x 26		1 p13	ubiquitin conjugating enzyme E2 F (putative) pseudogene 3 [Source:HGNC Symbol;Acc:HGNC:44537]
1823	ENSG00000246859	STARD4-AS1	-0.560647	-0.217536	-2.0242	0.0511324	0.908208	0.87446	6 x 21		5 q22	STARD4 antisense RNA 1 [Source:HGNC Symbol;Acc:HGNC:44117]
1824	ENSG00000279500		-0.311372	-0.140483	-2.03067	0.051198	0.908208	0.874501	6 x 22		12 q24
1825	ENSG00000105270	CLIP3	-0.668372	-0.241088	-2.02349	0.0512252	0.908208	0.874518	8 x 1		19 q13	CAP-Gly domain containing linker protein 3 [Source:HGNC Symbol;Acc:HGNC:24314]
1826	ENSG00000260001	TGFBR3L	0.934813	0.716969	2.02768	0.051227	0.908208	0.87452	32 x 34		19 p13	transforming growth factor beta receptor 3 like [Source:HGNC Symbol;Acc:HGNC:44152]
1827	ENSG00000264070		0.56902	0.383674	2.03143	0.0512331	0.908208	0.874523	17 x 23		17 q21
1828	ENSG00000279539		0.496167	0.325392	2.02266	0.0512738	0.908208	0.874549	25 x 15		19 q13
1829	ENSG00000259542		-0.284185	-0.130175	-2.02414	0.0512818	0.908208	0.874554	14 x 10		15 q26
1830	ENSG00000253187	HOXA10-AS	0.5746	0.388249	2.02768	0.051312	0.908208	0.874573	18 x 9		7 p15	HOXA10 antisense RNA [Source:HGNC Symbol;Acc:HGNC:40281]
1831	ENSG00000143748	NVL	0.274749	0.164768	2.02823	0.0513453	0.908208	0.874594	28 x 18		1 q42	nuclear VCP-like [Source:HGNC Symbol;Acc:HGNC:8070]
1832	ENSG00000115317	HTRA2	0.21314	0.124493	2.02234	0.05136	0.908208	0.874604	34 x 33		2 p13	HtrA serine peptidase 2 [Source:HGNC Symbol;Acc:HGNC:14348]
1833	ENSG00000182676	PPP1R27	0.319437	0.195184	2.04182	0.0513822	0.908208	0.874618	29 x 33		17 q25	protein phosphatase 1 regulatory subunit 27 [Source:HGNC Symbol;Acc:HGNC:16813]
1834	ENSG00000167617	CDC42EP5	0.753717	0.543486	2.02115	0.0514487	0.908208	0.874659	16 x 4		19 q13	CDC42 effector protein 5 [Source:HGNC Symbol;Acc:HGNC:17408]
1835	ENSG00000241622		0.575474	0.388967	2.02271	0.0514758	0.908208	0.874676	23 x 24		3 p12	retinoic acid receptor responder 2 pseudogene 1 [Source:HGNC Symbol;Acc:HGNC:48700]
1836	ENSG00000261338		-0.42924	-0.180842	-2.0254	0.0516076	0.908208	0.874759	14 x 34		2 q35
1837	ENSG00000207370		-0.189263	-0.091247	-2.02237	0.0516285	0.908208	0.874772	9 x 14		3 q29	Y RNA [Source:RFAM;Acc:RF00019]
1838	ENSG00000206936		0.237703	0.140319	2.02086	0.0516639	0.908208	0.874794	16 x 20		X p11	RNA, U4 small nuclear 52, pseudogene [Source:HGNC Symbol;Acc:HGNC:46988]
1839	ENSG00000188493	C19orf54	0.313012	0.190749	2.03545	0.0517094	0.908208	0.874822	18 x 15		19 q13	chromosome 19 open reading frame 54 [Source:HGNC Symbol;Acc:HGNC:24758]
1840	ENSG00000198324	FAM109A	-0.413455	-0.175845	-2.01869	0.0517102	0.908208	0.874823	21 x 11		12 q24	family with sequence similarity 109 member A [Source:HGNC Symbol;Acc:HGNC:26509]
1841	ENSG00000116690	PRG4	-1.2289	-0.268723	-2.04178	0.0517914	0.908208	0.874873	16 x 1	G	1 q31	proteoglycan 4 [Source:HGNC Symbol;Acc:HGNC:9364]
1842	ENSG00000279970		0.567928	0.38278	2.01778	0.0518061	0.908208	0.874882	1 x 3	H	15 q26
1843	ENSG00000213090		0.215359	0.12591	2.02144	0.0518165	0.908208	0.874889	12 x 14		2 q33
1844	ENSG00000267784		-0.236295	-0.111106	-2.04589	0.0518254	0.908208	0.874894	13 x 11		2 q31
1845	ENSG00000259685		0.399878	0.252487	2.01725	0.0519207	0.908208	0.874953	35 x 16		15 q26
1846	ENSG00000260101	LOC101927402	-0.301358	-0.13673	-2.03803	0.0519367	0.908208	0.874963	32 x 11		2 p14
1847	ENSG00000274367		0.259531	0.15464	2.0238	0.0519949	0.908208	0.874999	18 x 22		16 p13
1848	ENSG00000183597	TANGO2	0.328163	0.201242	2.0248	0.0519978	0.908208	0.875001	23 x 12		22 q11	transport and golgi organization 2 homolog [Source:HGNC Symbol;Acc:HGNC:25439]
1849	ENSG00000181074	OR52N4	-0.353659	-0.155773	-2.02145	0.0520188	0.908208	0.875014	32 x 9		11 p15	olfactory receptor family 52 subfamily N member 4 (gene/pseudogene) [Source:HGNC Symbol;Acc:HGNC:15230]
1850	ENSG00000269925		0.372222	0.232416	2.03166	0.0520636	0.908208	0.875041	10 x 16		1 p36
1851	ENSG00000183160	TMEM119	-0.847179	-0.2672	-2.01632	0.0520704	0.908208	0.875045	20 x 1	G	12 q23	transmembrane protein 119 [Source:HGNC Symbol;Acc:HGNC:27884]
1852	ENSG00000105220	GPI	0.38063	0.238477	2.0345	0.0521127	0.908208	0.875071	40 x 31	A	19 q13	glucose-6-phosphate isomerase [Source:HGNC Symbol;Acc:HGNC:4458]
1853	ENSG00000197921	HES5	0.308787	0.187843	2.01498	0.0521211	0.908208	0.875076	18 x 11		1 p36	hes family bHLH transcription factor 5 [Source:HGNC Symbol;Acc:HGNC:19764]
1854	ENSG00000167807		0.384148	0.241023	2.01626	0.0521272	0.908208	0.87508	10 x 26		19 p13
1855	ENSG00000258231	LOC100506869	-0.360453	-0.158144	-2.03969	0.0521297	0.908208	0.875082	17 x 10		12 q14
1856	ENSG00000101624	CEP76	0.339803	0.209382	2.01478	0.0521814	0.908208	0.875113	29 x 19		18 p11	centrosomal protein 76 [Source:HGNC Symbol;Acc:HGNC:25727]
1857	ENSG00000259262		0.493862	0.323591	2.01434	0.052191	0.908208	0.875119	13 x 30		15 q26	NADH:ubiquinone oxidoreductase subunit A3 pseudogene 4 [Source:HGNC Symbol;Acc:HGNC:45053]
1858	ENSG00000108384	RAD51C	0.391944	0.24669	2.02291	0.0522094	0.908208	0.87513	38 x 30		17 q22	RAD51 paralog C [Source:HGNC Symbol;Acc:HGNC:9820]
1859	ENSG00000228914		-0.495416	-0.200415	-2.02166	0.0522297	0.908208	0.875143	18 x 26		9 q33	olfactory receptor family 1 subfamily H member 1 pseudogene [Source:HGNC Symbol;Acc:HGNC:8206]
1860	ENSG00000280336		-0.316431	-0.14236	-2.04209	0.05225	0.908208	0.875155	17 x 29		5 q31
1861	ENSG00000258572		-0.389348	-0.167971	-2.02604	0.0522877	0.908208	0.875178	35 x 8		14 q32
1862	ENSG00000281376	ABALON	-0.34317	-0.152065	-2.02091	0.0523224	0.908208	0.875199	24 x 17		20 q11	apoptotic BCL2L1-antisense long non-coding RNA [Source:HGNC Symbol;Acc:HGNC:49667]
1863	ENSG00000167968	DNASE1L2	0.597773	0.407417	2.01438	0.0523654	0.908208	0.875225	8 x 33		16 p13	deoxyribonuclease 1 like 2 [Source:HGNC Symbol;Acc:HGNC:2958]
1864	ENSG00000144857	BOC	-0.734133	-0.252575	-2.02701	0.0524006	0.908208	0.875247	10 x 5		3 q13	BOC cell adhesion associated, oncogene regulated [Source:HGNC Symbol;Acc:HGNC:17173]
1865	ENSG00000178412	LOC284241	0.260705	0.155417	2.0153	0.0524074	0.908208	0.875251	16 x 14		18 q23
1866	ENSG00000157985	AGAP1	-0.545566	-0.213769	-2.01385	0.0524078	0.908208	0.875251	5 x 7	H	2 q37	ArfGAP with GTPase domain, ankyrin repeat and PH domain 1 [Source:HGNC Symbol;Acc:HGNC:16922]
1867	ENSG00000251576	LINC01267	0.457338	0.295427	2.01855	0.0524183	0.908208	0.875257	21 x 27		3 p25	long intergenic non-protein coding RNA 1267 [Source:HGNC Symbol;Acc:HGNC:50320]
1868	ENSG00000267939		0.529051	0.351366	2.02309	0.0524286	0.908208	0.875264	32 x 36		19 p13
1869	ENSG00000228604		-0.257839	-0.119828	-2.01677	0.0524549	0.908208	0.87528	13 x 16		20 p11
1870	ENSG00000276545		-0.400859	-0.171768	-2.01358	0.0524551	0.908208	0.87528	13 x 19		5 q31
1871	ENSG00000140986	RPL3L	0.576729	0.389998	2.01462	0.0524607	0.908208	0.875283	31 x 33		16 p13	ribosomal protein L3 like [Source:HGNC Symbol;Acc:HGNC:10351]
1872	ENSG00000187079	TEAD1	-0.545486	-0.213749	-2.01123	0.0525306	0.908208	0.875325	4 x 7	H	11 p15	TEA domain transcription factor 1 [Source:HGNC Symbol;Acc:HGNC:11714]
1873	ENSG00000186684	CYP27C1	-0.703859	-0.247559	-2.02766	0.0525583	0.908208	0.875342	30 x 24	B	2 q14	cytochrome P450 family 27 subfamily C member 1 [Source:HGNC Symbol;Acc:HGNC:33480]
1874	ENSG00000146112	PPP1R18	-0.464493	-0.191545	-2.01361	0.0526117	0.908208	0.875374	30 x 2		6 p21	protein phosphatase 1 regulatory subunit 18 [Source:HGNC Symbol;Acc:HGNC:29413]
1875	ENSG00000119771	KLHL29	-0.569106	-0.219598	-2.00982	0.0526847	0.908208	0.875418	10 x 5		2 p24	kelch like family member 29 [Source:HGNC Symbol;Acc:HGNC:29404]
1876	ENSG00000250878	METTL21EP	-0.253862	-0.118236	-2.00985	0.0526953	0.908208	0.875424	13 x 32		13 q33	methyltransferase like 21E, pseudogene [Source:HGNC Symbol;Acc:HGNC:41948]
1877	ENSG00000163743	RCHY1	0.359746	0.223489	2.01176	0.0527161	0.908208	0.875437	30 x 15		4 q21	ring finger and CHY zinc finger domain containing 1 [Source:HGNC Symbol;Acc:HGNC:17479]
1878	ENSG00000257438		-0.463409	-0.191225	-2.01152	0.0527172	0.908208	0.875438	12 x 20		12 q23
1879	ENSG00000242485	MRPL20	0.44119	0.28319	2.01102	0.0527482	0.908208	0.875456	37 x 36		1 p36	mitochondrial ribosomal protein L20 [Source:HGNC Symbol;Acc:HGNC:14478]
1880	ENSG00000249413		-0.859099	-0.268364	-2.02263	0.0528248	0.908208	0.875502	26 x 31		4 q13
1881	ENSG00000106305	AIMP2	-0.407326	-0.173871	-2.0091	0.0528575	0.908208	0.875521	36 x 32		7 p22	aminoacyl tRNA synthetase complex interacting multifunctional protein 2 [Source:HGNC Symbol;Acc:HGNC:20609]
1882	ENSG00000003436	TFPI	-0.504625	-0.202962	-2.01801	0.0528736	0.908208	0.875531	16 x 3		2 q32	tissue factor pathway inhibitor [Source:HGNC Symbol;Acc:HGNC:11760]
1883	ENSG00000095203	EPB41L4B	0.686327	0.483172	2.00904	0.0528873	0.908208	0.875539	29 x 14		9 q31	erythrocyte membrane protein band 4.1 like 4B [Source:HGNC Symbol;Acc:HGNC:19818]
1884	ENSG00000014641	MDH1	0.314701	0.191913	2.00779	0.0529108	0.908208	0.875553	37 x 32		2 p15	malate dehydrogenase 1 [Source:HGNC Symbol;Acc:HGNC:6970]
1885	ENSG00000165802	NSMF	0.413176	0.262275	2.02149	0.0529246	0.908208	0.875561	20 x 18		9 q34	NMDA receptor synaptonuclear signaling and neuronal migration factor [Source:HGNC Symbol;Acc:HGNC:29843]
1886	ENSG00000261455		0.731174	0.523054	2.01942	0.0529902	0.908208	0.8756	31 x 34		7 q36	long intergenic non-protein coding RNA 1003 [Source:HGNC Symbol;Acc:HGNC:48957]
1887	ENSG00000180818	HOXC10	1.30538	1.12376	2.02556	0.0530184	0.908208	0.875617	22 x 7		12 q13	homeobox C10 [Source:HGNC Symbol;Acc:HGNC:5122]
1888	ENSG00000205359	SLCO6A1	-0.606242	-0.228222	-2.00873	0.053045	0.908208	0.875633	26 x 31		5 q21	solute carrier organic anion transporter family member 6A1 [Source:HGNC Symbol;Acc:HGNC:23613]
1889	ENSG00000214022	REPIN1	0.395143	0.249023	2.01107	0.0530468	0.908208	0.875634	21 x 17		7 q36	replication initiator 1 [Source:HGNC Symbol;Acc:HGNC:17922]
1890	ENSG00000235910	APOA1-AS	-0.256074	-0.119123	-2.00951	0.0530571	0.908208	0.87564	4 x 20		11 q23	APOA1 antisense RNA [Source:HGNC Symbol;Acc:HGNC:40079]
1891	ENSG00000140471	LINS1	0.334037	0.205341	2.00682	0.0530606	0.908208	0.875642	16 x 34		15 q26	lines homolog 1 [Source:HGNC Symbol;Acc:HGNC:30922]
1892	ENSG00000242085		0.364203	0.226669	2.0068	0.0530622	0.908208	0.875643	10 x 21		14 q32
1893	ENSG00000130204	TOMM40	0.479239	0.312234	2.00944	0.0530624	0.908208	0.875643	40 x 32	A	19 q13	translocase of outer mitochondrial membrane 40 [Source:HGNC Symbol;Acc:HGNC:18001]
1894	ENSG00000165934	CPSF2	0.32055	0.195954	2.00787	0.0531289	0.908208	0.875682	28 x 15		14 q32	cleavage and polyadenylation specific factor 2 [Source:HGNC Symbol;Acc:HGNC:2325]
1895	ENSG00000196890	HIST3H2BB	0.699263	0.494572	2.01826	0.0532	0.908208	0.875724	29 x 32		1 q42	histone cluster 3 H2B family member b [Source:HGNC Symbol;Acc:HGNC:20514]
1896	ENSG00000118689	FOXO3	-0.497679	-0.201045	-2.00888	0.053215	0.908208	0.875733	7 x 10		6 q21	forkhead box O3 [Source:HGNC Symbol;Acc:HGNC:3821]
1897	ENSG00000183655	KLHL25	0.5007	0.328939	2.00489	0.0532357	0.908208	0.875745	23 x 17		15 q25	kelch like family member 25 [Source:HGNC Symbol;Acc:HGNC:25732]
1898	ENSG00000135414	GDF11	-0.891582	-0.271172	-2.00806	0.0532412	0.908208	0.875748	28 x 29		12 q13	growth differentiation factor 11 [Source:HGNC Symbol;Acc:HGNC:4216]
1899	ENSG00000176194	CIDEA	-1.03201	-0.277159	-2.03752	0.0532489	0.908208	0.875753	15 x 1		18 p11	cell death-inducing DFFA-like effector a [Source:HGNC Symbol;Acc:HGNC:1976]
1900	ENSG00000184361	SPATA32	0.372839	0.23286	2.0059	0.0532536	0.908208	0.875756	16 x 20		17 q21	spermatogenesis associated 32 [Source:HGNC Symbol;Acc:HGNC:26349]
1901	ENSG00000197299	BLM	0.540795	0.360775	2.00911	0.0532605	0.908208	0.87576	40 x 26	A	15 q26	Bloom syndrome RecQ like helicase [Source:HGNC Symbol;Acc:HGNC:1058]
1902	ENSG00000157110	RBPMS	-0.718739	-0.250083	-2.01579	0.0532687	0.908208	0.875765	13 x 35		8 p12	RNA binding protein with multiple splicing [Source:HGNC Symbol;Acc:HGNC:19097]
1903	ENSG00000128849	CGNL1	-0.533939	-0.210786	-2.00453	0.0532767	0.908208	0.875769	4 x 5	H	15 q21	cingulin like 1 [Source:HGNC Symbol;Acc:HGNC:25931]
1904	ENSG00000196422	PPP1R26	0.32452	0.198708	2.00651	0.0533316	0.908208	0.875802	1 x 24		9 q34	protein phosphatase 1 regulatory subunit 26 [Source:HGNC Symbol;Acc:HGNC:29089]
1905	ENSG00000230061		-0.640457	-0.23555	-2.0129	0.053338	0.908208	0.875805	19 x 20		21 q22	TRPM2 antisense RNA [Source:HGNC Symbol;Acc:HGNC:50758]
1906	ENSG00000227388		0.508507	0.335074	2.00453	0.0533642	0.908208	0.875821	6 x 28		9 p13
1907	ENSG00000243918		-0.276858	-0.127333	-2.00404	0.0534137	0.908208	0.87585	24 x 36		3 q21	eukaryotic translation initiation factor 4B pseudogene 8 [Source:HGNC Symbol;Acc:HGNC:37941]
1908	ENSG00000271387		0.621505	0.427329	2.02703	0.0534417	0.908208	0.875866	31 x 34		1 q25
1909	ENSG00000230337	LOC105376736	0.625336	0.43057	2.00505	0.0534558	0.908208	0.875874	35 x 34		1 p36
1910	ENSG00000161860	SYCE2	0.555271	0.372468	2.00291	0.053459	0.908208	0.875876	31 x 32		19 p13	synaptonemal complex central element protein 2 [Source:HGNC Symbol;Acc:HGNC:27411]
1911	ENSG00000168079	SCARA5	-0.884297	-0.270589	-2.03557	0.0534706	0.908208	0.875883	13 x 1		8 p21	scavenger receptor class A member 5 [Source:HGNC Symbol;Acc:HGNC:28701]
1912	ENSG00000206140	TMEM191C	0.507272	0.334101	2.01499	0.0534909	0.908208	0.875895	29 x 35		22 q11	transmembrane protein 191C [Source:HGNC Symbol;Acc:HGNC:33601]
1913	ENSG00000262154		0.559288	0.375732	2.00411	0.0534995	0.908208	0.8759	16 x 19		16 p13	eukaryotic translation initiation factor 1 pseudogene 4 [Source:HGNC Symbol;Acc:HGNC:49617]
1914	ENSG00000260443		-0.266341	-0.123206	-2.00297	0.0536366	0.908208	0.875979	22 x 34		16 q24
1915	ENSG00000048052	HDAC9	-0.763872	-0.25705	-2.00721	0.0536703	0.908208	0.875999	35 x 11		7 p21	histone deacetylase 9 [Source:HGNC Symbol;Acc:HGNC:14065]
1916	ENSG00000145476	CYP4V2	-0.594098	-0.225479	-2.00603	0.0536757	0.908208	0.876002	13 x 37		4 q35	cytochrome P450 family 4 subfamily V member 2 [Source:HGNC Symbol;Acc:HGNC:23198]
1917	ENSG00000254398		-0.224451	-0.106211	-2.00103	0.053676	0.908208	0.876002	10 x 16		15 q13
1918	ENSG00000169288	MRPL1	0.440308	0.282526	2.00371	0.0537221	0.908208	0.876029	36 x 33		4 q21	mitochondrial ribosomal protein L1 [Source:HGNC Symbol;Acc:HGNC:14275]
1919	ENSG00000276547	PCDHGB5	-1.08991	-0.276717	-2.00335	0.0537736	0.908208	0.876058	5 x 5	H	5 q31	protocadherin gamma subfamily B, 5 [Source:HGNC Symbol;Acc:HGNC:8712]
1920	ENSG00000237775		0.21626	0.126486	2.02547	0.0537805	0.908208	0.876062	18 x 31		6 p21	DDR1 antisense RNA 1 (head to head) [Source:HGNC Symbol;Acc:HGNC:28694]
1921	ENSG00000203727	SAMD5	-0.690616	-0.245219	-2.01179	0.0537907	0.908208	0.876068	11 x 1		6 q24	sterile alpha motif domain containing 5 [Source:HGNC Symbol;Acc:HGNC:21180]
1922	ENSG00000260342		0.337266	0.207602	1.99973	0.0538316	0.908208	0.876092	22 x 38		16 p12
1923	ENSG00000247271	ZBED5-AS1	0.556105	0.373145	2.00284	0.0538348	0.908208	0.876094	17 x 40		11 p15	ZBED5 antisense RNA 1 [Source:HGNC Symbol;Acc:HGNC:48646]
1924	ENSG00000064726	BTBD1	0.312989	0.190733	2.00233	0.0538432	0.908208	0.876099	29 x 13		15 q25	BTB domain containing 1 [Source:HGNC Symbol;Acc:HGNC:1120]
1925	ENSG00000183654	2020-03-11	-0.925057	-0.273507	-2.05499	0.0538547	0.908208	0.876105	26 x 29		5 p15	membrane associated ring-CH-type finger 11 [Source:HGNC Symbol;Acc:HGNC:33609]
1926	ENSG00000101849	TBL1X	0.506662	0.333621	2.00068	0.053859	0.908208	0.876108	25 x 14		X p22	transducin beta like 1X-linked [Source:HGNC Symbol;Acc:HGNC:11585]
1927	ENSG00000189403	HMGB1	0.402683	0.254544	1.99899	0.053904	0.908208	0.876134	31 x 18		13 q12	high mobility group box 1 [Source:HGNC Symbol;Acc:HGNC:4983]
1928	ENSG00000237026		0.173311	0.0994799	2.00471	0.053906	0.908208	0.876135	19 x 33		7 q11
1929	ENSG00000276840		-0.506859	-0.203574	-1.99936	0.0539096	0.908208	0.876137	19 x 37		7 q11	PMS1 homolog 2, mismatch repair system component pseudogene 10 [Source:HGNC Symbol;Acc:HGNC:9124]
1930	ENSG00000213626	LBH	-0.414761	-0.176264	-2.00006	0.05393	0.908208	0.876148	28 x 4		2 p23	limb bud and heart development [Source:HGNC Symbol;Acc:HGNC:29532]
1931	ENSG00000279467		0.394939	0.248874	2.00758	0.0539573	0.908208	0.876164	11 x 20		22 q11
1932	ENSG00000013297	CLDN11	-0.794604	-0.261204	-1.99962	0.0539744	0.908208	0.876174	13 x 1		3 q26	claudin 11 [Source:HGNC Symbol;Acc:HGNC:8514]
1933	ENSG00000232936		0.335852	0.206612	1.99839	0.0539844	0.908208	0.87618	28 x 34		10 q23
1934	ENSG00000272682		0.304574	0.184956	2.01018	0.0540121	0.908208	0.876195	18 x 27		22 q11
1935	ENSG00000204946	ZNF783	0.453316	0.292367	2.00641	0.0540249	0.908208	0.876203	20 x 20		7 q36	zinc finger family member 783 [Source:HGNC Symbol;Acc:HGNC:27222]
1936	ENSG00000279613		0.604519	0.413048	2.00054	0.054039	0.908208	0.876211	10 x 23		17 q25
1937	ENSG00000243025		-0.256999	-0.119493	-1.99871	0.0540402	0.908208	0.876212	15 x 31		3 q25	methylthioadenosine phosphorylase pseudogene 1 [Source:HGNC Symbol;Acc:HGNC:42442]
1938	ENSG00000082014	SMARCD3	0.728622	0.520757	1.99832	0.054071	0.908208	0.876229	33 x 37		7 q36	SWI/SNF related, matrix associated, actin dependent regulator of chromatin, subfamily d, member 3 [Source:HGNC Symbol;Acc:HGNC:11108]
1939	ENSG00000250222		0.526264	0.349143	2.00182	0.054073	0.908208	0.87623	32 x 36		5 q35
1940	ENSG00000164344	KLKB1	-0.623252	-0.231939	-2.05491	0.0540977	0.921438	0.876244	10 x 29		4 q35	kallikrein B1 [Source:HGNC Symbol;Acc:HGNC:6371]
1941	ENSG00000169946	ZFPM2	-0.837392	-0.26619	-1.99712	0.0541772	0.921438	0.876307	18 x 2	G	8 q22	zinc finger protein, FOG family member 2 [Source:HGNC Symbol;Acc:HGNC:16700]
1942	ENSG00000256053	APOPT1	0.411267	0.260865	1.99941	0.0541991	0.921438	0.876325	36 x 37		14 q32	apoptogenic 1, mitochondrial [Source:HGNC Symbol;Acc:HGNC:20492]
1943	ENSG00000234742		-0.55308	-0.21566	-1.9963	0.0542325	0.921438	0.876351	31 x 40		3 q29
1944	ENSG00000257704	INAFM1	0.423905	0.270239	1.99645	0.0542573	0.921438	0.876371	40 x 40		19 q13	InaF motif containing 1 [Source:HGNC Symbol;Acc:HGNC:27406]
1945	ENSG00000236432		-0.35671	-0.156841	-2.02389	0.0543074	0.921438	0.87641	21 x 29		2 q36
1946	ENSG00000173137	ADCK5	0.535721	0.356701	2.01107	0.0543157	0.921438	0.876417	40 x 35		8 q24	aarF domain containing kinase 5 [Source:HGNC Symbol;Acc:HGNC:21738]
1947	ENSG00000200204		-0.452041	-0.187836	-2.05355	0.0543693	0.921438	0.876459	17 x 31		16 p13	RNA, U1 small nuclear 22, pseudogene [Source:HGNC Symbol;Acc:HGNC:41963]
1948	ENSG00000251374		-0.245162	-0.114725	-1.99871	0.0544744	0.921438	0.876542	11 x 13		5 q14
1949	ENSG00000058673	ZC3H11A	-0.301287	-0.136703	-1.99294	0.0545916	0.921438	0.876633	5 x 12		1 q32	zinc finger CCCH-type containing 11A [Source:HGNC Symbol;Acc:HGNC:29093]
1950	ENSG00000074276	CDHR2	0.419359	0.266857	1.99615	0.0546289	0.921438	0.876662	18 x 20		5 q35	cadherin related family member 2 [Source:HGNC Symbol;Acc:HGNC:18231]
1951	ENSG00000179335	CLK3	0.278075	0.166997	1.9951	0.0546472	0.921438	0.876677	17 x 18		15 q24	CDC like kinase 3 [Source:HGNC Symbol;Acc:HGNC:2071]
1952	ENSG00000236680		0.254268	0.151165	1.99211	0.0546911	0.921438	0.876711	16 x 33		9 p22
1953	ENSG00000121057	AKAP1	0.492531	0.322553	1.99152	0.0547727	0.921438	0.876774	25 x 16		17 q22	A-kinase anchoring protein 1 [Source:HGNC Symbol;Acc:HGNC:367]
1954	ENSG00000105364	MRPL4	0.413262	0.262339	1.99077	0.0548407	0.921438	0.876827	35 x 37		19 p13	mitochondrial ribosomal protein L4 [Source:HGNC Symbol;Acc:HGNC:14276]
1955	ENSG00000125991	ERGIC3	-0.308289	-0.139333	-1.99315	0.0548699	0.921438	0.87685	35 x 34		20 q11	ERGIC and golgi 3 [Source:HGNC Symbol;Acc:HGNC:15927]
1956	ENSG00000214700	C12orf71	-0.250504	-0.116885	-1.9892	0.0550263	0.921438	0.87697	14 x 19		12 p11	chromosome 12 open reading frame 71 [Source:HGNC Symbol;Acc:HGNC:34452]
1957	ENSG00000169193	CCDC126	-0.453047	-0.188139	-1.99057	0.0550364	0.921438	0.876978	1 x 16	I	7 p15	coiled-coil domain containing 126 [Source:HGNC Symbol;Acc:HGNC:22398]
1958	ENSG00000258938		0.289628	0.174783	1.99026	0.0550659	0.921438	0.877001	25 x 20		14 q13
1959	ENSG00000229618		-0.225198	-0.106521	-1.9948	0.0550714	0.921438	0.877005	23 x 32		7 p21
1960	ENSG00000115947	ORC4	0.325393	0.199315	1.99115	0.0550754	0.921438	0.877008	30 x 16		2 q23	origin recognition complex subunit 4 [Source:HGNC Symbol;Acc:HGNC:8490]
1961	ENSG00000140474	ULK3	0.439636	0.28202	1.98883	0.0551213	0.921438	0.877043	18 x 19		15 q24	unc-51 like kinase 3 [Source:HGNC Symbol;Acc:HGNC:19703]
1962	ENSG00000253497		-0.485378	-0.197588	-2.00692	0.0551767	0.921438	0.877086	35 x 7		2 p11	immunoglobulin kappa variable 1-13 (gene/pseudogene) [Source:HGNC Symbol;Acc:HGNC:5731]
1963	ENSG00000106052	TAX1BP1	-0.554987	-0.216135	-2.00146	0.0551823	0.921438	0.87709	30 x 15		7 p15	Tax1 binding protein 1 [Source:HGNC Symbol;Acc:HGNC:11575]
1964	ENSG00000254612		0.526382	0.349237	1.99102	0.055223	0.921438	0.877121	26 x 16		11 q24
1965	ENSG00000206881		-0.236349	-0.111128	-2.00224	0.0552746	0.921438	0.87716	12 x 15		6 p22	RNA, U6 small nuclear 190, pseudogene [Source:HGNC Symbol;Acc:HGNC:47153]
1966	ENSG00000122507	BBS9	-0.355025	-0.156251	-1.9873	0.055285	0.921438	0.877168	10 x 11		7 p14	Bardet-Biedl syndrome 9 [Source:HGNC Symbol;Acc:HGNC:30000]
1967	ENSG00000256982		0.349301	0.216075	1.99545	0.0553868	0.921438	0.877246	16 x 15		16 q24
1968	ENSG00000021461	CYP3A43	-0.338691	-0.150465	-1.9899	0.0554873	0.921438	0.877322	11 x 31		7 q22	cytochrome P450 family 3 subfamily A member 43 [Source:HGNC Symbol;Acc:HGNC:17450]
1969	ENSG00000122512	PMS2	-0.443757	-0.185326	-1.98574	0.0555334	0.921438	0.877357	5 x 11		7 p22	PMS1 homolog 2, mismatch repair system component [Source:HGNC Symbol;Acc:HGNC:9122]
1970	ENSG00000228486	LINC01125	0.563092	0.378831	2.00515	0.055568	0.921438	0.877383	6 x 26		2 q11	long intergenic non-protein coding RNA 1125 [Source:HGNC Symbol;Acc:HGNC:49272]
1971	ENSG00000165055	METTL2B	0.266066	0.158975	1.9895	0.0556137	0.921438	0.877417	17 x 29		7 q32	methyltransferase like 2B [Source:HGNC Symbol;Acc:HGNC:18272]
1972	ENSG00000113141	IK	-0.304564	-0.137937	-1.98359	0.0558289	0.921438	0.877579	14 x 36		5 q31	IK cytokine, down-regulator of HLA II [Source:HGNC Symbol;Acc:HGNC:5958]
1973	ENSG00000154620	TMSB4Y	0.249724	0.148176	2.00207	0.0558305	0.921438	0.87758	24 x 36		Y q11	thymosin beta 4, Y-linked [Source:HGNC Symbol;Acc:HGNC:11882]
1974	ENSG00000108924	HLF	-0.546206	-0.213931	-1.98326	0.055844	0.921438	0.87759	11 x 1		17 q22	HLF, PAR bZIP transcription factor [Source:HGNC Symbol;Acc:HGNC:4977]
1975	ENSG00000225498		-0.238669	-0.112079	-1.98226	0.0558463	0.921438	0.877592	1 x 26		7 q21
1976	ENSG00000176732	PFN4	0.388314	0.244047	1.98194	0.0558826	0.921438	0.877619	7 x 32		2 p23	profilin family member 4 [Source:HGNC Symbol;Acc:HGNC:31103]
1977	ENSG00000269365		-0.361572	-0.158533	-1.99256	0.0558906	0.921438	0.877625	13 x 28		18 q21
1978	ENSG00000224683		-0.357944	-0.157271	-1.99604	0.0559076	0.921438	0.877638	16 x 31		7 p21	ribosomal protein L36a pseudogene 29 [Source:HGNC Symbol;Acc:HGNC:36897]
1979	ENSG00000235105		0.301031	0.182533	2.01502	0.0559288	0.921438	0.877654	20 x 35		1 p33
1980	ENSG00000130202	NECTIN2	0.434011	0.277793	1.98181	0.0559373	0.921438	0.87766	21 x 14		19 q13	nectin cell adhesion molecule 2 [Source:HGNC Symbol;Acc:HGNC:9707]
1981	ENSG00000143368	SF3B4	-0.266513	-0.123274	-1.98488	0.0560485	0.921438	0.877743	35 x 32		1 q21	splicing factor 3b subunit 4 [Source:HGNC Symbol;Acc:HGNC:10771]
1982	ENSG00000231907		0.222261	0.130334	1.98342	0.0560547	0.921438	0.877747	24 x 35		22 q13	glyceraldehyde 3 phosphate dehydrogenase pseudogene 37 [Source:HGNC Symbol;Acc:HGNC:37791]
1983	ENSG00000099814	CEP170B	0.454615	0.293354	1.98246	0.05609	0.921438	0.877774	21 x 16		14 q32	centrosomal protein 170B [Source:HGNC Symbol;Acc:HGNC:20362]
1984	ENSG00000162694	EXTL2	-0.306771	-0.138765	-1.99792	0.0561955	0.921438	0.877852	30 x 20		1 p21	exostosin like glycosyltransferase 2 [Source:HGNC Symbol;Acc:HGNC:3516]
1985	ENSG00000122034	GTF3A	0.39366	0.247941	1.98408	0.0562147	0.921438	0.877866	37 x 34		13 q12	general transcription factor IIIA [Source:HGNC Symbol;Acc:HGNC:4662]
1986	ENSG00000177112	MRVI1-AS1	-0.541157	-0.212646	-1.98177	0.0562443	0.921438	0.877888	22 x 30		11 p15	MRVI1 antisense RNA 1 [Source:HGNC Symbol;Acc:HGNC:43434]
1987	ENSG00000257524		0.411191	0.260809	1.9826	0.0562447	0.921438	0.877888	15 x 23		9 q34
1988	ENSG00000196204	RNF216P1	-0.341843	-0.151592	-1.98031	0.0562701	0.921438	0.877907	17 x 12		7 p22	ring finger protein 216 pseudogene 1 [Source:HGNC Symbol;Acc:HGNC:33610]
[truncated: 30,051 more rows]

## Sheet: OV_gBRCA1.vs.OV_noBRCA
Sample Summary:
%DE:;;0.08
#genes with fdr < 0.2;;53
#genes with fdr < 0.1;;28
#genes with fdr < 0.05;;21
#genes with fdr < 0.01;;13
<FC> = 0
<t-score> = -0.03
<p-value> = 0
<fdr> = 0.92
Gene Statistics
Rank	ID	Symbol	logFC	WAD	T.Score	p.value	fdr	Fdr	Metagene	Spot	Chromosome	Description
1	ENSG00000255501	CARD18	-0.418434	-0.172378	-9.22314	0	8.51414e-08	0	25 x 30		11 q22	caspase recruitment domain family member 18 [Source:HGNC Symbol;Acc:HGNC:28861]
2	ENSG00000205409	OR52E6	-0.213187	-0.10222	-8.18471	2.89546e-12	1.04248e-05	4.25707e-08	24 x 33		11 p15	olfactory receptor family 52 subfamily E member 6 [Source:HGNC Symbol;Acc:HGNC:15215]
3	ENSG00000139352	ASCL1	-0.649749	-0.218224	-7.39447	3.57418e-10	8.5638e-05	3.50331e-06	3 x 35		12 q23	achaete-scute family bHLH transcription factor 1 [Source:HGNC Symbol;Acc:HGNC:738]
4	ENSG00000278531		-0.542554	-0.201356	-6.62827	5.3644e-09	8.5638e-05	3.34252e-05	28 x 23		10 q11
5	ENSG00000260289		-0.29693	-0.134193	-6.2309	6.18212e-09	9.05655e-05	3.63572e-05	24 x 33		16 p13
6	ENSG00000254101	LINC02055	-0.595662	-0.210658	-6.42032	9.26204e-09	0.000348911	4.53919e-05	26 x 32		8 q24	long intergenic non-protein coding RNA 2055 [Source:HGNC Symbol;Acc:HGNC:52895]
7	ENSG00000227683		-0.696297	-0.223195	-6.41789	2.18574e-08	0.000348911	9.10173e-05	30 x 23	B	10 q11
8	ENSG00000281566		-0.399484	-0.167062	-5.95827	3.29934e-08	0.000922419	0.000121272	26 x 31		X q21
9	ENSG00000224853		-0.548353	-0.202462	-6.31504	6.43627e-08	0.00150083	0.000210288	36 x 22	B	13 q22	long intergenic non-protein coding RNA 393 [Source:HGNC Symbol;Acc:HGNC:42721]
10	ENSG00000227674	LINC00355	-0.7396	-0.226539	-6.22673	1.38088e-07	0.00150083	0.00038877	26 x 31		13 q21	long intergenic non-protein coding RNA 355 [Source:HGNC Symbol;Acc:HGNC:27061]
11	ENSG00000184478	OR56A3	-0.539789	-0.200821	-6.09591	1.66442e-07	0.00495734	0.000444932	26 x 31		11 p15	olfactory receptor family 56 subfamily A member 3 [Source:HGNC Symbol;Acc:HGNC:14786]
12	ENSG00000267313	KC6	-1.26205	-0.169642	-6.49967	3.3503e-07	0.00853031	0.000820966	26 x 30		18 q12	keratoconus gene 6 [Source:NCBI gene;Acc:641516]
13	ENSG00000198681	MAGEA1	-0.885861	-0.228712	-5.47194	8.02745e-07	0.00853031	0.00173408	26 x 31		X q28	MAGE family member A1 [Source:HGNC Symbol;Acc:HGNC:6796]
14	ENSG00000238961	SNORA47	-0.725962	-0.225619	-5.76888	9.15222e-07	0.0120931	0.0019223	16 x 30		5 q13	small nucleolar RNA, H/ACA box 47 [Source:HGNC Symbol;Acc:HGNC:32640]
15	ENSG00000200204		-0.512975	-0.19537	-5.5044	1.32648e-06	0.0375767	0.00260035	17 x 31		16 p13	RNA, U1 small nuclear 22, pseudogene [Source:HGNC Symbol;Acc:HGNC:41963]
16	ENSG00000230501		-0.452337	-0.181299	-5.16318	5.24361e-06	0.0375767	0.00853509	31 x 22	B	10 q11	ankyrin repeat domain 30B pseudogene 3 [Source:HGNC Symbol;Acc:HGNC:27873]
17	ENSG00000253706		-1.09232	-0.207821	-5.38148	5.89803e-06	0.0375767	0.00933565	26 x 29		8 q21
18	ENSG00000274840		-0.386583	-0.163308	-5.06962	8.67794e-06	0.0375767	0.012296	26 x 31		3 p24
19	ENSG00000217236	SP9	-0.294117	-0.133194	-4.82106	8.81325e-06	0.0375767	0.0124243	22 x 29		2 q31	Sp9 transcription factor [Source:HGNC Symbol;Acc:HGNC:30690]
20	ENSG00000134365	CFHR4	-0.393417	-0.16531	-5.16916	9.25278e-06	0.0375767	0.0128323	26 x 32		1 q31	complement factor H related 4 [Source:HGNC Symbol;Acc:HGNC:16979]
21	ENSG00000226453		-1.06524	-0.212161	-5.37146	9.96616e-06	0.0375767	0.0134671	26 x 31		6 q14	long intergenic non-protein coding RNA 2542 [Source:HGNC Symbol;Acc:HGNC:53576]
22	ENSG00000167165	UGT1A6	-0.208663	-0.100361	-4.94316	1.02718e-05	0.0893957	0.0137292	34 x 19		2 q37	UDP glucuronosyltransferase family 1 member A6 [Source:HGNC Symbol;Acc:HGNC:12538]
23	ENSG00000275512		-0.33181	-0.146148	-5.21718	1.4755e-05	0.0893957	0.0184826	15 x 13		18 q12
24	ENSG00000124785	NRN1	-1.0871	-0.208696	-5.10559	1.80931e-05	0.0893957	0.0216513	15 x 6		6 p25	neuritin 1 [Source:HGNC Symbol;Acc:HGNC:17972]
25	ENSG00000173809	TDRD12	-0.766618	-0.228	-4.66696	2.20587e-05	0.0893957	0.0250661	27 x 24		19 q13	tudor domain containing 12 [Source:HGNC Symbol;Acc:HGNC:25044]
26	ENSG00000212464	SNORA12	-0.707597	-0.224186	-4.90663	2.4597e-05	0.0893957	0.0270768	16 x 30		10 q24	small nucleolar RNA, H/ACA box 12 [Source:HGNC Symbol;Acc:HGNC:32600]
27	ENSG00000226674	TEX41	-0.856664	-0.229403	-4.89501	2.83503e-05	0.0893957	0.0298299	25 x 29		2 q22	testis expressed 41 (non-protein coding) [Source:HGNC Symbol;Acc:HGNC:48667]
28	ENSG00000214429		-0.348916	-0.15172	-4.84403	2.94785e-05	0.0893957	0.0306104	26 x 32		2 p12	cytochrome c, somatic pseudogene 6 [Source:HGNC Symbol;Acc:HGNC:24421]
29	ENSG00000113163	COL4A3BP	-0.59667	-0.210817	-5.20792	3.15528e-05	0.101591	0.0319935	1 x 15	I	5 q13	collagen type IV alpha 3 binding protein [Source:HGNC Symbol;Acc:HGNC:2205]
30	ENSG00000231776		-0.723213	-0.225419	-4.9114	3.50688e-05	0.101591	0.0343531	26 x 31		6 q14	long intergenic non-protein coding RNA 1611 [Source:HGNC Symbol;Acc:HGNC:51791]
31	ENSG00000249042		-0.738201	-0.22645	-5.06709	4.34264e-05	0.101591	0.0393676	5 x 37		5 q14
32	ENSG00000156150	ALX3	-0.794323	-0.229	-4.74725	4.66312e-05	0.101591	0.0410976	29 x 25		1 p13	ALX homeobox 3 [Source:HGNC Symbol;Acc:HGNC:449]
33	ENSG00000152910	CNTNAP4	-0.40955	-0.169915	-4.52338	4.66555e-05	0.101591	0.0411103	25 x 30		16 q23	contactin associated protein like 4 [Source:HGNC Symbol;Acc:HGNC:18747]
34	ENSG00000225087		-0.618443	-0.214079	-4.72595	5.03356e-05	0.101591	0.0429811	26 x 31		1 p31
35	ENSG00000204410	MSH5	0.511609	0.367303	4.66112	5.75591e-05	0.101591	0.046336	8 x 26	J	6 p21	mutS homolog 5 [Source:HGNC Symbol;Acc:HGNC:7328]
36	ENSG00000056291	NPFFR2	-0.543563	-0.20155	-4.35035	5.94092e-05	0.101591	0.0471343	1 x 18		4 q13	neuropeptide FF receptor 2 [Source:HGNC Symbol;Acc:HGNC:4525]
37	ENSG00000154143	PANX3	-0.445372	-0.179529	-4.49234	6.10283e-05	0.101591	0.0478143	26 x 31		11 q24	pannexin 3 [Source:HGNC Symbol;Acc:HGNC:20573]
38	ENSG00000255298	OR8G5	-0.419028	-0.172541	-4.45308	7.3285e-05	0.101591	0.0524585	26 x 31		11 q24	olfactory receptor family 8 subfamily G member 5 [Source:HGNC Symbol;Acc:HGNC:19622]
39	ENSG00000169570	DTWD2	-0.534518	-0.199787	-4.77818	7.87577e-05	0.101591	0.0542828	1 x 15	I	5 q23	DTW domain containing 2 [Source:HGNC Symbol;Acc:HGNC:19334]
40	ENSG00000262484	CCER2	0.68995	0.535822	4.74738	8.07699e-05	0.101591	0.0549199	8 x 27	J	19 q13	coiled-coil glutamate rich protein 2 [Source:HGNC Symbol;Acc:HGNC:44662]
41	ENSG00000169906	S100G	0.403197	0.275089	4.84647	8.10193e-05	0.101591	0.0549977	12 x 33		X p22	S100 calcium binding protein G [Source:HGNC Symbol;Acc:HGNC:1436]
42	ENSG00000267327		-1.31878	-0.152654	-4.88076	8.18488e-05	0.101591	0.0552545	26 x 30		18 q21
43	ENSG00000260019		-0.374014	-0.159545	-4.29472	8.24673e-05	0.101591	0.0554442	24 x 32		17 q11	long intergenic non-protein coding RNA 1992 [Source:HGNC Symbol;Acc:HGNC:52824]
44	ENSG00000248268		-0.644095	-0.217523	-4.59704	8.42466e-05	0.101591	0.0559812	26 x 31		5 q22
45	ENSG00000153266	FEZF2	-0.420957	-0.173068	-4.26057	8.6831e-05	0.104212	0.0567394	15 x 10		3 p14	FEZ family zinc finger 2 [Source:HGNC Symbol;Acc:HGNC:13506]
46	ENSG00000276566		-0.935481	-0.226252	-4.47133	9.12048e-05	0.104212	0.0580066	40 x 1	E	2 p11	immunoglobulin kappa variable 1D-13 [Source:HGNC Symbol;Acc:HGNC:5747]
47	ENSG00000129455	KLK8	0.824927	0.677277	4.5671	0.000100907	0.104212	0.0605895	40 x 12	D	19 q13	kallikrein related peptidase 8 [Source:HGNC Symbol;Acc:HGNC:6369]
48	ENSG00000131096	PYY	-0.67625	-0.221229	-4.38147	0.00010188	0.104212	0.0608329	4 x 36		17 q21	peptide YY [Source:HGNC Symbol;Acc:HGNC:9748]
49	ENSG00000167117		0.392281	0.266233	4.73854	0.000111241	0.104212	0.0630411	16 x 34		17 q21	long intergenic non-protein coding RNA 483 [Source:HGNC Symbol;Acc:HGNC:26080]
50	ENSG00000136099	PCDH8	-0.519452	-0.19673	-4.1985	0.000111569	0.104212	0.0631143	31 x 25	B	13 q14	protocadherin 8 [Source:HGNC Symbol;Acc:HGNC:8660]
51	ENSG00000213199	ASIC3	1.03919	0.926439	4.68736	0.00011326	0.104212	0.0634882	8 x 27	J	7 q36	acid sensing ion channel subunit 3 [Source:HGNC Symbol;Acc:HGNC:101]
52	ENSG00000259515		0.524616	0.378886	4.67341	0.000115166	0.104212	0.0639015	11 x 23		14 q32
53	ENSG00000185527	PDE6G	-0.97713	-0.222936	-4.48645	0.000115183	0.142239	0.0639051	35 x 5		17 q25	phosphodiesterase 6G [Source:HGNC Symbol;Acc:HGNC:8789]
54	ENSG00000119547	ONECUT2	-0.931086	-0.226535	-4.43168	0.00012002	0.221546	0.0653558	38 x 25	C	18 q21	one cut homeobox 2 [Source:HGNC Symbol;Acc:HGNC:8139]
55	ENSG00000197558	SSPO	1.19005	1.12001	4.6512	0.000136089	0.221546	0.0712902	6 x 26		7 q36	SCO-spondin [Source:HGNC Symbol;Acc:HGNC:21998]
56	ENSG00000266602		-0.858305	-0.229379	-4.43143	0.000142905	0.221546	0.0736733	26 x 31		18 p11
57	ENSG00000039319	ZFYVE16	-0.42769	-0.174889	-4.55313	0.000152032	0.221546	0.0767488	1 x 16	I	5 q14	zinc finger FYVE-type containing 16 [Source:HGNC Symbol;Acc:HGNC:20756]
58	ENSG00000253451		-0.24323	-0.114221	-4.34564	0.000152839	0.221546	0.0770145	34 x 7		22 q11	immunoglobulin lambda variable 2-28 (pseudogene) [Source:HGNC Symbol;Acc:HGNC:5891]
59	ENSG00000273768		-0.705624	-0.224019	-4.27501	0.000172743	0.221546	0.0832742	16 x 31		1 q21	U1 spliceosomal RNA [Source:RFAM;Acc:RF00003]
60	ENSG00000232727		-0.3637	-0.156379	-4.34104	0.000173207	0.221546	0.0834135	25 x 32		7 q11	tyrosine 3-monooxygenase/tryptophan 5-monooxygenase activation protein epsilon pseudogene 1 [Source:HGNC Symbol;Acc:HGNC:49442]
61	ENSG00000237423		-0.295355	-0.133634	-4.28177	0.000212578	0.221546	0.0943031	5 x 37		20 q13	long intergenic non-protein coding RNA 1522 [Source:HGNC Symbol;Acc:HGNC:51224]
62	ENSG00000247572	CKMT2-AS1	-0.467919	-0.185146	-4.4074	0.000220019	0.221546	0.0961714	7 x 32		5 q14	CKMT2 antisense RNA 1 [Source:HGNC Symbol;Acc:HGNC:48997]
63	ENSG00000104327	CALB1	-0.930515	-0.226571	-4.1362	0.00022653	0.221546	0.0977614	8 x 19		8 q21	calbindin 1 [Source:HGNC Symbol;Acc:HGNC:1434]
64	ENSG00000196620	UGT2B15	-0.422532	-0.173497	-4.07005	0.000228108	0.221546	0.0981408	1 x 18		4 q13	UDP glucuronosyltransferase family 2 member B15 [Source:HGNC Symbol;Acc:HGNC:12546]
65	ENSG00000258545	RHOXF1-AS1	-0.749044	-0.227104	-4.20645	0.000229344	0.221546	0.0984363	22 x 25		X q24	RHOXF1 antisense RNA 1 [Source:HGNC Symbol;Acc:HGNC:51582]
66	ENSG00000198865	CCDC152	-0.710365	-0.224417	-4.26805	0.000255915	0.221546	0.104463	23 x 29		5 p12	coiled-coil domain containing 152 [Source:HGNC Symbol;Acc:HGNC:34438]
67	ENSG00000261040		-0.992313	-0.221443	-4.28154	0.00025666	0.221546	0.104624	38 x 22	C	17 q23	WAP four-disulfide core domain 21, pseudogene [Source:HGNC Symbol;Acc:HGNC:50357]
68	ENSG00000168703	WFDC12	-0.443443	-0.179032	-4.09143	0.000260564	0.221546	0.105458	36 x 14		20 q13	WAP four-disulfide core domain 12 [Source:HGNC Symbol;Acc:HGNC:16115]
69	ENSG00000164902	PHAX	-0.38673	-0.163351	-4.3581	0.000263765	0.221546	0.106133	1 x 14	I	5 q23	phosphorylated adaptor for RNA export [Source:HGNC Symbol;Acc:HGNC:10241]
70	ENSG00000225096		-0.735339	-0.226265	-4.29866	0.000280459	0.221546	0.109529	25 x 26		6 p11
71	ENSG00000254859		0.697088	0.543002	4.36203	0.000281325	0.221546	0.1097	25 x 12		8 q24
72	ENSG00000115841	RMDN2	-0.425928	-0.174415	-4.27812	0.00028246	0.221546	0.109923	13 x 10		2 p22	regulator of microtubule dynamics 2 [Source:HGNC Symbol;Acc:HGNC:26567]
73	ENSG00000273196		0.335508	0.221436	4.29035	0.000285777	0.221546	0.110569	14 x 20		2 p11
74	ENSG00000258053		-0.861713	-0.229323	-4.17207	0.000290682	0.221546	0.111512	26 x 30		12 q21
75	ENSG00000142149	HUNK	0.737352	0.584133	4.20326	0.0002948	0.221546	0.112291	6 x 6	H	21 q22	hormonally up-regulated Neu-associated kinase [Source:HGNC Symbol;Acc:HGNC:13326]
76	ENSG00000212402	SNORA74B	-0.501905	-0.192982	-4.02173	0.000302726	0.221546	0.11376	15 x 30		5 q35	small nucleolar RNA, H/ACA box 74B [Source:HGNC Symbol;Acc:HGNC:32660]
77	ENSG00000259129	LINC00648	-1.67062	0	-4.24546	0.000304696	0.221546	0.114119	26 x 30		14 q21	long intergenic non-protein coding RNA 648 [Source:HGNC Symbol;Acc:HGNC:44302]
78	ENSG00000237886		0.751202	0.598528	4.28379	0.00031021	0.221546	0.115111	7 x 29		9 q34	NOTCH1 associated lncRNA in T-cell acute lymphoblastic leukemia 1 [Source:HGNC Symbol;Acc:HGNC:51192]
79	ENSG00000227115	LINC01630	-0.314082	-0.140172	-4.16634	0.000310739	0.221546	0.115205	20 x 29		18 q21	long intergenic non-protein coding RNA 1630 [Source:HGNC Symbol;Acc:HGNC:52295]
80	ENSG00000249352		-0.538789	-0.200626	-4.25501	0.000327806	0.221546	0.118158	22 x 25		5 q13	long intergenic non-protein coding RNA 2198 [Source:HGNC Symbol;Acc:HGNC:53064]
81	ENSG00000215788	TNFRSF25	0.718702	0.564949	4.24089	0.000330908	0.221546	0.118677	8 x 26	J	1 p36	TNF receptor superfamily member 25 [Source:HGNC Symbol;Acc:HGNC:11910]
82	ENSG00000126091	ST3GAL3	-0.350315	-0.152167	-4.16912	0.00033654	0.221546	0.119607	18 x 11		1 p34	ST3 beta-galactoside alpha-2,3-sialyltransferase 3 [Source:HGNC Symbol;Acc:HGNC:10866]
83	ENSG00000151292	CSNK1G3	-0.487784	-0.189819	-4.2801	0.000338514	0.224001	0.119928	1 x 16	I	5 q23	casein kinase 1 gamma 3 [Source:HGNC Symbol;Acc:HGNC:2456]
84	ENSG00000166965	RCCD1	0.638363	0.484924	4.27604	0.000349461	0.224001	0.1217	39 x 30	A	15 q26	RCC1 domain containing 1 [Source:HGNC Symbol;Acc:HGNC:30457]
85	ENSG00000206634	SNORA22	-0.406245	-0.168986	-3.92189	0.000364247	0.224001	0.123998	16 x 30		7 q11	small nucleolar RNA, H/ACA box 22 [Source:HGNC Symbol;Acc:HGNC:32612]
86	ENSG00000260922		-0.401086	-0.167521	-4.05231	0.000376754	0.224001	0.125864	26 x 24		16 q23
87	ENSG00000255422		0.47818	0.338043	4.13466	0.000389069	0.224001	0.127634	30 x 7		11 q23
88	ENSG00000257270		0.788034	0.637423	4.1952	0.000394548	0.224001	0.128401	6 x 25		14 q32
89	ENSG00000222489	SNORA79B	-0.437342	-0.177447	-3.88492	0.000411806	0.224001	0.130739	16 x 30		14 q11	small nucleolar RNA, H/ACA box 79B [Source:HGNC Symbol;Acc:HGNC:52222]
90	ENSG00000164904	ALDH7A1	-0.567361	-0.205932	-4.18858	0.000412283	0.224001	0.130802	22 x 39		5 q23	aldehyde dehydrogenase 7 family member A1 [Source:HGNC Symbol;Acc:HGNC:877]
91	ENSG00000168283	BMI1	-0.555035	-0.203709	-4.14043	0.000422364	0.224001	0.132114	1 x 17		10 p12	BMI1 proto-oncogene, polycomb ring finger [Source:HGNC Symbol;Acc:HGNC:1066]
92	ENSG00000152117	LOC150776	0.426075	0.293905	4.09402	0.000433912	0.224001	0.133572	8 x 26	J	2 q21
93	ENSG00000180229	HERC2P3	-0.694787	-0.223056	-3.95693	0.000436284	0.224001	0.133866	6 x 23		15 q11	hect domain and RLD 2 pseudogene 3 [Source:HGNC Symbol;Acc:HGNC:4871]
94	ENSG00000235191	NUCB1-AS1	0.204776	0.126345	3.94213	0.000446213	0.224001	0.135076	14 x 19		19 q13	NUCB1 antisense RNA 1 [Source:HGNC Symbol;Acc:HGNC:40419]
95	ENSG00000185002	RFX6	-0.256041	-0.119158	-3.93948	0.000446613	0.224001	0.135124	23 x 29		6 q22	regulatory factor X6 [Source:HGNC Symbol;Acc:HGNC:21478]
96	ENSG00000197888	UGT2B17	-0.986631	-0.22202	-3.98124	0.000449586	0.224001	0.135479	1 x 18		4 q13	UDP glucuronosyltransferase family 2 member B17 [Source:HGNC Symbol;Acc:HGNC:12547]
97	ENSG00000129757	CDKN1C	-1.00167	-0.220448	-4.12239	0.000462324	0.224001	0.13697	25 x 26		11 p15	cyclin dependent kinase inhibitor 1C [Source:HGNC Symbol;Acc:HGNC:1786]
98	ENSG00000189045	ANKDD1B	-0.56603	-0.205697	-4.04954	0.000465803	0.224001	0.137369	3 x 28		5 q13	ankyrin repeat and death domain containing 1B [Source:HGNC Symbol;Acc:HGNC:32525]
99	ENSG00000234948	LINC01524	-0.329826	-0.14549	-3.87778	0.00046862	0.224001	0.137689	24 x 31		20 q13	long intergenic non-protein coding RNA 1524 [Source:HGNC Symbol;Acc:HGNC:51228]
100	ENSG00000179935		-0.531315	-0.199149	-3.94153	0.00049649	0.224001	0.140733	26 x 23		20 p11	long intergenic non-protein coding RNA 652 [Source:HGNC Symbol;Acc:HGNC:25003]
101	ENSG00000100075	SLC25A1	0.628485	0.475378	4.10935	0.000497534	0.224001	0.140843	40 x 36		22 q11	solute carrier family 25 member 1 [Source:HGNC Symbol;Acc:HGNC:10979]
102	ENSG00000141527	CARD14	0.900013	0.761158	4.11596	0.000498895	0.224001	0.140986	18 x 19		17 q25	caspase recruitment domain family member 14 [Source:HGNC Symbol;Acc:HGNC:16446]
103	ENSG00000117016	RIMS3	-0.918899	-0.227254	-4.08949	0.000500386	0.224001	0.141142	28 x 24		1 p34	regulating synaptic membrane exocytosis 3 [Source:HGNC Symbol;Acc:HGNC:21292]
104	ENSG00000253658	LINC01592	-0.314551	-0.140333	-3.90829	0.000508638	0.224001	0.141994	24 x 33		8 q13	long intergenic non-protein coding RNA 1592 [Source:HGNC Symbol;Acc:HGNC:51557]
105	ENSG00000159409	CELF3	-0.321631	-0.142742	-3.69216	0.000508925	0.224001	0.142023	1 x 34		1 q21	CUGBP Elav-like family member 3 [Source:HGNC Symbol;Acc:HGNC:11967]
106	ENSG00000101343	CRNKL1	-0.248845	-0.116398	-3.89751	0.000520722	0.224001	0.14321	1 x 17		20 p11	crooked neck pre-mRNA splicing factor 1 [Source:HGNC Symbol;Acc:HGNC:15762]
107	ENSG00000207088	SNORA7B	-0.603872	-0.21193	-3.93488	0.000524429	0.224001	0.143577	16 x 30		3 q21	small nucleolar RNA, H/ACA box 7B [Source:HGNC Symbol;Acc:HGNC:32593]
108	ENSG00000167702	KIFC2	0.726619	0.573065	4.02406	0.000528959	0.276767	0.144019	8 x 27	J	8 q24	kinesin family member C2 [Source:HGNC Symbol;Acc:HGNC:29530]
109	ENSG00000212232	SNORD17	-0.782199	-0.228625	-3.87352	0.000557765	0.276767	0.147677	28 x 36		20 p11	small nucleolar RNA, C/D box 17 [Source:HGNC Symbol;Acc:HGNC:32713]
110	ENSG00000248874	C5orf17	-0.609461	-0.212771	-3.76153	0.000582148	0.276767	0.15062	28 x 10		5 p14	chromosome 5 open reading frame 17 [Source:HGNC Symbol;Acc:HGNC:26630]
111	ENSG00000116983	HPCAL4	-0.633781	-0.216191	-3.88369	0.000587966	0.276767	0.151302	26 x 26		1 p34	hippocalcin like 4 [Source:HGNC Symbol;Acc:HGNC:18212]
112	ENSG00000227039	ITGB2-AS1	0.767993	0.616149	3.94616	0.000601436	0.276767	0.152854	39 x 8	D	21 q22	ITGB2 antisense RNA 1 [Source:HGNC Symbol;Acc:HGNC:44304]
113	ENSG00000146574	CCZ1B	-0.536418	-0.200161	-4.01664	0.000606268	0.276767	0.153402	31 x 18		7 p22	CCZ1 homolog B, vacuolar protein trafficking and biogenesis associated [Source:HGNC Symbol;Acc:HGNC:21717]
114	ENSG00000244151		0.501396	0.358286	3.97376	0.000609202	0.276767	0.153732	10 x 26		7 q36
115	ENSG00000260677		-0.220678	-0.105268	-3.93342	0.000615428	0.276767	0.154426	19 x 32		9 q22
116	ENSG00000233985		-0.30516	-0.137086	-3.81654	0.00061769	0.276767	0.154677	24 x 33		1 q24	long intergenic non-protein coding RNA 1681 [Source:HGNC Symbol;Acc:HGNC:52468]
117	ENSG00000006837	CDKL3	-0.42666	-0.174612	-4.00241	0.0006202	0.276767	0.154953	7 x 32		5 q31	cyclin dependent kinase like 3 [Source:HGNC Symbol;Acc:HGNC:15483]
118	ENSG00000151304	SRFBP1	-0.376018	-0.160151	-3.98328	0.000630176	0.276767	0.15604	1 x 13	I	5 q23	serum response factor binding protein 1 [Source:HGNC Symbol;Acc:HGNC:26333]
119	ENSG00000106346	USP42	-0.463863	-0.18416	-3.98827	0.000660854	0.276767	0.159265	26 x 20		7 p22	ubiquitin specific peptidase 42 [Source:HGNC Symbol;Acc:HGNC:20068]
120	ENSG00000207175		-0.468443	-0.185273	-3.66099	0.000683019	0.276767	0.16149	30 x 36		X q24	RNA, U1 small nuclear 67, pseudogene [Source:HGNC Symbol;Acc:HGNC:48409]
121	ENSG00000131400	NAPSA	0.569643	0.419843	3.94166	0.000684992	0.276767	0.161684	7 x 25	J	19 q13	napsin A aspartic peptidase [Source:HGNC Symbol;Acc:HGNC:13395]
122	ENSG00000243959		0.352912	0.234943	3.96454	0.000691413	0.276767	0.162311	15 x 19		5 q35	RNA, 7SL, cytoplasmic 684, pseudogene [Source:HGNC Symbol;Acc:HGNC:46700]
123	ENSG00000253593	LOC101927822	-0.241839	-0.113678	-3.83258	0.000692805	0.276767	0.162446	22 x 36		8 q24
124	ENSG00000250874		-0.799616	-0.229134	-3.92247	0.000700439	0.276767	0.163181	26 x 31		5 q14
125	ENSG00000270722		-0.5145	-0.195693	-3.68221	0.000701446	0.276767	0.163277	28 x 36		1 q21	U1 spliceosomal RNA [Source:RFAM;Acc:RF00003]
126	ENSG00000008196	TFAP2B	-0.265233	-0.122634	-3.65061	0.000717074	0.276767	0.164749	7 x 37		6 p12	transcription factor AP-2 beta [Source:HGNC Symbol;Acc:HGNC:11743]
127	ENSG00000279130		-0.362106	-0.155884	-3.86758	0.000721793	0.276767	0.165186	18 x 29		5 q31
128	ENSG00000186526	CYP4F8	-0.393466	-0.165324	-3.79127	0.000724746	0.276767	0.165458	8 x 36		19 p13	cytochrome P450 family 4 subfamily F member 8 [Source:HGNC Symbol;Acc:HGNC:2648]
129	ENSG00000148053	NTRK2	-0.777236	-0.228443	-3.83526	0.000730212	0.276767	0.165958	13 x 1		9 q21	neurotrophic receptor tyrosine kinase 2 [Source:HGNC Symbol;Acc:HGNC:8032]
130	ENSG00000169957	ZNF768	0.289632	0.186786	3.84461	0.000736027	0.279857	0.166484	20 x 17		16 p11	zinc finger protein 768 [Source:HGNC Symbol;Acc:HGNC:26273]
131	ENSG00000229618		-0.299338	-0.135044	-3.79825	0.000777635	0.279857	0.170173	23 x 32		7 p21
132	ENSG00000200344		0.23995	0.150823	3.8278	0.000782522	0.279857	0.17059	10 x 16		1 p36	Y RNA [Source:RFAM;Acc:RF00019]
133	ENSG00000233215	LINC01687	-0.234603	-0.110835	-3.66334	0.000797166	0.279857	0.171823	24 x 32		21 q21	long intergenic non-protein coding RNA 1687 [Source:HGNC Symbol;Acc:HGNC:52474]
134	ENSG00000234352	LOC349160	-1.04289	-0.215377	-3.82524	0.000799993	0.279857	0.172058	26 x 30		7 q33
135	ENSG00000215644	GCGR	-0.318546	-0.141696	-3.52345	0.000810808	0.279857	0.172946	29 x 30		17 q25	glucagon receptor [Source:HGNC Symbol;Acc:HGNC:4192]
136	ENSG00000227329		0.261083	0.165922	3.90851	0.000818043	0.279857	0.173532	8 x 16		X p11
137	ENSG00000129646	QRICH2	0.493747	0.351577	3.828	0.000823705	0.279857	0.173987	11 x 26		17 q25	glutamine rich 2 [Source:HGNC Symbol;Acc:HGNC:25326]
138	ENSG00000204934	ATP6V0E2-AS1	0.592391	0.441043	3.87349	0.00083336	0.279857	0.174753	18 x 25		7 q36	ATP6V0E2 antisense RNA 1 [Source:HGNC Symbol;Acc:HGNC:44180]
139	ENSG00000237133		0.294784	0.190608	3.82095	0.000872595	0.279857	0.177754	15 x 14		2 p22
140	ENSG00000201098	RNY1	-0.355482	-0.153807	-3.74305	0.00087443	0.279857	0.177891	28 x 36		7 q36	RNA, Ro-associated Y1 [Source:HGNC Symbol;Acc:HGNC:10242]
141	ENSG00000177182	CLVS1	-0.928969	-0.226667	-3.81983	0.000911396	0.279857	0.180559	26 x 29		8 q12	clavesin 1 [Source:HGNC Symbol;Acc:HGNC:23139]
142	ENSG00000178828	RNF186	-0.261354	-0.121174	-3.61701	0.00091796	0.279857	0.181018	15 x 8		1 p36	ring finger protein 186 [Source:HGNC Symbol;Acc:HGNC:25978]
143	ENSG00000230561	CCDC192	-0.489027	-0.190102	-3.84115	0.000921195	0.279857	0.181243	24 x 30		5 q23	coiled-coil domain containing 192 [Source:HGNC Symbol;Acc:HGNC:49566]
144	ENSG00000100246	DNAL4	-0.457728	-0.182648	-3.79464	0.000936168	0.279857	0.18227	32 x 34		22 q13	dynein axonemal light chain 4 [Source:HGNC Symbol;Acc:HGNC:2955]
145	ENSG00000259891		0.615377	0.46281	3.81442	0.000944435	0.279857	0.182828	9 x 27		8 q24
146	ENSG00000177879	AP3S1	-0.42015	-0.172848	-3.81811	0.000965156	0.279857	0.184199	22 x 39		5 q22	adaptor related protein complex 3 sigma 1 subunit [Source:HGNC Symbol;Acc:HGNC:2013]
147	ENSG00000223458	LMO7DN-IT1	-0.266491	-0.123105	-3.74175	0.000973816	0.279857	0.184761	22 x 30		13 q22	LMO7DN intronic transcript 1 [Source:HGNC Symbol;Acc:HGNC:49790]
148	ENSG00000196781	TLE1	0.398967	0.271648	3.75346	0.000998813	0.279857	0.186346	40 x 21	C	9 q21	transducin like enhancer of split 1 [Source:HGNC Symbol;Acc:HGNC:11837]
149	ENSG00000166262	FAM227B	-0.428697	-0.175159	-3.74626	0.0010024	0.279857	0.186569	6 x 33		15 q21	family with sequence similarity 227 member B [Source:HGNC Symbol;Acc:HGNC:26543]
150	ENSG00000113391	FAM172A	-0.50439	-0.193525	-3.81781	0.00101655	0.279857	0.187438	1 x 17		5 q15	family with sequence similarity 172 member A [Source:HGNC Symbol;Acc:HGNC:25365]
151	ENSG00000154832	CXXC1	-0.374257	-0.159618	-3.76824	0.00102486	0.279857	0.187942	19 x 17		18 q21	CXXC finger protein 1 [Source:HGNC Symbol;Acc:HGNC:24343]
152	ENSG00000253865		0.402827	0.274788	3.80085	0.00102532	0.279857	0.187969	17 x 32		5 q32
153	ENSG00000257842		-0.825517	-0.229521	-3.71538	0.00103058	0.279857	0.188285	26 x 31		14 q12	NOVA1 antisense RNA 1 (head to head) [Source:HGNC Symbol;Acc:HGNC:19827]
154	ENSG00000259570		-0.291633	-0.132307	-3.62418	0.00106105	0.279857	0.190071	23 x 22		15 q25
155	ENSG00000125462	C1orf61	-0.320873	-0.142486	-3.68053	0.00106238	0.279857	0.190147	36 x 21	C	1 q22	chromosome 1 open reading frame 61 [Source:HGNC Symbol;Acc:HGNC:30780]
156	ENSG00000219545	UMAD1	-0.578091	-0.207786	-3.82052	0.00106862	0.279857	0.190504	1 x 15	I	7 p21	UBAP1-MVB12-associated (UMA) domain containing 1 [Source:HGNC Symbol;Acc:HGNC:48955]
157	ENSG00000171885	AQP4	-0.588604	-0.209529	-3.63013	0.00108577	0.279857	0.191469	36 x 20	C	18 q11	aquaporin 4 [Source:HGNC Symbol;Acc:HGNC:637]
158	ENSG00000213931	HBE1	-0.462671	-0.183868	-3.66302	0.00108843	0.279857	0.191617	24 x 30		11 p15	hemoglobin subunit epsilon 1 [Source:HGNC Symbol;Acc:HGNC:4830]
159	ENSG00000279565		-0.208697	-0.100375	-3.49603	0.00110261	0.279857	0.192398	24 x 31		6 q15
160	ENSG00000253709		-0.222595	-0.106042	-3.5397	0.00110783	0.279857	0.192681	34 x 7		14 q32	immunoglobulin heavy variable 1-14 (pseudogene) [Source:HGNC Symbol;Acc:HGNC:5547]
161	ENSG00000179046	TRIML2	-0.209221	-0.100591	-3.61404	0.00111522	0.279857	0.19308	34 x 20		4 q35	tripartite motif family like 2 [Source:HGNC Symbol;Acc:HGNC:26378]
162	ENSG00000179403	VWA1	0.533325	0.386703	3.70553	0.00111985	0.279857	0.193328	21 x 14		1 p36	von Willebrand factor A domain containing 1 [Source:HGNC Symbol;Acc:HGNC:30910]
163	ENSG00000169224	GCSAML	-0.621727	-0.214545	-3.6496	0.00112102	0.279857	0.19339	1 x 19		1 q44	germinal center associated signaling and motility like [Source:HGNC Symbol;Acc:HGNC:29583]
164	ENSG00000277692		-0.358081	-0.154625	-3.6618	0.00116079	0.279857	0.195459	13 x 28		20 q11
165	ENSG00000105889	STEAP1B	-0.564858	-0.205488	-3.63512	0.00116397	0.279857	0.19562	34 x 23	B	7 p15	STEAP family member 1B [Source:HGNC Symbol;Acc:HGNC:41907]
166	ENSG00000181355		-0.606427	-0.212317	-3.68023	0.00117331	0.279857	0.19609	28 x 29		6 p24	orofacial cleft 1 candidate 1 [Source:HGNC Symbol;Acc:HGNC:21017]
167	ENSG00000214563		-0.226658	-0.107675	-3.67248	0.00119618	0.279857	0.197219	13 x 12		6 p11	glyceraldehyde-3-phosphate dehydrogenase pseudogene 15 [Source:HGNC Symbol;Acc:HGNC:13950]
168	ENSG00000119973	PRLHR	-0.256137	-0.119195	-3.4915	0.00121584	0.279857	0.198165	19 x 32		10 q26	prolactin releasing hormone receptor [Source:HGNC Symbol;Acc:HGNC:4464]
169	ENSG00000165966	PDZRN4	-0.589498	-0.209674	-3.62471	0.00121995	0.279857	0.19836	5 x 1		12 q12	PDZ domain containing ring finger 4 [Source:HGNC Symbol;Acc:HGNC:30552]
170	ENSG00000067601		-0.248684	-0.116336	-3.59392	0.00122843	0.279857	0.198759	18 x 36		7 q11	PMS1 homolog 2, mismatch repair system component pseudogene 4 [Source:HGNC Symbol;Acc:HGNC:9129]
171	ENSG00000167755	KLK6	1.18371	1.11156	3.68354	0.00123682	0.279857	0.199151	40 x 13	D	19 q13	kallikrein related peptidase 6 [Source:HGNC Symbol;Acc:HGNC:6367]
172	ENSG00000231291		-0.171173	-0.0844407	-3.52481	0.00123974	0.279857	0.199287	13 x 9		5 p15
173	ENSG00000249125		-0.308713	-0.138321	-3.41901	0.00124072	0.279857	0.199332	23 x 31		4 q28
174	ENSG00000100341	PNPLA5	-0.603716	-0.211907	-3.67728	0.0012441	0.279857	0.199488	24 x 22		22 q13	patatin like phospholipase domain containing 5 [Source:HGNC Symbol;Acc:HGNC:24888]
175	ENSG00000131943	C19orf12	-0.32141	-0.142668	-3.4832	0.00125158	0.279857	0.199831	34 x 19		19 q12	chromosome 19 open reading frame 12 [Source:HGNC Symbol;Acc:HGNC:25443]
176	ENSG00000158985	CDC42SE2	-0.468364	-0.185254	-3.73898	0.00125475	0.279857	0.199975	30 x 10		5 q31	CDC42 small effector 2 [Source:HGNC Symbol;Acc:HGNC:18547]
177	ENSG00000236107	LOC101929680	-0.336999	-0.147859	-3.55428	0.00125673	0.279857	0.200065	19 x 29		2 q24
178	ENSG00000151962	RBM46	-0.333335	-0.146653	-3.50303	0.00126706	0.279857	0.200531	21 x 27		4 q32	RNA binding motif protein 46 [Source:HGNC Symbol;Acc:HGNC:28401]
179	ENSG00000144908	ALDH1L1	-1.11002	-0.204726	-3.69962	0.00126796	0.279857	0.200572	24 x 26		3 q21	aldehyde dehydrogenase 1 family member L1 [Source:HGNC Symbol;Acc:HGNC:3978]
180	ENSG00000111404	RERGL	-0.453903	-0.181693	-3.54433	0.00126821	0.279857	0.200583	14 x 1		12 p12	RERG like [Source:HGNC Symbol;Acc:HGNC:26213]
181	ENSG00000250590	LINC02492	-0.363765	-0.156399	-3.49098	0.00127239	0.279857	0.20077	34 x 19		4 q35	long intergenic non-protein coding RNA 2492 [Source:HGNC Symbol;Acc:HGNC:53476]
182	ENSG00000267413		-0.489134	-0.190126	-3.58937	0.00128117	0.279857	0.201159	26 x 30		18 q12	long intergenic non-protein coding RNA 1901 [Source:HGNC Symbol;Acc:HGNC:52720]
183	ENSG00000087338	GMCL1	-0.229612	-0.108855	-3.58482	0.00128917	0.279857	0.201511	29 x 18		2 p13	germ cell-less, spermatogenesis associated 1 [Source:HGNC Symbol;Acc:HGNC:23843]
184	ENSG00000248740	LINC02428	-0.888118	-0.228635	-3.68176	0.00129235	0.279857	0.20165	26 x 31		4 q24	long intergenic non-protein coding RNA 2428 [Source:HGNC Symbol;Acc:HGNC:53359]
185	ENSG00000206838	SNORA5A	-0.333376	-0.146667	-3.6463	0.00130577	0.279857	0.202231	17 x 29		7 p13	small nucleolar RNA, H/ACA box 5A [Source:HGNC Symbol;Acc:HGNC:32588]
186	ENSG00000109794	FAM149A	-0.770425	-0.228168	-3.68967	0.00130649	0.279857	0.202262	12 x 8		4 q35	family with sequence similarity 149 member A [Source:HGNC Symbol;Acc:HGNC:24527]
187	ENSG00000201998	SNORA23	-0.384016	-0.162548	-3.52615	0.00131312	0.279857	0.202545	16 x 30		11 p15	small nucleolar RNA, H/ACA box 23 [Source:HGNC Symbol;Acc:HGNC:32613]
188	ENSG00000224549		-0.239035	-0.112581	-3.57431	0.00131603	0.279857	0.202669	13 x 14		9 p21
189	ENSG00000273175		0.353331	0.235271	3.69868	0.00132554	0.279857	0.203071	19 x 31		1 q44
190	ENSG00000253720		0.300924	0.195186	3.64486	0.00132791	0.279857	0.20317	13 x 20		8 q24
191	ENSG00000145808	ADAMTS19	-0.524497	-0.19777	-3.51432	0.00132974	0.279857	0.203247	1 x 35		5 q23	ADAM metallopeptidase with thrombospondin type 1 motif 19 [Source:HGNC Symbol;Acc:HGNC:17111]
192	ENSG00000112851	ERBIN	-0.35343	-0.153157	-3.66731	0.00133225	0.279857	0.203352	1 x 15	I	5 q12	erbb2 interacting protein [Source:HGNC Symbol;Acc:HGNC:15842]
193	ENSG00000239002	SCARNA10	-0.58285	-0.208584	-3.57674	0.00133562	0.388794	0.203492	29 x 36		12 p13	small Cajal body-specific RNA 10 [Source:HGNC Symbol;Acc:HGNC:32567]
194	ENSG00000106443	PHF14	-0.469887	-0.185621	-3.68324	0.0013591	0.388794	0.205181	28 x 20		7 p21	PHD finger protein 14 [Source:HGNC Symbol;Acc:HGNC:22203]
195	ENSG00000187715	KBTBD12	-1.28408	-0.163297	-3.66193	0.00139065	0.388794	0.207404	36 x 23	B	3 q21	kelch repeat and BTB domain containing 12 [Source:HGNC Symbol;Acc:HGNC:25731]
196	ENSG00000113369	ARRDC3	-0.482545	-0.188611	-3.64024	0.00139281	0.388794	0.207554	9 x 8		5 q14	arrestin domain containing 3 [Source:HGNC Symbol;Acc:HGNC:29263]
197	ENSG00000169902	TPST1	-0.514636	-0.195722	-3.68685	0.00139966	0.388794	0.208028	19 x 7		7 q11	tyrosylprotein sulfotransferase 1 [Source:HGNC Symbol;Acc:HGNC:12020]
198	ENSG00000274294		0.310094	0.202069	3.61226	0.0014104	0.388794	0.208768	15 x 23		15 q26
199	ENSG00000266968		-0.411328	-0.170412	-3.58064	0.00144842	0.388794	0.211336	4 x 1		18 q12
200	ENSG00000249846		-0.585208	-0.208974	-3.64221	0.00145113	0.388794	0.211517	5 x 32		3 q22	long intergenic non-protein coding RNA 2021 [Source:HGNC Symbol;Acc:HGNC:52856]
201	ENSG00000187953		-0.424006	-0.173896	-3.63296	0.00146315	0.388794	0.212312	7 x 18		7 p22	PMS2 C-terminal like pseudogene [Source:HGNC Symbol;Acc:HGNC:30061]
202	ENSG00000113161	HMGCR	-0.439306	-0.17796	-3.63513	0.00146347	0.388794	0.212333	1 x 12	I	5 q13	3-hydroxy-3-methylglutaryl-CoA reductase [Source:HGNC Symbol;Acc:HGNC:5006]
203	ENSG00000262580		0.61722	0.46457	3.58298	0.00147571	0.388794	0.213135	7 x 26	J	17 q25
204	ENSG00000225988	LAMP5-AS1	-0.346842	-0.151054	-3.51554	0.0015221	0.388794	0.216111	22 x 30		20 p12	LAMP5 antisense RNA 1 [Source:HGNC Symbol;Acc:HGNC:40754]
205	ENSG00000221867	MAGEA3	-0.426227	-0.174496	-3.41215	0.00152659	0.388794	0.216394	37 x 23	C	X q28	MAGE family member A3 [Source:HGNC Symbol;Acc:HGNC:6801]
206	ENSG00000221716	SNORA11	-0.652979	-0.218615	-3.51443	0.00153632	0.388794	0.217003	7 x 33		X p11	small nucleolar RNA, H/ACA box 11 [Source:HGNC Symbol;Acc:HGNC:32599]
207	ENSG00000212206		0.178981	0.108911	3.47998	0.00154437	0.388794	0.217504	16 x 9		17 p13	Small nucleolar RNA SNORA69 [Source:RFAM;Acc:RF00265]
208	ENSG00000162694	EXTL2	-0.319046	-0.141866	-3.56493	0.00154902	0.388794	0.217792	30 x 20		1 p21	exostosin like glycosyltransferase 2 [Source:HGNC Symbol;Acc:HGNC:3516]
209	ENSG00000280033		0.290082	0.187119	3.58203	0.00157476	0.388794	0.21937	16 x 19		17 q11
210	ENSG00000113583	C5orf15	-0.357352	-0.154396	-3.60103	0.0015802	0.388794	0.219699	1 x 15	I	5 q31	chromosome 5 open reading frame 15 [Source:HGNC Symbol;Acc:HGNC:20656]
211	ENSG00000234139		0.317945	0.208007	3.60323	0.00158081	0.388794	0.219736	15 x 16		20 q11
212	ENSG00000274070	CASTOR2	-0.58327	-0.208653	-3.57277	0.00158683	0.458964	0.220099	3 x 7	H	7 q11	cytosolic arginine sensor for mTORC1 subunit 2 [Source:HGNC Symbol;Acc:HGNC:37073]
213	ENSG00000198822	GRM3	-0.31266	-0.139684	-3.53355	0.00161638	0.458964	0.222213	24 x 31		7 q21	glutamate metabotropic receptor 3 [Source:HGNC Symbol;Acc:HGNC:4595]
214	ENSG00000253408	LOC101929897	0.223915	0.139563	3.5129	0.00161991	0.458964	0.222463	18 x 34		8 p11
215	ENSG00000274210		-0.381286	-0.161734	-3.38177	0.00167868	0.458964	0.22655	16 x 30		1 q21	U1 spliceosomal RNA [Source:RFAM;Acc:RF00003]
216	ENSG00000252010	SCARNA5	-0.591474	-0.209992	-3.46251	0.00168207	0.458964	0.226781	15 x 30		2 q37	small Cajal body-specific RNA 5 [Source:HGNC Symbol;Acc:HGNC:32561]
217	ENSG00000198874	TYW1	-0.226494	-0.107609	-3.45985	0.00169466	0.458964	0.227637	6 x 13		7 q11	tRNA-yW synthesizing protein 1 homolog [Source:HGNC Symbol;Acc:HGNC:25598]
218	ENSG00000258845		0.222066	0.138276	3.57588	0.00171563	0.458964	0.229048	19 x 33		14 q21
219	ENSG00000076344	RGS11	1.3034	1.27528	3.62543	0.00171587	0.458964	0.229064	13 x 40		16 p13	regulator of G protein signaling 11 [Source:HGNC Symbol;Acc:HGNC:9993]
220	ENSG00000199266	SNORA60	-0.234705	-0.110876	-3.41147	0.00173312	0.458964	0.230212	11 x 31		20 q11	small nucleolar RNA, H/ACA box 60 [Source:HGNC Symbol;Acc:HGNC:32654]
221	ENSG00000099994	SUSD2	1.36897	1.36897	3.59015	0.00173832	0.458964	0.230556	27 x 4		22 q11	sushi domain containing 2 [Source:HGNC Symbol;Acc:HGNC:30667]
222	ENSG00000219773		-0.494128	-0.191256	-3.53704	0.00174292	0.48789	0.230859	27 x 40		6 q21	ribosomal protein SA pseudogene 45 [Source:HGNC Symbol;Acc:HGNC:35857]
223	ENSG00000225208		-0.216326	-0.103502	-3.51463	0.00176862	0.48789	0.23264	7 x 36		10 q24
224	ENSG00000225867		0.421827	0.290385	3.57695	0.0017959	0.48789	0.234504	10 x 9		22 q13
225	ENSG00000231738	TSPAN19	-0.425275	-0.174239	-3.46643	0.00180503	0.48789	0.235121	23 x 28		12 q21	tetraspanin 19 [Source:HGNC Symbol;Acc:HGNC:31886]
226	ENSG00000277916		0.291133	0.187898	3.50167	0.00181362	0.48789	0.2357	6 x 22		1 p35	TUC338 [Source:RFAM;Acc:RF02271]
227	ENSG00000213033		0.281721	0.180951	3.55533	0.00182779	0.48789	0.236648	14 x 16		1 q41	aurora kinase A pseudogene 1 [Source:HGNC Symbol;Acc:HGNC:18611]
228	ENSG00000245213	LOC101930370	-0.421473	-0.173209	-3.51283	0.0018449	0.48789	0.237783	7 x 33		4 q34
229	ENSG00000099338	CATSPERG	0.497276	0.354668	3.44219	0.00191018	0.48789	0.242024	4 x 26		19 q13	cation channel sperm associated auxiliary subunit gamma [Source:HGNC Symbol;Acc:HGNC:25243]
230	ENSG00000211661		-0.27107	-0.124812	-3.22199	0.00191832	0.48789	0.242542	33 x 8		22 q11	immunoglobulin lambda variable 3-22 (gene/pseudogene) [Source:HGNC Symbol;Acc:HGNC:5906]
231	ENSG00000259520		-0.643304	-0.217424	-3.51293	0.00193027	0.48789	0.2433	6 x 31		15 q21
232	ENSG00000234722	LINC01287	-0.30706	-0.137747	-3.30834	0.00194437	0.48789	0.244187	26 x 32		7 q36	long intergenic non-protein coding RNA 1287 [Source:HGNC Symbol;Acc:HGNC:50351]
233	ENSG00000179826	MRGPRX3	-0.210994	-0.101321	-3.45287	0.0019448	0.48789	0.244215	13 x 9		11 p15	MAS related GPR family member X3 [Source:HGNC Symbol;Acc:HGNC:17980]
234	ENSG00000243349		-0.24463	-0.114766	-3.35574	0.00194515	0.48789	0.244236	23 x 30		10 q11
235	ENSG00000006611	USH1C	-0.706825	-0.224121	-3.45025	0.00198397	0.48789	0.246646	28 x 27		11 p15	USH1 protein network component harmonin [Source:HGNC Symbol;Acc:HGNC:12597]
236	ENSG00000232023		-0.73298	-0.226108	-3.46265	0.00198573	0.48789	0.246755	26 x 30		2 q36	long intergenic non-protein coding RNA 1807 [Source:HGNC Symbol;Acc:HGNC:52610]
237	ENSG00000161558	TMEM143	0.484882	0.343851	3.53638	0.00200573	0.48789	0.247977	18 x 15		19 q13	transmembrane protein 143 [Source:HGNC Symbol;Acc:HGNC:25603]
238	ENSG00000145626	UGT3A1	-0.363685	-0.156374	-3.32787	0.00202997	0.48789	0.249442	24 x 31		5 p13	UDP glycosyltransferase family 3 member A1 [Source:HGNC Symbol;Acc:HGNC:26625]
239	ENSG00000249271		0.195372	0.119938	3.47209	0.00203925	0.48789	0.249997	24 x 36		15 q22	heterogeneous nuclear ribonucleoprotein A1 pseudogene 44 [Source:HGNC Symbol;Acc:HGNC:48774]
240	ENSG00000224067		0.338957	0.224097	3.52352	0.00204586	0.48789	0.250392	11 x 31		9 q31
241	ENSG00000272625		-0.331397	-0.146012	-3.43497	0.00205817	0.527803	0.251123	16 x 22		18 p11
242	ENSG00000175315	CST6	-0.706026	-0.224054	-3.42096	0.00209921	0.527803	0.253723	37 x 14		11 q13	cystatin E/M [Source:HGNC Symbol;Acc:HGNC:2478]
243	ENSG00000182111	ZNF716	-0.758238	-0.227598	-3.43615	0.00210839	0.527803	0.254298	26 x 31		7 p11	zinc finger protein 716 [Source:HGNC Symbol;Acc:HGNC:32458]
244	ENSG00000226161		0.267378	0.170477	3.50244	0.00213788	0.527803	0.256129	25 x 36		13 q13	eukaryotic translation initiation factor 4A1 pseudogene 5 [Source:HGNC Symbol;Acc:HGNC:37924]
245	ENSG00000252391		-0.218323	-0.104314	-3.47507	0.00214459	0.527803	0.256542	8 x 16		17 q25	RNA, U6 small nuclear 638, pseudogene [Source:HGNC Symbol;Acc:HGNC:47601]
246	ENSG00000236337		0.467994	0.329275	3.49742	0.00220449	0.527803	0.260176	10 x 22		X q27	FMR1 intronic transcript 1 [Source:HGNC Symbol;Acc:HGNC:41333]
247	ENSG00000149929	HIRIP3	0.364655	0.24417	3.42785	0.00225877	0.527803	0.263385	17 x 40		16 p11	HIRA interacting protein 3 [Source:HGNC Symbol;Acc:HGNC:4917]
248	ENSG00000171551	ECEL1	-1.1973	-0.186442	-3.44476	0.00227735	0.527803	0.264466	32 x 25	B	2 q37	endothelin converting enzyme like 1 [Source:HGNC Symbol;Acc:HGNC:3147]
249	ENSG00000107807	TLX1	-0.266586	-0.123141	-3.29253	0.00228029	0.527803	0.264636	32 x 26	B	10 q24	T-cell leukemia homeobox 1 [Source:HGNC Symbol;Acc:HGNC:5056]
250	ENSG00000117010	ZNF684	-0.393478	-0.165328	-3.43088	0.002296	0.527803	0.265542	20 x 31		1 p34	zinc finger protein 684 [Source:HGNC Symbol;Acc:HGNC:28418]
251	ENSG00000267784		-0.208877	-0.10045	-3.3978	0.00233072	0.527803	0.267522	13 x 11		2 q31
252	ENSG00000237217		0.28377	0.182458	3.47297	0.0023398	0.527803	0.268035	14 x 17		2 p14
253	ENSG00000145907	G3BP1	0.277368	0.177758	3.40675	0.00239068	0.527803	0.270873	29 x 14		5 q33	G3BP stress granule assembly factor 1 [Source:HGNC Symbol;Acc:HGNC:30292]
254	ENSG00000255065		-0.204331	-0.0985689	-3.32816	0.00239997	0.527803	0.271384	26 x 11		11 q22
255	ENSG00000110066	KMT5B	-0.319397	-0.141985	-3.41956	0.00242143	0.527803	0.272557	4 x 15		11 q13	lysine methyltransferase 5B [Source:HGNC Symbol;Acc:HGNC:24283]
256	ENSG00000267429		-0.286593	-0.130496	-3.4148	0.00243042	0.527803	0.273046	20 x 32		19 q13
257	ENSG00000228789	HCG22	-0.305694	-0.137272	-3.38591	0.00244446	0.527803	0.273805	15 x 9		6 p21	HLA complex group 22 [Source:HGNC Symbol;Acc:HGNC:27780]
258	ENSG00000275538	RNVU1-19	-0.407491	-0.169337	-3.30386	0.00245199	0.527803	0.27421	16 x 30		1 p11	RNA, variant U1 small nuclear 19 [Source:HGNC Symbol;Acc:HGNC:48324]
259	ENSG00000272516		-0.337235	-0.147936	-3.43396	0.00247583	0.527803	0.275484	21 x 35		10 p12
260	ENSG00000225017		0.259695	0.164922	3.40843	0.00249216	0.527803	0.27635	12 x 19		8 q22
261	ENSG00000138653	NDST4	-0.283047	-0.129211	-3.38599	0.0024993	0.527803	0.276727	1 x 18		4 q26	N-deacetylase and N-sulfotransferase 4 [Source:HGNC Symbol;Acc:HGNC:20779]
262	ENSG00000236017		0.884364	0.743369	3.44209	0.00253701	0.527803	0.278697	8 x 26	J	X p22	ASMTL antisense RNA 1 [Source:HGNC Symbol;Acc:HGNC:25811]
263	ENSG00000248559		-0.19314	-0.0938814	-3.32412	0.00255597	0.527803	0.279677	13 x 33		5 q31
264	ENSG00000253251		-0.388558	-0.16389	-3.37194	0.00255999	0.527803	0.279883	21 x 39		5 q12	Uncharacterized protein FLJ26957 [Source:UniProtKB/Swiss-Prot;Acc:Q6ZNX1]
265	ENSG00000006062	MAP3K14	0.364957	0.244408	3.39313	0.00257381	0.527803	0.280591	32 x 8		17 q21	mitogen-activated protein kinase kinase kinase 14 [Source:HGNC Symbol;Acc:HGNC:6853]
266	ENSG00000071189	SNX13	-0.446636	-0.179852	-3.43398	0.00257476	0.527803	0.280639	2 x 14	I	7 p21	sorting nexin 13 [Source:HGNC Symbol;Acc:HGNC:21335]
267	ENSG00000125991	ERGIC3	-0.372333	-0.159033	-3.38818	0.00258176	0.527803	0.280996	35 x 34		20 q11	ERGIC and golgi 3 [Source:HGNC Symbol;Acc:HGNC:15927]
268	ENSG00000206129		-1.12146	-0.202614	-3.43693	0.0025924	0.527803	0.281537	26 x 30		18 q21
269	ENSG00000257252		-0.4027	-0.167981	-3.39217	0.0025957	0.527803	0.281704	21 x 32		12 q22
270	ENSG00000183674		-0.280141	-0.128153	-3.36961	0.00260952	0.527803	0.282401	37 x 18		6 p24	long intergenic non-protein coding RNA 518 [Source:HGNC Symbol;Acc:HGNC:28626]
271	ENSG00000154237	LRRK1	0.634987	0.481655	3.37484	0.00263034	0.527803	0.283444	9 x 7		15 q26	leucine rich repeat kinase 1 [Source:HGNC Symbol;Acc:HGNC:18608]
272	ENSG00000131871	SELENOS	0.304133	0.197589	3.31832	0.0026506	0.527803	0.284451	39 x 34		15 q26	selenoprotein S [Source:HGNC Symbol;Acc:HGNC:30396]
273	ENSG00000223969		-0.492716	-0.190938	-3.36022	0.00266145	0.527803	0.284986	32 x 36		7 q21
274	ENSG00000274019		-0.287612	-0.130863	-3.3748	0.00268745	0.527803	0.28626	19 x 35		1 q21
275	ENSG00000153015	CWC27	-0.441457	-0.178519	-3.41019	0.00270739	0.527803	0.287228	21 x 36		5 q12	CWC27 spliceosome associated protein homolog [Source:HGNC Symbol;Acc:HGNC:10664]
276	ENSG00000197870	PRB3	-0.509385	-0.194604	-3.33257	0.00272362	0.527803	0.288011	26 x 30		12 p13	proline rich protein BstNI subfamily 3 [Source:HGNC Symbol;Acc:HGNC:9339]
277	ENSG00000112195	TREML2	-0.660095	-0.219452	-3.32583	0.00272714	0.527803	0.28818	25 x 26		6 p21	triggering receptor expressed on myeloid cells like 2 [Source:HGNC Symbol;Acc:HGNC:21092]
278	ENSG00000273368		-0.296253	-0.133953	-3.36331	0.002728	0.527803	0.288221	18 x 34		18 p11
279	ENSG00000104112	SCG3	-0.400381	-0.167319	-3.19234	0.00278701	0.527803	0.291018	28 x 26		15 q21	secretogranin III [Source:HGNC Symbol;Acc:HGNC:13707]
280	ENSG00000164253	WDR41	-0.356765	-0.154211	-3.3866	0.00281381	0.527803	0.292267	22 x 35		5 q14	WD repeat domain 41 [Source:HGNC Symbol;Acc:HGNC:25601]
281	ENSG00000149646	CNBD2	-0.362574	-0.156029	-3.35291	0.0028316	0.527803	0.293089	28 x 33		20 q11	cyclic nucleotide binding domain containing 2 [Source:HGNC Symbol;Acc:HGNC:16145]
282	ENSG00000134987	WDR36	-0.349223	-0.151818	-3.36415	0.00286642	0.527803	0.29468	3 x 14		5 q22	WD repeat domain 36 [Source:HGNC Symbol;Acc:HGNC:30696]
283	ENSG00000126215	XRCC3	0.516524	0.371667	3.37992	0.00286662	0.527803	0.294689	19 x 18		14 q32	X-ray repair cross complementing 3 [Source:HGNC Symbol;Acc:HGNC:12830]
284	ENSG00000155329	ZCCHC10	-0.380357	-0.161457	-3.37586	0.00287449	0.527803	0.295046	20 x 39		5 q31	zinc finger CCHC-type containing 10 [Source:HGNC Symbol;Acc:HGNC:25954]
285	ENSG00000253369		-0.376789	-0.160384	-3.23364	0.00287623	0.527803	0.295125	22 x 28		8 q11
286	ENSG00000278259	MYO19	0.366036	0.24526	3.35328	0.00290504	0.527803	0.296421	24 x 18		17 q12	myosin XIX [Source:HGNC Symbol;Acc:HGNC:26234]
287	ENSG00000265060	PPY2P	-0.375237	-0.159915	-3.27733	0.00290625	0.527803	0.296475	28 x 30		17 q11	pancreatic polypeptide 2, pseudogene [Source:HGNC Symbol;Acc:HGNC:9328]
288	ENSG00000243701	DUBR	-0.424954	-0.174152	-3.33904	0.00292396	0.527803	0.297264	1 x 19		3 q13	DPPA2 upstream binding RNA [Source:HGNC Symbol;Acc:HGNC:48569]
289	ENSG00000250122		-0.215867	-0.103314	-3.2649	0.00296258	0.527803	0.298967	24 x 33		5 p12
290	ENSG00000172795	DCP2	-0.324373	-0.143667	-3.33855	0.00297698	0.527803	0.299595	4 x 16		5 q22	decapping mRNA 2 [Source:HGNC Symbol;Acc:HGNC:24452]
291	ENSG00000121552	CSTA	-0.777238	-0.228443	-3.32613	0.00299356	0.527803	0.300314	39 x 8	D	3 q21	cystatin A [Source:HGNC Symbol;Acc:HGNC:2481]
292	ENSG00000143184	XCL1	-0.808544	-0.229317	-3.33631	0.00299785	0.527803	0.300499	37 x 6		1 q24	X-C motif chemokine ligand 1 [Source:HGNC Symbol;Acc:HGNC:10645]
293	ENSG00000186687	LYRM7	-0.395411	-0.165888	-3.31191	0.00303692	0.527803	0.302174	2 x 16		5 q23	LYR motif containing 7 [Source:HGNC Symbol;Acc:HGNC:28072]
294	ENSG00000181904	C5orf24	-0.397838	-0.166589	-3.34795	0.00307292	0.527803	0.303695	1 x 15	I	5 q31	chromosome 5 open reading frame 24 [Source:HGNC Symbol;Acc:HGNC:26746]
295	ENSG00000120328	PCDHB12	-0.825881	-0.229523	-3.3454	0.00308697	0.527803	0.304283	7 x 2		5 q31	protocadherin beta 12 [Source:HGNC Symbol;Acc:HGNC:8683]
296	ENSG00000017260	ATP2C1	-0.374433	-0.159672	-3.34304	0.00312328	0.527803	0.305788	30 x 19		3 q22	ATPase secretory pathway Ca2+ transporting 1 [Source:HGNC Symbol;Acc:HGNC:13211]
297	ENSG00000236869		-0.28646	-0.130448	-3.32429	0.00314664	0.527803	0.306746	10 x 12		3 p21
298	ENSG00000254416		-0.386872	-0.163393	-3.271	0.00314786	0.527803	0.306796	35 x 23	B	11 q22
299	ENSG00000229771		-0.293405	-0.13294	-3.29698	0.00315455	0.527803	0.307069	14 x 12		20 q12
300	ENSG00000227877	MRLN	-0.375555	-0.160011	-3.18714	0.00316172	0.527803	0.30736	22 x 30		10 q21	myoregulin [Source:HGNC Symbol;Acc:HGNC:48649]
301	ENSG00000244165	P2RY11	0.488201	0.346738	3.3019	0.00317694	0.527803	0.307976	18 x 21		19 p13	purinergic receptor P2Y11 [Source:HGNC Symbol;Acc:HGNC:8540]
302	ENSG00000225385		0.454647	0.317887	3.33437	0.00318229	0.527803	0.308192	4 x 29		9 q22
303	ENSG00000102287	GABRE	1.13787	1.05135	3.30291	0.00318297	0.527803	0.30822	40 x 10	D	X q28	gamma-aminobutyric acid type A receptor epsilon subunit [Source:HGNC Symbol;Acc:HGNC:4085]
304	ENSG00000164631	ZNF12	-0.425032	-0.174174	-3.34031	0.00319772	0.527803	0.308812	4 x 15		7 p22	zinc finger protein 12 [Source:HGNC Symbol;Acc:HGNC:12902]
305	ENSG00000238021		-0.220174	-0.105064	-3.26322	0.00320693	0.567995	0.30918	20 x 30		10 p12	armadillo repeat containing 4 pseudogene 1 [Source:HGNC Symbol;Acc:HGNC:44937]
306	ENSG00000256196		-0.30916	-0.138476	-3.26256	0.00327166	0.567995	0.311993	34 x 29		11 q12
307	ENSG00000272755		-0.296104	-0.1339	-3.24926	0.00331909	0.567995	0.314016	14 x 32		1 q21
308	ENSG00000131037	EPS8L1	0.489927	0.348241	3.27552	0.00333412	0.567995	0.31465	20 x 15		19 q13	EPS8 like 1 [Source:HGNC Symbol;Acc:HGNC:21295]
309	ENSG00000263711	LOC400655	-0.633577	-0.216164	-3.19237	0.0033343	0.567995	0.314657	26 x 31		18 q22
310	ENSG00000279463		0.286009	0.184109	3.3073	0.00338361	0.567995	0.316716	14 x 14		13 q22
311	ENSG00000106415	GLCCI1	-0.556623	-0.204001	-3.31085	0.00338442	0.567995	0.31675	1 x 19		7 p21	glucocorticoid induced 1 [Source:HGNC Symbol;Acc:HGNC:18713]
312	ENSG00000173376	NDNF	-0.805599	-0.229262	-3.28344	0.00339136	0.567995	0.317037	5 x 1		4 q27	neuron derived neurotrophic factor [Source:HGNC Symbol;Acc:HGNC:26256]
313	ENSG00000248144	ADH1C	-0.503305	-0.193288	-3.20665	0.00341586	0.567995	0.318044	13 x 1		4 q23	alcohol dehydrogenase 1C (class I), gamma polypeptide [Source:HGNC Symbol;Acc:HGNC:251]
314	ENSG00000258636		-0.310577	-0.138966	-3.24142	0.00343793	0.567995	0.318946	16 x 7		14 q21
315	ENSG00000268601		-0.323287	-0.143301	-3.267	0.00347123	0.567995	0.320293	33 x 11		19 q13
316	ENSG00000229876	CASC20	-0.366853	-0.157354	-3.21659	0.00347215	0.567995	0.32033	26 x 31		20 p12	cancer susceptibility 20 (non-protein coding) [Source:HGNC Symbol;Acc:HGNC:49477]
317	ENSG00000223478	LOC100506100	-0.414663	-0.171339	-3.25275	0.00348189	0.567995	0.320721	17 x 39		9 q34
318	ENSG00000113296	THBS4	-0.832382	-0.22955	-3.25252	0.00354598	0.567995	0.323265	11 x 1		5 q14	thrombospondin 4 [Source:HGNC Symbol;Acc:HGNC:11788]
319	ENSG00000226508	LINC01918	-0.412787	-0.170819	-3.19585	0.0035461	0.567995	0.323269	18 x 7		2 q12	long intergenic non-protein coding RNA 1918 [Source:HGNC Symbol;Acc:HGNC:52737]
320	ENSG00000231013	LOC107105282	-0.2448	-0.114832	-3.1762	0.00360019	0.567995	0.325375	14 x 10		2 q14
321	ENSG00000157895	C12orf43	-0.364002	-0.156473	-3.27774	0.00361088	0.567995	0.325788	23 x 34		12 q24	chromosome 12 open reading frame 43 [Source:HGNC Symbol;Acc:HGNC:25719]
322	ENSG00000046774	MAGEC2	-0.741601	-0.226664	-3.12822	0.00364681	0.567995	0.327162	26 x 31		X q27	MAGE family member C2 [Source:HGNC Symbol;Acc:HGNC:13574]
323	ENSG00000189043	NDUFA4	-0.475998	-0.187078	-3.24679	0.00369104	0.567995	0.328833	36 x 37		7 p21	NDUFA4, mitochondrial complex associated [Source:HGNC Symbol;Acc:HGNC:7687]
324	ENSG00000204933		-0.1596	-0.0793394	-3.19787	0.00369803	0.567995	0.329095	21 x 34		19 q13	CD177 molecule pseudogene 1 [Source:HGNC Symbol;Acc:HGNC:34508]
325	ENSG00000102034	ELF4	0.425358	0.29331	3.21845	0.00373575	0.567995	0.330498	28 x 9		X q26	E74 like ETS transcription factor 4 [Source:HGNC Symbol;Acc:HGNC:3319]
326	ENSG00000164879	CA3	-0.620261	-0.214338	-3.22934	0.0037506	0.567995	0.331046	13 x 5		8 q21	carbonic anhydrase 3 [Source:HGNC Symbol;Acc:HGNC:1374]
327	ENSG00000124196	GTSF1L	-0.232102	-0.109845	-3.18735	0.00375328	0.567995	0.331145	33 x 10		20 q13	gametocyte specific factor 1 like [Source:HGNC Symbol;Acc:HGNC:16198]
328	ENSG00000021852	C8B	-0.185202	-0.0905068	-3.17729	0.00375387	0.567995	0.331167	19 x 33		1 p32	complement C8 beta chain [Source:HGNC Symbol;Acc:HGNC:1353]
329	ENSG00000240137	ERICH6-AS1	-0.522404	-0.197341	-3.23301	0.00375522	0.567995	0.331217	3 x 32		3 q25	ERICH6 antisense RNA 1 [Source:HGNC Symbol;Acc:HGNC:41205]
330	ENSG00000140015	KCNH5	-0.426363	-0.174532	-3.17116	0.00376656	0.567995	0.331633	24 x 29		14 q23	potassium voltage-gated channel subfamily H member 5 [Source:HGNC Symbol;Acc:HGNC:6254]
331	ENSG00000164219	PGGT1B	-0.301126	-0.135673	-3.24495	0.00379093	0.567995	0.332522	1 x 15	I	5 q22	protein geranylgeranyltransferase type I subunit beta [Source:HGNC Symbol;Acc:HGNC:8895]
332	ENSG00000238099	LINC01625	-0.272128	-0.125204	-3.21983	0.00380124	0.567995	0.332896	35 x 19		6 q24	long intergenic non-protein coding RNA 1625 [Source:HGNC Symbol;Acc:HGNC:52052]
333	ENSG00000169660	HEXDC	0.445654	0.310282	3.23113	0.00384043	0.567995	0.334308	8 x 30		17 q25	hexosaminidase D [Source:HGNC Symbol;Acc:HGNC:26307]
334	ENSG00000259665		0.282274	0.181357	3.22612	0.00384949	0.567995	0.334632	12 x 31		15 q14
335	ENSG00000111144	LTA4H	-0.418317	-0.172346	-3.23844	0.00385075	0.567995	0.334677	22 x 37		12 q23	leukotriene A4 hydrolase [Source:HGNC Symbol;Acc:HGNC:6710]
336	ENSG00000213355		-0.262155	-0.121476	-3.10167	0.00385382	0.567995	0.334787	25 x 31		2 q11	calponin 2 pseudogene 8 [Source:HGNC Symbol;Acc:HGNC:39533]
337	ENSG00000157322	CLEC18A	-0.525178	-0.197909	-3.16441	0.00385417	0.567995	0.3348	26 x 28		16 q22	C-type lectin domain family 18 member A [Source:HGNC Symbol;Acc:HGNC:30388]
338	ENSG00000253123		-0.383902	-0.162514	-3.15717	0.00389719	0.567995	0.336324	20 x 8		8 p11
339	ENSG00000227777		-0.250103	-0.116883	-3.09791	0.00392209	0.567995	0.337197	25 x 31		1 q24
340	ENSG00000184986	TMEM121	0.721309	0.567617	3.23734	0.00392496	0.567995	0.337297	2 x 34		14 q32	transmembrane protein 121 [Source:HGNC Symbol;Acc:HGNC:20511]
341	ENSG00000260249	LOC101927272	0.372545	0.25042	3.20093	0.00392871	0.567995	0.337428	17 x 24		16 q12
342	ENSG00000241973	PI4KA	0.343848	0.227884	3.16836	0.00393527	0.567995	0.337657	1 x 8	H	22 q11	phosphatidylinositol 4-kinase alpha [Source:HGNC Symbol;Acc:HGNC:8983]
343	ENSG00000130287	NCAN	-0.361082	-0.155564	-3.15916	0.00394094	0.58081	0.337854	32 x 23	B	19 p13	neurocan [Source:HGNC Symbol;Acc:HGNC:2465]
344	ENSG00000203907	OOEP	-0.497879	-0.192093	-3.0815	0.00401436	0.58081	0.340458	17 x 24		6 q13	oocyte expressed protein [Source:HGNC Symbol;Acc:HGNC:21382]
345	ENSG00000011590	ZBTB32	0.420494	0.289283	3.20589	0.0040345	0.58081	0.341163	34 x 7		19 q13	zinc finger and BTB domain containing 32 [Source:HGNC Symbol;Acc:HGNC:16763]
346	ENSG00000217159		0.194227	0.119162	3.13734	0.00404878	0.58081	0.34166	9 x 15		6 p22	La ribonucleoprotein domain family member 1 pseudogene 1 [Source:HGNC Symbol;Acc:HGNC:23183]
347	ENSG00000254238		-0.405775	-0.168853	-3.15772	0.00407407	0.58081	0.342536	25 x 28		8 q21
348	ENSG00000196427	NBPF4	-0.218723	-0.104476	-3.07194	0.00412243	0.58081	0.344192	6 x 36		1 p13	NBPF member 4 [Source:HGNC Symbol;Acc:HGNC:26550]
349	ENSG00000256061	DNAAF4	-0.417911	-0.172234	-3.18092	0.00412334	0.58081	0.344223	3 x 39		15 q21	dynein axonemal assembly factor 4 [Source:HGNC Symbol;Acc:HGNC:21493]
350	ENSG00000242759	LINC00882	-0.483746	-0.18889	-3.18979	0.00415413	0.58081	0.345265	21 x 27		3 q13	long intergenic non-protein coding RNA 882 [Source:HGNC Symbol;Acc:HGNC:48568]
351	ENSG00000205628	LINC01446	-0.60512	-0.21212	-3.13753	0.00416433	0.58081	0.345609	26 x 31		7 p12	long intergenic non-protein coding RNA 1446 [Source:HGNC Symbol;Acc:HGNC:50773]
352	ENSG00000235721		0.416272	0.2858	3.20098	0.00423829	0.58081	0.348069	15 x 21		2 q13
353	ENSG00000128191	DGCR8	0.265796	0.16933	3.19037	0.0042648	0.58081	0.348938	17 x 19		22 q11	DGCR8, microprocessor complex subunit [Source:HGNC Symbol;Acc:HGNC:2847]
354	ENSG00000124159	MATN4	-0.573339	-0.206974	-3.16541	0.00426558	0.58081	0.348963	32 x 25	B	20 q13	matrilin 4 [Source:HGNC Symbol;Acc:HGNC:6910]
355	ENSG00000272777		-0.332629	-0.14642	-3.17228	0.00426595	0.58081	0.348975	14 x 29		4 q23
356	ENSG00000237352		-0.267367	-0.123433	-3.06972	0.00426595	0.58081	0.348975	19 x 27		1 p32	long intergenic non-protein coding RNA 1358 [Source:HGNC Symbol;Acc:HGNC:50589]
357	ENSG00000167355		-0.420815	-0.173029	-3.17424	0.00428109	0.58081	0.349468	24 x 31		11 p15
358	ENSG00000188306	LRRIQ4	-0.50298	-0.193217	-3.1781	0.0042888	0.58081	0.349719	24 x 32		3 q26	leucine rich repeats and IQ motif containing 4 [Source:HGNC Symbol;Acc:HGNC:34298]
359	ENSG00000262117	BCAR4	-0.273843	-0.125839	-3.02334	0.00431096	0.58081	0.350436	24 x 34		16 p13	breast cancer anti-estrogen resistance 4 (non-protein coding) [Source:HGNC Symbol;Acc:HGNC:22170]
360	ENSG00000232926		0.322233	0.211267	3.18379	0.00431239	0.58081	0.350482	7 x 21		22 q11
361	ENSG00000115421	PAPOLG	-0.267775	-0.123585	-3.17497	0.00432145	0.58081	0.350773	30 x 19		2 p16	poly(A) polymerase gamma [Source:HGNC Symbol;Acc:HGNC:14982]
362	ENSG00000153317	ASAP1	0.348677	0.231638	3.15089	0.00434406	0.58081	0.351498	26 x 9		8 q24	ArfGAP with SH3 domain, ankyrin repeat and PH domain 1 [Source:HGNC Symbol;Acc:HGNC:2720]
363	ENSG00000113048	MRPS27	-0.518937	-0.196623	-3.21449	0.00435034	0.58081	0.351698	1 x 17		5 q13	mitochondrial ribosomal protein S27 [Source:HGNC Symbol;Acc:HGNC:14512]
364	ENSG00000281376	ABALON	-0.352517	-0.152868	-3.17503	0.00435573	0.604399	0.35187	24 x 17		20 q11	apoptotic BCL2L1-antisense long non-coding RNA [Source:HGNC Symbol;Acc:HGNC:49667]
365	ENSG00000146001	PCDHB18P	-0.437013	-0.177361	-3.15116	0.00439397	0.604399	0.353154	17 x 6		5 q31	protocadherin beta 18 pseudogene [Source:HGNC Symbol;Acc:HGNC:14548]
366	ENSG00000113595	TRIM23	-0.340822	-0.149107	-3.18015	0.00440098	0.604399	0.353388	1 x 16	I	5 q12	tripartite motif containing 23 [Source:HGNC Symbol;Acc:HGNC:660]
367	ENSG00000006128	TAC1	-0.41068	-0.170231	-3.08542	0.00444501	0.604399	0.354848	15 x 6		7 q21	tachykinin precursor 1 [Source:HGNC Symbol;Acc:HGNC:11517]
368	ENSG00000251602	LOC100507437	0.530093	0.383797	3.17598	0.00449121	0.604399	0.356362	6 x 34		14 q32
369	ENSG00000237399	PITRM1-AS1	0.439639	0.305223	3.18545	0.0045517	0.604399	0.358316	10 x 23		10 p15	PITRM1 antisense RNA 1 [Source:HGNC Symbol;Acc:HGNC:44675]
370	ENSG00000240682	ISY1	-0.2586	-0.120131	-3.13837	0.00456065	0.604399	0.358603	34 x 31		3 q21	ISY1 splicing factor homolog [Source:HGNC Symbol;Acc:HGNC:29201]
371	ENSG00000101236	RNF24	-0.395134	-0.165808	-3.15519	0.00456177	0.604399	0.358638	25 x 22		20 p13	ring finger protein 24 [Source:HGNC Symbol;Acc:HGNC:13779]
372	ENSG00000226086		-0.185545	-0.0906531	-3.11364	0.00458443	0.604399	0.359361	17 x 33		10 p11	eukaryotic translation initiation factor 3 subunit L pseudogene 3 [Source:HGNC Symbol;Acc:HGNC:44976]
373	ENSG00000253105	LOC102724804	-0.222216	-0.105889	-3.15125	0.00461918	0.604399	0.36046	16 x 10		8 q22
374	ENSG00000265800		0.421985	0.290516	3.17777	0.00465549	0.604399	0.361598	13 x 23		17 q25
375	ENSG00000186567	CEACAM19	0.739264	0.586113	3.16301	0.00466284	0.604399	0.361827	15 x 24		19 q13	carcinoembryonic antigen related cell adhesion molecule 19 [Source:HGNC Symbol;Acc:HGNC:31951]
376	ENSG00000266200	PNLIPRP2	-0.156736	-0.0780632	-3.05365	0.00472804	0.604399	0.363841	20 x 36		10 q25	pancreatic lipase related protein 2 (gene/pseudogene) [Source:HGNC Symbol;Acc:HGNC:9157]
377	ENSG00000113073	SLC4A9	-0.302825	-0.136269	-3.07472	0.00473533	0.604399	0.364064	16 x 21		5 q31	solute carrier family 4 member 9 [Source:HGNC Symbol;Acc:HGNC:11035]
378	ENSG00000261220		0.379292	0.255797	3.07183	0.00475074	0.604399	0.364534	10 x 29		8 q24
379	ENSG00000106392	C1GALT1	-0.430963	-0.175763	-3.14647	0.00475818	0.604399	0.364761	35 x 18		7 p22	core 1 synthase, glycoprotein-N-acetylgalactosamine 3-beta-galactosyltransferase 1 [Source:HGNC Symbol;Acc:HGNC:24337]
380	ENSG00000196104	SPOCK3	-0.854956	-0.229426	-3.09698	0.00476487	0.604399	0.364964	9 x 1		4 q32	SPARC/osteonectin, cwcv and kazal like domains proteoglycan 3 [Source:HGNC Symbol;Acc:HGNC:13565]
381	ENSG00000276505		0.361891	0.24199	3.17259	0.00478012	0.604399	0.365426	15 x 20		11 q23
382	ENSG00000199436	SNORD9	-0.296064	-0.133886	-3.10888	0.00483437	0.604399	0.367054	15 x 31		14 q11	small nucleolar RNA, C/D box 9 [Source:HGNC Symbol;Acc:HGNC:32705]
383	ENSG00000226917	LINC01276	-0.213651	-0.10241	-3.10309	0.00492577	0.604399	0.369749	24 x 23		6 p21	long intergenic non-protein coding RNA 1276 [Source:HGNC Symbol;Acc:HGNC:50333]
384	ENSG00000163611	SPICE1	-0.391969	-0.164888	-3.15369	0.00493089	0.604399	0.369898	1 x 18		3 q13	spindle and centriole associated protein 1 [Source:HGNC Symbol;Acc:HGNC:25083]
385	ENSG00000226179		0.658234	0.504322	3.16897	0.00499336	0.604399	0.371702	11 x 25		X p22	long intergenic non-protein coding RNA 685 [Source:HGNC Symbol;Acc:HGNC:27560]
386	ENSG00000224786		-0.301712	-0.135879	-3.10581	0.00499829	0.604399	0.371843	22 x 30		4 q27	centrin 4, pseudogene [Source:HGNC Symbol;Acc:HGNC:35450]
387	ENSG00000271815		-0.231508	-0.109609	-3.1102	0.00503619	0.604399	0.372923	14 x 33		5 q13
388	ENSG00000224905		-0.435903	-0.17707	-3.09774	0.00504501	0.604399	0.373173	21 x 28		21 q11
389	ENSG00000160360	GPSM1	0.311375	0.203035	2.99305	0.00505034	0.604399	0.373323	30 x 27		9 q34	G protein signaling modulator 1 [Source:HGNC Symbol;Acc:HGNC:17858]
390	ENSG00000206585	RNVU1-7	-0.698331	-0.22338	-3.0519	0.00506745	0.604399	0.373806	28 x 36		1 q21	RNA, variant U1 small nuclear 7 [Source:HGNC Symbol;Acc:HGNC:37500]
391	ENSG00000267908		-0.378406	-0.160871	-3.0979	0.0050951	0.604399	0.374582	17 x 20		19 q13	zinc finger and SCAN domain containing 5D pseudogene [Source:HGNC Symbol;Acc:HGNC:37706]
392	ENSG00000230622		0.223658	0.139385	3.10844	0.0051083	0.604399	0.37495	19 x 32		6 p21	ubiquinol-cytochrome c reductase hinge protein pseudogene 1 [Source:HGNC Symbol;Acc:HGNC:31341]
393	ENSG00000258331	LINC02461	-0.28344	-0.129354	-3.11673	0.00510921	0.604399	0.374975	16 x 9		12 q12	long intergenic non-protein coding RNA 2461 [Source:HGNC Symbol;Acc:HGNC:53398]
394	ENSG00000169683	LRRC45	0.434246	0.300708	3.1101	0.0051099	0.604399	0.374994	40 x 32	A	17 q25	leucine rich repeat containing 45 [Source:HGNC Symbol;Acc:HGNC:28302]
395	ENSG00000152430	BOLL	-0.382224	-0.162015	-3.08325	0.00514985	0.604399	0.376102	26 x 30		2 q33	boule homolog, RNA binding protein [Source:HGNC Symbol;Acc:HGNC:14273]
396	ENSG00000099917	MED15	0.323166	0.211978	3.08605	0.00518164	0.604399	0.376975	20 x 13		22 q11	mediator complex subunit 15 [Source:HGNC Symbol;Acc:HGNC:14248]
397	ENSG00000102057	KCND1	-0.590501	-0.209835	-3.08861	0.00520147	0.604399	0.377517	14 x 7		X p11	potassium voltage-gated channel subfamily D member 1 [Source:HGNC Symbol;Acc:HGNC:6237]
398	ENSG00000179083	FAM133A	-0.594409	-0.21046	-3.0141	0.00521572	0.604399	0.377905	25 x 30		X q21	family with sequence similarity 133 member A [Source:HGNC Symbol;Acc:HGNC:26748]
399	ENSG00000223558		-0.246944	-0.115664	-3.0723	0.00522863	0.604399	0.378255	21 x 29		7 q11	tripartite motif containing 60 pseudogene 17 [Source:HGNC Symbol;Acc:HGNC:38489]
400	ENSG00000256128		-0.784994	-0.22872	-3.10987	0.00523534	0.604399	0.378436	37 x 8		12 q24	long intergenic non-protein coding RNA 944 [Source:HGNC Symbol;Acc:HGNC:48640]
401	ENSG00000151422	FER	-0.491726	-0.190715	-3.12717	0.00524175	0.604399	0.378609	6 x 5		5 q21	FER tyrosine kinase [Source:HGNC Symbol;Acc:HGNC:3655]
402	ENSG00000162641	AKNAD1	-0.316383	-0.140959	-3.06088	0.00524242	0.604399	0.378627	22 x 31		1 p13	AKNA domain containing 1 [Source:HGNC Symbol;Acc:HGNC:28398]
403	ENSG00000251363		-0.821241	-0.229488	-3.08625	0.00527594	0.604399	0.379528	26 x 30		14 q21	long intergenic non-protein coding RNA 2315 [Source:HGNC Symbol;Acc:HGNC:53234]
404	ENSG00000018625	ATP1A2	-0.790758	-0.2289	-3.05333	0.00529766	0.604399	0.380108	11 x 1		1 q23	ATPase Na+/K+ transporting subunit alpha 2 [Source:HGNC Symbol;Acc:HGNC:800]
405	ENSG00000162407	PLPP3	-0.560548	-0.204715	-3.08364	0.00529879	0.604399	0.380138	10 x 1		1 p32	phospholipid phosphatase 3 [Source:HGNC Symbol;Acc:HGNC:9229]
406	ENSG00000181444	ZNF467	0.527528	0.381495	3.09715	0.00531153	0.604399	0.380477	15 x 40		7 q36	zinc finger protein 467 [Source:HGNC Symbol;Acc:HGNC:23154]
407	ENSG00000249421	ADAMTS19-AS1	-0.214576	-0.102788	-2.97759	0.00531502	0.604399	0.380569	4 x 35		5 q23	ADAMTS19 antisense RNA 1 [Source:HGNC Symbol;Acc:HGNC:40797]
408	ENSG00000175121	WFDC5	-0.387551	-0.163593	-3.05804	0.00531744	0.604399	0.380633	36 x 15		20 q13	WAP four-disulfide core domain 5 [Source:HGNC Symbol;Acc:HGNC:20477]
409	ENSG00000236540		0.467468	0.328824	3.11404	0.00535541	0.604399	0.381635	12 x 23		22 q11
410	ENSG00000143512	HHIPL2	-0.589173	-0.209621	-3.04768	0.00535772	0.604399	0.381696	30 x 30		1 q41	HHIP like 2 [Source:HGNC Symbol;Acc:HGNC:25842]
411	ENSG00000240567	LINC02067	0.235564	0.147727	3.07002	0.00537273	0.604399	0.382089	14 x 32		3 q26	long intergenic non-protein coding RNA 2067 [Source:HGNC Symbol;Acc:HGNC:52913]
412	ENSG00000133835	HSD17B4	-0.459333	-0.183046	-3.13053	0.00537578	0.604399	0.382169	11 x 37		5 q23	hydroxysteroid 17-beta dehydrogenase 4 [Source:HGNC Symbol;Acc:HGNC:5213]
413	ENSG00000106603	COA1	-0.349574	-0.15193	-3.09677	0.00541721	0.604399	0.383246	21 x 38		7 p13	cytochrome c oxidase assembly factor 1 homolog [Source:HGNC Symbol;Acc:HGNC:21868]
414	ENSG00000187372	PCDHB13	-0.859291	-0.229364	-3.1048	0.00542376	0.604399	0.383416	6 x 4		5 q31	protocadherin beta 13 [Source:HGNC Symbol;Acc:HGNC:8684]
415	ENSG00000272154		-0.327254	-0.144632	-3.07407	0.00551685	0.604399	0.385796	27 x 22		5 q31
416	ENSG00000237037		-0.280449	-0.128265	-3.06793	0.00552976	0.604399	0.386122	9 x 16		22 q13	NDUFA6 antisense RNA 1 (head to head) [Source:HGNC Symbol;Acc:HGNC:45273]
417	ENSG00000280543	ASAP1-IT2	0.480989	0.340474	3.09577	0.00553128	0.604399	0.38616	13 x 25		8 q24	ASAP1 intronic transcript 2 [Source:HGNC Symbol;Acc:HGNC:48917]
418	ENSG00000101440	ASIP	-0.337697	-0.148088	-3.02515	0.00554228	0.604399	0.386437	16 x 11		20 q11	agouti signaling protein [Source:HGNC Symbol;Acc:HGNC:745]
419	ENSG00000134202	GSTM3	-0.625381	-0.215054	-3.04561	0.00556938	0.604399	0.387117	1 x 1		1 p13	glutathione S-transferase mu 3 [Source:HGNC Symbol;Acc:HGNC:4635]
420	ENSG00000161664	ASB16	0.461703	0.323893	3.09763	0.00560291	0.604399	0.387951	4 x 24		17 q21	ankyrin repeat and SOCS box containing 16 [Source:HGNC Symbol;Acc:HGNC:19768]
421	ENSG00000131437	KIF3A	-0.429191	-0.175291	-3.09203	0.00565336	0.604399	0.389195	1 x 18		5 q31	kinesin family member 3A [Source:HGNC Symbol;Acc:HGNC:6319]
422	ENSG00000108244	KRT23	1.13346	1.04564	3.07521	0.00565506	0.604399	0.389237	40 x 12	D	17 q21	keratin 23 [Source:HGNC Symbol;Acc:HGNC:6438]
423	ENSG00000279467		0.527811	0.381748	3.10628	0.00572574	0.604399	0.390955	11 x 20		22 q11
424	ENSG00000267284		-0.704511	-0.223924	-3.06746	0.00572629	0.604399	0.390968	26 x 31		18 q21
425	ENSG00000184209	SNRNP35	-0.302828	-0.136271	-3.05994	0.00575542	0.604399	0.391668	28 x 33		12 q24	small nuclear ribonucleoprotein U11/U12 subunit 35 [Source:HGNC Symbol;Acc:HGNC:30852]
426	ENSG00000131067	GGT7	-0.491302	-0.190619	-3.05924	0.0057688	0.604399	0.391988	4 x 32		20 q11	gamma-glutamyltransferase 7 [Source:HGNC Symbol;Acc:HGNC:4259]
427	ENSG00000146909	NOM1	0.336689	0.222346	3.06581	0.00577826	0.604399	0.392214	27 x 18		7 q36	nucleolar protein with MIF4G domain 1 [Source:HGNC Symbol;Acc:HGNC:13244]
428	ENSG00000253502		-0.294055	-0.133171	-3.05024	0.00580048	0.604399	0.392742	18 x 31		8 q11	ATPase H+ transporting V1 subunit G1 pseudogene 2 [Source:HGNC Symbol;Acc:HGNC:29359]
429	ENSG00000272070		-0.588485	-0.209509	-3.0525	0.00580541	0.604399	0.392859	28 x 23		5 q31
430	ENSG00000167912		-0.788866	-0.228843	-3.06191	0.00581304	0.604399	0.393039	34 x 23	B	8 q12
431	ENSG00000174429	ABRA	-0.240887	-0.113307	-3.049	0.005835	0.604399	0.393557	16 x 30		8 q23	actin binding Rho activating protein [Source:HGNC Symbol;Acc:HGNC:30655]
432	ENSG00000236871	LINC00106	0.772639	0.621057	3.08235	0.00588329	0.604399	0.394688	7 x 26	J	X p22	long intergenic non-protein coding RNA 106 [Source:HGNC Symbol;Acc:HGNC:31843]
433	ENSG00000111361	EIF2B1	-0.33657	-0.147718	-3.06982	0.00591327	0.604399	0.395383	25 x 34		12 q24	eukaryotic translation initiation factor 2B subunit alpha [Source:HGNC Symbol;Acc:HGNC:3257]
434	ENSG00000225213		0.291008	0.187805	3.05715	0.00593549	0.604399	0.395896	14 x 18		10 p13
435	ENSG00000255050		0.436183	0.302328	3.05069	0.00593626	0.604399	0.395913	10 x 25		8 q24
436	ENSG00000260135		0.481808	0.341184	3.02183	0.00597497	0.604399	0.3968	34 x 3	F	16 q12	MMP2 antisense RNA 1 [Source:HGNC Symbol;Acc:HGNC:53142]
437	ENSG00000274419	TBC1D3D	-0.215073	-0.102991	-2.91813	0.00599993	0.604399	0.397368	17 x 15		17 q12	TBC1 domain family member 3D [Source:HGNC Symbol;Acc:HGNC:28944]
438	ENSG00000237076		0.296878	0.192167	3.03708	0.00600184	0.604399	0.397411	15 x 32		1 p31
439	ENSG00000227237		0.261841	0.16647	3.04598	0.00603571	0.604399	0.398176	16 x 17		1 q44
440	ENSG00000186765	FSCN2	0.592984	0.4416	3.05831	0.00603578	0.604399	0.398178	4 x 24		17 q25	fascin actin-bundling protein 2, retinal [Source:HGNC Symbol;Acc:HGNC:3960]
441	ENSG00000163785	RYK	-0.381216	-0.161714	-3.06889	0.00607597	0.604399	0.399079	31 x 19		3 q22	receptor-like tyrosine kinase [Source:HGNC Symbol;Acc:HGNC:10481]
442	ENSG00000152359	POC5	-0.379834	-0.1613	-3.0578	0.00610294	0.604399	0.399679	1 x 17		5 q13	POC5 centriolar protein [Source:HGNC Symbol;Acc:HGNC:26658]
443	ENSG00000131732	ZCCHC9	-0.305961	-0.137365	-3.0255	0.00613787	0.604399	0.400451	22 x 40		5 q14	zinc finger CCHC-type containing 9 [Source:HGNC Symbol;Acc:HGNC:25424]
444	ENSG00000201555		0.171836	0.104159	2.97958	0.00617225	0.604399	0.401205	16 x 25		6 p21	Y RNA [Source:RFAM;Acc:RF00019]
445	ENSG00000242770		-0.181363	-0.0888598	-2.99797	0.00619032	0.604399	0.401599	13 x 11		3 q13
446	ENSG00000153832	FBXO36	-0.702069	-0.223712	-3.06611	0.00621385	0.604399	0.40211	4 x 39		2 q36	F-box protein 36 [Source:HGNC Symbol;Acc:HGNC:27020]
447	ENSG00000106460	TMEM106B	-0.493591	-0.191135	-3.06089	0.00621448	0.604399	0.402123	1 x 15	I	7 p21	transmembrane protein 106B [Source:HGNC Symbol;Acc:HGNC:22407]
448	ENSG00000237773		-0.481216	-0.188302	-3.01873	0.0062381	0.604399	0.402634	31 x 37		7 p21
449	ENSG00000234840	LINC01239	-0.707177	-0.224151	-2.99216	0.00625081	0.604399	0.402907	26 x 31		9 p21	long intergenic non-protein coding RNA 1239 [Source:HGNC Symbol;Acc:HGNC:49796]
450	ENSG00000172869	DMXL1	-0.348712	-0.151654	-3.04413	0.00627376	0.604399	0.403399	1 x 15	I	5 q23	Dmx like 1 [Source:HGNC Symbol;Acc:HGNC:2937]
451	ENSG00000204338		1.17332	1.09779	3.06353	0.00627932	0.604399	0.403518	10 x 40	K	6 p21	cytochrome P450 family 21 subfamily A member 1, pseudogene [Source:HGNC Symbol;Acc:HGNC:2599]
452	ENSG00000241489		0.594458	0.442986	3.03227	0.00631488	0.604399	0.404274	6 x 26		X q28
453	ENSG00000113327	GABRG2	-0.744334	-0.22683	-3.00513	0.00636389	0.604399	0.405308	26 x 31		5 q34	gamma-aminobutyric acid type A receptor gamma2 subunit [Source:HGNC Symbol;Acc:HGNC:4087]
454	ENSG00000184508	HDDC3	0.541209	0.393824	3.03869	0.00639476	0.604399	0.405953	40 x 38		15 q26	HD domain containing 3 [Source:HGNC Symbol;Acc:HGNC:30522]
455	ENSG00000255182		0.546837	0.398932	3.01238	0.00639741	0.604399	0.406009	7 x 26	J	8 q24
456	ENSG00000130021	PUDP	0.549965	0.40178	3.03144	0.00643464	0.604399	0.406781	31 x 13		X p22	pseudouridine 5'-phosphatase [Source:HGNC Symbol;Acc:HGNC:16818]
457	ENSG00000238039		0.498262	0.355533	3.02191	0.00643468	0.604399	0.406782	7 x 27	J	X q28
458	ENSG00000008405	CRY1	-0.362978	-0.156155	-3.01948	0.00643751	0.604399	0.406841	29 x 19		12 q23	cryptochrome circadian clock 1 [Source:HGNC Symbol;Acc:HGNC:2384]
459	ENSG00000228274		-0.595376	-0.210613	-3.04445	0.00643913	0.604399	0.406874	6 x 31		22 q13
460	ENSG00000172901	LVRN	-0.297895	-0.134534	-2.9655	0.00645883	0.604399	0.40728	15 x 6		5 q23	laeverin [Source:HGNC Symbol;Acc:HGNC:26904]
461	ENSG00000256564		-0.313758	-0.140061	-2.97647	0.00655152	0.604399	0.409168	30 x 21		12 p12
462	ENSG00000169885	CALML6	0.614816	0.462275	3.03046	0.00657363	0.604399	0.409613	7 x 27	J	1 p36	calmodulin like 6 [Source:HGNC Symbol;Acc:HGNC:24193]
463	ENSG00000186474	KLK12	0.793808	0.643602	3.03357	0.00659532	0.604399	0.410048	15 x 21		19 q13	kallikrein related peptidase 12 [Source:HGNC Symbol;Acc:HGNC:6360]
464	ENSG00000213731		0.365264	0.24465	3.01879	0.00659857	0.604399	0.410113	13 x 21		10 q22	RAB5C, member RAS oncogene family pseudogene 1 [Source:HGNC Symbol;Acc:HGNC:45104]
465	ENSG00000212283	SNORD89	-0.334718	-0.147109	-2.95005	0.00665007	0.604399	0.411136	16 x 30		2 q11	small nucleolar RNA, C/D box 89 [Source:HGNC Symbol;Acc:HGNC:32750]
466	ENSG00000236276		-0.181778	-0.0890382	-2.90518	0.00665775	0.604399	0.411288	16 x 35		X p11	NDP antisense RNA 1 [Source:HGNC Symbol;Acc:HGNC:40395]
467	ENSG00000257869		-0.899766	-0.228186	-3.01649	0.0066658	0.604399	0.411447	26 x 31		14 q12
468	ENSG00000268080		-0.794382	-0.229002	-2.99388	0.00668258	0.604399	0.411777	24 x 31		8 q22
469	ENSG00000281344		-0.558783	-0.204395	-2.99469	0.00668443	0.604399	0.411813	26 x 31		12 q23	HELLP associated long non-coding RNA [Source:HGNC Symbol;Acc:HGNC:43984]
470	ENSG00000251165	F11-AS1	-0.470858	-0.185854	-2.95547	0.00670582	0.604399	0.412232	31 x 22	B	4 q35	F11 antisense RNA 1 [Source:HGNC Symbol;Acc:HGNC:27725]
471	ENSG00000255649		-0.172462	-0.0850037	-2.95126	0.00674655	0.604399	0.413025	14 x 14		12 p13
472	ENSG00000170236	USP50	0.198911	0.122343	2.97885	0.00681467	0.604399	0.414336	13 x 14		15 q21	ubiquitin specific peptidase 50 [Source:HGNC Symbol;Acc:HGNC:20079]
473	ENSG00000148444	COMMD3	-0.334857	-0.147155	-2.95552	0.0068511	0.604399	0.41503	21 x 40		10 p12	COMM domain containing 3 [Source:HGNC Symbol;Acc:HGNC:23332]
474	ENSG00000236577		0.239052	0.150189	2.98398	0.00686409	0.604399	0.415276	10 x 17		13 q14	small nuclear ribonucleoprotein polypeptide G pseudogene 14 [Source:HGNC Symbol;Acc:HGNC:42039]
475	ENSG00000258727	LOC102724814	0.555198	0.406559	2.99293	0.00689396	0.604399	0.41584	7 x 26	J	14 q11
476	ENSG00000231453	LINC01305	-0.218151	-0.104244	-2.87509	0.00691659	0.604399	0.416265	14 x 11		2 q31	long intergenic non-protein coding RNA 1305 [Source:HGNC Symbol;Acc:HGNC:27690]
477	ENSG00000176204	LRRTM4	-0.829188	-0.22954	-2.96937	0.00694111	0.604399	0.416723	25 x 28		2 p12	leucine rich repeat transmembrane neuronal 4 [Source:HGNC Symbol;Acc:HGNC:19411]
478	ENSG00000272328		-0.566134	-0.205715	-2.98349	0.00695928	0.604399	0.417061	26 x 31		7 p21
479	ENSG00000154175	ABI3BP	-1.06502	-0.212194	-2.99307	0.00696957	0.604399	0.417252	13 x 1		3 q12	ABI family member 3 binding protein [Source:HGNC Symbol;Acc:HGNC:17265]
480	ENSG00000183654	2020-03-11	-0.502536	-0.19312	-2.92085	0.00698665	0.604399	0.417569	26 x 29		5 p15	membrane associated ring-CH-type finger 11 [Source:HGNC Symbol;Acc:HGNC:33609]
481	ENSG00000182508	LHFPL1	-0.412894	-0.170848	-2.94903	0.00700142	0.604399	0.417841	26 x 28		X q23	LHFPL tetraspan subfamily member 1 [Source:HGNC Symbol;Acc:HGNC:6587]
482	ENSG00000215785		0.332334	0.218993	3.00096	0.00706528	0.604399	0.41901	11 x 32		1 p36	cofilin 1 pseudogene 6 [Source:HGNC Symbol;Acc:HGNC:34545]
483	ENSG00000164953	TMEM67	-0.53649	-0.200176	-2.99771	0.00706808	0.604399	0.419061	1 x 31		8 q22	transmembrane protein 67 [Source:HGNC Symbol;Acc:HGNC:28396]
484	ENSG00000255920		-0.248254	-0.11617	-2.91072	0.00707989	0.604399	0.419275	12 x 9		12 p13	CCND2 antisense RNA 2 [Source:HGNC Symbol;Acc:HGNC:49399]
485	ENSG00000271369		-0.25545	-0.118933	-2.8402	0.00708247	0.604399	0.419322	23 x 31		11 p13
486	ENSG00000270157		0.420506	0.289293	2.98694	0.00712105	0.604399	0.420019	8 x 19		7 q34
487	ENSG00000160349	LCN1	-0.62947	-0.215613	-2.88413	0.00712628	0.604399	0.420113	27 x 34		9 q34	lipocalin 1 [Source:HGNC Symbol;Acc:HGNC:6525]
488	ENSG00000259645		0.234682	0.147106	2.94166	0.00714547	0.604399	0.420457	17 x 9		15 q23
489	ENSG00000182583	VCX	-0.557027	-0.204075	-2.95942	0.00715831	0.604399	0.420687	26 x 31		X p22	variable charge, X-linked [Source:HGNC Symbol;Acc:HGNC:12667]
490	ENSG00000161973	CCDC42	-0.375267	-0.159925	-2.95712	0.00715931	0.604399	0.420705	21 x 29		17 p13	coiled-coil domain containing 42 [Source:HGNC Symbol;Acc:HGNC:26528]
491	ENSG00000112175	BMP5	-0.370173	-0.158374	-2.9146	0.00717304	0.604399	0.42095	14 x 7		6 p12	bone morphogenetic protein 5 [Source:HGNC Symbol;Acc:HGNC:1072]
492	ENSG00000133488	SEC14L4	-0.619023	-0.214162	-2.92145	0.00718296	0.604399	0.421126	40 x 21	C	22 q12	SEC14 like lipid binding 4 [Source:HGNC Symbol;Acc:HGNC:20627]
493	ENSG00000198580		-0.460155	-0.183249	-2.97983	0.00719903	0.604399	0.421411	27 x 22		7 p22
494	ENSG00000006576	PHTF2	-0.328606	-0.145084	-2.9665	0.0072148	0.604399	0.421691	29 x 16		7 q11	putative homeodomain transcription factor 2 [Source:HGNC Symbol;Acc:HGNC:13411]
495	ENSG00000272589	ZSWIM8-AS1	0.264477	0.168374	2.96635	0.0072563	0.604399	0.422421	14 x 23		10 q22	ZSWIM8 antisense RNA 1 [Source:HGNC Symbol;Acc:HGNC:45103]
496	ENSG00000146576	C7orf26	-0.433291	-0.176381	-2.99263	0.00727358	0.604399	0.422723	20 x 19		7 p22	chromosome 7 open reading frame 26 [Source:HGNC Symbol;Acc:HGNC:21702]
497	ENSG00000156218	ADAMTSL3	0.772383	0.620787	2.9589	0.00729809	0.604399	0.42315	22 x 5		15 q25	ADAMTS like 3 [Source:HGNC Symbol;Acc:HGNC:14633]
498	ENSG00000236432		-0.269331	-0.124165	-2.93874	0.00732385	0.604399	0.423597	21 x 29		2 q36
499	ENSG00000228727	SAPCD1	0.378258	0.25497	2.94132	0.00732999	0.604399	0.423703	9 x 27		6 p21	suppressor APC domain containing 1 [Source:HGNC Symbol;Acc:HGNC:13938]
500	ENSG00000275888		0.514766	0.370104	2.97592	0.00733655	0.604399	0.423817	8 x 25	J	17 q25
501	ENSG00000196550	FAM72C	0.351307	0.233689	2.9372	0.00734491	0.604399	0.423961	40 x 26	A	1 q32	family with sequence similarity 72 member A [Source:HGNC Symbol;Acc:HGNC:24044]
502	ENSG00000258986	TMEM179	0.941223	0.80877	2.98445	0.00737034	0.604399	0.424398	30 x 27		14 q32	transmembrane protein 179 [Source:HGNC Symbol;Acc:HGNC:20137]
503	ENSG00000249637		-0.269772	-0.124329	-2.94076	0.00737292	0.604399	0.424442	29 x 34		5 q31
504	ENSG00000089847	ANKRD24	0.689112	0.534981	2.98083	0.00740198	0.604399	0.424939	5 x 27		19 p13	ankyrin repeat domain 24 [Source:HGNC Symbol;Acc:HGNC:29424]
505	ENSG00000164338	UTP15	-0.321115	-0.142568	-2.95997	0.00741894	0.604399	0.425228	1 x 15	I	5 q13	UTP15, small subunit processome component [Source:HGNC Symbol;Acc:HGNC:25758]
506	ENSG00000275389		-0.286185	-0.130348	-2.94154	0.00743679	0.604399	0.42553	21 x 32		12 q24
507	ENSG00000188403		-0.279502	-0.127919	-2.89276	0.00743951	0.604399	0.425576	35 x 6		15 q11	immunoglobulin heavy variable 1/OR15-9 (non-functional) [Source:HGNC Symbol;Acc:HGNC:5569]
508	ENSG00000251400		-0.336619	-0.147734	-2.96138	0.00743959	0.604399	0.425578	25 x 38		5 q13	aldehyde dehydrogenase 7 family member A1 pseudogene 1 [Source:HGNC Symbol;Acc:HGNC:878]
509	ENSG00000199568	RNU5A-1	-0.297611	-0.134434	-2.9398	0.00746111	0.604399	0.425941	28 x 35		15 q22	RNA, U5A small nuclear 1 [Source:HGNC Symbol;Acc:HGNC:10211]
510	ENSG00000273419		0.365939	0.245183	2.96192	0.00746585	0.604399	0.426021	16 x 20		7 q36
511	ENSG00000237188		-0.38268	-0.16215	-2.96037	0.00746872	0.604399	0.426069	2 x 20		1 q21
512	ENSG00000263639	MSMB	-0.274268	-0.125996	-2.8696	0.00755967	0.604399	0.427587	9 x 38	K	10 q11	microseminoprotein beta [Source:HGNC Symbol;Acc:HGNC:7372]
513	ENSG00000166349	RAG1	-0.442244	-0.178723	-2.93212	0.00758623	0.604399	0.428026	24 x 28		11 p12	recombination activating 1 [Source:HGNC Symbol;Acc:HGNC:9831]
514	ENSG00000254233		-0.302846	-0.136277	-2.85356	0.00758739	0.604399	0.428045	24 x 32		4 q35	long intergenic non-protein coding RNA 2365 [Source:HGNC Symbol;Acc:HGNC:53285]
515	ENSG00000266994		0.147776	0.0884053	2.85925	0.00769026	0.604399	0.429722	10 x 15		16 p13
516	ENSG00000122507	BBS9	-0.414191	-0.171208	-2.96185	0.00771074	0.604399	0.430052	10 x 11		7 p14	Bardet-Biedl syndrome 9 [Source:HGNC Symbol;Acc:HGNC:30000]
517	ENSG00000245149	RNF139-AS1	0.544419	0.396735	2.94122	0.00772156	0.604399	0.430226	9 x 27		8 q24	RNF139 antisense RNA 1 (head to head) [Source:HGNC Symbol;Acc:HGNC:48940]
518	ENSG00000158482		0.269913	0.172318	2.94565	0.00772997	0.604399	0.430361	10 x 12		16 p12	sorting nexin 29 pseudogene 1 [Source:HGNC Symbol;Acc:HGNC:31913]
519	ENSG00000080293	SCTR	-0.318917	-0.141822	-2.836	0.00774759	0.604399	0.430643	25 x 28		2 q14	secretin receptor [Source:HGNC Symbol;Acc:HGNC:10608]
520	ENSG00000188738	FSIP2	-0.528047	-0.198492	-2.9167	0.00777834	0.604399	0.431133	4 x 20		2 q32	fibrous sheath interacting protein 2 [Source:HGNC Symbol;Acc:HGNC:21675]
521	ENSG00000225138		0.618508	0.465802	2.89557	0.00783241	0.604399	0.431988	7 x 27	J	5 p15	SLC9A3 antisense RNA 1 [Source:HGNC Symbol;Acc:HGNC:40550]
522	ENSG00000198483	ANKRD35	-0.616414	-0.213789	-2.92669	0.00786198	0.604399	0.432452	11 x 2		1 q21	ankyrin repeat domain 35 [Source:HGNC Symbol;Acc:HGNC:26323]
523	ENSG00000134970	TMED7	-0.304265	-0.136773	-2.92655	0.00787199	0.604399	0.432608	1 x 14	I	5 q22	transmembrane p24 trafficking protein 7 [Source:HGNC Symbol;Acc:HGNC:24253]
524	ENSG00000267749		0.30444	0.197819	2.94363	0.00787877	0.604399	0.432714	13 x 20		19 p13
525	ENSG00000099899	TRMT2A	0.311727	0.203301	2.9126	0.00792475	0.604399	0.433429	32 x 35		22 q11	tRNA methyltransferase 2 homolog A [Source:HGNC Symbol;Acc:HGNC:24974]
526	ENSG00000105409	ATP1A3	1.1969	1.12914	2.92411	0.00792957	0.604399	0.433503	23 x 13		19 q13	ATPase Na+/K+ transporting subunit alpha 3 [Source:HGNC Symbol;Acc:HGNC:801]
527	ENSG00000279789		0.524094	0.378419	2.94242	0.00794104	0.604399	0.43368	7 x 26	J	16 p11
528	ENSG00000185015	CA13	-0.436753	-0.177293	-2.91957	0.0079819	0.604399	0.434308	38 x 16		8 q21	carbonic anhydrase 13 [Source:HGNC Symbol;Acc:HGNC:14914]
529	ENSG00000228323		0.397633	0.270565	2.93012	0.00801666	0.604399	0.434839	14 x 19		19 q13
530	ENSG00000145642	FAM159B	-0.230694	-0.109286	-2.87945	0.0080204	0.604399	0.434896	23 x 31		5 q12	family with sequence similarity 159 member B [Source:HGNC Symbol;Acc:HGNC:34236]
531	ENSG00000198848	CES1	-0.827529	-0.229533	-2.90783	0.00805215	0.604399	0.435377	16 x 1	G	16 q12	carboxylesterase 1 [Source:HGNC Symbol;Acc:HGNC:1863]
532	ENSG00000171988	JMJD1C	-0.381146	-0.161693	-2.92593	0.00806576	0.604399	0.435583	8 x 6		10 q21	jumonji domain containing 1C [Source:HGNC Symbol;Acc:HGNC:12313]
533	ENSG00000241388	HNF1A-AS1	-0.310821	-0.13905	-2.7911	0.00807239	0.604399	0.435683	22 x 32		12 q24	HNF1A antisense RNA 1 [Source:HGNC Symbol;Acc:HGNC:26785]
534	ENSG00000205302	SNX2	-0.281146	-0.128519	-2.91064	0.00807795	0.604399	0.435766	28 x 10		5 q23	sorting nexin 2 [Source:HGNC Symbol;Acc:HGNC:11173]
535	ENSG00000106546	AHR	-0.588266	-0.209474	-2.93243	0.00807801	0.604399	0.435767	28 x 6		7 p21	aryl hydrocarbon receptor [Source:HGNC Symbol;Acc:HGNC:348]
536	ENSG00000200959	SNORA74A	-0.268875	-0.123996	-2.89282	0.0080967	0.604399	0.436048	16 x 30		5 q31	small nucleolar RNA, H/ACA box 74A [Source:HGNC Symbol;Acc:HGNC:10119]
537	ENSG00000182979	MTA1	0.422487	0.290932	2.93151	0.0081005	0.604399	0.436105	19 x 18		14 q32	metastasis associated 1 [Source:HGNC Symbol;Acc:HGNC:7410]
538	ENSG00000272370		-0.29282	-0.132731	-2.91545	0.00811065	0.604399	0.436257	14 x 33		5 q12
539	ENSG00000109107	ALDOC	-0.835106	-0.229553	-2.913	0.00815307	0.604399	0.436889	21 x 21		17 q11	aldolase, fructose-bisphosphate C [Source:HGNC Symbol;Acc:HGNC:418]
540	ENSG00000278126		-0.323669	-0.14343	-2.90551	0.00816078	0.604399	0.437004	17 x 29		12 q13
541	ENSG00000259447		-0.1559	-0.0776898	-2.87734	0.00818851	0.604399	0.437414	9 x 34		15 q14
542	ENSG00000088827	SIGLEC1	0.787253	0.636589	2.90744	0.00820704	0.604399	0.437687	34 x 1	F	20 p13	sialic acid binding Ig like lectin 1 [Source:HGNC Symbol;Acc:HGNC:11127]
543	ENSG00000145725	PPIP5K2	-0.318892	-0.141814	-2.90968	0.00823052	0.604399	0.438032	1 x 15	I	5 q21	diphosphoinositol pentakisphosphate kinase 2 [Source:HGNC Symbol;Acc:HGNC:29035]
544	ENSG00000227051	C14orf132	-0.721963	-0.225326	-2.89419	0.00823979	0.604399	0.438168	5 x 1		14 q32	chromosome 14 open reading frame 132 [Source:HGNC Symbol;Acc:HGNC:20346]
545	ENSG00000221845		0.44327	0.308274	2.92242	0.00824673	0.604399	0.438269	17 x 34		7 p12	chromosome 7 open reading frame 65 [Source:HGNC Symbol;Acc:HGNC:34432]
546	ENSG00000211952		-0.589948	-0.209746	-2.82974	0.00826927	0.604399	0.438598	40 x 1	E	14 q32	immunoglobulin heavy variable 4-28 [Source:HGNC Symbol;Acc:HGNC:5645]
547	ENSG00000189238		-0.392579	-0.165066	-2.89382	0.00827201	0.604399	0.438638	35 x 9		12 q24	long intergenic non-protein coding RNA 943 [Source:HGNC Symbol;Acc:HGNC:48639]
548	ENSG00000197976	AKAP17A	0.436496	0.30259	2.92232	0.00829081	0.604399	0.43891	17 x 18		X p22	A-kinase anchoring protein 17A [Source:HGNC Symbol;Acc:HGNC:18783]
549	ENSG00000127993	RBM48	-0.194177	-0.0943192	-2.85396	0.0083063	0.604399	0.439135	31 x 17		7 q21	RNA binding motif protein 48 [Source:HGNC Symbol;Acc:HGNC:21785]
550	ENSG00000241547		0.288608	0.186028	2.92403	0.00832004	0.604399	0.439333	24 x 36		1 p36	actin gamma 1 pseudogene 20 [Source:HGNC Symbol;Acc:HGNC:51500]
551	ENSG00000179094	PER1	-0.396907	-0.166321	-2.86627	0.00832293	0.604399	0.439375	13 x 6		17 p13	period circadian clock 1 [Source:HGNC Symbol;Acc:HGNC:8845]
552	ENSG00000198846	TOX	-0.728277	-0.225784	-2.8788	0.00833117	0.604399	0.439493	33 x 23	B	8 q12	thymocyte selection associated high mobility group box [Source:HGNC Symbol;Acc:HGNC:18988]
553	ENSG00000010539	ZNF200	-0.279441	-0.127897	-2.90816	0.00833697	0.604399	0.439577	28 x 17		16 p13	zinc finger protein 200 [Source:HGNC Symbol;Acc:HGNC:12993]
554	ENSG00000182050	MGAT4C	-0.2707	-0.124674	-2.82426	0.00835623	0.604399	0.439853	24 x 31		12 q21	MGAT4 family member C [Source:HGNC Symbol;Acc:HGNC:30871]
555	ENSG00000267080	ASB16-AS1	0.444038	0.30892	2.93293	0.00838608	0.604399	0.44028	9 x 32		17 q21	ASB16 antisense RNA 1 [Source:HGNC Symbol;Acc:HGNC:25442]
556	ENSG00000228413		0.210761	0.130452	2.88917	0.00839648	0.604399	0.440428	16 x 18		3 q29
557	ENSG00000104064	GABPB1	-0.235712	-0.111273	-2.90338	0.0084107	0.604399	0.44063	21 x 36		15 q21	GA binding protein transcription factor beta subunit 1 [Source:HGNC Symbol;Acc:HGNC:4074]
558	ENSG00000269896	LOC100129534	0.628922	0.475799	2.91602	0.00842462	0.604399	0.440828	4 x 27		1 p36
559	ENSG00000197479	PCDHB11	-1.32514	-0.150617	-2.9254	0.00843796	0.604399	0.441016	7 x 1		5 q31	protocadherin beta 11 [Source:HGNC Symbol;Acc:HGNC:8682]
560	ENSG00000196139	AKR1C3	-0.914253	-0.227503	-2.90346	0.00844492	0.604399	0.441115	23 x 28		10 p15	aldo-keto reductase family 1 member C3 [Source:HGNC Symbol;Acc:HGNC:386]
561	ENSG00000132837	DMGDH	-0.531093	-0.199105	-2.90977	0.00845496	0.604399	0.441256	22 x 27		5 q14	dimethylglycine dehydrogenase [Source:HGNC Symbol;Acc:HGNC:24475]
562	ENSG00000225098		-0.17567	-0.0863993	-2.89734	0.00847422	0.604399	0.441527	16 x 13		22 q11	breakpoint cluster region pseudogene 1 [Source:HGNC Symbol;Acc:HGNC:39073]
563	ENSG00000168748	CA7	-0.285299	-0.130028	-2.84916	0.00848829	0.604399	0.441724	20 x 33		16 q22	carbonic anhydrase 7 [Source:HGNC Symbol;Acc:HGNC:1381]
564	ENSG00000273428		0.250557	0.158365	2.84864	0.0084999	0.604399	0.441887	16 x 24		22 q12
565	ENSG00000140993	TIGD7	-0.337034	-0.14787	-2.89452	0.00850208	0.604399	0.441917	22 x 31		16 p13	tigger transposable element derived 7 [Source:HGNC Symbol;Acc:HGNC:18331]
566	ENSG00000255663		0.193581	0.118725	2.89036	0.00850769	0.623629	0.441995	15 x 14		11 q23
567	ENSG00000166825	ANPEP	1.14293	1.05793	2.90252	0.00852889	0.62699	0.442316	30 x 1	F	15 q26	alanyl aminopeptidase, membrane [Source:HGNC Symbol;Acc:HGNC:500]
568	ENSG00000204655	MOG	-0.190575	-0.0927955	-2.85124	0.00857576	0.62699	0.443029	36 x 19		6 p22	myelin oligodendrocyte glycoprotein [Source:HGNC Symbol;Acc:HGNC:7197]
569	ENSG00000236583		0.209365	0.129492	2.90306	0.00860092	0.62699	0.443409	15 x 17		8 q22
570	ENSG00000172867	KRT2	-0.168408	-0.08323	-2.78743	0.00862335	0.62699	0.443747	35 x 17		12 q13	keratin 2 [Source:HGNC Symbol;Acc:HGNC:6439]
571	ENSG00000253250	C8orf88	-0.598673	-0.21113	-2.88443	0.00867386	0.62699	0.444504	15 x 5		8 q21	chromosome 8 open reading frame 88 [Source:HGNC Symbol;Acc:HGNC:44672]
572	ENSG00000137766	UNC13C	-0.376098	-0.160176	-2.88248	0.00867738	0.62699	0.444556	13 x 7		15 q21	unc-13 homolog C [Source:HGNC Symbol;Acc:HGNC:23149]
573	ENSG00000185418	TARSL2	0.383024	0.258784	2.88701	0.00869482	0.62699	0.444816	11 x 11		15 q26	threonyl-tRNA synthetase like 2 [Source:HGNC Symbol;Acc:HGNC:24728]
574	ENSG00000166845	C18orf54	-0.418124	-0.172293	-2.8812	0.00874013	0.62699	0.445487	37 x 26	A	18 q21	chromosome 18 open reading frame 54 [Source:HGNC Symbol;Acc:HGNC:13796]
575	ENSG00000145332	KLHL8	-0.245377	-0.115056	-2.84272	0.00874859	0.62699	0.445612	2 x 14	I	4 q22	kelch like family member 8 [Source:HGNC Symbol;Acc:HGNC:18644]
576	ENSG00000125454	SLC25A19	0.416576	0.286051	2.89099	0.00875695	0.62699	0.445735	40 x 33	A	17 q25	solute carrier family 25 member 19 [Source:HGNC Symbol;Acc:HGNC:14409]
577	ENSG00000221887	HMSD	-0.481478	-0.188363	-2.83924	0.00875935	0.62699	0.44577	34 x 23	B	18 q22	histocompatibility minor serpin domain containing [Source:HGNC Symbol;Acc:HGNC:23037]
578	ENSG00000119048	UBE2B	-0.389063	-0.164038	-2.89712	0.00880765	0.62699	0.446478	21 x 40		5 q31	ubiquitin conjugating enzyme E2 B [Source:HGNC Symbol;Acc:HGNC:12473]
579	ENSG00000118322	ATP10B	1.10106	1.00401	2.88704	0.00888892	0.62699	0.447656	40 x 11	D	5 q34	ATPase phospholipid transporting 10B (putative) [Source:HGNC Symbol;Acc:HGNC:13543]
580	ENSG00000164347	GFM2	-0.429245	-0.175305	-2.88932	0.00890172	0.62699	0.44784	1 x 15	I	5 q13	G elongation factor mitochondrial 2 [Source:HGNC Symbol;Acc:HGNC:29682]
581	ENSG00000113212	PCDHB7	-0.958876	-0.22453	-2.88618	0.008948	0.62699	0.448503	7 x 3		5 q31	protocadherin beta 7 [Source:HGNC Symbol;Acc:HGNC:8692]
582	ENSG00000188647	PTAR1	0.396844	0.269925	2.893	0.00896732	0.62699	0.448779	5 x 13		9 q21	protein prenyltransferase alpha subunit repeat containing 1 [Source:HGNC Symbol;Acc:HGNC:30449]
583	ENSG00000234919	LINC01827	-0.334253	-0.146956	-2.80555	0.00899346	0.62699	0.449149	22 x 30		2 q32	long intergenic non-protein coding RNA 1827 [Source:HGNC Symbol;Acc:HGNC:52633]
584	ENSG00000068650	ATP11A	0.492171	0.3502	2.83519	0.00900327	0.62699	0.449288	40 x 16	C	13 q34	ATPase phospholipid transporting 11A [Source:HGNC Symbol;Acc:HGNC:13552]
585	ENSG00000246022	ALDH1L1-AS2	-0.287661	-0.130881	-2.83606	0.00901166	0.62699	0.449407	11 x 2		3 q21	ALDH1L1 antisense RNA 2 [Source:HGNC Symbol;Acc:HGNC:42446]
586	ENSG00000231120		-0.352091	-0.152732	-2.86427	0.00907131	0.62699	0.450245	25 x 40		6 q25	basic transcription factor 3 pseudogene 10 [Source:HGNC Symbol;Acc:HGNC:38570]
587	ENSG00000227992		0.263272	0.167503	2.85645	0.00907402	0.62699	0.450283	22 x 7		2 q13
588	ENSG00000250508	LOC105369364	-0.393088	-0.165214	-2.8293	0.00908627	0.62699	0.450455	24 x 31		11 q13
589	ENSG00000233539	LOC730338	-0.37257	-0.159106	-2.84812	0.0090906	0.62699	0.450515	34 x 18		7 p12
590	ENSG00000100711	ZFYVE21	0.382203	0.258126	2.88462	0.0090909	0.62699	0.450519	17 x 38		14 q32	zinc finger FYVE-type containing 21 [Source:HGNC Symbol;Acc:HGNC:20760]
591	ENSG00000079263	SP140	0.534674	0.387919	2.85277	0.00910811	0.62699	0.450759	40 x 4	E	2 q37	SP140 nuclear body protein [Source:HGNC Symbol;Acc:HGNC:17133]
592	ENSG00000169035	KLK7	0.861983	0.718209	2.85501	0.00913829	0.62699	0.451178	40 x 12	D	19 q13	kallikrein related peptidase 7 [Source:HGNC Symbol;Acc:HGNC:6368]
593	ENSG00000223561	LOC646588	-0.374972	-0.159835	-2.8496	0.00926167	0.62699	0.452869	24 x 27		7 p15
594	ENSG00000269959	SPACA6P-AS	0.55447	0.405893	2.87948	0.00926391	0.62699	0.4529	9 x 23		19 q13	SPACA6P antisense RNA [Source:HGNC Symbol;Acc:HGNC:49383]
595	ENSG00000168778	TCTN2	-0.566057	-0.205701	-2.87808	0.00926638	0.62699	0.452933	3 x 37		12 q24	tectonic family member 2 [Source:HGNC Symbol;Acc:HGNC:25774]
596	ENSG00000107485	GATA3	0.676799	0.52268	2.84264	0.00928549	0.62699	0.453192	13 x 40		10 p14	GATA binding protein 3 [Source:HGNC Symbol;Acc:HGNC:4172]
597	ENSG00000229970		-0.628874	-0.215532	-2.85309	0.00928691	0.62699	0.453211	26 x 31		7 p21
598	ENSG00000131584	ACAP3	0.452812	0.316332	2.85839	0.00930365	0.62699	0.453438	19 x 17		1 p36	ArfGAP with coiled-coil, ankyrin repeat and PH domains 3 [Source:HGNC Symbol;Acc:HGNC:16754]
599	ENSG00000185668	POU3F1	-0.308476	-0.138239	-2.79226	0.00931495	0.62699	0.45359	15 x 10		1 p34	POU class 3 homeobox 1 [Source:HGNC Symbol;Acc:HGNC:9214]
600	ENSG00000177839	PCDHB9	-0.969087	-0.223665	-2.87485	0.00931856	0.62699	0.453638	32 x 23	B	5 q31	protocadherin beta 9 [Source:HGNC Symbol;Acc:HGNC:8694]
601	ENSG00000258644	SYNJ2BP-COX16	-0.256593	-0.119368	-2.8685	0.00932254	0.62699	0.453692	21 x 35		14 q24	SYNJ2BP-COX16 readthrough [Source:HGNC Symbol;Acc:HGNC:48350]
602	ENSG00000146453	PNLDC1	-0.505642	-0.193797	-2.77955	0.00933526	0.62699	0.453863	21 x 27		6 q25	PARN like, ribonuclease domain containing 1 [Source:HGNC Symbol;Acc:HGNC:21185]
603	ENSG00000146013	GFRA3	-0.662354	-0.219711	-2.8322	0.00934657	0.62699	0.454015	33 x 25	B	5 q31	GDNF family receptor alpha 3 [Source:HGNC Symbol;Acc:HGNC:4245]
604	ENSG00000105866	SP4	-0.47642	-0.187177	-2.87256	0.00937305	0.62699	0.454369	4 x 16		7 p15	Sp4 transcription factor [Source:HGNC Symbol;Acc:HGNC:11209]
605	ENSG00000167393	PPP2R3B	0.487225	0.345888	2.85804	0.00940555	0.62699	0.454801	32 x 32		X p22	protein phosphatase 2 regulatory subunit B''beta [Source:HGNC Symbol;Acc:HGNC:13417]
606	ENSG00000202461		0.212261	0.131486	2.83301	0.00946728	0.62699	0.455617	9 x 18		1 p36	Y RNA [Source:RFAM;Acc:RF00019]
607	ENSG00000272732		-0.391169	-0.164655	-2.85311	0.00947888	0.62699	0.45577	10 x 34		7 p21
608	ENSG00000198961	PJA2	-0.377401	-0.160569	-2.86895	0.00947907	0.62699	0.455772	1 x 15	I	5 q21	praja ring finger ubiquitin ligase 2 [Source:HGNC Symbol;Acc:HGNC:17481]
609	ENSG00000056558	TRAF1	0.522586	0.37707	2.85913	0.00958182	0.62699	0.457111	36 x 5		9 q33	TNF receptor associated factor 1 [Source:HGNC Symbol;Acc:HGNC:12031]
610	ENSG00000232006		-1.17783	-0.190957	-2.86639	0.00959473	0.62699	0.457278	26 x 29		7 p14
611	ENSG00000136247	ZDHHC4	-0.432276	-0.176112	-2.86351	0.00961659	0.62699	0.457559	19 x 37		7 p22	zinc finger DHHC-type containing 4 [Source:HGNC Symbol;Acc:HGNC:18471]
612	ENSG00000071991	CDH19	-0.551007	-0.20296	-2.80122	0.00961948	0.62699	0.457596	34 x 23	B	18 q22	cadherin 19 [Source:HGNC Symbol;Acc:HGNC:1758]
613	ENSG00000252743		0.218257	0.13563	2.78287	0.0096305	0.62699	0.457738	8 x 23		6 p21	RNA, U6 small nuclear 850, pseudogene [Source:HGNC Symbol;Acc:HGNC:47813]
614	ENSG00000253971		0.288035	0.185604	2.83731	0.00963782	0.62699	0.457832	15 x 19		8 q24	cell division cycle 42 pseudogene 3 [Source:HGNC Symbol;Acc:HGNC:44427]
615	ENSG00000163501	IHH	-0.464737	-0.184374	-2.75074	0.00965541	0.62699	0.458057	22 x 31		2 q35	indian hedgehog [Source:HGNC Symbol;Acc:HGNC:5956]
616	ENSG00000109272	PF4V1	-0.304069	-0.136705	-2.7965	0.00965651	0.62699	0.458071	35 x 17		4 q13	platelet factor 4 variant 1 [Source:HGNC Symbol;Acc:HGNC:8862]
617	ENSG00000274295		-0.28502	-0.129927	-2.74944	0.00974556	0.62699	0.459201	22 x 28		8 q11
618	ENSG00000270372		-1.09353	-0.207616	-2.83391	0.00975014	0.62699	0.459259	26 x 31		9 p23
619	ENSG00000235651		0.282991	0.181885	2.84722	0.00976686	0.62699	0.459469	26 x 18		2 q21
620	ENSG00000273311	DGCR11	0.298008	0.193009	2.80935	0.00978728	0.62699	0.459726	25 x 11		22 q11	DiGeorge syndrome critical region gene 11 (non-protein coding) [Source:NCBI gene;Acc:25786]
621	ENSG00000249631		-0.24487	-0.114859	-2.81605	0.00979125	0.62699	0.459775	22 x 31		4 p15
622	ENSG00000272161		0.321896	0.21101	2.83305	0.00981425	0.62699	0.460063	4 x 28		1 p36
623	ENSG00000235328		0.255517	0.161917	2.84754	0.00984553	0.62699	0.460452	9 x 17		22 q11
624	ENSG00000244731	C4A	1.13471	1.04726	2.83917	0.00984931	0.62699	0.460499	11 x 40	K	6 p21	complement C4A (Rodgers blood group) [Source:HGNC Symbol;Acc:HGNC:1323]
625	ENSG00000136238	RAC1	-0.338745	-0.14843	-2.84686	0.00986335	0.62699	0.460674	33 x 14		7 p22	ras-related C3 botulinum toxin substrate 1 (rho family, small GTP binding protein Rac1) [Source:HGNC Symbol;Acc:HGNC:9801]
626	ENSG00000205837	LINC00487	0.493707	0.351543	2.85016	0.00986502	0.62699	0.460694	16 x 24		2 p25	long intergenic non-protein coding RNA 487 [Source:HGNC Symbol;Acc:HGNC:42947]
627	ENSG00000141068	KSR1	-0.51207	-0.195178	-2.83023	0.00986569	0.62699	0.460703	9 x 5		17 q11	kinase suppressor of ras 1 [Source:HGNC Symbol;Acc:HGNC:6465]
628	ENSG00000171903	CYP4F11	0.691915	0.537795	2.78888	0.00990794	0.62699	0.461224	11 x 40	K	19 p13	cytochrome P450 family 4 subfamily F member 11 [Source:HGNC Symbol;Acc:HGNC:13265]
629	ENSG00000137871	ZNF280D	-0.247416	-0.115846	-2.82003	0.00992141	0.62699	0.46139	2 x 16		15 q21	zinc finger protein 280D [Source:HGNC Symbol;Acc:HGNC:25953]
630	ENSG00000101280	ANGPT4	-0.322268	-0.142957	-2.77786	0.00994243	0.62699	0.461648	13 x 1		20 p13	angiopoietin 4 [Source:HGNC Symbol;Acc:HGNC:487]
631	ENSG00000175984	DENND2C	-0.422333	-0.173443	-2.82373	0.00996884	0.62699	0.46197	14 x 6		1 p13	DENN domain containing 2C [Source:HGNC Symbol;Acc:HGNC:24748]
632	ENSG00000226087		0.324226	0.212786	2.84029	0.00999377	0.62699	0.462274	17 x 36		2 p21
633	ENSG00000164619	BMPER	-0.508126	-0.194334	-2.81841	0.00999704	0.62699	0.462313	14 x 1		7 p14	BMP binding endothelial regulator [Source:HGNC Symbol;Acc:HGNC:24154]
634	ENSG00000100665	SERPINA4	-0.332716	-0.146448	-2.77218	0.0100161	0.62699	0.462545	7 x 36		14 q32	serpin family A member 4 [Source:HGNC Symbol;Acc:HGNC:8948]
635	ENSG00000101331	CCM2L	-0.411933	-0.170581	-2.81085	0.0100317	0.62699	0.462733	11 x 1		20 q11	CCM2 like scaffolding protein [Source:HGNC Symbol;Acc:HGNC:16153]
636	ENSG00000157551	KCNJ15	-0.522439	-0.197348	-2.80191	0.0100406	0.62699	0.462841	26 x 3	G	21 q22	potassium voltage-gated channel subfamily J member 15 [Source:HGNC Symbol;Acc:HGNC:6261]
637	ENSG00000214960	ISPD	-0.462125	-0.183735	-2.8334	0.0100428	0.62699	0.462868	3 x 16		7 p21	isoprenoid synthase domain containing [Source:HGNC Symbol;Acc:HGNC:37276]
638	ENSG00000225953	SATB2-AS1	-0.209741	-0.100805	-2.76821	0.0100442	0.62699	0.462884	17 x 13		2 q33	SATB2 antisense RNA 1 [Source:HGNC Symbol;Acc:HGNC:26490]
639	ENSG00000133878	DUSP26	-0.484372	-0.189035	-2.79973	0.0100962	0.62699	0.463509	27 x 27		8 p12	dual specificity phosphatase 26 [Source:HGNC Symbol;Acc:HGNC:28161]
640	ENSG00000004799	PDK4	-0.564349	-0.205398	-2.81209	0.0101491	0.62699	0.46414	13 x 2		7 q21	pyruvate dehydrogenase kinase 4 [Source:HGNC Symbol;Acc:HGNC:8812]
641	ENSG00000124664	SPDEF	1.2886	1.25453	2.82425	0.0101632	0.62699	0.464307	9 x 40	K	6 p21	SAM pointed domain containing ETS transcription factor [Source:HGNC Symbol;Acc:HGNC:17257]
642	ENSG00000119661	DNAL1	-0.349487	-0.151902	-2.8315	0.0101656	0.62699	0.464336	4 x 38		14 q24	dynein axonemal light chain 1 [Source:HGNC Symbol;Acc:HGNC:23247]
643	ENSG00000235763		0.215959	0.134039	2.81467	0.0101937	0.62699	0.464668	18 x 30		10 p13	small nuclear ribonucleoprotein polypeptide G pseudogene 5 [Source:HGNC Symbol;Acc:HGNC:39324]
644	ENSG00000106609	TMEM248	-0.218791	-0.104503	-2.80437	0.0102072	0.62699	0.464827	18 x 35		7 q11	transmembrane protein 248 [Source:HGNC Symbol;Acc:HGNC:25476]
645	ENSG00000274515		0.189318	0.115844	2.79947	0.0102079	0.62699	0.464835	11 x 32		15 q24
646	ENSG00000221406	MIR320B2	0.168726	0.102101	2.783	0.0102134	0.64128	0.4649	12 x 18		1 q42	microRNA 320b-2 [Source:HGNC Symbol;Acc:HGNC:35256]
647	ENSG00000237775		0.160498	0.096688	2.79624	0.0102542	0.64128	0.465409	18 x 31		6 p21	DDR1 antisense RNA 1 (head to head) [Source:HGNC Symbol;Acc:HGNC:28694]
648	ENSG00000279943	FLJ38576	-0.333348	-0.146657	-2.81003	0.0102681	0.64128	0.465583	30 x 34		4 q35	uncharacterized LOC651430 [Source:NCBI gene;Acc:651430]
649	ENSG00000258815		-0.868155	-0.229198	-2.81306	0.0103043	0.64128	0.46603	26 x 30		12 q21
650	ENSG00000280182		-0.283728	-0.129459	-2.82692	0.010315	0.64128	0.466163	18 x 31		16 q23
651	ENSG00000179698	WDR97	0.733205	0.579848	2.82176	0.0103332	0.64128	0.466388	8 x 26	J	8 q24	WD repeat domain 97 [Source:HGNC Symbol;Acc:HGNC:26959]
652	ENSG00000253986		-0.235804	-0.11131	-2.8057	0.0103442	0.650542	0.466523	20 x 31		8 p21
653	ENSG00000145743	FBXL17	-0.462209	-0.183755	-2.82313	0.0103746	0.650542	0.466909	1 x 16	I	5 q21	F-box and leucine rich repeat protein 17 [Source:HGNC Symbol;Acc:HGNC:13615]
654	ENSG00000232578		-0.19614	-0.0951463	-2.79978	0.0104283	0.650542	0.467589	14 x 12		5 q15
655	ENSG00000242766		-0.347526	-0.151274	-2.7062	0.010504	0.650542	0.468539	39 x 3	E	2 p11	immunoglobulin kappa variable 1D-17 [Source:HGNC Symbol;Acc:HGNC:5749]
656	ENSG00000145730	PAM	-0.589287	-0.209639	-2.80888	0.010523	0.650542	0.468775	8 x 4		5 q21	peptidylglycine alpha-amidating monooxygenase [Source:HGNC Symbol;Acc:HGNC:8596]
657	ENSG00000263818	LOC100131347	0.325983	0.214127	2.80985	0.0105304	0.650542	0.468868	11 x 33		17 q12
658	ENSG00000257185		-0.352435	-0.152841	-2.77169	0.0105395	0.650542	0.468981	26 x 31		14 q12	long intergenic non-protein coding RNA 2293 [Source:HGNC Symbol;Acc:HGNC:53209]
659	ENSG00000273703	HIST1H2BM	-0.349499	-0.151906	-2.74808	0.0105495	0.650542	0.469105	28 x 35		6 p22	histone cluster 1 H2B family member m [Source:HGNC Symbol;Acc:HGNC:4750]
660	ENSG00000158106	RHPN1	0.59339	0.441981	2.80672	0.0106311	0.650542	0.470111	19 x 17		8 q24	rhophilin Rho GTPase binding protein 1 [Source:HGNC Symbol;Acc:HGNC:19973]
661	ENSG00000153936	HS2ST1	-0.235057	-0.111015	-2.78562	0.0106547	0.650542	0.4704	30 x 18		1 p22	heparan sulfate 2-O-sulfotransferase 1 [Source:HGNC Symbol;Acc:HGNC:5193]
662	ENSG00000176165	FOXG1	-0.641649	-0.217214	-2.7416	0.0106687	0.650542	0.470571	34 x 23	B	14 q12	forkhead box G1 [Source:HGNC Symbol;Acc:HGNC:3811]
663	ENSG00000137962	ARHGAP29	0.244447	0.154012	2.67605	0.0106694	0.650542	0.47058	4 x 12		1 p22	Rho GTPase activating protein 29 [Source:HGNC Symbol;Acc:HGNC:30207]
664	ENSG00000174306	ZHX3	-0.382102	-0.161978	-2.78186	0.0106777	0.650542	0.470681	4 x 5	H	20 q12	zinc fingers and homeoboxes 3 [Source:HGNC Symbol;Acc:HGNC:15935]
665	ENSG00000250101		0.288153	0.185692	2.79244	0.0106849	0.650542	0.470769	12 x 34		5 q35
666	ENSG00000156194	PPEF2	0.198198	0.121858	2.78638	0.010699	0.650542	0.47094	14 x 14		4 q21	protein phosphatase with EF-hand domain 2 [Source:HGNC Symbol;Acc:HGNC:9244]
667	ENSG00000223745		0.500909	0.357858	2.7911	0.0107216	0.650542	0.471215	6 x 26		1 p22	CCDC18 antisense RNA 1 [Source:HGNC Symbol;Acc:HGNC:52262]
668	ENSG00000187689	AMTN	-0.145423	-0.07297	-2.70089	0.0107575	0.650542	0.471649	37 x 20	C	4 q13	amelotin [Source:HGNC Symbol;Acc:HGNC:33188]
669	ENSG00000152409	JMY	-0.365537	-0.156948	-2.8003	0.01076	0.650542	0.471679	5 x 11		5 q14	junction mediating and regulatory protein, p53 cofactor [Source:HGNC Symbol;Acc:HGNC:28916]
670	ENSG00000263786		0.30992	0.201938	2.78957	0.0107653	0.650542	0.471742	9 x 20		17 q25
[truncated: 31,369 more rows]

## Sheet: OV_gBRCA1.vs.OV_sBRCA1
Sample Summary:
%DE:;;0.16
[truncated: 32,049 more rows]

## Sheet: OV_gBRCA1.vs.OV_sBRCA2
Sample Summary:
[truncated: 32,050 more rows]

## Sheet: OV_gBRCA2.vs.OV_noBRCA
Sample Summary:
[truncated: 32,050 more rows]

[truncated: 5 more sheets: OV_gBRCA2.vs.OV_sBRCA2, OV_sBRCA1.vs.OV_gBRCA2, OV_sBRCA1.vs.OV_noBRCA, OV_sBRCA1.vs.OV_sBRCA2, OV_sBRCA2.vs.OV_noBRCA]
